# Supplementary material for: Protein feeding mediates sex pheromone biosynthesis in an insect
Source: eLife. 2023 Jan 19;12:e83469. doi: 10.7554/eLife.83469 (PMC9908074; doi:10.7554/eLife.83469)
Supplement: Figure 1—source data 1. [file elife-83469-fig1-data1.xlsx]

## Sheet: Fig. 1
Figure 1A Male dead number								Figure 1B Rectum size comparison
	Sucrose	Sucrose + YH	Glucose	Glucose + YH	Fructose	Fructose + YH			Sucrose	Glucose	Fructose
1d	5	7	6	5	6	3		YH -	422.09	1047.39	1225.03
2d	4	4	3	3	2	3			1187.64	1197.4	1267.34
3d	2	2	1	1	0	0			659.27	1347.38	742.44
4d	0	0	0	1	0	0			894.9	1538.1	1203.98
5d	0	0	0	0	0	0			1093.1	902.55	834.75
6d	0	0	0	0	0	0			952.73	1436.56	1236.23
7d	0	0	0	0	0	0			1447.93	1634.06	1555.09
8d	0	0	0	0	0	0			1307.15	943.24	629.24
9d	0	0	0	0	0	0			811.95	1323.2	1008
10d	0	0	0	0	0	0			1238.35	856.3	1483.72
11d	0	0	0	0	0	0			1115.44	1139.77	579.46
12d	0	0	0	0	0	0			1166.86	839.56	1423.72
									970.99	631.68	1094.94
Figure 1F Mate male number									805.3	1264.76	918.36
	Sucrose	Glucose	Fructose						693.91	613.87	1084.76
YH-	2	3	1						1137.14	1207.85	780.25
	3	2	1						1469.67	1622.45	793.52
	3	1	1						973.59	1133.5	1278.42
	3	1	1						1247.1	1411.49	1493.19
	0	2	2						1005.57	1529.28	1237.81
YH+	4	4	7						563.62	1030.11	1305.71
	6	5	8						885.2	1479.23	571.11
	5	2	7						1064.64	1323.6	1094.12
	5	4	7						1213.03	1424.76	1371.19
	5	5	7						1360.35	877.11	1176.35
									668.73	1162.32	1140.82
									1135.63	1582.87	1024.81
									681.75	991.67	646.34
									893.4	1550.86	1290.42
									461.14	1452.11	901.58
									877.94	1327.32	979.8
									858.03	1280.79	1087.74
									1203.87	1592.6	1083.26
									1240.93	585.72	1336.93
									819.16	618.37	929.5
									516.81	1582.62	826.18
									1068.32	1137.03	921.94
									606.14	529.49	1240.93
									427.48	894.9	896.75
									1003.28	1136.66	1124.53
								YH +	1381.32	1745.85	1111.69
									1166.66	1021.15	906.72
									982.92	1233.08	925.17
									1135.13	1233.4	1412.06
									1159.54	924.62	686.29
									1158.92	686.45	930.36
									816.01	1243.77	1200.04
									662.74	788.35	1350.86
									893.33	1435.03	1027.36
									1473	1303.56	1032.36
									840.84	998.7	1090.55
									1315.98	951.71	825.81
									829.15	838.35	744.26
									1027.85	1070.58	816.25
									509.92	1303.25	750.14
									709.42	708.13	1322.9
									1498.17	902.91	832.29
									1620.21	1191.69	771.43
									1477.01	1363.27	710.1
									877.89	1194.73	501.23
									1056.63	1148.25	1214.88
									1369.71	1102.94	1068.14
									1370.89	787.82	858.27
									537.85	916.6	705.74
									1361.03	1182.92	694.02
									978.32	301.97	1337.46
									1445.12	1271.9	791.58
									950.43	1403.24	570
									811.5	1252.28	825.81
									781.36	1379.43	829.76
									1078.3	947.1	671.73
									882.69	1058.2	823.55
									1250.5	883.19	1407.52
									1094.28	835.94	1040.15
									1215.01	1257.91	628.67
									1017.99	998.39	1151.77
									896.39	846.89	1413.68
									1159.47	834.43	615.89
									1327.36	1052.47	1382.22
									1010.4	1201.64	587.45
