# Supplementary material for: Protein feeding mediates sex pheromone biosynthesis in an insect
Source: eLife. 2023 Jan 19;12:e83469. doi: 10.7554/eLife.83469 (PMC9908074; doi:10.7554/eLife.83469)
Supplement: Figure 2—source data 1. [file elife-83469-fig2-data1.xlsx]

## Sheet: Fig. 2
Figure 2A 16S rRNA copies					Figure 2D Glucose content (μg/mg)					Figure 2E Threonine content (μg/mg)					Figure 2F Glycine content (μg/mg)
	Sucrose	Glucose	Fructose			Sucrose	Glucose	Fructose			Sucrose	Glucose	Fructose			Sucrose	Glucose	Fructose
YH-	7.83	8.02	8.53		YH-	3.83036	5.33036	3.80357		YH-	0.0243768	0.0269663	0.0176311		YH-	0.217221	0.263944	0.252678
	8.25	8.03	8.35			3.85714	5.38393	4.09821			0.0227905	0.0221825	0.0259996			0.234113	0.224044	0.222729
	8.33	8.07	8.12			3.58929	5.38393	4.01786			0.0285543	0.0261059	0.019213			0.239576	0.262508	0.193254
	7.88	8.55	8.62			3.66964	5.35714	2.94643			0.0228052	0.0236545	0.0204107			0.15313	0.238858	0.234296
	8.48	8.22	8.63			3.58929	5.8125	3			0.0241171	0.0252732	0.02152			0.181122	0.268835	0.275686
	8.05	8.07	9.1			3.66964	5.8125	2.94643		YH+	0.111967	0.0851861	0.0904		YH+	0.288437	0.269722	0.274618
YH+	9.35	8.76	7.99			3.05357	5.51786	3.34821			0.089933	0.0997616	0.0888955			0.239673	0.34107	0.239311
	7.78	8.75	8.32			3.10714	5.70536	3.42857			0.104577	0.0726343	0.0807195			0.283872	0.253614	0.288773
	8.3	8.32	9.07			3.1875	5.67857	3.42857			0.0916359	0.0924902	0.0890659			0.236062	0.341054	0.300524
	7.96	8.6	8.32			3.61607	4.28571	4.41964			0.101316	0.0818595	0.123895			0.267276	0.287837	0.307931
	8.74	7.56	8.51			3.58929	4.20536	4.41964
	8.52	8.21	9.07			3.66964	4.44643	4.39286
						3.72321	4.17857	4.76786
						3.66964	4.20536	4.76786
						3.61607	4.09821	4.82143
					YH+	5.59821	4.90179	5.30357
						5.75893	4.5	5.30357
						5.73214	4.90179	5.35714
						5.03571	5.14286	4.33929
						5.11607	5.11607	4.23214
						5.08929	5.11607	4.28571
						4.41964	4.95536	4.58036
						4.25893	5.33036	4.55357
						4.39286	5.35714	4.58036
						4.15179	4.09821	4.66071
						4.07143	4.23214	4.66071
						4.125	4.125	4.66071
						4.07143	3.75	4.63393
						3.96429	3.88393	4.55357
						3.96429	3.77679	4.6875
