# Supplementary material for: Protein feeding mediates sex pheromone biosynthesis in an insect
Source: eLife. 2023 Jan 19;12:e83469. doi: 10.7554/eLife.83469 (PMC9908074; doi:10.7554/eLife.83469)
Supplement: Figure 3—source data 1. [file elife-83469-fig3-data1.xlsx]

## Sheet: Sheet1
	Sucrose vs Sucrose + YH	Glucose vs Glucose + YH	Fructose vs Fructose + YH
Gene number	770 (up:345, down:425	914 (up:460, down:454	746 (up:366, down:380)
Overlap gene in glycine and threonine metabolism	2 (Sardh and AGXT2)
