# Supplementary material for: Protein feeding mediates sex pheromone biosynthesis in an insect
Source: eLife. 2023 Jan 19;12:e83469. doi: 10.7554/eLife.83469 (PMC9908074; doi:10.7554/eLife.83469)
Supplement: Figure 3—source data 2. [file elife-83469-fig3-data2.xlsx]

## Sheet: Fig. 3
Figure 3A PCA obtained from gene expression profiles showing differences between YH-fed and YH-deprived males.												Figure 3D Sardh relative expression
	PCA1	PCA2											Sucrose	Glucose	Fructose
Sucrose-1	-3637.42	-4583.79											0.204459	0.125512	0.381947
Sucrose-2	-6200.86	2205.22											0.10674	0.1266	0.618046
Sucrose-3	-6899.52	-46.8135											0.244317	0.137974	0.564984
Sucrose-4	-7477.6	-348.939											0.221607	0.226793	0.377901
Sucrose-5	-8555.95	3471.59											0.126101	0.174034	0.304954
Sucrose + YH1	6548.19	637.823											0.998088	1	0.99866
Sucrose + YH2	4791.72	7075.91											0.87611	1.03773	1.31184
Sucrose + YH3	7968.99	-3341.95											0.577291	1.24382	1.45108
Sucrose + YH4	8880.18	2807.93											0.56098	0.973752	0.990706
Sucrose + YH5	6739.4	-3599.25											1.15109	1.63337	1.50328
Glucose-1	-6902.78	-1384.7
Glucose-2	-7993.97	3965.74
Glucose-3	-9279.07	1534.84
Glucose-4	-4140.27	-3737.84
Glucose-5	-9840.02	2259.98
Glucose + YH1	5764.37	439.164
Glucose + YH2	7119.69	-4506.26
Glucose + YH3	5396.63	-789.586
Glucose + YH4	4574.77	849.846
Glucose + YH5	4849.2	4198.05
Fructose-1	-3867.98	-3885.28
Fructose-2	-2356.94	-2845.24
Fructose-3	-5009.41	-3942.88
Fructose-4	-566.344	-4781.67
Fructose-5	-5802.19	494.39
Fructose + YH1	4081.64	7240
Fructose + YH2	8279.22	-1844.39
Fructose + YH3	3421.63	457.702
Fructose + YH4	6162.94	-324.793
Fructose + YH5	3951.73	2325.19
