# Supplementary material for: Protein feeding mediates sex pheromone biosynthesis in an insect
Source: eLife. 2023 Jan 19;12:e83469. doi: 10.7554/eLife.83469 (PMC9908074; doi:10.7554/eLife.83469)
Supplement: Figure 4—source data 1. [file elife-83469-fig4-data1.xlsx]

## Sheet: Fig. 4
Figure 4A Treonine content						Figure 4B Glycine content
0d	3d	6d	9d	12d		0d	3d	6d	9d	12d
0.106972	0.0941594	0.109264	0.0775464	0.125061		0.124925	0.200968	0.266413	0.201964	0.285109
0.085908	0.11053	0.105292	0.0963621	0.0906406		0.10602	0.192542	0.208686	0.212758	0.303427
0.0883362	0.100731	0.075842	0.0955433	0.0869344		0.1025	0.21144	0.244489	0.217892	0.223634
0.0698576	0.0968446	0.0630179	0.098321	0.477561		0.120002	0.184054	0.203951	0.205456	0.245507
	0.123465	0.0841071	0.11331	0.076104			0.199329	0.202301	0.271569	0.26345
Figure 4D Sardh fpkm						Figure 4E Sardh relative expression
0d	3d	6d	9d	12d		0d	3d	6d	9d	12d
0.16	1.16	1.06	1.59	2.28		1.00031	1.21589	2.4854	4.2669	4.91606
0.4	0.96	1.43	1.2	1.58		0.764882	0.947121	3.48747	3.41607	8.04
0.2	0.79	0.94	1.53	2.62		1.4029	1.13927	4.07108	10.7174	8.06731
0.06	1.33	1.31	1.21	1.81		1.31312	0.606598	3.70226	12.0533	5.73101
0.21	0.98	1.45	1.88	2.79		0.718844	1.39296	3.94626	8.7251	8.94062
