# Supplementary material for: Protein feeding mediates sex pheromone biosynthesis in an insect
Source: eLife. 2023 Jan 19;12:e83469. doi: 10.7554/eLife.83469 (PMC9908074; doi:10.7554/eLife.83469)
Supplement: Figure 5—source data 1. [file elife-83469-fig5-data1.xlsx]

## Sheet: Fig. 5
Figure 5A Sardh relative expression				Figure 5B Threonine content				Figure 5C Glycine content
Head	Thorax	Rectum		dsSardh	dsGFP	Control		dsSardh	dsGFP	Control
1	0.88	2.58		0.0712144	0.128185	0.105041		0.162001	0.205685	0.24792
0.9	0.7	4.78		0.0952105	0.106279	0.105234		0.146712	0.186411	0.194453
0.78	1.3	1.66		0.0917449	0.104191	0.0992519		0.144315	0.246843	0.239362
0.91	0.6	1.52		0.0942696	0.125665	0.110524		0.13251	0.344875	0.176809
Figure 5D TMP content				Figure 5E TTMP content				Figure 5F Mated male
dsSardh	dsGFP	Control		dsSardh	dsGFP	Control		dsSardh	dsGFP	Control
80.257	132.289	132.289		103.274	129.91	76.154		0	5	10
95.578	155.206	155.206		117.417	133.07	92.608		0	2	10
62.958	151.632	151.632		120.897	216.863	94.153		1	8	3
76.999	201.348	201.348		147.284	236.636	227.41		1	5	8
								1	3	5
