# Supplementary material for: Protein feeding mediates sex pheromone biosynthesis in an insect
Source: eLife journal article supplement (doi:10.7554/elife.83469), 2023-01-19
Supplement: supp [file elife_poa_e83469_Figure_2_figure_supplement_1.docx]

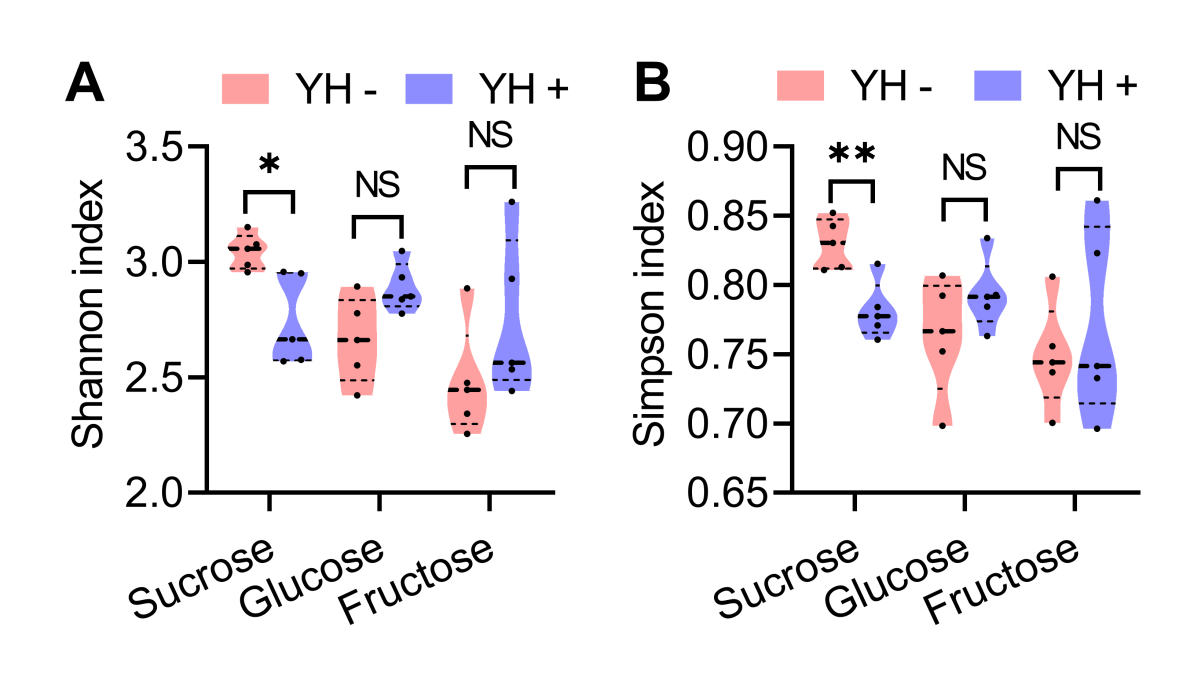


**Figure 2 – figure supplement 1** Boxplots showing the estimated diversity of the microbial community based on Shannon (A) and Inverse Simpson (B) indices of the 16S amplicon sequences (*n* = 5 replicates, Student’s *t* test, NS” no significance, * *P* < 0.05, ** *P* < 0.001). In volin plots, where the volin encompass the first to the third quartiles, inside the volin the horizontal line shows the median.
