# Supplementary material for: Protein feeding mediates sex pheromone biosynthesis in an insect
Source: eLife journal article supplement (doi:10.7554/elife.83469), 2023-01-19
Supplement: supp [file elife_poa_e83469_Figure_3_figure_supplement_1.docx]

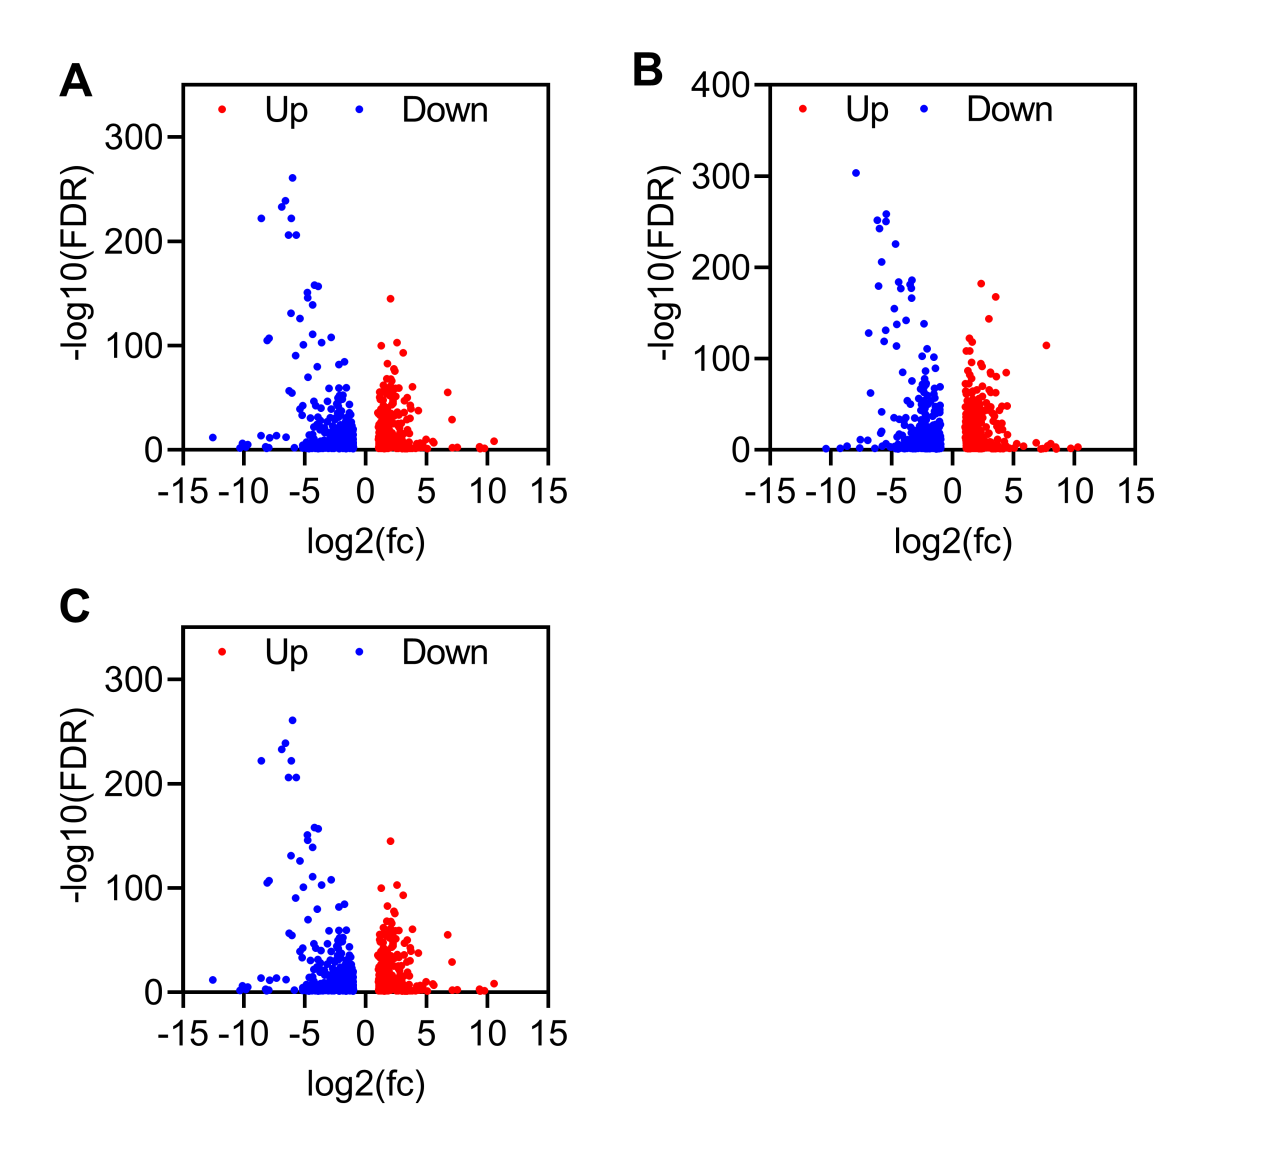


**Figure 3 – figure supplement 1** Differential expressed genes in sucrose (A), glucose (B) and fructose (C) groups.
