# Supplementary material for: Protein feeding mediates sex pheromone biosynthesis in an insect
Source: eLife journal article supplement (doi:10.7554/elife.83469), 2023-01-19
Supplement: supp [file elife_poa_e83469_Figure_3_figure_supplement_2.docx]

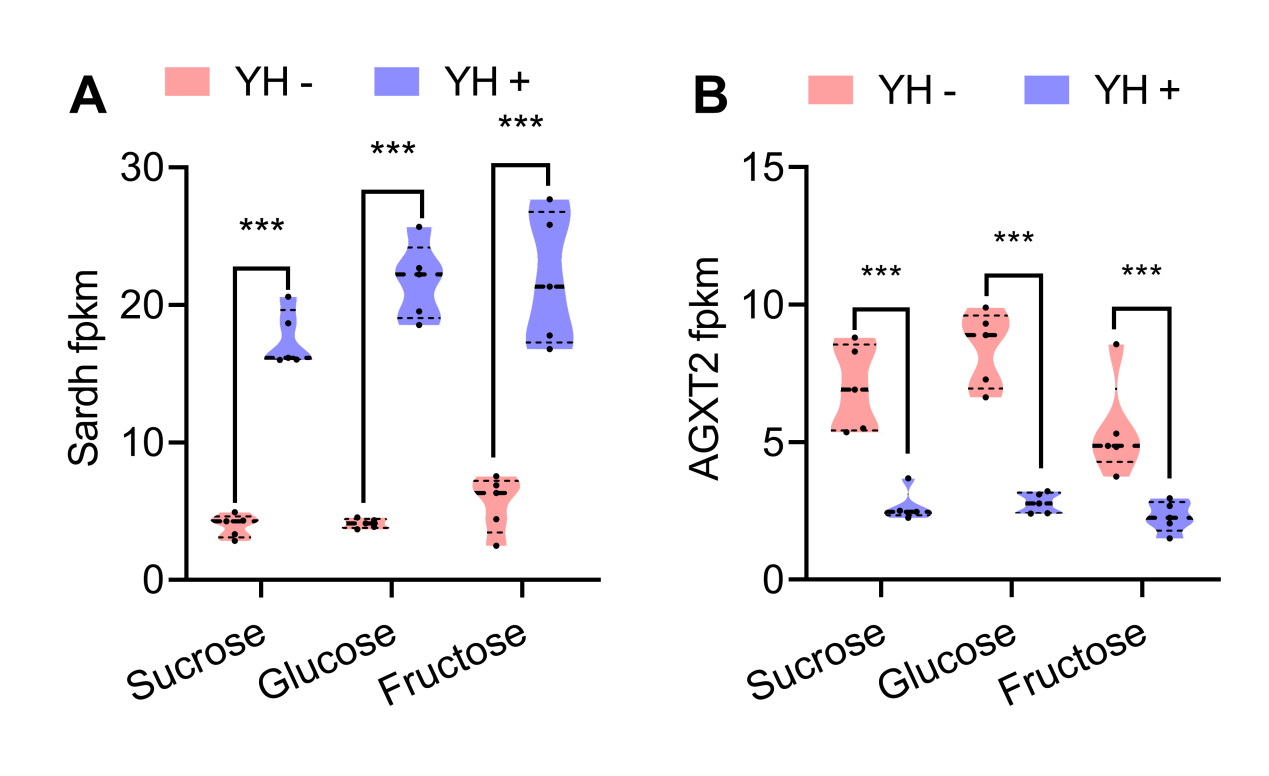


**Figure 3 – figure supplement 2** fpkm values of the differentially expressed genes in glycine, serine and threonine metabolism pathway (*n* = 5 replicates, Student’s *t* test, *** *P* < 0.0001). In volin plots, where the volin encompass the first to the third quartiles, inside the volin the horizontal line shows the median.
