# Supplementary material for: Protein feeding mediates sex pheromone biosynthesis in an insect
Source: eLife journal article supplement (doi:10.7554/elife.83469), 2023-01-19
Supplement: supp [file elife_poa_e83469_Figure_3_source_data_2.xlsx]

## Sheet: Fig. 3
Figure 3D Sardh relative expression
	Sucrose	Glucose	Fructose
YH-	0.204459	0.125512	0.381947
	0.10674	0.1266	0.618046
	0.244317	0.137974	0.564984
	0.221607	0.226793	0.377901
	0.126101	0.174034	0.304954
YH+	0.998088	1	0.99866
	0.87611	1.03773	1.31184
	0.577291	1.24382	1.45108
	0.56098	0.973752	0.990706
	1.15109	1.63337	1.50328
