# Supplementary material for: Protein feeding mediates sex pheromone biosynthesis in an insect
Source: eLife journal article supplement (doi:10.7554/elife.83469), 2023-01-19
Supplement: supp [file elife_poa_e83469_Figure_4_figure_supplement_1.docx]

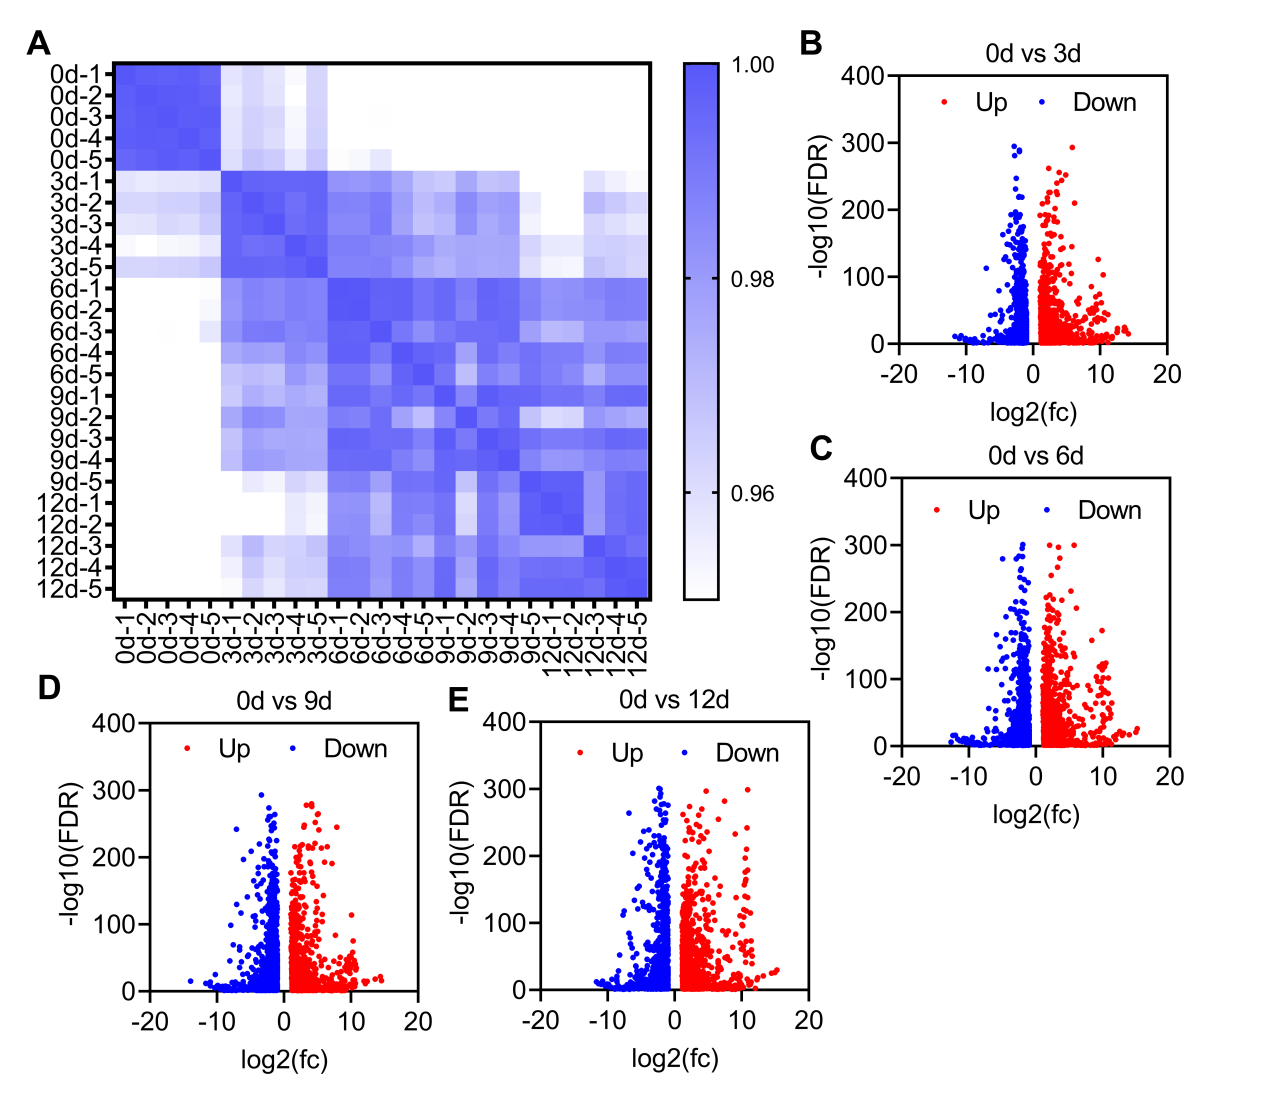


**Figure 4 – figure supplement 1** Transcriptome comparisons between different development stages. (A) Pearson correlation coefficient showing the similarity between the samples. Higher similarity of the transcriptome was shown by darker blue color (higher correlation coefficient). (B-E) Differential expressed genes between different development stages.
