# Supplementary material for: Protein feeding mediates sex pheromone biosynthesis in an insect
Source: eLife journal article supplement (doi:10.7554/elife.83469), 2023-01-19
Supplement: supp [file elife_poa_e83469_Figure_5_figure_supplement_1.docx]

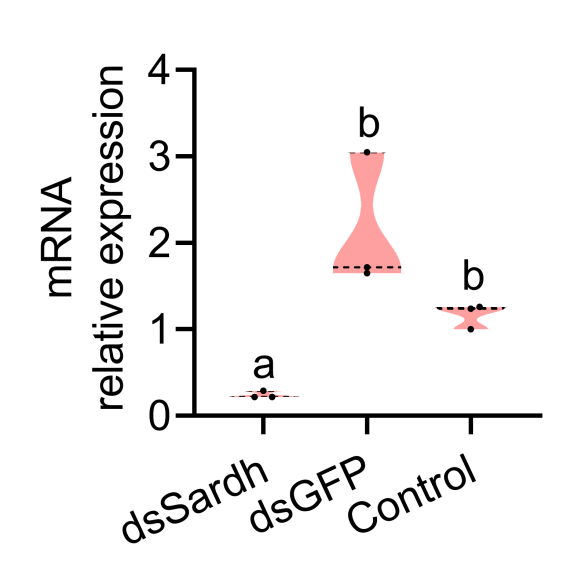


**Figure 5- figure supplement 1** RNAi efficiency of Sardh after 48h (*n* = 3 replicates, Different letters above the error bars indicate significant differences at the 0.05 level analyzed by ANOVA followed by Tukey’s test). In volin plots, where the volin encompass the first to the third quartiles, inside the volin the horizontal line shows the median.
