# Supplementary material for: Protein feeding mediates sex pheromone biosynthesis in an insect
Source: eLife. 2023 Jan 19;12:e83469. doi: 10.7554/eLife.83469 (PMC9908074; doi:10.7554/eLife.83469)
Supplement: Supplementary file 1. [file elife-83469-supp1.xlsx]

## Sheet: all.otus.profiling
OTU	Total_tags	Glucose tags	Glucose tags	Glucose tags	Glucose tags	Glucose tags	Glucose + YH tags	Glucose + YH tags	Glucose + YH tags	Glucose + YH tags	Glucose + YH tags	Fructose tags	Fructose tags	Fructose tags	Fructose tags	Fructose tags	Fructose + YH tags	Fructose + YH tags	Fructose + YH tags	Fructose + YH tags	Fructose + YH tags	Sucrose tags	Sucrose tags	Sucrose tags	Sucrose tags	Sucrose tags	Sucrose +YH tags	Sucrose +YH tags	Sucrose +YH tags	Sucrose +YH tags	Sucrose +YH tags	Glucose relative_abundance	Glucose_relative_abundance	Glucose_relative_abundance	Glucose_relative_abundance	Glucose_relative_abundance	Glucose + YH relative_abundance	Glucose + YH relative_abundance	Glucose + YH relative_abundance	Glucose + YH relative_abundance	Glucose + YH relative_abundance	Fructose_relative_abundance	Fructose_relative_abundance	Fructose_relative_abundance	Fructose_relative_abundance	Fructose_relative_abundance	Fructose + YH relative_abundance	Fructose + YH relative_abundance	Fructose + YH relative_abundance
OTU000001	753160	26461	39113	50163	33169	36473	15575	33404	13382	24215	15285	29756	27881	31176	31906	21960	13666	30731	23109	14247	27742	10675	15592	34331	19817	28080	32508	16362	23617	16930	15834	32.5902	41.1599	49.1674	33.9864	34.2611	19.7841	36.1382	13.015	24.4246	16.8215	30.8691	33.89	31.0979	32.7006	22.8448	16.7805	43.7023	30.4166
OTU000002	506570	9295	11123	18341	12641	19029	1710	10216	22106	17436	8644	10043	16549	12944	16882	10886	16318	13143	28328	14250	43852	6690	21120	10700	25975	14410	21763	20005	31428	10614	30129	11.448	11.7051	17.977	12.9525	17.875	2.17212	11.0522	21.4997	17.5869	9.51291	10.4187	20.1157	12.9116	17.3025	11.3246	20.0368	18.6905	37.2859
OTU000003	390778	14307	16710	14743	29538	21975	346	2264	5674	9715	5896	25028	23477	37917	31897	45533	5952	872	1376	552	737	564	3318	3213	1971	986	18097	30149	4696	25936	7339	17.621	17.5845	14.4504	30.2659	20.6423	0.439505	2.44931	5.51838	9.79908	6.48868	25.9643	28.5369	37.8221	32.6914	47.3675	7.30845	1.24006	1.81112
OTU000004	340609	3195	3403	7721	5598	11131	27477	19791	38554	23541	39123	3062	2805	5143	585	600	4143	13641	3091	26510	7141	470	490	8366	2150	1107	9384	17050	27610	21973	5754	3.93507	3.58109	7.56775	5.73595	10.456	34.9025	21.411	37.4966	23.7447	43.0557	3.17655	3.40955	5.13012	0.59957	0.624174	5.08718	19.3987	4.06844
OTU000005	166138	2920	16944	1573	644	1843	3237	7413	2629	2358	2820	2102	6362	5755	10428	3999	15988	1954	1319	17349	2518	20112	3317	11862	4008	9221	1012	2409	1431	721	1890	3.59637	17.8307	1.54178	0.65987	1.73123	4.11178	8.01978	2.5569	2.37841	3.10347	2.18063	7.73317	5.74059	10.6877	4.16012	19.6316	2.77876	1.7361
OTU000006	116643	2937	1964	622	829	4844	852	589	1416	2460	572	9714	560	1218	547	8258	1889	1857	11688	368	467	2639	9265	13971	17213	14646	340	458	516	2803	1141	3.61731	2.06678	0.609654	0.849429	4.55024	1.08225	0.637211	1.37716	2.48129	0.629498	10.0774	0.680694	1.21495	0.560623	8.59072	2.3195	2.64082	15.384
OTU000007	76624	15804	294	480	3236	1376	337	563	890	690	287	1825	878	512	1017	88	518	404	496	138	698	1588	18419	5950	817	8943	3724	561	2490	398	3203	19.4647	0.309386	0.470473	3.31574	1.29255	0.428072	0.609083	0.86559	0.695971	0.31585	1.89327	1.06723	0.510718	1.04233	0.091546	0.636051	0.574525	0.652846
OTU000008	68759	1814	537	273	6645	4754	507	383	1182	349	281	8464	381	425	1895	2872	3498	1151	791	343	142	2619	10504	623	6648	9178	136	492	405	342	1125	2.23418	0.565103	0.267581	6.80875	4.4657	0.644014	0.41435	1.14958	0.35202	0.309247	8.78063	0.463115	0.423936	1.94219	2.98771	4.29519	1.63683	1.04113
OTU000009	56358	410	294	1403	1156	969	15063	3966	3272	4360	5817	817	682	1027	142	152	1990	179	341	4217	2721	810	817	540	569	403	1368	597	524	1234	518	0.50497	0.309386	1.37515	1.18449	0.910235	19.1337	4.29063	3.18226	4.39773	6.40173	0.847563	0.828988	1.02443	0.145537	0.158124	2.44352	0.254554	0.448832
OTU000010	38800	575	979	1236	993	943	1259	1259	1332	661	4216	1064	368	1521	557	184	469	2434	1285	2821	3912	1076	2282	928	827	2601	274	246	1916	156	426	0.708189	1.03023	1.21147	1.01747	0.885812	1.59924	1.36205	1.29547	0.66672	4.6398	1.1038	0.447313	1.51719	0.570872	0.191413	0.575884	3.46137	1.69135
OTU000011	37774	237	278	180	224	183	89	104	183	177	198	2	0	6	11	9	4	306	484	3	1	11209	2202	248	8321	12919	4	10	5	140	37	0.291897	0.292548	0.176427	0.22952	0.171902	0.113052	0.112513	0.177981	0.178532	0.217903	0.002075	0	0.005985	0.011274	0.009363	0.004912	0.43516	0.637052
OTU000012	32431	12	11	96	301	41	1223	54	22	19	9	97	59	109	75	85	11452	1172	1106	6278	846	6	19	701	62	69	1900	4393	546	935	733	0.01478	0.011576	0.094095	0.308417	0.038514	1.55351	0.05842	0.021397	0.019164	0.009905	0.100629	0.071716	0.108727	0.076868	0.088425	14.0619	1.66669	1.45574
OTU000013	19605	66	79	93	71	68	485	802	7994	3944	4244	365	153	211	8	6	8	10	12	310	146	14	103	135	80	79	16	11	11	42	39	0.081288	0.083134	0.091154	0.07275	0.063876	0.616069	0.867646	7.77475	3.97813	4.67061	0.378654	0.185975	0.210472	0.008199	0.006242	0.009823	0.014221	0.015795
OTU000014	17595	809	1339	1551	338	105	73	371	272	174	367	2044	447	89	207	264	2646	458	823	1828	1052	296	35	225	56	75	300	96	517	304	434	0.996391	1.40907	1.52022	0.346329	0.098632	0.092728	0.401367	0.26454	0.175506	0.403891	2.12046	0.54334	0.088777	0.212155	0.274637	3.24902	0.651318	1.08325
OTU000015	17507	170	243	321	102	117	180	1058	403	521	380	647	225	373	260	64	511	347	95	201	272	466	351	3146	3340	481	305	178	712	610	1428	0.209378	0.255717	0.314629	0.104514	0.109905	0.228644	1.1446	0.391947	0.525509	0.418198	0.671204	0.273493	0.372066	0.266475	0.066579	0.627456	0.493465	0.125041
OTU000016	17419	620	359	1246	200	209	154	8808	2117	297	1549	111	19	78	41	29	35	13	10	8	534	26	32	71	84	85	82	90	259	37	216	0.763613	0.377787	1.22127	0.204929	0.196325	0.195618	9.52896	2.05894	0.29957	1.70471	0.115152	0.023095	0.077805	0.042021	0.030168	0.042976	0.018487	0.013162
OTU000017	9548	13	20	13	46	30	268	53	113	6674	29	3	152	6	3	5	16	7	4	5	34	7	28	26	16	22	17	725	109	64	1040	0.016011	0.021047	0.012742	0.047134	0.028181	0.340426	0.057338	0.109901	6.73176	0.031915	0.003112	0.18476	0.005985	0.003075	0.005201	0.019646	0.009955	0.005265
OTU000018	8357	47	29	17	32	30	6978	20	49	27	28	5	0	2	6	4	131	9	194	449	26	23	38	47	30	78	4	8	7	24	15	0.057887	0.030518	0.016663	0.032789	0.028181	8.86377	0.021637	0.047656	0.027234	0.030815	0.005187	0	0.001995	0.006149	0.004161	0.160855	0.012799	0.255347
OTU000019	8019	350	209	57	33	24	65	64	39	114	84	88	121	804	77	52	1030	605	52	80	75	22	40	121	757	130	54	110	97	258	2407	0.431072	0.219937	0.055869	0.033813	0.022545	0.082566	0.069239	0.03793	0.114987	0.092444	0.091292	0.147078	0.801987	0.078918	0.054095	1.26473	0.860365	0.068444
OTU000020	7390	158	292	310	186	264	244	250	259	359	161	265	369	220	234	208	169	248	567	376	377	78	98	193	283	178	407	93	244	58	242	0.194598	0.307281	0.303847	0.190584	0.24799	0.30994	0.270463	0.251897	0.362107	0.177184	0.274913	0.448529	0.219449	0.239828	0.21638	0.207515	0.352679	0.746298
OTU000021	3712	2	12	439	252	4	8	3	6	2	15	12	11	8	13	14	19	37	8	18	63	3	1	2	3	9	40	2676	17	7	8	0.002463	0.012628	0.430287	0.25821	0.003757	0.010162	0.003246	0.005835	0.002017	0.016508	0.012449	0.013371	0.00798	0.013324	0.014564	0.02333	0.052617	0.01053
OTU000022	3061	60	110	47	56	116	16	107	74	110	67	145	123	121	190	104	122	125	143	55	195	40	52	127	131	45	139	59	125	54	203	0.073898	0.115757	0.046067	0.05738	0.108965	0.020324	0.115758	0.07197	0.110952	0.073735	0.150424	0.14951	0.120697	0.194732	0.10819	0.149804	0.177761	0.18822
OTU000023	2352	17	6	6	82	4	5	6	2	109	3	21	10	24	9	9	10	15	10	3	21	3	12	3	5	2	59	1715	19	157	5	0.020938	0.006314	0.005881	0.084021	0.003757	0.006351	0.006491	0.001945	0.109943	0.003302	0.021786	0.012155	0.02394	0.009224	0.009363	0.012279	0.021331	0.013162
OTU000024	2041	260	59	5	17	29	44	16	32	26	14	67	88	26	74	17	60	19	19	2	10	60	178	358	58	127	18	12	9	10	327	0.320225	0.062088	0.004901	0.017419	0.027241	0.055891	0.01731	0.031122	0.026225	0.015407	0.069506	0.106966	0.025935	0.075843	0.017685	0.073674	0.02702	0.025008
OTU000025	1839	40	34	2	87	20	1	5	34	3	3	64	5	8	6	59	17	13	29	7	2	8	113	46	16	61	5	1094	17	8	32	0.049265	0.035779	0.00196	0.089144	0.018787	0.00127	0.005409	0.033067	0.003026	0.003302	0.066394	0.006078	0.00798	0.006149	0.061377	0.020874	0.018487	0.03817
OTU000026	1666	3	2	1	2	1	123	2	7	4	2	0	0	4	2	3	13	1	4	8	13	997	4	3	4	215	0	7	5	13	223	0.003695	0.002105	0.00098	0.002049	0.000939	0.15624	0.002164	0.006808	0.004035	0.002201	0	0	0.00399	0.00205	0.003121	0.015963	0.001422	0.005265
OTU000027	1651	5	20	13	54	5	131	49	5	5	1	6	3	15	6	359	11	8	7	18	839	1	7	4	6	5	11	35	7	14	1	0.006158	0.021047	0.012742	0.055331	0.004697	0.166402	0.053011	0.004863	0.005043	0.001101	0.006224	0.003647	0.014962	0.006149	0.373464	0.013507	0.011377	0.009214
OTU000028	1560	66	24	13	85	63	10	14	52	5	13	175	13	27	61	60	25	70	165	13	5	43	61	15	204	152	10	17	12	23	64	0.081288	0.025256	0.012742	0.087095	0.059179	0.012702	0.015146	0.050574	0.005043	0.014307	0.181547	0.015802	0.026932	0.062519	0.062417	0.030697	0.099546	0.217177
OTU000029	1462	30	33	73	63	41	13	119	38	126	113	27	33	59	17	9	98	52	44	17	61	46	9	57	21	20	87	33	33	60	30	0.036949	0.034727	0.071551	0.064552	0.038514	0.016513	0.128741	0.036958	0.12709	0.124359	0.02801	0.040112	0.058852	0.017423	0.009363	0.120334	0.073949	0.057914
OTU000030	1346	43	106	61	53	19	5	3	0	1	5	2	5	6	4	6	12	8	19	4	5	0	1	1	3	4	4	946	16	0	4	0.05296	0.111547	0.059789	0.054306	0.017848	0.006351	0.003246	0	0.001009	0.005503	0.002075	0.006078	0.005985	0.0041	0.006242	0.014735	0.011377	0.025008
OTU000031	1326	4	6	6	8	8	9	4	8	31	8	1	1	1	0	0	5	29	8	5	7	113	21	5	584	21	23	161	95	113	41	0.004927	0.006314	0.005881	0.008197	0.007515	0.011432	0.004327	0.007781	0.031268	0.008804	0.001037	0.001216	0.000997	0	0	0.006139	0.041241	0.01053
OTU000032	1170	3	6	0	1	4	10	202	163	345	364	6	7	12	0	0	0	0	2	2	2	6	5	2	1	21	0	0	2	4	0	0.003695	0.006314	0	0.001025	0.003757	0.012702	0.218534	0.158529	0.347986	0.40059	0.006224	0.008509	0.01197	0	0	0	0	0.002632
OTU000033	1157	9	7	267	9	5	79	3	4	10	7	0	84	1	7	0	2	8	0	2	1	3	4	8	3	4	11	23	12	515	69	0.011085	0.007366	0.261701	0.009222	0.004697	0.100349	0.003246	0.00389	0.010087	0.007704	0	0.102104	0.000997	0.007174	0	0.002456	0.011377	0
OTU000034	1064	125	7	10	29	36	6	16	21	15	3	27	39	5	62	4	40	13	33	2	23	17	171	47	17	37	86	6	36	2	129	0.153954	0.007366	0.009802	0.029715	0.033817	0.007621	0.01731	0.020424	0.01513	0.003302	0.02801	0.047405	0.004987	0.063544	0.004161	0.049116	0.018487	0.043435
OTU000035	984	59	5	27	372	313	16	3	3	2	4	1	1	0	3	2	13	2	1	0	16	3	7	3	5	49	1	27	14	0	32	0.072666	0.005262	0.026464	0.381167	0.294018	0.020324	0.003246	0.002918	0.002017	0.004402	0.001037	0.001216	0	0.003075	0.002081	0.015963	0.002844	0.001316
OTU000036	813	0	0	0	0	15	0	0	0	0	0	3	1	1	0	1	1	0	3	2	1	0	0	0	0	0	1	2	782	0	0	0	0	0	0	0.01409	0	0	0	0	0	0.003112	0.001216	0.000997	0	0.00104	0.001228	0	0.003949
OTU000037	809	2	36	7	2	582	0	5	5	1	2	0	0	0	0	4	0	60	0	0	1	2	1	2	7	3	23	4	60	0	0	0.002463	0.037884	0.006861	0.002049	0.546705	0	0.005409	0.004863	0.001009	0.002201	0	0	0	0	0.004161	0	0.085325	0
OTU000038	588	4	2	4	1	345	60	89	1	0	0	1	0	8	0	0	2	0	1	0	3	13	1	5	5	5	0	2	5	0	31	0.004927	0.002105	0.003921	0.001025	0.324078	0.076215	0.096285	0.000973	0	0	0.001037	0	0.00798	0	0	0.002456	0	0.001316
OTU000039	562	0	0	3	0	4	4	1	2	0	1	0	0	0	0	0	0	1	0	0	1	520	5	2	2	2	2	0	2	3	7	0	0	0.00294	0	0.003757	0.005081	0.001082	0.001945	0	0.001101	0	0	0	0	0	0	0.001422	0
OTU000040	545	8	10	22	24	40	29	5	5	11	0	9	3	24	8	13	6	11	3	5	101	7	64	5	7	47	3	32	32	11	0	0.009853	0.010523	0.021563	0.024591	0.037574	0.036837	0.005409	0.004863	0.011095	0	0.009337	0.003647	0.02394	0.008199	0.013524	0.007367	0.015643	0.003949
OTU000041	513	12	3	11	17	1	346	11	17	3	21	0	0	0	0	5	1	1	0	7	4	0	9	17	1	0	2	6	10	6	2	0.01478	0.003157	0.010782	0.017419	0.000939	0.439505	0.0119	0.016534	0.003026	0.023111	0	0	0	0	0.005201	0.001228	0.001422	0
OTU000042	495	0	4	2	4	1	232	13	1	0	1	0	0	1	1	0	1	1	0	13	0	0	1	1	3	0	1	1	0	211	2	0	0.004209	0.00196	0.004099	0.000939	0.294697	0.014064	0.000973	0	0.001101	0	0	0.000997	0.001025	0	0.001228	0.001422	0
OTU000043	470	7	19	133	6	5	5	6	0	4	2	29	112	6	17	7	18	8	22	9	17	3	2	6	3	2	2	17	1	1	1	0.008621	0.019994	0.13036	0.006148	0.004697	0.006351	0.006491	0	0.004035	0.002201	0.030085	0.136139	0.005985	0.017423	0.007282	0.022102	0.011377	0.028957
OTU000044	444	3	10	15	14	17	19	5	6	2	7	11	4	27	12	9	7	7	5	15	64	1	39	2	10	29	3	45	38	18	0	0.003695	0.010523	0.014702	0.014345	0.015969	0.024135	0.005409	0.005835	0.002017	0.007704	0.011411	0.004862	0.026932	0.012299	0.009363	0.008595	0.009955	0.006581
OTU000045	418	4	3	10	3	1	12	0	4	4	6	23	12	41	10	11	114	51	5	7	3	6	6	5	8	3	31	24	3	4	4	0.004927	0.003157	0.009802	0.003074	0.000939	0.015243	0	0.00389	0.004035	0.006603	0.02386	0.014586	0.040897	0.010249	0.011443	0.13998	0.072527	0.006581
OTU000046	401	19	1	0	0	0	8	0	0	0	0	4	0	2	3	1	0	0	3	345	2	0	0	0	0	2	6	2	1	0	2	0.023401	0.001052	0	0	0	0.010162	0	0	0	0	0.00415	0	0.001995	0.003075	0.00104	0	0	0.003949
OTU000047	380	11	2	51	18	25	132	1	18	4	2	4	3	1	3	5	2	0	0	5	3	3	0	0	1	0	14	12	51	7	2	0.013548	0.002105	0.049988	0.018444	0.023484	0.167672	0.001082	0.017506	0.004035	0.002201	0.00415	0.003647	0.000997	0.003075	0.005201	0.002456	0	0
OTU000048	377	3	1	0	14	2	9	15	7	3	0	1	5	6	6	7	1	1	3	2	204	3	3	2	1	9	3	1	7	1	57	0.003695	0.001052	0	0.014345	0.001879	0.011432	0.016228	0.006808	0.003026	0	0.001037	0.006078	0.005985	0.006149	0.007282	0.001228	0.001422	0.003949
OTU000049	365	1	8	7	2	18	17	3	8	7	6	2	4	2	8	4	13	21	7	8	46	7	67	4	6	34	6	21	3	25	0	0.001232	0.008419	0.006861	0.002049	0.016908	0.021594	0.003246	0.007781	0.007061	0.006603	0.002075	0.004862	0.001995	0.008199	0.004161	0.015963	0.029864	0.009214
OTU000050	332	9	2	8	9	17	7	4	11	6	3	7	2	13	9	6	4	4	3	12	69	4	39	1	4	23	7	20	19	10	0	0.011085	0.002105	0.007841	0.009222	0.015969	0.008892	0.004327	0.010698	0.006052	0.003302	0.007262	0.002431	0.012967	0.009224	0.006242	0.004912	0.005688	0.003949
OTU000051	316	0	2	0	4	5	224	0	0	1	2	0	0	0	0	0	1	0	0	9	0	2	2	6	0	0	0	1	0	0	57	0	0.002105	0	0.004099	0.004697	0.284535	0	0	0.001009	0.002201	0	0	0	0	0	0.001228	0	0
OTU000052	303	21	3	5	16	5	29	3	7	5	8	17	5	5	4	4	3	0	2	3	0	8	41	8	15	8	5	3	9	3	58	0.025864	0.003157	0.004901	0.016394	0.004697	0.036837	0.003246	0.006808	0.005043	0.008804	0.017636	0.006078	0.004987	0.0041	0.004161	0.003684	0	0.002632
OTU000053	301	1	1	5	4	4	18	44	133	3	38	3	1	2	0	0	3	2	1	1	2	1	7	3	3	5	0	9	5	2	0	0.001232	0.001052	0.004901	0.004099	0.003757	0.022864	0.047602	0.129352	0.003026	0.04182	0.003112	0.001216	0.001995	0	0	0.003684	0.002844	0.001316
OTU000054	281	0	2	0	0	0	5	0	0	3	0	11	5	6	2	3	4	1	90	97	3	3	10	0	0	8	6	4	6	8	4	0	0.002105	0	0	0	0.006351	0	0	0.003026	0	0.011411	0.006078	0.005985	0.00205	0.003121	0.004912	0.001422	0.11846
OTU000055	275	1	0	0	0	2	242	2	1	1	0	0	1	1	0	0	2	0	0	8	2	0	2	0	2	1	0	3	1	3	0	0.001232	0	0	0	0.001879	0.307399	0.002164	0.000973	0.001009	0	0	0.001216	0.000997	0	0	0.002456	0	0
OTU000056	264	1	0	10	3	9	19	2	3	0	3	1	0	1	0	0	4	10	5	90	28	2	21	0	0	26	1	13	6	6	0	0.001232	0	0.009802	0.003074	0.008454	0.024135	0.002164	0.002918	0	0.003302	0.001037	0	0.000997	0	0	0.004912	0.014221	0.006581
OTU000057	254	0	4	1	3	1	223	1	0	0	0	0	0	0	0	0	0	0	0	12	3	2	0	1	1	1	0	0	0	1	0	0	0.004209	0.00098	0.003074	0.000939	0.283265	0.001082	0	0	0	0	0	0	0	0	0	0	0
OTU000058	245	4	8	3	5	19	0	7	5	13	3	15	10	9	14	7	7	1	9	0	3	0	1	11	3	2	18	30	12	12	14	0.004927	0.008419	0.00294	0.005123	0.017848	0	0.007573	0.004863	0.013113	0.003302	0.015561	0.012155	0.008977	0.014349	0.007282	0.008595	0.001422	0.011846
OTU000059	241	2	1	7	3	1	83	19	7	0	0	0	2	2	1	0	4	0	3	0	4	1	6	2	20	17	0	3	2	6	45	0.002463	0.001052	0.006861	0.003074	0.000939	0.10543	0.020555	0.006808	0	0	0	0.002431	0.001995	0.001025	0	0.004912	0	0.003949
OTU000060	235	0	6	4	3	6	31	20	10	4	0	2	1	13	14	2	29	8	1	16	28	2	5	6	8	1	0	4	7	3	1	0	0.006314	0.003921	0.003074	0.005636	0.039378	0.021637	0.009726	0.004035	0	0.002075	0.001216	0.012967	0.014349	0.002081	0.035609	0.011377	0.001316
OTU000061	205	3	11	5	4	4	5	3	4	25	1	1	10	1	1	0	1	5	0	0	0	1	1	5	102	7	0	3	0	2	0	0.003695	0.011576	0.004901	0.004099	0.003757	0.006351	0.003246	0.00389	0.025216	0.001101	0.001037	0.012155	0.000997	0.001025	0	0.001228	0.00711	0
OTU000062	204	4	2	26	10	6	6	6	1	5	2	0	2	4	3	3	3	1	3	5	31	2	22	4	2	22	4	20	3	2	0	0.004927	0.002105	0.025484	0.010246	0.005636	0.007621	0.006491	0.000973	0.005043	0.002201	0	0.002431	0.00399	0.003075	0.003121	0.003684	0.001422	0.003949
OTU000063	189	8	9	5	6	4	0	2	4	3	0	15	3	1	25	5	13	1	19	2	8	1	1	23	0	17	5	1	0	5	3	0.009853	0.009471	0.004901	0.006148	0.003757	0	0.002164	0.00389	0.003026	0	0.015561	0.003647	0.000997	0.025623	0.005201	0.015963	0.001422	0.025008
OTU000064	187	9	1	2	10	2	2	15	2	3	10	10	10	8	9	2	10	2	4	3	7	11	5	11	5	3	4	4	13	8	2	0.011085	0.001052	0.00196	0.010246	0.001879	0.00254	0.016228	0.001945	0.003026	0.011005	0.010374	0.012155	0.00798	0.009224	0.002081	0.012279	0.002844	0.005265
OTU000065	174	0	1	1	0	1	0	2	0	1	0	18	16	11	28	8	0	0	1	1	22	0	3	0	0	0	14	38	8	0	0	0	0.001052	0.00098	0	0.000939	0	0.002164	0	0.001009	0	0.018673	0.019448	0.010972	0.028697	0.008322	0	0	0.001316
OTU000066	166	0	0	4	0	0	1	0	0	0	0	0	0	0	0	3	3	0	0	2	42	0	2	0	0	0	48	34	7	13	7	0	0	0.003921	0	0	0.00127	0	0	0	0	0	0	0	0	0.003121	0.003684	0	0
OTU000067	161	0	1	6	7	10	9	0	4	3	5	4	2	3	3	5	1	1	1	6	11	0	27	3	2	11	1	20	13	2	0	0	0.001052	0.005881	0.007172	0.009394	0.011432	0	0.00389	0.003026	0.005503	0.00415	0.002431	0.002992	0.003075	0.005201	0.001228	0.001422	0.001316
OTU000068	159	0	2	2	8	8	0	4	1	0	2	3	0	7	3	1	2	3	0	2	20	4	19	5	9	17	0	21	8	8	0	0	0.002105	0.00196	0.008197	0.007515	0	0.004327	0.000973	0	0.002201	0.003112	0	0.006982	0.003075	0.00104	0.002456	0.004266	0
OTU000069	148	3	2	1	4	1	0	2	10	20	2	8	11	7	3	4	9	2	12	1	7	2	3	3	3	4	4	9	8	2	1	0.003695	0.002105	0.00098	0.004099	0.000939	0	0.002164	0.009726	0.020173	0.002201	0.008299	0.013371	0.006982	0.003075	0.004161	0.011051	0.002844	0.015795
OTU000070	141	1	0	0	0	2	1	0	0	0	0	3	0	0	11	0	8	4	5	2	2	0	1	0	0	3	47	9	5	1	36	0.001232	0	0	0	0.001879	0.00127	0	0	0	0	0.003112	0	0	0.011274	0	0.009823	0.005688	0.006581
OTU000071	127	1	0	1	4	1	0	0	1	1	1	3	9	16	1	1	0	0	1	0	1	13	0	1	3	1	0	66	1	0	0	0.001232	0	0.00098	0.004099	0.000939	0	0	0.000973	0.001009	0.001101	0.003112	0.01094	0.01596	0.001025	0.00104	0	0	0.001316
OTU000072	126	0	0	0	3	1	0	0	0	0	1	0	0	0	2	0	20	1	0	0	3	1	0	0	0	0	7	3	9	70	5	0	0	0	0.003074	0.000939	0	0	0	0	0.001101	0	0	0	0.00205	0	0.024558	0.001422	0
OTU000073	118	0	1	0	9	5	9	0	2	2	0	3	3	6	10	5	3	6	6	11	6	1	1	1	4	4	6	4	2	4	4	0	0.001052	0	0.009222	0.004697	0.011432	0	0.001945	0.002017	0	0.003112	0.003647	0.005985	0.010249	0.005201	0.003684	0.008533	0.007897
OTU000074	113	6	0	0	1	3	1	3	2	3	4	1	7	1	3	0	3	2	3	4	8	3	21	1	1	19	0	7	3	2	1	0.00739	0	0	0.001025	0.002818	0.00127	0.003246	0.001945	0.003026	0.004402	0.001037	0.008509	0.000997	0.003075	0	0.003684	0.002844	0.003949
OTU000075	110	0	1	5	1	1	10	2	3	0	1	1	0	5	1	2	1	1	0	3	22	0	10	0	5	14	0	12	9	0	0	0	0.001052	0.004901	0.001025	0.000939	0.012702	0.002164	0.002918	0	0.001101	0.001037	0	0.004987	0.001025	0.002081	0.001228	0.001422	0
OTU000076	109	0	5	10	8	2	7	0	1	7	2	1	4	3	6	5	1	4	1	1	1	3	2	10	4	2	3	3	10	0	3	0	0.005262	0.009802	0.008197	0.001879	0.008892	0	0.000973	0.007061	0.002201	0.001037	0.004862	0.002992	0.006149	0.005201	0.001228	0.005688	0.001316
OTU000077	108	1	1	1	2	2	6	0	5	2	2	1	0	1	1	1	1	1	0	5	8	1	30	1	3	8	1	11	9	2	1	0.001232	0.001052	0.00098	0.002049	0.001879	0.007621	0	0.004863	0.002017	0.002201	0.001037	0	0.000997	0.001025	0.00104	0.001228	0.001422	0
OTU000078	105	2	0	2	7	4	7	0	7	0	4	0	2	5	0	3	1	1	0	5	15	1	7	0	0	7	0	13	5	6	1	0.002463	0	0.00196	0.007172	0.003757	0.008892	0	0.006808	0	0.004402	0	0.002431	0.004987	0	0.003121	0.001228	0.001422	0
OTU000079	104	1	4	1	1	2	1	0	2	0	1	6	6	1	7	2	2	2	9	9	0	9	1	7	15	10	0	2	0	0	3	0.001232	0.004209	0.00098	0.001025	0.001879	0.00127	0	0.001945	0	0.001101	0.006224	0.007293	0.000997	0.007174	0.002081	0.002456	0.002844	0.011846
OTU000080	98	0	1	2	6	3	5	2	1	0	0	2	1	8	2	2	0	4	2	2	6	1	14	0	2	7	0	16	8	1	0	0	0.001052	0.00196	0.006148	0.002818	0.006351	0.002164	0.000973	0	0	0.002075	0.001216	0.00798	0.00205	0.002081	0	0.005688	0.002632
OTU000081	97	6	1	24	1	1	0	20	15	3	0	0	0	0	0	3	0	2	5	1	5	1	2	0	0	4	1	0	0	0	2	0.00739	0.001052	0.023524	0.001025	0.000939	0	0.021637	0.014589	0.003026	0	0	0	0	0	0.003121	0	0.002844	0.006581
OTU000082	92	0	1	0	0	1	0	1	0	0	0	2	0	1	1	1	0	2	1	0	2	74	2	0	2	0	1	0	0	0	0	0	0.001052	0	0	0.000939	0	0.001082	0	0	0	0.002075	0	0.000997	0.001025	0.00104	0	0.002844	0.001316
OTU000083	89	0	0	0	0	0	3	0	1	0	0	1	0	0	1	0	76	0	0	1	1	0	0	5	0	0	0	0	0	0	0	0	0	0	0	0	0.003811	0	0.000973	0	0	0.001037	0	0	0.001025	0	0.09332	0	0
OTU000084	83	0	40	2	36	1	0	0	0	0	0	0	0	0	0	1	0	0	0	0	0	0	0	0	0	0	0	3	0	0	0	0	0.042093	0.00196	0.036887	0.000939	0	0	0	0	0	0	0	0	0	0.00104	0	0	0
OTU000085	81	0	0	3	2	3	4	1	3	1	0	1	0	5	1	0	0	0	0	7	4	0	13	0	0	18	0	11	2	2	0	0	0	0.00294	0.002049	0.002818	0.005081	0.001082	0.002918	0.001009	0	0.001037	0	0.004987	0.001025	0	0	0	0
OTU000086	77	0	2	5	1	1	6	1	0	6	3	0	8	0	1	0	0	0	0	3	1	0	0	0	4	1	1	0	3	19	11	0	0.002105	0.004901	0.001025	0.000939	0.007621	0.001082	0	0.006052	0.003302	0	0.009724	0	0.001025	0	0	0	0
OTU000087	77	1	1	0	2	0	2	0	11	1	0	2	0	0	1	0	28	2	0	2	10	0	2	3	1	1	1	4	1	0	1	0.001232	0.001052	0	0.002049	0	0.00254	0	0.010698	0.001009	0	0.002075	0	0	0.001025	0	0.034381	0.002844	0
OTU000088	76	1	1	0	2	3	5	0	1	0	2	0	1	6	0	2	1	3	0	4	9	0	13	0	4	7	0	9	1	1	0	0.001232	0.001052	0	0.002049	0.002818	0.006351	0	0.000973	0	0.002201	0	0.001216	0.005985	0	0.002081	0.001228	0.004266	0
OTU000089	68	3	6	8	4	6	3	0	0	0	0	0	0	1	0	0	0	7	1	1	0	0	5	3	1	19	0	0	0	0	0	0.003695	0.006314	0.007841	0.004099	0.005636	0.003811	0	0	0	0	0	0	0.000997	0	0	0	0.009955	0.001316
OTU000090	65	0	0	3	1	1	14	1	0	1	1	0	1	0	0	0	0	0	0	0	1	0	1	2	15	0	0	0	0	2	21	0	0	0.00294	0.001025	0.000939	0.017783	0.001082	0	0.001009	0.001101	0	0.001216	0	0	0	0	0	0
OTU000091	65	0	0	0	2	6	5	2	2	0	0	0	0	3	0	1	0	2	3	3	3	0	7	1	1	11	1	6	3	3	0	0	0	0	0.002049	0.005636	0.006351	0.002164	0.001945	0	0	0	0	0.002992	0	0.00104	0	0.002844	0.003949
OTU000092	63	3	2	0	0	4	0	1	4	5	5	0	1	7	2	0	0	4	1	3	4	0	4	0	3	0	0	2	3	2	3	0.003695	0.002105	0	0	0.003757	0	0.001082	0.00389	0.005043	0.005503	0	0.001216	0.006982	0.00205	0	0	0.005688	0.001316
OTU000093	61	0	12	2	28	1	0	0	1	0	0	5	4	0	0	2	0	0	0	0	1	0	0	0	0	0	3	1	1	0	0	0	0.012628	0.00196	0.02869	0.000939	0	0	0.000973	0	0	0.005187	0.004862	0	0	0.002081	0	0	0
OTU000094	61	3	2	5	0	1	1	2	7	3	1	0	1	2	1	2	0	2	1	0	5	1	3	2	3	3	0	4	2	2	2	0.003695	0.002105	0.004901	0	0.000939	0.00127	0.002164	0.006808	0.003026	0.001101	0	0.001216	0.001995	0.001025	0.002081	0	0.002844	0.001316
OTU000095	61	0	0	0	0	1	0	1	2	3	2	0	1	1	0	1	31	4	2	1	6	0	0	0	0	4	0	1	0	0	0	0	0	0	0	0.000939	0	0.001082	0.001945	0.003026	0.002201	0	0.001216	0.000997	0	0.00104	0.038065	0.005688	0.002632
OTU000096	59	1	0	0	0	0	25	0	0	0	0	0	1	0	3	0	0	1	0	1	2	0	2	3	0	18	0	2	0	0	0	0.001232	0	0	0	0	0.031756	0	0	0	0	0	0.001216	0	0.003075	0	0	0.001422	0
OTU000097	59	0	0	12	0	0	5	2	4	1	1	0	0	0	0	0	1	4	0	0	0	0	0	0	0	0	9	15	3	2	0	0	0	0.011762	0	0	0.006351	0.002164	0.00389	0.001009	0.001101	0	0	0	0	0	0.001228	0.005688	0
OTU000098	59	0	0	0	0	0	0	0	0	0	1	0	0	0	0	0	4	29	6	1	1	9	0	1	3	0	1	1	2	0	0	0	0	0	0	0	0	0	0	0	0.001101	0	0	0	0	0	0.004912	0.041241	0.007897
OTU000099	57	3	3	0	4	4	0	1	1	4	2	2	0	0	4	3	2	0	1	3	2	3	0	4	2	5	0	0	2	2	0	0.003695	0.003157	0	0.004099	0.003757	0	0.001082	0.000973	0.004035	0.002201	0.002075	0	0	0.0041	0.003121	0.002456	0	0.001316
OTU000100	55	0	0	4	1	0	1	2	3	0	0	0	1	0	0	0	1	0	0	0	0	0	0	1	1	1	0	0	0	2	37	0	0	0.003921	0.001025	0	0.00127	0.002164	0.002918	0	0	0	0.001216	0	0	0	0.001228	0	0
OTU000101	52	0	0	0	0	0	0	28	20	2	0	0	0	0	0	0	0	0	0	0	2	0	0	0	0	0	0	0	0	0	0	0	0	0	0	0	0	0.030292	0.019451	0.002017	0	0	0	0	0	0	0	0	0
OTU000102	52	2	1	3	0	0	3	1	5	1	4	0	5	1	1	1	1	2	0	2	0	5	1	0	7	0	1	0	0	5	0	0.002463	0.001052	0.00294	0	0	0.003811	0.001082	0.004863	0.001009	0.004402	0	0.006078	0.000997	0.001025	0.00104	0.001228	0.002844	0
OTU000103	51	0	4	2	0	4	0	1	0	0	0	0	0	0	0	0	1	5	1	22	1	0	2	0	0	3	0	1	1	3	0	0	0.004209	0.00196	0	0.003757	0	0.001082	0	0	0	0	0	0	0	0	0.001228	0.00711	0.001316
OTU000104	50	9	0	0	2	2	1	0	0	0	0	2	0	0	0	0	0	0	3	2	0	2	18	3	2	3	0	0	0	0	1	0.011085	0	0	0.002049	0.001879	0.00127	0	0	0	0	0.002075	0	0	0	0	0	0	0.003949
OTU000105	50	0	2	0	0	0	0	1	0	0	0	4	4	0	3	1	1	0	2	1	13	0	0	0	0	0	9	2	7	0	0	0	0.002105	0	0	0	0	0.001082	0	0	0	0.00415	0.004862	0	0.003075	0.00104	0.001228	0	0.002632
OTU000106	50	0	0	0	0	0	0	2	1	2	4	0	0	1	0	0	0	0	0	0	1	7	7	6	7	8	0	0	4	0	0	0	0	0	0	0	0	0.002164	0.000973	0.002017	0.004402	0	0	0.000997	0	0	0	0	0
OTU000107	50	0	0	0	0	0	0	0	0	0	0	0	0	0	0	0	0	0	0	0	0	1	0	0	49	0	0	0	0	0	0	0	0	0	0	0	0	0	0	0	0	0	0	0	0	0	0	0	0
OTU000108	49	2	0	2	0	1	19	0	0	0	0	0	0	0	0	0	0	0	0	3	1	3	0	0	1	1	1	3	0	12	0	0.002463	0	0.00196	0	0.000939	0.024135	0	0	0	0	0	0	0	0	0	0	0	0
OTU000109	48	1	0	0	1	1	0	0	0	0	0	6	6	2	2	3	0	0	1	0	11	2	0	0	0	1	4	4	2	1	0	0.001232	0	0	0.001025	0.000939	0	0	0	0	0	0.006224	0.007293	0.001995	0.00205	0.003121	0	0	0.001316
OTU000110	48	4	4	9	1	6	1	0	0	0	0	0	0	5	0	2	0	0	0	0	0	3	0	0	3	0	6	0	0	4	0	0.004927	0.004209	0.008821	0.001025	0.005636	0.00127	0	0	0	0	0	0	0.004987	0	0.002081	0	0	0
OTU000111	47	0	0	0	7	0	2	0	0	0	1	0	0	0	0	1	0	0	0	28	0	0	5	0	0	0	0	3	0	0	0	0	0	0	0.007172	0	0.00254	0	0	0	0.001101	0	0	0	0	0.00104	0	0	0
OTU000112	46	1	0	2	1	1	31	0	0	0	0	0	0	1	0	1	0	0	0	2	0	0	0	4	0	0	0	0	0	0	2	0.001232	0	0.00196	0.001025	0.000939	0.039378	0	0	0	0	0	0	0.000997	0	0.00104	0	0	0
OTU000113	45	0	11	0	5	3	2	0	2	8	0	0	0	1	0	0	0	1	0	0	1	1	0	1	8	1	0	0	0	0	0	0	0.011576	0	0.005123	0.002818	0.00254	0	0.001945	0.008069	0	0	0	0.000997	0	0	0	0.001422	0
OTU000114	44	0	0	0	1	1	1	1	0	1	0	3	0	0	0	0	0	5	0	17	12	0	0	1	0	1	0	0	0	0	0	0	0	0	0.001025	0.000939	0.00127	0.001082	0	0.001009	0	0.003112	0	0	0	0	0	0.00711	0
OTU000115	44	0	0	0	1	0	1	0	4	0	0	7	7	0	3	0	3	0	0	0	0	1	0	1	0	0	1	3	8	0	4	0	0	0	0.001025	0	0.00127	0	0.00389	0	0	0.007262	0.008509	0	0.003075	0	0.003684	0	0
OTU000116	42	0	0	0	0	2	0	0	0	0	1	0	0	0	0	0	0	0	1	0	5	9	0	5	5	4	0	0	9	0	1	0	0	0	0	0.001879	0	0	0	0	0.001101	0	0	0	0	0	0	0	0.001316
OTU000117	41	3	0	2	0	2	0	4	0	1	0	7	1	1	1	1	3	0	0	0	1	0	0	4	0	0	1	0	1	2	6	0.003695	0	0.00196	0	0.001879	0	0.004327	0	0.001009	0	0.007262	0.001216	0.000997	0.001025	0.00104	0.003684	0	0
OTU000118	41	0	0	0	0	0	0	0	1	0	0	0	0	0	0	1	19	3	0	0	1	0	0	1	0	7	3	0	2	0	3	0	0	0	0	0	0	0	0.000973	0	0	0	0	0	0	0.00104	0.02333	0.004266	0
OTU000119	41	2	1	5	1	1	2	0	4	0	1	2	0	2	0	0	0	0	0	3	0	0	1	0	0	1	2	2	6	5	0	0.002463	0.001052	0.004901	0.001025	0.000939	0.00254	0	0.00389	0	0.001101	0.002075	0	0.001995	0	0	0	0	0
OTU000120	40	2	0	0	3	6	2	0	2	0	0	2	1	0	1	0	4	1	1	2	0	2	0	0	0	4	0	2	1	4	0	0.002463	0	0	0.003074	0.005636	0.00254	0	0.001945	0	0	0.002075	0.001216	0	0.001025	0	0.004912	0.001422	0.001316
OTU000121	40	0	0	1	1	4	1	0	0	0	0	0	0	1	3	1	1	14	1	1	2	1	2	0	0	1	2	2	1	0	0	0	0	0.00098	0.001025	0.003757	0.00127	0	0	0	0	0	0	0.000997	0.003075	0.00104	0.001228	0.019909	0.001316
OTU000122	39	0	1	2	6	5	6	1	0	0	1	0	0	4	0	4	0	0	0	0	0	0	0	1	0	0	2	4	2	0	0	0	0.001052	0.00196	0.006148	0.004697	0.007621	0.001082	0	0	0.001101	0	0	0.00399	0	0.004161	0	0	0
OTU000123	38	0	0	0	0	0	0	0	6	0	0	0	0	0	0	0	15	7	0	3	3	0	0	0	1	0	1	1	1	0	0	0	0	0	0	0	0	0	0.005835	0	0	0	0	0	0	0	0.018418	0.009955	0
OTU000124	37	0	6	2	1	0	8	0	0	1	1	0	0	0	0	0	0	0	0	0	0	2	0	1	0	0	6	7	1	0	1	0	0.006314	0.00196	0.001025	0	0.010162	0	0	0.001009	0.001101	0	0	0	0	0	0	0	0
OTU000125	37	0	2	1	0	7	4	6	0	1	0	0	1	0	1	0	0	1	2	1	2	1	2	0	0	1	3	1	0	0	0	0	0.002105	0.00098	0	0.006575	0.005081	0.006491	0	0.001009	0	0	0.001216	0	0.001025	0	0	0.001422	0.002632
OTU000126	37	0	0	1	0	0	0	0	0	0	0	1	0	3	1	0	1	0	0	1	5	0	2	1	2	8	0	5	2	4	0	0	0	0.00098	0	0	0	0	0	0	0	0.001037	0	0.002992	0.001025	0	0.001228	0	0
OTU000127	36	0	1	1	3	2	1	2	0	0	0	2	1	0	1	0	0	0	0	1	0	0	0	12	2	6	0	0	1	0	0	0	0.001052	0.00098	0.003074	0.001879	0.00127	0.002164	0	0	0	0.002075	0.001216	0	0.001025	0	0	0	0
OTU000128	33	2	3	0	4	3	0	0	2	2	0	3	2	3	0	5	0	0	0	0	0	0	1	0	0	0	0	1	2	0	0	0.002463	0.003157	0	0.004099	0.002818	0	0	0.001945	0.002017	0	0.003112	0.002431	0.002992	0	0.005201	0	0	0
OTU000129	31	4	9	1	1	6	0	0	0	0	3	0	0	0	0	0	1	0	0	0	0	0	5	1	0	0	0	0	0	0	0	0.004927	0.009471	0.00098	0.001025	0.005636	0	0	0	0	0.003302	0	0	0	0	0	0.001228	0	0
OTU000130	31	1	0	2	0	0	0	1	0	0	0	0	0	1	1	4	0	1	0	0	10	0	0	1	0	4	0	2	3	0	0	0.001232	0	0.00196	0	0	0	0.001082	0	0	0	0	0	0.000997	0.001025	0.004161	0	0.001422	0
OTU000131	31	2	0	0	1	0	0	3	0	0	1	0	1	3	5	1	1	0	4	1	1	0	0	3	1	1	1	0	0	0	1	0.002463	0	0	0.001025	0	0	0.003246	0	0	0.001101	0	0.001216	0.002992	0.005125	0.00104	0.001228	0	0.005265
OTU000132	29	0	0	2	0	1	0	2	0	3	3	3	1	3	1	0	0	1	0	0	0	0	1	2	1	1	0	0	3	0	1	0	0	0.00196	0	0.000939	0	0.002164	0	0.003026	0.003302	0.003112	0.001216	0.002992	0.001025	0	0	0.001422	0
OTU000133	29	0	0	0	0	0	1	2	0	3	3	1	0	2	0	0	1	1	1	0	2	0	1	0	0	0	6	0	4	0	1	0	0	0	0	0	0.00127	0.002164	0	0.003026	0.003302	0.001037	0	0.001995	0	0	0.001228	0.001422	0.001316
OTU000134	29	0	0	23	0	4	0	0	0	0	0	0	0	0	0	0	0	0	0	0	0	0	0	0	0	0	1	1	0	0	0	0	0	0.022543	0	0.003757	0	0	0	0	0	0	0	0	0	0	0	0	0
OTU000135	29	0	0	0	1	2	0	0	1	0	0	0	0	2	1	0	0	3	0	0	1	1	0	0	0	0	0	0	0	17	0	0	0	0	0.001025	0.001879	0	0	0.000973	0	0	0	0	0.001995	0.001025	0	0	0.004266	0
OTU000136	26	0	0	0	0	0	0	0	0	0	0	0	0	0	0	0	0	0	0	0	0	0	0	0	0	0	0	0	26	0	0	0	0	0	0	0	0	0	0	0	0	0	0	0	0	0	0	0	0
OTU000137	26	2	1	1	0	2	0	0	1	3	0	0	0	2	0	0	0	0	2	1	2	2	0	0	1	3	0	0	0	2	1	0.002463	0.001052	0.00098	0	0.001879	0	0	0.000973	0.003026	0	0	0	0.001995	0	0	0	0	0.002632
OTU000138	25	2	2	0	6	0	0	1	0	0	0	0	1	0	0	2	0	0	1	0	6	1	0	0	0	2	0	0	1	0	0	0.002463	0.002105	0	0.006148	0	0	0.001082	0	0	0	0	0.001216	0	0	0.002081	0	0	0.001316
OTU000139	25	1	0	0	0	0	22	0	0	0	0	1	0	0	0	0	0	0	0	0	0	0	0	0	0	0	0	1	0	0	0	0.001232	0	0	0	0	0.027945	0	0	0	0	0.001037	0	0	0	0	0	0	0
OTU000140	25	0	1	0	1	0	3	0	1	0	1	0	0	0	0	0	0	1	1	0	1	0	0	0	0	14	1	0	0	0	0	0	0.001052	0	0.001025	0	0.003811	0	0.000973	0	0.001101	0	0	0	0	0	0	0.001422	0.001316
OTU000141	24	1	1	2	0	2	0	0	0	0	0	0	0	0	0	0	0	0	0	0	1	1	0	0	1	0	11	0	1	3	0	0.001232	0.001052	0.00196	0	0.001879	0	0	0	0	0	0	0	0	0	0	0	0	0
OTU000142	24	0	1	4	0	0	8	0	0	0	0	0	0	1	0	0	0	0	0	0	3	0	0	1	1	2	1	0	2	0	0	0	0.001052	0.003921	0	0	0.010162	0	0	0	0	0	0	0.000997	0	0	0	0	0
OTU000143	24	0	0	0	0	0	0	0	0	0	0	0	2	2	1	4	0	0	0	0	0	0	0	0	0	0	5	3	7	0	0	0	0	0	0	0	0	0	0	0	0	0	0.002431	0.001995	0.001025	0.004161	0	0	0
OTU000144	24	0	0	1	0	0	10	2	0	0	1	0	0	2	1	0	0	0	1	2	1	0	0	1	0	1	0	1	0	0	0	0	0	0.00098	0	0	0.012702	0.002164	0	0	0.001101	0	0	0.001995	0.001025	0	0	0	0.001316
OTU000145	24	0	0	0	0	0	0	0	2	0	1	0	0	0	0	0	16	0	0	0	5	0	0	0	0	0	0	0	0	0	0	0	0	0	0	0	0	0	0.001945	0	0.001101	0	0	0	0	0	0.019646	0	0
OTU000146	23	0	2	2	0	0	0	0	2	1	1	0	0	0	0	0	0	0	1	0	1	0	0	5	2	5	1	0	0	0	0	0	0.002105	0.00196	0	0	0	0	0.001945	0.001009	0.001101	0	0	0	0	0	0	0	0.001316
OTU000147	23	1	2	0	1	0	4	0	0	1	0	0	0	0	0	0	0	0	2	0	0	0	1	1	4	3	0	0	0	0	3	0.001232	0.002105	0	0.001025	0	0.005081	0	0	0.001009	0	0	0	0	0	0	0	0	0.002632
OTU000148	23	0	0	0	0	0	16	0	0	0	0	0	0	0	0	2	0	0	0	0	0	0	0	1	0	0	1	3	0	0	0	0	0	0	0	0	0.020324	0	0	0	0	0	0	0	0	0.002081	0	0	0
OTU000149	22	6	0	1	2	0	0	0	1	0	1	1	0	0	1	0	1	0	0	0	0	0	4	1	0	2	0	1	0	0	0	0.00739	0	0.00098	0.002049	0	0	0	0.000973	0	0.001101	0.001037	0	0	0.001025	0	0.001228	0	0
OTU000150	22	1	0	0	0	14	0	0	0	0	0	0	0	0	0	0	0	0	0	0	0	1	2	0	0	4	0	0	0	0	0	0.001232	0	0	0	0.013151	0	0	0	0	0	0	0	0	0	0	0	0	0
OTU000151	22	0	0	0	0	0	0	0	0	0	0	0	0	0	4	0	0	0	0	2	4	0	0	1	0	0	1	10	0	0	0	0	0	0	0	0	0	0	0	0	0	0	0	0	0.0041	0	0	0	0
OTU000152	20	0	0	0	0	0	0	0	0	0	0	1	1	11	1	0	0	1	1	0	1	0	0	0	0	0	2	0	1	0	0	0	0	0	0	0	0	0	0	0	0	0.001037	0.001216	0.010972	0.001025	0	0	0.001422	0.001316
OTU000153	20	1	0	1	0	1	1	1	0	0	0	1	1	1	3	0	0	3	0	1	2	0	0	0	0	0	0	1	2	0	0	0.001232	0	0.00098	0	0.000939	0.00127	0.001082	0	0	0	0.001037	0.001216	0.000997	0.003075	0	0	0.004266	0
OTU000154	20	2	0	2	1	0	0	0	0	6	1	0	0	0	0	1	0	0	0	0	0	0	1	0	1	1	1	1	0	0	2	0.002463	0	0.00196	0.001025	0	0	0	0	0.006052	0.001101	0	0	0	0	0.00104	0	0	0
OTU000155	20	0	1	12	0	1	0	0	0	0	4	0	0	0	0	0	0	0	0	0	0	0	0	0	1	0	0	0	1	0	0	0	0.001052	0.011762	0	0.000939	0	0	0	0	0.004402	0	0	0	0	0	0	0	0
OTU000156	19	0	0	3	0	0	1	0	0	0	0	3	0	1	0	0	2	0	0	3	1	0	0	0	0	4	0	0	1	0	0	0	0	0.00294	0	0	0.00127	0	0	0	0	0.003112	0	0.000997	0	0	0.002456	0	0
OTU000157	19	2	0	0	0	0	2	2	2	0	0	0	0	0	4	0	1	2	1	2	0	0	0	0	0	1	0	0	0	0	0	0.002463	0	0	0	0	0.00254	0.002164	0.001945	0	0	0	0	0	0.0041	0	0.001228	0.002844	0.001316
OTU000158	19	0	0	0	0	0	0	0	0	0	0	0	5	0	2	0	0	4	1	2	0	0	0	0	0	0	0	5	0	0	0	0	0	0	0	0	0	0	0	0	0	0	0.006078	0	0.00205	0	0	0.005688	0.001316
OTU000159	18	1	0	4	0	0	0	2	0	0	0	0	0	0	0	0	2	0	1	1	0	1	0	1	0	5	0	0	0	0	0	0.001232	0	0.003921	0	0	0	0.002164	0	0	0	0	0	0	0	0	0.002456	0	0.001316
OTU000160	18	0	0	0	0	0	0	0	0	0	0	5	0	8	5	0	0	0	0	0	0	0	0	0	0	0	0	0	0	0	0	0	0	0	0	0	0	0	0	0	0	0.005187	0	0.00798	0.005125	0	0	0	0
OTU000161	18	0	0	0	0	0	1	0	1	0	0	0	0	0	2	0	5	2	0	0	0	0	1	0	5	0	0	0	0	0	1	0	0	0	0	0	0.00127	0	0.000973	0	0	0	0	0	0.00205	0	0.006139	0.002844	0
OTU000162	18	0	0	0	0	0	0	0	0	0	0	0	0	0	0	0	0	0	0	0	0	0	0	0	0	0	18	0	0	0	0	0	0	0	0	0	0	0	0	0	0	0	0	0	0	0	0	0	0
OTU000163	18	0	0	2	0	0	4	1	0	0	1	1	0	1	1	0	0	0	0	2	4	0	1	0	0	0	0	0	0	0	0	0	0	0.00196	0	0	0.005081	0.001082	0	0	0.001101	0.001037	0	0.000997	0.001025	0	0	0	0
OTU000164	18	0	0	0	0	2	1	0	1	0	0	0	0	0	0	0	0	0	0	0	0	6	0	0	0	3	0	0	0	5	0	0	0	0	0	0.001879	0.00127	0	0.000973	0	0	0	0	0	0	0	0	0	0
OTU000165	17	0	0	1	0	0	0	2	0	0	0	0	0	0	0	2	0	0	0	0	0	0	7	0	1	0	3	0	1	0	0	0	0	0.00098	0	0	0	0.002164	0	0	0	0	0	0	0	0.002081	0	0	0
OTU000166	17	0	0	0	0	0	1	0	2	0	0	0	0	0	0	0	0	0	0	0	6	1	3	0	1	3	0	0	0	0	0	0	0	0	0	0	0.00127	0	0.001945	0	0	0	0	0	0	0	0	0	0
OTU000167	17	0	0	0	0	0	0	0	0	0	0	2	5	1	2	1	0	0	0	0	1	0	0	0	0	0	1	0	4	0	0	0	0	0	0	0	0	0	0	0	0	0.002075	0.006078	0.000997	0.00205	0.00104	0	0	0
OTU000168	17	0	1	2	0	0	0	1	0	0	1	0	0	0	2	0	0	0	0	0	0	0	8	0	0	0	0	2	0	0	0	0	0.001052	0.00196	0	0	0	0.001082	0	0	0.001101	0	0	0	0.00205	0	0	0	0
OTU000169	17	0	0	0	0	0	1	1	0	0	0	0	0	1	0	1	0	0	1	1	2	0	3	0	0	4	0	1	0	0	1	0	0	0	0	0	0.00127	0.001082	0	0	0	0	0	0.000997	0	0.00104	0	0	0.001316
OTU000170	17	0	1	1	0	1	0	0	1	2	0	0	0	0	0	0	1	0	0	0	0	1	2	0	2	0	0	0	0	1	4	0	0.001052	0.00098	0	0.000939	0	0	0.000973	0.002017	0	0	0	0	0	0	0.001228	0	0
OTU000171	17	0	0	0	0	0	0	1	0	0	0	1	2	0	0	1	1	0	0	0	0	5	3	0	0	0	1	0	2	0	0	0	0	0	0	0	0	0.001082	0	0	0	0.001037	0.002431	0	0	0.00104	0.001228	0	0
OTU000172	17	0	13	0	0	1	0	0	0	0	0	0	0	0	0	1	0	0	0	0	0	0	2	0	0	0	0	0	0	0	0	0	0.01368	0	0	0.000939	0	0	0	0	0	0	0	0	0	0.00104	0	0	0
OTU000173	16	0	4	0	0	0	0	0	0	0	0	0	0	0	0	0	0	0	0	0	0	0	0	0	0	0	0	0	8	4	0	0	0.004209	0	0	0	0	0	0	0	0	0	0	0	0	0	0	0	0
OTU000174	16	0	0	1	0	1	0	0	1	0	0	0	0	1	0	0	0	0	0	1	2	0	6	0	0	0	0	3	0	0	0	0	0	0.00098	0	0.000939	0	0	0.000973	0	0	0	0	0.000997	0	0	0	0	0
OTU000175	16	1	1	0	0	0	0	0	0	1	2	0	1	0	0	0	0	0	0	0	0	3	0	0	5	0	0	0	0	0	2	0.001232	0.001052	0	0	0	0	0	0	0.001009	0.002201	0	0.001216	0	0	0	0	0	0
OTU000176	16	0	2	1	0	0	1	0	3	0	7	0	0	0	0	0	0	0	0	0	0	0	0	0	0	0	0	0	0	0	2	0	0.002105	0.00098	0	0	0.00127	0	0.002918	0	0.007704	0	0	0	0	0	0	0	0
OTU000177	16	0	0	0	1	0	0	0	1	2	1	0	1	0	0	0	0	0	4	0	0	0	3	1	0	0	0	2	0	0	0	0	0	0	0.001025	0	0	0	0.000973	0.002017	0.001101	0	0.001216	0	0	0	0	0	0.005265
OTU000178	15	1	1	2	0	0	0	0	0	0	0	0	0	0	0	0	0	0	0	0	0	3	0	3	0	5	0	0	0	0	0	0.001232	0.001052	0.00196	0	0	0	0	0	0	0	0	0	0	0	0	0	0	0
OTU000179	15	2	0	0	0	1	1	0	0	0	1	0	0	0	0	0	0	2	1	0	0	0	0	0	2	4	0	1	0	0	0	0.002463	0	0	0	0.000939	0.00127	0	0	0	0.001101	0	0	0	0	0	0	0.002844	0.001316
OTU000180	15	0	0	2	0	0	0	0	0	5	0	0	0	0	0	0	0	0	0	0	0	0	0	5	1	0	0	0	0	0	2	0	0	0.00196	0	0	0	0	0	0.005043	0	0	0	0	0	0	0	0	0
OTU000181	15	0	0	1	0	0	1	0	1	1	0	2	1	0	0	0	0	0	0	0	1	0	2	0	1	0	0	2	2	0	0	0	0	0.00098	0	0	0.00127	0	0.000973	0.001009	0	0.002075	0.001216	0	0	0	0	0	0
OTU000182	15	0	0	0	0	0	0	0	0	0	0	0	0	0	0	0	0	0	0	14	1	0	0	0	0	0	0	0	0	0	0	0	0	0	0	0	0	0	0	0	0	0	0	0	0	0	0	0	0
OTU000183	15	0	2	0	1	2	0	1	0	0	0	0	0	0	0	1	0	0	0	1	0	0	1	0	0	0	0	5	0	1	0	0	0.002105	0	0.001025	0.001879	0	0.001082	0	0	0	0	0	0	0	0.00104	0	0	0
OTU000184	14	0	0	0	0	0	0	0	1	0	1	0	0	0	1	0	0	0	0	0	0	1	0	1	4	1	0	3	1	0	0	0	0	0	0	0	0	0	0.000973	0	0.001101	0	0	0	0.001025	0	0	0	0
OTU000185	14	0	0	0	0	0	0	0	0	0	0	0	0	0	0	0	0	0	0	0	0	7	0	2	5	0	0	0	0	0	0	0	0	0	0	0	0	0	0	0	0	0	0	0	0	0	0	0	0
OTU000186	14	0	0	0	0	0	11	0	1	1	0	0	0	0	0	0	0	0	0	0	0	0	0	0	0	1	0	0	0	0	0	0	0	0	0	0	0.013973	0	0.000973	0.001009	0	0	0	0	0	0	0	0	0
OTU000187	14	2	0	2	0	1	0	0	1	0	0	1	0	1	1	0	1	1	0	0	0	0	0	0	1	1	0	0	0	0	1	0.002463	0	0.00196	0	0.000939	0	0	0.000973	0	0	0.001037	0	0.000997	0.001025	0	0.001228	0.001422	0
OTU000188	13	0	1	1	0	0	0	0	2	0	1	0	1	0	0	1	0	0	0	0	0	0	1	0	0	3	1	0	0	1	0	0	0.001052	0.00098	0	0	0	0	0.001945	0	0.001101	0	0.001216	0	0	0.00104	0	0	0
OTU000189	13	0	0	0	0	0	0	1	0	0	0	1	0	0	0	0	0	0	0	2	3	0	4	0	0	1	0	1	0	0	0	0	0	0	0	0	0	0.001082	0	0	0	0.001037	0	0	0	0	0	0	0
OTU000190	13	1	0	0	0	0	1	0	0	0	4	0	0	0	1	1	0	0	1	0	0	0	0	0	0	1	2	0	0	1	0	0.001232	0	0	0	0	0.00127	0	0	0	0.004402	0	0	0	0.001025	0.00104	0	0	0.001316
OTU000191	12	0	0	8	0	1	1	0	0	0	0	0	0	0	0	0	0	0	0	0	0	1	0	1	0	0	0	0	0	0	0	0	0	0.007841	0	0.000939	0.00127	0	0	0	0	0	0	0	0	0	0	0	0
OTU000192	12	0	1	3	1	0	0	0	0	0	0	1	0	1	0	1	0	0	0	0	0	0	1	0	0	0	2	0	1	0	0	0	0.001052	0.00294	0.001025	0	0	0	0	0	0	0.001037	0	0.000997	0	0.00104	0	0	0
OTU000193	12	0	0	1	2	0	0	2	0	0	0	0	0	0	0	0	0	0	0	0	0	0	4	0	0	0	0	0	0	3	0	0	0	0.00098	0.002049	0	0	0.002164	0	0	0	0	0	0	0	0	0	0	0
OTU000194	12	0	0	0	1	2	0	1	0	0	0	0	0	0	0	4	0	0	0	0	0	0	4	0	0	0	0	0	0	0	0	0	0	0	0.001025	0.001879	0	0.001082	0	0	0	0	0	0	0	0.004161	0	0	0
OTU000195	12	0	0	4	0	0	0	0	0	0	0	1	6	0	0	0	0	0	0	0	0	0	0	1	0	0	0	0	0	0	0	0	0	0.003921	0	0	0	0	0	0	0	0.001037	0.007293	0	0	0	0	0	0
OTU000196	12	0	1	0	2	0	0	0	0	1	0	0	1	1	0	0	0	0	1	0	0	1	1	1	1	0	0	0	0	1	0	0	0.001052	0	0.002049	0	0	0	0	0.001009	0	0	0.001216	0.000997	0	0	0	0	0.001316
OTU000197	11	0	1	0	0	0	0	2	0	0	0	0	0	0	0	0	0	0	1	0	0	0	0	0	1	1	0	1	1	3	0	0	0.001052	0	0	0	0	0.002164	0	0	0	0	0	0	0	0	0	0	0.001316
OTU000198	11	0	0	0	0	0	0	0	0	0	0	0	0	0	0	0	0	0	0	0	0	0	0	0	5	6	0	0	0	0	0	0	0	0	0	0	0	0	0	0	0	0	0	0	0	0	0	0	0
OTU000199	11	0	0	0	0	0	1	1	0	2	0	0	1	1	0	0	0	0	0	0	0	2	1	0	0	0	0	0	0	1	1	0	0	0	0	0	0.00127	0.001082	0	0.002017	0	0	0.001216	0.000997	0	0	0	0	0
OTU000200	11	0	0	1	0	0	0	0	0	0	0	0	0	0	1	0	1	0	0	3	1	0	0	0	0	0	2	0	0	2	0	0	0	0.00098	0	0	0	0	0	0	0	0	0	0	0.001025	0	0.001228	0	0
OTU000201	11	0	0	0	1	0	1	0	1	3	0	0	0	0	0	0	0	0	0	0	1	0	0	0	0	0	3	0	0	0	1	0	0	0	0.001025	0	0.00127	0	0.000973	0.003026	0	0	0	0	0	0	0	0	0
OTU000202	11	0	1	1	0	0	0	1	3	4	0	0	0	0	0	0	0	0	0	0	0	0	0	0	0	0	0	0	0	0	1	0	0.001052	0.00098	0	0	0	0.001082	0.002918	0.004035	0	0	0	0	0	0	0	0	0
OTU000203	10	0	0	0	0	1	0	0	0	0	0	0	3	0	2	0	0	0	2	1	0	0	0	1	0	0	0	0	0	0	0	0	0	0	0	0.000939	0	0	0	0	0	0	0.003647	0	0.00205	0	0	0	0.002632
OTU000204	10	0	0	0	0	0	0	0	0	0	0	0	0	0	0	0	0	0	0	0	0	1	0	0	0	9	0	0	0	0	0	0	0	0	0	0	0	0	0	0	0	0	0	0	0	0	0	0	0
OTU000205	10	0	0	2	0	0	2	0	1	0	0	0	1	0	0	0	0	0	0	0	4	0	0	0	0	0	0	0	0	0	0	0	0	0.00196	0	0	0.00254	0	0.000973	0	0	0	0.001216	0	0	0	0	0	0
OTU000206	10	0	0	0	0	0	0	1	0	0	0	0	0	0	0	2	0	0	0	0	2	0	0	0	0	5	0	0	0	0	0	0	0	0	0	0	0	0.001082	0	0	0	0	0	0	0	0.002081	0	0	0
OTU000207	10	0	0	0	0	0	0	0	0	0	1	0	0	2	0	0	0	0	0	0	0	0	2	0	0	1	0	0	4	0	0	0	0	0	0	0	0	0	0	0	0.001101	0	0	0.001995	0	0	0	0	0
OTU000208	10	0	2	0	0	0	0	0	0	1	0	1	0	0	0	0	0	0	1	0	0	0	0	5	0	0	0	0	0	0	0	0	0.002105	0	0	0	0	0	0	0.001009	0	0.001037	0	0	0	0	0	0	0.001316
OTU000209	10	0	0	0	0	0	0	0	0	0	0	0	0	0	0	0	0	0	0	1	2	0	0	0	1	0	0	3	3	0	0	0	0	0	0	0	0	0	0	0	0	0	0	0	0	0	0	0	0
OTU000210	9	0	0	0	0	0	0	3	0	0	0	0	0	0	0	0	0	0	0	0	4	0	0	0	0	0	0	2	0	0	0	0	0	0	0	0	0	0.003246	0	0	0	0	0	0	0	0	0	0	0
OTU000211	9	0	0	0	0	2	0	0	0	0	0	1	0	1	0	0	0	0	0	0	0	0	0	0	0	0	0	5	0	0	0	0	0	0	0	0.001879	0	0	0	0	0	0.001037	0	0.000997	0	0	0	0	0
OTU000212	9	0	0	0	0	0	0	0	0	0	0	0	0	0	0	0	0	1	0	1	1	0	0	0	0	4	0	0	2	0	0	0	0	0	0	0	0	0	0	0	0	0	0	0	0	0	0	0.001422	0
OTU000213	9	1	0	0	0	0	0	0	0	0	0	0	0	0	0	1	0	0	0	0	0	0	0	0	0	0	0	0	6	1	0	0.001232	0	0	0	0	0	0	0	0	0	0	0	0	0	0.00104	0	0	0
OTU000214	9	0	1	0	0	0	0	0	3	1	0	1	0	0	0	0	0	0	0	0	0	0	0	0	0	0	2	0	0	0	1	0	0.001052	0	0	0	0	0	0.002918	0.001009	0	0.001037	0	0	0	0	0	0	0
OTU000215	9	0	0	0	2	0	0	0	2	0	0	0	0	0	0	0	0	0	0	0	0	0	0	0	0	0	0	0	5	0	0	0	0	0	0.002049	0	0	0	0.001945	0	0	0	0	0	0	0	0	0	0
OTU000216	9	2	0	0	0	0	0	0	0	0	0	0	2	0	0	0	0	0	2	0	0	0	0	0	0	0	2	1	0	0	0	0.002463	0	0	0	0	0	0	0	0	0	0	0.002431	0	0	0	0	0	0.002632
OTU000217	9	1	0	0	0	1	0	0	0	0	0	0	0	0	1	0	0	0	0	1	0	0	0	1	0	0	0	2	2	0	0	0.001232	0	0	0	0.000939	0	0	0	0	0	0	0	0	0.001025	0	0	0	0
OTU000218	9	2	0	1	0	0	0	0	1	0	1	0	0	0	1	0	0	1	0	0	2	0	0	0	0	0	0	0	0	0	0	0.002463	0	0.00098	0	0	0	0	0.000973	0	0.001101	0	0	0	0.001025	0	0	0.001422	0
OTU000219	9	0	0	0	0	1	0	0	0	1	0	1	0	0	0	0	0	1	1	0	0	0	0	0	0	0	2	0	1	0	1	0	0	0	0	0.000939	0	0	0	0.001009	0	0.001037	0	0	0	0	0	0.001422	0.001316
OTU000220	9	1	0	0	0	0	0	0	0	0	1	0	0	4	0	0	0	0	0	1	0	0	0	0	0	1	0	1	0	0	0	0.001232	0	0	0	0	0	0	0	0	0.001101	0	0	0.00399	0	0	0	0	0
OTU000221	9	0	0	0	0	0	0	0	0	0	0	4	0	0	1	0	0	0	0	0	0	0	1	0	0	0	0	3	0	0	0	0	0	0	0	0	0	0	0	0	0	0.00415	0	0	0.001025	0	0	0	0
OTU000222	9	0	0	0	0	3	1	1	0	0	0	0	0	2	0	1	0	0	0	0	0	0	0	0	0	0	1	0	0	0	0	0	0	0	0	0.002818	0.00127	0.001082	0	0	0	0	0	0.001995	0	0.00104	0	0	0
OTU000223	9	0	1	1	0	0	5	0	0	0	2	0	0	0	0	0	0	0	0	0	0	0	0	0	0	0	0	0	0	0	0	0	0.001052	0.00098	0	0	0.006351	0	0	0	0.002201	0	0	0	0	0	0	0	0
OTU000224	9	0	0	1	0	0	1	0	1	0	0	1	0	0	0	0	0	0	0	0	0	0	0	3	0	1	0	0	1	0	0	0	0	0.00098	0	0	0.00127	0	0.000973	0	0	0.001037	0	0	0	0	0	0	0
OTU000225	9	0	0	0	0	0	0	5	1	0	1	0	2	0	0	0	0	0	0	0	0	0	0	0	0	0	0	0	0	0	0	0	0	0	0	0	0	0.005409	0.000973	0	0.001101	0	0.002431	0	0	0	0	0	0
OTU000226	9	0	1	1	0	0	0	1	2	0	0	0	0	0	2	1	0	1	0	0	0	0	0	0	0	0	0	0	0	0	0	0	0.001052	0.00098	0	0	0	0.001082	0.001945	0	0	0	0	0	0.00205	0.00104	0	0.001422	0
OTU000227	9	0	0	0	0	0	0	0	1	0	1	0	0	0	0	0	0	0	0	0	0	0	1	0	2	4	0	0	0	0	0	0	0	0	0	0	0	0	0.000973	0	0.001101	0	0	0	0	0	0	0	0
OTU000228	8	0	0	0	0	0	0	0	0	0	0	1	0	2	2	0	0	0	0	0	1	0	0	0	0	0	1	0	1	0	0	0	0	0	0	0	0	0	0	0	0	0.001037	0	0.001995	0.00205	0	0	0	0
OTU000229	8	0	0	0	0	0	8	0	0	0	0	0	0	0	0	0	0	0	0	0	0	0	0	0	0	0	0	0	0	0	0	0	0	0	0	0	0.010162	0	0	0	0	0	0	0	0	0	0	0	0
OTU000230	8	0	0	0	0	2	0	0	0	0	0	0	0	0	0	0	0	0	0	1	0	0	0	0	0	0	4	0	1	0	0	0	0	0	0	0.001879	0	0	0	0	0	0	0	0	0	0	0	0	0
OTU000231	8	0	0	0	0	0	3	0	0	0	0	0	0	0	0	0	0	0	0	0	0	3	0	1	1	0	0	0	0	0	0	0	0	0	0	0	0.003811	0	0	0	0	0	0	0	0	0	0	0	0
OTU000232	8	1	0	0	1	0	1	0	0	1	0	2	0	0	0	0	0	0	1	0	0	0	0	0	0	0	0	0	1	0	0	0.001232	0	0	0.001025	0	0.00127	0	0	0.001009	0	0.002075	0	0	0	0	0	0	0.001316
OTU000233	8	0	0	0	0	0	0	0	0	0	0	0	0	0	0	0	0	0	0	8	0	0	0	0	0	0	0	0	0	0	0	0	0	0	0	0	0	0	0	0	0	0	0	0	0	0	0	0	0
OTU000234	8	0	0	0	0	0	0	0	0	0	0	0	0	0	0	0	0	0	0	0	7	1	0	0	0	0	0	0	0	0	0	0	0	0	0	0	0	0	0	0	0	0	0	0	0	0	0	0	0
OTU000235	8	1	0	0	2	5	0	0	0	0	0	0	0	0	0	0	0	0	0	0	0	0	0	0	0	0	0	0	0	0	0	0.001232	0	0	0.002049	0.004697	0	0	0	0	0	0	0	0	0	0	0	0	0
OTU000236	8	0	0	0	1	0	0	0	0	0	0	0	0	2	0	0	0	0	0	0	0	0	0	0	0	0	1	0	1	3	0	0	0	0	0.001025	0	0	0	0	0	0	0	0	0.001995	0	0	0	0	0
OTU000237	8	0	0	0	0	2	1	0	3	0	0	1	0	0	0	0	0	0	0	0	0	0	1	0	0	0	0	0	0	0	0	0	0	0	0	0.001879	0.00127	0	0.002918	0	0	0.001037	0	0	0	0	0	0	0
OTU000238	8	0	0	0	0	0	0	0	0	0	0	0	0	0	0	0	0	1	0	0	0	0	1	1	1	3	0	1	0	0	0	0	0	0	0	0	0	0	0	0	0	0	0	0	0	0	0	0.001422	0
OTU000239	7	0	0	0	1	0	0	4	0	0	0	0	0	0	0	1	0	0	0	0	1	0	0	0	0	0	0	0	0	0	0	0	0	0	0.001025	0	0	0.004327	0	0	0	0	0	0	0	0.00104	0	0	0
OTU000240	7	0	0	0	0	0	0	0	0	0	0	0	1	0	0	0	0	1	0	0	0	0	0	0	2	1	0	0	0	2	0	0	0	0	0	0	0	0	0	0	0	0	0.001216	0	0	0	0	0.001422	0
OTU000241	7	0	0	0	0	0	0	0	0	0	0	1	0	0	1	0	0	0	0	0	0	0	0	0	0	0	3	1	1	0	0	0	0	0	0	0	0	0	0	0	0	0.001037	0	0	0.001025	0	0	0	0
OTU000242	7	0	0	0	0	0	1	0	0	0	0	0	0	0	0	0	1	0	0	0	4	0	0	0	0	0	0	1	0	0	0	0	0	0	0	0	0.00127	0	0	0	0	0	0	0	0	0	0.001228	0	0
OTU000243	7	0	0	1	1	0	0	0	0	0	0	2	0	0	0	1	0	0	0	0	0	0	1	0	0	1	0	0	0	0	0	0	0	0.00098	0.001025	0	0	0	0	0	0	0.002075	0	0	0	0.00104	0	0	0
OTU000244	7	0	0	0	0	0	0	0	0	0	0	0	0	0	0	0	5	0	0	0	1	0	0	0	0	0	1	0	0	0	0	0	0	0	0	0	0	0	0	0	0	0	0	0	0	0	0.006139	0	0
OTU000245	7	0	0	0	0	0	0	0	0	0	0	0	0	0	0	0	0	0	0	0	0	0	0	0	0	0	0	0	7	0	0	0	0	0	0	0	0	0	0	0	0	0	0	0	0	0	0	0	0
OTU000246	7	0	0	0	0	0	0	0	0	0	0	0	0	0	0	0	0	0	0	0	7	0	0	0	0	0	0	0	0	0	0	0	0	0	0	0	0	0	0	0	0	0	0	0	0	0	0	0	0
OTU000247	7	0	0	0	0	0	0	0	0	0	0	2	1	0	3	0	0	0	0	0	0	0	0	0	0	0	1	0	0	0	0	0	0	0	0	0	0	0	0	0	0	0.002075	0.001216	0	0.003075	0	0	0	0
OTU000248	6	0	0	2	0	4	0	0	0	0	0	0	0	0	0	0	0	0	0	0	0	0	0	0	0	0	0	0	0	0	0	0	0	0.00196	0	0.003757	0	0	0	0	0	0	0	0	0	0	0	0	0
OTU000249	6	0	0	0	0	0	1	0	0	1	1	0	0	0	0	0	0	0	0	0	0	0	0	1	1	1	0	0	0	0	0	0	0	0	0	0	0.00127	0	0	0.001009	0.001101	0	0	0	0	0	0	0	0
OTU000250	6	1	3	1	0	0	0	0	0	0	0	1	0	0	0	0	0	0	0	0	0	0	0	0	0	0	0	0	0	0	0	0.001232	0.003157	0.00098	0	0	0	0	0	0	0	0.001037	0	0	0	0	0	0	0
OTU000251	6	0	1	1	0	0	0	1	2	0	0	0	0	0	0	0	0	0	0	0	0	0	0	1	0	0	0	0	0	0	0	0	0.001052	0.00098	0	0	0	0.001082	0.001945	0	0	0	0	0	0	0	0	0	0
OTU000252	6	0	0	0	0	0	0	0	0	0	0	0	0	0	0	0	0	0	0	0	1	0	5	0	0	0	0	0	0	0	0	0	0	0	0	0	0	0	0	0	0	0	0	0	0	0	0	0	0
OTU000253	6	0	0	0	0	0	0	0	0	0	0	0	0	0	0	0	0	0	0	0	0	0	0	0	0	5	0	0	0	0	1	0	0	0	0	0	0	0	0	0	0	0	0	0	0	0	0	0	0
OTU000254	6	0	0	0	0	0	0	0	0	0	0	0	0	0	0	0	5	0	0	0	1	0	0	0	0	0	0	0	0	0	0	0	0	0	0	0	0	0	0	0	0	0	0	0	0	0	0.006139	0	0
OTU000255	6	0	0	0	4	0	0	0	0	0	1	0	0	0	1	0	0	0	0	0	0	0	0	0	0	0	0	0	0	0	0	0	0	0	0.004099	0	0	0	0	0	0.001101	0	0	0	0.001025	0	0	0	0
OTU000256	6	0	0	0	0	0	0	0	0	0	0	0	1	0	2	0	0	1	2	0	0	0	0	0	0	0	0	0	0	0	0	0	0	0	0	0	0	0	0	0	0	0	0.001216	0	0.00205	0	0	0.001422	0.002632
OTU000257	6	0	0	0	0	0	0	0	0	0	0	0	0	0	0	0	0	0	0	0	0	6	0	0	0	0	0	0	0	0	0	0	0	0	0	0	0	0	0	0	0	0	0	0	0	0	0	0	0
OTU000258	6	0	0	0	0	0	0	0	0	0	0	0	0	0	0	0	0	0	0	0	0	0	0	2	0	4	0	0	0	0	0	0	0	0	0	0	0	0	0	0	0	0	0	0	0	0	0	0	0
OTU000259	6	0	0	0	2	0	0	0	0	0	0	0	0	0	0	0	0	0	0	0	0	0	3	0	0	0	1	0	0	0	0	0	0	0	0.002049	0	0	0	0	0	0	0	0	0	0	0	0	0	0
OTU000260	6	0	0	0	0	0	0	0	0	0	0	2	1	2	1	0	0	0	0	0	0	0	0	0	0	0	0	0	0	0	0	0	0	0	0	0	0	0	0	0	0	0.002075	0.001216	0.001995	0.001025	0	0	0	0
OTU000261	5	0	0	0	0	0	0	0	0	0	0	0	0	0	0	0	0	0	0	0	0	0	0	0	0	0	0	5	0	0	0	0	0	0	0	0	0	0	0	0	0	0	0	0	0	0	0	0	0
OTU000262	5	0	0	0	0	0	0	0	2	0	0	3	0	0	0	0	0	0	0	0	0	0	0	0	0	0	0	0	0	0	0	0	0	0	0	0	0	0	0.001945	0	0	0.003112	0	0	0	0	0	0	0
OTU000263	5	0	0	4	0	1	0	0	0	0	0	0	0	0	0	0	0	0	0	0	0	0	0	0	0	0	0	0	0	0	0	0	0	0.003921	0	0.000939	0	0	0	0	0	0	0	0	0	0	0	0	0
OTU000264	5	0	0	0	0	0	0	0	0	0	0	0	0	0	0	0	0	0	0	0	0	0	0	5	0	0	0	0	0	0	0	0	0	0	0	0	0	0	0	0	0	0	0	0	0	0	0	0	0
OTU000265	5	0	0	0	0	0	3	0	0	0	0	0	0	0	0	0	0	0	0	0	1	0	0	0	0	1	0	0	0	0	0	0	0	0	0	0	0.003811	0	0	0	0	0	0	0	0	0	0	0	0
OTU000266	5	0	0	0	0	0	0	0	0	0	0	0	0	0	1	0	0	0	0	4	0	0	0	0	0	0	0	0	0	0	0	0	0	0	0	0	0	0	0	0	0	0	0	0	0.001025	0	0	0	0
OTU000267	5	0	0	0	0	0	0	0	0	0	0	0	0	0	0	0	0	0	0	0	0	0	0	0	0	2	0	0	0	3	0	0	0	0	0	0	0	0	0	0	0	0	0	0	0	0	0	0	0
OTU000268	5	0	0	0	0	0	0	0	0	0	0	0	0	0	0	0	0	0	0	0	0	0	5	0	0	0	0	0	0	0	0	0	0	0	0	0	0	0	0	0	0	0	0	0	0	0	0	0	0
OTU000269	5	0	0	0	0	0	0	0	0	0	0	0	0	0	0	0	0	0	0	0	2	0	3	0	0	0	0	0	0	0	0	0	0	0	0	0	0	0	0	0	0	0	0	0	0	0	0	0	0
OTU000270	5	0	0	0	0	0	0	0	0	0	0	0	0	0	0	0	0	0	0	0	0	0	0	0	0	0	0	0	0	5	0	0	0	0	0	0	0	0	0	0	0	0	0	0	0	0	0	0	0
OTU000271	5	0	0	0	0	0	0	0	0	0	0	0	0	0	0	0	0	0	0	1	0	0	0	0	0	3	0	0	0	0	1	0	0	0	0	0	0	0	0	0	0	0	0	0	0	0	0	0	0
OTU000272	5	0	0	0	0	0	0	0	0	0	0	0	0	0	0	0	0	0	0	0	0	0	0	0	0	0	5	0	0	0	0	0	0	0	0	0	0	0	0	0	0	0	0	0	0	0	0	0	0
OTU000273	5	0	0	0	0	0	0	0	0	0	0	0	0	0	0	0	1	0	0	0	2	0	1	0	0	0	0	0	0	1	0	0	0	0	0	0	0	0	0	0	0	0	0	0	0	0	0.001228	0	0
OTU000274	5	0	0	0	0	0	0	0	0	0	0	0	0	0	0	0	0	0	0	0	2	0	0	0	0	0	0	0	3	0	0	0	0	0	0	0	0	0	0	0	0	0	0	0	0	0	0	0	0
OTU000275	5	0	0	0	0	0	0	0	0	0	0	0	0	0	0	0	0	0	0	0	0	0	5	0	0	0	0	0	0	0	0	0	0	0	0	0	0	0	0	0	0	0	0	0	0	0	0	0	0
OTU000276	5	0	2	0	1	2	0	0	0	0	0	0	0	0	0	0	0	0	0	0	0	0	0	0	0	0	0	0	0	0	0	0	0.002105	0	0.001025	0.001879	0	0	0	0	0	0	0	0	0	0	0	0	0
OTU000277	5	0	0	0	0	0	0	0	0	0	0	1	0	0	0	0	0	0	0	0	0	0	0	0	0	0	0	4	0	0	0	0	0	0	0	0	0	0	0	0	0	0.001037	0	0	0	0	0	0	0
OTU000278	5	0	0	0	1	3	0	0	0	0	0	0	0	0	0	0	0	0	0	0	0	0	1	0	0	0	0	0	0	0	0	0	0	0	0.001025	0.002818	0	0	0	0	0	0	0	0	0	0	0	0	0
OTU000279	5	0	0	0	0	0	0	0	0	0	0	0	0	2	0	0	0	0	0	0	1	0	0	0	0	0	0	0	0	2	0	0	0	0	0	0	0	0	0	0	0	0	0	0.001995	0	0	0	0	0
OTU000280	5	0	0	0	0	0	5	0	0	0	0	0	0	0	0	0	0	0	0	0	0	0	0	0	0	0	0	0	0	0	0	0	0	0	0	0	0.006351	0	0	0	0	0	0	0	0	0	0	0	0
OTU000281	5	0	0	0	0	0	0	0	0	0	0	0	0	0	0	0	0	0	0	0	0	0	0	0	0	0	0	0	0	4	1	0	0	0	0	0	0	0	0	0	0	0	0	0	0	0	0	0	0
OTU000282	5	0	0	0	0	0	0	0	4	0	0	0	0	0	0	0	0	1	0	0	0	0	0	0	0	0	0	0	0	0	0	0	0	0	0	0	0	0	0.00389	0	0	0	0	0	0	0	0	0.001422	0
OTU000283	5	0	0	0	0	0	0	0	0	0	0	0	0	0	0	0	0	0	0	0	0	0	4	0	1	0	0	0	0	0	0	0	0	0	0	0	0	0	0	0	0	0	0	0	0	0	0	0	0
OTU000284	5	0	0	0	0	0	3	0	0	0	1	0	1	0	0	0	0	0	0	0	0	0	0	0	0	0	0	0	0	0	0	0	0	0	0	0	0.003811	0	0	0	0.001101	0	0.001216	0	0	0	0	0	0
OTU000285	5	0	0	0	0	0	0	0	0	0	0	0	0	0	0	0	0	0	0	1	0	0	0	0	0	0	0	4	0	0	0	0	0	0	0	0	0	0	0	0	0	0	0	0	0	0	0	0	0
OTU000286	5	0	0	0	0	0	0	0	0	0	0	0	0	0	0	0	0	0	0	0	0	0	0	0	0	5	0	0	0	0	0	0	0	0	0	0	0	0	0	0	0	0	0	0	0	0	0	0	0
OTU000287	5	0	0	0	0	0	0	0	0	0	0	0	0	0	0	0	0	0	0	0	0	0	0	0	0	0	0	5	0	0	0	0	0	0	0	0	0	0	0	0	0	0	0	0	0	0	0	0	0
OTU000288	5	0	0	0	0	0	0	0	0	0	0	0	0	0	0	0	0	2	0	0	3	0	0	0	0	0	0	0	0	0	0	0	0	0	0	0	0	0	0	0	0	0	0	0	0	0	0	0.002844	0
OTU000289	4	0	0	0	1	0	0	0	0	0	0	0	0	0	0	0	0	0	0	0	0	1	0	0	0	2	0	0	0	0	0	0	0	0	0.001025	0	0	0	0	0	0	0	0	0	0	0	0	0	0
OTU000290	4	0	1	0	0	3	0	0	0	0	0	0	0	0	0	0	0	0	0	0	0	0	0	0	0	0	0	0	0	0	0	0	0.001052	0	0	0.002818	0	0	0	0	0	0	0	0	0	0	0	0	0
OTU000291	4	0	0	0	0	0	0	0	0	0	0	0	0	0	0	0	4	0	0	0	0	0	0	0	0	0	0	0	0	0	0	0	0	0	0	0	0	0	0	0	0	0	0	0	0	0	0.004912	0	0
OTU000292	4	0	0	0	1	0	0	0	0	0	0	0	0	0	0	0	0	0	0	0	0	1	0	0	0	0	0	0	0	0	2	0	0	0	0.001025	0	0	0	0	0	0	0	0	0	0	0	0	0	0
OTU000293	4	0	0	0	0	0	0	0	0	0	0	0	0	0	0	0	0	0	0	0	0	0	4	0	0	0	0	0	0	0	0	0	0	0	0	0	0	0	0	0	0	0	0	0	0	0	0	0	0
OTU000294	4	0	0	0	0	0	0	0	0	0	0	0	3	0	0	0	0	0	0	0	0	0	0	0	0	1	0	0	0	0	0	0	0	0	0	0	0	0	0	0	0	0	0.003647	0	0	0	0	0	0
OTU000295	4	0	0	0	0	0	0	0	2	0	1	0	0	0	0	0	0	0	0	0	0	0	0	1	0	0	0	0	0	0	0	0	0	0	0	0	0	0	0.001945	0	0.001101	0	0	0	0	0	0	0	0
OTU000296	4	0	0	0	0	0	1	0	0	0	0	0	0	0	0	0	0	0	0	0	0	0	0	0	0	0	0	0	0	0	3	0	0	0	0	0	0.00127	0	0	0	0	0	0	0	0	0	0	0	0
OTU000297	4	0	1	0	0	0	0	1	0	0	0	0	0	0	0	0	0	0	0	0	0	0	0	1	0	0	0	0	0	1	0	0	0.001052	0	0	0	0	0.001082	0	0	0	0	0	0	0	0	0	0	0
OTU000298	4	0	0	0	0	0	0	0	0	0	0	0	1	0	0	0	0	0	0	0	2	0	0	0	0	0	1	0	0	0	0	0	0	0	0	0	0	0	0	0	0	0	0.001216	0	0	0	0	0	0
OTU000299	4	0	0	0	0	0	0	0	0	0	0	0	0	0	0	0	0	0	0	0	0	0	0	0	0	0	0	0	4	0	0	0	0	0	0	0	0	0	0	0	0	0	0	0	0	0	0	0	0
OTU000300	4	0	0	0	0	0	0	0	0	0	0	0	0	0	0	0	0	0	0	0	0	0	0	0	0	4	0	0	0	0	0	0	0	0	0	0	0	0	0	0	0	0	0	0	0	0	0	0	0
OTU000301	4	0	0	0	0	0	0	0	0	0	0	0	0	4	0	0	0	0	0	0	0	0	0	0	0	0	0	0	0	0	0	0	0	0	0	0	0	0	0	0	0	0	0	0.00399	0	0	0	0	0
OTU000302	4	0	0	0	0	0	0	0	0	0	0	0	0	0	0	1	0	0	0	0	0	0	0	3	0	0	0	0	0	0	0	0	0	0	0	0	0	0	0	0	0	0	0	0	0	0.00104	0	0	0
OTU000303	4	0	0	0	0	0	0	0	0	0	0	2	0	1	0	0	0	0	0	0	0	0	0	0	1	0	0	0	0	0	0	0	0	0	0	0	0	0	0	0	0	0.002075	0	0.000997	0	0	0	0	0
OTU000304	4	0	0	1	0	0	0	0	0	0	0	0	0	0	0	0	0	0	0	0	0	0	0	0	0	0	0	0	0	0	3	0	0	0.00098	0	0	0	0	0	0	0	0	0	0	0	0	0	0	0
OTU000305	4	0	0	0	0	0	0	0	0	0	0	0	0	0	0	0	0	1	0	0	0	0	0	0	3	0	0	0	0	0	0	0	0	0	0	0	0	0	0	0	0	0	0	0	0	0	0	0.001422	0
OTU000306	4	1	0	0	0	0	1	0	0	0	0	0	0	0	0	0	0	0	0	0	0	0	0	0	0	2	0	0	0	0	0	0.001232	0	0	0	0	0.00127	0	0	0	0	0	0	0	0	0	0	0	0
OTU000307	4	0	0	0	0	0	0	0	2	0	0	0	0	0	0	0	0	0	0	0	2	0	0	0	0	0	0	0	0	0	0	0	0	0	0	0	0	0	0.001945	0	0	0	0	0	0	0	0	0	0
OTU000308	4	1	0	0	3	0	0	0	0	0	0	0	0	0	0	0	0	0	0	0	0	0	0	0	0	0	0	0	0	0	0	0.001232	0	0	0.003074	0	0	0	0	0	0	0	0	0	0	0	0	0	0
OTU000309	4	0	0	0	0	0	0	0	0	0	0	0	0	0	0	0	0	0	0	0	0	0	0	0	0	0	0	4	0	0	0	0	0	0	0	0	0	0	0	0	0	0	0	0	0	0	0	0	0
OTU000310	4	0	0	0	0	0	0	0	0	0	0	0	0	0	0	0	0	0	0	0	4	0	0	0	0	0	0	0	0	0	0	0	0	0	0	0	0	0	0	0	0	0	0	0	0	0	0	0	0
OTU000311	4	0	2	0	0	0	0	0	0	0	1	0	0	0	0	0	0	0	0	0	0	0	0	0	0	0	0	0	1	0	0	0	0.002105	0	0	0	0	0	0	0	0.001101	0	0	0	0	0	0	0	0
OTU000312	4	0	0	0	0	0	0	0	4	0	0	0	0	0	0	0	0	0	0	0	0	0	0	0	0	0	0	0	0	0	0	0	0	0	0	0	0	0	0.00389	0	0	0	0	0	0	0	0	0	0
OTU000313	4	0	2	1	0	0	0	0	0	0	0	0	0	0	0	0	0	0	0	0	0	0	0	0	0	0	0	0	0	1	0	0	0.002105	0.00098	0	0	0	0	0	0	0	0	0	0	0	0	0	0	0
OTU000314	4	0	0	0	0	0	0	1	0	0	0	0	0	0	0	0	0	0	0	0	0	3	0	0	0	0	0	0	0	0	0	0	0	0	0	0	0	0.001082	0	0	0	0	0	0	0	0	0	0	0
OTU000315	4	0	0	0	0	0	0	0	0	0	0	0	0	0	0	0	0	0	0	0	0	0	2	0	0	0	0	0	0	2	0	0	0	0	0	0	0	0	0	0	0	0	0	0	0	0	0	0	0
OTU000316	4	0	0	0	0	0	0	0	0	0	0	0	0	0	0	0	0	0	0	0	0	0	0	0	0	0	0	0	4	0	0	0	0	0	0	0	0	0	0	0	0	0	0	0	0	0	0	0	0
OTU000317	4	0	0	0	0	0	0	0	0	0	0	0	0	0	0	0	0	0	0	0	0	0	4	0	0	0	0	0	0	0	0	0	0	0	0	0	0	0	0	0	0	0	0	0	0	0	0	0	0
OTU000318	4	0	0	0	1	0	0	0	0	0	0	0	0	2	0	0	0	0	0	0	0	1	0	0	0	0	0	0	0	0	0	0	0	0	0.001025	0	0	0	0	0	0	0	0	0.001995	0	0	0	0	0
OTU000319	4	0	0	0	0	0	0	4	0	0	0	0	0	0	0	0	0	0	0	0	0	0	0	0	0	0	0	0	0	0	0	0	0	0	0	0	0	0.004327	0	0	0	0	0	0	0	0	0	0	0
OTU000320	4	0	0	0	4	0	0	0	0	0	0	0	0	0	0	0	0	0	0	0	0	0	0	0	0	0	0	0	0	0	0	0	0	0	0.004099	0	0	0	0	0	0	0	0	0	0	0	0	0	0
OTU000321	4	0	0	1	0	3	0	0	0	0	0	0	0	0	0	0	0	0	0	0	0	0	0	0	0	0	0	0	0	0	0	0	0	0.00098	0	0.002818	0	0	0	0	0	0	0	0	0	0	0	0	0
OTU000322	4	0	0	0	0	0	0	0	0	0	0	0	0	0	0	0	0	0	0	0	1	0	0	0	0	2	0	0	1	0	0	0	0	0	0	0	0	0	0	0	0	0	0	0	0	0	0	0	0
OTU000323	4	0	0	0	0	0	1	0	0	0	0	0	0	0	0	0	0	0	0	0	0	2	0	0	0	0	0	0	0	0	1	0	0	0	0	0	0.00127	0	0	0	0	0	0	0	0	0	0	0	0
OTU000324	4	0	0	0	0	0	0	0	0	0	0	0	0	0	0	0	0	0	0	0	0	0	4	0	0	0	0	0	0	0	0	0	0	0	0	0	0	0	0	0	0	0	0	0	0	0	0	0	0
OTU000325	4	0	0	0	0	0	0	0	1	0	0	0	0	0	0	0	0	0	0	0	0	0	0	0	0	3	0	0	0	0	0	0	0	0	0	0	0	0	0.000973	0	0	0	0	0	0	0	0	0	0
OTU000326	4	0	0	0	0	0	0	0	0	0	0	0	0	0	4	0	0	0	0	0	0	0	0	0	0	0	0	0	0	0	0	0	0	0	0	0	0	0	0	0	0	0	0	0	0.0041	0	0	0	0
OTU000327	4	3	0	0	0	0	0	0	0	0	0	0	0	0	0	0	0	0	0	0	0	0	0	0	1	0	0	0	0	0	0	0.003695	0	0	0	0	0	0	0	0	0	0	0	0	0	0	0	0	0
OTU000328	4	0	0	0	0	1	0	0	0	0	0	0	0	0	0	0	0	2	0	0	0	1	0	0	0	0	0	0	0	0	0	0	0	0	0	0.000939	0	0	0	0	0	0	0	0	0	0	0	0.002844	0
OTU000329	4	0	0	0	0	0	0	0	0	0	0	0	0	0	0	0	0	0	0	0	3	0	0	0	1	0	0	0	0	0	0	0	0	0	0	0	0	0	0	0	0	0	0	0	0	0	0	0	0
OTU000330	3	0	0	0	2	0	0	0	0	1	0	0	0	0	0	0	0	0	0	0	0	0	0	0	0	0	0	0	0	0	0	0	0	0	0.002049	0	0	0	0	0.001009	0	0	0	0	0	0	0	0	0
OTU000331	3	0	0	0	0	0	0	0	0	0	0	0	0	0	0	0	0	0	0	1	0	0	0	0	2	0	0	0	0	0	0	0	0	0	0	0	0	0	0	0	0	0	0	0	0	0	0	0	0
OTU000332	3	0	0	0	0	0	0	0	0	0	0	0	0	0	0	0	0	0	0	0	0	0	0	0	0	0	0	0	3	0	0	0	0	0	0	0	0	0	0	0	0	0	0	0	0	0	0	0	0
OTU000333	3	0	0	0	0	0	0	0	0	0	0	0	0	0	0	0	0	0	0	0	2	0	0	0	0	0	0	1	0	0	0	0	0	0	0	0	0	0	0	0	0	0	0	0	0	0	0	0	0
OTU000334	3	0	0	0	0	0	0	0	0	0	0	0	0	0	0	0	0	0	0	2	0	0	0	1	0	0	0	0	0	0	0	0	0	0	0	0	0	0	0	0	0	0	0	0	0	0	0	0	0
OTU000335	3	0	0	0	0	0	0	0	0	0	0	0	0	0	0	0	0	0	0	0	0	0	0	1	0	0	0	0	0	2	0	0	0	0	0	0	0	0	0	0	0	0	0	0	0	0	0	0	0
OTU000336	3	0	0	0	0	0	0	3	0	0	0	0	0	0	0	0	0	0	0	0	0	0	0	0	0	0	0	0	0	0	0	0	0	0	0	0	0	0.003246	0	0	0	0	0	0	0	0	0	0	0
OTU000337	3	3	0	0	0	0	0	0	0	0	0	0	0	0	0	0	0	0	0	0	0	0	0	0	0	0	0	0	0	0	0	0.003695	0	0	0	0	0	0	0	0	0	0	0	0	0	0	0	0	0
OTU000338	3	0	0	0	0	0	0	0	0	0	0	0	0	0	0	0	0	0	0	0	0	0	0	0	0	3	0	0	0	0	0	0	0	0	0	0	0	0	0	0	0	0	0	0	0	0	0	0	0
OTU000339	3	0	0	0	0	0	3	0	0	0	0	0	0	0	0	0	0	0	0	0	0	0	0	0	0	0	0	0	0	0	0	0	0	0	0	0	0.003811	0	0	0	0	0	0	0	0	0	0	0	0
OTU000340	3	0	0	0	0	0	0	0	0	0	0	0	0	0	0	0	0	0	0	0	0	3	0	0	0	0	0	0	0	0	0	0	0	0	0	0	0	0	0	0	0	0	0	0	0	0	0	0	0
OTU000341	3	0	0	0	0	0	0	0	0	0	0	0	0	0	0	0	0	0	0	0	0	0	0	0	0	0	3	0	0	0	0	0	0	0	0	0	0	0	0	0	0	0	0	0	0	0	0	0	0
OTU000342	3	0	0	0	0	0	0	0	0	0	1	0	0	0	2	0	0	0	0	0	0	0	0	0	0	0	0	0	0	0	0	0	0	0	0	0	0	0	0	0	0.001101	0	0	0	0.00205	0	0	0	0
OTU000343	3	0	0	0	0	2	0	0	0	0	0	0	0	1	0	0	0	0	0	0	0	0	0	0	0	0	0	0	0	0	0	0	0	0	0	0.001879	0	0	0	0	0	0	0	0.000997	0	0	0	0	0
OTU000344	3	0	0	0	0	0	0	0	0	0	0	0	0	0	0	0	0	0	0	0	0	0	0	0	0	0	0	0	0	0	3	0	0	0	0	0	0	0	0	0	0	0	0	0	0	0	0	0	0
OTU000345	3	0	0	0	0	0	0	0	0	0	0	0	0	0	0	0	0	0	0	0	0	3	0	0	0	0	0	0	0	0	0	0	0	0	0	0	0	0	0	0	0	0	0	0	0	0	0	0	0
OTU000346	3	0	0	0	3	0	0	0	0	0	0	0	0	0	0	0	0	0	0	0	0	0	0	0	0	0	0	0	0	0	0	0	0	0	0.003074	0	0	0	0	0	0	0	0	0	0	0	0	0	0
OTU000347	3	0	0	0	0	0	0	0	2	0	0	0	0	1	0	0	0	0	0	0	0	0	0	0	0	0	0	0	0	0	0	0	0	0	0	0	0	0	0.001945	0	0	0	0	0.000997	0	0	0	0	0
OTU000348	3	0	3	0	0	0	0	0	0	0	0	0	0	0	0	0	0	0	0	0	0	0	0	0	0	0	0	0	0	0	0	0	0.003157	0	0	0	0	0	0	0	0	0	0	0	0	0	0	0	0
OTU000349	3	0	0	0	0	0	0	0	0	0	0	0	0	0	0	0	0	0	0	0	0	0	0	0	3	0	0	0	0	0	0	0	0	0	0	0	0	0	0	0	0	0	0	0	0	0	0	0	0
OTU000350	3	0	0	0	0	0	0	1	0	0	0	0	0	0	0	0	0	2	0	0	0	0	0	0	0	0	0	0	0	0	0	0	0	0	0	0	0	0.001082	0	0	0	0	0	0	0	0	0	0.002844	0
OTU000351	3	0	0	0	0	0	0	3	0	0	0	0	0	0	0	0	0	0	0	0	0	0	0	0	0	0	0	0	0	0	0	0	0	0	0	0	0	0.003246	0	0	0	0	0	0	0	0	0	0	0
OTU000352	3	0	0	0	0	0	0	0	0	0	0	0	0	0	0	0	0	0	0	0	0	0	0	0	0	0	3	0	0	0	0	0	0	0	0	0	0	0	0	0	0	0	0	0	0	0	0	0	0
OTU000353	3	0	0	0	0	0	0	0	0	0	0	0	0	0	0	0	0	0	0	0	0	0	0	0	0	0	3	0	0	0	0	0	0	0	0	0	0	0	0	0	0	0	0	0	0	0	0	0	0
OTU000354	3	0	0	3	0	0	0	0	0	0	0	0	0	0	0	0	0	0	0	0	0	0	0	0	0	0	0	0	0	0	0	0	0	0.00294	0	0	0	0	0	0	0	0	0	0	0	0	0	0	0
OTU000355	3	0	0	0	0	0	1	0	0	2	0	0	0	0	0	0	0	0	0	0	0	0	0	0	0	0	0	0	0	0	0	0	0	0	0	0	0.00127	0	0	0.002017	0	0	0	0	0	0	0	0	0
OTU000356	3	0	0	0	0	0	0	0	0	0	0	0	0	0	0	0	0	0	0	3	0	0	0	0	0	0	0	0	0	0	0	0	0	0	0	0	0	0	0	0	0	0	0	0	0	0	0	0	0
OTU000357	3	0	2	1	0	0	0	0	0	0	0	0	0	0	0	0	0	0	0	0	0	0	0	0	0	0	0	0	0	0	0	0	0.002105	0.00098	0	0	0	0	0	0	0	0	0	0	0	0	0	0	0
OTU000358	3	0	0	0	3	0	0	0	0	0	0	0	0	0	0	0	0	0	0	0	0	0	0	0	0	0	0	0	0	0	0	0	0	0	0.003074	0	0	0	0	0	0	0	0	0	0	0	0	0	0
OTU000359	3	0	0	0	0	0	0	0	0	0	2	0	0	0	0	0	0	0	0	0	0	0	0	0	0	0	0	0	0	0	1	0	0	0	0	0	0	0	0	0	0.002201	0	0	0	0	0	0	0	0
OTU000360	3	0	0	3	0	0	0	0	0	0	0	0	0	0	0	0	0	0	0	0	0	0	0	0	0	0	0	0	0	0	0	0	0	0.00294	0	0	0	0	0	0	0	0	0	0	0	0	0	0	0
OTU000361	3	0	0	0	0	0	0	0	0	3	0	0	0	0	0	0	0	0	0	0	0	0	0	0	0	0	0	0	0	0	0	0	0	0	0	0	0	0	0	0.003026	0	0	0	0	0	0	0	0	0
OTU000362	3	0	0	0	0	0	0	0	0	0	0	0	0	0	0	0	0	0	0	0	0	0	0	0	0	3	0	0	0	0	0	0	0	0	0	0	0	0	0	0	0	0	0	0	0	0	0	0	0
OTU000363	3	0	2	0	0	0	0	0	0	0	0	0	0	0	0	0	0	0	0	0	0	0	1	0	0	0	0	0	0	0	0	0	0.002105	0	0	0	0	0	0	0	0	0	0	0	0	0	0	0	0
OTU000364	3	0	2	0	0	0	0	0	0	0	0	0	0	0	0	0	0	0	0	0	0	0	0	0	0	1	0	0	0	0	0	0	0.002105	0	0	0	0	0	0	0	0	0	0	0	0	0	0	0	0
OTU000365	3	0	0	0	0	0	0	0	0	0	0	0	0	0	0	0	0	3	0	0	0	0	0	0	0	0	0	0	0	0	0	0	0	0	0	0	0	0	0	0	0	0	0	0	0	0	0	0.004266	0
OTU000366	3	0	0	0	0	0	0	0	0	0	0	0	0	2	0	0	0	0	0	0	1	0	0	0	0	0	0	0	0	0	0	0	0	0	0	0	0	0	0	0	0	0	0	0.001995	0	0	0	0	0
OTU000367	3	0	0	0	3	0	0	0	0	0	0	0	0	0	0	0	0	0	0	0	0	0	0	0	0	0	0	0	0	0	0	0	0	0	0.003074	0	0	0	0	0	0	0	0	0	0	0	0	0	0
OTU000368	3	0	0	0	0	0	0	0	3	0	0	0	0	0	0	0	0	0	0	0	0	0	0	0	0	0	0	0	0	0	0	0	0	0	0	0	0	0	0.002918	0	0	0	0	0	0	0	0	0	0
OTU000369	3	0	0	0	0	0	0	0	0	0	3	0	0	0	0	0	0	0	0	0	0	0	0	0	0	0	0	0	0	0	0	0	0	0	0	0	0	0	0	0	0.003302	0	0	0	0	0	0	0	0
OTU000370	3	0	0	0	0	0	0	0	0	0	1	0	0	0	0	0	0	0	0	0	0	0	0	0	0	0	0	0	2	0	0	0	0	0	0	0	0	0	0	0	0.001101	0	0	0	0	0	0	0	0
OTU000371	3	0	0	0	0	0	0	0	0	0	0	0	0	0	0	0	0	0	0	0	3	0	0	0	0	0	0	0	0	0	0	0	0	0	0	0	0	0	0	0	0	0	0	0	0	0	0	0	0
OTU000372	3	0	0	0	0	0	0	0	0	0	0	0	0	0	0	0	0	0	0	0	0	0	0	0	0	0	0	0	3	0	0	0	0	0	0	0	0	0	0	0	0	0	0	0	0	0	0	0	0
OTU000373	3	0	0	0	0	0	0	0	0	0	0	0	0	0	0	0	0	0	2	0	0	0	0	0	0	1	0	0	0	0	0	0	0	0	0	0	0	0	0	0	0	0	0	0	0	0	0	0	0.002632
OTU000374	3	0	0	0	0	0	0	0	0	0	0	0	0	0	0	0	0	0	0	0	0	0	0	0	3	0	0	0	0	0	0	0	0	0	0	0	0	0	0	0	0	0	0	0	0	0	0	0	0
OTU000375	3	0	0	0	0	0	0	0	0	0	0	0	0	0	0	3	0	0	0	0	0	0	0	0	0	0	0	0	0	0	0	0	0	0	0	0	0	0	0	0	0	0	0	0	0	0.003121	0	0	0
OTU000376	3	0	0	0	0	0	0	0	0	0	0	0	0	0	0	0	0	0	2	0	0	0	0	0	0	0	1	0	0	0	0	0	0	0	0	0	0	0	0	0	0	0	0	0	0	0	0	0	0.002632
OTU000377	3	0	0	0	0	0	0	0	0	0	0	0	2	0	0	0	0	0	0	0	0	0	0	0	0	0	0	0	1	0	0	0	0	0	0	0	0	0	0	0	0	0	0.002431	0	0	0	0	0	0
OTU000378	3	0	0	1	0	0	0	0	0	0	0	0	0	0	0	0	0	0	0	0	0	0	0	0	0	0	0	0	0	2	0	0	0	0.00098	0	0	0	0	0	0	0	0	0	0	0	0	0	0	0
OTU000379	3	0	0	0	0	3	0	0	0	0	0	0	0	0	0	0	0	0	0	0	0	0	0	0	0	0	0	0	0	0	0	0	0	0	0	0.002818	0	0	0	0	0	0	0	0	0	0	0	0	0
OTU000380	3	0	0	0	0	0	0	0	0	3	0	0	0	0	0	0	0	0	0	0	0	0	0	0	0	0	0	0	0	0	0	0	0	0	0	0	0	0	0	0.003026	0	0	0	0	0	0	0	0	0
OTU000381	3	0	0	0	0	0	0	0	1	0	0	0	0	0	0	0	0	0	0	0	0	0	0	0	0	2	0	0	0	0	0	0	0	0	0	0	0	0	0.000973	0	0	0	0	0	0	0	0	0	0
OTU000382	3	0	0	0	0	3	0	0	0	0	0	0	0	0	0	0	0	0	0	0	0	0	0	0	0	0	0	0	0	0	0	0	0	0	0	0.002818	0	0	0	0	0	0	0	0	0	0	0	0	0
OTU000383	3	0	0	0	0	0	0	0	0	0	0	0	0	0	0	0	0	0	0	0	0	0	0	0	0	0	0	3	0	0	0	0	0	0	0	0	0	0	0	0	0	0	0	0	0	0	0	0	0
OTU000384	3	0	0	0	0	0	0	0	0	0	0	0	0	0	0	0	0	0	0	0	0	3	0	0	0	0	0	0	0	0	0	0	0	0	0	0	0	0	0	0	0	0	0	0	0	0	0	0	0
OTU000385	3	0	0	0	0	0	0	0	0	0	0	0	0	0	0	0	0	0	0	0	0	0	0	0	0	3	0	0	0	0	0	0	0	0	0	0	0	0	0	0	0	0	0	0	0	0	0	0	0
OTU000386	3	0	0	0	0	0	0	0	0	0	0	2	0	0	0	0	0	0	0	0	0	0	0	0	0	0	0	1	0	0	0	0	0	0	0	0	0	0	0	0	0	0.002075	0	0	0	0	0	0	0
OTU000387	3	0	0	0	0	0	0	0	0	0	0	0	0	0	0	0	2	0	0	0	0	0	0	0	1	0	0	0	0	0	0	0	0	0	0	0	0	0	0	0	0	0	0	0	0	0	0.002456	0	0
OTU000388	3	0	0	0	0	0	0	0	0	0	0	0	0	0	0	0	0	0	0	0	0	0	0	0	3	0	0	0	0	0	0	0	0	0	0	0	0	0	0	0	0	0	0	0	0	0	0	0	0
OTU000389	3	0	0	0	0	0	0	3	0	0	0	0	0	0	0	0	0	0	0	0	0	0	0	0	0	0	0	0	0	0	0	0	0	0	0	0	0	0.003246	0	0	0	0	0	0	0	0	0	0	0
OTU000390	3	0	0	0	0	0	0	0	3	0	0	0	0	0	0	0	0	0	0	0	0	0	0	0	0	0	0	0	0	0	0	0	0	0	0	0	0	0	0.002918	0	0	0	0	0	0	0	0	0	0
OTU000391	3	0	0	0	0	0	0	0	0	0	0	0	0	0	0	0	0	0	0	0	0	0	0	0	0	0	0	0	3	0	0	0	0	0	0	0	0	0	0	0	0	0	0	0	0	0	0	0	0
OTU000392	3	0	0	0	0	0	0	0	0	0	0	0	0	3	0	0	0	0	0	0	0	0	0	0	0	0	0	0	0	0	0	0	0	0	0	0	0	0	0	0	0	0	0	0.002992	0	0	0	0	0
OTU000393	3	0	0	0	0	0	0	0	0	0	1	0	0	0	0	0	0	0	0	0	0	0	0	0	0	2	0	0	0	0	0	0	0	0	0	0	0	0	0	0	0.001101	0	0	0	0	0	0	0	0
OTU000394	3	0	1	0	0	0	0	0	0	0	0	2	0	0	0	0	0	0	0	0	0	0	0	0	0	0	0	0	0	0	0	0	0.001052	0	0	0	0	0	0	0	0	0.002075	0	0	0	0	0	0	0
OTU000395	3	0	0	0	0	0	0	0	1	0	0	0	0	0	2	0	0	0	0	0	0	0	0	0	0	0	0	0	0	0	0	0	0	0	0	0	0	0	0.000973	0	0	0	0	0	0.00205	0	0	0	0
OTU000396	3	0	0	0	0	0	0	0	0	0	2	0	0	0	0	0	0	0	0	0	0	0	0	0	0	1	0	0	0	0	0	0	0	0	0	0	0	0	0	0	0.002201	0	0	0	0	0	0	0	0
OTU000397	3	0	0	0	0	0	0	0	0	0	0	0	0	0	0	0	0	0	0	0	0	0	0	1	0	0	0	0	0	2	0	0	0	0	0	0	0	0	0	0	0	0	0	0	0	0	0	0	0
OTU000398	3	0	0	0	0	0	0	0	0	1	0	0	0	0	0	0	0	0	0	0	0	0	0	0	0	0	0	0	0	2	0	0	0	0	0	0	0	0	0	0.001009	0	0	0	0	0	0	0	0	0
OTU000399	3	0	0	0	0	1	0	0	2	0	0	0	0	0	0	0	0	0	0	0	0	0	0	0	0	0	0	0	0	0	0	0	0	0	0	0.000939	0	0	0.001945	0	0	0	0	0	0	0	0	0	0
OTU000400	3	0	0	0	0	0	0	0	0	0	0	0	0	0	0	0	0	2	0	0	0	0	0	0	0	1	0	0	0	0	0	0	0	0	0	0	0	0	0	0	0	0	0	0	0	0	0	0.002844	0
OTU000401	3	0	0	0	3	0	0	0	0	0	0	0	0	0	0	0	0	0	0	0	0	0	0	0	0	0	0	0	0	0	0	0	0	0	0.003074	0	0	0	0	0	0	0	0	0	0	0	0	0	0
OTU000402	3	0	0	0	0	0	0	0	0	0	0	0	0	0	0	0	0	0	0	0	0	0	0	0	0	0	0	0	1	0	2	0	0	0	0	0	0	0	0	0	0	0	0	0	0	0	0	0	0
OTU000403	3	0	0	0	0	0	0	0	0	0	0	0	0	0	0	0	0	0	0	0	0	0	0	0	0	0	0	0	3	0	0	0	0	0	0	0	0	0	0	0	0	0	0	0	0	0	0	0	0
OTU000404	3	0	0	0	0	0	0	0	0	0	1	0	0	0	0	0	0	0	0	2	0	0	0	0	0	0	0	0	0	0	0	0	0	0	0	0	0	0	0	0	0.001101	0	0	0	0	0	0	0	0
OTU000405	3	0	0	0	0	0	0	0	0	0	0	0	0	0	0	0	0	0	1	0	0	0	0	0	0	2	0	0	0	0	0	0	0	0	0	0	0	0	0	0	0	0	0	0	0	0	0	0	0.001316
OTU000406	2	0	0	0	0	2	0	0	0	0	0	0	0	0	0	0	0	0	0	0	0	0	0	0	0	0	0	0	0	0	0	0	0	0	0	0.001879	0	0	0	0	0	0	0	0	0	0	0	0	0
OTU000407	2	2	0	0	0	0	0	0	0	0	0	0	0	0	0	0	0	0	0	0	0	0	0	0	0	0	0	0	0	0	0	0.002463	0	0	0	0	0	0	0	0	0	0	0	0	0	0	0	0	0
OTU000408	2	0	0	0	0	0	0	0	0	0	0	0	0	0	0	0	0	0	0	0	2	0	0	0	0	0	0	0	0	0	0	0	0	0	0	0	0	0	0	0	0	0	0	0	0	0	0	0	0
OTU000409	2	0	0	0	0	0	0	0	0	0	0	0	0	0	0	0	2	0	0	0	0	0	0	0	0	0	0	0	0	0	0	0	0	0	0	0	0	0	0	0	0	0	0	0	0	0	0.002456	0	0
OTU000410	2	0	0	0	0	0	0	0	0	0	0	0	0	2	0	0	0	0	0	0	0	0	0	0	0	0	0	0	0	0	0	0	0	0	0	0	0	0	0	0	0	0	0	0.001995	0	0	0	0	0
OTU000411	2	0	0	0	0	0	0	0	0	0	0	0	0	0	0	0	0	0	0	0	0	0	0	0	0	2	0	0	0	0	0	0	0	0	0	0	0	0	0	0	0	0	0	0	0	0	0	0	0
OTU000412	2	0	0	0	0	0	0	0	0	0	0	0	0	0	0	0	0	0	0	0	0	0	0	0	0	0	0	0	0	0	2	0	0	0	0	0	0	0	0	0	0	0	0	0	0	0	0	0	0
OTU000413	2	0	0	0	0	0	0	0	0	0	2	0	0	0	0	0	0	0	0	0	0	0	0	0	0	0	0	0	0	0	0	0	0	0	0	0	0	0	0	0	0.002201	0	0	0	0	0	0	0	0
OTU000414	2	0	0	2	0	0	0	0	0	0	0	0	0	0	0	0	0	0	0	0	0	0	0	0	0	0	0	0	0	0	0	0	0	0.00196	0	0	0	0	0	0	0	0	0	0	0	0	0	0	0
OTU000415	2	2	0	0	0	0	0	0	0	0	0	0	0	0	0	0	0	0	0	0	0	0	0	0	0	0	0	0	0	0	0	0.002463	0	0	0	0	0	0	0	0	0	0	0	0	0	0	0	0	0
OTU000416	2	0	0	0	0	0	0	2	0	0	0	0	0	0	0	0	0	0	0	0	0	0	0	0	0	0	0	0	0	0	0	0	0	0	0	0	0	0.002164	0	0	0	0	0	0	0	0	0	0	0
OTU000417	2	0	0	0	0	0	0	0	0	0	2	0	0	0	0	0	0	0	0	0	0	0	0	0	0	0	0	0	0	0	0	0	0	0	0	0	0	0	0	0	0.002201	0	0	0	0	0	0	0	0
OTU000418	2	0	0	0	0	0	0	0	0	0	0	0	0	0	0	0	0	0	0	0	0	0	0	0	0	0	2	0	0	0	0	0	0	0	0	0	0	0	0	0	0	0	0	0	0	0	0	0	0
OTU000419	2	0	0	0	0	0	0	0	0	0	0	0	0	0	0	0	0	0	0	0	0	0	0	0	0	2	0	0	0	0	0	0	0	0	0	0	0	0	0	0	0	0	0	0	0	0	0	0	0
OTU000420	2	0	0	0	0	0	0	0	0	0	0	0	0	0	2	0	0	0	0	0	0	0	0	0	0	0	0	0	0	0	0	0	0	0	0	0	0	0	0	0	0	0	0	0	0.00205	0	0	0	0
OTU000421	2	0	0	0	0	0	0	0	0	0	0	0	0	0	0	2	0	0	0	0	0	0	0	0	0	0	0	0	0	0	0	0	0	0	0	0	0	0	0	0	0	0	0	0	0	0.002081	0	0	0
OTU000422	2	0	0	0	0	0	0	0	0	0	0	0	0	0	0	0	0	0	0	0	0	0	0	0	0	0	2	0	0	0	0	0	0	0	0	0	0	0	0	0	0	0	0	0	0	0	0	0	0
OTU000423	2	0	0	0	0	0	0	0	0	0	2	0	0	0	0	0	0	0	0	0	0	0	0	0	0	0	0	0	0	0	0	0	0	0	0	0	0	0	0	0	0.002201	0	0	0	0	0	0	0	0
OTU000424	2	0	0	0	0	0	0	0	0	0	0	0	0	0	0	0	0	0	0	0	2	0	0	0	0	0	0	0	0	0	0	0	0	0	0	0	0	0	0	0	0	0	0	0	0	0	0	0	0
OTU000425	2	0	0	0	0	0	0	0	0	0	0	0	0	0	0	0	0	0	0	0	0	0	0	0	0	0	2	0	0	0	0	0	0	0	0	0	0	0	0	0	0	0	0	0	0	0	0	0	0
OTU000426	2	0	0	0	0	0	0	0	0	0	0	0	0	0	0	0	0	0	0	0	0	0	0	2	0	0	0	0	0	0	0	0	0	0	0	0	0	0	0	0	0	0	0	0	0	0	0	0	0
OTU000427	2	0	0	2	0	0	0	0	0	0	0	0	0	0	0	0	0	0	0	0	0	0	0	0	0	0	0	0	0	0	0	0	0	0.00196	0	0	0	0	0	0	0	0	0	0	0	0	0	0	0
OTU000428	2	0	0	0	0	0	0	0	0	0	0	0	0	0	0	0	0	0	0	0	2	0	0	0	0	0	0	0	0	0	0	0	0	0	0	0	0	0	0	0	0	0	0	0	0	0	0	0	0
OTU000429	2	2	0	0	0	0	0	0	0	0	0	0	0	0	0	0	0	0	0	0	0	0	0	0	0	0	0	0	0	0	0	0.002463	0	0	0	0	0	0	0	0	0	0	0	0	0	0	0	0	0
OTU000430	2	0	0	0	0	0	0	0	0	0	0	0	0	0	0	0	0	0	0	0	0	0	0	0	2	0	0	0	0	0	0	0	0	0	0	0	0	0	0	0	0	0	0	0	0	0	0	0	0
OTU000431	2	0	0	0	0	0	0	0	2	0	0	0	0	0	0	0	0	0	0	0	0	0	0	0	0	0	0	0	0	0	0	0	0	0	0	0	0	0	0.001945	0	0	0	0	0	0	0	0	0	0
OTU000432	2	0	0	0	0	0	2	0	0	0	0	0	0	0	0	0	0	0	0	0	0	0	0	0	0	0	0	0	0	0	0	0	0	0	0	0	0.00254	0	0	0	0	0	0	0	0	0	0	0	0
OTU000433	2	0	0	0	0	0	2	0	0	0	0	0	0	0	0	0	0	0	0	0	0	0	0	0	0	0	0	0	0	0	0	0	0	0	0	0	0.00254	0	0	0	0	0	0	0	0	0	0	0	0
OTU000434	2	0	0	0	0	0	0	0	0	0	0	0	0	0	0	0	0	0	0	2	0	0	0	0	0	0	0	0	0	0	0	0	0	0	0	0	0	0	0	0	0	0	0	0	0	0	0	0	0
OTU000435	2	0	0	0	0	0	2	0	0	0	0	0	0	0	0	0	0	0	0	0	0	0	0	0	0	0	0	0	0	0	0	0	0	0	0	0	0.00254	0	0	0	0	0	0	0	0	0	0	0	0
OTU000436	2	0	0	0	0	0	0	0	0	0	0	0	0	0	0	0	0	0	0	0	0	0	0	0	0	0	0	0	0	0	2	0	0	0	0	0	0	0	0	0	0	0	0	0	0	0	0	0	0
OTU000437	2	0	0	0	0	2	0	0	0	0	0	0	0	0	0	0	0	0	0	0	0	0	0	0	0	0	0	0	0	0	0	0	0	0	0	0.001879	0	0	0	0	0	0	0	0	0	0	0	0	0
OTU000438	2	0	0	0	0	0	0	0	0	0	0	0	0	0	0	0	0	0	0	0	0	2	0	0	0	0	0	0	0	0	0	0	0	0	0	0	0	0	0	0	0	0	0	0	0	0	0	0	0
OTU000439	2	0	0	0	0	0	0	0	0	0	2	0	0	0	0	0	0	0	0	0	0	0	0	0	0	0	0	0	0	0	0	0	0	0	0	0	0	0	0	0	0.002201	0	0	0	0	0	0	0	0
OTU000440	2	0	0	0	0	0	0	0	0	0	0	0	0	0	0	0	0	0	0	0	0	0	0	0	2	0	0	0	0	0	0	0	0	0	0	0	0	0	0	0	0	0	0	0	0	0	0	0	0
OTU000441	2	0	0	0	0	0	0	0	0	0	0	0	0	2	0	0	0	0	0	0	0	0	0	0	0	0	0	0	0	0	0	0	0	0	0	0	0	0	0	0	0	0	0	0.001995	0	0	0	0	0
OTU000442	2	0	2	0	0	0	0	0	0	0	0	0	0	0	0	0	0	0	0	0	0	0	0	0	0	0	0	0	0	0	0	0	0.002105	0	0	0	0	0	0	0	0	0	0	0	0	0	0	0	0
OTU000443	2	0	0	0	0	0	0	0	0	0	0	0	0	0	0	0	0	0	0	0	2	0	0	0	0	0	0	0	0	0	0	0	0	0	0	0	0	0	0	0	0	0	0	0	0	0	0	0	0
OTU000444	2	0	0	0	0	0	0	0	0	0	0	0	0	0	0	0	0	2	0	0	0	0	0	0	0	0	0	0	0	0	0	0	0	0	0	0	0	0	0	0	0	0	0	0	0	0	0	0.002844	0
OTU000445	2	2	0	0	0	0	0	0	0	0	0	0	0	0	0	0	0	0	0	0	0	0	0	0	0	0	0	0	0	0	0	0.002463	0	0	0	0	0	0	0	0	0	0	0	0	0	0	0	0	0
OTU000446	2	0	0	0	0	2	0	0	0	0	0	0	0	0	0	0	0	0	0	0	0	0	0	0	0	0	0	0	0	0	0	0	0	0	0	0.001879	0	0	0	0	0	0	0	0	0	0	0	0	0
OTU000447	2	0	0	0	0	0	0	0	0	0	0	0	0	0	0	0	0	0	0	0	2	0	0	0	0	0	0	0	0	0	0	0	0	0	0	0	0	0	0	0	0	0	0	0	0	0	0	0	0
OTU000448	2	0	0	0	0	0	0	0	0	0	0	0	0	0	0	0	0	0	0	0	0	0	0	0	0	0	0	0	0	0	2	0	0	0	0	0	0	0	0	0	0	0	0	0	0	0	0	0	0
OTU000449	2	0	0	0	0	0	0	0	0	0	0	0	0	0	0	0	0	0	0	2	0	0	0	0	0	0	0	0	0	0	0	0	0	0	0	0	0	0	0	0	0	0	0	0	0	0	0	0	0
OTU000450	2	0	0	0	0	2	0	0	0	0	0	0	0	0	0	0	0	0	0	0	0	0	0	0	0	0	0	0	0	0	0	0	0	0	0	0.001879	0	0	0	0	0	0	0	0	0	0	0	0	0
OTU000451	2	0	2	0	0	0	0	0	0	0	0	0	0	0	0	0	0	0	0	0	0	0	0	0	0	0	0	0	0	0	0	0	0.002105	0	0	0	0	0	0	0	0	0	0	0	0	0	0	0	0
OTU000452	2	0	0	0	0	0	0	0	0	0	0	0	0	0	0	0	0	0	0	2	0	0	0	0	0	0	0	0	0	0	0	0	0	0	0	0	0	0	0	0	0	0	0	0	0	0	0	0	0
OTU000453	2	0	0	0	0	2	0	0	0	0	0	0	0	0	0	0	0	0	0	0	0	0	0	0	0	0	0	0	0	0	0	0	0	0	0	0.001879	0	0	0	0	0	0	0	0	0	0	0	0	0
OTU000454	2	0	0	0	0	0	0	0	0	0	0	0	0	0	0	0	0	0	0	0	0	0	0	2	0	0	0	0	0	0	0	0	0	0	0	0	0	0	0	0	0	0	0	0	0	0	0	0	0
OTU000455	2	0	0	0	0	0	0	0	0	0	0	0	0	0	0	0	0	0	0	0	0	0	0	0	0	0	0	2	0	0	0	0	0	0	0	0	0	0	0	0	0	0	0	0	0	0	0	0	0
OTU000456	2	0	0	0	0	0	0	0	0	0	0	0	2	0	0	0	0	0	0	0	0	0	0	0	0	0	0	0	0	0	0	0	0	0	0	0	0	0	0	0	0	0	0.002431	0	0	0	0	0	0
OTU000457	2	0	0	0	0	0	0	0	0	0	2	0	0	0	0	0	0	0	0	0	0	0	0	0	0	0	0	0	0	0	0	0	0	0	0	0	0	0	0	0	0.002201	0	0	0	0	0	0	0	0
OTU000458	2	0	0	0	0	0	0	0	0	0	0	0	0	0	0	0	0	0	0	0	0	0	0	0	0	0	2	0	0	0	0	0	0	0	0	0	0	0	0	0	0	0	0	0	0	0	0	0	0
OTU000459	2	0	0	0	0	0	0	0	0	0	2	0	0	0	0	0	0	0	0	0	0	0	0	0	0	0	0	0	0	0	0	0	0	0	0	0	0	0	0	0	0.002201	0	0	0	0	0	0	0	0
OTU000460	2	0	0	0	0	0	0	0	2	0	0	0	0	0	0	0	0	0	0	0	0	0	0	0	0	0	0	0	0	0	0	0	0	0	0	0	0	0	0.001945	0	0	0	0	0	0	0	0	0	0
OTU000461	2	0	0	0	2	0	0	0	0	0	0	0	0	0	0	0	0	0	0	0	0	0	0	0	0	0	0	0	0	0	0	0	0	0	0.002049	0	0	0	0	0	0	0	0	0	0	0	0	0	0
OTU000462	2	0	0	0	0	0	0	0	0	2	0	0	0	0	0	0	0	0	0	0	0	0	0	0	0	0	0	0	0	0	0	0	0	0	0	0	0	0	0	0.002017	0	0	0	0	0	0	0	0	0
OTU000463	2	0	0	0	0	0	0	0	0	0	0	0	0	0	0	0	0	0	0	0	0	2	0	0	0	0	0	0	0	0	0	0	0	0	0	0	0	0	0	0	0	0	0	0	0	0	0	0	0
OTU000464	2	0	0	0	2	0	0	0	0	0	0	0	0	0	0	0	0	0	0	0	0	0	0	0	0	0	0	0	0	0	0	0	0	0	0.002049	0	0	0	0	0	0	0	0	0	0	0	0	0	0
OTU000465	2	0	0	0	0	0	0	0	0	0	2	0	0	0	0	0	0	0	0	0	0	0	0	0	0	0	0	0	0	0	0	0	0	0	0	0	0	0	0	0	0.002201	0	0	0	0	0	0	0	0
OTU000466	2	0	0	0	0	2	0	0	0	0	0	0	0	0	0	0	0	0	0	0	0	0	0	0	0	0	0	0	0	0	0	0	0	0	0	0.001879	0	0	0	0	0	0	0	0	0	0	0	0	0
OTU000467	2	0	0	0	0	0	0	0	0	0	0	2	0	0	0	0	0	0	0	0	0	0	0	0	0	0	0	0	0	0	0	0	0	0	0	0	0	0	0	0	0	0.002075	0	0	0	0	0	0	0
OTU000468	2	0	0	0	0	0	0	0	0	0	2	0	0	0	0	0	0	0	0	0	0	0	0	0	0	0	0	0	0	0	0	0	0	0	0	0	0	0	0	0	0.002201	0	0	0	0	0	0	0	0
OTU000469	2	0	0	0	0	0	0	0	0	0	0	0	0	0	0	0	0	0	0	0	0	0	0	0	2	0	0	0	0	0	0	0	0	0	0	0	0	0	0	0	0	0	0	0	0	0	0	0	0
OTU000470	2	0	0	0	0	0	0	0	2	0	0	0	0	0	0	0	0	0	0	0	0	0	0	0	0	0	0	0	0	0	0	0	0	0	0	0	0	0	0.001945	0	0	0	0	0	0	0	0	0	0
OTU000471	2	0	0	0	0	0	0	0	0	0	0	0	0	0	0	0	0	0	0	0	0	0	0	0	0	0	0	0	0	2	0	0	0	0	0	0	0	0	0	0	0	0	0	0	0	0	0	0	0
OTU000472	2	0	0	0	0	0	0	0	0	0	0	0	0	0	0	2	0	0	0	0	0	0	0	0	0	0	0	0	0	0	0	0	0	0	0	0	0	0	0	0	0	0	0	0	0	0.002081	0	0	0
OTU000473	2	0	0	0	0	0	0	0	0	0	0	0	0	0	0	0	0	0	0	0	0	0	0	0	0	2	0	0	0	0	0	0	0	0	0	0	0	0	0	0	0	0	0	0	0	0	0	0	0
OTU000474	2	0	0	0	0	0	0	0	0	0	0	0	0	0	0	0	0	0	0	0	0	0	0	2	0	0	0	0	0	0	0	0	0	0	0	0	0	0	0	0	0	0	0	0	0	0	0	0	0
OTU000475	2	0	0	0	0	0	0	0	0	0	0	0	0	0	0	0	0	0	0	0	0	0	0	0	0	0	2	0	0	0	0	0	0	0	0	0	0	0	0	0	0	0	0	0	0	0	0	0	0
OTU000476	2	0	0	0	0	0	0	0	0	0	0	0	0	0	0	0	0	0	0	0	0	0	0	0	0	0	0	0	0	0	2	0	0	0	0	0	0	0	0	0	0	0	0	0	0	0	0	0	0
OTU000477	2	0	0	0	0	0	0	0	0	0	0	2	0	0	0	0	0	0	0	0	0	0	0	0	0	0	0	0	0	0	0	0	0	0	0	0	0	0	0	0	0	0.002075	0	0	0	0	0	0	0
OTU000478	2	2	0	0	0	0	0	0	0	0	0	0	0	0	0	0	0	0	0	0	0	0	0	0	0	0	0	0	0	0	0	0.002463	0	0	0	0	0	0	0	0	0	0	0	0	0	0	0	0	0
OTU000479	2	0	0	0	0	0	0	0	0	0	0	0	0	0	0	0	0	0	0	0	0	0	0	0	0	2	0	0	0	0	0	0	0	0	0	0	0	0	0	0	0	0	0	0	0	0	0	0	0
OTU000480	2	0	0	0	0	0	0	0	0	0	0	0	2	0	0	0	0	0	0	0	0	0	0	0	0	0	0	0	0	0	0	0	0	0	0	0	0	0	0	0	0	0	0.002431	0	0	0	0	0	0
OTU000481	2	0	0	0	0	0	0	0	0	0	0	0	0	0	0	0	0	0	0	0	0	0	0	0	0	2	0	0	0	0	0	0	0	0	0	0	0	0	0	0	0	0	0	0	0	0	0	0	0
OTU000482	2	0	0	0	0	0	0	0	0	0	0	0	0	0	2	0	0	0	0	0	0	0	0	0	0	0	0	0	0	0	0	0	0	0	0	0	0	0	0	0	0	0	0	0	0.00205	0	0	0	0
OTU000483	2	0	0	0	0	2	0	0	0	0	0	0	0	0	0	0	0	0	0	0	0	0	0	0	0	0	0	0	0	0	0	0	0	0	0	0.001879	0	0	0	0	0	0	0	0	0	0	0	0	0
OTU000484	2	0	0	0	0	0	0	0	0	0	0	0	0	0	0	0	0	0	0	0	0	0	0	0	0	0	0	2	0	0	0	0	0	0	0	0	0	0	0	0	0	0	0	0	0	0	0	0	0
OTU000485	2	0	0	2	0	0	0	0	0	0	0	0	0	0	0	0	0	0	0	0	0	0	0	0	0	0	0	0	0	0	0	0	0	0.00196	0	0	0	0	0	0	0	0	0	0	0	0	0	0	0
OTU000486	2	0	0	0	0	0	0	0	0	0	0	0	0	2	0	0	0	0	0	0	0	0	0	0	0	0	0	0	0	0	0	0	0	0	0	0	0	0	0	0	0	0	0	0.001995	0	0	0	0	0
OTU000487	2	0	0	0	0	0	0	0	0	0	0	0	0	0	0	0	0	0	0	0	0	0	2	0	0	0	0	0	0	0	0	0	0	0	0	0	0	0	0	0	0	0	0	0	0	0	0	0	0
OTU000488	2	0	0	0	0	0	0	0	0	0	0	0	0	0	0	0	0	0	0	0	0	0	0	0	0	2	0	0	0	0	0	0	0	0	0	0	0	0	0	0	0	0	0	0	0	0	0	0	0
OTU000489	2	0	0	0	0	0	0	0	0	0	0	2	0	0	0	0	0	0	0	0	0	0	0	0	0	0	0	0	0	0	0	0	0	0	0	0	0	0	0	0	0	0.002075	0	0	0	0	0	0	0
OTU000490	2	0	0	2	0	0	0	0	0	0	0	0	0	0	0	0	0	0	0	0	0	0	0	0	0	0	0	0	0	0	0	0	0	0.00196	0	0	0	0	0	0	0	0	0	0	0	0	0	0	0
OTU000491	2	0	0	0	0	0	0	0	0	0	0	0	0	0	2	0	0	0	0	0	0	0	0	0	0	0	0	0	0	0	0	0	0	0	0	0	0	0	0	0	0	0	0	0	0.00205	0	0	0	0
OTU000492	2	0	0	0	0	0	0	0	0	0	0	0	0	0	0	0	0	0	0	0	0	0	0	0	0	0	0	2	0	0	0	0	0	0	0	0	0	0	0	0	0	0	0	0	0	0	0	0	0
OTU000493	2	0	0	0	0	0	0	2	0	0	0	0	0	0	0	0	0	0	0	0	0	0	0	0	0	0	0	0	0	0	0	0	0	0	0	0	0	0.002164	0	0	0	0	0	0	0	0	0	0	0
OTU000494	2	0	2	0	0	0	0	0	0	0	0	0	0	0	0	0	0	0	0	0	0	0	0	0	0	0	0	0	0	0	0	0	0.002105	0	0	0	0	0	0	0	0	0	0	0	0	0	0	0	0
OTU000495	2	0	0	0	0	0	0	0	0	0	0	0	0	0	0	0	0	0	0	2	0	0	0	0	0	0	0	0	0	0	0	0	0	0	0	0	0	0	0	0	0	0	0	0	0	0	0	0	0
OTU000496	2	0	0	0	0	0	0	0	0	0	0	0	0	0	0	0	0	0	0	0	0	0	2	0	0	0	0	0	0	0	0	0	0	0	0	0	0	0	0	0	0	0	0	0	0	0	0	0	0
OTU000497	2	0	0	0	0	0	0	2	0	0	0	0	0	0	0	0	0	0	0	0	0	0	0	0	0	0	0	0	0	0	0	0	0	0	0	0	0	0.002164	0	0	0	0	0	0	0	0	0	0	0
OTU000498	2	0	0	0	0	0	0	0	0	0	0	0	0	0	0	0	0	0	0	0	0	0	0	0	2	0	0	0	0	0	0	0	0	0	0	0	0	0	0	0	0	0	0	0	0	0	0	0	0
OTU000499	2	0	2	0	0	0	0	0	0	0	0	0	0	0	0	0	0	0	0	0	0	0	0	0	0	0	0	0	0	0	0	0	0.002105	0	0	0	0	0	0	0	0	0	0	0	0	0	0	0	0
OTU000500	2	0	0	0	0	0	0	0	0	0	0	0	0	0	0	0	0	0	0	0	0	2	0	0	0	0	0	0	0	0	0	0	0	0	0	0	0	0	0	0	0	0	0	0	0	0	0	0	0
OTU000501	2	0	0	0	0	0	0	0	0	0	0	0	0	0	0	0	0	0	0	0	0	0	0	0	0	0	0	2	0	0	0	0	0	0	0	0	0	0	0	0	0	0	0	0	0	0	0	0	0
OTU000502	2	0	0	0	0	2	0	0	0	0	0	0	0	0	0	0	0	0	0	0	0	0	0	0	0	0	0	0	0	0	0	0	0	0	0	0.001879	0	0	0	0	0	0	0	0	0	0	0	0	0
OTU000503	2	0	0	0	0	0	0	0	0	0	2	0	0	0	0	0	0	0	0	0	0	0	0	0	0	0	0	0	0	0	0	0	0	0	0	0	0	0	0	0	0.002201	0	0	0	0	0	0	0	0
OTU000504	2	0	0	0	0	0	0	0	0	0	0	0	0	0	0	0	0	2	0	0	0	0	0	0	0	0	0	0	0	0	0	0	0	0	0	0	0	0	0	0	0	0	0	0	0	0	0	0.002844	0
OTU000505	2	0	0	0	0	0	0	0	0	0	0	0	0	0	0	0	0	0	0	0	0	0	0	0	0	0	0	0	0	0	2	0	0	0	0	0	0	0	0	0	0	0	0	0	0	0	0	0	0
OTU000506	2	0	0	0	0	0	0	0	0	0	0	0	0	0	0	0	0	0	0	0	0	0	0	0	0	0	0	0	2	0	0	0	0	0	0	0	0	0	0	0	0	0	0	0	0	0	0	0	0
OTU000507	2	0	0	0	0	0	0	0	0	0	0	0	0	0	0	0	0	0	0	0	0	0	0	2	0	0	0	0	0	0	0	0	0	0	0	0	0	0	0	0	0	0	0	0	0	0	0	0	0
OTU000508	2	0	0	0	0	0	2	0	0	0	0	0	0	0	0	0	0	0	0	0	0	0	0	0	0	0	0	0	0	0	0	0	0	0	0	0	0.00254	0	0	0	0	0	0	0	0	0	0	0	0
OTU000509	2	0	2	0	0	0	0	0	0	0	0	0	0	0	0	0	0	0	0	0	0	0	0	0	0	0	0	0	0	0	0	0	0.002105	0	0	0	0	0	0	0	0	0	0	0	0	0	0	0	0
OTU000510	2	0	0	0	0	0	0	0	0	2	0	0	0	0	0	0	0	0	0	0	0	0	0	0	0	0	0	0	0	0	0	0	0	0	0	0	0	0	0	0.002017	0	0	0	0	0	0	0	0	0
OTU000511	2	0	0	0	0	0	0	0	0	0	0	0	0	0	0	0	0	0	0	0	0	0	0	0	0	0	0	0	0	0	2	0	0	0	0	0	0	0	0	0	0	0	0	0	0	0	0	0	0
OTU000512	2	0	0	0	0	0	0	2	0	0	0	0	0	0	0	0	0	0	0	0	0	0	0	0	0	0	0	0	0	0	0	0	0	0	0	0	0	0.002164	0	0	0	0	0	0	0	0	0	0	0
OTU000513	2	0	0	0	0	0	0	0	0	0	0	0	0	0	0	0	0	0	0	0	0	0	0	0	2	0	0	0	0	0	0	0	0	0	0	0	0	0	0	0	0	0	0	0	0	0	0	0	0
OTU000514	2	0	0	0	0	0	0	0	0	0	0	0	0	0	0	0	0	0	2	0	0	0	0	0	0	0	0	0	0	0	0	0	0	0	0	0	0	0	0	0	0	0	0	0	0	0	0	0	0.002632
OTU000515	2	0	2	0	0	0	0	0	0	0	0	0	0	0	0	0	0	0	0	0	0	0	0	0	0	0	0	0	0	0	0	0	0.002105	0	0	0	0	0	0	0	0	0	0	0	0	0	0	0	0
OTU000516	2	0	0	0	0	0	0	0	0	0	0	0	0	0	0	0	2	0	0	0	0	0	0	0	0	0	0	0	0	0	0	0	0	0	0	0	0	0	0	0	0	0	0	0	0	0	0.002456	0	0
OTU000517	2	0	0	0	0	0	0	0	0	0	0	0	0	0	0	0	0	0	0	0	0	0	2	0	0	0	0	0	0	0	0	0	0	0	0	0	0	0	0	0	0	0	0	0	0	0	0	0	0
OTU000518	2	0	0	0	0	0	0	0	0	0	0	0	0	0	0	0	0	0	0	0	0	0	0	0	2	0	0	0	0	0	0	0	0	0	0	0	0	0	0	0	0	0	0	0	0	0	0	0	0
OTU000519	2	0	0	0	0	0	0	0	0	0	0	0	0	0	0	0	0	0	0	0	0	2	0	0	0	0	0	0	0	0	0	0	0	0	0	0	0	0	0	0	0	0	0	0	0	0	0	0	0
OTU000520	2	0	0	0	0	0	0	0	0	0	0	0	0	0	0	0	0	2	0	0	0	0	0	0	0	0	0	0	0	0	0	0	0	0	0	0	0	0	0	0	0	0	0	0	0	0	0	0.002844	0
OTU000521	2	0	0	0	0	0	0	0	0	2	0	0	0	0	0	0	0	0	0	0	0	0	0	0	0	0	0	0	0	0	0	0	0	0	0	0	0	0	0	0.002017	0	0	0	0	0	0	0	0	0
OTU000522	2	0	0	0	0	2	0	0	0	0	0	0	0	0	0	0	0	0	0	0	0	0	0	0	0	0	0	0	0	0	0	0	0	0	0	0.001879	0	0	0	0	0	0	0	0	0	0	0	0	0
OTU000523	2	2	0	0	0	0	0	0	0	0	0	0	0	0	0	0	0	0	0	0	0	0	0	0	0	0	0	0	0	0	0	0.002463	0	0	0	0	0	0	0	0	0	0	0	0	0	0	0	0	0
OTU000524	2	0	2	0	0	0	0	0	0	0	0	0	0	0	0	0	0	0	0	0	0	0	0	0	0	0	0	0	0	0	0	0	0.002105	0	0	0	0	0	0	0	0	0	0	0	0	0	0	0	0
OTU000525	2	0	0	0	2	0	0	0	0	0	0	0	0	0	0	0	0	0	0	0	0	0	0	0	0	0	0	0	0	0	0	0	0	0	0.002049	0	0	0	0	0	0	0	0	0	0	0	0	0	0
OTU000526	2	0	0	2	0	0	0	0	0	0	0	0	0	0	0	0	0	0	0	0	0	0	0	0	0	0	0	0	0	0	0	0	0	0.00196	0	0	0	0	0	0	0	0	0	0	0	0	0	0	0
OTU000527	2	0	0	0	0	0	0	0	0	0	0	0	0	0	0	0	0	0	0	0	0	0	0	0	0	2	0	0	0	0	0	0	0	0	0	0	0	0	0	0	0	0	0	0	0	0	0	0	0
OTU000528	2	0	0	0	0	0	0	0	0	0	0	0	0	0	0	0	0	0	0	0	0	0	0	0	0	2	0	0	0	0	0	0	0	0	0	0	0	0	0	0	0	0	0	0	0	0	0	0	0
OTU000529	2	2	0	0	0	0	0	0	0	0	0	0	0	0	0	0	0	0	0	0	0	0	0	0	0	0	0	0	0	0	0	0.002463	0	0	0	0	0	0	0	0	0	0	0	0	0	0	0	0	0
OTU000530	2	0	0	0	0	0	0	0	0	0	0	0	0	0	0	0	0	0	0	0	2	0	0	0	0	0	0	0	0	0	0	0	0	0	0	0	0	0	0	0	0	0	0	0	0	0	0	0	0
OTU000531	2	0	0	0	2	0	0	0	0	0	0	0	0	0	0	0	0	0	0	0	0	0	0	0	0	0	0	0	0	0	0	0	0	0	0.002049	0	0	0	0	0	0	0	0	0	0	0	0	0	0
OTU000532	2	0	0	0	0	0	0	0	0	0	0	0	0	0	0	0	0	0	0	0	0	0	0	0	0	0	0	0	0	2	0	0	0	0	0	0	0	0	0	0	0	0	0	0	0	0	0	0	0
OTU000533	2	0	0	0	0	2	0	0	0	0	0	0	0	0	0	0	0	0	0	0	0	0	0	0	0	0	0	0	0	0	0	0	0	0	0	0.001879	0	0	0	0	0	0	0	0	0	0	0	0	0
OTU000534	2	0	0	0	2	0	0	0	0	0	0	0	0	0	0	0	0	0	0	0	0	0	0	0	0	0	0	0	0	0	0	0	0	0	0.002049	0	0	0	0	0	0	0	0	0	0	0	0	0	0
OTU000535	2	0	0	0	0	0	0	0	0	0	0	0	0	0	0	0	0	0	0	0	0	0	0	0	0	0	0	2	0	0	0	0	0	0	0	0	0	0	0	0	0	0	0	0	0	0	0	0	0
OTU000536	2	0	0	0	0	0	0	0	0	0	0	0	0	2	0	0	0	0	0	0	0	0	0	0	0	0	0	0	0	0	0	0	0	0	0	0	0	0	0	0	0	0	0	0.001995	0	0	0	0	0
OTU000537	2	0	0	0	0	0	0	0	0	0	0	0	0	0	2	0	0	0	0	0	0	0	0	0	0	0	0	0	0	0	0	0	0	0	0	0	0	0	0	0	0	0	0	0	0.00205	0	0	0	0
OTU000538	2	0	0	0	0	0	0	0	0	0	0	0	0	0	0	0	0	0	0	0	0	2	0	0	0	0	0	0	0	0	0	0	0	0	0	0	0	0	0	0	0	0	0	0	0	0	0	0	0
OTU000539	2	0	0	0	2	0	0	0	0	0	0	0	0	0	0	0	0	0	0	0	0	0	0	0	0	0	0	0	0	0	0	0	0	0	0.002049	0	0	0	0	0	0	0	0	0	0	0	0	0	0
OTU000540	2	0	0	0	0	0	0	0	0	0	0	0	0	0	0	0	0	0	2	0	0	0	0	0	0	0	0	0	0	0	0	0	0	0	0	0	0	0	0	0	0	0	0	0	0	0	0	0	0.002632
OTU000541	2	0	0	2	0	0	0	0	0	0	0	0	0	0	0	0	0	0	0	0	0	0	0	0	0	0	0	0	0	0	0	0	0	0.00196	0	0	0	0	0	0	0	0	0	0	0	0	0	0	0
OTU000542	2	0	0	0	0	0	0	0	0	0	0	0	0	2	0	0	0	0	0	0	0	0	0	0	0	0	0	0	0	0	0	0	0	0	0	0	0	0	0	0	0	0	0	0.001995	0	0	0	0	0
OTU000543	2	0	0	0	0	0	0	0	0	0	0	0	0	0	0	0	0	0	2	0	0	0	0	0	0	0	0	0	0	0	0	0	0	0	0	0	0	0	0	0	0	0	0	0	0	0	0	0	0.002632
OTU000544	2	0	0	0	0	0	0	0	0	0	0	0	0	0	0	0	0	0	0	0	2	0	0	0	0	0	0	0	0	0	0	0	0	0	0	0	0	0	0	0	0	0	0	0	0	0	0	0	0
OTU000545	2	0	2	0	0	0	0	0	0	0	0	0	0	0	0	0	0	0	0	0	0	0	0	0	0	0	0	0	0	0	0	0	0.002105	0	0	0	0	0	0	0	0	0	0	0	0	0	0	0	0
OTU000546	2	0	0	0	0	0	0	0	0	0	0	0	0	0	0	2	0	0	0	0	0	0	0	0	0	0	0	0	0	0	0	0	0	0	0	0	0	0	0	0	0	0	0	0	0	0.002081	0	0	0
OTU000547	2	0	0	0	0	0	0	0	0	0	0	0	0	0	0	0	0	0	0	0	0	0	2	0	0	0	0	0	0	0	0	0	0	0	0	0	0	0	0	0	0	0	0	0	0	0	0	0	0
OTU000548	2	0	0	0	0	0	0	0	0	0	0	0	0	0	0	0	2	0	0	0	0	0	0	0	0	0	0	0	0	0	0	0	0	0	0	0	0	0	0	0	0	0	0	0	0	0	0.002456	0	0
OTU000549	2	0	0	0	0	0	0	0	0	0	0	0	0	0	0	0	0	0	0	0	0	0	2	0	0	0	0	0	0	0	0	0	0	0	0	0	0	0	0	0	0	0	0	0	0	0	0	0	0
[truncated: 19 more columns]
