# Supplementary material for: Protein feeding mediates sex pheromone biosynthesis in an insect
Source: eLife. 2023 Jan 19;12:e83469. doi: 10.7554/eLife.83469 (PMC9908074; doi:10.7554/eLife.83469)
Supplement: Supplementary file 2. [file elife-83469-supp2.xlsx]

## Sheet: summary.alpha_diversity
	sobs	shannon	simpson	chao	ace	goods_coverage	pielou	pd
Glucose 1	120	2.89329	0.80681	137.885	149.983	0.999618	0.418899	25.8819
Glucose 2	138	2.55177	0.752057	160.286	183.097	0.999579	0.358974	29.2135
Glucose 3	147	2.42137	0.698258	167.182	181.955	0.999637	0.336316	31.5249
Glucose 4	140	2.66119	0.766666	168.957	175.531	0.999621	0.373276	32.3099
Glucose 5	155	2.77714	0.792363	177.455	184.665	0.999634	0.381678	30.188
Glucose + YH 1	144	2.93282	0.791581	195.231	178.819	0.99953	0.409045	26.3847
Glucose + YH 2	126	2.85117	0.79287	146.778	151.188	0.999632	0.408636	21.2815
Glucose + YH 3	138	2.8389	0.784454	160.5	168.746	0.99965	0.399366	20.7212
Glucose + YH 4	112	3.04737	0.834022	135.625	132.644	0.999718	0.447658	17.1914
Glucose + YH 5	127	2.77575	0.763258	162.037	178.612	0.999516	0.397178	20.1887
Fructose 1	121	2.88614	0.806011	143.44	154.609	0.999647	0.41714	18.8954
Fructose 2	110	2.47514	0.75576	155	152.47	0.999562	0.364992	18.1643
Fructose 3	132	2.44496	0.737023	156.667	165.874	0.999631	0.347079	26.9775
Fructose 4	125	2.34235	0.744222	156.714	164.18	0.999621	0.336265	21.0093
Fructose 5	111	2.25456	0.700539	138.556	138.549	0.999667	0.331826	25.6508
Fructose + YH 1	112	3.26083	0.861127	143.071	145.249	0.999632	0.479016	18.1124
Fructose + YH 2	117	2.56398	0.73286	139.957	152.63	0.999531	0.373195	19.4192
Fructose + YH 3	111	2.53481	0.741605	148.059	154.407	0.999526	0.373073	18.8235
Fructose + YH 4	133	2.92715	0.822951	149.034	159.173	0.999661	0.414887	26.71
Fructose + YH 5	167	2.44113	0.696335	191.118	203.063	0.999571	0.33061	24.8722
Sucrose 1	122	2.9876	0.813005	150.05	153.754	0.999448	0.431065	26.4519
Sucrose 2	146	3.07598	0.84278	168.44	172.93	0.99962	0.427824	28.6785
Sucrose 3	130	2.95531	0.81085	183.118	171.421	0.999554	0.420843	27.7568
Sucrose 4	137	3.05706	0.830529	162.87	164.301	0.99963	0.430692	35.5271
Sucrose 5	169	3.15095	0.852077	195.64	195.299	0.999648	0.425753	24.0223
Sucrose + YH 1	128	2.57579	0.770795	161.158	161.058	0.999611	0.367971	27.182
Sucrose + YH 2	148	2.95697	0.815346	165.182	168.72	0.999724	0.410152	22.032
Sucrose + YH 3	149	2.56908	0.760588	174.5	175.746	0.999656	0.355869	20.7208
Sucrose + YH 4	118	2.66446	0.784097	122.857	128.619	0.9998	0.387127	27.9006
Sucrose + YH 5	109	2.95117	0.777534	127	133.832	0.99963	0.436035	16.9505
