# Supplementary material for: Protein feeding mediates sex pheromone biosynthesis in an insect
Source: eLife. 2023 Jan 19;12:e83469. doi: 10.7554/eLife.83469 (PMC9908074; doi:10.7554/eLife.83469)
Supplement: Supplementary file 3. [file elife-83469-supp3.xlsx]

## Sheet: all.genes.expression.annot
id	Frucose-1_fpkm	Frucose-2_fpkm	Frucose-3_fpkm	Frucose-4_fpkm	Frucose-5_fpkm	Frucose-YH-1_fpkm	Frucose-YH-2_fpkm	Frucose-YH-3_fpkm	Frucose-YH-4_fpkm	Frucose-YH-5_fpkm	Glucose-1_fpkm	Glucose-2_fpkm	Glucose-3_fpkm	Glucose-4_fpkm	Glucose-5_fpkm	Glucose-YH-1_fpkm	Glucose-YH-2_fpkm	Glucose-YH-3_fpkm	Glucose-YH-4_fpkm	Glucose-YH-5_fpkm	Sucrose-1_fpkm	Sucrose-2_fpkm	Sucrose-3_fpkm	Sucrose-4_fpkm	Sucrose-5_fpkm	Sucrose-YH-1_fpkm	Sucrose-YH-2_fpkm	Sucrose-YH-3_fpkm	Sucrose-YH-4_fpkm	Sucrose-YH-5_fpkm	Frucose-1_fpkm	Frucose-2_fpkm	Frucose-3_fpkm	Frucose-4_fpkm	Frucose-5_fpkm	Frucose-YH-1_fpkm	Frucose-YH-2_fpkm	Frucose-YH-3_fpkm	Frucose-YH-4_fpkm	Frucose-YH-5_fpkm	Glucose-1_fpkm	Glucose-2_fpkm	Glucose-3_fpkm	Glucose-4_fpkm	Glucose-5_fpkm	Glucose-YH-1_fpkm	Glucose-YH-2_fpkm	Glucose-YH-3_fpkm	Glucose-YH-4_fpkm
41	55.56	53.86	48.56	48.45	52.72	43.06	45.17	51.77	52.91	47.93	47.78	53.23	48.88	54.26	47.47	49.62	51.48	51.89	56.11	58.05	50.9	57.64	54.02	58.37	50.59	52.19	57.83	40.97	40.53	55.29	3887	4910	3713	2046	3966	4723	4750	5165	5004	4600	4586	5097	3697	4290	4159	5095	5798	4558	5117
ATP6	13850.8	14083.6	14080.4	14800.2	13444.5	13681.8	15714.8	14005.8	14976.4	13363.1	11534.6	11925.4	11113.9	13219	11336	14374.2	14866.4	14193.5	13327.7	13780.5	13940.2	12512.9	12768.1	12006.2	11732.7	14896	14414.4	15441.4	15364.4	15314.1	104145	138003	115712	67171	108712	161300	177631	150180	152247	137833	118989	122723	90354	112327	106749	158626	179948	134004	130629
ATP8	3.95	3.89	2.06	7.47	7.86	7.19	6	8.3	4.59	4.11	3.7	2.47	1.56	7.98	3.15	6.53	5.25	0.45	8.22	6.96	2.01	1.41	5.71	6.05	1.89	3.47	3.34	1.78	2.88	0.32	7	9	4	8	15	20	16	21	11	10	9	6	3	16	7	17	15	1	19
Adf1	14.66	10.55	13.2	10.75	13.92	11.01	13.05	12.69	11.29	9.91	10.96	12.22	13.21	12.77	15.61	10.09	9.44	11.86	10.13	11.42	11.8	14.03	13.31	12.28	12.71	10.53	10.08	10.95	9.98	10.15	192	180	189	85	196	226	257	237	200	178	197	219	187	189	256	194	199	195	173
Adf1_1	3.15	2.41	2.09	1.28	2.37	0.88	1.19	1.45	1.5	0.89	2.51	2.27	1.76	2.2	2.63	1.86	1.78	1.62	1.11	2.43	1.48	2.04	1.25	2.56	1.18	2.28	1.54	1.66	1.35	2.06	70.45	70.42	51.24	17.31	56.96	30.72	40.11	46.39	45.42	27.34	77.16	69.45	42.53	55.73	73.63	61.16	64.03	45.66	32.42
Akt1	38.88	31.98	30.14	31.74	34.48	22.14	20	23.01	21.3	24.05	29.98	34.88	32.7	35.14	33.54	27.06	28.8	27.16	32.91	30.86	25.96	38.84	31.75	42.54	47.36	27.47	27.22	19.43	16.96	27.49	1282	1525	1117	694	1248	1172	1101	1158	1071	1150	1369	1663	1229	1353	1455	1344	1723	1320	1501
Bab2	0.67	1.06	0.62	0.99	1.07	0.76	0.59	1.08	0.72	0.95	0.6	0.79	0.56	0.56	0.46	0.89	0.83	0.57	1.22	0.72	1.15	0.52	0.65	0.69	0.92	0.77	0.79	0.87	0.79	0.77	24	49	24	21	41	42	32	54	35	46	30	38	22	23	21	47	48	26	57
C149b	4.28	4.02	4.36	3.11	4.79	2.42	3.55	3.37	2.94	4.08	5.32	4.4	5.82	3.4	3.91	3.78	2.74	4.35	3.99	4.06	2.91	3.33	4.47	4.1	7.02	6.26	3.7	2.34	3.29	2.92	98	120	109	43	118	87	122	110	91	128	167	138	144	88	112	127	101	125	119
COX1	26346.7	28801.1	25812.1	30146.9	24671.9	26918	32489.3	27292.6	29955.5	26459.6	24748.5	23281.5	22858.9	27154.1	22369.4	28451.5	30021.8	27666.3	27628	27072.2	29259.2	24052.7	24588.7	23436.7	22400.6	30040.1	26965.8	30504.1	29823.6	29995.7	450286	641481	482155	310996	453454	721325	834737	665192	692178	620336	580298	544582	422413	524471	478802	713666	825991	593716	615507
COX2	15218	15306.9	14945.1	17610.9	14673.9	14988.3	16823.6	14725.9	15663.9	15154.7	13552.7	12960	12677	15056.6	13401.3	16049.9	16555.5	16412	15007.7	15175.2	15855.5	14612.5	14024.2	14192.1	13046.5	15969.8	15044.9	17658.8	17663.6	16259.8	116632	152883	125187	81469	120941	180111	193833	160947	162307	159327	142503	135942	105050	130410	128631	180534	204258	157938	149933
COX3	26299.8	27115.4	26046.5	29432.3	24837.7	27106.8	30484.3	26849.6	28520.9	27331.3	24257.4	22561.2	22177	26347.8	22064.5	28214.2	29081.3	27123	26563.1	26313.1	26580.7	25070.9	24121.2	23503.6	22029.2	28093.9	25937.8	31275.7	31148.3	28911.7	230610	309852	249618	155776	234210	372676	401837	335741	338118	328751	291816	270756	210256	261092	242303	363096	410503	298627	303617
CYTB	14173.6	15084.5	13456.1	15384.8	13485.4	14784.1	17931	15376.6	16648.9	15492	13034.7	12627.8	12021.4	14246.5	11542.9	16030.5	17231.5	16317.3	16190.1	16065	13797.8	12607.1	12665.3	12142.2	11590.2	16890	15790.7	16944.5	17301.6	17311.9	178991	248252	185725	117271	183139	292733	340409	276917	284259	268372	225834	218256	164143	203321	182559	297115	350307	258739	266515
Cc115	41.58	37.97	32.36	32.63	34.84	41.76	34.72	37.33	38.12	31.39	28.12	39.54	33.8	34.16	33.78	36.49	42.4	33.93	37.76	36.52	38.36	36.04	33.4	32.78	27.87	38.69	30.83	45.35	42.88	34.7	384.7	467.42	355.88	186.11	361.18	606.71	508.37	513.57	522.57	429.32	378.42	490.44	329.53	360.34	416.79	526.31	637.81	430.74	464.85
Cc28b	34.7	35.08	31.28	32.52	31.65	33.06	31.58	30.82	32.87	31.43	31.79	32.87	30.34	31.21	32.83	28.23	33.18	34.4	31.31	32.35	28.29	33.43	32.4	31.73	28.85	30.22	33.55	34.34	29.59	29.21	426	578	431	245	428	644	604	553	555	531	539	549	410	434	505	522	668	544	519
Cg050	15.57	12.41	10.38	15.29	11.96	11.61	11.09	10.74	10.89	9.87	10.37	12.49	12.84	15.35	13.79	13.38	14.04	13.48	10.65	11.31	7.04	12.59	14.47	12.48	13.52	9.72	10.25	10.28	11.93	12.08	184	191	134	109	152	215	197	181	174	160	168	202	164	205	204	232	267	200	164
Comm	91.41	75.2	91.65	88.12	61.45	103.96	107	107.84	99.46	106.46	84.55	83.59	67.75	76.33	64.42	125.87	138.76	86.78	113.97	102.89	64.9	74.21	71.5	76.64	75.43	118.51	91.82	109.95	115.5	106.72	1818	1942	1985	1033	1292	3241	3189	3056	2668	2924	2298	2259	1452	1700	1588	3707	4456	2158	2962
Cs052	15.23	16.36	15.03	16.58	15.58	20.33	19.32	20.6	15.21	18.24	15.54	13.04	14.39	12.9	14.59	15.42	17.03	16.2	16.19	15.41	16.94	11.83	16.27	13.42	11.06	14.83	15.75	18.7	17.32	16.77	140	196	151	92	154	293	267	270	189	230	196	164	143	134	168	208	252	187	194
Csga	20.56	23.84	21.34	21.81	21.54	26.69	27.27	26.25	24.09	24.41	22.09	22.25	18.72	22.26	20.88	25.34	20.19	25.3	21.07	20.77	23.09	23.57	20.75	19.6	19.51	20.66	22.77	24.27	28.13	26.21	253	381	287	162	285	515	497	457	398	412	373	372	249	308	320	456	400	387	338
Dcp1b	27.72	22.91	20.5	23.01	24.25	19.62	20.8	17.73	19.41	20.25	24.27	25.69	25.74	22.93	24.97	22.5	17.22	18.34	23.08	23.29	20.47	28.72	22.41	24.97	28.12	20.74	20.69	17.31	20.41	17.18	491	529	397	246	462	545	554	448	465	492	590	623	493	459	554	585	491	408	533
Dlgp2	28.16	24.12	23.71	18.9	23.12	18.89	18.61	20.25	20.77	19.39	33.91	27.11	35.25	20.95	24.08	32.52	22.55	22.35	26.53	21.89	21.38	30.04	23.59	30.56	36.53	34.71	23.11	18.52	18.88	22.14	883	990	813	363	781	930	875	908	883	832	1472	1158	1200	741	936	1505	1143	869	1081
E4f1	3.97	4.26	3.51	3.12	3.73	2.45	3	3.21	3.27	2.93	4.26	4.73	5.74	3.84	4	3.9	3.18	2.93	3.94	3.14	3.59	3.56	4.51	4.12	4.93	3.57	2.72	2.69	2.57	2.78	203	285	195	99	207	196	237	229	225	207	300	331	322	220	259	299	265	180	259
Frpd4	15.73	14.98	13.72	13.58	15.64	12.58	9.63	12.66	14.13	14.37	15.4	14.7	14.36	13.35	12.92	16.36	16.66	14.22	17.34	16.89	14.66	18.27	16.05	17.33	15.96	15.24	15.64	12.06	10.89	15.12	1101	1417	1081	552	1195	1391	1154	1282	1322	1369	1437	1476	1086	1009	1165	1682	1825	1287	1556
Irs1	4.39	2.48	2.11	2.68	3.65	1.77	3.07	1.62	2.9	2.69	6.06	2.87	3.42	2.04	2.58	3.46	6.6	3.5	2.84	3.52	3.57	3.75	3.12	5.16	2.84	2.67	4.11	1.46	2.19	2.79	19	14	10	7	17	12	20	10	17	16	36	17	16	10	14	22	46	19	16
Irs1_2	7.56	6.32	5.29	8.48	5.17	2.84	3.99	3.43	5.1	3.73	8.92	9.59	5.76	5.71	5.86	5.76	6.77	6.38	6.83	4.52	6.88	10.85	5.75	8.15	8.69	6.17	3.77	3.51	5.36	7.42	34	37	26	23	25	20	27	22	31	23	55	59	28	29	33	38	49	36	40
Irs1_3	29.79	32.07	26.05	24.68	30.73	19.94	18.5	19.79	24.14	21.28	28.76	30.43	30.52	26.5	29.64	25.77	24.83	23.97	27.46	23.41	24.66	33.75	30.83	36.58	33.9	24.6	22.64	18.16	21.72	22.99	586	822	560	293	650	615	547	555	642	574	776	819	649	589	730	744	786	592	704
K1161	113.27	103.94	102.86	89.87	95.4	83.27	87.57	93.09	88.24	96.95	102.41	94.6	90.19	97.73	91.99	82.92	84.76	87.7	85.35	81.58	94.35	90.72	93.12	100.91	90.63	73.39	87.24	84.5	80.12	94.27	4285	5124	4253	2052	3881	4939	4980	5022	4513	5031	5315	4898	3689	4178	4358	4604	5162	4166	4209
L12r1	2.15	2.75	2.39	2.8	3.15	2.81	2.46	2.77	1.86	2.77	2.43	2.21	2.51	2.31	2.58	2.03	2.33	2.74	2.01	2.16	1.89	3.78	2.25	2.57	2.29	2.65	2.95	2.63	3.22	2.18	42	70	51	33	66	86	72	77	49	74	65	59	53	51	63	58	73	67	51
LOC105221763	29.64	33.38	26.4	30.17	31.42	39.13	40.24	41.47	40.15	40.14	27.96	30.22	32.37	29.45	29.26	39.61	33.01	35.1	34.9	43.16	31.93	29.47	33.42	27.77	31.91	33.45	41.12	40.03	39.07	37.84	415	609	404	255	473	859	847	828	760	771	537	579	490	466	513	814	744	617	637
LOC105221765	1.31	0.92	0.75	1.15	0.9	1.17	1.17	1.11	0.89	0.9	9.08	0.69	9.11	0.89	0.99	11.17	0.7	0.76	3.85	1.16	0.58	1.1	0.86	1.33	7.86	14.02	0.84	1.09	1.17	1.04	75	68	47	40	54	104	101	91	69	71	697	54	552	58	69	917	65	54	284
LOC105221766	64.13	56.71	102.9	75.53	82.05	65.45	66.57	54.97	59.02	59.15	55.43	59.92	79.62	47.98	85.31	44.11	71.24	83.49	62.91	55.38	64.31	57.84	88.1	68.33	82.69	45.38	44.27	50.98	44.49	54.84	958	1104	1680	681	1318	1533	1495	1171	1192	1212	1136	1225	1286	810	1596	967	1713	1566	1225
LOC105221767	22.71	17.68	19.34	19.53	20.38	19.54	17.4	17.09	18.33	17.28	20.43	20.54	18.66	19.21	21.85	18.22	17.43	14.62	16.44	17.49	20.04	18.01	19.1	19.56	19.29	15.1	15.19	15.35	17.16	14.28	547	555	509	284	528	738	630	587	597	571	675	677	486	523	659	644	676	442	516
LOC105221768	35.77	34.27	37.06	38.57	34.59	50.01	45.95	48.49	51.91	46.4	34.25	32.81	34.35	31.3	32.8	49.51	49.65	48.05	41.24	48.9	33.21	34.25	37.25	34.23	30.68	43.77	45.15	53.81	52.71	50.17	639	798	726	417	667	1402	1237	1229	1253	1137	836	803	664	633	738	1305	1430	1079	961
LOC105221769	6.57	8.12	8.78	9.69	6.97	9.72	9.22	10.55	6.85	10.11	6.18	6.05	6.69	6.63	7.87	8.42	10.86	10.42	9.07	9.5	5.31	5.75	8.06	6.28	7.85	8.76	7.9	9.01	8.3	7.22	100	161	146	89	114	232	211	229	141	211	129	126	110	114	150	188	266	199	180
LOC105221770	31.81	28.63	33.83	25.29	30.24	20.71	25.86	22.47	24.58	25.3	26.02	32.56	31.04	30.16	28.65	28.2	32.42	32.24	38.69	34.33	18.94	35.14	29.91	42.33	36.74	29.83	23.84	17.83	22.64	28.14	671	787	780	322	686	685	820	676	701	732	753	940	708	719	757	873	1101	854	1064
LOC105221771	0.45	0.51	0.31	0.25	0.43	0.78	0.91	0.71	0.7	0.55	2.35	0.47	2.27	0.32	0.73	2.89	0.72	1.11	1.65	0.79	0.58	0.71	0.76	0.27	2.98	2.79	0.76	0.62	0.93	0.97	13	20	9	4	14	36	39	29	26	21	94	18	70	11	26	116	34	40	60
LOC105221772	12.07	12.41	13.27	12.9	12.73	12.8	11.55	13.59	13.78	13.71	12.63	12.38	13.13	11.8	12.31	12.61	13.16	12.93	12.83	13.52	12	14.09	13.7	12.07	11.92	11.62	12.45	13.01	12.17	12.62	544	729	654	351	617	905	783	874	840	848	781	764	640	601	695	834	955	732	754
LOC105221773	1.41	1.12	1.31	1.58	1.58	0.78	0.76	1.03	0.92	0.77	1.89	1.23	1.71	1.13	1.19	2	1.29	1.1	1.5	1.18	1.19	1.17	1.42	1.75	2.22	2.62	0.93	0.86	0.82	1.1	125	130	127	85	151	109	102	131	110	94	230	150	164	114	133	261	185	123	174
LOC105221774	0.06	0	0.29	0	0	0.06	0.11	0.02	0.26	0.02	0.07	0.19	0.03	0	0.08	0.04	2	0.13	0.51	0	0	0	0	0	0	0.22	0.05	0.03	0.14	0.26	2	0	10	0	0	3	5	1	11	1	3	8	1	0	3	2	101	5	21
LOC105221775	44.82	32.36	37.78	42.36	40.58	44.05	41.15	35.34	41.85	34.17	36.1	36.93	36.42	30.56	44.12	32.34	34.23	31.6	27.96	35.33	35.64	39.5	39.01	40.19	43.49	31.7	32.97	35.56	37.99	29.67	305	287	281	174	297	470	421	343	385	319	337	344	268	235	376	323	375	270	248
LOC105221777	4.44	2.76	3.03	2.69	3.74	3.46	2.63	2.08	2.71	2.11	2.67	2.68	3.58	2.68	2.14	1.82	2.63	2.64	1.62	2.51	2.6	3.26	3.96	3.34	3.31	2.44	3.16	1.56	2.78	1.86	63	51	47	23	57	77	56	42	52	41	52	52	55	43	38	38	60	47	30
LOC105221778	0	0	0	0.18	0.1	0	0	0	0	0	0	0	0	0	0	0	0	0.09	0.08	0	0.13	0	0	0	0.12	0	0	0	0	0	0	0	0	1	1	0	0	0	0	0	0	0	0	0	0	0	0	1	1
LOC105221779	0	0	0	0	0	0	0	0	0	0	0	0	0	0	0	0	0	0	0	0	0	0	0	0	0	0	0	0	0	0	0	0	0	0	0	0	0	0	0	0	0	0	0	0	0	0	0	0	0
LOC105221780	0.07	0	0	0	0	0	0	0	0	0	0	0	0	0	0	0	0	0	0.05	0	0	0	0	0	0	0	0	0	0	0	1	0	0	0	0	0	0	0	0	0	0	0	0	0	0	0	0	0	1
LOC105221781	0	0	0	0	0	0	0	0.08	0	0	0	0	0	0	0	0	0	0	0	0	0	0	0	0	0	0	0	0	0	0	0	0	0	0	0	0	0	1	0	0	0	0	0	0	0	0	0	0	0
LOC105221782	57.59	64.83	65.92	76.21	57.01	65.64	68.4	77.33	64.55	70.4	59.6	60.61	57.33	54.62	61.45	64.53	73.12	77.11	62.47	67.38	62.94	52.97	62.21	57.97	57.04	63.25	65.94	79.2	69.42	70.88	681	999	852	544	725	1217	1216	1304	1032	1142	967	981	733	730	910	1120	1392	1145	963
LOC105221783	0	0.07	0	0	0.04	0.21	0.06	0.2	0.04	0.03	3.42	0.03	2.34	0.17	0.08	3.27	0.06	0.19	0.92	0.1	0.11	0.12	0.11	0.13	2.92	4.02	0.2	0.11	0	0.11	0	2	0	0	1	7	2	6	1	1	105	1	58	4	2	110	2	5	25
LOC105221784	165.92	180.77	168.43	169.36	196.01	188.67	197.8	175.84	182.49	170.82	164.5	205.82	182.07	164.84	200.22	168.63	148.61	160.61	153.08	183.25	165.62	192.43	190.74	182.48	187.76	160.97	190.09	175.79	199.85	148.46	1727	2452	1916	1064	2194	3079	3095	2610	2568	2439	2349	2932	2049	1939	2610	2576	2490	2099	2077
LOC105221785	0.73	0.56	0.67	0	0.3	0.36	0.27	0.29	0.54	0.24	0.95	0.48	0.68	0.29	0.78	0.28	0.3	0.32	0.25	0.24	0.1	0.41	0.37	0.29	0.18	0.25	0.55	0.64	1.25	0.33	9	9	9	0	4	7	5	5	9	4	16	8	9	4	12	5	6	5	4
LOC105221786	0.24	0.31	0.95	0.2	0.63	0.43	0.4	0.5	0.44	0.29	0.61	0.79	3.99	0.25	3.1	0.22	0.65	0.51	0.52	0.81	0.52	1.1	0.67	0.79	0.8	0.28	0.34	0.41	0.64	0.37	6	10	26	3	17	17	15	18	15	10	21	27	108	7	97	8	26	16	17
LOC105221787	3.22	3.58	3.8	3.27	4.2	2.59	3.15	3.08	2.78	2.79	3.67	3.75	4.43	3.11	5.5	2.42	2.07	2.44	2.54	2.31	3.53	3.75	4.61	3.52	3.79	2.48	2.44	2.77	2.88	1.61	106	154	137	65	149	134	156	145	124	126	166	169	158	116	227	117	110	101	109
LOC105221788	0	0	0	0	0	0	0	0	0	0	0	0	0	0	0	0	0	0	0	0	0	0	0	0	0	0	0	0.09	0.08	0	0	0	0	0	0	0	0	0	0	0	0	0	0	0	0	0	0	0	0
LOC105221789	7.81	8.58	8.87	9.04	6.97	6.83	6.16	8.92	7.5	7.96	7.94	6.62	7.47	8.81	7.19	4.49	5.14	4.35	4.32	3.18	8.04	9.55	10.52	8.28	7.69	4.85	4.62	6.84	4.69	6.51	269	385	334	188	258	369	319	438	349	376	375	312	278	343	310	227	285	188	194
LOC105221790	1.56	1.52	0.85	1.6	1.33	1.05	0.88	1.05	1.45	1.2	1.06	0.93	1.08	1.36	0.77	1.24	1.38	1.35	1.35	1.52	0.58	1.24	1.21	1.08	1.2	1.22	1.47	0.97	0.92	1.15	71	90	42	44	65	75	60	68	89	75	66	58	53	70	44	83	101	77	80
LOC105221791	19.9	14.72	14.75	15.4	18.37	16.22	14.4	13.65	13.97	11.86	15.57	17.09	15.72	12.08	18.33	16.63	12.91	17.24	14.82	18.26	12.78	18.71	18.47	16.88	21.25	11.75	15.01	13.86	14.96	12.79	137	132	111	64	136	175	149	134	130	112	147	161	117	94	158	168	143	149	133
LOC105221792	0.61	0.49	0.52	0.28	0.63	0.36	0.2	0.33	0.32	0.2	1.23	0.27	1.46	0.54	0.3	1.38	0.19	0.43	0.49	0.32	0.36	0.76	0.61	0.36	1.65	2.07	0.46	0.29	0.15	0.29	18	19	17	5	20	17	9	14	13	8	50	11	47	18	11	60	9	16	19
LOC105221793	38.94	43.74	50	46.18	45.07	37.52	33.99	34.67	29.75	33.97	39.26	33.8	50.28	34.76	53.11	28.18	32.16	32.19	32	29.64	33.93	36.25	47	33.64	53.82	31.65	34.38	30.61	24.66	27.38	733	1087	1030	524	904	1110	972	927	776	870	1016	891	1016	732	1237	773	1004	773	803
LOC105221795	2.73	2.75	2.97	3.4	1.99	3.71	4.04	3.12	2.97	3.24	3.86	3.25	4.58	2.87	2.93	3.49	2.6	3.33	2.75	2.92	1.42	2.67	1.92	2.44	2.77	3.62	2.24	2.69	3.93	3.64	32	42	38	24	25	68	71	52	47	52	62	52	58	38	43	60	49	49	42
LOC105221796	0	0	0	0	0	0	0	0	0	0	0	0	0	0	0	0	0	0	0	0	0	0	0	0	0	0	0	0	0	0	0	0	0	0	0	0	0	0	0	0	0	0	0	0	0	0	0	0	0
LOC105221797	0.09	0.07	0.08	0	0.16	0.13	0.11	0.1	0.25	0.15	0.17	0.1	0.05	0.15	0.07	0.21	0.14	0.05	0.13	0.12	0	0.21	0.03	0	0.16	0.31	0.87	0.23	0.13	0.2	3	3	3	0	6	7	6	5	12	7	8	5	2	6	3	11	8	2	6
LOC105221798	0.08	0.25	0	0	0	0.05	0.05	0.12	0.06	0.06	7.63	0	5.79	0	0	9.43	0	0	2.15	0.06	0.2	0.1	0.09	0.07	8.37	13.58	0	0.06	0	0.05	1	4	0	0	0	1	1	2	1	1	127	0	76	0	0	168	0	0	34
LOC105221799	30.71	27.64	27.94	31.75	28.12	29.89	30.98	28.09	31.04	33.37	29.53	34.37	31.07	30.18	28.57	33.94	34.03	33.37	30.51	31.48	23.88	31.68	31.94	27.65	25.59	29.97	34.35	32.63	35.66	35.07	532	624	529	332	524	812	807	694	727	793	702	815	582	591	620	863	949	726	689
LOC105221800	0	0	0	0	0	0	0	0	0	0	0.22	0.11	0.25	0	0	0.52	0	0	0.21	0	0	0	0	0	0.43	0.79	0	0	0	0	0	0	0	0	0	0	0	0	0	0	8	4	7	0	0	20	0	0	7
LOC105221802	13.24	15.21	13.53	17.48	15.87	18.43	13.14	12.86	14.86	14.7	14.64	14.53	14.79	17.6	15.08	15.75	12.98	14.66	14.07	15.57	14.94	16.21	12.47	12.97	15.23	14.03	12.46	15.26	15.66	16.31	197	295	220	157	254	430	294	273	299	300	299	296	238	296	281	344	311	274	273
LOC105221803	75.12	85.14	70.58	74.69	79.4	116.54	133.86	156.47	150.73	144.41	62.16	66.66	64.66	79.37	77.52	123.09	131.08	147.27	132.31	150.02	62.32	81.69	69.37	68.05	63.59	133.27	155.47	145.06	166.39	159.2	1413	2087	1451	848	1606	3437	3785	4197	3833	3726	1604	1716	1315	1687	1826	3398	3969	3478	3244
LOC105221804	1546.83	1423.83	1580.97	1647.84	1636.76	1314.17	1181.53	1247.82	1196.6	1239.95	1541.83	1527.93	1574.46	1558.66	1703.51	1006.99	1032.28	1081.44	975.54	1051.65	1563.04	1609.78	1630.08	1472.46	1470.69	1015.15	1032.87	1256.96	1274.42	1088.05	11855	14221	13243	7623	13490	15792	13613	13638	12399	13036	16212	16027	13047	13500	16351	11327	12736	10407	9746
LOC105221805	0.79	1.03	1.11	0.59	1.36	0.7	0.6	0.94	0.54	0.81	0.96	0.82	0.96	0.63	1.23	0.75	0.84	0.51	0.57	0.5	0.66	0.4	0.79	1.09	1.22	1.01	1.11	0.72	0.51	0.43	22.32	37.16	32.13	10.14	41.19	28	28.69	35.08	23.35	30.14	35.05	34.32	31.31	20.11	41.26	29.03	38.43	18.09	19
LOC105221806	19.53	14.94	19.19	15.31	17.28	19.58	20.11	18.11	18.19	15.63	16.62	18.27	15.65	18.68	17.88	14.89	15.22	15.86	14.32	15.08	16.4	16.31	18.81	16.44	16.78	15.62	14.55	15.86	18.1	13.96	574.68	572.84	616.87	271.86	546.81	903	889.31	759.92	723.65	630.86	670.95	735.68	497.69	620.89	658.74	642.97	720.57	585.91	549
LOC105221807	6.21	5.44	6.88	6.37	5.77	6.75	6.11	8.83	7.05	8.8	4.72	4.22	5.18	6.96	5.1	4.95	8.53	6.83	6.91	5.65	5.2	4.92	6.39	4.38	5.96	6.27	5.4	6.41	7.09	7.14	71	81	86	44	71	121	105	144	109	138	74	66	64	90	73	83	157	98	103
LOC105221808	12.6	14.6	15.32	13.17	12.03	10.63	9.45	10.5	7.44	9.93	15.72	12.98	17.36	12.87	12.9	12.96	10.3	8.49	9.73	9.52	15.58	14.06	15.88	13.91	22.57	15.37	8.16	10.6	9.82	9.05	149	225	198	94	153	197	168	177	119	161	255	210	222	172	191	225	196	126	150
LOC105221809	16.97	16.94	14.08	14.85	16.88	13.08	9.99	15.69	15.51	14.42	23.9	16.83	29.65	15.16	15.7	30.83	20.07	21.31	29.6	21.22	13.49	21.47	16.58	25.13	33.59	35.63	19.31	12.93	12.78	19.77	927	1202	833	486	987	1113	812	1216	1144	1089	1767	1252	1733	938	1068	2442	1768	1463	2098
LOC105221810	9.63	8.28	9.7	9.43	9.46	7.61	7.34	7.32	8.73	7.07	8.69	11.76	9.8	10.04	9.49	7.91	7.53	8.38	8.4	8.83	8.43	12.23	7.54	10.97	9.23	8.32	7.69	7.31	6.92	8.7	247	277	272	146	261	306	283	268	303	249	306	413	272	291	305	298	311	270	281
LOC105221811	0	0	0.05	0.2	0.06	0	0.08	0	0	0	0	0	0.06	0.16	0	0	0	0	0.05	0	0	0	0.07	0.21	0	0	0	0	0	0	0	0	1	2	1	0	2	0	0	0	0	0	1	3	0	0	0	0	1
LOC105221812	31.47	22.76	25.11	23.94	25.03	19.16	19.1	20.26	19.71	20.23	28.03	25.7	26.92	23.54	19.91	24.68	24.51	23.73	23.65	23.89	22.71	26.91	23.9	30.79	27.3	24.84	21.16	19.74	18.55	22.58	1571	1481	1377	722	1343	1502	1433	1447	1330	1389	1926	1767	1463	1329	1247	1809	1966	1488	1539
LOC105221813	8.97	8.47	8.99	8.44	9.56	8.97	10.26	8.98	11.15	9.11	10.33	9.21	9.42	8.61	7.69	10.96	9.49	10.28	11.64	8.53	7.25	9.27	9.64	10.18	12.44	12.66	9.05	8.62	10.05	9.05	178	219	195	101	204	279	306	254	299	248	281	250	202	193	191	319	303	256	301
LOC105221814	9.78	10.16	10.28	8.58	8.7	7.95	7.3	8.38	8.57	8.59	9.98	10.03	9.25	8.56	10.31	8.01	8.22	7.45	8.22	7.74	9.62	9.19	8.88	8.07	9.04	8.53	8.55	6.61	7.38	8.29	302	409	347	160	289	385	339	369	358	364	423	424	309	299	399	363	409	289	331
LOC105221815	1515.7	1494.8	1643.58	1638.21	1643.59	1258.04	1155.11	1221.33	1184.27	1201.95	1616.19	1595.68	1641.77	1602.05	1748.2	945.54	984.9	1027.5	958.97	1036.73	1608.83	1615.36	1701.87	1491.61	1504.97	973.77	1034.76	1166.07	1224.9	1012.9	19496	25057	23106	12719	22735	25372	22336	22403	20595	21208	28521	28091	22833	23288	28162	17850	20394	16595	16079
LOC105221816	8.22	7.7	8.62	7.44	7.18	8.48	9.32	9.58	9.25	8.98	9.2	8.52	8.46	8.1	7.7	7.75	7.38	7.81	8.07	9.16	6.8	7.61	8.56	6.34	7.88	9.39	7.36	6.39	7.75	7	263	318	300	140	245	419	447	429	398	387	396	370	291	287	307	356	371	310	328
LOC105221817	0	0	0	0	0	0	0	0	0	0	0	0	0	0	0.14	0	0	0	0	0	0	0	0.2	0	0	0	0	0	0	0	0	0	0	0	0	0	0	0	0	0	0	0	0	0	1	0	0	0	0
LOC105221818	22.77	19.57	17.52	18.02	19.72	13.99	16.43	19.03	18.15	17.7	17.94	22.03	19.59	20.27	20.46	20.31	21.77	21.96	26.55	24.02	13.85	22.41	19.15	27.25	25.44	21.29	20.44	13.95	13.77	20.34	1093	1221	927	520	1030	1055	1181	1310	1177	1164	1182	1451	1021	1108	1228	1434	1692	1324	1662
LOC105221819	18.8	15.45	15.24	11.65	14.73	13.36	14.43	13.91	12.76	14.25	14.89	16.82	14.58	15.52	17.2	14.47	15.59	15.5	14.82	14.41	13.82	16.47	14.4	15.81	17.28	13.97	12.66	12.43	15.25	12.6	254	272	225	95	214	283	293	268	233	264	276	311	213	237	291	287	339	263	261
LOC105221820	15.25	14.27	13.1	13.45	11.82	12.02	15.96	13.87	13.43	14.24	14.19	14.18	13.47	13.77	13.22	12.88	11.44	12.15	13.03	12.92	13.56	12.32	13.88	13.63	13.08	14.66	11.81	14.51	12.95	12.05	246	300	231	131	205	304	387	319	293	315	314	313	235	251	267	305	297	246	274
LOC105221821	13.57	13.74	15.05	14.37	17.17	14.99	15.6	15.39	14.48	14.53	14.38	15.44	13.76	15.89	16.76	14.23	13.82	13.82	13.39	15.09	11.51	14.63	13.33	12.62	13.58	14.11	14.22	16.3	13.93	15.12	269	355	326	172	366	466	465	435	388	395	391	419	295	356	416	414	441	344	346
LOC105221822	0.13	0.35	0.12	0.14	0.19	0.56	0.56	0.29	0.62	0.35	2.29	0.32	3.76	0.3	0.2	2.61	0.34	0.17	1.25	0.24	0.15	0.21	0.09	0.37	2.76	3.89	0.35	0.41	0.43	0.34	3	11	3	2	5	21	20	10	20	12	76	11	98	8	6	93	13	5	39
LOC105221823	0	0	0	0	0	0	0	0	0	0	2.58	0	1.02	0	0	0.66	0	0	0	0	0	0	0	0	1.5	1.78	0	0	0.09	0	0	0	0	0	0	0	0	0	0	0	29	0	9	0	0	8	0	0	0
LOC105221824	59.73	59.52	53.56	52.33	62.09	66.76	59.95	55.46	57.61	64	55.78	65.85	56.43	58.45	65	63.09	59.11	59.29	61.1	67.66	55.61	63.38	55.31	59.18	64.47	60.73	67.83	58.44	68.86	50.42	747	970	732	395	835	1309	1127	989	974	1098	957	1127	763	826	1018	1158	1190	931	996
LOC105221825	8.88	4.5	6.1	8.67	9.44	9.92	9.5	8.34	8.33	5.67	9.48	7.77	7.34	6.04	11.78	8.11	9.46	9.22	6.21	7.84	9.43	7.54	8.39	7.09	6.02	10.14	9.94	8.38	9.5	6.66	56	37	42	33	64	98	90	75	71	49	82	67	50	43	93	75	96	73	51
LOC105221826	2.55	3.97	7.21	3.84	4.74	9.36	10.23	7.37	7.2	10.42	4.11	5.31	6.36	2.87	4.57	6.63	10.99	8.68	10.14	8.31	4.59	4.93	5.13	4.77	6.47	5.77	6.28	6.76	7.45	7.56	33	67	102	30	66	190	199	136	126	185	73	94	89	42	74	126	229	141	171
LOC105221827	5.95	4.87	4.5	5.24	5.56	2.71	3.07	3.27	3.5	4.02	5.21	5.29	6.35	5.15	4.68	4.89	4.4	4.02	4.91	4.58	3.45	6.37	4.93	6.73	6.65	5.18	4.91	2.42	2.97	4.3	328	344	270	173	335	238	257	260	252	305	396	400	381	321	329	399	397	278	359
LOC105221828	10.85	10.31	11.43	13.69	14.66	17.02	10.03	9.91	12.69	14.72	12.09	19.36	16.86	11.16	14.56	14.87	10.66	9.6	14.28	18.69	11.32	16.72	12.13	14.26	14.09	11.61	23.29	10.39	10.6	8.17	172	213	198	131	250	423	239	224	272	320	263	420	289	200	289	346	272	191	295
LOC105221829	0.64	0.12	0.15	0	0	0.05	0	0	0.12	0	0	0.06	0.15	0	0	0.05	0	0.06	0	0	0.09	0	0.18	0.14	0.09	0.12	0.07	0	0.17	0.14	8	2	2	0	0	1	0	0	2	0	0	1	2	0	0	1	0	1	0
LOC105221830	0.43	0.85	0.06	0.1	0.11	0.16	0.25	0.13	0.09	0.31	0.27	0.18	0.06	0.27	0.05	0.13	0.15	0.2	0.57	0.13	0.44	0	0.21	0.16	0.07	0.24	0.1	0.15	0.13	0	7	18	1	1	2	4	6	3	2	7	6	4	1	5	1	3	4	4	12
LOC105221831	1.72	1.44	2.92	0.92	1.42	2.62	2.5	2.13	2.55	2.85	1.59	2.63	2.91	1.71	1.98	2.04	2.87	2.42	2.65	2.76	1.99	2.6	1.48	1.77	2.1	2.74	3.26	1.44	2.37	2.48	34	37	63	11	30	81	74	60	68	77	43	71	62	38	49	59	91	60	68
LOC105221833	0	0	0.07	0	0	0	0	0.05	0	0	0	0	0	0.07	0	0	0	0	0.24	0	0.09	0	0	0	0.09	0	0	0	0.06	0	0	0	1	0	0	0	0	1	0	0	0	0	0	1	0	0	0	0	4
LOC105221834	0	0	0	0	0	0	0	0	0	0	0	0	0	0	0	0	0	0	0.15	0	0.11	0	0	0	0	0	0	0.15	0.21	0	0	0	0	0	0	0	0	0	0	0	0	0	0	0	0	0	0	0	2
LOC105221835	10.88	11.06	10.92	8.74	11.7	10.57	11.28	12.34	10.73	10.79	12.71	9.22	11.87	11.5	10.17	10.96	11.15	10.92	10.29	10.56	9.91	9.65	10.31	8.74	10.82	10.51	10.11	9.82	11.16	11.11	338	448	371	164	391	515	527	547	451	460	542	392	399	404	396	500	558	426	417
LOC105221836	0	0	0	0	0	0.05	0	0	0	0	0	0.06	0	0	0	0	0	0.1	0	0	0	0	0	0	0	0	0	0	0.03	0.02	0	0	0	0	0	2	0	0	0	0	0	2	0	0	0	0	0	3	0
LOC105221837	11.53	9.79	10.4	8.2	10.31	8.35	8.62	9	9.16	7.78	10.97	10.49	10.21	11.8	8.78	7.47	7.85	8.4	8.53	9.3	9.19	11.55	11.68	10.64	12.01	7.28	7.41	7.77	7.74	7.88	282	312	278	121	271	320	317	314	303	261	368	351	270	326	269	268	309	258	272
LOC105221838	98.81	87.18	109.55	97.72	87.93	117.09	105.2	125.47	114.16	109.64	87.65	78.71	78.87	91.2	75.01	108.03	135.29	103.31	110.17	104.3	73.86	93.19	71.87	93.8	73.96	114.06	96.48	125.99	115.8	117.98	1950	2242	2363	1164	1866	3623	3121	3531	3046	2968	2373	2126	1683	2034	1854	3129	4298	2560	2834
LOC105221839	12.98	14.29	14.46	11.72	15.34	8.99	11.01	10.37	9.44	9.62	16.79	14.85	20.37	12.24	12.49	15.73	8.99	9.83	10.33	9.31	12.46	13.97	15.86	13.36	22.52	15.61	8.38	9.31	9.64	9.37	244	350	297	133	310	265	311	278	240	248	433	382	414	260	294	434	272	232	253
LOC105221840	2.54	1.94	2	2.03	2.01	1.42	1.28	1.32	1.4	1.62	1.81	1.73	2.13	2.26	1.88	1.7	2.2	1.97	2.06	1.74	1.92	2.35	2.1	2.59	2.08	2.05	2.02	1.45	1.54	1.92	162	161	139	78	138	142	123	120	121	142	158	151	147	163	150	159	226	158	171
LOC105221841	0	0	0	0	0	0.07	0	0	0	0	0	0	0	0	0	0	0.07	0	0	0	0	0	0	0	0.12	0.08	0	0	0	0	0	0	0	0	0	1	0	0	0	0	0	0	0	0	0	0	1	0	0
LOC105221842	5.8	7.02	6.3	5.94	6.9	2.31	2.3	3.13	2.31	2.97	5.98	7.02	6.15	6.15	6.83	1.98	2.9	3.11	2.84	3.47	6.58	7.13	6.76	6.53	5.55	3.25	3.55	3.44	2.31	2.9	153	244	189	94	199	100	93	122	84	107	226	258	177	190	235	80	125	108	96
LOC105221843	52.15	46.63	49.68	48.07	54.37	51.03	50.07	44.12	48.98	51.31	49.11	45.76	48.23	55.29	52.88	49.04	51.31	44.27	53.78	50.08	45.77	48.13	49.12	50.07	49.89	44.48	43.78	48.24	50.78	49.09	363	423	378	202	407	557	524	438	461	490	469	436	363	435	461	501	575	387	488
LOC105221844	0	0.1	0	0	0	0	0	0	0	0.05	12.06	0	10.41	0	0	9.02	0	0.11	3.25	0	0	0	0	0	11.46	11.78	0	0	0	0.04	0	2	0	0	0	0	0	0	0	1	250	0	170	0	0	200	0	2	64
LOC105221845	0	0.06	0.08	0	0	0	0	0.06	0	0	8.72	0.06	8.02	0	0	8.66	0	0.33	2.6	0	0	0	0	0	8.39	9.09	0	0	0	0	0	1	1	0	0	0	0	1	0	0	145	1	105	0	0	154	0	5	41
LOC105221846	45.29	48.54	48.27	46.28	48.55	49.78	48.14	46.16	44.83	48.44	44.24	53.73	50.3	47.58	52.44	43.9	40.12	46.48	43.7	45.66	43.29	52.73	46.65	51.19	51.7	44.89	52.57	45.7	50.24	44.72	582	813	678	359	671	1003	930	846	779	854	780	945	699	691	844	828	830	750	732
LOC105221847	0	0	0	0	0	0	0	0	0	0	0	0	0	0	0	0	0	0	0	0	0	0	0	0	0	0	0	0	0	0	0	0	0	0	0	0	0	0	0	0	0	0	0	0	0	0	0	0	0
LOC105221848	0	0	0	0	0	0	0	0	0	0	0	0	0	0	0	0	0	0	0	0	0	0	0	0	0	0	0	0	0	0	0	0	0	0	0	0	0	0	0	0	0	0	0	0	0	0	0	0	0
LOC105221849	0.81	0.48	0.66	0.77	0.96	0.63	0.64	0.82	0.52	0.71	0.75	0.61	0.69	0.58	0.65	0.89	0.52	0.67	0.65	0.48	0.48	0.69	0.18	0.56	0.98	1.01	0.98	0.42	0.36	0.48	26	20	23	15	33	32	31	38	23	31	33	27	24	21	26	42	27	27	27
LOC105221850	31.43	29.31	28.47	27.37	28.16	30.65	32.31	33.95	33.11	32.14	29.55	30.16	29.35	28.64	29.34	30.93	31.01	29.43	30.74	31.72	28.56	31.67	29.25	28.51	32.48	33.96	31.55	30.61	32.58	29.5	603	733	597	317	581	922	932	929	859	846	778	792	609	621	705	871	958	709	769
LOC105221851	61.19	50.37	45.12	49.46	53.7	57.92	55	61.49	64.62	62.27	46.08	40.88	42.5	50.9	53.17	58.73	72.19	68.65	66.37	68.17	42.55	56.08	42.28	49.94	33.69	68.63	63.58	74.85	69.86	70.45	783	840	631	382	739	1162	1058	1122	1118	1093	809	716	588	736	852	1103	1487	1103	1107
LOC105221852	0.34	0	0.31	0	0.1	0	0	0.08	0.17	0	61.25	0.16	46.28	0.2	0.09	88.75	0.07	0.36	22.81	0.08	0	0.28	0.13	0	33.08	91	0	0	0	0.19	3	0	3	0	1	0	0	1	2	0	749	2	446	2	1	1161	1	4	265
LOC105221853	0.74	0.39	1.14	0.41	0.81	0.24	0	0.26	0	0.36	330.38	0.72	361.14	0.44	0.49	324.43	0.86	2.28	101.2	0.54	0.3	0.77	0.71	0.44	333.24	424.49	0.53	0.1	0.36	0.22	6	4	10	2	7	3	0	3	0	4	3649	8	3143	4	5	3831	11	23	1062
LOC105221854	18.12	17.54	16.54	13.92	19.77	13.13	18.57	16.61	17.14	17.59	14.66	17.72	17.31	17.9	15.64	16.25	15.58	15.38	16.92	17.38	17.71	17.82	16.39	18.51	17.3	16.66	18.27	15.35	15.79	15.4	455	574	454	211	534	517	701	595	582	606	505	609	470	508	492	599	630	485	554
LOC105221855	63.95	63.93	61.69	64.69	70.97	65.54	64.94	64.65	64.88	65.97	69.99	73.31	71.91	64.29	69.56	77.69	76.72	77.6	77.84	83.74	62.94	68.29	66.6	75.04	73.46	79.29	78.74	64.93	64.65	69.47	2614	3405	2759	1601	3107	4176	3978	3767	3563	3680	3919	4082	3176	2966	3554	4650	5031	3965	4131
LOC105221856	12.21	9.05	9.42	11.33	10.54	8.77	10.99	7.43	9.12	9.63	15.2	10.05	14.53	8.8	9.41	15.28	9.21	11.71	10.61	10.15	9.13	9.7	9.2	9.68	14.33	13.02	8	7.87	8.39	9.26	318	307	268	178	295	358	430	276	321	344	543	358	409	259	307	584	386	383	360
LOC105221857	0.07	0.05	0.07	0	0	0	0	0	0.05	0	6.42	0.05	8.42	0	0	9.25	0	0.11	3.16	0.05	0.08	0	0	0.06	8.73	9.31	0	0	0	0.08	1	1	1	0	0	0	0	0	1	0	124	1	128	0	0	191	0	2	58
LOC105221858	0	0.08	0	0	0	0	0	0	0	0	3.8	0	4.08	0	0	3.07	0	0	1.54	0	0	0	0	0	6.38	6.8	0	0	0	0	0	1	0	0	0	0	0	0	0	0	52	0	44	0	0	45	0	0	20
LOC105221859	0	0.02	0.1	0	0	0.06	0	0	0.02	0	0.07	0.07	0	0	0	0.02	0.03	0	0	0.02	0.05	0.03	0.03	0.02	0.03	0.09	0	0.02	0.07	0.03	0	1	5	0	0	4	0	0	1	0	4	4	0	0	0	1	2	0	0
LOC105221860	59.3	42.25	64.81	19.46	67.33	36.17	33.85	34.45	28.76	17.5	25.67	192.19	28.96	28.47	33.65	4.98	24.64	15.59	11.01	4.08	22.96	40.93	49.31	15.39	67.7	3.57	3.87	13.89	11.72	6.68	454.5	422	542.87	90	554.95	434.62	390	376.5	297.98	184	269.95	2015.94	240	246.58	323	56	304	150	110
LOC105221861	0	0	0	0	0	0	0	0	0	0	0	0	0	0	0	0	0	0.12	0	0	0	0	0	0	0	0	0	0	0	0	0	0	0	0	0	0	0	0	0	0	0	0	0	0	0	0	0	1	0
LOC105221862	0.29	0.44	1.32	0.24	0.4	0.55	0.67	0.61	0.96	0.21	0.63	0.74	0.4	0.13	0.69	0.98	0.9	0.57	1	0.52	0	0.54	0.32	0.64	0.64	0.33	0.85	1.02	0.32	0.41	2	4	10	1	3	6	7	6	9	2	6	7	3	1	6	10	10	5	9
LOC105221863	0	0	0	0	0	0	0	0	0	0	0	0	0	0	0	0	0	0	0	0	0	0	0	0	0	0	0	0	0	0	0	0	0	0	0	0	0	0	0	0	0	0	0	0	0	0	0	0	0
LOC105221864	23.59	25.24	24.05	52.93	27.2	122.77	209.91	132.99	216.65	167.34	13.26	25.31	23.56	29.46	20.34	213.26	164.87	234.13	186.75	169.24	12.98	10.45	25.47	16.87	21.68	104.67	170.27	126.98	221.42	299.9	175	244	195	237	217	1428	2341	1407	2173	1703	135	257	189	247	189	2322	1969	2181	1806
LOC105221865	8.12	7.65	4.69	11.33	12.72	33.9	39.44	47.57	72.2	67.32	4.15	5.41	4.35	14.5	4.55	48.06	40.54	55.73	48.98	63.66	4.24	3.92	6.41	5.35	3.66	26.02	28.96	36.96	73.07	92.4	57	70	36	48	96	373	416	476	685	648	40	52	33	115	40	495	458	491	448
LOC105221866	3.29	3.21	20.91	83.16	31.67	81.18	2.98	13.83	2.65	1.31	87.22	45.08	137.07	240.73	255.76	2.44	60.04	344.57	87.68	2.21	2.49	39.41	167.37	46.47	98.94	0.92	1.01	4.59	1.75	70.96	22	28	153	336	228	852	30	132	24	12	801	413	992	1821	2144	24	647	2896	765
LOC105221867	44.76	59.83	37.25	63.7	66.31	59.75	31.91	25.71	21.22	30.98	54.58	91.59	73.55	38.03	71.76	36.09	10.94	9.67	24.02	35.71	59.73	98.68	73.11	51.82	72.72	25.95	48.28	23.56	43.39	14.86	376	655	342	323	599	787	403	308	241	357	629	1053	668	361	755	445	148	102	263
LOC105221868	3.78	6.71	5.85	9.3	7.04	4.49	7.9	3.57	7.24	4.28	4.66	5.62	3.86	4.62	5.63	5.25	4.13	8.31	4.7	5.5	7.91	4.89	4.99	3.85	4.81	5.93	5.74	2.88	5.05	5.55	29	67	49	43	58	54	91	39	75	45	49	59	32	40	54	59	51	80	47
LOC105221869	3.27	3.58	2.99	5.41	2.32	6.25	4.97	4.91	6.56	8.74	5.56	1.71	3.74	3.3	8.57	4.03	1.45	3.35	3.34	3.84	1.3	4.09	1.4	3.2	1.91	3.12	3.56	3.44	4.09	1.88	21	30	21	21	16	63	48	45	57	77	49	15	26	24	69	38	15	27	28
LOC105221870	0	0	0	0	0.16	0	0	0	0	0.06	0	0	0	0	0	0.06	0	0	0	0.06	0	0	0	0	0	0.19	0	0	0	0.05	0	0	0	0	2	0	0	0	0	1	0	0	0	0	0	1	0	0	0
LOC105221871	7.85	6.51	6.53	6.57	7.89	5.97	3.64	7.12	7.45	7.58	7.52	6.43	7.48	8.49	8.8	8.27	8.18	9.35	7.85	9.22	4.9	7.24	5.89	10.07	8.86	8.07	9.4	6.07	7.65	8.53	99	107	90	50	107	118	69	128	127	131	130	111	102	121	139	153	166	148	129
LOC105221872	2.08	2.98	3.37	2.85	2.92	2.89	3.08	2.79	3.01	3.03	3.18	3.64	2.94	3.02	3.06	2.45	2.8	2.65	3.14	2.65	3.46	2.48	3.44	2.86	3.15	2.95	2.59	3.04	3.08	2.73	70	131	124	58	106	153	156	134	137	140	147	168	107	115	129	121	152	112	138
LOC105221873	0	0	0	0	0	0	0.06	0	0	0	0	0	0	0	0	0	0	0	0	0	0	0	0	0	0	0	0	0	0	0	0	0	0	0	0	0	1	0	0	0	0	0	0	0	0	0	0	0	0
LOC105221874	0.87	1.36	0.68	1.05	1.3	1.63	1.23	1.09	1.23	1.27	1.6	1.33	1.95	0.96	1.35	1.78	1.36	1.43	1.13	1.61	1.44	1.35	0.95	0.9	1.83	1.89	1.34	1.54	1.39	1.6	33	67	28	24	53	97	70	59	63	66	83	69	80	41	64	99	83	68	56
LOC105221875	0.37	0.07	1.33	0.08	0.3	0.09	0.09	0.07	0.07	0	0.24	0.27	0.3	0.25	0.34	0.8	0.9	0.11	0.54	0.54	0.11	0.06	0.11	0.04	0.05	0.18	0.24	0.15	0.03	0.05	8	2	31	1	7	3	3	2	2	0	7	8	7	6	9	25	31	3	15
LOC105221876	1.55	1.46	1.26	0	0.16	0.88	1.03	0.48	0.77	0.5	2.77	0.63	0.96	0.76	0.28	0.94	1.29	0.55	1.72	0.5	1.44	2.81	0.39	0.31	0.96	0.67	1.9	0.68	0.63	1.39	9	11	8	0	1	8	9	4	6	4	22	5	6	5	2	8	12	4	13
LOC105221877	68.22	68.17	61.76	62.76	71.43	67.24	56.27	52.51	51.07	54.21	63.83	79.84	77.39	68.29	67.89	49.62	48.28	51.7	53.59	58.99	67.53	83.99	76.37	66.71	69.48	64.76	59.31	55.51	59.69	49.21	1722	2244	1703	952	1924	2656	2101	1883	1721	1881	2173	2803	2103	1922	2172	1805	1941	1619	1745
LOC105221878	0.12	0.12	0.07	0.27	0.04	0.13	0.05	0	0.15	0.06	0.03	0.21	0	0.04	0.03	0.14	0	0	0.03	0.06	0	0	0.09	0.11	0	0.03	0.17	0	0.03	0.12	3	4	2	4	1	5	2	0	5	2	1	7	0	1	1	5	0	0	1
LOC105221880	33.91	38.69	32.89	30.93	34.2	32.67	36.6	32.29	35.22	31.26	36.19	32.95	30.57	34.75	33.16	31.46	29.77	30.62	29.92	32.28	40.72	30.35	30.59	32.76	29.38	33.48	28.79	32.01	28.51	37.89	1101	1637	1167	606	1194	1663	1786	1495	1546	1392	1612	1464	1073	1275	1348	1499	1556	1248	1266
LOC105221881	1.31	0.95	1.52	0.98	0.72	0.89	0.82	1.34	0.66	1.09	1.36	0.9	1.07	1.09	1.11	1.18	1.01	1.51	1.39	1.15	0.73	0.68	1.43	1	1.29	1.76	1.01	1.35	1.35	0.84	34	32	43	15	20	36	32	49	23	38	48	32	30	32	36	45	42	49	47
LOC105221882	14.27	15.84	14.37	14.32	14.82	11.6	13.07	12.33	13.21	13.26	17.34	13.22	19.46	14.18	14.32	17.66	15.73	12.3	14.81	13.05	10.25	17.17	13.83	14.58	19.51	18.83	12.27	8.13	9.5	9.85	497	725	540	299	560	625	681	600	628	623	849	647	752	554	632	921	882	529	680
LOC105221883	0	0	0	0	0	0	0	0	0	0	4.45	0	3.25	0	0	8.1	0	0.25	2.14	0.08	0	0	0	0.09	4.96	5.1	0	0	0	0	0	0	0	0	0	0	0	0	0	0	59	0	34	0	0	115	0	3	27
LOC105221884	0	0	0	0	0	0	0	0	0	0	0	0	0	0	0	0	0	0	0	0	0	0	0	0	0	0	0	0	0	0	0	0	0	0	0	0	0	0	0	0	0	0	0	0	0	0	0	0	0
LOC105221885	2.51	2.1	1.81	2.24	3.04	2.52	2.25	2.27	2.44	1.95	2.07	2.67	2	1.91	1.62	2.54	1.6	2.07	1.87	1.88	2.12	1.86	2.43	2.61	1.87	2.02	2.01	1.7	2.33	2.12	93	101	73	50	121	146	125	120	122	99	105	135	80	80	75	138	95	96	90
LOC105221886	0.05	0	0	0	0	0	0	0	0	0	0	0	0	0	0	0	0	0	0	0	0	0	0	0	0.05	0	0.08	0	0	0	1	0	0	0	0	0	0	0	0	0	0	0	0	0	0	0	0	0	0
LOC105221887	0	0	0	0	0	0	0	0	0	0	0	0	0	0	0	0	0	0	0	0	0	0	0	0	0	0	0	0	0	0	0	0	0	0	0	0	0	0	0	0	0	0	0	0	0	0	0	0	0
LOC105221889	0	0	0	0	0	0	0.04	0	0	0	0.2	0	0	0.05	0	0	0	0	0	0	0	0.07	0	0	0.06	0	0	0	0	0	0	0	0	0	0	0	1	0	0	0	5	0	0	1	0	0	0	0	0
LOC105221890	0	0	0	0	0	0.03	0	0	0.04	0	0.15	0	0.18	0	0.12	0.14	0	0	0	0	0	0	0	0	0.06	0.12	0	0	0	0.03	0	0	0	0	0	1	0	0	1	0	4	0	4	0	3	4	0	0	0
LOC105221891	0.08	0.1	0	0	0.04	0.02	0.05	0.03	0.11	0.05	0.05	0.02	0.03	0.05	0.06	0.06	0.06	0.03	0.05	0.03	0.13	0	0.03	0.04	0.16	0.03	0.04	0.01	0.01	0.05	6	9	0	0	3	2	5	3	11	5	5	2	2	4	5	6	7	3	5
LOC105221892	1.63	1.5	1.79	1.12	1.75	0.59	0.92	1.57	1.21	0.62	0.88	1.37	1.08	1.35	1.36	1.09	1.54	1.47	1.31	1.42	1.52	1.64	0.92	1.81	1.74	0.74	1.2	0.92	0.62	1.78	46	55	55	19	53	26	39	63	46	24	34	53	33	43	48	45	70	52	48
LOC105221893	17.29	16.49	19.2	20.46	16.53	21.73	17.58	17.84	16.8	16.02	16.56	15.88	13.93	17.92	14.79	13.63	15.95	18.68	19.32	18.29	17.32	16.98	20	18.54	19.3	12.94	14.84	16.55	14.43	22.3	70	87	85	50	72	138	107	103	92	89	92	88	61	82	75	81	104	95	102
LOC105221894	0.11	0.21	0.04	0.19	0.13	0.01	0.13	0.03	0.25	0.07	0.07	0.12	0.02	0.18	0.23	0.11	0.13	0.11	0.16	0.26	0.29	0.11	0.13	0.08	0.18	0.02	0.19	0.04	0.03	0.12	5	12	2	5	6	1	9	2	15	4	4	7	1	9	13	7	9	6	9
LOC105221895	4.49	3.92	3.68	3.41	4.96	2.72	3.65	3.74	3.46	4.68	2.86	4.08	2.62	4.22	3.58	3.31	4.05	3.72	3.66	4.05	4.19	4.21	4.07	3.34	3.65	3.72	4.22	2.92	3.12	4.3	144	164	129	66	171	137	176	171	150	206	126	179	91	153	144	156	209	150	153
LOC105221896	0.18	0.03	0	0	0.13	0.06	0.03	0.06	0.07	0.07	0.07	0.07	0.08	0.04	0.07	0.09	0.08	0	0.07	0.07	0.16	0.06	0.1	0	0.25	0.07	0.15	0	0	0	4	1	0	0	3	2	1	2	2	2	2	2	2	1	2	3	3	0	2
LOC105221897	2.03	1.44	1.74	2.99	2.07	9.69	3.5	3.31	4.37	4.92	1.32	1.17	1.78	2.28	2.45	2.06	1.37	1.62	2.47	1.85	1.74	1.42	1.39	0.29	3.43	2.1	0.63	0.62	0.98	0.51	82	76	77	73	90	614	213	191	239	273	73	65	78	104	124	122	89	82	130
LOC105221898	0.08	0	0	0.13	0	0.05	0.05	0	0	0	0	0	0	0.07	0	0	0	0	0	0	0	0	0	0.14	0	0	0	0	0	0	1	0	0	1	0	1	1	0	0	0	0	0	0	1	0	0	0	0	0
LOC105221899	0.2	0.36	0.27	0.18	0.33	0.28	0.25	0.08	0.26	0.29	0.31	0.36	0.45	0.41	0.18	0.17	0.12	0.32	0.36	0.21	0.58	0.22	0.23	0.38	0.2	0.43	0.09	0.33	0.5	0.28	9	21	13	5	16	20	17	5	16	18	19	22	22	21	10	11	9	18	21
LOC105221900	8.86	8.03	8.64	6.98	6.62	2.69	0.68	2.14	1.18	2.44	9.11	7.86	12.23	11.57	9.98	1.68	2.08	2.43	2.67	1.58	7.95	7.08	9.97	10.39	11.84	2.01	1.35	1.72	2.33	2.42	61	72	65	29	49	29	7	21	11	23	86	74	91	90	86	17	23	21	24
LOC105221901	0.58	0.22	0.4	0.24	0.27	0	0	0.1	0	0.32	1.68	0.84	1.33	0.77	0.35	0	0.09	0	0	0	1.03	1.26	2.11	1.42	0.8	0.11	0.24	0	0	0.08	4	2	3	1	2	0	0	1	0	3	16	8	10	6	3	0	1	0	0
LOC105221902	1.27	1.52	1.81	2.63	1.47	2.12	3.37	3.45	3.22	1.91	1.62	1.74	1.76	2.45	2.21	4.81	1.77	3.16	4.01	2.76	1.98	2.38	1.52	1.42	2.04	3.36	5.3	4.06	4.75	4.06	16	25	25	20	20	42	64	62	55	33	28	30	24	35	35	89	36	50	66
LOC105221903	13.99	13.49	12.54	12.69	13.25	10.59	10.37	11.24	9.48	10.36	13.46	15.11	15.55	11.9	13.63	11.88	11.84	9.87	13.28	10.88	12.64	15.39	12.13	15.59	16.39	13.99	12.16	8.53	7.31	11.04	824	1035	807	451	839	978	918	944	755	837	1087	1218	990	792	1005	1027	1122	730	1019
LOC105221904	0.13	0.1	0.12	0.1	0.14	0.15	0.27	0.07	0.12	0.14	0.34	0.11	0.31	0.12	0.17	0.34	0.1	0.1	0.35	0.21	0.09	0.17	0.14	0.1	0.37	0.52	0.23	0.13	0.16	0.26	12	13	13	6	14	23	39	10	16	19	45	15	33	13	21	48	16	12	44
LOC105221905	4.3	5.03	5.57	5.2	5.59	5.17	5.39	5.44	5.22	5	6.87	5.75	5.38	5.69	5.73	6.05	5.32	4.32	4.07	4.98	5.58	4.9	5.36	6.24	5.15	6.51	4.83	5.59	5.15	4.66	111	169	157	81	155	209	209	200	182	177	243	203	150	166	185	229	221	140	137
LOC105221906	16.29	13.83	11.85	12.02	15.74	17.11	17.5	13.65	15.93	14.23	15.82	14.89	15.81	13.81	14.11	14.75	13.7	12.84	14.22	15.01	13.83	14.04	13.6	12.25	15.94	15.39	14.23	13.84	14.89	12.88	283	313	225	126	294	466	457	338	374	339	377	354	297	271	307	376	383	280	322
LOC105221907	3.33	3.59	3.8	3.69	3.22	3.68	2.8	3.78	3.97	3.4	3.58	3.91	4.35	4.04	4.29	4.02	3.85	3.93	3.75	4.15	3.9	3.36	4.34	4.64	3.08	4.33	4.74	2.99	2.78	3.08	145	204	181	97	151	251	183	235	234	203	214	233	205	199	234	257	270	215	213
LOC105221908	13.9	13.59	12.43	11.2	13.11	13.52	15.63	14.53	14.85	14.35	14.61	12.82	13.8	12.21	11.99	16.4	14.82	15.16	16.18	15.4	14.66	10.53	13.87	12.6	13.91	17.77	14.14	14.07	11.78	14.93	768	977	749	373	778	1170	1295	1144	1108	1087	1106	968	824	761	829	1329	1317	1051	1164
LOC105221909	0.07	0.39	0.13	0	0.13	0.05	0.05	0.05	0.05	0.05	0.47	0.11	1.2	0.38	0.69	0.05	0.04	0	0.11	0.21	0.34	0.27	0.24	0.39	0.24	0	0	0	0	0	1	7	2	0	2	1	1	1	1	1	9	2	18	6	12	1	1	0	2
LOC105221910	5.69	5.45	5.77	5.45	5.87	4.59	4.73	4.05	5.32	4.27	5.57	4.22	6.82	5.19	2.91	4.78	4.3	5.02	4.16	3.55	4.75	7.11	8.29	5.8	4.56	2.87	2.26	3.08	4.8	3.42	64	80	71	37	71	81	80	65	81	66	86	65	83	66	41	79	78	71	61
LOC105221911	12.84	12.97	15.44	11.6	13.84	12.83	12.88	12.86	12.33	12.95	15.57	14.11	15.95	11.45	13.13	15.04	10.13	10.14	11.75	9.96	11.49	13.64	12.45	11.73	13.35	12.34	10.1	11.27	10.16	11.1	311	408	408	169	360	487	466	442	403	430	500	466	391	312	398	510	392	308	362
LOC105221912	0.64	0.63	0.37	0.29	0.68	0.6	0.56	0.74	0.56	0.62	1.66	0.75	2.1	0.57	0.37	2.35	0.71	0.49	1.21	0.51	0.69	0.55	0.59	0.47	1.73	2.65	0.72	0.39	0.64	0.57	22	28	14	6	25	32	29	36	26	29	78	35	78	22	16	118	39	21	54
LOC105221913	36.21	37.47	35.2	32.62	30.72	36.19	39.16	38.51	32.91	36.64	29.17	28.2	26.78	30.2	30.1	35.13	28.81	31.46	29.61	27.99	29.72	35.31	32.35	29.29	27.85	26.39	33.39	31.55	33.11	27.98	559	754	594	304	510	876	909	848	687	776	618	596	447	527	582	796	716	610	596
LOC105221915	56.53	51.05	43.58	44.5	58.23	60.66	60.25	53.99	51.4	60.45	50.54	51.35	56.04	59.28	50.63	57.14	52.87	49	51.51	50.81	44.93	49.59	43.21	45.92	57.2	51.85	47.46	53.55	63.07	49.14	362	426	305	172	401	609	580	493	445	531	444	450	388	429	406	537	545	394	430
LOC105221916	0	0	0	0	0	0	0	0	0	0	0.79	0	0.78	0	0	2.04	0	0	0.09	0	0	0	0	0	1.74	2.13	0	0	0	0	0	0	0	0	0	0	0	0	0	0	9	0	7	0	0	25	0	0	1
LOC105221917	25.53	26.58	27.62	16.04	17.8	25.2	38.5	32.03	29.12	27.29	18.76	17.4	15.25	16.18	18.67	30.2	32.21	34.38	30.15	28.49	11.17	19.63	16.13	18.91	19.14	27.73	39.1	31.26	31.37	40.76	356	483	421	135	267	551	807	637	549	522	359	332	230	255	326	618	723	602	548
LOC105221918	0	0	0	0	0	0.11	0	0	0	0	0	0	0	0.05	0	0	0	0	0	0	0	0.22	0	0.1	0	0	0	0	0	0.1	0	0	0	0	0	3	0	0	0	0	0	0	0	1	0	0	0	0	0
LOC105221919	1.79	1.23	1.14	1.18	0.83	0.8	1.19	1.38	1.98	1.04	0.91	1.3	1.98	0.47	0.43	1.82	1	1.42	1.37	0.39	1.27	1.12	1	1.44	0.2	0.55	0.45	1.13	0.26	0.82	10	9	7	4	5	7	10	11	15	8	7	10	12	3	3	15	9	10	10
LOC105221920	2.19	2.42	1.07	2.43	0.49	1.7	1.86	0.77	1.19	0.66	1.81	1.38	3.24	1.8	1.24	1.65	1.66	1.55	1.29	1.26	2.03	2	1	1.12	1.31	1.08	1.03	1.49	1.37	1.65	33	48	18	23	9	42	43	18	27	14	37	30	50	29	22	35	40	33	23
LOC105221921	0.07	0.05	0.06	0	0	0	0.04	0	0.05	0.1	0	0	0	0	0.05	0.05	0.04	0	0.05	0	0.08	0	0	0	0	0.1	0	0.05	0.1	0.19	1	1	1	0	0	0	1	0	1	2	0	0	0	0	1	1	1	0	1
LOC105221922	4.43	4.42	3.62	4.25	5.4	5.48	8.33	7.97	8.64	6.88	2.87	3.96	3.21	5.52	3.79	5.91	6.29	6.41	7.54	7.18	5.32	3.51	4.07	3.89	4.02	6.66	6.04	5.35	5.46	6.75	198	258	176	114	260	392	572	510	525	426	176	241	157	281	211	396	461	361	448
LOC105221923	0	0	0	0	0.05	0.04	0	0	0.12	0	0	0.12	0	0.1	0	0	0.07	0.04	0	0	0	0	0	0	0	0	0	0	0	0.03	0	0	0	0	1	1	0	0	3	0	0	3	0	2	0	0	2	1	0
LOC105221924	0	0	0	0	0	0	0	0	0	0	0	0	0	0.06	0	0	0	0.05	0	0	0	0	0.22	0	0	0.05	0	0	0	0	0	0	0	0	0	0	0	0	0	0	0	0	0	1	0	0	0	1	0
LOC105221925	0	0	0	0	0	0.07	0.05	0	0	0	0	0.03	0	0	0	0	0	0	0.03	0	0	0	0	0	0	0.03	0	0	0	0	0	0	0	0	0	3	2	0	0	0	0	1	0	0	0	0	0	0	1
LOC105221926	0	0	0	0	0	0	0.04	0	0	0	0	0	0	0	0.09	0	0	0.14	0	0.04	0	0	0	0.1	0	0	0	0	0.13	0.03	0	0	0	0	0	0	1	0	0	0	0	0	0	0	2	0	0	3	0
LOC105221927	0	0	0.16	0	0	0.03	0	0	0.03	0	0.03	0	0	0.04	0	0	0	0	0	0	0	0	0	0	0.05	0	0	0	0.07	0	0	0	4	0	0	1	0	0	1	0	1	0	0	1	0	0	0	0	0
LOC105221928	16.73	21.72	17.32	18.76	18.38	6.57	11.24	5.57	10.62	9.24	16.07	15.93	12.5	20.26	11.47	9.84	6.98	9.15	7.39	5.03	19.89	10.03	14.63	13.14	10.85	6.44	9.23	5.33	6.05	5.54	198	335	224	134	234	122	200	94	170	150	261	258	160	271	170	171	133	136	114
LOC105221929	0	0	0	0	0	0	0	0	0	0	0	0	0	0	0	0	0	0	0	0	0	0	0	0	0	0	0	0	0	0	0	0	0	0	0	0	0	0	0	0	0	0	0	0	0	0	0	0	0
LOC105221930	0	0	0	0	0	0	0	0	0	0	0	0	0	0	0	0	0	0	0	0	0	0	0	0	0	0	0	0	0	0	0	0	0	0	0	0	0	0	0	0	0	0	0	0	0	0	0	0	0
LOC105221931	1.08	1.34	1.22	0.68	1	0.69	1.4	1.11	0.76	0.64	1.08	1.12	1	1.04	0.82	1.15	1.21	0.94	0.75	0.93	1.16	0.9	1.21	1.15	0.63	1.03	1	0.61	0.97	1.27	21	34	26	8	21	21	41	31	20	17	29	30	21	23	20	33	38	23	19
LOC105221932	0.16	0.22	0.13	0.2	0.29	0.08	0.08	0.13	0.11	0.07	0.54	0.68	0.99	0.33	0.44	0.07	0.15	0.23	0.2	0.07	0.76	0.31	0.28	0.51	0.44	0.14	0.17	0.23	0.14	0.06	8	14	7	6	15	6	6	9	7	5	36	45	52	18	27	5	12	14	13
LOC105221933	0	0	0	0	0	0	0	0	0	0	0	0.06	0	0	0	0.17	0	0	0	0	0	0	0	0	0.19	0.06	0	0	0	0	0	0	0	0	0	0	0	0	0	0	0	1	0	0	0	3	0	0	0
LOC105221934	17.05	16.39	15.12	13.21	16.83	10.44	10.39	11.89	12.04	11.2	14.76	16.98	17.39	15.76	15.43	12.56	13.58	13.52	15.39	13.8	12.8	18.03	16.47	19.77	17.44	13.01	13.82	9.77	9.82	12.49	1031	1291	999	482	1094	990	944	1025	984	929	1224	1405	1137	1077	1168	1114	1322	1026	1213
LOC105221935	0	0	0	0	0	0	0	0	0	0	0	0	0	0	0	0	0	0	0	0	0	0	0	0	0	0	0	0	0	0	0	0	0	0	0	0	0	0	0	0	0	0	0	0	0	0	0	0	0
LOC105221936	0	0	0	0	0	0	0	0	0	0	0	0	0	0	0	0	0	0.07	0	0	0	0	0	0	0	0	0	0	0	0	0	0	0	0	0	0	0	0	0	0	0	0	0	0	0	0	0	1	0
LOC105221937	0	0.08	0.3	0.26	0.61	0.36	0.22	0.15	0.12	0.12	0.21	0.12	0.25	0.19	0.27	0.45	0.18	0.29	0.16	0.08	0.2	0.35	0	0.24	0.12	0.5	0.13	0.11	0.15	0.24	0	2	7	3	14	15	7	4	3	3	6	3	6	4	10	16	6	7	4
LOC105221938	0.04	0.06	0.04	0	0	0	0	0	0	0.03	0	0.03	0.04	0	0	0	0	0	0	0	0	0	0	0.14	0.04	0	0.07	0.03	0	0	1	2	1	0	0	0	0	0	0	1	0	1	1	0	0	0	0	0	0
LOC105221939	0	0	0	0	0	0	0	0	0	0	0	0	0	0	0	0	0	0	0	0	0	0	0	0	0	0	0	0	0	0	0	0	0	0	0	0	0	0	0	0	0	0	0	0	0	0	0	0	0
LOC105221940	7.85	7.25	6.08	6.42	6.69	6.37	6.03	7.47	7.74	7.63	6.98	6.57	6.17	5.58	5.44	7.43	6.78	7.17	7.61	6.36	6.63	6.67	6.19	5.73	5.96	7.73	6.85	6.81	5.28	7.57	666	802	564	329	611	848	770	904	888	888	813	763	566	535	578	926	927	764	842
LOC105221941	0.95	0.78	1.27	2.65	0.31	0.49	1.06	0.43	0.39	0.76	0.31	0.34	2.05	0.49	0.98	0.73	0.84	0.83	0.97	0.85	0.33	2.54	1.52	0.41	0.52	0.47	0.78	1.29	0.74	1.31	31	33	45	52	11	25	52	20	17	34	14	15	72	18	40	35	44	34	41
LOC105221942	0	0.12	0.43	0	0.15	0.4	0.1	0.33	0.12	0	1.35	0.23	1.73	0	0	2.23	0	0.5	2.16	0.45	0	0	0	0.14	2.73	3.61	0	0.12	0	0	0	1	3	0	1	4	1	3	1	0	12	2	12	0	0	21	0	4	18
LOC105221943	4.74	5.17	5.9	6.89	6.6	6.79	6.05	7.12	6.76	7	5.91	7.23	8.21	6.28	5.9	5.8	5.56	5.98	6.11	7.89	6.72	9.08	6.93	5.98	6.06	6.29	6.63	7.68	5.98	6.08	201	284	272	175	302	449	382	430	385	406	342	417	375	297	310	362	380	318	335
LOC105221944	2.02	2.86	1.72	2.06	3.23	2.37	1.35	1.9	2.77	2.15	2.35	3.02	3.42	2.71	2.65	3.01	3.86	3	3.95	3.26	3.21	3.27	3.43	3.08	3.54	3.54	3.72	2.29	1.61	2.79	112	207	104	69	193	206	113	150	208	164	179	229	205	170	184	245	345	209	286
LOC105221945	22.85	35.34	48.18	50.42	48.81	72.85	66.85	56.01	56.02	74.55	41.27	31.59	44.82	30.84	39.29	60.14	85.04	80.9	72.82	80.96	33.04	32.02	35.85	29.56	31.49	55.87	56.98	64.92	61.65	67.82	398	802	917	530	914	1989	1750	1391	1319	1781	986	753	844	607	857	1537	2384	1769	1653
LOC105221946	4.79	4.75	5.14	4.27	4.75	3.28	4.1	3.31	3.65	3.9	3.95	4.66	4.44	3.71	6.37	3.51	4.4	3.73	4.56	3.85	3.67	3.9	3.37	4.52	5.44	4.81	3.14	3.63	3.09	3.65	102	144	126	58	121	114	134	108	112	122	125	140	102	92	172	115	159	104	135
LOC105221947	1.21	0.82	0.74	0.96	0.72	0.73	0.22	0.54	0.6	0.46	1.03	1.05	1.12	1.06	0.76	0.58	0.74	0.55	0.69	0.86	1	1.63	1.98	0.8	0.92	0.77	0.79	0.6	0.67	0.53	69	61	46	33	44	65	19	44	46	36	80	82	69	68	54	48	68	39	51
LOC105221948	0	0.15	0	0	0.09	0.06	0	0.27	0.14	0	0	0	0	0	0	0	0.06	0	0	0.07	0	0.12	0.11	0	0	0	0.16	0.08	0.14	0.06	0	2	0	0	1	1	0	4	2	0	0	0	0	0	0	0	1	0	0
LOC105221949	0.59	0.63	0.92	0.68	0.17	0.55	0.21	0.42	0.51	0.67	1.1	0.57	1.1	0.93	0.62	0.81	0.68	0.36	0.84	0.63	0.49	0.34	0.36	0.29	0.46	0.7	0.23	0.43	1	0.55	13	18	22	9	4	19	7	13	15	20	33	17	26	23	17	26	24	10	24
LOC105221950	37.92	33.95	30.8	29.7	35.38	34.63	32.34	30.84	30.81	32.63	30.18	29.5	26.96	30.02	32.85	31.9	33.09	35.75	35.22	35.5	30.36	35.64	30.9	39.31	28.95	28.32	29.81	32.33	34.57	28.05	294	343	261	139	295	421	377	341	323	347	321	313	226	263	319	363	413	348	356
LOC105221952	37.65	47.2	69.95	60.7	49.85	55.53	52.7	54.75	43.35	61.7	51.15	49.05	47.33	38.16	57.38	40.9	58.29	68.64	55.49	61.62	48.46	52.82	58.02	52.93	53.75	40.41	49.45	49.99	38.31	47.64	557	910	1131	542	793	1288	1172	1155	867	1252	1038	993	757	638	1063	888	1388	1275	1070
LOC105221953	0	0	0	0	0	0	0	0.04	0	0	0	0	0	0	0	0	0	0	0	0	0	0.13	0	0	0	0	0.04	0	0	0	0	0	0	0	0	0	0	1	0	0	0	0	0	0	0	0	0	0	0
LOC105221954	2.46	2.3	2.03	1.46	1.91	1.59	1.17	2	2.18	1.41	1.25	1.61	1.7	1.81	1.59	1.76	1.93	2.05	2.06	2.07	1.67	2.21	2.14	3.23	1.86	1.75	1.9	1.8	1.39	2.29	142	173	128	51	119	144	102	165	170	112	99	127	106	118	115	149	180	149	155
LOC105221955	18.35	25.74	21.64	21.96	20.29	19.4	18.83	18.99	20.94	21.08	22.58	22.98	24.74	20.81	21.28	20.74	18.11	17.8	17.91	18.34	21.35	20.82	19.9	18.07	21.09	19.53	16.64	20.33	19.12	19.28	551	1007	710	398	655	913	850	813	850	868	930	944	803	706	800	914	875	671	701
LOC105221956	7.8	6.72	8.53	4.41	11.5	6.55	5.57	7.74	4.79	7.77	4.99	5.84	5.81	8.42	8.05	8.17	6.62	8.34	6.86	6.5	7.24	5	4.92	4.59	6.38	6.6	6.93	3.3	8.76	6.79	41	46	49	14	65	54	44	58	34	56	36	42	33	50	53	63	56	55	47
LOC105221960	0	0	0.28	0	0	0	0	0	0	0	0	0	0.05	0	0	0	0	0	0	0	0	0	0	0	0	0	0	0	0	0	0	0	6	0	0	0	0	0	0	0	0	0	1	0	0	0	0	0	0
LOC105221962	0	0.09	0	0	0.1	0	0.08	0	0	0	0	0.08	0	0	0.09	0	0	0	0	0	0	0	0	0.1	0	0	0	0.09	0	0	0	1	0	0	1	0	1	0	0	0	0	1	0	0	1	0	0	0	0
LOC105221963	0	0.03	5.9	0	0	0	0.09	0.03	0	0	0.03	0.1	5.02	0.04	2.38	0	1.33	0.04	0.17	0	0	0	0.2	0	0	0.03	0.04	0	0	0	0	1	145	0	0	0	3	1	0	0	1	3	122	1	67	0	48	1	5
LOC105221964	12.7	15.83	15.42	14.53	15.35	15.88	16.96	15.74	17.49	16.3	15.24	16.93	15.3	14.33	16.12	16.56	15.35	13.32	13.58	17.01	15.21	15.25	16.41	15.12	14.26	14.29	16.45	15.64	16.99	14.36	404	656	536	279	525	792	811	714	752	711	665	737	526	515	642	773	786	532	563
LOC105221965	40.08	32.93	33.48	30.31	32	33.97	30.43	33.61	29.24	32.71	35.57	33.19	32.84	34.7	37.92	27.53	28.62	30.01	28.16	33.15	30.3	33.5	31.73	36.31	34.79	28.02	30.25	26.45	28.8	27.7	368	394	336	168	316	489	420	440	363	412	448	417	326	360	436	371	423	346	337
LOC105221966	591.18	588.9	535.02	565.07	534.98	551.59	588.65	611.66	654.11	612.63	516.68	514.81	518.31	564.76	531.06	619.14	620.11	623.9	610.04	614.6	536.93	532.21	507.67	561.83	503.42	591.24	604.94	613.28	683.65	638.13	8455	10976	8363	4878	8228	12369	12656	12475	12648	12019	10138	10077	8015	9128	9512	12996	14277	11204	11373
LOC105221967	5.06	4.28	5.18	6.42	5.91	6.38	5.44	4.93	4.3	5.99	7.12	6.98	5.48	4.7	5.37	4.47	5.1	4.44	5.51	6.22	7.48	5.76	4.83	5.65	5.78	5.87	5.36	3.62	6.55	4.37	58	64	65	44	74	118	95	82	69	97	115	108	69	62	77	75	96	65	82
LOC105221968	9.82	8.37	10.58	9.58	9.02	4.92	3.85	4.65	4.14	4.48	7.95	9.33	9.03	7.2	9.72	3.86	2.99	3.41	3.28	4.68	7.45	8.96	6.5	8.29	6.39	4.04	3.06	4.23	3.26	3.64	163	181	192	96	161	128	96	110	93	102	181	212	162	135	202	94	80	71	71
LOC105221969	19.78	18.34	20.05	16.82	18.18	22.64	22.6	23.72	20.05	20.98	19.59	16.9	19.98	19.53	19.27	22.47	20.68	20.01	22.9	20.91	19.34	19.19	17.52	21.02	16.46	20.06	20.49	22.27	23.64	21.66	259	313	287	133	256	465	445	443	355	377	352	303	283	289	316	432	436	329	391
LOC105221970	4.1	3.83	8.48	2.07	4.47	4.89	5.57	3.25	5.01	4.16	4.29	4.82	3.79	3	5.12	4.25	4.65	4.4	3.69	5.05	6.36	5.35	5.01	7.17	5.57	5.08	3.77	3.51	5.34	4.82	23	28	52	7	27	43	47	26	38	32	33	37	23	19	36	35	42	31	27
LOC105221972	0.58	0.55	0.53	0.36	1.14	0.41	0.14	0.3	0.16	0.32	19.97	0.42	22.06	0.9	0.4	22.07	0.18	0.17	8.04	0.26	0.09	0.36	0.57	0.26	17.36	24.28	0.24	0.46	0.16	0.21	8	10	8	3	17	9	3	6	3	6	379	8	330	14	7	448	4	3	145
LOC105221973	0.15	0.14	0.07	0	0.14	0.14	0.07	0.31	0.21	0.08	0.19	0.22	0.09	0.18	0.18	0.25	0.23	0.15	0.13	0.15	0.11	0.12	0.1	0.18	0.08	0.07	0.19	0.1	0.07	0.21	8	10	4	0	8	12	6	24	15	6	14	16	5	11	12	20	20	10	9
LOC105221974	1.69	2.45	2.03	2.12	1.32	0.94	1.13	0.73	0.97	1.35	3.2	2.64	2.5	2.38	2.56	1.12	1.45	1.06	0.89	1.28	2.3	2.68	2.89	1.75	1.86	0.99	0.6	0.89	1.11	1.12	36	68	47	27	30	31	36	22	28	39	94	78	58	57	69	35	50	28	25
LOC105221975	0	0	0.15	0.09	0.15	0	0	0	0	0	0	0.16	0	0	0.04	0	0	0	0	0	0	0.14	0	0	0.06	0	0	0	0	0	0	0	3	1	3	0	0	0	0	0	0	4	0	0	1	0	0	0	0
LOC105221976	0.14	0	0.04	0	0	0	0.03	0	0	0	0	0	0	0	0	0	0	0	0	0.03	0	0	0	0	0	0.04	0	0	0	0	3	0	1	0	0	0	1	0	0	0	0	0	0	0	0	0	0	0	0
LOC105221977	0.04	0	0.22	0.07	0	0	0	0	0.09	0.06	0.03	0.12	0.33	0	0.16	0.05	0	0.1	0.12	0.09	0.1	0	0.05	0	0.04	0.09	0.07	0	0.09	0.02	1	0	6	1	0	0	0	0	3	2	1	4	9	0	5	2	0	3	4
LOC105221978	0	0.1	0	0.32	0.06	0.04	0	0	0	0	0.02	0.07	0	0	0	0.02	0.02	0.03	0.1	0	0	0	0.04	0.03	0	0.05	0	0	0	0.21	0	4	0	6	2	2	0	0	0	0	1	3	0	0	0	1	1	1	4
LOC105221979	18.46	12.19	14.53	11.79	16.21	14.14	18.39	17.87	14.04	19.4	10.53	12.81	12.21	13.42	12.44	15.25	18.9	23.17	22.47	18.43	13.98	12.77	10.67	17.7	14.51	14.06	20.96	14.8	14.77	18.87	179	154	154	69	169	215	268	247	184	258	140	170	128	147	151	217	295	282	284
LOC105221980	0	0.04	0.04	0.24	0.04	0.06	0.13	0	0.04	0.03	0.1	0.03	0.22	0.21	0.19	0.16	0	0	0.18	0	0.06	0	0	0.09	0.21	0.26	0.04	0	0.14	0.06	0	1	1	3	1	2	4	0	1	1	3	1	5	5	5	5	0	0	5
LOC105221982	0	0	0	0	0	0	0	0	0	0	0	0	0	0	0	0	0	0	0	0	0	0	0	0	0	0	0	0	0	0	0	0	0	0	0	0	0	0	0	0	0	0	0	0	0	0	0	0	0
LOC105221983	0	0	0	0	0	0	0.1	0	0.02	0.02	0	0.11	0.05	0.05	0.12	0.02	0.02	0	0	0.04	0.03	0.04	0.03	0	0	0	0	0.02	0.02	0	0	0	0	0	0	0	5	0	1	1	0	5	2	2	5	1	1	0	0
LOC105221984	2.49	2.83	3.38	1.86	3.04	2.01	2.21	2.12	3.09	2.83	2.59	3.07	2.62	2.04	3.33	2.68	2.99	2.26	2.75	2.45	2.89	3.38	3.4	2.63	2.63	1.83	2.65	3	2.33	3.28	93	138	138	42	122	118	124	113	156	145	133	157	106	86	156	147	180	106	134
LOC105221985	236.64	235.39	214.64	224.86	245.4	202.33	205.53	182.23	203.2	207.72	225.53	290.07	306.24	236.01	282.42	206.85	181.44	208.21	201.57	191.43	241.05	301.88	294.29	234.32	240.77	203.38	219.1	204.88	205.72	189.06	4541	5858	4422	2625	5012	6049	5883	4918	5184	5335	5888	7473	6275	5030	6684	5785	5503	4931	4982
LOC105221986	38.97	33.24	40.05	35.18	37.4	35.26	36.74	33.39	36.63	40.26	37.44	41.5	37.46	36.86	40.13	41.56	39.12	35.11	39.88	41.53	33.03	42.23	36.95	41.27	36.62	35.6	37.71	36.27	35.68	36.38	1118	1261	1255	611	1147	1555	1564	1350	1410	1561	1461	1613	1173	1189	1449	1700	1763	1222	1441
LOC105221987	0.62	0.85	0.76	0.4	0.19	0.66	0.57	0.53	0.92	0.6	0.45	0.45	0.26	0.61	0.74	0.4	0.47	0.52	0.61	0.73	0.49	0.78	0.43	0.65	0.27	0.35	0.5	0.35	0.25	0.3	18	32	24	7	6	30	25	22	36	24	18	18	8	20	27	17	22	19	23
LOC105221988	0.46	0.25	0.33	0.73	0.67	0.48	0.14	0.39	0.47	0.31	0.74	0.37	0.5	1.04	0.69	0.67	0.78	0.45	0.68	0.74	0.78	0.93	0.67	0.87	1.12	0.49	0.49	0.46	0.29	0.75	54	41	37	45	71	82	25	56	72	46	108	57	53	125	83	94	131	66	89
LOC105221989	0.46	0.88	0.42	0.76	0.94	0.12	0.12	0.03	0	0.07	0.6	1.18	0.72	1.02	1.39	0.03	0.14	0.07	0.07	0.03	0.71	1.49	0.88	0.41	0.46	0.04	0.04	0.18	0	0.21	10	25	10	10	22	4	4	1	0	2	18	35	17	25	38	1	5	2	2
LOC105221990	0	0	0	0	0	0.05	0	0	0	0	0	0	0	0	0	0	0	0	0	0	0	0	0	0	0	0	0	0	0	0	0	0	0	0	0	1	0	0	0	0	0	0	0	0	0	0	0	0	0
LOC105221991	51.92	46.87	44.18	44.63	46.03	16.92	13.8	14.4	13.6	11.64	44.72	41.92	46.96	49.22	53.67	10.42	11.38	11.48	7.96	10.76	51.88	51.7	82.34	47.13	54.38	11.57	13.11	11.68	11.41	15.58	771	907	717	400	735	394	308	305	273	237	911	852	754	826	998	227	272	214	154
LOC105221992	0	0	0	0	0	0	0	0	0.07	0.07	0	0	0	0	0.15	0	0	0	0	0.21	0	0	0.22	0.09	0	0	0	0.15	0	0.06	0	0	0	0	0	0	0	0	1	1	0	0	0	0	2	0	0	0	0
LOC105221993	0.95	0.22	2.09	1.73	0.71	0.42	0.06	0.4	0.28	0.21	0.55	0.56	0.88	3.11	0.38	0.71	1.36	1.51	1.02	0.41	1.02	0.83	0.86	1.7	1.06	0.95	0.08	0	0	0.16	10	3	24	11	8	7	1	6	4	3	8	8	10	37	5	11	23	20	14
LOC105221994	0	0	0	0.1	0	0	0	0	0	0	0	0.04	0	0.05	0	0	0	0	0	0	0	0	0	0	0	0	0	0	0	0	0	0	0	1	0	0	0	0	0	0	0	1	0	1	0	0	0	0	0
LOC105221995	7.38	6.89	8.97	6.75	6.72	3.31	2.47	3.73	3.6	3.49	7.1	6.86	5.68	7.03	7.97	3.1	3.37	2.89	2.85	3.26	6.77	7.82	8.13	7.91	7.45	2.48	3.32	2.44	2.78	3.99	250	304	332	138	245	176	126	180	165	162	330	318	208	269	338	154	184	123	126
LOC105221996	8.83	10.86	8.23	6.17	6.02	4.17	5.83	4.1	4.15	3.55	6.73	9.17	10.44	10.3	6.73	3.36	4.38	5.25	2.9	2.87	9.47	9.53	13.28	7.79	8.13	2.96	4.71	3.7	2.85	5.7	154	247	157	65	113	114	153	102	98	85	161	219	197	203	147	86	123	115	66
LOC105221997	0	0	0	0	0	0	0	0	0	0	0	0	0	0	0	0	0	0	0	0	0	0	0	0	0	0	0	0	0	0	0	0	0	0	0	0	0	0	0	0	0	0	0	0	0	0	0	0	0
LOC105221998	0	0	0	0	0	0	0.06	0	0	0	0	0	0	0.16	0	0	0	0.07	0	0	0	0	0	0	0.1	0	0	0	0	0	0	0	0	0	0	0	1	0	0	0	0	0	0	2	0	0	0	1	0
LOC105221999	0	0	0	0	0	0	0	0	0	0	0	0	0	0.08	0	0	0	0	0	0.13	0	0	0	0	0	0	0	0	0	0	0	0	0	0	0	0	0	0	0	0	0	0	0	1	0	0	0	0	0
LOC105222000	0	0	0	0	0	0	0	0	0	0	0	0	0	0	0	0	0	0	0	0	0	0	0	0	0	0	0	0	0	0	0	0	0	0	0	0	0	0	0	0	0	0	0	0	0	0	0	0	0
LOC105222001	0.77	0.68	0.93	0.49	0.77	0.36	0.37	0.45	0.4	0.6	1.27	0.62	1.46	0.62	0.52	1.24	0.44	0.3	0.59	0.32	0.78	0.84	0.86	0.49	1	0.75	0.37	0.36	0.32	0.39	55	63	73	21	59	40	40	46	39	59	125	61	113	50	47	130	51	27	55
LOC105222002	0	0	0	0	0	0	0	0	0.11	0	0.1	0	0	0	0.23	0	0.09	0.11	0.11	0	0	0.18	0	0	0.16	0	0	0	0	0	0	0	0	0	0	0	0	0	1	0	1	0	0	0	2	0	1	1	1
LOC105222003	0	0	0	0	0.03	0	0	0	0	0.02	0.57	0	0.47	0	0	0.21	0	0	0.05	0.02	0	0	0	0	0.26	0.37	0	0	0	0.06	0	0	0	0	1	0	0	0	0	1	23	0	15	0	0	9	0	0	2
LOC105222004	0.32	0.21	0.33	0.19	0.19	0.41	0.29	0.25	0.23	0.29	0.29	0.17	0.07	0.04	0.16	0.22	0.53	0.2	0.21	0.35	0.55	0.15	0.26	0	0.52	0.06	0.15	0.22	0.23	0.43	8.12	7.11	9.2	3.01	5.23	16.26	11.11	9.01	7.88	10.28	10.1	6.06	2.07	1.03	5.15	8.23	21.9	6.3	7.01
LOC105222005	3.16	3.02	4.47	3.46	3.6	2.92	3.04	3.76	2.83	4.08	3.15	3.31	4.13	3.63	3.79	3.91	4.47	4.31	4.64	4.01	3.55	4.39	4.59	2.92	3.83	2.99	3.98	3.54	3.39	4.05	155.88	193.89	240.8	102.99	190.77	225.74	224.89	263.99	188.12	275.72	212.9	222.94	219.93	201.97	233.85	282.77	354.1	266.7	297.99
LOC105222006	65.73	84.67	103.27	72.27	74.9	77.74	123.22	90.82	91.85	92.73	117.04	80.18	115.22	74.78	94.85	115.61	72	87.27	84.18	70.75	104.65	91.65	72.7	74.37	118.77	124.11	74.65	104.35	100.57	81.94	1248	2077	2119	830	1537	2273	3503	2449	2344	2401	2977	2068	2321	1587	2245	3208	2188	2057	2081
LOC105222007	19.21	16.91	20.4	19.64	19.89	20.54	19.5	18.23	17.98	16.09	19.05	21.82	19.29	17.8	19.52	19.63	17.38	15.49	16.75	17.1	20.68	19.61	20.51	18.85	19.05	17.51	18.14	16.44	16.53	15.61	572	656	664	353	637	959	873	774	724	657	778	889	621	599	728	858	833	579	650
LOC105222008	332.04	282.88	264.92	276.54	298.84	224.04	251.62	272.54	257.58	260.38	258.88	277.91	286.98	284.2	270.93	297.53	310.26	331.09	338.28	323.59	248.82	313.81	282.83	356.58	324.96	276.89	294.12	240.32	250.63	300.62	11822	12925	10093	5794	11309	12583	13788	14270	12651	13264	12535	13067	10809	11484	11700	15533	17966	15137	15800
LOC105222009	246.25	359.4	343.8	269.07	323.1	519.01	583.63	556.43	540.92	613.44	297.37	304.17	280.72	335.28	279.42	556.4	659.34	725.03	628.77	614.05	356.84	256.47	317.51	294.17	279.29	564.4	639.01	666.61	592.01	677.95	10409	19798	15883	6865	14687	34398	37086	33541	30913	35570	17245	17597	12830	16016	14792	34518	44866	38481	34645
LOC105222010	0.47	0.6	0.45	0.81	0.97	0.42	0.23	0.41	0.41	0.33	0.58	0.97	0.65	0.63	0.8	0.41	0.44	0.38	0.83	0.81	0.48	0.79	0.75	0.82	1.06	0.32	0.76	0.2	0.27	0.45	44	73	46	46	98	62	33	55	52	43	75	125	66	67	94	57	66	45	101
LOC105222011	15.46	17.55	16.32	15.01	18.07	12.6	14.83	12.26	14.23	15.43	16.95	18.21	14.89	20.01	17.15	10.59	12.42	12.5	12.43	13.08	15.07	15.67	17.18	17.04	14.75	11.94	13.55	12.19	11.73	12.98	452	670	520	265	570	578	654	507	560	616	681	730	471	662	630	453	578	457	475
LOC105222012	60.92	57.36	58.39	56.56	65.31	35.83	38.97	33.88	37.61	33.43	57.72	67.22	53.02	57.77	54.21	32.26	35.63	36.88	38.92	34.35	57.29	58.53	65.66	67.3	59.87	34.03	39.66	28.95	25.9	41.42	2034	2496	2131	1140	2345	1876	1956	1613	1698	1531	2644	3072	1914	2180	2267	1581	1915	1546	1694
LOC105222013	1.71	1.88	1.94	1.38	1.99	1.45	1.59	1.73	1.64	1.55	2.33	2.48	2.75	1.76	2.01	1.28	1.37	1.71	1.44	1.83	1.46	1.86	2.09	2.47	2.15	1.25	2.59	1.05	1.68	1.51	78	112	97	38	98	104	109	113	101	97	146	155	136	91	115	86	101	98	86
LOC105222014	139.99	135.76	145.16	130.97	149.79	140.4	137.15	137.37	137.07	136.81	148.62	143.02	147.1	137.68	141.15	126.59	130.66	128.35	133.5	129.87	135.29	145.51	149.43	148.46	151.17	123.72	126.09	136.69	134.66	120.33	1785	2256	2023	1008	2054	2807	2629	2498	2363	2393	2600	2496	2028	1984	2254	2369	2682	2055	2219
LOC105222015	0	0	0	0	0	0.18	0	0	0	0	2.52	0	3.64	0	0	3.47	0	0	0.66	0	0.11	0	0.11	0	2.14	3.99	0	0	0	0	0	0	0	0	0	3	0	0	0	0	36	0	41	0	0	53	0	0	9
LOC105222016	11.19	12.69	11.98	11.44	11.72	11.52	9.7	12.1	14.01	13.02	11	12.37	10.97	12.17	11.7	12.14	13.47	12.68	13.03	13.97	12.44	11.57	11.71	11.61	12.3	12.02	13.76	12.46	8.95	13.67	2030	3000	2374	1252	2286	3276	2646	3131	3435	3239	2738	3071	2151	2495	2658	3232	3933	2889	3080
LOC105222017	0	0	0	0	0	0	0	0	0	0	7.21	0.05	7.28	0	0	7.39	0	0.05	1.85	0	0	0	0	0	6.45	7.33	0.05	0	0	0	0	0	0	0	0	0	0	0	0	0	156	1	124	0	0	171	0	1	38
LOC105222018	0.92	0.83	0.35	0.45	0.65	1.24	1.08	0.87	1.96	0.87	1.06	0.79	0.8	0.72	0.82	0.77	0.84	1.12	1.12	0.67	0.83	0.67	0.36	1.4	1.27	1.66	0.78	0.85	0.47	1.09	17	20	7	5	13	36	30	23	49	22	27	20	16	15	19	21	25	26	27
LOC105222019	0	0.06	0.07	0	0	0	0	0	0	0	5.09	0	5.75	0	0	6.56	0	0	1.8	0	0	0.09	0	0	5.42	6.37	0	0.06	0	0	0	1	1	0	0	0	0	0	0	0	92	0	82	0	0	127	0	0	31
LOC105222020	0	0	0	0	0	0	0	0	0	0	4.76	0	4.55	0	0	4.35	0	0	1.01	0	0	0	0	0.07	2.95	3.05	0.06	0	0	0	0	0	0	0	0	0	0	0	0	0	89	0	67	0	0	87	0	0	18
LOC105222021	0	0	0.08	0	0	0	0	0	0	0	5.42	0	5.05	0	0	3.29	0	0.07	0.82	0	0	0	0	0	4.2	6	0	0	0	0	0	0	1	0	0	0	0	0	0	0	83	0	61	0	0	54	0	1	12
LOC105222022	0	0	0	0	0	0	0	0	0	0	1.37	0	2.37	0	0	2.83	0	0	0.58	0	0	0	0	0	3.2	1.68	0	0	0	0	0	0	0	0	0	0	0	0	0	0	25	0	34	0	0	55	0	0	10
LOC105222023	5.61	7.11	5.69	4.68	6.31	5.67	5.73	3.58	4.66	4	6.48	5.69	4.94	4.83	6.06	4.91	4.88	4.56	3.95	4.63	6.71	6.25	6.26	5.76	6.86	5.02	4.65	3.37	3.34	4.56	147	243	163	74	178	233	226	134	165	144	233	204	140	143	199	189	206	150	135
LOC105222024	8.44	7.39	7.56	5.96	7.65	6.91	5.81	6.01	5.86	5.15	9.21	7.07	9.35	7.69	7.59	5.89	5.27	5.32	4.6	4.7	6.01	6.96	7.51	5.59	7.65	6.73	4.42	4.9	5.91	5.52	197	225	193	84	192	253	204	200	185	165	295	226	236	203	222	202	198	156	140
LOC105222025	4.8	3.87	4.1	2.91	4.39	5.56	6.76	5.89	5.44	5.36	8.8	3.97	8.43	4.25	4.02	7.3	5.27	5.48	5.64	3.72	3.61	3.9	4.32	5.36	6.34	7.27	3.79	3.97	6.19	5.15	60	63	56	22	59	109	127	105	92	92	151	68	114	60	63	134	106	86	92
LOC105222026	3.02	3.14	3.63	2.33	2.3	3.94	3.2	2.93	2.9	2.33	5.9	3.18	4.69	3.2	2.93	5.02	2.78	2.99	2.91	2.63	2.48	2.24	3.4	3.05	4.95	3.61	2.49	2.65	1.71	2.65	71	96	93	33	58	145	113	98	92	75	190	102	119	85	86	173	105	88	89
LOC105222027	0.04	0	0	0	0	0	0.06	0	0	0	0	0.03	0	0	0.07	0	0	0	0	0	0	0	0	0	0	0.03	0	0	0	0	1	0	0	0	0	0	2	0	0	0	0	1	0	0	2	0	0	0	0
LOC105222028	33.48	34.08	28.58	28.65	31.12	22.95	24.82	28.76	29.11	28.31	19.78	25.36	21.04	31.59	26.57	36.74	45.56	48.76	56.17	43.21	18.44	21.76	24.38	43.93	30.26	33.39	36.73	25.2	24.67	45.25	1008.02	1339	938.53	521	1006	1080.71	1121.55	1235.59	1178.7	1171.73	812.33	1038.22	684	1072.27	998	1621.25	2205.23	1839.16	2197.2
LOC105222029	9.65	9.77	10.8	8.85	10.41	8.58	8.67	8.78	7.44	6.89	8.23	7.65	8.93	9.45	10.41	6.23	6.76	8.91	6.07	9.25	7.57	8.34	9.24	7.8	9.06	5.93	5.48	8.9	8.1	7.09	94	124	115	52	109	131	127	122	98	92	110	102	94	104	127	89	106	109	77
LOC105222030	33.05	35.58	35.85	28.83	35.2	35.4	35.78	34.44	29.82	30.09	34.4	34.76	29.83	32.24	32.59	32.9	32.38	33.93	29.29	34.77	33.59	27.08	32.06	23.27	29.97	33.14	29.43	33.39	32.22	32.51	792	1111	939	417	907	1330	1289	1177	966	989	1131	1140	773	873	978	1157	1249	1021	915
LOC105222031	6.42	6.63	8.6	8.31	9.28	10.72	10.91	13.34	9.97	13.7	8.17	9.98	7.5	6.87	7.88	11.37	13.92	13.11	12.98	12.29	7.98	8.24	9.78	5.27	7.95	12.36	11.07	13.11	13.09	12.02	110	148	161	86	171	288	281	326	231	322	192	234	139	133	169	286	384	282	290
LOC105222032	107.39	108.63	91.03	113.74	105.83	130.72	153.44	140.63	137.76	148.83	97.84	110.57	97.82	97.37	103.14	130.29	133.61	157.04	143.42	154.75	106.37	98.79	101.69	75.58	99.28	121.51	158.46	140.59	175.58	134.84	1606	2147	1520	1024	1707	3058	3496	3067	2771	3065	2017	2270	1592	1672	1960	2892	3285	2971	2818
LOC105222033	0.13	0.1	0	0.11	0.42	0.16	0.04	1.04	0.71	0.56	0.6	0.52	0.59	0.11	0	0.09	0.28	0.51	0.2	0.65	0.31	0.32	0.35	0.17	0.72	0.15	0.76	0.05	0.47	0.3	2	2	0	1	7	4	1	23	14.9	12	12.84	11	10	2	0	2	7	10	4
LOC105222034	52.54	55.02	47.7	53.69	48.06	83.97	51.52	56.35	46.35	48.23	49.28	62.96	45.71	49.27	53.38	47.18	47.89	45.8	44.29	53.66	49.75	54.15	45.67	37.86	45.27	43.06	62.42	44.13	57.87	36.48	673	919	673	412	663	1686	995	1031	806	853	866	1104	633	717	863	883	982	733	738
LOC105222035	5.98	6.93	5.13	4.84	5.6	7.28	8.06	7.85	9.36	7.92	5.7	6.89	5.65	6.76	5.44	9.57	9.63	10.45	9.19	9.97	6.26	6.15	6.49	5.75	5.52	9.91	10.12	7.33	7.24	10.4	543	816	504	267	540	1018	1091	1009	1128	963	711	853	546	689	618	1255	1399	1164	1085
LOC105222036	5.23	4.23	4.65	3.91	5.39	3.56	4.43	3.97	4.13	3.34	4.44	2.98	4.9	3.36	4.46	4.24	3.56	3.65	2.58	4	4.17	3.94	4.35	3.33	4.32	3.36	3.88	2.77	3.66	2.22	73	77	71	33	81	78	93	79	78	64	85	57	74	53	78	87	80	64	47
LOC105222037	0.28	0.18	0.08	0.08	0.26	0.6	0.44	0.07	0.14	0.24	0.3	0.55	0.35	0	0.3	0.29	0.03	0.34	0.22	0.27	0.28	0.18	0	0.29	1.62	0.54	0.24	0.07	0.51	0	6	5	2	1	6	20	14	2	4	7	9	16	8	0	8	9	1	9	6
LOC105222038	30.26	20.65	23.67	21.17	25.71	22.37	21.11	19.9	21.14	22.67	24.73	27.16	25.08	23.17	23.75	20.33	18.73	19.01	18.48	18.03	24.78	31.95	27.33	23.02	19.76	17.34	22.43	21.63	24.7	19.88	289	257	247	122	264	335	303	271	273	297	324	355	259	250	284	285	288	228	230
LOC105222039	2.45	1.47	2.02	1.67	1.61	1.96	1.82	1.95	1.38	2.24	2.38	1.54	1.6	1.44	1.69	1.9	1.64	1.41	1.62	1.78	1.71	1.32	1.46	1.97	1.5	1.85	1.42	1.67	1.72	1.74	51	40	46	21	36	64	57	58	39	64	68	44	36	34	44	58	55	37	44
LOC105222040	18.96	18.1	19.75	16.3	20.25	15.55	12.8	14.22	12.9	15.38	20.74	20.93	20.11	18.22	18.77	12.82	12.94	12.22	10.04	11.56	17.78	17.44	19.8	16.37	17.19	14.61	11.75	12.36	14.01	11.39	443	563	510	235	513	580	455	487	416	494	663	674	515	491	561	453	489	359	312
LOC105222041	8.56	7.3	6.23	7.35	8.49	5.46	6.66	5.15	5	5.78	7.52	7.21	6.21	7.23	6.34	5.74	6.48	5.4	4.91	6.31	5.82	6.14	6.08	7.6	7.72	5.47	5.94	6.11	6.59	4.61	126	140	101	65	134	126	148	109	100	117	152	146	99	120	117	124	153	100	94
LOC105222042	0	0	0	0.04	0	0	0	0	0	0	3.09	0	1.77	0	0	2.64	0	0	0.85	0	0	0	0	0	2.05	2.79	0.02	0	0	0	0	0	0	1	0	0	0	0	0	0	169	0	76	0	0	154	0	0	44
LOC105222043	0	0	0	0	0	0.04	0	0	0	0	0.19	0	0.3	0	0	0.3	0	0	0.1	0	0	0	0	0	0.21	0.1	0	0	0	0	0	0	0	0	0	1	0	0	0	0	4	0	5	0	0	7	0	0	2
LOC105222044	0	0.16	0.19	0	0	0	0	0	0	0	7.76	0	10.23	0	0	12.02	0	0	3.52	0.08	0	0	0.12	0	8.97	16.24	0	0	0.08	0.06	0	2	2	0	0	0	0	0	0	0	102	0	106	0	0	169	0	0	44
LOC105222045	0.05	0.08	0.05	0	0	0.1	0.1	0.04	0.07	0	0	0.11	0	0	0	0	0	0.36	0.08	0.11	0.12	0	0	0.04	0	0	0.13	0.08	0	0.12	1	2	1	0	0	3	3	1	2	0	0	3	0	0	0	0	0	9	2
LOC105222047	31.38	31.25	32.09	26.18	23.71	18.03	19.42	26.86	26.11	25.48	17.07	18.21	24.43	25.52	22.29	17.29	18.85	11.12	19.2	12.23	25.24	27.98	26.6	23.82	19.33	19.55	21	15.28	13.48	14.8	272	353	304	137	221	245	253	332	306	303	203	216	229	250	242	220	263	121	217
LOC105222048	0.32	0.08	2.24	0.35	0.49	1.49	0.85	1.04	2.12	0.85	0.23	0.7	1.48	0.38	0.42	0.94	2.05	1.44	2.04	1.08	0.25	0.27	0.36	0.29	0.24	1.31	1.08	0.59	1.09	0.31	3	1	23	2	5	22	12	14	27	11	3	9	15	4	5	13	31	17	25
LOC105222049	6.3	7.59	5.93	5.43	7.19	4.77	6.21	6.76	7.43	5.6	7.67	6	8.25	7.31	8.61	7.52	6.52	7.57	6.94	6.28	7.89	7.82	6.61	8.16	7.69	8.19	5.92	6.09	6.61	8.7	248	389	255	129	304	294	367	379	395	302	414	323	351	325	424	434	413	374	356
LOC105222050	19.42	21.54	21.99	18.74	21.53	20.35	21.01	22.75	22.42	24.43	18.9	18.4	13.31	18.89	19.17	18.9	17.43	18.87	16.86	18.6	17.51	24.95	21.49	20.03	19.31	17.26	17.8	21.45	17.15	18.6	182	263	226	106	217	299	296	304	284	314	243	236	135	200	225	260	263	222	206
LOC105222051	4.15	4.11	4.62	3.29	3.75	4.4	4.16	4.84	5.83	3.68	4.27	4.85	4.69	4.08	4.57	5.66	6.93	7.57	7.93	5.96	3.7	5.51	5.06	7.5	6.62	6.87	6.77	3.93	3.52	6.26	180	232	219	86	175	299	271	299	342	219	254	288	220	200	248	360	484	412	448
LOC105222052	0.18	0.09	0	0	0	0	0	0.09	0	0	0	0	0.11	0	0	0.32	0	0.09	0.18	0	0	0.22	0	0	0	0	0.31	0	0.13	0	1	1	0	0	0	0	0	1	0	0	0	0	1	0	0	4	0	1	2
LOC105222053	29.13	24.98	23.72	24.19	24.39	24.35	21.62	23.09	24.46	25.65	24.33	28.1	30.17	27.73	24.11	24.55	27.63	26.54	30.3	28.22	26.11	30.39	25.39	32.18	30.45	25.94	24.85	23.67	22.67	24.14	643	714	561	325	587	845	718	733	729	785	736	861	713	700	658	791	985	732	866
LOC105222054	8.14	7.65	6.97	8.36	8.1	6.1	6.1	8.2	6.4	7.77	7.23	9.25	7.32	6.75	8.28	6.21	6.76	7.26	7.65	7.41	4.7	9.1	6.58	9.17	8.26	6.09	6.99	6.96	5.61	7.32	142	174	133	88	152	167	160	204	151	186	173	221	138	133	181	159	190	159	174
LOC105222055	35.31	45.21	44.65	51.05	42.24	67.56	57.26	60.56	65.68	67.74	52.3	49.75	48.86	53.54	57.96	71.61	67.09	73.55	69.2	66.47	41.98	33.49	49.94	47.97	61.09	66.38	71.37	72.66	62.12	74.63	377	629	521	329	485	1131	919	922	948	992	766	727	564	646	775	1122	1153	986	963
LOC105222056	79.78	75.78	70.07	71.76	74.88	69.62	71.53	76.85	72.35	72.75	65.01	66.25	64.9	70.95	68.74	65.51	65.75	68.41	66.5	71.44	72.88	64.2	77.6	70.08	71.21	59.9	67.67	68.22	68.64	63.05	1619	2004	1554	879	1634	2215	2182	2224	1985	2025	1810	1840	1424	1627	1747	1951	2148	1743	1759
LOC105222057	50.08	48.05	44.34	42.12	42.12	48.11	49.02	45.97	51	47.63	44.83	46.07	46.39	46.6	43.74	50.27	47.22	48.67	46.02	47.06	49.42	40.12	48.53	46.28	44.3	46.12	44.71	46.54	49.05	45.94	2419	3025	2341	1228	2188	3644	3560	3167	3331	3156	2971	3046	2423	2544	2646	3564	3672	2952	2898
LOC105222058	31.07	34.84	32.5	35.68	35.52	39.15	35.95	37.13	34.95	39	32.74	33.22	30.89	36.47	36.96	34.53	33.23	33.32	31.57	36.21	36.94	36.1	27.85	34.39	35.54	33.6	35.83	38.39	39.62	28.61	453	662	518	314	557	895	788	772	689	780	655	663	487	601	675	739	780	610	600
LOC105222059	0.28	0.07	0.47	0.31	0.09	0.63	0.34	0.46	0.35	0.48	6.79	0.44	8.96	0.41	0.49	7.36	0.29	0.48	2.94	0.54	0.17	0.06	0.11	0.42	6.74	9.95	0.55	0.44	0.24	0.24	6	2	11	4	2	21	11	14	10	14	199	13	207	10	13	231	10	13	82
LOC105222060	10.85	8.84	8.16	8.59	9.53	7.15	8.98	9.2	8.96	9.56	8.64	9.25	9.64	8.33	9.77	10.08	10.91	10.43	11.53	10.55	7.64	10.22	9.11	10.68	9.87	9.83	10.64	6.57	8.71	9.31	454	482	373	217	429	469	565	549	507	549	496	530	436	394	512	619	735	548	629
LOC105222062	44.66	46.4	50.09	43.99	45.1	74.28	77.9	79.29	89.78	78.98	42.27	39.87	38.53	44.81	45.28	84.64	82.68	82.87	75.12	81.68	44.99	41.51	43.11	44.43	40.86	83.49	81.68	89.44	94.79	100.79	1208	1587	1498	713	1317	3245	3241	3180	3377	2996	1575	1469	1116	1370	1516	3408	3708	2897	2764
LOC105222063	0	0	0	0	0	0	0	0	0	0	0	0	0	0	0	0	0	0	0	0	0	0	0	0	0	0	0	0	0	0	0	0	0	0	0	0	0	0	0	0	0	0	0	0	0	0	0	0	0
LOC105222064	78.87	75.52	75.04	91.68	81.66	90.25	69	81.1	71.33	74.4	73.79	77.96	78.77	84.3	84.41	79.7	67.11	77.06	59.11	81.71	79.98	79.34	82.19	79.38	74.02	74.92	71.96	78.89	78.66	68.63	476	594	495	334	530	854	626	698	582	616	611	644	514	575	638	706	652	584	465
LOC105222065	11.58	12.18	9.66	16.85	10.62	10.28	9.05	10.53	7.29	9.81	11.57	9.72	13.31	10.04	11.8	6.56	6.41	9.9	9.48	6.59	14.51	10.46	11	12.16	13.45	7.65	6.69	9.43	9.08	7.24	148	203	135	130	146	206	174	192	126	172	203	170	184	145	189	123	132	159	158
LOC105222066	0.14	0.04	0.08	0.13	0.02	0.04	0.01	0.08	0.06	0	0.03	0.16	0.04	0.07	0.02	0.11	0.12	0.06	0.06	0.03	0	0.05	0.06	0.02	0.04	0.02	0.1	0.02	0.07	0.03	7	3	5	4	1	3	1	6	4	0	2	11	2	4	1	8	10	4	4
LOC105222067	0.09	0	0.32	0	0	0.03	0	0.09	0.06	0	0	0.09	0.48	0	0.17	0	0.48	0.07	0.33	0.03	0	0.05	0	0	0	0.1	0.07	0	0	0	2	0	8	0	0	1	0	3	2	0	0	3	12	0	5	0	18	2	10
LOC105222068	0.1	0	0	0.32	0	0.06	0	0	0	0	0	0.21	0	0	0.16	0	0	0	0.15	0.07	0	0	0	0.26	0	0	0	0	0	0	1	0	0	2	0	1	0	0	0	0	0	3	0	0	2	0	0	0	2
LOC105222070	228	234.92	265.98	318.47	497.49	304.83	223.68	193.5	308.47	320.91	635.42	600.8	540.9	297.08	725.68	345.65	139.18	118.59	210.31	231.21	432.71	298.14	306.33	505.86	330.68	285.85	455.85	271.17	232.06	136.05	2658	3569	3389	2241	6237	5572	3920	3217	4862	5132	10163	9586	6818	3914	10595	5914	2612	1736	3196
LOC105222071	4.02	7.15	6.1	13.47	11.05	4.95	5.65	2.24	6.56	6.06	21.51	12.82	11.49	6.23	15.1	9.4	2.84	1.02	5.4	3.92	11.41	9.48	7.09	14.46	13.67	10.98	9.13	5.62	5.14	4.73	44	102	73	89	130	85	93	35	97	91	323	192	136	77	207	151	50	14	77
LOC105222072	192.8	371.51	229.64	502.04	505.56	706.3	311.9	299.99	390.53	375.12	385.15	694.02	470.42	294.88	487.52	338.05	177.17	231.63	315.54	486.4	382.32	513.35	376.22	422.39	432.23	436.48	532.45	303.9	461.88	132.37	1882	4726	2450	2958	5307	10810	4577	4176	5154	5023	5158	9272	4965	3253	5960	4843	2784	2839	4015
LOC105222073	0.06	0.37	0.49	0.3	0.17	0.46	0.4	0.63	0.31	0.48	1.44	0.09	0.55	0.11	0.67	0.29	0.56	0.48	0.6	0.35	0	0.97	0.27	0.05	1.27	1.24	0.35	0.47	0.39	0.76	1	8	9	3	3	12	10	15	7	11	33	2	10	2	14	7	15	10	13
LOC105222074	0	0.02	0	0	0	0.02	0.02	0	0.07	0	0	0	0	0	0.02	0	0	0	0	0.02	0	0	0	0	0	0	0	0	0	0	0	1	0	0	0	1	1	0	3	0	0	0	0	0	1	0	0	0	0
LOC105222075	47	46.4	49.38	52.12	54.6	61.91	72.71	73.59	61.37	61.72	54.29	46.65	48.21	52.09	42.79	70.93	60.68	62	58.55	55.1	49.78	51.01	44.17	45.77	49.33	63.51	59.17	68.73	65.08	58.35	614	790	705	411	767	1268	1428	1371	1084	1106	973	834	681	769	700	1360	1276	1017	997
LOC105222076	121.82	128.43	118.63	119.49	114.84	125.21	129.64	134.55	131.85	133.44	120.92	120.33	115.19	129.11	118.94	132.12	130.14	120.36	125.95	115.94	134.25	110.1	113.74	115.17	113.55	124.78	124.62	132.28	133.39	133.89	3479	4780	3703	2060	3527	5607	5566	5480	5091	5228	4738	4704	3557	4167	4254	5538	5983	4316	4689
LOC105222077	47.33	49.42	55	49.91	51.98	68.27	58.87	59.57	58.53	64.71	62.85	49.65	57.15	49.94	52.22	67.69	66.16	61.42	69.13	64.81	49.5	50.22	47.21	47.81	54.58	71.42	59	60.48	59.8	56.42	707	962	898	450	835	1599	1322	1269	1182	1326	1288	1015	923	843	977	1484	1591	1152	1346
LOC105222078	165.44	178.2	168.37	174.89	163.96	177.01	177.76	186.94	186.44	187.96	187.47	159.67	160.53	182.11	160.58	195.17	167.35	157.08	169.72	152.71	178.16	151.04	145.52	156.6	157.89	166.59	173.42	206.16	191	181.6	3418	4798	3802	2181	3643	5734	5521	5508	5208	5327	5314	4515	3586	4252	4155	5918	5566	4075	4571
LOC105222079	0.05	0.16	0	0.09	0.2	0.2	0.18	0.22	0.08	0.04	6.77	0.12	5.35	0.14	0.17	9.11	0.13	0.08	3.09	0.04	0.38	0.13	0.06	0.09	5.16	9.53	0.09	0.29	0.16	0.03	1	4	0	1	4	6	5	6	2	1	175	3	109	3	4	252	4	2	76
LOC105222080	11.4	11.38	10.43	14.74	8.48	7.71	7.28	10.72	10.12	10.31	8.98	11.83	7.81	10.7	8.56	6.53	9.35	11.63	7	8.61	12.75	9.13	15.39	8.97	7.64	7.38	8.69	6.83	10.16	11.42	50	65	50	39	40	53	48	67	60	62	54	71	37	53	47	42	66	64	40
LOC105222081	2.25	1.96	2.2	1.58	2.49	2.02	2.29	1.34	2.51	2.06	1.67	1.87	2.58	1.79	2.32	2.06	2.11	2.37	2.02	1.94	2.22	1.81	1.98	2.46	2.82	2.18	2.07	1.69	1.67	1.71	59	67	63	25	70	83	90	50	89	74	60	67	73	53	76	79	89	78	69
LOC105222082	0	0	0.14	0	0	0.14	0	0	0	0.05	11.79	0.22	16.88	0.07	0.12	16.53	0.09	0	5.29	0.11	0	0	0	0	15.41	21.04	0.13	0.06	0.11	0	0	0	2	0	0	3	0	0	0	1	218	4	246	1	2	327	2	0	93
LOC105222083	0	0	0	0	0	0.02	0	0	0	0	0	0	0	0.04	0	0	0	0	0	0	0	0	0	0	0	0.02	0	0	0	0.01	0	0	0	0	0	1	0	0	0	0	0	0	0	2	0	0	0	0	0
LOC105222084	0	0	0	0	0	0	0	0	0	0	0	0	0	0	0	0	0	0	0	0	0	0	0	0	0	0	0	0	0	0	0	0	0	0	0	0	0	0	0	0	0	0	0	0	0	0	0	0	0
LOC105222085	0	0	0.06	0	0	0	0	0	0.05	0	0	0.02	0.16	0	0	0	0	0	0	0	0.12	0	0	0.09	0.04	0	0.63	0	0	0	0	0	2	0	0	0	0	0	2	0	0	1	5	0	0	0	0	0	0
LOC105222086	0	0	0	0	0	0.16	0	0	0	0	0	0	0	0	0	0	0	0	0	0	0	0	0	0	0	0	0	0.2	0	0	0	0	0	0	0	1	0	0	0	0	0	0	0	0	0	0	0	0	0
LOC105222087	0	0	0	0	0	0	0	0	0	0	0	0	0	0	0	0	0	0	0	0	0	0	0	0	0	0	0	0	0	0	0	0	0	0	0	0	0	0	0	0	0	0	0	0	0	0	0	0	0
LOC105222088	0	0.07	0	0	0	0.17	0	0.12	0	0	0	0	0	0	0	0	0	0	0	0	0	0	0	0	0	0	0	0.07	0	0	0	1	0	0	0	3	0	2	0	0	0	0	0	0	0	0	0	0	0
LOC105222089	0.11	0.24	0	0	0.2	0	0.21	0	0	0	0.15	0.15	0.1	0.19	0	0	0	0.17	0	0	0	0.26	0.24	0	0.12	0	0	0	0	0	1	3	0	0	2	0	3	0	0	0	2	2	1	2	0	0	0	2	0
LOC105222090	19.84	19.73	18.87	16.57	17.2	18.93	20	19.69	19.54	18.65	19.82	17.72	17.73	18.39	18.35	16.88	16.89	17.39	16.55	16.25	18.9	16.92	18.15	16.73	17.28	17.52	18.56	16.89	15.3	17.16	1138	1463	1179	570	1056	1699	1714	1599	1506	1459	1550	1380	1100	1187	1310	1416	1550	1251	1236
LOC105222091	0	0	0	0	0	0	0	0	0	0	0	0	0	0	0	0	0	0	0	0	0	0	0	0	0	0	0.21	0	0	0	0	0	0	0	0	0	0	0	0	0	0	0	0	0	0	0	0	0	0
LOC105222092	7.14	7.23	9.87	5.73	5.84	10.45	7.5	6.69	7.13	7.99	32.26	8.89	26.12	9.16	5.29	29.82	9.1	6.79	12.12	9.64	8.67	7.22	9.95	8.63	13.62	34.57	7.66	7.54	9.04	7.16	51	71	78	25	45	120	82	70	70	80	315	91	200	76	48	312	109	63	113
LOC105222093	9.82	9.62	9.01	8.34	10.84	8.02	9.27	7.33	9.13	7.73	10.59	12.52	10.72	8.29	11.48	7.46	8.04	7.19	7.97	8.9	11.37	10.41	8.44	10.56	11	7.66	8.79	6.61	8.19	6.18	310	396	311	159	368	397	440	330	390	335	459	541	366	296	454	346	409	285	328
LOC105222094	305.58	341.74	354.65	293.19	328.36	317.83	289.32	285.6	316.57	297.18	320.49	331.78	351.19	329.6	354.9	239.73	262.91	267.93	254.71	261.02	360.37	323.64	340.11	312.15	314.3	244.63	281.04	321.55	294.15	303.11	4101	5977	5202	2375	4739	6688	5837	5466	5744	5471	5901	6094	5096	4999	5965	4722	5680	4515	4456
LOC105222095	81.5	69.59	66.44	73.03	76.67	56.16	64.55	60.78	57.93	57.41	81.98	88.9	84.08	76.51	81.2	66.33	56.54	56.74	56.36	55.13	76.41	82.07	69.79	79.55	86.88	57.73	54.23	56.58	60.07	50.66	771	858	687	417	780	833	918	820	741	745	1064	1151	860	818	962	921	861	674	695
LOC105222096	3.44	4.26	2.95	3.87	3.71	2.99	3.43	2.43	3.05	3.17	4.79	4.57	3.56	3.58	4.26	3.46	2.1	3.2	3.38	3	3.37	3.34	4.56	3.45	3.25	2.84	3	3.44	3.29	3.02	87	141	82	59	101	119	131	88	103	110	167	159	98	103	135	129	86	102	112
LOC105222097	4.7	4.18	3.55	4.06	3.61	3.48	2.49	3.53	2.47	3.28	2.88	3.58	4.22	2.59	3.92	3.02	3.13	3.42	2.4	3.17	3.4	3.49	2.38	2.98	2.28	3.25	3.4	3.38	3.23	2.51	69	80	57	36	57	80	55	74	49	66	58	72	67	43	72	65	74	63	46
LOC105222098	4.67	4.75	5.44	4.02	4.26	3.13	2.6	3.71	4.22	3.81	4.22	5.77	5.47	4.22	4.35	4.41	4.62	4.64	5.78	4.85	4.39	4.36	4.55	5.58	4.82	4.09	3.75	3.5	3.24	5.28	269	357	343	140	264	283	225	305	329	301	334	455	341	275	314	373	429	336	434
LOC105222099	72.81	62.04	65.18	63.57	66.98	65.37	59.84	61.95	61.86	63.56	65	67.01	61.87	64.1	66.92	59.41	60.22	63.11	63.62	62.72	61.12	63.75	63.13	65.7	64.38	55.45	63.41	62.65	58.62	56.94	1575	1749	1541	830	1558	2217	1946	1911	1809	1886	1929	1984	1447	1567	1813	1886	2097	1714	1794
LOC105222100	0	0.08	0.03	0.06	0.03	0.32	0.1	0.2	0.08	0.18	0.05	0.13	0.03	0.13	0.11	0.32	0.16	0.11	0.06	0.08	0.09	0.05	0.08	0.06	0.12	0.14	0.09	0.06	0.13	0.04	0	3	1	1	1	14	4	8	3	7	2	5	1	4	4	13	7	4	2
LOC105222101	60.71	58.56	54.06	55.2	47.43	33.16	34.28	40.54	32.73	33.67	46.3	44.08	38.66	51.06	38.98	34.44	30.26	34.41	33.5	37.29	41.04	37.33	42.68	50.29	43.33	36.83	39.04	33.25	29	33.52	2283	2870	2222	1253	1918	1955	1938	2174	1664	1737	2389	2269	1572	2170	1836	1901	1832	1625	1642
LOC105222102	0	0	0	0	0	0	0	0	0	0	0.1	0	0.15	0	0	0.41	0.02	0.03	0.08	0.04	0.04	0.09	0	0	0.03	0.3	0	0.03	0	0.02	0	0	0	0	0	0	0	0	0	0	4	0	6	0	0	22	1	1	4
LOC105222103	0.06	0	0	0	0	0	0	0	0	0	0	0	0	0	0.05	0	0	0	0	0	0	0	0	0	0	0	0	0	0	0.04	1	0	0	0	0	0	0	0	0	0	0	0	0	0	1	0	0	0	0
LOC105222104	18.46	23.07	23.25	23.69	25.4	34.29	27.32	23.49	27.24	26.57	34.19	27.67	40.75	21.39	24.81	41.95	19.98	18.2	26.43	18.33	25.45	21.41	26.01	21.77	37.3	41.93	28.36	31.51	23.21	24.14	194	316	267	150	287	565	431	352	387	383	493	398	463	254	326	647	338	240	362
LOC105222105	2.97	1.91	2.8	3.58	3.14	2.16	1.03	1.77	2.56	2.29	2.32	3.24	2.37	2.6	2.86	2.53	2.23	1.27	3.41	3.05	1.55	2.95	3.07	3.97	2.46	2.64	2.14	1.83	1.37	2.23	73	61	75	53	83	83	38	62	85	77	78	109	63	72	88	91	88	39	109
LOC105222106	0	0.08	0	0	0	0.03	0.07	0	0	0.04	0.19	0.11	0.82	0.05	0	0.39	0.03	0.08	0.4	0.11	0	0	0	0.05	0.41	0.6	0.09	0.12	0.08	0	0	2	0	0	0	1	2	0	0	1	5	3	17	1	0	11	1	2	10
LOC105222107	9.05	10.22	10.97	15.49	11.38	10.61	10.67	10.14	10.39	10.37	13.61	10.14	13.53	10.32	9.69	11.59	9.81	12.31	12.2	12.82	8.97	8.99	10.58	11.95	12.17	14.21	8.2	9.96	9.06	10.23	169	250	228	178	229	316	305	274	269	270	342	262	272	220	232	315	297	291	301
LOC105222108	10.84	9.03	7.37	7.95	9.17	7.6	5.11	8.65	9.31	10.12	9.55	8.41	10.4	9.73	10.75	8.3	12.21	10.4	11.64	11.99	8.04	13.23	10.16	12.78	13.37	9.14	9.18	7.61	7.16	7.9	210	228	156	93	191	231	149	239	244	269	254	223	218	213	261	236	381	253	294
LOC105222109	14.34	13.16	15.07	16.7	16.13	18.17	18.44	16.04	16.49	15.05	14.2	13.52	14.61	13.46	14.7	15.19	17.28	16.98	16.06	17.67	16.13	14.66	13.08	14.46	8.66	17.17	17.72	19.56	20.6	16.39	148	177	170	104	179	294	286	236	230	213	201	191	163	157	190	230	287	220	216
LOC105222110	37.73	34.53	38.18	41.83	38.96	43.45	38	36.75	34.21	39.56	36.62	37.97	42.41	32.44	36.98	41.33	39.95	38.25	41.45	37.24	39.22	30.9	38.54	38.75	47.17	41.83	34.81	40.26	40.94	38.63	281.79	338.17	312.81	187.25	312.44	505.58	431.66	387.72	343.25	402.83	373.47	385.51	339.46	273.42	345.79	453.83	477.8	360.42	405.56
LOC105222111	2.78	2.91	1.45	1.63	3.22	2.62	2.03	2.22	1.96	2.31	2.74	2.83	2.72	2.6	2.41	1.94	2.16	2.5	1.89	2.24	2.67	1.91	2.42	2.16	1.98	3.08	2.24	2.17	2.02	2.06	95.21	129.83	54.19	33.75	118.56	140.42	104.34	108.28	90.75	108.17	128.53	132.49	100.54	100.58	103.21	97.17	119.2	107.58	84.44
LOC105222112	4.54	4.72	5.73	5.46	6.39	4.48	3.23	3.07	3.51	4.16	6.24	5.58	4.35	4.8	3.75	4.71	3.19	3.01	3.39	3.15	5.64	5.78	5.33	3.73	5.12	3.9	2.25	3.29	4.61	3.58	113	153	156	82	171	175	121	109	118	142	213	190	117	135	117	172	128	94	110
LOC105222113	1.34	2.14	1.69	2.95	2.65	1	0.22	0.38	0.2	0.32	2.51	2.93	3.82	2.55	2.42	0.65	0.81	0.43	0.82	0.43	2.4	3.64	2.44	4.01	3.09	0.85	0.48	0.33	0.11	0.39	45	94	62	60	96	53	11	18	9	15	116	135	139	97	102	32	44	18	36
LOC105222114	6.24	7.57	9.42	10.03	8.07	9.12	8.3	10.77	7.62	8.01	11.92	9.81	14.14	11.71	9.82	13.36	8.3	6.46	8.62	7.53	7.42	8.66	8.5	6.92	12.55	14.52	8.4	9.15	9.48	6.61	100	158	165	97	139	229	200	246	165	176	262	215	245	212	197	314	214	130	180
LOC105222115	8.06	7.82	7.52	9.31	8.56	8.13	8.27	7.81	7.23	6.98	7.58	8.7	8.66	10.5	9.18	6.84	6.3	6.59	7.22	5.48	8.84	7.55	9.71	8.7	9.24	6.97	6.83	7.01	8.25	6.26	155	196	158	108	177	245	239	214	188	184	200	229	180	228	221	193	195	159	181
LOC105222117	36.15	33.08	32.01	29.92	33.47	30.12	37.52	36.37	36.65	37.92	32.08	34.23	34.3	33.08	31.74	41.73	41.47	41.13	44.92	40.59	29.6	36.34	33.64	36.12	36.07	42.33	41.74	32.41	34.11	42.47	1465	1747	1418	732	1459	1914	2286	2102	2008	2108	1784	1899	1503	1515	1611	2482	2706	2093	2373
LOC105222118	4.91	4.62	3.51	4.6	4.5	4.35	5.31	3.92	3.74	3.71	5.63	4.49	3.97	5.85	4.21	2.88	2.71	3.36	3.79	3.43	4.55	3.66	3.98	3.81	4.27	3.28	3.6	3.61	3.22	3.55	136	166	106	76	133	189	220	155	140	141	214	169	119	183	146	117	121	117	137
LOC105222119	4.9	6.6	4.69	5.39	7.34	5.01	4.65	6.19	5.78	5.48	6.14	5.88	6.02	6.16	5.26	6.19	4.93	5.42	5.31	5.33	4.85	5.66	6.02	6.49	5.56	5.53	5.83	5.01	4.15	6.03	131	230	137	87	211	210	187	236	209	201	225	215	174	186	176	243	212	182	185
LOC105222120	0	0.03	0	0	0.11	0.05	0.05	0	0	0	0	0.06	0	0	0.06	0	0	0	0	0	0	0.05	0.09	0	0.31	0	0	0	0	0.02	0	1	0	0	3	2	2	0	0	0	0	2	0	0	2	0	0	0	0
LOC105222121	0.23	0.31	0.24	0.05	0.4	0.25	0.09	0.35	0.32	0.19	0.27	0.8	0.31	0.65	0.5	0.34	0.39	0.29	0.25	0.29	0.43	0.54	0.45	0.68	0.15	0.33	0.31	0.16	0.15	0.23	7	12	8	1	13	12	5	15	13	8	11	33	10	22	19	15	19	11	10
LOC105222122	0	0	0	0	0	0	0	0	0	0	0	0	0	0	0	0	0	0	0	0	0	0	0	0	0	0	0	0	0	0	0	0	0	0	0	0	0	0	0	0	0	0	0	0	0	0	0	0	0
LOC105222124	6.83	10.01	18.05	6.68	5.08	4.93	4.57	4.6	5.44	2.94	8.38	7.88	11.37	9.64	10.27	2.54	2.86	3.54	2.98	1.86	9.19	13.2	14.68	7.95	11.08	3.25	3.58	2.97	2.78	3.06	181	346	523	107	145	205	182	174	195	107	305	286	326	289	341	99	122	118	103
LOC105222125	4.43	3.54	3.16	2.06	6.1	5.77	3.13	4.41	4.92	4.98	4.52	3.89	5.17	2.12	5.24	3.38	4.79	3.74	3.95	3.93	5.38	5.54	3.89	2.85	5.35	4.1	3.08	5.52	2.46	4.18	50	52	39	14	74	102	53	71	75	77	70	60	63	27	74	56	87	53	58
LOC105222126	15.27	11.68	13.2	11.65	13	8.16	8.26	8.63	9.58	9.94	10.09	11.82	11.74	12.92	11.42	10.56	11.91	10.49	13.81	11.63	10.98	14.02	11.23	15.72	13.2	12.51	11.75	7.07	6.59	12.25	1016	1021	965	471	937	859	840	827	866	916	928	1082	850	981	955	1039	1290	877	1208
LOC105222127	2.54	2	2.02	2.02	1.89	2.4	2.48	1.86	1.53	1.98	1.9	1.93	1.16	2.04	1.62	1.59	1.79	2.19	1.64	1.77	2.1	1.95	2.29	2.43	2.2	1.54	1.69	0.88	2.11	1.52	75	77	65	36	60	111	110	78	61	80	77	78	37	68	60	69	85	81	63
LOC105222128	9.29	8.43	10.37	7.84	9.3	6.32	8.91	8.95	8.52	7.61	11	9.52	8.67	7.98	8.91	6.81	5.88	8.6	4.86	6.03	8.6	7.26	8.23	9.02	9.17	8.39	7.71	9.57	6.78	7.81	104	123	127	53	112	111	150	143	129	117	169	146	105	101	125	112	106	121	71
LOC105222129	0.06	0	0	0	0.23	0	0.04	0	0	0	0	0	0	0	0	0	0	0	0	0.23	0	0.08	0	0	0.07	0	0	0	0	0	1	0	0	0	4	0	1	0	0	0	0	0	0	0	0	0	0	0	0
LOC105222131	0	0.07	0	0	0.33	0	0.12	0	0	0	0.26	0	0.08	0.16	0	0	0.22	0.28	0.14	0.13	0.21	0.11	0	0	0.1	0.14	0	0	0.07	0	0	1	0	0	4	0	2	0	0	0	4	0	1	2	0	0	4	4	2
LOC105222132	7.07	2.8	3.3	3.1	3.18	5.23	3.71	5.94	4.19	5.16	2.8	3.32	3.03	3.56	2.77	3.1	4.86	4.85	4.24	6.43	4.4	3.45	5.32	3.6	3.24	3.21	3.77	3.91	5.37	4.93	151	78	77	40	73	175	119	181	121	151	82	97	70	86	74	97	167	130	118
LOC105222133	221.19	174.52	187.05	160.01	197.26	120.51	121.19	119.46	129.96	121.39	159.41	165.14	169.28	206.19	172.45	107.76	118.48	118.26	117.3	109.93	164.21	183.77	239.55	182.05	169.81	116.48	104.62	96.19	94.02	108.83	4713	4846	4356	2058	4520	4026	3882	3630	3744	3548	4660	4816	3900	4965	4602	3370	4064	3164	3258
LOC105222134	3.35	1.8	2.57	2.4	2.26	2.36	1.5	1.43	0.97	1.9	2.36	2.85	2.39	1.86	3.53	1.64	1.39	1.58	1.67	2.02	3.19	2.63	2.25	1.96	3.02	1.5	2.39	2	1.92	1.6	176	123	149	76	130	192	123	108	69	138	172	206	133	110	234	129	119	103	113
LOC105222135	1.13	0.85	1.08	0.61	1.92	1.15	1.87	0.56	1.46	0.58	1.31	1.65	1.09	1.07	1.24	1.62	1.39	1.44	1.22	1.24	1.26	0.47	1.19	1.14	0.71	2	1.03	1.72	1.08	1.4	21	21	22	7	39	34	53	15	37	15	34	42	22	22	29	45	42	34	30
LOC105222136	42.05	38.96	36.95	44.14	41.44	34.2	36.84	37.6	37.36	40.61	33.16	45.66	40.21	41.29	47.56	43.15	42.62	46.57	48.59	46	35.16	40.12	34.3	51.96	41.26	39.24	42.84	34.94	40.38	43.62	502	606	482	318	532	640	661	640	603	665	543	746	519	557	711	756	819	698	756
LOC105222137	80.84	87.44	83.51	85.75	96.09	93.23	83.05	81.61	84.52	75.68	86.17	111.71	93.95	75.31	91.58	79.04	70	77.88	81.07	87.7	72.04	93.41	104.73	91.9	99.88	79.71	103.2	82.88	87.11	70.33	1133	1599	1255	733	1419	1930	1653	1571	1537	1430	1610	2109	1408	1179	1569	1574	1540	1319	1420
LOC105222138	1033.68	971.65	1136.09	1139.46	1094.27	846.16	707.11	717.64	669.5	723.03	1012.5	1043.24	1070.87	1054.2	1169.68	630.24	638.59	656.61	616.5	643.93	994.37	1100.79	1024.83	990.97	1031.98	591.29	663.1	709.7	783.24	638.61	6942	8504	8339	4619	7903	8910	7139	6873	6079	6661	9329	9589	7776	8001	9838	6212	6904	5537	5397
LOC105222139	58.92	52.78	57.84	57.81	60.19	66.04	57.27	51.95	49.75	54.93	58.98	58.84	69.81	53.14	66.22	60.39	49.32	42.89	46.94	51.88	61.78	64.02	57.31	54.24	64.1	57.36	56.52	62.39	62.61	46.33	466	544	500	276	512	819	681	586	532	596	640	637	597	475	656	701	628	426	484
LOC105222140	289.45	267.06	284.53	249.68	259.55	213.25	226.8	223.2	226.18	206.4	258.12	247.77	253.14	265.03	262.04	211.12	213.2	212.33	200.62	188.11	297.98	238.42	305.27	249.07	244.21	200.58	216.44	227.15	226.18	213.03	6413	7711	6890	3339	6184	7408	7554	7052	6775	6273	7846	7513	6064	6636	7271	6865	7604	5907	5794
LOC105222141	13.21	8.35	11.5	13.17	12.89	10.33	8.36	12.51	10.12	10.27	13.55	13.29	12.55	9.62	11.63	11.99	10.03	9.87	10.59	11.55	11.82	11.7	11.71	13.07	12.8	10.45	8.61	11.43	10.12	9.08	226	186	215	136	237	277	215	305	234	241	318	311	232	186	249	301	276	212	236
LOC105222142	1.62	1.73	1.98	2.19	1.73	2.16	1.73	1.69	1.31	1.22	2	1.94	1.68	1.04	1.53	1.77	1.68	1.21	0.94	2.1	1.22	2.09	1.66	1.49	2.08	1.29	1.58	1.74	1.76	1.81	33	46	44	27	38	69	53	49	36	34	56	54	37	24	39	53	55	31	25
LOC105222143	1.01	2.31	1.86	1.28	3.93	9.01	6.72	8.17	6.07	6.3	3.52	4.63	3.53	2.91	4.28	7	4.03	5.14	7.63	11.77	2.61	6.29	2.74	4.21	3.85	8.38	14.06	4.93	12.31	4.02	25	74	50	19	104	348	249	287	202	213	119	156	94	81	132	253	160	159	245
LOC105222144	0.17	0	0.08	0	0.08	0	0.03	0.06	0.03	0	0.47	0	0.24	0	0	0.12	0.27	0	0.07	0.09	0.05	0.05	0	0	0.38	0.26	0.04	0	0.12	0.05	4	0	2	0	2	0	1	2	1	0	15	0	6	0	0	4	10	0	2
LOC105222147	0.81	0.59	2.23	1.06	1.67	1.97	0.68	0.9	1.04	1.59	1.31	1.44	0.71	0.83	0.82	1.49	1.14	1.88	1.35	1.55	0.56	1.77	1.97	1.11	1.15	1.15	2.65	1.18	1.16	1.35	19	18	57	15	42	72	24	30	33	51	42	46	18	22	24	51	43	55	41
LOC105222148	0	0	0	0	0	0	0.21	0.15	0	0	0	0	0	0	0	0.28	0.13	0.08	0	0.08	0	0	0	0	0	0	0	0	0	0	0	0	0	0	0	0	3	2	0	0	0	0	0	0	0	4	2	1	0
LOC105222149	3.75	3.87	3.04	3.28	3.98	2.02	1.7	3	3.85	3.58	3.27	2.47	3.05	4.09	3.37	4.17	3.87	3.76	4.33	5.21	3.14	4.59	3.68	4.13	3.15	3.33	3.46	2.77	2.41	4.68	142	191	126	75	162	120	97	162	197	186	170	128	125	175	160	232	236	179	214
LOC105222150	0.35	0.32	0.32	0.47	0.65	0.18	0.56	0.54	0.21	0.26	37.17	0.05	39.57	0.75	0.11	32.69	0.39	0.39	12.45	0.46	0.08	0.26	0	0.06	31.38	44.54	0.42	0.33	0.26	0.24	5	6	5	4	10	4	12	11	4	5	726	1	609	12	2	683	9	7	231
LOC105222151	108.25	64.35	72.55	101.96	72.41	70.81	86.64	95.24	67.96	78.5	91.74	64.04	72.29	80.9	62.66	67.34	68.66	82.46	75.58	80.44	83.55	69.28	75.88	89.33	82.78	69.74	76.01	66.53	61.38	67.26	3036	2352	2224	1726	2184	3114	3653	3809	2577	3020	3530	2458	2192	2564	2201	2772	3100	2904	2763
LOC105222152	53.84	53.13	57.04	59.8	50.86	50.92	52.91	52.94	54.8	55.54	58.74	50.04	56.87	55.3	60.4	56.24	53.63	66.13	56.69	55.56	42.85	41.63	49.2	51.43	55.33	55.53	53.97	57.23	60.32	58.39	1077	1385	1247	722	1094	1597	1591	1510	1482	1524	1612	1370	1230	1250	1513	1651	1727	1661	1478
LOC105222153	0	0.05	0.12	0	0	0.13	0.18	0.47	0.25	0.15	0.34	0.29	0.68	0.06	0.05	0.37	0.58	0.05	0.15	0.2	0	0.34	0.15	0.06	1.28	1.09	0.23	0.05	0.05	0.39	0	1	2	0	0	3	4	10	5	3	7	6	11	1	1	8	14	1	3
LOC105222154	10.35	12.55	10.01	8.57	10.34	9.71	12.19	8.3	12.1	11.06	7.2	8.82	9.08	9.58	11.3	9.81	8.09	10.42	9.49	11.02	10.96	9.59	9.43	11.11	7.51	8.02	11.08	10.55	9.17	10.51	174	275	184	87	187	256	308	199	275	255	166	203	165	182	238	242	219	220	208
LOC105222155	25.31	35.83	42.97	31	38.84	25.92	23.6	26.82	27.65	27.94	34.33	31.84	31.77	27.84	33.6	26.7	30.55	40.1	28.85	27.74	33.91	29.5	37.12	31.84	30.34	27.37	31.92	32.68	29.52	37.29	560	1033	1039	414	924	899	785	846	827	848	1042	964	760	696	931	867	1088	1114	832
LOC105222156	6.46	4.34	3.97	5.93	6.33	4.63	4.23	4.56	4.66	5.15	4.82	5.12	4.81	5.31	5.56	5.43	4.67	6.19	6.39	5.06	3.24	7.25	6.24	7.03	6.59	5.09	4.48	5.25	4.35	4.99	128	112	86	71	135	144	126	129	125	140	131	139	103	119	138	158	149	154	165
LOC105222157	30.87	20.71	18.99	20.59	22.05	16.4	17.6	21.7	18.2	16.8	17.66	18.55	18.15	22.12	19.33	15.69	17.76	18.18	18.53	19.59	18.44	20.53	18.16	23.82	22.71	19.45	15.47	13.1	13.13	16.64	1252	1095	842	504	962	1043	1073	1255	998	935	983	1030	796	1014	982	934	1160	926	980
LOC105222158	1.14	1.2	1.17	1.1	1.74	1.31	0.58	0.94	0.74	1.2	0.88	1.17	1.12	1.35	1.98	1	0.88	0.78	1.09	0.95	1.58	1.26	1.19	1.25	1.43	1.08	1.39	0.96	0.69	0.76	50	68	56	29	82	90	38	59	44	72	53	70	53	67	108	64	62	43	62
LOC105222159	18.87	18.64	17.45	17.22	16.03	14.99	16.19	17.58	15.97	16.17	18.36	18.88	18.83	16.92	20.3	16.63	17.13	19.43	16.66	17.17	14.68	16.93	16.9	21.54	19.37	17.26	14.91	16.61	14.67	15.76	601	778	607	342	560	759	782	806	692	710	807	833	649	606	817	785	883	779	699
LOC105222160	5.43	5.32	6.21	4.38	7.11	4.65	5.04	5.56	4.76	4.74	8.13	4.18	10.18	5.5	3.71	9.3	3.91	3.53	5.54	4.83	6.2	4.83	5.39	4.66	7.26	6.99	3.63	5.8	3.81	3.04	76	97	95	37	107	102	106	111	90	91	156	80	154	87	65	191	88	62	101
LOC105222161	34.04	28.06	26.32	29.67	39.41	17.83	15.16	20.09	22.43	21.72	33.12	34.33	33.13	33.18	34.31	24.61	22.89	24.01	26.53	26.3	25.51	41.83	36.24	44.01	33.72	25.59	26.39	16.62	19.2	21.63	1458	1566	1232	767	1815	1197	976	1227	1299	1276	1946	2012	1534	1606	1840	1547	1578	1291	1481
LOC105222162	3061.74	3221.03	3390.98	3334.06	3314.17	2695.48	2592.93	2640.16	2641.53	2610.79	3355.53	3423.79	3304.52	3188.52	3451.77	2207.58	2321.14	2342.9	2246.48	2331.52	3567.05	3158.46	3379.34	3021.21	3031.23	2192.69	2407.66	2617.85	2644.79	2467.01	101581	139268	122962	66768	118246	140219	129325	124915	118489	118822	152737	155468	118542	119552	143425	107495	123972	97603	97156
LOC105222163	1.16	2.12	1.5	1.23	1.97	1.64	1.95	1.69	2.55	1.81	1.36	1.43	1.1	1.96	1.1	3.18	2.74	3.25	2.84	1.68	1.76	0.8	0.83	1.35	2.3	2.92	2.32	1.42	2.3	4.5	36	86	51	23	66	80	91	75	107	77	58	61	37	69	43	145	137	127	115
LOC105222164	0.2	0.06	0.22	0.07	0.29	0.08	0.05	0.33	0.12	0.12	17.48	0.26	17.19	0.18	0.13	15.07	0.22	0.28	4.2	0.26	0.19	0	0.09	0.04	12.57	20.27	0	0.03	0.06	0.14	5	2	6	1	8	3	2	12	4	4	605	9	469	5	4	558	9	9	138
LOC105222165	1.52	2.38	1.33	1.4	1.57	1.32	2.28	1.52	1.83	1.86	1.73	1.98	2.19	1.95	1.78	2.32	2.16	2.8	3.08	2.47	1.8	2.01	2.16	3.13	2.66	2.22	2.27	1.4	1.48	3.48	123.82	252.48	118	69	137.4	168.6	278.71	176	201.81	207.61	193	220.66	192.36	179.37	181.53	277.12	283.05	286.29	327.24
LOC105222166	0.14	0.11	0.31	0.32	0.23	0.11	0	0.06	0.17	0.06	0.25	0.16	0.18	0.32	0.34	0.11	0.16	0.09	0.13	0.12	0.27	0.14	0.16	0.18	0.44	0.11	0.12	0.07	0.04	0.1	5	5	12	7	9	6	0	3	8	3	12	8	7	13	15	6	9	4	6
LOC105222167	21.9	25.86	20.41	26.19	24.34	26.16	32.13	24.93	32.79	25.68	26.52	29.77	26.12	21.75	22.66	32.26	34.2	31.86	35.21	34.12	28.95	23.77	22.83	32	23.83	33.98	36.29	29.02	27.36	44.06	310	476	314	225	370	577	680	498	625	500	517	576	399	348	404	662	774	563	645
LOC105222168	2.68	1.9	3.56	1.71	2.82	1.73	0.9	1.47	0.76	1.63	1.53	1.18	1.5	0.86	2.24	0.88	1.5	2.16	1.65	1.14	1.58	1	1.59	0.74	1.78	1.11	1.2	1.28	0.99	0.85	91	84	132	35	103	92	46	71	35	76	71	55	55	33	95	44	82	92	73
LOC105222169	73.67	67.23	66.95	76.32	71.75	69.33	60.67	77.01	88.59	77.1	59.48	64.18	59	70.1	61.88	72.53	88.44	82.64	88.39	86.74	60.59	65.16	64.56	63.97	61.96	70.5	72.88	69.01	61.67	87.74	1924	2288	1911	1203	2015	2839	2382	2868	3128	2762	2131	2294	1666	2069	2024	2780	3718	2710	3009
LOC105222170	0	0	0	0	0	0	0	0	0	0	0	0	0	0	0	0	0	0	0	0	0	0	0	0	0	0	0	0	0	0	0	0	0	0	0	0	0	0	0	0	0	0	0	0	0	0	0	0	0
LOC105222171	0	0	0	0	0	0	0	0	0	0	0	0	0	0	0	0	0	0	0	0	0	0	0	0	0	0	0	0	0	0	0	0	0	0	0	0	0	0	0	0	0	0	0	0	0	0	0	0	0
LOC105222172	28.59	25.54	17.93	20.87	23.22	19	22.32	26.9	25.37	24.54	13.51	18.08	16.95	20.9	16.35	23.43	25.49	36.46	33.6	30.28	16.1	19.55	18.54	29.84	20.33	22.28	24.98	19.11	16.85	25.47	1911	2225	1310	842	1669	1991	2243	2564	2293	2250	1239	1654	1225	1579	1369	2299	2743	3060	2928
LOC105222173	0	0	0	0.04	0.02	0	0	0.04	0.03	0	0.02	0	0	0	0	0.06	0	0.03	0	0	0	0	0	0.06	0	0.03	0	0	0	0	0	0	0	1	1	0	0	3	2	0	1	0	0	0	0	4	0	2	0
LOC105222174	64.54	58.92	71.28	60.6	62.86	79.85	92.51	105.5	101.43	104.14	59.83	65.16	64.45	58.19	60.41	96.88	105.09	99.34	103.83	97.79	57.62	69.4	65.59	66.67	65.92	98.29	97.14	92.46	103.29	103.43	1265	1505	1527	717	1325	2454	2726	2949	2688	2800	1609	1748	1366	1289	1483	2787	3316	2445	2653
LOC105222175	0.71	0.81	3.12	0.97	1.2	1.05	0.78	1.24	0.78	1.46	0.94	0.26	0.33	0.62	0.94	1.36	0.58	0.84	0.81	0.77	2.38	1.03	0.79	0.53	0.92	0.63	1.1	1.21	1.2	0.61	6	9	29	5	11	14	10	15	9	17	11	3	3	6	10	17	8	9	9
LOC105222176	33.32	35.28	32.88	33.27	33.91	31.97	39.52	34.91	37.61	35.18	34.21	35.04	31.02	38.7	30.34	31.12	33.48	32.68	31.86	33.45	32.01	34.04	36.53	32.9	29.86	29.47	33.78	36.01	34.3	35.97	876	1209	945	528	959	1318	1562	1309	1337	1269	1234	1261	882	1150	999	1201	1417	1079	1092
LOC105222177	0	0	0	0.06	0	0	0	0.05	0.06	0	0	0	0	0	0	0.03	0	0.03	0	0.03	0.05	0	0	0.03	0	0	0	0.06	0.03	0	0	0	0	1	0	0	0	2	2	0	0	0	0	0	0	1	0	1	0
LOC105222178	5.69	4.65	4.39	5.27	5.75	4.26	2.33	4.62	4.71	4.48	4.26	4.92	4.33	5.99	5.17	5.04	6.05	6.43	7.39	6.89	3.83	6.07	5.16	7.2	7.33	4.69	6.02	4.04	3.01	5.76	806	858	679	450	876	946	495	932	901	870	828	954	662	958	916	1047	1379	1143	1364
LOC105222179	15.1	12.35	11.25	11.51	11.85	8.63	9.7	11.68	11.58	11.29	12.51	12.37	12.51	12.23	11.08	12.65	12.95	12.87	14.03	12.44	11.17	13.58	12.93	14.6	14.37	12.26	11.85	8.81	9.42	11.36	854	908	696	392	721	763	826	942	887	877	975	955	767	780	784	1051	1179	911	1034
LOC105222180	0.42	0.49	0.51	0.47	0.52	0.72	0.42	0.49	0.78	0.51	0.41	0.77	0.19	0.12	0.39	0.62	0.87	0.78	0.59	0.71	0.42	1.23	0.55	0.57	0.55	0.92	0.59	0.44	0.36	0.85	6	9	8	4	8	16	9	10	15	10	8	15	3	2	7	13	20	14	11
LOC105222181	17.34	16.03	16.08	13.07	14.89	14.64	13.66	14.76	14.04	15.07	14.5	15.77	14.79	17.36	15.52	14.12	14.82	15.63	16.27	16.97	13.57	14.67	16.65	16.65	16.98	15.05	15.82	14.45	13.37	15.1	644	776	653	293	595	853	763	782	705	768	739	802	594	729	722	770	886	729	788
LOC105222182	9.93	8.38	9.4	9.22	9.87	6.07	7.52	8.88	8.08	9.16	9.43	9	11.55	8.7	8.39	10.3	8.91	10.68	10	8.58	7.95	9.86	10.21	12.42	11.89	10.23	8.24	8.07	7.21	7.99	291	320	301	163	311	279	331	371	320	368	379	361	366	288	308	443	420	393	382
LOC105222183	327.73	336.5	346.7	329.22	331.51	389.63	425.68	409.62	366.88	381.1	304.75	294.96	295.88	319	294.37	337.23	349.24	337.18	323.29	322.02	355.49	316.73	323.79	303.58	334.14	342.77	317.09	355.44	342.05	296.79	6709	8977	7757	4068	7298	12506	13100	11958	10154	10702	8559	8264	6549	7380	7547	10132	11509	8667	8627
LOC105222184	52.57	47.38	49.07	60.82	43.05	32.92	31.72	30.31	24.6	29.46	56.21	48.6	69.79	47.36	51.21	27.86	21.99	24.49	23.23	32.03	45.92	65.9	55.78	39.96	52.98	31.01	26.64	30.35	29.25	17.83	441	518	449	308	388	433	400	360	279	339	647	558	633	449	538	343	297	258	254
LOC105222185	284.58	291.93	289.21	326.25	321.13	304.57	287.59	280.74	285.65	277.34	293.12	332.44	328.91	294.4	336.93	251.37	259.77	261.28	264.13	269.4	327.12	351.67	344.19	311.7	309.48	258.9	261.38	276.04	294.89	246.28	3016	4032	3350	2087	3660	5061	4582	4243	4093	4032	4262	4822	3769	3526	4472	3910	4432	3477	3649
LOC105222186	111.99	116.14	119.5	118.15	120.7	132.62	130.71	124.43	121.92	126.36	108.13	110.64	105.95	104.87	113.71	118.81	121.84	118.03	112.9	134.21	114.24	113.17	105.19	107.7	104.85	116.93	123.42	132.89	136.29	127.51	1528	2065	1782	973	1771	2837	2681	2421	2249	2365	2024	2066	1563	1617	1943	2379	2676	2022	2008
LOC105222187	0	0	0	0	0	0	0	0	0	0	0	0	0	0.03	0.05	0	0	0	0	0	0	0	0	0	0	0	0	0	0	0	0	0	0	0	0	0	0	0	0	0	0	0	0	1	2	0	0	0	0
LOC105222188	2.34	2.09	1.69	2.17	1.97	2.78	3.66	3.32	3.58	3.81	1.91	3.02	3.42	2.99	2.7	3.3	3.65	3.6	2.51	2.65	2.72	2.59	3.12	2.63	2.37	3.27	4.66	2.53	4.93	2.98	43	50	34	24	39	80	101	87	89	96	48	76	68	62	62	89	108	83	60
LOC105222189	8.2	9.04	8.73	10.82	8.15	11.6	13.4	9.94	10.77	13.39	7.24	8.69	8.1	7.46	7.53	11.52	11.44	11.42	13.44	11.63	6.04	9	8.48	8.88	8.35	10.53	11.53	11.53	12.43	14.06	147	211	171	117	157	326	361	254	261	329	178	213	157	151	169	303	330	257	314
LOC105222190	0.8	0	0.24	0	0	0	0.18	0.19	0.59	0	0.58	1.55	0.25	0	0.42	0	0.66	0.63	0.2	0	0.32	0.33	0	0.47	0.3	0.2	0	0.42	0.58	0	3	0	1	0	0	0	1	1	3	0	3	8	1	0	2	0	4	3	1
LOC105222191	27.37	23.72	24.33	24.44	24.83	20.16	24.29	22.13	23.82	23.97	24.18	25.58	31.56	24.57	23.91	22.81	23	24.64	24.09	24.17	27.03	30.24	29.08	27.28	23.74	20.82	22.33	21.45	22.99	22.21	637	719	618	343	621	734	849	733	749	764	772	814	794	646	696	778	860	720	729
LOC105222192	16.14	16.6	16.14	14.34	16.76	13.51	13.89	13.29	15.65	13.5	14.83	13.71	15.15	12.64	16.11	14.88	13.87	12.22	14	16.33	11.6	21	14.83	19.07	17.43	12.54	15.11	12.79	12.38	12.93	303	409	332	164	340	397	395	362	401	341	379	345	309	268	384	410	424	292	345
LOC105222193	14.85	14.43	14.72	13.2	15.6	14.55	14.22	15.48	14.75	13.21	13.93	14.21	14.01	12.53	15.1	14.27	14.73	13.52	13.14	15.17	14.77	14.98	14.92	12.56	14.15	15.29	13.62	14.24	14.68	13.61	300	380	325	161	339	461	432	446	403	366	386	393	306	286	382	423	479	343	346
LOC105222194	0.83	0.97	0.69	0.4	0.42	1.06	0.93	0.68	1.41	1.25	0.7	0.59	0.82	0.5	0.64	0.55	0.8	0.94	1.05	0.72	0.41	0.54	0.6	0.72	0.36	0.82	1.2	0.78	0.8	0.91	31	47	28	9	17	62	52	36	71	64	36	30	33	21	30	30	48	44	51
LOC105222195	4.94	3.03	3.02	4.09	3.37	4.31	5.59	2.66	3.66	3.24	3.48	3.73	3.05	2.19	4.47	2.13	2.56	3.15	3.67	3.35	5.09	2.68	2.41	1.47	4.23	2.16	1.53	3.51	2.17	2.46	30	24	20	15	22	41	51	23	30	27	29	31	20	15	34	19	25	24	29
LOC105222196	448.23	441.15	419.23	442.4	427.82	362.58	391.06	378.57	375.1	354.91	405.51	406.79	382.74	422.85	394.69	352.49	347.03	340.4	335.21	320.86	450.5	347.21	399.95	382.21	362.63	329.83	343.3	377.19	399.97	390.24	10097	12954	10321	6018	10373	12820	13255	12164	11434	10980	12538	12541	9330	10766	11134	11668	12587	9634	9856
LOC105222197	55.19	66.19	71.56	68.46	71.04	64.25	70.81	61.71	63.7	79.2	60.32	64.85	67.63	59.71	64.89	60.01	76.17	66.73	66.17	65.49	65.33	54.11	77.48	59.46	60.37	64.91	67.58	62.02	55.24	67.52	2094	3199	2829	1498	2785	3687	3851	3159	3117	3837	3055	3289	2665	2451	2961	3220	4446	3005	3185
LOC105222198	5.61	5.3	4.71	5.5	5.53	4.18	3.58	4.55	4.6	4.62	4.31	5.08	5.32	5.51	5.21	4.97	5.86	5.54	5.95	5.91	3.66	7	4.73	7.44	6.85	5.7	5.89	3.69	3.61	4.9	603	743	554	357	639	704	578	698	669	682	636	748	618	669	702	784	1014	748	834
LOC105222199	30.97	31.6	36.51	41.65	33.55	43.11	35.51	32.07	33.96	32.81	26.69	29.55	29.83	35.79	36.66	29.79	29.09	30.18	32.71	32.16	30.11	37.36	29.1	35.83	33.16	25.4	34.71	32.46	38.86	28.3	170	226	219	138	198	371	293	251	252	247	201	222	177	222	252	240	257	208	234
LOC105222200	6.67	5.87	6.35	5.61	5.64	5.31	6.83	6.31	5.29	4.96	6.28	6.59	7.4	5.86	5.84	4.99	5.71	4.92	5.96	4.9	6.75	6.46	6.31	6.43	7.3	4.75	5.02	5.06	6.54	4.83	244.43	280.46	254.25	124.07	222.23	305.06	376.06	329.67	262.05	249.41	315.73	330.47	293.11	242.52	268.18	268.52	336.55	226.21	284.74
LOC105222201	22.67	19.48	19.74	19.17	20.43	17.11	17.16	19.81	17.61	18.63	20.51	20.08	22	19.04	19.46	20.12	17.52	17.49	19.27	20.21	18.7	23.05	20.91	22.53	21.12	20.55	19.11	15.45	14.93	16.33	834.57	922.54	791.75	426.93	809.77	977.94	928.94	1042.33	845.95	925.59	1055.27	1002.53	852.89	766.48	893.82	1080.48	1033.45	796.79	898.26
LOC105222202	50.89	50.08	41.83	52.5	61.61	71.53	53.27	57.74	66.27	59.07	49.57	73.51	62.31	48.07	63.53	75.7	57.76	65.08	84.64	96.7	43.12	75.2	52.37	69.21	80.6	77.73	96.24	51.69	70.41	53.26	2176	2791	1955	1355	2833	4796	3424	3521	3831	3465	2908	4302	2881	2323	3402	4751	3976	3494	4718
LOC105222204	0.01	0	0.01	0	0.01	0.01	0.01	0	0.02	0.02	0.44	0	0.24	0	0	0.72	0.01	0.04	0.32	0.05	0	0	0	0	0.53	1.07	0	0.01	0.02	0.01	1	0	1	0	1	1	2	0	2	3	58	0	25	0	0	101	1	5	40
LOC105222205	0	0.1	0	0	0	0.03	0.03	0.03	0.1	0.07	0.43	0	0.55	0.08	0	0.53	0.11	0	0.21	0.1	0	0.06	0.2	0.08	0.51	1.08	0.08	0.07	0.1	0.05	0	3	0	0	0	1	1	1	3	2	13	0	13	2	0	17	4	0	6
LOC105222206	0.05	0	0	0	0	0	0.11	0	0.04	0	0	0	0	0	0	0	0.07	0.04	0	0	0	0	0	0.05	0	0	0	0	0.04	0.06	1	0	0	0	0	0	3	0	1	0	0	0	0	0	0	0	2	1	0
LOC105222207	1.83	1.59	1.94	2.15	1.78	0.71	0.64	0.88	0.71	0.83	1.5	1.92	2.59	2.37	2.11	0.77	1.09	1.1	0.98	1.09	2.34	2.7	3.68	1.96	1.85	1.07	1.17	0.75	0.69	0.98	134	152	155	95	140	81	70	92	70	83	150	192	205	196	193	83	128	101	93
LOC105222208	0.31	0.36	0.19	0.18	0.55	0.07	0.36	0.92	0.34	0.33	0	0.06	0.1	0.19	0.08	0.37	0.48	0.42	0.32	0.85	0.46	0.26	0.36	0.38	0.24	0.27	0.47	0.12	0.08	0.37	4	6	2	1	7	1	7	16	5	5	0	1	1	2	1	7	10	5	4
LOC105222209	79.98	78.66	75.45	85.33	81.51	95.49	88.01	80.22	80.4	90.26	74	82.74	83.82	80.93	86.4	80.48	73.99	77.44	75.73	91.84	74.09	88.75	80.59	74.29	79.73	74.52	88.75	88.56	87.11	71.94	969	1242	999	624	1062	1814	1603	1386	1317	1500	1230	1372	1098	1108	1311	1431	1443	1178	1196
LOC105222210	17.67	18.63	19.81	17.43	21.39	23.57	25.3	23.79	21.65	20.6	17.5	18.78	20.96	20.59	17.4	17.88	20.66	24.49	21.27	19.15	18.68	18.13	19.27	18.93	15.14	20.78	23.64	24.62	21.92	22.04	262	360	321	156	341	548	564	503	434	419	356	381	336	345	323	389	493	456	411
LOC105222211	58.66	53.24	49.79	50.89	49.5	59.45	51.26	47.91	53.28	60.91	53.95	49.44	57.92	59.75	53.07	55.48	45.57	48.08	42.76	58.66	57.3	56.62	51.38	45.09	50.13	49.88	49.1	54.07	50.38	48.29	443	524	411	232	402	704	582	516	544	631	559	511	473	510	502	615	554	456	421
LOC105222212	103.91	88.66	97.81	94.82	94.48	95.26	90.03	90.96	97.12	95.98	95.72	91.13	92.65	95.2	83.44	114.52	129.71	93.53	112.69	102.63	85.09	105.27	87.29	96.39	90.11	120.4	97.96	114.66	103.72	106.8	4377	4867	4503	2411	4280	6292	5701	5464	5531	5546	5532	5254	4220	4532	4402	7080	8796	4947	6188
LOC105222213	1.55	1.53	1.74	1.82	1.59	0.76	0.84	1.15	1.15	0.88	9.95	1.72	10.74	1.68	1.19	9.34	1.68	1	4.14	1.23	0.87	1.17	1.34	1.23	9.11	14.65	1.49	0.7	0.9	1.51	68	87	83	48	75	52	55	72	68	53	597	103	508	83	65	600	118	55	236
LOC105222214	6.97	8.09	8.14	7.06	8.14	6.35	7.2	6.75	7.09	6.38	7.69	7.34	7.8	8.24	6.92	5.84	6.35	6.32	6.93	7.26	7.74	7.51	8.77	8.24	8.3	6.18	6.44	6.29	5.83	6.04	152	230	194	93	191	217	236	210	209	191	230	219	184	203	189	187	223	173	197
LOC105222215	27.95	35.85	53.02	38.22	39.31	26.45	22.14	20.67	14.88	18.9	60.69	44.65	55.21	41.59	57.83	21.17	22.51	30.61	23.44	19.81	43	31.22	58.9	32.03	58.14	18.17	22.08	24.16	14.18	22.71	911	1523	1889	752	1378	1352	1085	961	656	845	2714	1992	1946	1532	2361	1013	1181	1253	996
LOC105222216	2.36	2.6	1.75	1.91	1.73	3	3.43	3.3	3	3.1	2.17	2.31	1.63	2.14	1.59	4.04	3.86	4.75	3.96	3.26	2.31	2.47	1.89	2.47	2.02	3.27	3.17	3.03	2.9	3.7	143	206	116	70	113	285	313	286	246	258	181	192	107	147	121	360	377	362	313
LOC105222217	0	0	0	0	0	0.07	0	0	0	0	0	0	0	0	0	0	0	0	0	0	0	0	0	0	0.12	0.09	0	0	0	0	0	0	0	0	0	1	0	0	0	0	0	0	0	0	0	0	0	0	0
LOC105222218	13.04	12.16	12.91	11.43	12.62	10.59	15.55	13.74	13.47	12.42	14.1	13.14	13.63	14.24	12.07	12.45	10.68	11.61	11.14	12.15	15.54	12.92	12.51	12.58	15.27	12.5	11.68	12.64	12.24	12.29	414	503	448	219	431	527	742	622	578	541	614	571	468	511	480	580	546	463	461
LOC105222219	5.52	4.54	5	5.25	5.33	3.42	2.52	4.48	4	3.7	4.87	5.89	5.66	4.85	4.79	3.84	4.29	3.9	5.03	4.78	3.78	6.76	5.05	5.82	6.09	3.45	5.1	3.55	2.63	3.86	195	208	196	114	203	187	133	221	196	187	240	285	217	192	217	201	250	172	236
LOC105222220	30.85	28.95	24.27	27.34	25.99	26.3	33.41	31.12	29.63	27.71	27.07	23.95	27.12	24.68	20.65	29.88	29.15	25.31	28.56	24.92	28.94	23.55	21.84	24.82	25.33	26.68	30.57	29.92	25.87	27.3	732	895	629	392	663	979	1192	1053	951	902	882	778	696	662	614	1041	1114	754	883
LOC105222221	8.98	8.2	7.74	8.07	9.58	8.59	9.21	7.89	9.3	9	10.89	10.74	10.19	8.95	8.49	10.4	9.99	10.92	8.49	9.1	8.54	12.06	8.46	10.86	9.45	9.21	8.93	7.42	9.25	7.97	190	226	179	103	218	285	293	238	266	261	316	311	233	214	225	323	340	290	234
LOC105222222	25.41	34.04	23.3	29.68	35.08	25.11	18.45	23.88	21.69	22.34	33.02	41.58	36.49	25.1	35.01	22.08	16.63	16.13	20.8	22.76	33.4	37.36	32.93	31	38.21	24.05	28.57	18.21	19.62	15.3	926	1617	928	653	1375	1435	1011	1241	1069	1117	1651	2074	1438	1034	1598	1181	976	738	988
LOC105222224	13.8	14.21	11.86	13.95	14.8	13.08	15.06	16.15	15.18	15.18	14.75	11.9	13.93	13.81	11.37	13.94	14.02	15.68	14.75	15.41	13.08	12.46	14.3	12.13	12.96	13.81	14.13	14.96	13.54	14.5	486	653	454	289	554	717	791	803	713	728	703	576	524	546	496	717	788	689	671
LOC105222225	13.58	9.52	20.8	16.04	9.6	11.46	10.92	9.86	10.64	10.49	8.15	12.27	15.78	12.16	11.45	8.31	9.04	11.97	9.07	9.36	9.47	20.19	18.83	7.36	10.63	7.99	7.02	9.11	9.26	11.35	254	232	425	181	193	336	307	263	269	269	209	314	319	257	268	228	272	281	221
LOC105222226	0.42	1.01	0.51	0.26	0.5	0.34	0.97	0.81	1.31	1.14	0.34	0.42	0.34	0.7	0.48	1.37	1.53	2.16	1.95	1.5	0.31	0.37	0.21	0.52	0.9	1.71	1.45	0.77	0.83	2.13	27	85	36	10	35	35	95	75	115	101	30	37	24	51	39	130	160	176	165
LOC105222227	14.96	13.71	13.12	11.88	15.11	11.11	11.14	11.08	10.73	14.46	10.37	15.39	14.2	15.02	13.55	10.54	11.62	12.31	9.46	11.92	13.52	13.31	15.44	15.37	14.27	10.88	10.44	10.33	13.3	11.8	267	319	256	128	290	311	299	282	259	354	254	376	274	303	303	276	334	276	220
LOC105222228	55.07	57.02	59.53	57.52	62.8	62.62	52.21	52.67	55.67	52.05	60.32	64.54	64.97	52.37	67.56	56.52	51.19	52.62	50.84	53.43	51.85	62.38	59.96	51.15	60.71	56.63	52.45	54.39	55.78	46.45	1096	1479	1295	691	1344	1954	1562	1495	1498	1421	1647	1758	1398	1178	1684	1651	1640	1315	1319
LOC105222229	0.62	0.24	0.35	0.13	0.5	0.05	0.2	0	0.17	0.56	0.22	0.17	0.36	0.48	0.06	0.21	0.24	0.12	0.35	0.39	0.18	0.19	0.69	0.34	0.09	0.65	0.2	0.06	0.45	0.27	8	4	5	1	7	1	4	0	3	10	4	3	5	7	1	4	5	2	6
LOC105222230	36.03	36.75	34.51	31.52	31.22	32.62	30.45	26.92	34.6	33.69	26.75	42.68	35.81	38.52	37.71	32.02	30.17	30.3	33.57	38.2	33.66	37.36	36.63	41.61	37.37	34.65	37.42	29.02	44.55	31.29	322	428	337	170	300	457	409	343	418	413	328	522	346	389	422	420	434	340	391
LOC105222231	3.71	3.75	3.58	2.97	3.74	3.47	3.51	3.12	3.56	3.32	6.88	4.24	5.28	3.26	4.17	5.56	2.59	3.34	3.47	2.83	4.05	3.23	4.19	3.07	5.96	5.95	2.8	2.73	2.43	2.77	244	321	257	118	264	358	347	292	316	299	620	381	375	242	343	536	274	276	297
LOC105222232	0.21	0.38	0.33	0.24	0.4	0.36	0.14	0.1	0.42	0.21	51.44	0.42	53.97	0.13	0.23	49.49	0.09	0.63	15.51	0.1	0.34	0.36	0.48	0.32	54.88	61.57	0.36	0.11	0.31	0.04	3	7	5	2	6	8	3	2	8	4	988	8	817	2	4	1017	2	11	283
LOC105222233	20.71	21.94	22.98	22.35	15.65	24.96	22.93	22.58	19.96	25.22	18.99	18.64	16.93	22.11	21.97	19.66	21.33	20	22.14	19.89	21.12	19.88	27.5	19.82	22.97	19.04	18.1	19.9	25.08	16.37	155	214	188	101	126	293	258	241	202	259	195	191	137	187	206	216	257	188	216
LOC105222236	0	0.04	0.05	0.09	0	0.17	0.25	0.11	0.24	0.24	0.55	0.04	0.4	0.14	0.22	0.55	0.07	0.13	0.46	0.08	0.13	0	0	0.05	0.73	0.67	0.37	0.17	0.04	0.06	0	1	1	1	0	5	7	3	6	6	14	1	8	3	5	15	2	3	11
LOC105222238	16.83	23.86	17.08	17.12	19.45	22.7	30.18	32.69	31.55	31.18	17.52	20.26	16.92	19.12	16.63	35.29	33.48	33.87	36.26	37.76	16.44	15.34	22.27	21.77	17.26	31.51	29.82	31.16	29.96	35.58	539	996	598	331	670	1140	1453	1493	1366	1370	770	888	586	692	667	1659	1726	1362	1514
LOC105222239	3.64	3.74	2.99	3.09	3.27	3.36	2.92	3.62	3.17	3.61	3.23	2.82	4.31	2.92	2.9	3.85	3.6	3.4	3.16	3.35	2.97	2.88	3.19	2.82	3.79	3.77	2.89	3.23	3.84	3.14	150	201	135	77	145	217	181	213	177	204	183	159	192	136	150	233	239	176	170
LOC105222240	137.38	125.02	126.24	130.12	137.85	131.62	123.54	127.22	123.77	127.3	119.28	120.09	111.83	117.23	133.05	137.44	128.79	130.8	132.5	133.59	114.23	114.91	126.74	133.35	120.5	129.83	113.58	136.81	127.1	122.98	1151	1365	1156	658	1242	1729	1556	1520	1402	1463	1371	1377	1013	1110	1396	1690	1737	1376	1447
LOC105222241	31.25	29.29	33.26	30.64	33.12	29.51	35.03	29.7	32.27	30.88	30.34	30.48	27.21	32.16	30.19	29.05	28.63	27.93	24.53	30.3	27.62	31.21	32.28	25.57	29.91	27.51	30	31.74	32.47	27.2	343	419	399	203	391	508	578	465	479	465	457	458	323	399	415	468	506	385	351
LOC105222242	22.74	19.63	21.02	18.64	18.61	17.82	20.48	23.83	18.57	21.15	24.6	18.69	19.71	19.17	20.71	21.7	23.02	19.52	19.98	19.35	17.03	19.69	20.91	20.96	23.27	20.07	18.35	25.11	24.3	24.18	192	216	194	95	169	236	260	287	212	245	285	216	180	183	219	269	313	207	220
LOC105222243	10.06	8.85	7.76	9.95	9.95	12.32	10.54	11.15	10.77	9.42	9.4	9.55	9.22	9.54	9.03	10.38	10.62	11.77	13.3	11.18	10.51	11.16	9.44	9.2	11.78	10.97	9.66	10.46	10.24	10.65	206	236	174	123	219	396	325	326	298	265	264	268	204	221	232	312	350	303	355
LOC105222245	3.65	4.61	3.24	4.84	3.29	3.44	2.73	2.48	2.62	2.7	4.38	3.9	3.38	4.62	4.04	2.87	1.99	3.45	3.97	2.78	4.34	4.22	3.86	3.77	4.71	4.11	2.33	3.68	3.2	2.68	65	107	63	52	63	96	73	63	63	66	107	95	65	93	90	75	57	77	92
LOC105222246	24.81	25.61	24.34	22	25.44	26.82	23.59	26.23	25.48	26.85	25.47	24.76	23.4	22.93	22.92	24.84	27.17	24.16	26.73	26.65	24.93	24.41	25.26	23.25	26.07	26.87	26.92	26	24.32	24.09	1597	2149	1713	855	1761	2707	2283	2408	2218	2371	2250	2182	1629	1668	1848	2347	2816	1953	2243
LOC105222247	86.13	75.55	103.55	132.58	87.12	138.19	131.43	102.7	120	111.21	93.22	122.22	90.45	95.22	60.3	221.94	234.43	143.46	197.8	200.57	65.74	80.74	74.65	69.99	85.15	227.89	164.97	230.18	211.57	179.46	1299	1485	1707	1207	1413	3268	2980	2209	2447	2301	1929	2523	1475	1623	1139	4913	5692	2717	3889
LOC105222248	0.97	0.96	0.95	1.04	1.33	0.49	0.66	0.67	0.87	0.88	0.87	0.62	0.94	1.04	1.02	1.12	0.85	0.86	0.9	0.88	0.84	1.3	1.21	0.88	1.09	0.95	0.83	0.94	0.44	0.85	48	59	51	32	73	39	51	49	59	56	60	43	51	60	65	84	69	53	59
LOC105222249	240.34	186.31	250.74	165.61	182.72	89.09	82.61	83.31	85.08	85.58	158.34	147.74	213.49	142.41	180.56	73.37	71.75	79.02	75.03	78.52	153.04	168.59	242.28	152.28	164.2	75.64	76.31	85.66	88.53	74.28	6268.65	6332.94	7147.69	2607.3	5124.98	3643.29	3239.19	3098.77	3000.14	3062.01	5666.11	5273.96	6020.8	4197.83	5898.08	2808.52	3012.47	2587.9	2550.95
LOC105222250	17.13	15.35	19.04	21	16.86	20.46	22.95	23.11	21.41	23.22	16.91	17.09	19.24	16.38	19.54	18.88	21.5	20.27	19.29	21	14.7	21.45	17.19	17.14	18.71	18.11	18.63	23.97	20.64	17.78	283.35	331.06	344.31	209.7	300.02	530.71	570.81	545.23	478.86	526.99	383.89	387.04	344.2	306.17	404.92	458.48	572.53	421.1	416.05
LOC105222251	0.8	2.59	4.73	1.65	2.77	1.39	0.4	2.23	1.18	1.3	1.88	2.76	1.29	0.53	1.9	0.54	1.85	0.47	1.98	0.87	2.13	4.97	4.25	1.78	1.55	2.76	2.02	2.51	1.31	0.91	4	17	26	5	15	11	3	16	8	9	13	19	7	3	12	4	15	3	13
LOC105222252	6.02	5.11	5.73	4.38	5.48	4.65	4.74	4.63	4.73	4.25	4.27	5.15	5.42	4.44	5.65	4.64	3.87	4.44	4.76	4.6	4.36	5.45	3.98	4.32	5.31	4.66	4.36	4	3.94	3.78	228	252	237	100	223	276	270	250	242	221	222	267	222	190	268	258	236	211	235
LOC105222253	124.06	113.13	121.33	126.27	124.94	137.59	142.44	148.28	136.52	142.52	118.82	113.56	117.11	124.05	115.71	125.21	129.49	128.46	126.69	130.79	123.49	112.61	133.39	114.87	112.13	126.43	119	139.72	140.52	133.18	1713	2036	1829	1051	1856	2976	2954	2917	2549	2700	2249	2146	1746	1937	2001	2535	2876	2228	2280
LOC105222254	5.32	4.64	6.21	3.71	5.11	4.68	4.82	4.67	5.44	6.41	13.8	6.06	15.18	5.3	5.58	16.52	6.41	5.55	9.96	7.12	4.36	4.18	6.6	4.57	10.94	15.35	6.61	5.31	5.47	5.78	102.36	118.58	146	48.16	118.21	158	156	143.44	158.24	189.28	407.4	166.51	327.35	129	138.34	521.86	221.9	150	279.36
LOC105222255	21.63	22.39	22.54	19.13	19.04	14.59	15.79	16.51	16.99	16.32	21.06	39.21	24.83	29.28	24.46	21.9	14.88	18.78	17.6	19.7	23.41	21.22	37.77	21.83	22.29	19.58	20.96	19.84	15.79	20.63	480.64	648.42	550	256.84	456.79	510	526	522.56	510.76	497.72	643.6	1212.49	599.65	739	681.66	713.14	534.1	522	510.64
LOC105222256	0	0.28	0.04	0	0.09	0.03	0	0	0.03	0.1	0.07	0.17	0.06	0.04	0.04	0.69	0.06	0	0.14	0.03	0	0	0	0	0	0.11	0.06	0	0	0.03	0	8	1	0	2	1	0	0	1	3	2	5	2	1	1	22	2	0	4
LOC105222257	5.72	6.03	5.81	5.13	6.03	5.13	5.58	5.24	5.3	4.66	6.14	6.33	5.72	5.34	5.75	4.55	5.26	5.03	5.89	5.44	5.83	6.11	6.29	5.68	5.74	4.29	5.77	4.66	4.38	4.38	309	421	341	167	349	431	446	403	384	342	452	464	329	324	386	358	453	338	412
LOC105222258	100.58	102.97	95.15	98.83	107.17	96.13	93.03	107.53	100.71	106.3	103.1	99.53	94.7	101.84	110.17	103.25	100.53	113.25	107.12	107	98.9	98.73	103.23	98.72	97.36	91.33	92.06	116.72	99.69	97.09	1885	2515	1949	1118	2160	2825	2621	2874	2552	2733	2651	2553	1919	2157	2586	2840	3033	2665	2617
LOC105222259	58.17	58.71	63.48	66	66.09	61.79	60.08	54.84	62.03	57.59	55.19	64.17	59.46	50.58	60.46	55.52	51.89	54.08	52.36	56.39	55.03	58.16	57.54	55.94	53.47	50.92	59.12	58.71	56.62	54.56	514	676	613	352	628	856	798	691	741	698	669	776	568	505	669	720	738	600	603
LOC105222260	20.67	23.21	25.08	23.43	26.91	17.48	16.64	18.92	17.54	17.13	18.08	17.17	17.71	20.02	27.45	15.12	15	19.93	15.69	21.02	26.64	24.21	22.27	23.14	17.01	17.93	13.08	15.78	19.07	16.9	95	139	126	65	133	126	115	124	109	108	114	108	88	104	158	102	111	115	94
LOC105222262	13.02	13.36	13.19	16.33	13.6	15.04	15.93	16.49	15.3	13.16	15.04	14.02	12.04	15.17	12.49	13.62	15.14	12.8	12.5	16.38	12.49	14.94	12.05	11.4	13.46	15.11	14.24	16.68	15.93	13.44	243	325	269	184	273	440	447	439	386	337	385	358	243	320	292	373	455	300	304
LOC105222263	30.9	26.56	25.78	25.34	28.47	19.74	18.98	22.23	19.82	19.55	25.92	29.73	29.44	23.68	28.62	23.56	23.37	26.87	23.93	26.24	22.21	32.47	27.44	33.92	30.8	24.36	25.13	19.23	19.54	21.98	985	1102	898	487	974	987	908	1008	853	854	1132	1295	1014	852	1141	1102	1198	1074	995
LOC105222264	9.04	6.01	5.88	7.33	7.66	5.13	4.41	5.64	6.99	4.83	6.59	5.29	4.28	7.83	6.74	6.98	5.87	4.64	6.32	3.8	8.12	10.05	7.01	7.72	4.94	3.72	4.25	7.29	6.02	5.67	45	39	32	22	41	40	33	40	47	33	45	36	23	44	42	51	47	29	41
LOC105222265	3.11	3.44	3.78	2.07	3.55	2.72	3.99	2.8	2.36	3.17	2.43	2.89	2.63	3.17	3.3	2.75	2.7	3.04	2.96	3.29	2.53	3.77	3.8	2.02	2.72	3.62	2.71	3.68	3.21	2.91	70	101	93	28	86	96	135	90	72	98	75	89	64	81	93	91	98	86	87
LOC105222266	11.11	10.47	10.57	8.93	11.15	9.61	11.49	10.33	9.92	9.78	11.46	12.94	10.38	9.63	10.01	12.96	10.11	11.74	9.37	10.07	11.25	10.86	11.26	11.6	9.33	12.2	11.27	8.67	12.29	8.86	101	124	105	49	109	137	157	134	122	122	143	161	102	99	114	173	148	134	111
LOC105222268	27.85	29.05	30.64	31.84	25.47	26.42	24.11	23.16	28.6	22.65	29.61	24.89	29.05	28.41	23.89	29.09	27.09	25.02	26.57	28.33	20.25	25.75	28.99	27.77	30.33	29.87	27.67	27.03	22.19	27.01	242	329	291	167	238	360	315	287	336	270	353	296	273	279	260	371	379	273	301
LOC105222269	67.55	61.45	57.35	56.05	60.06	58.35	54.49	63.21	56.25	61.8	62.77	57.57	55.34	60.91	61.97	59.82	60.65	64.98	58.51	62.06	49.99	56.42	62.33	65.17	62.14	56.3	52.79	70.36	57.83	60.48	1208	1432	1121	605	1155	1636	1465	1612	1360	1516	1540	1409	1070	1231	1388	1570	1746	1459	1364
LOC105222270	20.65	18.73	24.82	22.08	25.84	25.38	23.66	25.8	24.65	23.26	20.94	22.29	20.92	20.76	22.78	22.45	23.38	24.29	23.55	24.34	21.98	24.06	19.11	19.97	21.8	23.79	21.77	28.49	26.19	22.3	220	260	289	142	296	424	379	392	355	340	306	325	241	250	304	351	401	325	327
LOC105222271	0.12	0.09	0.05	0.1	0	0.11	0	0	0.04	0	0.09	0	0.05	0	0.09	0	0	0	0	0	0	0.07	0	0.31	0.13	0.05	0	0	0.17	0.07	2	2	1	1	0	3	0	0	1	0	2	0	1	0	2	0	0	0	0
LOC105222272	0	0	0	0	0	0	0	0	0	0	0	0	0	0	0	0	0	0	0	0	0	0	0	0	0	0	0	0	0	0	0	0	0	0	0	0	0	0	0	0	0	0	0	0	0	0	0	0	0
LOC105222273	0	0	0	0	0	0	0	0	0	0	0	0	0	0	0	0	0	0	0.06	0	0	0	0	0	0	0	0	0.03	0	0	0	0	0	0	0	0	0	0	0	0	0	0	0	0	0	0	0	0	2
LOC105222274	0	0	0	0	0	0	0	0	0	0	0	0	0	0	0	0	0	0	0	0	0	0	0	0	0	0	0	0	0	0	0	0	0	0	0	0	0	0	0	0	0	0	0	0	0	0	0	0	0
LOC105222275	0	0.12	0	0	0	0	0	0.03	0	0	0.03	0	0	0	0.04	0	0.04	0	0.02	0	0.03	0	0.13	0	0	0.02	0	0	0.02	0.03	0	7	0	0	0	0	0	2	0	0	2	0	0	0	2	0	3	0	1
LOC105222276	5.79	9.78	7.72	16.41	13.86	16.01	8.35	8.67	8.92	9.08	10.15	15.05	12.43	9.89	11.9	11.63	11.45	8.44	10.01	15.81	10.14	15.45	7.61	14.38	11.39	8.23	14.61	6.11	8.67	8.01	59	130	86	101	152	256	128	126	123	127	142	210	137	114	152	174	188	108	133
LOC105222278	3.73	3.03	3.04	2.89	3.19	2.26	2.44	2.82	3.09	2.37	3.52	3.51	3.32	2.68	2.76	4.09	3.38	3.52	3.95	2.92	2.87	4.23	3.38	3.28	3.59	4.28	3.38	2.73	2.23	3.27	139	147	124	65	128	132	137	150	156	121	180	179	134	113	129	224	203	165	192
LOC105222280	5.93	6	6.61	6.74	6.32	5.69	5.54	7.15	5.17	5.33	8.03	6.35	9.54	5.73	5.68	9.69	5.35	6.42	8.27	6.89	5.4	5.93	5.69	7.1	12.22	10.86	5.59	4.17	5.63	5.5	150	198	183	103	172	226	211	258	177	185	279	220	261	164	180	360	218	204	273
LOC105222281	11.26	7.7	7.09	7.75	8.93	7.34	7.88	8.51	8.08	7.85	9.24	9.22	9.38	8.02	8.52	7.07	7.3	9.59	6.54	8.99	6.95	11.27	9.48	10.5	11.59	8.41	8.71	7.61	7.44	8.05	231	206	159	96	197	236	243	249	224	221	260	259	208	186	219	213	241	247	175
LOC105222282	1.43	1.9	1.39	1.34	1.33	1.67	1.61	1.7	1.51	1.84	2.05	1.88	2.11	1.22	1.9	1.59	1.51	1.55	1.61	1.83	1.81	2.56	2.52	1.83	1.75	1.65	1.37	1.61	1.01	2.22	30	52	32	17	30	55	51	51	43	53	59	54	48	29	50	49	51	41	44
LOC105222283	11.59	9.48	9.4	7.96	10.15	8.55	9.38	9.14	8.97	8.74	9.89	10.06	10.16	9.03	10.35	10.27	9.56	9.71	10.13	11.34	7.91	11.67	9.37	12.64	11.59	8.62	10.12	6.75	7.51	8.73	345	368	306	143	325	399	420	388	361	357	404	410	327	304	386	449	458	363	393
LOC105222284	2.39	1.27	1.63	1.74	1.77	3.04	3.52	3.46	2.15	2.03	2.8	1.74	1.94	1.47	0.97	3.97	5.22	2.87	3.19	2.97	1.15	2.27	1.09	2.96	3.55	8.16	1.88	1.82	1.98	2.51	59	41	44	26	47	118	131	122	72	69	95	59	52	41	30	144	208	89	103
LOC105222285	233.81	228.37	231.1	254.22	215.37	292.75	256.28	250.19	250.02	264.76	196.98	207.78	224.21	211.97	242.4	229.71	261.27	288.72	225.1	269.89	195.82	239.88	230.46	207.99	199.47	227.56	227.67	275.87	311.22	283.37	1059	1348	1144	695	1049	2079	1745	1616	1531	1645	1224	1288	1098	1085	1375	1527	1905	1642	1329
LOC105222286	18.45	30.32	21.02	35.76	40.3	32.41	23.62	18.19	22.14	20.3	29.69	48.07	45.4	23.56	47.39	22.53	6.38	11.78	15.89	22.38	37.66	47	39.55	28.78	48.01	27.62	33.01	26.21	31.4	10.01	106	227	132	124	249	292	204	149	172	160	234	378	282	153	341	190	59	85	119
LOC105222287	412.19	687.42	337.42	766.86	837.79	789.14	645.92	444.35	522.04	497.39	719.97	1077.57	886.8	531.55	948.19	563.69	217.19	228.81	408.09	633.21	746.51	1025.51	846.61	647.17	990.73	528.02	850.55	465.5	670.19	257.72	3789	8235	3390	4255	8282	11374	8926	5825	6488	6272	9080	13557	8814	5522	10916	7605	3214	2641	4890
LOC105222288	12.34	26.5	12.19	24.8	24.32	19.62	16.74	9.69	12.9	13.67	23.62	30.88	26.77	19.79	30.6	12.89	6.64	4.98	8.96	17.92	18.77	27.76	15.17	16.91	30.12	13.94	25.34	11.54	17.06	5.49	75	210	81	91	159	187	153	84	106	114	197	257	176	136	233	115	65	38	71
LOC105222289	0	0.02	0	0.15	0	0	0.02	0.02	0.05	0.04	0	0	0	0.03	0	0.06	0	0	0	0	0.07	0.08	0	0	0	0.07	0	0.02	0.02	0	0	1	0	3	0	0	1	1	2	2	0	0	0	1	0	3	0	0	0
LOC105222290	3.04	2.2	2.68	3.75	2.73	5.93	7.52	8.94	7.92	8.83	3.04	1.94	3.86	3.28	2.57	6.96	7.33	6.64	5.83	6.95	1.64	1.99	2.62	3.47	2.92	8.66	5.89	5.71	6.27	6.16	86	81	83	64	83	263	320	361	303	343	118	75	118	105	91	289	334	236	215
LOC105222291	0.04	0	0	0.07	0	0.06	0.06	0.06	0.03	0.16	0	0.1	0	0	0	0.12	0.16	0.1	0.1	0.06	0	0	0.1	0	0	0.03	0.33	0.1	0.13	0.13	1	0	0	1	0	2	2	2	1	5	0	3	0	0	0	4	6	3	3
LOC105222292	0	0.04	0	0	0	0.06	0.04	0.03	0.06	0.03	0.06	0	0.02	0.05	0	0	0.06	0.02	0	0.03	0	0.02	0	0	0.02	0	0	0.02	0.06	0	0	3	0	0	0	5	3	2	4	2	4	0	1	3	0	0	5	1	0
LOC105222293	2.98	2.64	2.18	3.23	2.39	1.91	2.05	3.09	2.82	2.8	1.75	2.19	1.78	3.09	1.81	4	3.6	4.98	6.47	4.34	1	1.83	1.37	3.99	2.96	3.85	3.53	2.28	2.37	3.8	110	127	88	72	95	111	114	163	141	142	89	111	71	129	84	217	214	231	312
LOC105222294	60.77	72.26	50.01	43.82	49.81	48.71	68.69	55.22	64.29	48.34	52.43	60.81	58.89	52.57	57.26	78.35	67.97	79.16	86.16	74.17	47.96	57.19	52.09	66.41	52.8	65.67	72.58	59.51	64.12	84.25	1383	2143	1244	602	1219	1738	2350	1792	1978	1509	1637	1894	1449	1352	1632	2617	2490	2262	2556
LOC105222295	1.61	1.63	1.38	1.77	1.65	1.07	1.34	1.58	1.22	1.26	1.53	1.3	1.7	1.32	1.27	1.17	1.6	1.88	1.98	1.38	1.1	1.79	1.88	1.97	1.98	1.54	1.74	0.81	1.25	1.2	80	105	75	53	88	83	100	112	82	86	104	88	91	74	79	85	128	117	128
LOC105222296	63.91	72.36	70.22	67.59	73.4	66.55	69.96	77.95	76.44	76.1	64.08	69.54	67.66	68.1	65.98	81.58	74.86	82.4	82.92	83.13	61.2	60.1	69.61	72.05	63.64	70.96	78.84	77.03	68.83	83.14	2400	3541	2882	1532	2964	3918	3949	4174	3881	3920	3301	3574	2747	2890	3103	4496	4525	3885	4059
LOC105222298	0.66	0.88	1.32	0.52	0.73	0.54	1.34	0.98	0.53	0.78	1.45	0.78	0.98	0.54	0.74	0.6	0.64	1.45	1.15	1.15	0.93	0.63	0.61	0.73	1.59	1.19	0.86	0.76	0.58	0.62	14.67	25.56	32.29	7.04	17.61	18.86	45.01	31.34	15.91	23.77	44.44	23.91	23.75	13.62	20.81	19.72	22.9	40.67	33.56
LOC105222299	5.14	3.88	3.86	3.45	4.06	3.05	3.88	3.72	3.53	3.8	3.76	4.21	4.36	3.44	3.8	4.58	4.31	4.9	6.09	4.87	2.95	4.62	3.86	5.72	5.19	4.66	4.21	2.77	2.51	4.22	673.33	662.44	552.71	272.96	572.39	626.14	764.99	695.66	626.09	683.23	675.56	755.09	618.25	509.38	623.19	881.28	909.1	806.33	1039.44
LOC105222300	28.82	30.3	27.57	27.6	36.7	28.64	25.94	26.24	26.12	27.19	34.1	35.21	35.06	29.82	32.05	27.24	24.73	23.27	25.23	24.49	34.8	31.71	33.54	27.08	33	25.99	25.44	25.91	26.29	21.46	455	617	486	267	621	694	611	584	562	588	734	756	598	522	623	637	633	454	520
LOC105222301	1.11	1.42	1.92	1.84	1.49	1.02	0.41	0.87	0.37	0.81	1.08	1.71	1.94	2.4	1.58	1.01	1.46	1.38	1.33	0.9	0.88	3.09	2.22	1.54	1.79	1.33	0.52	0.58	1.26	1.35	9	15	17	9	13	13	5	10	4	9	12	19	17	22	16	12	19	14	14
LOC105222302	61.19	57.87	56.11	72.77	63.45	57.61	45.48	50.75	54.04	50.54	54.67	64.99	56.72	57.44	60.44	51.38	47.88	52.47	47.04	49.76	62.4	59.06	53.91	66.17	57.38	51.39	49.23	53.35	55.48	46.4	443	546	444	318	494	654	495	524	529	502	543	644	444	470	548	546	558	477	444
LOC105222303	25.51	22.14	22.14	22.35	21.82	22.55	21	23.2	25.08	23.72	23.01	24.97	22.33	24.01	20.89	24	26.95	24.92	27.04	24.54	22.18	28.69	22.78	25.54	25.97	22.2	22.26	21.66	20.31	26.9	967	1091	921	513	893	1341	1207	1263	1291	1238	1198	1298	923	1030	995	1341	1651	1195	1341
LOC105222304	0.44	0.29	0.15	0.11	0.41	0.15	0.48	0.26	0.35	0.35	0.59	0.28	0.25	0.42	0.32	0.53	0.38	0.32	0.18	0.12	0.24	0	0.62	0.21	0.53	0.42	0.49	0.31	0.32	0.33	13	11	5	2	13	7	22	11	14	14	24	12	8	14	12	23	18	12	7
LOC105222305	39.42	37.79	34.38	32.7	39.63	36.55	36.69	39.4	36.63	36.34	33.48	38.42	37.6	36.97	38.1	38.73	38.43	39.13	42.77	46.04	30.69	39.7	37.89	42.52	39.9	38.84	43.35	30.46	36.11	35.72	1368	1709	1304	685	1479	1989	1914	1950	1719	1730	1594	1825	1411	1450	1656	1973	2147	1705	1935
LOC105222306	0.77	0.33	0.3	0.4	1.03	1.39	0.99	1.13	1.35	1.03	1.6	0.35	1.07	0.62	0.47	2.44	0.81	0.97	1.14	0.72	0.59	0.5	0.41	0.58	0.74	2.21	1.1	0.82	0.62	0.81	23	13	10	7	33	65	47	47	57	43	61	13	35	20	18	103	42	38	45
LOC105222307	2.73	3.3	1.92	3.82	2.73	2.41	2.93	4.04	3.49	3.13	3.21	3.14	3.98	3.34	3.1	4.14	2.74	2	2.33	3.12	4.36	3.8	2.59	2.9	2.22	3.07	3.91	2.89	2.45	3.38	26	41	20	22	28	36	42	55	45	41	42	41	41	36	37	58	42	24	29
LOC105222308	49.95	42.59	47.39	46.59	43.26	54.58	59.52	58.83	58.91	57.45	44.21	44.71	45.19	46.57	41.75	63.7	61.76	55.17	59.86	54.02	45.26	44.36	43.78	46.94	52.73	58.78	57.62	54.86	62.1	56.89	1246	1389	1296	706	1156	2141	2246	2097	1989	1976	1514	1538	1230	1320	1308	2346	2485	1732	1959
LOC105222309	17.4	15.7	16.8	19.99	18.7	21.19	16.06	16.68	16.04	18.11	18.68	17.89	17.15	17.26	20.04	15.67	15.32	16.79	14.89	17.4	17.88	16.4	16.82	17.74	20.12	14.69	16.29	16.27	17.63	15.55	199	234	210	138	230	380	276	272	248	284	293	280	212	223	287	263	282	241	222
LOC105222310	14.44	12.99	16.04	14.57	13.17	12	10.69	10.56	10.7	11.56	17.35	12.93	14.82	12.26	13.52	12.75	12.11	12.17	11.54	11.68	11.49	12.47	12.91	11.37	13.52	12.65	10.4	10.8	10.11	11.48	913	1079	1100	562	899	1185	1012	954	907	999	1513	1131	1016	872	1085	1206	1238	968	960
LOC105222311	21.43	20.62	24.44	23.49	30.65	28.21	30.49	23.21	28.74	27.19	21.17	23.23	20.72	21.66	27.74	26.39	21.68	30.27	20.57	25.9	31.16	26.07	21.48	22.29	25.74	20.25	21.77	31.36	35.06	24.24	107	134	134	71	165	221	229	166	195	187	146	159	112	123	174	194	175	190	134
LOC105222312	35.94	42.31	42.33	31.61	37.03	24.34	23.98	25.21	21.58	26.85	26.93	33.8	33.24	29.45	34.46	33.86	41.56	61.23	51.74	40.77	29.41	37.59	41.43	46.31	44.35	32.99	36.54	22.56	23.74	42.31	324	497	417	172	359	344	325	324	263	332	333	417	324	300	389	448	603	693	608
LOC105222313	10.52	9.57	9.14	7.6	10.05	10.31	8.78	8.09	9.25	8.97	8.97	9.14	8.34	9.09	9.21	9.74	9.94	8.93	10.59	7.82	7.48	9.04	10.28	11.14	10.89	9.86	8.22	8.52	8.57	8.9	259	307	246	113	266	398	325	284	308	303	303	308	222	253	284	352	394	276	340
LOC105222314	23.52	20.69	21.18	19.17	22.26	20.27	22.9	22.99	24.28	23.84	26.1	25.46	21.13	23.11	23.53	22.85	22.48	24.61	25.06	23.51	22.08	21.86	22.21	20.76	23.74	23.35	20.84	23.6	21.74	24.67	561	643	552	276	571	758	821	782	783	780	854	831	545	623	703	800	863	737	779
LOC105222315	29.66	31.24	28.27	27.09	31.9	24.76	29.4	27.19	26.68	25.25	26.86	28.91	24.81	28.14	27.88	29.14	24.14	27.19	28.33	27.99	27.79	28.81	30.77	30	31.29	26.87	27.72	24.71	25.41	24.51	722	991	752	398	835	945	1076	944	878	843	897	963	653	774	850	1041	946	831	899
LOC105222316	16.58	13.63	13.92	11.28	14.73	15.99	15.75	16.34	14.93	18.24	13.05	13.35	13.85	14.38	13.83	16.52	14.93	14.78	15.01	14.43	15.84	12.03	14.08	14.05	12.17	14.96	13.41	18.04	14.64	15.23	560	600	514	230	535	847	800	787	682	845	605	617	506	549	585	819	812	627	661
LOC105222317	1.77	1.77	1.84	3.13	3.46	1.99	1.22	1.94	0.92	1.46	2.54	1.98	1.96	1.88	2.17	1.57	1.25	1.69	1.63	1.93	2.03	2.07	1.92	1.95	1.91	2	1.4	1.63	1.29	1.09	30	39	34	32	63	53	31	47	21	34	59	46	36	36	46	39	34	36	36
LOC105222318	0	0	0	0	0	0.33	0	0	0	0	0	0	0	0	0	0	0.33	0.42	0	0	0.31	0	0	0	0	0.2	0	0	0	0.3	0	0	0	0	0	2	0	0	0	0	0	0	0	0	0	0	2	2	0
LOC105222319	165.95	207.24	201.55	173.24	228.26	287.57	304.08	286.13	289.76	312.99	179.54	227.41	192.92	191.09	196.76	289.98	313.77	357.16	322.76	332.44	198.11	198.23	193.29	189.06	211.36	351.71	335.77	349.99	349.11	309.86	4869	7924	6463	3068	7202	13229	13412	11972	11494	12597	7227	9132	6120	6336	7230	12487	14820	13158	12344
LOC105222320	0.36	0.48	0.69	0.07	0.33	0.28	0.68	0.47	0.62	0.42	7.96	0.52	7.6	0.51	0.04	6.72	0.25	0.5	3.07	0.42	0.26	0.22	0.1	0.28	7.39	9.44	0.68	0.39	0.42	0.43	8	14	17	1	8	10	23	15	19	13	246	16	185	13	1	222	9	14	90
LOC105222321	37.09	29.9	33.82	28.2	30.46	33.43	31.17	33.31	28.64	28.88	27.01	29.04	22.58	29.32	31.67	26.38	22.42	26.23	27.83	27	31.05	27.79	27.86	30.93	28.92	24.3	30.35	27.96	26.38	24.08	818	872	831	379	723	1155	1036	1074	881	895	819	868	537	751	887	868	814	726	812
LOC105222322	12.75	12.03	13.15	10.24	12.18	11.92	13.54	15.09	14.73	14.32	15.2	12.45	15.23	13.44	10.83	16.39	16.55	15.04	15.3	14.23	11.15	14.56	12.27	13.42	15.4	16.92	13.44	13.7	12.01	14.93	518	637	584	251	532	759	827	874	809	798	847	692	669	617	551	977	1082	767	810
LOC105222323	11.94	10.5	12.44	10.17	13.03	10.52	12.19	12.5	12.21	11.91	12.09	10.85	11.5	11.3	10.66	14.29	12.72	12.48	8.97	10.9	12.42	14.51	11.38	10.75	14.17	12.78	11.37	12.35	12.29	12.59	144	165	164	74	169	199	221	215	199	197	200	179	150	154	161	253	247	189	141
LOC105222324	5.8	4.35	5.48	4.96	3.91	5.36	4.7	3.44	5.75	4.69	3.3	4.79	6.84	5.75	6.16	5.47	4.16	3.81	3.76	4.63	4.47	4.3	5.16	4.1	5.05	3.83	5.88	4.32	6.7	4.91	91	89	94	47	66	132	111	77	122	101	71	103	116	102	121	126	105	75	77
LOC105222325	115.33	111	122.35	109.45	109.64	107.78	106.84	120.55	112.55	123.41	118.29	109.68	107.63	110.79	105.04	123.6	136.31	123.68	128.71	125.64	97.5	90.76	94.07	101.74	93.79	127.96	117.46	124.2	112.1	131.88	6316	7924	7319	3623	6459	9266	8794	9425	8352	9286	8911	8228	6396	6865	7217	9960	12050	8527	9208
LOC105222326	8.14	8	8.12	9.55	9.35	7.95	10.08	8.29	6.52	7.62	8.67	8.13	10.41	8.81	8.7	6.44	6.54	6.89	6.17	7.47	7.77	8.88	8.33	7.64	7.75	6.97	7.35	8.4	7.34	6.17	243	311	265	172	300	372	452	353	263	312	355	332	336	297	325	282	314	258	240
LOC105222327	10.02	18.77	27.44	25	23.77	78.7	60.23	61.81	52.88	73.45	20.29	18.77	16.42	14.27	23.84	50.35	71.77	76.21	61.68	63.88	21.04	14.96	22.83	18.14	20.2	44.85	60.08	59.13	59.58	67.47	154	376	461	232	393	1897	1392	1355	1099	1549	428	395	273	248	459	1136	1776	1471	1236
LOC105222328	116.34	123.86	111.32	117.5	109.94	129.18	108.4	124.81	119.2	123.99	113.09	108.47	115.62	124.52	137.87	133.85	106.51	121.79	111.51	111.63	115.86	111.21	116.08	116.57	121.78	120.24	110.78	142.62	123.48	112.77	1355	1880	1417	826	1377	2359	1898	2073	1877	1981	1807	1729	1456	1639	2011	2288	1997	1781	1693
LOC105222329	6.23	5.51	5.86	5.26	7.02	5.73	7.61	6.42	7.4	7.6	6.94	7.26	5.32	6.46	5.55	6.41	8.18	7.39	6.2	6.65	6.19	5.76	5.86	7.12	5.35	7.06	6.24	8.07	6.47	7.41	104	120	107	53	126	150	191	153	167	174	159	166	96	122	116	157	220	155	135
LOC105222330	32.63	35.61	36.42	35.23	30.08	35.05	33.52	37.74	37.44	37.57	37.09	31.93	37.53	33.92	34.89	38.37	37.86	37.69	37.59	35.73	34.25	32.23	31.61	35.13	33.05	35.08	33.66	38.07	35.21	37.83	1224	1750	1468	795	1224	2084	1914	2009	1894	1954	1919	1659	1504	1439	1653	2147	2327	1784	1861
LOC105222332	23.48	22.65	21.04	18.53	20.1	17.32	15.69	13.86	16.49	17.65	20.1	19.65	22.53	18.43	19.69	14.44	15.31	13.64	16.94	13.41	21.47	18.49	21.09	18.22	21.11	14.78	14.62	15.23	16.27	15.15	342	428	335	163	316	394	345	294	328	358	407	398	364	307	362	313	361	250	322
LOC105222333	7.66	4.09	4.61	6.05	4.89	4.47	3.98	3.63	3.56	4.15	6.17	4.8	7.49	4.13	4.6	5.97	2.95	2.79	4.82	3.23	5.55	4.38	3.69	4.11	5.54	3.26	3.09	3.34	3.68	2.81	105	73	69	50	72	96	82	71	66	78	116	90	111	64	79	120	65	48	86
LOC105222334	7.59	6.24	8.26	5.94	7.28	5.72	6.09	6.88	5.04	5.49	7.02	6.47	7.47	6.24	5.4	4.77	6.05	5	6.19	5.52	7.39	8.37	7.26	5.77	6.28	4.51	5.21	7.02	4.63	5.37	127	136	151	60	131	150	153	164	114	126	161	148	135	118	113	117	163	105	135
LOC105222335	1815.02	1737.53	1925.19	2006.84	1944.92	1583.7	1458.83	1472.04	1505.15	1476.98	1748.34	1772.4	1818.57	1824.5	1945.61	1353.94	1343.94	1393.02	1269.74	1363.33	1800.29	1828.08	1811.06	1777.48	1698.35	1270.97	1325.29	1564.14	1608.1	1353.78	14102	17552	16362	9342	16203	19178	16939	16250	15729	15655	18708	18820	15294	16039	18877	15449	16750	13623	12824
LOC105222336	17.08	14.02	13.95	15.52	12.68	9.69	13.81	11.91	11.34	11.65	23.3	13.72	26.42	14.18	13.64	25.63	11.67	12.07	13.67	12.77	12.94	13.89	12.4	13.38	19.39	21.3	12.29	12.74	11.67	10.04	372	398	332	204	297	331	452	370	334	348	696	409	622	349	372	819	409	330	388
LOC105222337	2.6	3.13	2.29	2.85	3.24	2.32	3.23	2.72	2.58	2.51	2.04	2.73	3.04	2.74	2.43	3.45	2.68	3.56	2.79	2.17	2.33	2.15	2.98	3.42	2.69	2.95	3.53	2.44	2.98	3.19	53	83	51	35	71	74	99	79	71	70	57	76	67	63	62	103	88	91	74
LOC105222338	5.96	7.47	5.2	7.38	9.11	4.11	5.42	3.12	4.36	4.95	6.14	6.96	6.72	6.06	5.91	4.34	4.13	4.26	3.94	4.83	7.01	7.28	6.63	5.08	7.27	4.01	5.22	6.54	5.16	3.63	87	142	83	65	143	94	119	65	86	99	123	139	106	100	108	93	97	78	75
LOC105222339	32.84	27.89	25.36	29.79	32.25	31.76	33.67	33.62	30.59	31.42	35.23	27.58	32.41	27.81	32.81	29.19	31.04	26.36	27.53	29.97	30.65	27.83	32.02	30.83	31.6	29.22	27.74	32.19	31.29	29.12	354	392	299	194	374	537	546	517	446	465	521	407	378	339	443	462	539	357	387
LOC105222341	19.05	19.93	17.31	18.35	19.54	17.9	18.25	18.95	21.02	20.26	19.13	22.57	18.18	19.32	20.24	20.18	19.45	19.68	22.53	20.34	18.61	19.94	19.96	20.27	19.21	19	19.75	16.7	18.61	17.88	700	954	695	407	772	1031	1008	993	1044	1021	964	1135	722	802	931	1088	1150	908	1079
LOC105222342	1.03	1.93	2.26	1.55	0.69	0.39	0.79	2.08	1.61	1.33	1.01	2.07	1.28	1.22	1.69	0.53	0.61	1.14	1.12	1.72	0.59	1.03	1.3	1.89	1.98	1.37	1.49	0.64	1.7	1.36	10.41	25.43	25	9.49	7.49	6.26	12	30.01	22.02	18.49	14.06	28.69	14	14	21.5	7.95	10.01	14.52	14.81
LOC105222343	4.24	2.97	4.02	3.33	3.19	2.45	2.42	3.33	3.35	3.07	3.86	4.11	3.39	3.87	3.96	3.33	2.98	3.38	3.66	4.01	3.09	2.83	3.37	3.82	4.21	4.23	3.7	2.95	2.46	3.13	115	106	120	55	93	105	98	130	124	115	144	153	99	119	132	133	131	116	130
LOC105222344	2.48	2.4	2.72	2.33	3.06	2.93	3.88	2.95	2.72	2.52	2.28	3.51	2.25	2.68	1.98	3.27	2.31	1.81	2.86	2.55	3.15	3.38	2.85	3.14	2.53	2.75	2.19	2.81	2.48	2.27	46	58	55	26	61	85	108	78	68	64	58	89	45	56	46	89	69	42	69
LOC105222345	37.25	39.05	38.3	35.74	40.88	47.94	44.25	44.67	44.28	47.45	37.98	43.65	40.83	40.6	39.69	41.33	41.46	41.28	41.8	46.01	40.12	40.1	38.82	39.64	38.96	40.63	46.87	42.73	38.04	40.84	1880	2569	2113	1089	2219	3794	3357	3215	3022	3285	2630	3015	2228	2316	2509	3062	3369	2616	2750
LOC105222346	25.33	22.88	23.64	24.2	25.26	33.07	29	29.14	31.96	31.34	21.42	24.62	23.3	22.39	22.44	32.4	29.47	30.01	31.49	30.08	21.46	25.57	22.2	25.37	21.4	29.19	28.59	25.86	27.13	25.12	706	831	720	407	757	1445	1215	1158	1204	1198	819	939	702	705	783	1325	1322	1050	1144
LOC105222347	9.91	12.01	10.83	13.1	12.27	16.21	12.77	12.89	12.47	10.84	14.41	17.93	12.31	10.46	14.27	11.43	10.16	10.52	11.57	15.04	13.94	14.48	12.77	11.66	12.13	10.85	14.49	8.6	12.48	7.86	206	313	223	164	261	496	361	368	327	303	373	483	260	238	340	326	300	261	284
LOC105222348	2.9	3.4	2.94	1.96	3.27	2.9	2.02	1.97	2.56	1.98	2.89	2.91	3.2	2.01	3.15	2.59	1.99	2.01	2.49	2.13	2.43	2.33	2.84	2.76	2.99	1.95	2.27	2.36	2.14	1.35	150	231	168	61	181	235	156	145	178	140	204	205	178	117	203	196	166	130	167
LOC105222349	25.23	20.46	19.61	23.28	22.85	20.96	20.72	20.22	18.44	17.97	23.95	23.53	22.94	21.03	21.93	20.25	15.49	17.36	19.21	19.27	22.61	22.28	23.33	23.21	22.73	18.64	19.31	18.5	17.84	17.06	774	819	661	431	750	1000	956	887	772	756	1016	986	761	728	851	911	763	674	771
LOC105222350	0.12	0	0.11	0	0	0.13	0.03	0.11	0.15	0.14	0.06	0.03	0.11	0	0	0	0.02	0.28	0.06	0.09	0.05	0	0.04	0	0	0	0.1	0.03	0.09	0.09	3	0	3	0	0	5	1	4	5	5	2	1	3	0	0	0	1	9	2
LOC105222351	0	0	0	0	0	0	0	0	0	0	0	0	0	0	0	0	0	0	0	0	0	0	0	0	0	0	0	0	0	0	0	0	0	0	0	0	0	0	0	0	0	0	0	0	0	0	0	0	0
LOC105222353	0.51	0.46	0.54	0.22	0.41	0.03	0.01	0.01	0	0	0.38	0.44	0.56	0.52	0.51	0	0.02	0	0.01	0.01	0.47	0.76	0.53	0.94	0.51	0	0.01	0	0	0.01	54	65	63	14	47	5	1	2	0	0	56	65	65	63	68	0	3	0	1
LOC105222354	9.44	11.32	8.69	8.92	9.17	10.08	10.99	9.77	10.77	9.47	9.88	9.76	8.76	10.05	9.57	9.01	10.12	9.1	8.21	8.68	9.32	8.17	8.74	7.94	8.97	8.85	8.48	8.85	7.8	8.15	289	452	291	165	302	484	506	427	446	398	415	409	290	348	367	405	499	350	328
LOC105222355	11.62	13.04	11.56	10.89	14.2	15.01	11.26	13.88	12.46	13.52	12.54	18.99	13.94	10.34	13.88	13.31	12.36	13.74	16.29	17.85	12.12	18.1	13.53	15.39	16.8	16.44	19.93	10.74	11.03	11.84	1126	1647	1224	637	1480	2280	1640	1918	1632	1797	1667	2519	1461	1132	1685	1893	1928	1672	2057
LOC105222356	1.53	1.42	2.04	1.21	1.99	2.72	2.35	2.53	1.98	2.21	2.53	2.33	2.15	2.14	2.52	2.15	1.9	2.33	1.93	1.9	1.86	2.43	3.08	1.48	2.6	2.38	1.86	2.11	2.09	2.09	48	58	70	23	67	134	111	113	84	95	109	100	73	76	99	99	96	92	79
LOC105222357	17.91	20.06	21	20.67	17.03	19.02	16.81	18.95	17.68	15.74	19.06	19.98	17.31	19.03	18.39	15.85	16.89	17.19	13.56	17.37	19.01	17	19.25	14.72	17.06	16.75	18.48	18.66	17.99	16.79	224	327	287	156	229	373	316	338	299	270	327	342	234	269	288	291	340	270	221
LOC105222358	95.33	75.22	70.93	77.39	82.15	79.44	86.58	95.81	87.29	87.9	74.97	80.66	77.44	77.61	75.8	100.75	108.43	104.12	110.57	102.69	78.33	87.76	81.55	87.87	85.12	95.66	93.39	87.39	90.75	95.79	908.2	933.97	738.53	445.01	841.61	1186.64	1240.06	1301.64	1124.33	1148.75	979.9	1051.77	797.67	835.58	904.42	1408.74	1662.93	1245.51	1373.2
LOC105222359	0	0	0.41	0	0	0	0.1	0.21	0	0	0	0	0	0	0	0	0	0	0	0	0	0	0	0.13	0	0.12	0.26	0	0	0	0	0	3	0	0	0	1	2	0	0	0	0	0	0	0	0	0	0	0
LOC105222360	0	0.08	0	0	0	0	0.03	0.04	0.04	0.04	6.33	0	6.74	0	0	5.88	0.03	0.08	1.86	0	0	0	0.06	0	7.33	10.91	0.04	0	0.04	0.12	0	2	0	0	0	0	1	1	1	1	168	0	141	0	0	167	1	2	47
LOC105222361	290.43	564.16	267.1	548.69	685.33	711.01	512.92	418.01	412.93	433.58	483.47	848.96	636.73	388.93	648.44	478.38	211.68	197.84	367.2	584.58	569.58	800.32	679.39	483.77	763.9	455.5	913.42	413.66	691.03	211.86	1820	4606	1829	2075	4618	6980	4829	3736	3498	3725	4157	7280	4314	2753	5088	4397	2136	1555	2999
LOC105222362	0.94	0	0.12	0	0.12	0.17	0	0.09	0.1	0.1	0.2	0.39	0.12	0.12	0.53	0	0.33	0	0.1	0.1	0.32	0.17	0.15	0.84	0.75	0.21	0	0.11	0	0.23	7	0	1	0	1	2	0	1	1	1	2	4	1	1	5	0	4	0	1
LOC105222363	40.63	36.51	39.51	36.45	38.25	27.54	32.68	30.39	33.73	28.19	48.39	40.98	47.85	39.22	37.54	41.07	30.34	29.2	33.17	27.77	37.95	41.26	37.94	40.22	46.82	40.2	33.36	29.36	30.3	36.94	1052	1246	1115	587	1054	1124	1271	1124	1175	1006	1704	1452	1333	1153	1213	1554	1268	959	1127
LOC105222364	28.12	29.2	27.08	25.92	27.9	23.58	24.04	22.28	24.97	22.12	28.48	27.84	26.97	23.04	29.5	23.34	24.42	23.34	23.01	22.99	22.59	29.16	26.87	26.31	25.02	23.47	25.98	20.65	21.27	24.18	601.1	813.26	632.65	334.42	641.22	790.2	772.46	678.99	721.56	648.57	835.17	814.36	623.19	556.6	789.71	732.25	840.31	626.53	641.05
LOC105222366	63.46	59.16	68.53	62.36	69.49	63.66	66.96	69.04	74.2	70.88	53.45	63.31	58.21	57.04	63.56	78.3	80.48	78.67	80.69	84.21	64.03	67.71	54.45	68.96	67.33	63.45	72.44	71.49	69.25	77.2	419.8	510.03	495.47	248.99	494.39	660.36	665.94	651.36	663.67	643.25	485.1	573.23	416.33	426.42	526.58	760.26	857.07	653.49	695.8
LOC105222367	47.41	50.68	48.97	41.51	46.73	39.48	46.49	37.19	42.33	45.05	39.96	42.46	45.2	40.89	41.04	58.84	55.87	59.36	60.72	51	32.65	44.85	46.5	58.14	52.81	48.77	48.34	37.6	47.51	57.22	982	1356	1113	521	1036	1271	1421	1102.99	1186	1285	1140	1193	1005	948	1063	1777	1843	1550	1623
LOC105222368	25.57	27.24	29.26	33.61	28.49	27.99	29.81	27.94	28.71	26.41	27.61	28.59	28.72	27.84	34.71	24.12	25.85	25.47	25.17	27.22	25.72	28.73	25.73	26.09	26.93	24.64	27.96	27.91	33.94	24.06	247	343	309	196	296	424	433	385	375	350	366	378	300	304	420	342	402	309	317
LOC105222369	8.65	7.35	7.6	9.17	12.98	11.11	10.21	7.69	8.87	8.49	7.9	9.95	11.95	7.96	12.53	9.04	7.74	7.9	6.46	6.28	6.58	9.95	8.43	8.04	7.6	9.69	7.23	8.09	10.87	6.64	75	83	72	48	121	151	133	95	104	101	94	118	112	78	136	115	108	86	73
LOC105222370	23.29	24.07	22.54	21.28	23.41	14.31	11.01	16.66	16.04	14.7	22.54	25.16	25.75	21.6	26.78	17.4	17.08	16.4	18.83	17.78	20.71	21.6	24.83	25.47	24.79	16.86	18.26	12.8	10.99	15.77	1345	1803	1393	728	1410	1250	946	1334	1229	1139	1728	1991	1588	1400	1900	1444	1559	1164	1402
LOC105222371	2.81	2.84	2.61	3.3	2.77	3.05	2.67	2.64	2.94	3.1	2.67	3.06	2.3	2.76	2.72	2.64	2.69	2.64	2.47	2.69	2.89	2.61	2.85	2.75	2.65	2.73	2.97	2.4	1.96	2.39	252	332	256	177	267	427	360	338	356	381	329	375	223	280	305	347	388	296	288
LOC105222372	16.13	15.97	16.57	14.52	17.7	11.03	10.43	10.75	11.55	11.34	17.94	19.25	17.53	19.43	17.61	12.29	12.12	13.07	11.86	12.18	15.73	20.01	17.64	17.47	19.86	12.77	12.63	9.62	10.29	12.77	506	653	568	275	597	541	492	481	490	488	772	825	593	689	692	560	612	515	485
LOC105222373	94.83	90.02	93.18	76.69	78.18	88.36	81.55	100.35	83.61	84.22	77.23	75.62	67.53	87.31	74.96	64.23	68.51	70.69	61.09	69.38	88.54	77.04	82.54	75.36	67.28	66.63	75.15	77.9	76.21	72.1	1409	1739	1515	687	1248	2072	1831	2132	1692	1728	1574	1538	1083	1463	1393	1416	1652	1321	1189
LOC105222374	1.51	0.58	1.21	0.94	0.7	3.25	0.25	1.32	0.7	1.24	1.51	0.69	1.22	0	1.21	0.39	1.76	1.65	1.74	1.51	0.9	1.89	1.49	0.84	0.63	1.45	3.04	0.45	0.83	0.54	8	4	7	3	4	27	2	10	5	9	11	5	7	0	8	3	15	11	12
LOC105222375	7.32	12.02	17.09	10.78	13.47	21.04	18.18	14.87	14.52	17.35	13.73	12.3	12.52	18.15	15.89	15.63	19.65	23.38	16.73	15.99	15.22	16.73	18.75	16.09	21.66	15.01	19.66	24.5	16.46	21.96	206	432	508	178	408	892	754	579	557	665	512	470	364	562	540	645	898	811	614
LOC105222376	11.71	11.33	16.34	11.03	10.04	8.3	10.35	12.27	12.61	9.2	10.97	10.71	9.72	9.01	12.31	12.07	12.63	9.88	11.66	10.17	9.34	10.96	9.16	11.86	13.56	11.99	10.65	10.32	9.14	12.15	322	406	491	183	297	358	428	481	469	347	414	403	289	280	424	487	559	341	418
LOC105222377	5.25	4.45	5.67	4.82	4.98	2.74	1.84	2.29	2.03	3.08	5.14	4.41	4.37	4.25	4.62	2.11	2.04	2.05	2.36	2.74	5.92	5.28	6.94	5.21	5.15	2.03	2.16	2.63	1.96	2.06	249	275	294	138	254	204	131	155	130	200	334	286	224	228	274	147	157	122	146
LOC105222379	1210.51	1222.78	1283.58	1258	1274.49	930.42	844.84	896.73	857.19	880.32	1286.52	1315.27	1303.58	1272.1	1386.54	725.16	762.93	765.62	759.62	790.19	1270.03	1264.94	1318.29	1213.49	1180.75	711.81	758.26	869.08	862.55	772.37	17461	22986	20236	10953	19770	21043	18320	18446	16717	17419	25460	25966	20331	20737	25048	15352	17716	13867	14283
LOC105222380	62.73	73.33	66.09	59.74	74.48	74.84	81.91	76.54	73.92	76.2	72.43	76.15	68.43	61.27	62.35	81.35	75.94	73.98	80.64	80.55	63.69	65.84	63.57	66.79	67.5	78.8	90.51	72.16	76.66	85.72	1868	2845	2170	1085	2400	3522	3683	3273	2988	3118	2923	3131	2211	2061	2352	3578	3668	2784	3156
LOC105222381	12.08	13.46	21.49	24.43	20.57	10.49	8.31	10.92	9.24	11.7	20.8	17.11	19.19	14.02	20.93	7.49	7.85	9.51	9.32	8.83	15.99	13.23	18.12	15.56	19.29	7.36	8.84	10.76	8.43	7.34	177	257	344	216	324	241	183	228	183	235	418	343	304	232	384	161	185	175	178
LOC105222382	89.8	99.76	91.65	99.52	106.29	124.15	109.28	103.22	112.51	104.12	93.37	110.9	100.77	92.69	108.6	89.22	86.01	90.42	89.15	109.92	92.3	102.86	102.54	100.4	105.1	97.92	108.18	97.89	115.6	84.05	1646	2383	1836	1101	2095	3568	3011	2698	2788	2618	2348	2782	1997	1920	2493	2400	2538	2081	2130
LOC105222383	0.22	0.15	0.07	0	0.45	0.19	0.07	0.29	0.05	0.22	0.03	0.14	0.14	0.2	0.19	0.2	0.14	0.15	0.14	0.3	0.47	0.1	0	0.04	0.08	0.2	0.28	0.09	0.11	0.38	6	5	2	0	13	8	3	11	2	8	1	5	4	6	6	8	6	5	5
LOC105222384	23.41	25.08	23.38	18.73	23.31	21.01	21.64	22.27	24.37	19.87	23.36	26.76	27.47	22.46	25.11	24.57	22.5	20.92	22.41	25.57	22.3	22.89	26.56	23.38	23.75	20.54	28.06	21.04	20.89	24.46	1835	2563	2003	887	1973	2597	2552	2504	2589	2144	2510	2877	2339	1998	2463	2835	2840	2068	2298
LOC105222385	0.04	0.06	0.07	0	0.15	0	0	0	0	0	17.14	0.03	15.94	0.03	0.09	17.2	0.02	0.03	6.49	0.03	0.14	0.1	0.04	0	16.64	25.62	0.07	0	0	0.11	1	2	2	0	4	0	0	0	0	0	600	1	438	1	3	645	1	1	217
LOC105222386	0.77	0.43	0.44	0.62	0.62	0.48	0.37	0.44	0.52	0.52	2.53	0.66	2.61	0.88	0.88	2.21	0.72	0.55	1.33	0.63	0.67	0.96	0.67	0.65	1.93	3.41	0.57	0.56	0.36	0.79	70	51	44	34	61	69	51	57	64	65	318	84	259	91	101	298	105	63	160
LOC105222387	49.91	38.88	51.13	58.55	46.08	5.26	2.61	3.82	1.77	5.46	53.05	74.86	63.48	55.4	74.7	2.39	3.02	2.56	3.01	3.74	61.84	69.13	51.14	68.09	54.37	3.38	3.27	4.34	2.56	3.06	853	866	955	604	847	141	67	93	41	128	1244	1751	1173	1070	1599	60	83	55	67
LOC105222388	0	0	0	0	0	0	0	0	0	0	0	0	0	0	0	0	0	0	0.03	0	0	0	0	0	0	0	0	0	0	0	0	0	0	0	0	0	0	0	0	0	0	0	0	0	0	0	0	0	1
LOC105222389	0	0	0	0	0	0	0	0	0.08	0	0	0	0	0	0	0	0	0.18	0	0	0	0	0	0	0	0	0	0	0	0.27	0	0	0	0	0	0	0	0	1	0	0	0	0	0	0	0	0	2	0
LOC105222390	0.4	0	0.25	0	0	0	0	0.09	0	0	0	0	0	0	0	0.28	0	0	0.1	0	0	0	0	0.24	0	0	0	0	0	0	3	0	2	0	0	0	0	1	0	0	0	0	0	0	0	3	0	0	1
LOC105222391	2.89	4.13	3.32	2.41	3.43	3.03	4.15	3.59	3.7	3.35	3.97	4.04	4.39	3.64	2.51	3.45	3.41	3.88	3.2	2.85	3.21	3.01	3.61	4.13	4.14	3.3	3.59	2.81	2.94	4.38	137	255	172	69	175	225	296	243	237	218	258	262	225	195	149	240	260	231	198
LOC105222392	16.44	12.26	13.3	11.91	13.95	10.71	11.62	12.57	12.08	13.78	14.98	14.45	14.21	12.55	14.07	13.9	13.18	10.8	14.03	12.83	12.15	11.11	13.17	14.37	13.6	14.84	14.18	12.92	11.33	13.95	320	311	283	140	292	327	340	349	318	368	400	385	299	276	343	397	413	264	356
LOC105222393	6.2	6.1	6.1	4.61	5.66	5.48	5.31	7.26	6.37	5.99	6.03	5.06	7.08	5.88	5.94	11.34	10.28	11.83	14.49	9.84	3.88	4.33	5.46	8.72	10.18	13.36	9.98	6.09	5.63	9.14	281	360	302	126	276	389	362	469	390	372	375	314	347	301	337	754	750	673	856
LOC105222395	1.45	1.13	1.25	1.85	1.84	2.45	0.45	1.56	1.8	1.53	2.22	1.77	2.55	2.18	2.65	3.45	2.34	1.79	2.53	2.92	1.2	3.13	2.03	2.27	3.05	2.75	2.69	1.69	1.18	1.59	69	70	65	53	94	183	32	106	116	100	145	115	131	117	158	241	179	107	157
LOC105222396	903.06	964.38	812.84	815.06	844.5	591.78	681.75	645.2	717.11	646.01	893.71	1034.69	908.89	954.67	1108.85	742.39	704.54	708.17	750.36	764.14	848.73	937.09	810.96	1141.42	909.39	645.16	758.62	683.7	722.36	826.85	18087	25171	17793	9853	18189	18582	20525	18427	19417	17747	24558	28362	19682	21608	27813	21821	22714	17807	19589
LOC105222397	5.29	5.18	4.98	4.68	4.72	5.68	7.04	5.69	5.93	5.11	5	5.2	5.08	4.63	4.68	5.53	4.91	5.13	4.38	3.65	4.61	6.02	5.77	5.38	5.44	6.57	4.57	5.37	4.17	4.82	101	129	104	54	97	170	202	155	153	134	131	136	105	100	112	155	151	123	109
LOC105222398	0	0	0	0	0	0.24	0	0.13	0	0	0.27	0	0	0.16	0	0.51	0	0	0.14	0	0	0	0	0	1.87	0.29	0.16	0	0.27	0	0	0	0	0	0	2	0	1	0	0	2	0	0	1	0	4	0	0	1
LOC105222399	105.37	93.45	100.36	91.99	87.43	73.28	76.64	74.47	81.18	83.16	93.02	84.23	82.48	87.55	88.91	66.49	72.69	74.82	72.02	73.29	83.37	95.62	81.85	83.36	80.59	70.22	70.13	78.66	78.23	68.24	1393	1610	1450	734	1243	1519	1523	1404	1451	1508	1687	1524	1179	1308	1472	1290	1547	1242	1241
LOC105222400	57.03	56.71	53.73	53.33	59.58	43.86	42.83	42.12	43.84	46.07	60.11	61.56	65.84	53.87	60.19	44.9	47.39	44.26	47.06	46.63	60.89	60.21	61.94	65.6	64.06	45.13	46.11	40.21	38.2	41.92	1966	2548	2018	1108	2207	2371	2232	2081	2049	2195	2827	2893	2452	2098	2595	2272	2637	1924	2117
LOC105222401	0	0	0	0	0	0	0	0.04	0	0.04	0.04	0.04	0	0.05	0.04	0.14	0	0	0	0	0	0.13	0	0	0.18	0	0	0.04	0.04	0	0	0	0	0	0	0	0	1	0	1	1	1	0	1	1	4	0	0	0
LOC105222402	11.96	11.1	12.41	8.76	11.06	12.6	10.55	12.87	10.85	12.37	10.7	9.25	15.56	10.03	10.61	10.66	12.74	12.24	10.99	11.16	11.82	10	12.52	13.74	13.44	12.48	12.95	10.47	10.56	9.76	172	208	195	76	171	284	228	264	211	244	211	182	242	163	191	225	295	221	206
LOC105222404	2.71	1.62	2.14	1.88	1.95	2.79	3.77	4.09	3.77	4.07	3.79	4.52	3.08	4.17	1.8	4.38	2.86	5.85	3.7	4.08	3.3	3	4.52	4.53	3.85	3.1	2.57	5.37	3.41	2.82	30.32	23.59	26.15	12.7	23.49	49.02	63.47	65.33	57.04	62.44	58.14	69.21	37.32	52.71	25.25	71.94	51.55	82.22	53.91
LOC105222405	37.16	44.33	44.74	51.24	49.86	66.24	72.78	69.68	68.19	67.87	44.52	44.22	39.27	44.88	42.41	73.38	76.99	74.65	72.33	79.21	37.4	36.12	41.19	37.52	36.25	57.09	75.59	81.41	77.8	80.51	1139	1777	1502	946	1650	3178	3352	3044	2826	2860	1876	1859	1305	1555	1637	3310	3800	2882	2890
LOC105222406	0.02	0	0	0	0.06	0.01	0	0	0	0	0	0	0	0.04	0	0	0.01	0.02	0.1	0.02	0	0	0	0.04	0.09	0.08	0.07	0	0	0.08	1	0	0	0	3	1	0	0	0	0	0	0	0	2	0	0	1	1	6
LOC105222407	0.28	0.27	0.88	0.49	0.6	0.8	1.17	1	0.86	1.07	0.37	0.59	0.7	1.01	0.32	0.96	0.85	0.44	0.87	1.68	0.72	1.13	0.97	0.45	0.37	0.97	1.02	1.57	1.86	1.01	4	7	19	5	10	25	35	26	23	29	10	16	14	21	8	28	27	11	20
LOC105222408	5.76	6.48	5.45	4.75	6.03	5.93	3.6	4.89	5.47	5.18	5.77	6.09	6.08	6.42	6.91	4.26	4.7	4.05	4.55	4.84	5.82	6.66	6.28	6.14	6.09	4.37	5.65	4.26	3.12	4.29	513	751	530	255	577	827	481	621	658	632	705	742	585	646	770	557	673	453	528
LOC105222409	2.5	2.86	2.37	2.26	2.59	2.17	2.89	1.41	2.5	2.37	2.65	2.84	2.19	2.04	3.11	1.99	1.67	2.33	2.49	2.29	2.58	2.15	2.48	2.64	2.1	2.1	2.11	1.64	1.99	1.89	77	115	80	42	86	105	134	62	104	100	112	120	73	71	120	90	83	90	100
LOC105222410	0.96	0.81	0.94	1.34	1.25	1.31	1.1	1.67	1.42	1.2	0.53	0.66	0.92	0.85	0.86	1.52	2.1	2.08	2.12	1.51	0.71	0.56	0.56	1.34	1.21	1.24	1.63	1.65	1.09	2.32	77	85	82	65	108	164	133	191	154	132	58	72	80	77	86	179	271	209	221
LOC105222411	22.61	19.74	17.4	16.73	19.09	15.85	18.21	18.44	20.94	19.66	14.45	16.59	15.02	19.24	15.62	16.8	18.94	20.89	21.39	19.44	17.95	17.15	16.79	21.29	16.9	18.5	20.48	18.72	18.16	20.73	674	767	567	301	612	741	816	784	844	804	591	677	484	648	583	735	909	782	831
LOC105222412	0.16	0	0.39	0	0.11	0.23	0.08	0.47	0.17	0.15	0.06	0.31	0.11	0.14	0.19	0.53	0.58	0.48	0.5	0.39	0	0	0.04	0.12	0.07	0.49	0.14	0.16	0.18	0.11	4	0	13	0	3	11	3	18	7	6	2	13	3	4	6	24	26	16	18
LOC105222413	0	0.05	0.06	0	0.06	0.08	0	0	0	0.05	15.95	0	21.28	0.12	0	16.76	0	0.05	5.82	0.14	0	0	0	0	17.82	19.21	0	0	0	0	0	1	1	0	1	2	0	0	0	1	329	0	346	2	0	370	0	1	114
LOC105222414	10.72	9.69	9.59	9.21	9.08	9.98	10.51	8.35	9.4	11.29	9.9	11.02	9.4	8.99	8.5	9.25	10.11	9.93	9.99	9.86	7.08	9.73	9.91	9.86	8.51	11.07	11.09	10.77	8.87	9.36	135	159	132	70	123	197	199	150	160	195	171	190	128	128	134	171	205	157	164
LOC105222415	30.45	28.06	30.32	36.6	35.95	34.18	24.92	26.22	27	24.1	31.28	29.94	30.37	36.06	37.66	23.95	24.57	20.8	25.71	25.21	30.61	35.55	37.61	38.69	34.84	21.68	24.52	27.42	28.35	21.38	408	490	444	296	518	718	502	501	489	443	575	549	440	546	632	471	530	350	449
LOC105222416	5.83	6.15	6.56	6.83	5.23	6.51	7.25	7.83	9.46	8.33	5.49	7.01	4.96	3.62	5.46	6.76	5.73	8.05	6.93	8.37	5.14	3.36	4.34	2.75	4.97	7.18	7.45	9	7.74	9.04	178	245	219	126	172	312	333	341	391	349	230	293	164	125	209	303	282	309	276
LOC105222418	2.32	3.09	2.1	2.62	2.99	1.42	1.7	1.47	2.32	2.16	4.5	2.7	4.93	2.55	2.51	3.56	1.7	1.52	2.23	2.39	2.43	2.39	2.38	2.46	4.5	4.5	1.79	1.93	1.45	2.44	91	158	90	62	126	87	100	82	123	116	242	145	209	113	123	205	107	75	114
LOC105222419	0	0	0	0	0	0	0	0	0	0	0	0	0.48	0	0.1	0	0	0	0	0	0	0	0	0	0	0	0	0	0	0	0	0	0	0	0	0	0	0	0	0	0	0	4	0	1	0	0	0	0
LOC105222420	11.79	13.17	12.59	10.91	14.49	12.83	13.01	11.62	11.4	11.45	14.05	13.72	12.78	11.87	13.15	12.5	11.13	12.06	10.81	11.37	12.35	12.47	12.78	11.64	12.19	12.3	12.42	11.73	10.69	11.53	583	847	678	330	771	996	971	815	769	777	951	923	685	667	810	913	894	748	705
LOC105222421	40.23	42.43	47.19	51.15	48.95	37.91	39.12	35.45	36.7	37.69	52.41	44.16	50.02	40.7	45.17	38.12	33.31	36.5	33.42	35.17	42.26	42.32	38.9	43.19	47.86	43.78	30.46	41.03	36.87	33.98	646	882	825	493	843	953	941	811	794	830	1150	968	868	739	906	896	859	735	700
LOC105222422	0	0.15	0.13	0.35	0.06	0.09	0	0.05	0.26	0.35	0.41	0.1	0.13	0.25	0.05	0.38	0.13	0.06	0.05	0.05	0.17	0	0	0.06	0.07	0.32	0.16	0	0	0.16	0	3	2	3	1	2	0	1	5	7	8	2	2	4	1	8	3	1	1
LOC105222423	0.1	0	0	0	0	0.03	0.1	0	0.07	0.18	10.16	0	9.94	0	0.04	11.53	0	0	2.64	0	0	0	0	0	8.43	13.9	0	0	0.11	0	2	0	0	0	0	1	3	0	2	5	275	0	212	0	1	334	0	0	68
LOC105222424	5.07	4.71	5.25	5.62	5.21	4.84	3.81	4.8	5.2	4.84	7.62	5.02	8.25	4.28	4.62	8.24	5.11	5.02	6.88	6.18	4.22	5.3	5.66	4.94	7.02	10.43	6	5.2	4.99	5.46	194	244	220	128	216	282	214	254	270	248	397	268	335	193	229	455	311	240	341
LOC105222425	19.43	18.71	24.27	15.09	16.7	17.43	21.84	19.26	20.81	26.37	19.53	16.35	19.46	15.65	18.08	21.18	19.81	23.26	19.02	20.15	20.87	17.25	22.15	22.16	18.85	18.17	23.82	24.51	22.7	22.82	145	182	198	68	134	204	245	205	210	270	200	167	157	132	169	232	238	218	185
LOC105222426	8.44	9.11	7.93	7.62	8.06	8.88	8.86	8.56	8.31	8.92	9.57	8.59	8.78	7.81	9.17	8.65	8.21	8.67	7.81	9	9.44	7.81	7.62	8.26	8.61	8.47	8.77	7.41	8.27	7.75	369	519	379	201	379	609	582	534	491	535	574	514	415	386	502	555	578	476	445
LOC105222427	28.84	27.85	31.36	31.14	30.15	39.9	31.07	33.08	36.46	33.78	24.98	24.1	22.75	30.16	29.13	29.94	31.53	31.7	27.7	31.72	25.41	25.11	31.4	27.75	21.81	26.19	29.01	35.44	37.07	34.03	313	394	372	204	352	679	507	512	535	503	372	358	267	370	396	477	551	432	392
LOC105222428	2.04	1.58	1.77	1.53	1.52	1.13	1.26	1.37	1.32	1.32	1.79	1.93	1.75	1.56	1.24	1.42	1.33	1.21	1.1	1.14	2.12	1.39	2.32	1.8	1.71	1.21	1.05	1.11	1.32	1.25	97	98	92	44	78	84	90	93	85	86	117	126	90	84	74	99	102	72	68
LOC105222429	13.46	12.14	13	10.39	14.3	8.95	10.54	10.57	10.84	11.28	13	13.12	12.87	12.66	12.14	10.91	10.72	10.62	12.16	11.02	10.05	15.69	12.22	15.05	13.87	11.84	11.08	9.15	7.82	10.76	543	638	573	253	620	566	639	608	591	624	719	724	561	577	613	646	696	538	639
LOC105222430	192.27	191.93	194.84	180.38	205.14	251.08	249.86	257.34	236.15	252.87	179.9	188.05	179.75	204.87	183.46	252.09	281.39	301.97	280.07	274.79	172.88	177.54	201.29	193.07	188.1	242.02	257.44	251.36	240.28	256.57	2616	3404	2892	1480	3005	5349	5104	4995	4343	4716	3356	3501	2644	3155	3126	5029	6156	5155	4957
LOC105222431	20.3	20.42	22.39	20.93	21.26	21.7	23.07	23.43	22.43	24.82	18.58	22.4	17.79	17.69	20.46	20.72	23.45	23.33	21.92	22.44	20.07	21.76	21.75	17.49	19.54	22.14	22.63	20.05	23.38	21.51	576	740	696	363	645	973	971	946	856	961	721	864	548	566	729	868	1060	828	820
LOC105222432	0	0.04	0.04	0	0	0.03	0.06	0	0.03	0	9.68	0	11.47	0.04	0	11.08	0	0.07	3.18	0	0	0	0	0	11.87	17.42	0.2	0.04	0.07	0.16	0	1	1	0	0	1	2	0	1	0	285	0	266	1	0	349	0	2	89
LOC105222433	9.33	8.58	8.5	7.63	9.5	6.92	7.96	6.18	7.86	6.53	9.02	7.09	7.49	7.27	7.33	7.52	6.28	6.45	6.61	6.88	7.6	8.04	9.74	6.61	9.79	5.12	6.76	6.77	6.11	6.82	251	301	250	124	275	292	322	237	286	241	333	261	218	221	247	297	272	218	232
LOC105222434	14.15	13.68	12.33	12.87	12.48	9.63	10.97	10.52	10.25	10.96	36.1	12.56	42.86	12.21	13.48	31	10.45	11.59	17.21	11.03	13.31	15.6	14.74	12.62	31.1	40.63	11.01	9.42	10.03	10.8	394	488	392	218	382	423	456	410	376	426	2293	511	2106	387	466	2172	459	416	923
LOC105222435	9.91	7.95	10.15	9.43	8.73	10.57	9.2	8.51	8.26	9.11	40.22	9.35	52.4	7.53	10.33	34.52	7.03	9.54	14.01	7.31	9.06	8.23	11.4	8.53	22.96	47	7.83	7.93	8.7	7.32	134	140	150	77	127	224	187	164	151	169	746	173	766	115	175	685	153	162	247
LOC105222436	119.66	89.32	138.49	138.54	89.59	176.06	131.16	138.96	153.5	122.31	114.33	75.61	61.97	83.43	72.76	192.18	180.99	110.52	135.62	98.1	72.28	118.1	93.48	100.72	122.89	198.69	111.9	157.74	162.19	111.27	1285.56	1250.52	1626.11	898.36	1035.01	2965.67	2118.23	2128.96	2229.62	1802.45	1685.07	1111.8	719.88	1012.9	978.89	3030.16	3130.18	1490.81	1899.25
LOC105222437	0.36	0.28	0.44	0.2	0	0.99	0.56	0.08	0	0	0	0.09	0	0	0.29	0.33	0.22	0	0.09	0.17	0	0	0	0.11	0	0.46	0	0.38	0	0	3	3	4	1	0	13	7	1	0	0	0	1	0	0	3	4	3	0	1
LOC105222438	0.44	0	0.11	0.1	0	0.08	0	0.13	0	0.05	0	0	0	0	0.05	0	0.04	0.05	0	0	0	0	0	0	0.07	0	0	0	0.23	0.11	7	0	2	1	0	2	0	3	0	1	0	0	0	0	1	0	1	1	0
LOC105222439	0.02	0.07	0.27	0.19	0.03	0.1	0.06	0.08	0.05	0.02	0.02	0.06	0.11	0.03	0.08	0.07	0.08	0.04	0.02	0.08	0.1	0.11	0.02	0.03	0.06	0.1	0.06	0.1	0.06	0.05	2	9	31	12	3	17	10	12	7	3	3	9	12	3	10	10	14	5	3
LOC105222440	46.79	48.12	45.13	42.59	43.21	33.33	34.59	40.56	40.97	37.48	41.86	46.74	41.87	47.51	44.31	37.18	39.46	35.48	38.1	38.5	40.87	45.4	47.54	48.8	45.2	34.81	39.35	33.51	30.48	36.02	2617	3508	2759	1438	2599	2923	2909	3235	3098	2876	3212	3578	2532	3003	3104	3052	3553	2492	2778
LOC105222441	5.06	4.99	4.78	4.23	4.27	4.44	4.77	4.94	4.99	4.31	4.9	5.46	4.68	4.96	4	4.13	4.75	4.47	3.94	3.78	6.02	4.64	5.27	5.24	5.18	3.55	4.21	4.1	3.8	4.34	214	275	221	108	194	294	303	298	285	250	284	316	214	237	212	256	323	237	217
LOC105222442	9	9.11	8.24	8.39	8.85	5.94	4.83	6.42	4.69	5.56	9.66	8.3	9.04	9.19	8.42	3.97	4.26	6.11	4.91	6.06	8.7	11.26	10.76	8.73	7.94	5.6	5.98	4.11	5.31	5.56	176	232	176	99	186	182	142	179	124	149	259	222	191	203	206	114	134	150	125
LOC105222443	21.28	18.87	20.77	19.55	23.27	20.55	19.23	20.33	21.25	21.23	22.2	22.63	21.11	22.03	21.53	19.14	19.1	19.9	18.37	21.68	20.59	20.95	22.67	20.1	22.75	20.04	17.91	21.9	21.99	18.11	494	571	527	274	581	748	671	673	667	676	707	719	530	578	626	652	714	580	556
LOC105222444	0	0.03	0.03	0	0.12	0.04	0	0.02	0	0.05	0.07	0.07	0.06	0.15	0.03	0.07	0.02	0.03	0	0.05	0	0.04	0	0.06	0.04	0	0	0	0.02	0.06	0	1	1	0	4	2	0	1	0	2	3	3	2	5	1	3	1	1	0
LOC105222445	0	0	0	0	0	0	0	0	0	0	0	0	0	0	0	0	0	0	0	0	0	0	0	0	0	0	0	0	0	0	0	0	0	0	0	0	0	0	0	0	0	0	0	0	0	0	0	0	0
LOC105222446	5.23	4.89	4.87	5.05	5.33	4.16	2.89	4.32	4.28	4.08	4.9	4.91	5.19	6.14	4.9	4.04	4.44	4.5	5.43	4.56	4.45	6.78	5.57	5.94	6.5	4.22	4.37	2.7	2.73	4.17	544	663	553	317	596	678	451	641	602	582	699	699	583	721	638	617	743	587	736
LOC105222447	3.16	5.64	6.37	5.5	2.68	9.86	8.83	6.95	6.8	5.99	3.65	3.7	3.07	3.37	3.04	7.6	19	4.12	8.64	8.62	2.39	5.04	1.35	6.62	2.31	8.76	5.53	5.66	7.04	8.61	58	135	128	61	53	284	244	182	169	151	92	93	61	70	70	205	562	95	207
LOC105222448	0.5	0.29	0.22	0.24	0.11	0.26	0.51	0.08	0.24	0.24	0.13	0.3	0.22	0.21	0.14	0.42	0.27	0.14	0.16	0.3	0.14	0.44	0.2	0.13	0.13	0.38	0.27	0.23	0.09	0.19	17	13	8	5	4	14	26	4	11	11	6	14	8	8	6	21	15	6	7
LOC105222449	5.48	5.26	5.11	5.5	6.23	4.98	5.19	3.53	4.79	5.53	4.72	4.65	4.61	4.5	4.24	4.6	4.64	4.23	4.46	6.71	4.93	3.46	4.48	4.15	4.08	4.86	3.56	5.98	4.45	5.28	99	124	101	60	121	141	141	91	117	137	117	115	90	92	96	122	135	96	105
LOC105222450	33.98	30.47	28.66	29.72	28.79	23.84	21.44	29.53	32.89	29.75	29.85	31.24	34.65	33.91	26.05	37.23	43.98	37.12	43.58	37.68	17.15	35.01	27.08	38.71	42.54	48.76	38.11	30.03	23.03	45.1	1472	1720	1357	777	1341	1619	1396	1824	1926	1768	1774	1852	1623	1660	1413	2367	3067	2019	2461
LOC105222451	7.05	8.85	7.68	7.52	8.77	6.41	6.87	8.1	7.99	7.54	8.55	8.85	9.41	7.38	7.94	7.75	9.19	6.59	8.39	8.43	5.76	9.15	9.13	9.59	10.63	8.57	6.45	6.23	5.28	7.82	126	205	147	80	163	177	182	205	193	186	206	216	177	146	178	203	265	146	195
LOC105222452	222.83	239.77	242.1	255.39	221.31	298.46	279.85	281.76	277.41	270.59	235.88	192.79	207.74	231.51	222.68	277.22	264.1	274.55	267.77	258.16	242.66	203.88	225.73	224.15	224.12	260.74	263.54	317.35	312.91	259.55	1499	2102	1780	1037	1601	3148	2830	2703	2523	2497	2177	1775	1511	1760	1876	2737	2860	2319	2348
LOC105222453	3.24	3.13	3.07	2.54	2.96	2.24	1.75	1.99	1.54	1.33	2.96	2.75	3.83	1.95	3.21	2.43	1.71	2.12	2.07	1.91	2.82	2.46	2.83	1.81	2.98	1.52	1.79	1.69	1.5	1.52	112	141	116	53	110	121	91	98	72	63	140	130	143	76	139	123	95	92	93
LOC105222454	100.22	171.72	140.11	122.21	171.24	8.88	0.88	11.43	1.53	8.29	195.16	212.61	263.4	226.53	257.1	5.48	3.48	4.21	5.4	4.38	230.51	199.6	186.71	278.1	183.31	2.24	3.67	5.26	1.78	2.5	1894	4229	2894	1394	3480	263	25	308	39	215	5060	5499	5382	4838	6085	152	106	100	133
LOC105222455	13.71	11.14	9.86	9.59	8.66	7.99	6.78	7.3	9.76	6.14	10.52	8.84	11.25	13.62	12.64	9.49	6.92	11.38	8.77	9.58	8.8	11.55	16.41	14.67	14.08	9.15	7.76	8.84	7.76	9.07	187	198	147	79	127	171	139	142	180	115	197	165	166	210	216	190	152	195	156
LOC105222456	1.52	1.36	1.86	0.84	1.77	0.81	1.6	1.34	0.94	0.74	1.11	0.74	1.64	0.34	2.33	1.82	1.66	1.01	0.97	0.46	2.26	1.75	1.57	1.13	1.7	0.49	1.18	1.4	1.3	0.8	12	14	16	4	15	10	19	15	10	8	12	8	14	3	23	21	21	10	10
LOC105222457	6.21	6.77	7.02	9.15	6.42	7.87	7.96	8.01	7.43	6.37	7.82	6.27	7.02	7.87	7.78	5.12	5.81	7.51	6.65	8.3	7.84	7	7.24	7.26	8.91	7.09	5.84	7.19	7.62	5.78	81	115	100	72	90	161	156	149	131	114	140	112	99	116	127	98	122	123	113
LOC105222458	17.28	17.47	18.47	16.46	18.73	17.9	16.45	16.68	17.54	16.77	18.8	16.67	18.52	17.75	19.47	16.8	16.95	15.57	15.24	14.97	19.42	17.92	17.14	16.88	15.7	15.49	16.22	16.22	15.14	14.91	440	580	514	253	513	715	630	606	604	586	657	581	510	511	621	628	695	498	506
LOC105222459	14.41	14.44	14.54	15.49	14.13	14.81	16.35	18.28	15.29	16.48	22.51	10.86	22.77	12.53	12.86	20.37	17.57	16.17	19.36	15.16	13.17	13.59	15.14	13.4	19.68	27.69	16.91	16.17	15.82	17.58	350	457	386	227	369	564	597	633	502	549	750	361	598	344	391	726	687	493	613
LOC105222460	0.76	0.81	0.62	0.75	1.34	1.21	1.92	1.38	2.41	1.44	0.83	2.05	1.33	1.01	1.09	1.45	1.37	1.15	1.98	1.76	0.99	1.23	1.11	1.63	1.86	1.34	1.99	1.26	2.38	1.31	10	14	9	6	19	25	38	26	43	26	15	37	19	15	18	28	29	19	34
LOC105222461	16.45	23.15	34.19	13.35	14.5	9.51	13.4	9.67	7.8	11.31	18.55	11.83	25.36	13.42	7.8	20.9	10.33	10.51	12.82	10.89	23.13	17.46	23.42	16.31	31.2	20.66	7.91	13.24	14.27	9.76	192	352	436	94	182	174	235	161	123	181	297	189	320	177	114	358	194	154	195
LOC105222462	0.16	0.49	0.44	0.53	0.52	0.2	0.53	0.39	0.18	0.52	0.23	0.23	0.29	0.07	0.19	0.49	0.25	0.38	0.12	0.4	0.19	0.7	0.72	0	0.36	0.37	0.07	0.44	0.17	0.37	2	8	6	4	7	4	10	7	3	9	4	4	4	1	3	9	5	6	2
LOC105222463	2.63	4.79	10.03	3.09	4.38	1.05	1.46	1.46	0.89	1.76	6.95	3.2	5.37	1.65	0.52	9.03	0.68	1.31	3.87	1.03	3.65	4.52	5.3	3.04	12.6	7.85	0.74	1.04	2.08	0.69	24	57	100	17	43	15	20	19	11	22	87	40	53	17	6	121	10	15	46
LOC105222464	33.19	47.73	78.5	45.26	47.35	32.04	28.69	23.91	27.05	28.23	32.67	24.09	59.1	24.37	28.4	32.15	27.28	21.58	25.29	26.65	46.04	49.4	108.7	30.47	62.53	33.66	21.79	27.5	32.57	26.43	294	551	760	242	451	445	382	302	324	343	397	292	566	244	315	418	389	240	292
LOC105222465	0.58	0.4	0.43	0.28	0.34	1.11	1.35	1.03	1.19	0.87	0.55	0.38	0.9	0.56	0.46	0.51	0.55	0.49	1.06	0.44	0.82	0.69	0.69	0.57	0.77	0.94	1.01	0.7	1.03	0.88	21	19	17	6	13	63	73	53	58	43	27	19	35	23	21	27	32	22	50
LOC105222466	7.25	6.19	6.45	8.46	5.22	15.43	28.52	20.62	24.39	29.25	8.78	5.82	6.8	7.5	5.38	15.51	16.36	17.24	14.1	15.65	11.53	17.74	10.91	7.94	6.61	19.35	13.66	24.95	21.4	15.45	71	79	69	50	55	237	420	288	323	393	118	78	72	83	66	223	258	212	180
LOC105222467	0.67	1.89	3.28	2.04	3.13	3.01	3.51	4.25	4.07	4.17	2.04	3.52	2.18	1.69	1.79	2.98	2.23	2.95	3.36	2.69	2.13	2.95	3.53	3.61	3.13	3.54	1.8	4.42	5.49	3.49	6	22	32	11	30	42	47	54	49	51	25	43	21	17	20	39	32	33	39
LOC105222468	3.73	5.15	6.14	4.95	10.58	7.14	8.31	7.85	7.11	8.09	4.56	7.16	6.56	5.61	5.66	6.36	5.21	7.13	7.08	6.77	6.32	9.45	7.97	7.25	6.35	8.55	4.58	8.53	8.86	6.28	40	72	72	32	122	120	134	120	103	119	67	105	76	68	76	100	90	96	99
LOC105222469	0.1	0.15	0.45	0.16	0	0.19	0.2	0.07	0.22	0.14	0.07	0.29	0.46	0	0.08	0.27	0.55	0.16	0.23	0.14	0	0.12	0.56	0.44	0.55	0.38	0.08	0.47	0	0	1	2	5	1	0	3	3	1	3	2	1	4	5	0	1	4	9	2	3
LOC105222470	14.7	10.77	12.23	10.9	12.61	11.22	12.33	10.64	12.91	12.29	9.3	10.11	13.97	12.48	10.78	13.59	11.35	12.25	10.46	12	14.37	10.24	11.71	9.48	9.97	11.12	10.69	13.07	11.28	10.2	219	209	199	98	202	262	276	226	260	251	190	206	225	210	201	297	272	229	203
LOC105222471	0.48	0.59	0.77	0.18	0.58	0.47	0.49	0.77	0.49	0.32	1.71	0.67	0.98	0.81	0.35	1.45	0.55	0.64	0.62	0.35	0.48	0.41	0.66	0.43	1.56	1.72	0.37	0.23	0.46	0.38	13	21	23	3	17	20	20	30	18	12	64	25	29	25	12	58	24	22	22
LOC105222472	5.53	4.76	4.23	5.25	6.07	3.65	1.43	4.97	5.15	4.92	4.97	5.71	4.75	7.3	6.24	5.75	7.02	6.14	7.42	8.12	5.27	5.64	4.96	7.9	6.66	4.59	6.32	4.36	3.9	5.64	206	231	172	118	243	213	80	264	259	251	254	291	191	307	291	314	421	287	360
LOC105222473	0	0	0	0	0	0.03	0	0	0	0	3.03	0	2.63	0	0.03	2.23	0.03	0	1.76	0	0	0	0	0	3.13	4.15	0	0	0	0	0	0	0	0	0	1	0	0	0	0	98	0	67	0	1	77	1	0	54
LOC105222476	0	0	0	0	0.05	0	0	0	0	0	0.04	0	0.05	0.05	0	0	0	0	0	0	0.12	0	0.06	0.27	0.06	0	0	0	0	0	0	0	0	0	1	0	0	0	0	0	1	0	1	1	0	0	0	0	0
LOC105222477	5.93	5.91	8.95	6.11	3.21	3.94	1.81	2.31	2.02	1.52	3.86	6.39	5.26	3.55	1.73	1.69	1.64	1.34	1.41	0.29	6.96	5.31	1.71	3.73	5.73	0.25	1.15	3.03	1.87	1.38	74	96	122	46	43	77	34	41	34	26	66	109	71	50	27	31	33	21	23
LOC105222478	1.16	0.93	1.45	1.16	1.15	0.82	0.45	0.92	0.89	0.68	1.32	1.09	1.19	1.01	1.42	1.12	0.92	1.09	1.14	1.57	1.15	1.45	1.49	1.77	1.24	1.07	0.89	0.9	0.84	1.02	71	74	97	43	76	79	41	80	74	57	111	91	79	70	109	101	91	84	91
LOC105222479	59.31	53.2	55.44	56.32	60.29	58.15	50.01	53.12	50.43	49.56	54.94	56.76	55.27	54.81	54.44	47.68	48.46	50.61	48.21	49.14	54.55	52.62	53.85	47.78	54.32	52.77	47.6	48.78	53.41	48.83	923	1079	943	529	1009	1419	1170	1179	1061	1058	1173	1209	930	964	1061	1089	1214	989	978
LOC105222480	9.62	11.06	9.15	10.02	10.48	10.91	9.93	9.86	11.17	9.86	10.84	10.21	10.36	10.12	8.52	10.76	9.29	10.08	11.62	10.55	8.28	9.13	10.6	9.03	10	8.92	9.95	12.15	11.78	10.64	213	307	215	130	237	365	314	316	338	291	318	292	250	242	227	343	319	269	339
LOC105222481	0.59	0.56	0.57	0.47	0.67	0.39	0.58	0.63	0.59	0.5	1.26	0.55	0.76	0.4	0.51	1.36	0.79	0.8	0.72	0.36	0.45	0.37	0.43	0.45	0.98	1.5	0.73	0.55	0.48	0.47	42	52	44	20	51	43	62	64	56	49	122	53	58	32	45	141	90	71	66
LOC105222482	89.74	81.08	78.82	75.14	106.11	112.17	92.64	82.06	95.68	87.72	76.73	111.9	95.03	80.95	100.5	89.46	66.72	81.83	93.5	106.86	75.97	106.12	92.52	94.88	117.24	95.08	115.69	86.44	111.65	79.5	924	1088	887	467	1175	1811	1434	1205	1332	1239	1084	1577	1058	942	1296	1352	1106	1058	1255
LOC105222483	40.46	37.61	36.4	36.15	34.65	40.52	48.74	43.49	50.66	45.28	31.81	34.77	35.24	32.53	33.24	46.66	43.12	43.65	43.27	51.76	34.33	30.85	33.89	38.41	32.15	43.19	48.75	46.32	44.26	51.09	482	584	474	260	444	757	873	739	816	740	520	567	454	438	496	816	827	653	672
LOC105222484	220.13	212.32	212.53	227.69	206.77	209.06	222.45	200.17	216.52	216.35	194.93	208.09	205.58	200.71	190.69	201.14	207.78	189.47	202.94	208.77	193.77	215.66	216.63	246.05	220.71	226.07	195.33	203.72	214.65	199.57	2662	3346	2809	1662	2689	3964	4044	3452	3540	3589	3234	3444	2688	2743	2888	3570	4045	2877	3199
LOC105222485	0.06	0.69	0.15	0.47	0.37	0.5	0.41	0.63	0.54	0.33	0.37	0.87	0.84	0.5	0.18	0.31	0.39	0.18	0.39	0.2	0.2	0.42	0.51	0.71	0.63	0.26	0.57	0.44	0.33	0.65	1	16	3	5	7	14	11	16	13	8	9	21	16	10	4	8	11	4	9
LOC105222486	31.13	29.9	27.54	28.66	33.25	24.82	26.38	24.89	22.58	22.51	29.72	30.99	31.19	28.43	33.77	21.65	23.37	24.04	23.75	20.79	28.53	31.03	30.11	29.76	29.89	24.18	25.08	23.21	24.51	20.6	720	901	696	400	827	900	917	821	706	714	943	981	780	743	978	735	870	698	716
LOC105222487	0.09	0.19	0.06	0.03	0.07	0.08	0.08	0.16	0.07	0.1	0.08	0.12	0.1	0.02	0.07	0.05	0.07	0.15	0.15	0.09	0.1	0.07	0.08	0	0.12	0.22	0.07	0.1	0.06	0.11	5	14	4	1	4	7	7	13	5	8	6	9	6	1	5	4	6	11	11
LOC105222488	1.22	0.53	1.12	1.62	1.29	0.49	0.92	0.77	0.72	0.8	1.01	0.86	1.09	0.79	1.53	0.89	0.71	1.01	1.09	0.77	0.63	1.07	1.6	1.16	1.77	1.19	0.9	0.74	0.86	0.54	30	17	30	24	34	19	34	27	24	27	34	29	29	22	47	32	28	31	35
LOC105222489	20.67	23.8	18.77	23.28	23.18	11.89	9.11	13.55	12.4	14.46	20.94	23.01	23.06	23.81	24	15.69	16.33	17.42	19.52	18.58	17.13	27.71	23.41	36.4	24.63	14.44	16.1	11.12	10.34	16.56	762	1143	756	518	919	687	505	712	618	731	1059	1161	919	992	1108	849	969	806	938
LOC105222490	3.67	3.56	3.36	3.68	2.87	2.59	2.89	2.71	2.86	2.68	3.24	3.11	2.77	2.39	2.7	2.11	1.98	2.46	2.67	2.46	4.71	1.69	2.61	3.45	2.48	2.31	1.88	3.12	2.4	2.11	38	48	38	23	32	42	45	40	40	38	46	44	31	28	35	32	33	32	36
LOC105222491	11.86	9.68	10.68	12.06	9.84	9.03	9.34	10.77	10.99	10.64	9.36	12.07	9.96	10.3	11.24	11.94	12.94	11.81	14.92	12.46	8.08	13	12.12	14.23	13.41	12.46	11.35	7.96	8.72	12.61	316	336	311	194	282	377	374	409	396	389	342	440	287	310	375	467	555	395	518
LOC105222492	27.99	15.95	23.65	25.78	27.32	17.44	12.4	15.9	14.34	13.26	18.19	28.26	18.02	12.67	30.41	9.15	12.82	12.87	11.75	7.01	31.92	34.31	15.21	21.2	16.32	10.91	13.39	24.53	9.7	6.24	563	418	520	313	591	550	375	456	390	366	502	778	392	288	766	270	415	325	308
LOC105222493	15.42	15.5	15.8	17.24	16.19	13.01	13.75	17.4	15.37	14.64	15.42	17.29	15.81	15.99	16.09	17.52	19.28	18.87	19.52	20.01	12.23	17.59	17.12	21.59	20.25	17.54	16.64	13.52	13.6	15.14	535	701	599	361	604	708	717	861	721	697	734	821	593	627	699	892	1077	822	883
LOC105222494	6.85	6.72	6.91	5.86	5.66	2.05	2.96	2.81	2.57	2.64	6.09	5.83	6.7	4.13	6.13	3.39	2.85	2.44	3.73	2.27	5.02	6.3	6.13	6.31	6.43	3.87	2.25	1.81	1.54	2.56	420	537	463	217	373	197	273	246	213	222	512	489	444	286	471	305	281	188	298
LOC105222495	11.68	10.61	9.51	10.11	12.43	6.39	6.66	7.66	8.26	7.89	10.81	11.43	8.96	11.25	13.09	6.07	7.25	7.75	9.11	7.66	8.64	13.09	10.7	12.96	12.39	6.31	7.24	5.89	5.16	7.91	463	548	412	242	530	397	397	433	443	429	588	620	384	504	650	353	463	386	471
LOC105222497	0	0	0	0	0	0.05	0.11	0.03	0.1	0	0	0	0.08	0.19	0	0.06	0	0.07	0	0	0.05	0	0	0.12	0	0	0	0	0.03	0.12	0	0	0	0	0	2	4	1	3	0	0	0	2	5	0	2	0	2	0
LOC105222498	0	0.03	0	0	0	0	0.02	0	0.02	0	0	0	0	0	0	0	0.02	0	0.03	0	0	0	0	0	0	0	0	0	0	0	0	1	0	0	0	0	1	0	1	0	0	0	0	0	0	0	1	0	1
LOC105222499	34.84	42.91	30.05	24.67	28.95	28.15	39.86	37.31	40.66	32.99	33.16	40.51	32.23	35.94	35.62	49.57	46.32	51.23	57.39	46.85	33.24	31.57	32.84	42.45	32.93	47.15	47.54	39.62	39.08	55.7	592	950	558	253	529	750	1018	904	934	769	773	942	592	690	758	1236	1267	1093	1271
LOC105222500	2.8	2.42	3.54	3.85	3.05	3.35	2.58	2.97	2.29	3.52	3.08	3.48	3.47	4.8	3.52	2.52	2.44	3.09	2.38	1.95	3.54	4.55	2.55	3.04	3.66	2.25	2.17	3.38	3.31	3.15	47	53	65	39	55	88	65	71	52	81	71	80	63	91	74	62	66	65	52
LOC105222501	0	0	0.14	0	0.28	0.29	0	0.11	0.22	0.11	3.31	0.22	3.08	0	0	4.12	0.09	0.24	1.39	0	0	0.19	0	0	7.26	8.62	0	0	0	0	0	0	1	0	2	3	0	1	2	1	30	2	22	0	0	40	1	2	12
LOC105222502	0.1	0.05	0.14	0	0.05	0.17	0	0.11	0.04	0.05	1.5	0.04	2.16	0.05	0	2.4	0.17	0.33	0.5	0	0.06	0	0	0.09	1.58	2.91	0	0.11	0.05	0.09	2	1	3	0	1	4	0	3	1	1	39	1	43	1	0	61	4	8	12
LOC105222503	18.16	17.71	16.51	15.73	14.41	12.77	12.58	15.47	14.6	15.31	15.99	15.69	12.86	15.35	12.59	11.85	13.95	12.09	13.32	13.59	16.63	15.51	15.53	16.56	15.7	12.89	14.03	12.35	11.22	14.61	1183	1500	1189	618	1004	1311	1233	1433	1288	1367	1426	1399	908	1134	1033	1138	1475	999	1132
LOC105222504	5.58	4.74	6.01	2.6	4.01	4.69	3.98	4.12	4.06	4	3.86	3.72	3.62	4.16	3.6	4	4.02	3.43	4.28	4.34	4.54	5.02	4.19	4.2	4.59	3.4	3.07	3.63	4.79	2.76	57	63	67	16	44	75	61	60	56	56	54	52	40	48	46	60	66	44	57
LOC105222506	7.9	8.51	10.93	8.07	11.3	9.71	10.42	8.92	7.57	10.65	9.63	13.63	9.88	8.62	10.42	11.4	9.35	8.86	11.3	11.86	8.22	9.46	8.93	9.11	9.73	14.84	13.16	10.93	12.37	9.77	193	271	292	119	297	372	383	311	250	357	323	456	261	238	319	409	368	272	360
LOC105222507	0.05	0.07	0.04	0.08	0.13	0	0.06	0.03	0.03	0.07	35.65	0	33.91	0.08	0.07	43.68	0.35	0.19	12.91	0.1	0.06	0	0	0	26.06	46.68	0.04	0.07	0	0.03	1	2	1	1	3	0	2	1	1	2	1046	0	784	2	2	1371	12	5	360
LOC105222508	10.97	10.46	9.27	8.84	10.01	10.28	10.9	9.53	10.76	10.87	10.52	10.5	10.67	11.58	10.19	11.66	11.61	12.38	13.03	12.65	10.19	10.84	11.58	12.15	11.34	11.82	11.75	8.14	8.25	10.02	539	670	498	262	529	792	805	668	715	733	709	706	567	643	627	841	918	764	835
LOC105222509	213.59	203.9	208.1	210.63	212.37	223.64	221.43	221.61	228.15	228.18	201.42	210.16	205.86	203.25	206.66	227.45	226.43	223.08	227.28	227.49	205.56	205.83	204.42	208.57	211.83	226.29	217	218.63	241.79	216.02	4084	5081	4349	2431	4367	6705	6365	6043	5898	5985	5284	5500	4256	4392	4949	6383	6970	5356	5665
LOC105222510	10.53	9.93	10.09	12.74	11.45	12.44	8.82	9.96	10.65	10.8	8.57	11.4	9.79	8.2	9.1	9.91	11.19	9.69	11.46	10.24	8.81	10.87	11.28	10.36	9.85	10.34	8.54	8.34	9.36	9.97	189	232	198	138	221	350	238	255	258	266	211	280	190	166	203	261	323	218	268
LOC105222511	3.22	2.7	3.1	3.01	2.43	3.08	2.4	2.98	2.1	2.88	3.93	2.23	2.16	2.8	2.44	2.12	2.61	2.45	2.05	2.51	3.24	2.71	2.88	2.14	2.74	2.4	1.69	3.24	2.11	1.98	58	63.2	61	33	47	87	65	77	52	71	97	55	42	57	55	56	76	57	48
LOC105222512	347.81	348.77	372.32	448.66	341.94	432.46	399.31	413.17	395.47	407.98	329.91	303.56	322.26	380.36	351.31	407.28	380.35	417.76	343.59	363.88	391.89	330.28	333.95	337.43	331.21	333.07	383.87	466.86	470.76	382.9	2200	2875	2574	1713	2326	4289	3797	3727	3382	3540	2863	2628	2204	2719	2783	3781	3873	3318	2833
LOC105222513	19.81	22.22	25.81	22.34	25.63	30	26.85	27.34	23.03	25.55	19.76	25.22	22.52	22.18	23.95	26.81	23.4	24.4	23.8	25.16	22.14	26.86	21.83	19.16	22.83	24.29	28.39	23.41	28.7	24.3	183	266.8	258	123	254	432	370	359	287	322	248	316	221	231	274	361	346	283	285
LOC105222514	37.97	35.59	32.11	34.26	40.22	38.45	40.45	36.45	34.42	33.44	39.19	39.03	35.5	36.87	37.16	29.05	29.42	31.34	29.84	33.35	38.61	40.74	36.42	35.73	37.07	32.69	32.84	32.44	33.69	28.13	740	904	684	403	843	1175	1185	1013	907	894	1048	1041	748	812	907	831	923	767	758
LOC105222515	5.88	5.43	6.04	4.42	7.18	1.25	1.02	0.76	1.72	1.38	6.37	7.83	7.85	7.26	8.15	1.64	0.97	1.06	1.23	1.07	7.22	6.37	5.68	7.83	6.39	1.67	2.27	1.49	1.14	1.16	121	145	136	55	159	41	31	22	48	39	180	221	174	169	211	49	32	27	33
LOC105222516	5.43	6.35	6.67	5.18	6.98	9.48	8.53	7.69	8.48	9.87	5.59	6.97	5.83	6.21	5.52	6.5	9.5	9.52	8.79	9.36	6.65	8.5	6.35	7.79	5.39	6.8	7.24	8.69	8.41	7.92	99	151	133	57	137	271	234	200	209	247	140	174	115	128	126	174	279	218	209
LOC105222518	0.15	0.47	0.21	0.26	0.22	0.49	0.31	0.54	0.34	0.85	0.51	0.34	0.21	0.14	0.37	0.21	0.24	0.74	0.65	0.17	0.09	0.58	0.43	0.28	0.35	0.83	0.46	0.55	0.68	0.22	2	8	3	2	3	10	6	10	6	15	9	6	3	2	6	4	5	12	11
LOC105222519	0.02	0.12	0.13	0.15	0.06	0.06	0	0.06	0.05	0	0.08	0.07	0.17	0.2	0.06	0.08	0.1	0.02	0.11	0.05	0	0.03	0	0	0.03	0.04	0	0.05	0.03	0.05	1	7	6	4	3	4	0	4	3	0	5	4	8	10	3	5	7	1	6
LOC105222520	0	0	0	0	0	0.04	0	0	0	0	0	0	0	0	0	0.04	0	0	0	0	0	0	0	0	0.14	0	0	0	0	0	0	0	0	0	0	1	0	0	0	0	0	0	0	0	0	1	0	0	0
LOC105222521	3.51	2.26	4.49	6.36	4.33	0.73	0.43	0.63	0.54	0.12	2.44	1.25	0.91	0.94	0.98	0.17	0.2	0.26	0	0	1.75	3.58	2.02	2.34	1.46	0.5	0.42	0.13	0.06	0.19	43	36	60	47	57	14	8	11	9	2	41	21	12	13	15	3	4	4	0
LOC105222522	2.14	1.82	1.36	1.42	1.49	1.04	2.62	1.67	3.43	1.39	0.82	0.88	1.15	1.59	1.62	2.02	2.47	2.51	2.3	1.67	2.5	0.63	0.96	1.18	1.61	2.85	1.65	2.15	2.45	2.29	55	61	38	22	41	42	101	61	119	49	29	31	32	46	52	76	102	81	77
LOC105222523	0.25	0.57	1.09	0.99	2.67	0.16	0.07	0.1	0.04	0	7.99	0.69	7.2	0.53	0.79	9.22	0.25	0.16	2.7	0.18	0.83	2.48	0.56	0.93	9.08	11.27	1.43	0.2	0.07	0.17	5	15	24	12	58	5	2	3	1	0	221	19	157	12	20	273	8	4	71
LOC105222524	0.06	0.19	0.23	0.1	0.23	0.12	0.12	0.22	0	0.05	0.05	0.73	0.12	0.06	0.25	0	0.12	0.25	0.19	0.05	0.22	0.47	0.56	0.22	0.28	0.14	0.16	0	0.05	0.04	1	4	4	1	4	3	3	5	0	1	1	16	2	1	5	0	3	5	4
LOC105222525	10.66	9.74	9.35	11.2	8.94	10.24	9.07	10.83	11.5	7.81	9.57	11.16	9.76	10.21	9.08	10.86	9.83	7.79	9.11	9.74	9.93	8.66	10.82	7.91	12.21	8.38	11.59	10.18	11.36	7.37	194	231	186	123	175	292	248	281	283	195	239	278	192	210	207	290	288	178	216
LOC105222526	41.26	45.99	46.77	49.97	45.11	43.41	47.89	48.31	45.47	49.87	44.83	38.45	45.05	40.81	44.65	49.49	44.9	43.69	46.56	46.43	47.77	48.9	48.36	40.13	49.65	47.21	45.49	51.09	47.39	50.14	1394.84	2036.34	1721.95	1021.36	1631.21	2298.02	2440.48	2328.27	2083.25	2318.51	2083.83	1778.16	1641.6	1559.06	1890.58	2459.16	2451.04	1858.67	2053.51
LOC105222527	0.16	0.2	0	0	0.05	0.2	0.17	0.11	0.04	0.08	0.04	0.19	0.14	0	0.13	0.32	0.16	0.29	0.12	0.38	0	0.07	0.12	0.23	0.35	0.24	0.49	0.04	0.15	0.27	3	5	0	0	1	6	5	3	1	2	1	5	3	0	3	9	5	7	3
LOC105222528	12.95	13.14	12.06	11.38	11.7	13.29	11.93	10.98	11.87	10.16	13.8	11.84	14.43	13.07	13.67	11.99	11.47	11.03	10.48	9.66	14.06	12.51	14.25	12.77	12.55	12.16	11.54	9.95	9.28	9.37	333.16	440.66	339.05	176.64	323.79	535.98	461.52	402.73	412.75	358.49	487.17	416.84	401.4	379.94	440.42	452.84	474.96	356.33	351.49
LOC105222529	29.42	28.37	31.05	33.8	33.1	26.46	26.42	29.64	29.67	28.24	27.16	33.46	34.56	26.21	33.05	28.27	28.69	31.79	26.63	26.64	25.42	33.35	32.76	33.31	36.03	27.35	27.32	33.17	32.16	23.53	300	377	346	208	363	423	405	431	409	395	380	467	381	302	422	423	471	407	354
LOC105222530	36.65	38.42	32.16	29.41	33.26	29.57	26.96	27.19	28.74	28.39	30.38	30.65	32.51	31.41	36.1	28.04	26.39	27.29	24.93	24.37	34.96	33.46	33.08	35.05	28.5	25.51	26.17	24.09	31.35	24.9	415	567	398	201	405	525	459	439	440	441	472	475	398	402	512	466	481	388	368
LOC105222531	25.3	20.82	20.11	17.5	19.07	16.99	18.54	16.45	18.53	16.38	19.69	17.14	19.76	19.23	22.75	19.16	15.71	18.48	15.64	14.45	16.93	13.97	19.75	16.35	20.43	19.49	16.74	19.36	17.13	18.86	206	221	179	86	167	217	227	191	204	183	220	191	174	177	232	229	206	189	166
LOC105222532	69.57	66.39	67.73	66.49	69.8	63.27	56.67	58.87	62.31	61.69	68.1	65.36	66.88	80.24	67.57	55.98	49.27	59.1	59.04	59.54	60.09	75.86	62.71	66.33	64.59	54.25	58.9	60.52	66.23	55.16	735	914	782	424	793	1048	900	887	890	894	987	945	764	958	894	868	838	784	813
LOC105222533	9.45	8.14	10.04	14.48	9.79	10.13	9.37	7.76	7.45	7.54	9.95	10.95	11.38	8.92	9.9	9.78	8.7	7.03	8.55	7.97	7.85	10.82	11.94	8.37	12.55	7.63	8.99	8.37	8.66	8.62	106	119	123	98	118	178	158	124	113	116	153	168	138	113	139	161	157	99	125
LOC105222534	0.1	0.11	0.05	0.14	0.14	0.06	0.09	0	0.07	0.18	15.02	0.22	13.1	0.12	0.12	12.24	0.09	0.08	3.4	0.13	0.12	0.05	0.06	0.13	13.18	14.74	0.04	0.14	0.04	0.07	2	3	1	2	3	2	3	0	2	5	475	6	325	3	3	410	3	2	101
LOC105222535	41.17	49.61	56.97	39.78	46.25	46.27	51.34	45.85	48.16	48.24	45.04	39.9	45.18	43.09	53.25	34.38	37.39	45.78	37.85	36.65	39.94	41.47	53.56	41.89	42.59	33	38.64	41.81	36.15	36.74	808	1272	1226	472	974	1420	1504	1276	1271	1294	1214	1070	958	956	1311	986	1177	1125	966
LOC105222536	135.59	111.18	130.34	132.47	131.17	112.69	113.48	104.83	113.56	110.26	118.77	120.66	124.93	122.51	129.9	115.54	103.12	107.65	108.95	106.75	115.1	116.1	121.76	126.74	127.95	108.1	113.6	115.2	122.35	98.5	1891	2006	1989	1120	1977	2451	2355	2091	2126	2104	2262	2298	1867	1925	2270	2348	2294	1870	1973
LOC105222537	2.49	2.71	1.79	2.08	2.54	2.74	3.65	4.33	4.51	2.3	2.27	2.24	3.58	1.79	2.28	3.4	1.58	3.47	2.17	2.1	4.08	2.5	3.54	2.82	1.79	1.36	2.57	2.46	3.3	2.38	37.28	52.96	29.26	18.8	41	64.29	82.24	92.45	91.43	47.2	46.59	45.92	58.07	30.26	42.79	74.75	38	65.27	42.44
LOC105222539	16.98	15.51	12.77	11.42	14.44	9.7	12.64	14.02	13.42	12.73	15.33	15.03	14.47	13.71	14.15	12.69	12.05	14.12	15.23	13.15	14.48	15.73	15.51	16.8	15.83	13.73	13.87	10.49	10.18	14.76	916	1091	753	372	838	821	1025	1078	979	942	1135	1110	844	836	956	1005	1047	957	1071
LOC105222540	84.16	84.4	71.75	78.88	93.4	80.26	67.6	73.39	80.48	77.04	73.35	106.7	97.36	72.92	101.36	85.82	81.2	84.14	102.06	110.35	58.46	112.55	80.85	106.36	116.16	95.45	106.22	65.42	72.61	73.69	2213	2892	2062	1252	2641	3309	2672	2752	2861	2779	2646	3840	2768	2167	3338	3312	3437	2778	3498
LOC105222541	3.87	5.79	5.1	4.62	3.54	5.29	3.84	5	5.68	4.51	6.04	4.47	5.91	4.93	4.45	5.09	4.64	4.38	4.95	4.64	5.17	4.84	4.05	4.68	6.07	4.87	3.45	4.13	5.36	5.16	57	111	82	41	56	122	85	105	113	91	122	90	94	82	82	110	110	81	95
LOC105222542	0.17	0.13	0	0	0	0	0	0	0	0	0	0	0.61	0	0	0	0	0	0	0	0	0	0	0	0.56	0	0	0	0	0	1	1	0	0	0	0	0	0	0	0	0	0	4	0	0	0	0	0	0
LOC105222543	0	0	0	0.21	0	0	0	0	0	0	0	0	0	0	0	0	0.08	0.1	0	0.09	0	0	0	0	0	0	0	0	0	0	0	0	0	1	0	0	0	0	0	0	0	0	0	0	0	0	1	1	0
LOC105222544	0.38	0.48	1.6	0.62	0.7	0.8	2.08	0.61	0.83	0.91	1.64	1	0.23	1.66	0.6	1.87	1.4	0.9	1.15	0.73	0.45	2.19	1.41	0.78	0.28	1.35	1.27	0.79	1	1.51	3	5	14	3	6	10	25	7	9	10	18	11	2	15	6	22	18	9	12
LOC105222545	100.47	89.76	93.84	96.3	99.23	84.28	75.81	98.55	82.23	81.12	83.1	66.56	71.84	104.54	89.34	62.57	64.5	90.4	64.55	70.84	94.53	59.51	86.78	83.64	69.1	54.02	61.28	84.3	81.55	75.27	683	796	698	396	726	899	774	956	756	757	776	619	528	804	762	624	706	772	572
LOC105222546	6.03	6.23	6.09	7.05	5.74	5.03	4.31	5.99	5.75	6	6.15	7.26	6.97	5.18	6.15	6.6	7.7	6.16	7.25	7.39	5.13	7.67	8.12	7.63	7.83	6.23	8.27	5.22	5.02	5.96	173	233	191	122	177	226	186	245	223	236	242	285	216.11	168	221	278	355.34	222	271
LOC105222547	0	0	0.08	0	0.08	0	0	0	0	0	0	0	0.16	0.07	0	0	0	0	0.06	0	0	0	0	0	0	0.19	0.07	0	0	0	0	0	1	0	1	0	0	0	0	0	0	0	2	1	0	0	0	0	1
LOC105222548	6.04	5.48	5.33	6.55	6.07	6.26	5.85	6.11	6.24	5.79	5.96	5.52	6.6	5.09	5.06	7.31	6.41	6.15	6.84	6.82	5.09	5.68	5.73	6.1	5.89	7.76	6.31	5.77	4.55	5.74	344	405	331	224	371	557	500	494	478	450	463	429	405	327	360	608	586	438	506
LOC105222549	41.89	41.72	49.37	35.7	46.69	43.68	42.2	38.33	42.53	40.63	42.66	44.24	38	40.67	41.38	36.84	33.01	37.23	41.07	38.51	38.78	47.6	46.14	38.59	38.56	35.67	40.27	39.18	44.36	37.78	836	1085	1077	430	1002	1367	1266	1091	1148	1112	1168	1208	820	917	1034	1079	1061	933	1069
LOC105222550	41.82	37.3	40.05	41.53	37.15	32.58	36.98	32.59	33.07	32.85	40.96	37.88	38.72	35.7	38.38	24.27	27.09	25.78	25.2	29.28	36.62	32.78	38.71	30.85	38.46	27.85	26.65	31.26	28.35	28.8	921	1070	964	553	880	1125	1224	1023	984	992	1237	1141	923	888	1059	784	960	713	723
LOC105222551	12.21	10.67	10.19	11.7	11.33	9.88	11.16	11.25	11.4	8.64	11.48	9.73	11.87	11.16	10.4	10.02	10.37	10.01	10.29	10.14	11.19	10.9	10.61	12.52	10.86	9.61	10.36	10.29	9.97	12.55	510	581	465	295	509	647	701	670	644	495	658	556	536	527	544	614	697	525	560
LOC105222552	21.67	30.31	32.17	26.71	23.84	1.1	0.53	0.92	0.41	0.94	22.8	30.91	40.68	36.75	44.9	0.4	0.62	0.56	0.48	0.51	34.09	36.73	32.1	45.71	36.01	0.59	0.2	0.35	0.32	0.48	929	1693	1507	691	1099	74	34	56	24	55	1341	1813	1885	1780	2410	25	43	30	27
LOC105222553	17.79	17.52	18.38	16.76	19.93	18.66	20.14	17.42	20.04	19.9	21.95	21.06	21.78	19.26	21.46	19.64	17.48	16.39	17.7	16.79	18.1	19.25	18.23	17.42	21.27	20.07	15.82	17.22	17.7	17.14	392	505	443	225	472	646	669	546	598	603	662	638	517	481	592	636	621	455	509
LOC105222554	26.77	27.75	27.31	22.18	25.28	22.02	20.89	20.66	21.28	20.4	25.61	27.06	27.44	25.07	28.58	19.82	19.95	21.09	19.84	19.45	28.35	23.47	25.82	27.36	24.5	19.61	20.57	20.54	20.28	18.68	842	1144	944	430	859	1095	987	935	907	893	1110	1181	945	900	1136	915	1022	841	819
LOC105222555	2.39	2.77	4.41	3.49	4.08	2.05	2.14	2.15	1.98	1.98	2.89	1.9	1.92	2.84	3.31	1.63	2.84	2.84	2.6	2.26	1.74	3.04	3.78	3.45	3.91	1.6	1.84	1.91	1.49	1.97	67	101	135	59	123	90	90	86	75	76	111	73	58	90	116	67	128	100	95
LOC105222556	0.42	0.79	0.28	0.35	0.39	0.31	0.44	0.4	0.34	0.24	3.22	0.55	4.81	0.35	0.48	4.74	0.45	0.75	1.88	0.46	0.25	0.64	0.58	0.27	4.76	6.85	0.54	0.33	0.38	0.33	14	34	10	7	14	16	22	19	15	11	146	25	172	13	20	230	24	31	81
LOC105222557	0.56	1.28	0.77	0	0.97	1.2	1.48	0.93	0.57	0.97	1.12	0.25	0.39	1.17	1.45	0.76	1	1.28	1.28	0.35	1.24	0.61	0.86	0.37	0.39	0.97	1.42	1.1	1.27	1.2	8	24	12	0	15	27	32	19	11	19	22	5	6	19	26	16	23	23	24
LOC105222558	7.5	7.03	7.47	7.08	6.55	7.06	6.92	5.96	6.75	7.22	6.62	6.24	6.33	7.15	5.73	6.02	5.41	5.28	5.15	6.9	5.52	6.32	8.11	6.56	5.88	5.37	6.25	5.72	5.81	6.75	181	221	197	103	170	267	251	205	220	239	219	206	165	195	173	213	210	160	162
LOC105222559	17.52	14.23	13.23	16.54	17.62	15.2	13.55	17.57	13.86	21.39	19.6	14.14	17.15	13.7	17.73	17.49	18.6	16.71	14.53	14.8	13.56	15.54	16.04	21.12	16.15	21.03	12.94	13.17	17.11	13.6	86	91	71	49	93	117	100	123	92	144	132	95	91	76	109	126	147	103	93
LOC105222560	15.43	16.79	13.83	16.11	16.12	15.98	18.63	12.53	14.54	12.18	13.25	14.98	16.42	15.34	11.31	15.12	12.61	14.98	12	14.97	19.23	15.46	16.29	14.93	15.7	13.68	16.29	16	16.99	12.28	146	207	143	92	164	237	265	169	186	158	172	194	168	164	134	210	192	178	148
LOC105222561	7.35	6.1	5.7	7.46	8.16	7.27	8.88	9.36	6.16	7.16	6.23	7.56	7.98	7.43	6.89	9.97	6.76	7.17	6.91	8.66	7.85	7.41	6.83	7.37	8.04	8.44	9.4	8.28	8.44	6.13	98	106	83	60	117	152	178	178	111	131	114	138	115	112	115	195	145	120	120
LOC105222562	12.54	13.17	16.2	13.48	14.83	14.31	12	13.81	16.03	15.39	13.47	13.1	14.65	13.04	14.93	12.96	15.85	15.68	14.68	13.5	12.81	13.34	11.01	13.07	11.05	12.96	13.22	14.83	17.43	13.03	114	156	161	74	145	204	164	179	197	192	168	163	144	134	170	173	232	179	174
LOC105222563	0.24	0.73	0.43	0	0.22	0.15	0.63	0.17	0	0.34	0.17	0	0	0.21	0	0	0	0.38	0.18	0	0	0	0.27	0	0	0.36	0	0	0	0.14	1	4	2	0	1	1	4	1	0	2	1	0	0	1	0	0	0	2	1
LOC105222564	4.71	2.74	3.54	3.9	4.17	4.89	4.19	4.05	3.03	4.37	3.38	5.05	4.36	5.18	4.06	5.54	5.05	4.05	5.36	4.08	4.88	4.27	3.76	3.26	4.67	4.33	3.6	3.17	5.38	3.37	62	47	51	31	59	101	83	76	54	79	61	91	62	77	67	107	107	67	92
LOC105222565	486.72	515.82	506.63	538.65	498.04	546.65	544.68	563.67	539.5	533.53	493.41	492.31	451.05	523.79	484.62	506.07	515.9	502.05	488.67	480.3	544.35	458.87	476.81	477.23	458.43	480.29	513.85	583.4	594.32	539.32	6494	8969	7388	4338	7146	11436	10925	10725	9732	9765	9032	8990	6507	7898	8098	9910	11081	8411	8499
LOC105222566	110.74	109.31	106.18	106.28	118.27	131.73	114.64	112.21	107.3	113.21	108.66	134.68	122.84	101.53	121.91	111.17	101.07	104.42	111.54	124.93	101.35	116.66	116.82	102.02	120.38	109.53	121.77	114.11	125.34	88.89	1690	2174	1771	979	1941	3152	2630	2442	2214	2370	2275	2813	2027	1751	2330	2490	2483	2001	2219
LOC105222567	48.28	46.94	47.07	41.61	45.99	43.35	39.97	37.77	37.51	36.6	46.3	51.96	51.09	43.23	46.72	38.73	38.08	40.89	44.86	39.01	44.48	53.16	45.32	54.06	47.43	43.05	44.17	37.88	40.36	38.12	1616	1948	1429	775	1549	1817	1547	1530	1471	1398	2031	2506	1773	1457	1933	1757	1835	1472	1776
LOC105222568	16.38	14.93	14.3	13.95	16.93	13.42	12.61	14.82	14.98	15.65	13.03	18.18	17.58	14.12	16.24	18.65	17.29	17.42	21.32	19.04	12.68	20.79	14.06	20.86	20.76	18.39	19.09	13.5	13.48	15.92	393	467	375	202	437	505	455	507	486	515	429	597	456	383	488	657	668	525	667
LOC105222569	5.73	3.39	4.25	2.4	2.5	4.9	4.58	3	4.45	3.54	3.17	4.61	3.49	4.81	3.24	6.47	3.65	3.93	5.06	3.74	2.85	1.99	4.73	5.57	4.21	4.58	5.1	5.15	5.35	4.55	79	61	64	20	37	106	95	59	83	67	60	87	52	75	56	131	81	68	91
LOC105222570	56.02	58.63	56.5	57.49	59.17	61.07	63.77	61.82	53.71	60.02	49.61	51.93	51.82	53.64	54.98	52.3	51.88	57.59	53.17	57.11	58.86	63.5	58.41	52.68	51.6	51.9	66.15	65.53	60.49	50.12	1135	1548	1251	703	1289	1940	1942	1786	1471	1668	1379	1440	1135	1228	1395	1555	1692	1465	1404
LOC105222571	24.8	22.3	22.34	20.55	22.45	18.59	19.97	22.13	22.67	21.9	23.93	24.19	24.94	23.42	22.02	26.91	25.88	24.51	28.4	25.65	21.42	24.31	23.48	25.89	25.02	25.94	27.2	20.01	18.95	25.13	1853	2166	1824	925	1803	2180	2235	2354	2292	2248	2446	2474	2018	1978	2063	2963	3121	2298	2774
LOC105222572	0.41	0.04	0.56	0.55	0.18	0.23	0.02	0.12	0.08	0.04	0.12	0.38	0.36	0.02	0.04	0.06	0.4	0.22	0.32	0.1	0.03	0.8	0.12	0.22	0.25	0.15	0.02	0.04	0.04	0	15	2	22	12	7	13	1	6	4	2	6	19	14	1	2	3	23	10	15
LOC105222573	11.09	10.94	15.98	10.15	14.15	8.72	8.89	10.03	8.89	12.22	11.77	21.19	13.42	10.62	16.89	9.26	12.2	10.59	15.19	12.96	9.14	12.22	14.08	14.62	14.98	12.9	13.33	8.1	9.71	8.62	238	304	367	130	328	291	285	303	255	355	345	618	312	256	456	288	412	284	415
LOC105222574	0	0	0	0	0	0	0	0	0	0	0	0	0	0	0	0	0	0	0	0	0	0	0	0	0	0	0	0	0	0	0	0	0	0	0	0	0	0	0	0	0	0	0	0	0	0	0	0	0
LOC105222575	2.94	2.38	1.52	2.64	1.85	2.79	1.74	3.3	4.94	4	2.76	1.92	2.03	3.16	2.01	4.66	5.69	5.27	6.15	5.93	2.03	3.43	2.29	2.1	3.55	5.17	4.52	4.36	2.73	6.15	191	200	106	101	127	279	168	303	429	350	240	171	140	228	165	443	588	422	515
LOC105222576	0.09	0.2	0.14	0.04	0	0.05	0.07	0.06	0.1	0.13	0.17	0.08	0.04	0	0.02	0.21	0.05	0.05	0.2	0.03	0.05	0.05	0.02	0.1	0.24	0.38	0.27	0.05	0.2	0.04	4	12	7	1	0	4	5	4	6	8	11	5	2	0	1	14	4	3	12
LOC105222577	8.96	7.49	7.71	7.31	8.77	7.27	5.78	9.3	8.38	8.09	6.39	7.36	7.18	8.88	7.94	10.99	10.98	12.76	13.45	11.86	5.21	8.38	7.99	11.2	11.05	11.93	10.19	7.55	5.34	11.14	609	664	573	300	641	775	591	902	770	755	596	685	528	682	676	1097	1202	1089	1192
LOC105222579	11.71	10.83	12.84	9.56	10.67	11.41	10.02	10.92	13.05	9.47	11.93	8.57	10.76	11.93	10.28	10.04	8.45	8.62	12.08	10.7	15.58	9.78	10.1	8.32	10.37	9.63	9.05	10.63	9.05	9.2	137.46	165.6	164.69	67.73	134.62	210.01	176.7	182.8	207.1	152.43	192.1	137.64	136.58	158.19	151.15	172.95	159.62	127.06	184.79
LOC105222581	0.16	0	0	0.26	0.29	0.3	0.31	0.11	0.35	0.11	0	0	0	0	0.25	0.32	0	0.13	0	0.46	0	0	0.18	0.14	0	0	0	0.37	0.11	0.27	1	0	0	1	2	3	3	1	3	1	0	0	0	0	2	3	0	1	0
LOC105222582	0.53	0.45	0.44	0	0.31	0.31	0.16	0.34	0.21	0.35	0.25	0.74	0.13	0.13	0.19	0.13	0.27	0.23	0.07	0.6	0.46	0.42	0.16	0.22	0.22	0.34	0.29	0.27	0.14	0.78	11	12	10	0	7	10	5	10	6	10	7	21	3	3	5	4	9	6	2
LOC105222583	14.5	19.97	17.04	16.63	16.96	4.45	3.58	4.4	3.58	4.78	19.77	19.83	17.97	21.02	20.68	4.65	4.09	3.73	3.87	3.04	20.78	17.35	17.12	20.34	17.59	3.45	4.11	4.88	3.88	4.18	455	820	564	300	601	242	163	209	162	216	886	875	631	724	797	219	192	156	163
LOC105222584	0.31	0.16	0.38	0.51	0.1	0.33	0.07	0.07	0.08	0.08	0.08	0.3	0.1	0.09	0.33	0	0.13	0.25	0.08	0	0.49	0.26	0	0.28	0.23	0	0.26	0.08	0.15	0.24	3	2	4	3	1	5	1	1	1	1	1	4	1	1	4	0	2	3	1
LOC105222585	0	0	0.19	0	0	0.06	0.07	0	0	0	0	0	0	0	0	0.14	0	0	0	0	0	0	0.11	0	0	0.16	0	0	0	0	0	0	2	0	0	1	1	0	0	0	0	0	0	0	0	2	0	0	0
LOC105222586	0	0	0	0	0.07	0	0	0	0	0	0	0	0	0	0	0	0	0	0	0	0.09	0	0	0	0	0	0	0	0	0	0	0	0	0	1	0	0	0	0	0	0	0	0	0	0	0	0	0	0
LOC105222587	18.19	25.23	22.62	17.65	23.32	21.94	21.17	22.28	21.13	20.53	21.75	23.04	21.45	21.85	23.76	20.13	17.38	20.83	19.28	18.78	19.73	20.69	23.48	19.04	18.93	19.79	23.37	20.76	20.1	18.88	676	1222	919	396	932	1279	1183	1181	1062	1047	1109	1172	862	918	1106	1098	1040	972	934
LOC105222588	0.15	0.04	0	0	0	0.06	0	0	0	0.04	5.79	0.07	6.4	0	0	7.57	0.03	0.04	2.88	0.04	0	0	0.16	0	6.75	8.94	0	0.04	0	0.03	3	1	0	0	0	2	0	0	0	1	163	2	142	0	0	228	1	1	77
LOC105222589	0.06	0	0.05	0	0	0	0	0	0	0	2.61	0	3.01	0	0	4.09	0	0.04	1.1	0	0	0	0	0	2.03	4.12	0.14	0	0	0	1	0	1	0	0	0	0	0	0	0	65	0	59	0	0	109	0	1	26
LOC105222590	2.68	0.1	5.83	0	0.58	0.36	0.08	0.66	0.14	0	0.18	1.09	3.52	1.1	2.74	0.72	5.89	2.59	2.35	0.82	0.45	1.33	0.35	0.73	0.98	1.15	0.11	0.1	0	0.07	43	2	102	0	10	9	2	15	3	0	4	24	61	20	55	17	152	52	49
LOC105222591	34.53	33.63	35.62	31.44	34.09	30.45	33.13	32.15	32.41	30.52	34.11	35.05	35.33	31.1	36.93	27.03	28.89	28.66	28.89	28.29	38.84	30.28	32.38	34.89	33.66	28.21	31.53	29.57	28.3	26.82	1035	1326	1152	568	1086	1386	1477	1372	1298	1216	1398	1442	1141	1042	1359	1177	1385	1061	1119
LOC105222592	0.35	0	0.11	0	0	0	0.16	0	0	0.09	0.09	0	0	0	0	0	0	0	0	0.17	0	0	0	0	0.13	0	0	0	0	0	3	0	1	0	0	0	2	0	0	1	1	0	0	0	0	0	0	0	0
LOC105222593	8.7	7.16	6.07	6.21	7.2	6.79	7.73	6.5	6.15	6.72	9.36	8.16	7.63	7.04	7.19	6.5	5.7	5.19	5.62	6.1	7.31	6.75	9.35	7.24	7.31	6.33	4.75	6.62	5.74	5.52	290	311	221	125	258	355	387	309	277	307	428	372	275	265	300	318	306	217	244
LOC105222594	0.89	0.85	0.38	0.61	0.64	1.94	1.82	0.85	3.77	1.26	1.69	0.58	0.73	1.21	0.67	2	2.15	1.76	1.65	1.68	0.44	0.72	1.48	1.17	0.65	1.5	1.69	1.86	2.84	1.3	17	21	8	7	13	58	52	23	97	33	44	15	15	26	16	56	66	42	41
LOC105222595	15.05	15	11.77	18.54	11.72	10.42	11.12	10.64	10.18	12.66	11.72	10.05	15.58	12.63	10.06	14.55	10.86	13.83	13.12	12.14	8.1	9.97	8.53	10.35	12.21	12.48	9.8	9.43	14.18	10.73	117	152	100	87	98	127	130	118	107	135	125	107	131	111	98	166	136	135	133
LOC105222596	12.48	9.96	9.17	9.11	12.39	8.78	10.4	10.77	10.25	8.13	12.06	9.68	9.7	9.28	8.68	9.19	9.46	10.27	9.62	10.74	8.85	8.28	11	9.37	11.93	12.17	9.55	9.64	9.42	9.82	306.32	318.59	246	134.98	327.06	337.99	383.94	376.96	340.25	273.78	406.2	325.42	257.4	257.62	266.97	331.12	373.84	316.69	307.9
LOC105222597	0.13	0.37	0.24	0.36	0.2	0.25	0.32	0.31	0.32	0.16	0.35	0.29	0.12	0.15	0.21	0.06	0.38	0.35	0.17	0.03	0.36	0.22	0.3	0.08	0.44	0.1	0.15	0.17	0.1	0.35	3	11	6	5	5	9	11	10	10	5	11	9	3	4	6	2	14	10	5
LOC105222598	927.56	1068.43	887.59	1227.95	900.17	2375.94	2290.27	2353.98	2524.47	2757.92	957.65	788.34	705.97	1172.5	905.56	2285.21	2566.95	3234.03	2598.58	2780.36	912.34	942.31	747.01	969.67	909.78	2140.75	2258.56	2633.44	2700.44	2769.78	9840.67	14772.1	10291.9	7863.47	10270.2	39522.6	36527.3	35614.5	36210.3	40137.2	13938.9	11446.9	8098.24	14057.9	12032.1	35582.6	43840.7	43081.6	35937.1
LOC105222599	1.66	2.02	1.14	2.07	1.8	2.21	1.66	1.65	1.84	1.21	1.31	1.72	0.64	3.43	1.77	1.32	2.15	2.87	1.28	1.81	1.98	0.35	1.25	0.87	1.24	1.07	2.82	2.4	1.92	2.55	12	19	9	9	14	25	18	17	18	12	13	17	5	28	16	14	25	26	12
LOC105222601	0.07	0.15	0	0	0.12	0	0.22	0.19	0	0.05	0.15	0	0.31	0.06	0	0	0.25	0.26	0.15	0	0	0.42	0.22	0	0.67	0.46	0.11	0.26	0.15	0.04	1	3	0	0	2	0	5	4	0	1	3	0	5	1	0	0	6	5	3
LOC105222603	177.15	221.13	215.08	241.43	236.52	256.99	254.45	277.86	334.85	343.72	244.63	231	222.59	230.54	223.47	224.58	245.79	255.53	233.87	268.15	238.79	240.38	220.94	216.27	183.49	193.98	208.29	262.41	222.23	240.99	2602.78	4234	3453.71	2141.05	3737	5920.22	5620.09	5821.8	6651.51	6927.46	4931.01	4645.02	3536	3827.9	4111.92	4842.79	5813.33	4714	4479.09
LOC105222604	26.41	30.31	31.54	30.97	35.35	34.38	27.95	33.35	35.98	37.97	28.33	28.74	21.94	32.68	25.33	32.45	33.56	40.98	35.17	43.76	29.02	26.66	33.18	23.81	27.39	31.4	33.01	35.69	36.45	33.51	462	690.94	603	327	665	943	735	832	851	911	680	688	415	646	555	833	945	900	802
LOC105222605	0.1	0	0	0	0	0	0	0	0	0	0	0	0	0	0	0	0	0	0	0	0	0	0	0	0.12	0	0.09	0	0	0	1	0	0	0	0	0	0	0	0	0	0	0	0	0	0	0	0	0	0
LOC105222606	0	0	0	0	0	0	0	0	0	0	0	0	0	0	0	0	0	0	0	0	0	0	0	0	0	0	0	0	0	0	0	0	0	0	0	0	0	0	0	0	0	0	0	0	0	0	0	0	0
LOC105222607	54.51	49.28	47.77	45.01	52.9	43.71	40.41	45.88	49.34	46.3	51.15	56.79	53.01	48.77	51.33	50.95	50.27	50.51	55.85	55.45	48.34	57.4	51.59	58.6	56.2	50.4	53.84	39.15	38.45	50.03	3447	4061	3301	1718	3597	4334	3841	4137	4218	4016	4437	4915	3624	3485	4065	4728	5117	4010	4603
LOC105222608	0	0	0	0	0.29	0	0	0	0	0	0	0	0	0	0	0	0	0.25	0	0	0	0	0.17	0	0	0	0	0	0	0.09	0	0	0	0	2	0	0	0	0	0	0	0	0	0	0	0	0	2	0
LOC105222609	0	0	0	0	0	0	0	0	0	0	0	0	0	0	0	0	0	0	0	0.28	0	0	0.14	0	0	0.1	0	0	0	0	0	0	0	0	0	0	0	0	0	0	0	0	0	0	0	0	0	0	0
LOC105222610	0	0	0	0	0	0	0	0	0	0	0	0	0	0	0	0	0	0.11	0	0	0	0	0.47	0	0	0	0	0	0	0	0	0	0	0	0	0	0	0	0	0	0	0	0	0	0	0	0	1	0
LOC105222611	0	0	0	0	0	0	0	0	0	0	0	0	0	0	0	0	0	0	0	0	0	0	0	0	0	0	0	0	0	0	0	0	0	0	0	0	0	0	0	0	0	0	0	0	0	0	0	0	0
LOC105222612	102.14	82.8	71.72	77.08	100.79	73.78	83.61	77.52	79.21	76.77	77.25	73.43	79.35	78.21	72.5	79.45	98.83	98.41	91.66	94.88	80.29	87.61	82.88	94.51	85.67	79.38	82.36	80.63	86.71	86.08	2125	2245	1631	968	2255	2407	2615	2300	2228	2191	2205	2091	1785	1839	1889	2426	3310	2571	2486
LOC105222613	31.54	32.98	35.39	35.15	30.43	35.28	33.99	36.41	30.46	29.51	30.42	32.06	31.03	29.2	32.6	28.77	33.72	34.84	29.89	29.76	37.83	31.46	34.54	25.84	31.9	28.14	32.81	32.79	35.49	26.76	455	620	558	306	472	798	737	749	594	584	602	633	484	476	589	609	783	631	562
LOC105222614	18.46	19.23	16.92	17.34	16.61	14.06	13.28	17.42	17.88	16.1	15.64	17.9	16.45	18.15	16.18	15.61	18.34	17.28	19.31	17.95	16.3	18.72	16.07	21.34	19.11	17.24	17.36	13.28	11.83	19.07	2284	3100	2288	1295	2210	2727	2469	3072	2990	2732	2655	3030	2200	2537	2507	2834	3652	2684	3114
LOC105222617	0	0	0	0	0	0	0	0	0	0	0	0	0	0	0	0	0	0	0	0	0	0	0	0	0	0	0	0	0	0	0	0	0	0	0	0	0	0	0	0	0	0	0	0	0	0	0	0	0
LOC105222618	91.02	87.74	84.21	88.33	89.77	81.35	93.07	85.12	86.66	83.72	89.96	88.9	82.03	87.93	84.22	87.46	84.34	85.85	86.77	83.78	76.95	75.65	82.36	91.81	85.99	78.45	82.29	92.08	73.85	80.53	1253	1574	1267	734	1329	1756	1926	1671	1613	1581	1699	1675	1221	1368	1452	1767	1869	1484	1557
LOC105222619	0	0	0	0	0	0	0	0	0	0	0	0	0	0	0	0	0	0	0	0	0	0	0	0	0	0	0	0	0	0	0	0	0	0	0	0	0	0	0	0	0	0	0	0	0	0	0	0	0
LOC105222620	0	0	0	0	0	0	0	0	0	0	0.11	0	0	0	0	0	0	0	0.06	0	0	0	0	0	0	0	0	0	0	0	0	0	0	0	0	0	0	0	0	0	2	0	0	0	0	0	0	0	1
LOC105222621	0	0	0	0	0	0	0	0	0	0	0	0	0	0	0	0	0	0	0	0	0	0	0	0	0	0	0	0	0	0	0	0	0	0	0	0	0	0	0	0	0	0	0	0	0	0	0	0	0
LOC105222622	0	0	0	0	0	0	0	0	0	0	0	0.14	0.09	0	0	0	0	0	0	0	0	0	0	0	0	0	0	0	0	0	0	0	0	0	0	0	0	0	0	0	0	2	1	0	0	0	0	0	0
LOC105222623	0	0	0	0	0	0	0.45	0	0	0.38	0	0	0	0	0	0.05	0	0	0.06	0	0	0	0	0	0	0	0	0	0	0.04	0	0	0	0	0	0	9	0	0	7	0	0	0	0	0	1	0	0	1
LOC105222624	0	0.06	0.07	0	0	0.05	0.1	0	0.06	0	0.29	0.23	0.29	0.07	0.13	0	0	0	0	0	0	0.39	0.09	0	0.09	0.18	0.07	0.06	0	0.05	0	1	1	0	0	1	2	0	1	0	5	4	4	1	2	0	0	0	0
LOC105222625	16.37	14.35	15.33	10.33	12.56	14.42	12.88	14.94	16.24	14.87	15.91	13.48	12.38	14.6	14.83	14.34	17.92	19.76	15.95	13.3	20.39	13.32	14.61	11.96	13.64	13.51	16.39	15.16	12.24	16.97	126	144	129	48	104	174	149	164	169	157	168	142	103	127	143	162	222	191	160
LOC105222626	0.76	1.02	0.87	0	1.42	2.51	2.15	4.67	2.82	2.08	0.83	1.25	1.94	1.52	2.89	4.15	7.8	5.15	6.38	5.81	2.42	0.71	2.35	1.7	0.85	2.44	2.26	0.75	1.95	3.91	4	7	5	0	8	20.65	17	35	20	15	6	9	11	9	19	32	66	34	43.71
LOC105222627	0	0	0	0	0	0	0	0	0	0	0	0	0.08	0	0	0	0	0	0	0	0	0	0	0	0	0	0	0	0	0	0	0	0	0	0	0	0	0	0	0	0	0	1	0	0	0	0	0	0
LOC105222628	0	0	0	0	0	0	0	0.03	0	0.03	0	0	0	0	0	0	0	0	0	0	0	0	0	0	0	0	0	0	0	0	0	0	0	0	0	0	0	1	0	1	0	0	0	0	0	0	0	0	0
LOC105222629	0	0	0	0	0	0	0	0	0	0	0	0	0	0	0	0	0	0	0	0	0	0	0	0	0	0	0	0	0	0	0	0	0	0	0	0	0	0	0	0	0	0	0	0	0	0	0	0	0
LOC105222630	0	0	0	0	0	0	0	0	0	0	0	0	0	0	0.02	0.05	0	0	0	0	0	0	0	0	0	0	0	0	0	0	0	0	0	0	0	0	0	0	0	0	0	0	0	0	1	3	0	0	0
LOC105222631	19.13	20.12	16.81	15.84	17.38	15.54	10.44	17.55	16.04	12.63	16.29	21.83	18.14	18.84	18.76	16.09	21.3	17.97	22.18	19.94	18.13	17.74	18.44	23.91	21.36	16.5	20.15	13.41	9.04	20.99	434	595	417	217	424	553	356	568	492	393	507	678	445	483	533	536	778	512	656
LOC105222632	0	0.02	0.03	0	0	0	0	0	0.02	0	0	0	0	0	0.02	0	0	0	0.02	0	0	0	0	0	0	0	0	0	0	0.02	0	1	1	0	0	0	0	0	1	0	0	0	0	0	1	0	0	0	1
LOC105222633	6.73	8.15	7.26	9.07	12.42	20.42	9.5	5.99	10.97	11.69	10.01	16.91	9.46	9.49	11.49	10.93	7.17	5.8	10.92	15.98	9.37	14.5	10.71	9.24	15.71	11.04	15.94	7.46	16.63	6.42	123	194	145	100	244	585	261	156	271	293	251	423	187	196	263	293	211	133	260
LOC105222634	30.23	21.12	23.23	35.96	26.54	59.41	80.81	57.36	90.06	67.03	23.88	15.2	15.08	30.6	17.56	91.35	90.27	78.68	91.23	103.95	15.74	18.94	12.12	14.29	14.04	88.16	92.57	98.14	77.35	97.83	811	738	680	581	765	2495	3256	2190	3260	2463	879	557	437	926	589	3592	3891	2646	3187
LOC105222635	0	0	0	0	0	0	0	0.04	0	0	0.08	0	0	0	0	0.04	0	0	0.04	0	0	0	0	0	0.12	0	0	0	0	0	0	0	0	0	0	0	0	1	0	0	2	0	0	0	0	1	0	0	1
LOC105222636	3.43	2.46	1.85	2.43	1.11	10.08	6.89	10.43	14.93	19.42	1.86	0.78	1.34	5.02	0.77	13.78	13.65	18.44	19.27	20.73	1.77	1.88	0.28	3.78	1.36	16.9	8.48	11.32	9.91	14.29	178	166	105	76	62	819	537	771	1046	1381	132	55	75	294	50	1048	1139	1200	1302
LOC105222637	0.05	0.07	0.04	0.16	0.28	0.08	0.11	0.03	0.03	0.1	0.15	0.12	0.12	0.04	0.04	0.16	0.03	0	0.04	0	0.12	0.05	0	0	0	0.22	0.15	0.36	0.03	0.05	1.19	2.35	1.23	2.53	7.84	3.46	4.37	1.19	1.17	3.6	5.47	4.38	3.42	1.2	1.31	6.04	1.19	0	1.22
LOC105222638	11.27	9.07	12.86	10.08	10.22	11.98	8.96	13.09	10.46	10.35	11.59	10.95	12.07	9.61	7.69	14.89	12.18	10.93	12.42	11.04	9.59	9.49	9.68	13.51	11	10.63	9.41	9.31	9.7	10.42	289.81	304.65	351.77	151.47	285.16	463.54	322.63	461.81	348.83	363.4	409.53	377.62	322.58	266.8	238.69	546.96	492.81	361	398.78
LOC105222639	4.91	4.36	4.31	4.83	4.11	3.35	4.04	3.13	3.67	3.79	4.53	4.3	4.76	3.48	4.31	2.85	3.38	3.29	2.91	3.14	4.27	4.19	4.75	4.08	4.5	4.27	3.21	3.06	3.8	3.07	101	117	97	60	91	108	125	92	102	107	128	121	106	81	111	86	112	85	78
LOC105222640	25.23	25.37	22.91	26.12	25.33	29.8	33.25	34.51	33.57	33.09	33.78	26.11	28.11	25.45	24.88	35.16	29.92	35.16	32.04	28.74	25.34	23.9	21.39	24.09	29.67	38.43	30.34	31.11	32.39	27.16	264	346	262	165	285	489	523	515	475	475	485	374	318	301	326	540	504	462	437
LOC105222641	5.24	5.3	4.93	4.24	6.22	4.91	5.68	5.08	5.4	5.64	4.56	4.71	5.41	5.97	3.69	5.31	4.52	6.09	5.15	3.36	5.42	4.35	5.44	4.76	4.16	3.75	4.85	4.88	4.97	4.5	170	224	175	83	217	250	277	235	237	251	203	209	190	219	150	253	236	248	218
LOC105222642	15.24	13.5	15.55	13.99	15.18	18.4	18.39	19.02	20.01	17.65	15.74	15.59	15.45	14.75	13.99	17.35	19.73	17.08	17.6	17.05	15.95	15.29	15.07	14.21	13.26	18.76	19.12	22.34	18.53	17.51	417	499	476	241	457	820	765	759	758	691	607	596	461	467	500	719	887	607	645
LOC105222643	1.44	0.55	0.94	2.05	0.48	0.39	0.48	0.72	0.08	0.38	1.13	0.45	0.57	0.55	0.9	0.35	0.32	0.41	0.63	0.3	1.47	0	0.7	0.46	0.23	0.95	0.26	0.57	0.38	0.47	14	7	10	12	5	6	7	10	1	5	15	6	6	6	11	5	5	5	8
LOC105222644	0.53	0.18	0.32	0	0.11	0.07	0	0.37	0	0.09	0.17	0.21	0.05	0.21	0.09	0.04	0.15	0.09	0.13	0.04	0.14	0.44	0.26	0.16	0	0	0	0.28	0.17	0.13	9	4	6	0	2	2	0	9	0	2	4	5	1	4	2	1	4	2	3
LOC105222645	7.64	6.39	6.81	6.02	7.37	5.48	6.17	5.56	5.26	5.5	7.2	6.54	7.32	6.12	6.73	5.49	4.29	4.72	5.25	4.93	7.33	6.88	6.83	6.61	6.07	5.79	5.01	4.85	4.44	4.14	400	440	388	192	405	454	476	406	356	399	515	459	418	361	429	407	361	308	347
LOC105222646	0.56	0.2	0.28	0.87	0.11	0.22	0.15	0.29	0.14	0.27	0.25	0.22	0.45	0.53	0.21	0.18	0.16	0.24	0.03	0.08	0.27	0.38	0	0.61	0.08	0.38	0.03	0.15	0.27	0.3	15	7	8	14	3	9	6	11	5	10	9	8	13	16	7	7	7	8	1
LOC105222647	0.79	0.84	0.57	0.59	0.76	0.99	0.84	1.04	1.36	1.06	0.83	0.8	0.79	1.25	0.45	1.1	1.1	1.5	1.69	1.56	1.03	1.25	0.92	1.54	0.81	1.06	0.87	0.76	0.91	1.14	34	45	29	14	34	63	59	62	89	75	53	58	40	61	28	83	83	87	108
LOC105222649	0.5	0.5	0.61	0.65	0.54	0.35	0.27	0.44	0.53	0.36	1.82	0.59	2.12	0.56	0.45	2.07	0.4	0.45	1.18	0.46	0.51	0.79	0.37	0.75	1.93	2.94	0.57	0.2	0.4	0.59	23	30	31	18	27	25	19	29	33	23	115	37	106	29	26	140	30	26	71
LOC105222650	105.66	61.28	96.59	94.39	74.54	102.33	89.66	95.47	103.59	93.54	103.21	94.79	96.76	78.82	62.05	136.97	145.19	98.78	120.25	105.65	67.36	94.92	69.02	87.87	95.74	153.25	94.83	112.89	110.87	117.35	4221	3181	4211	2270	3194	6276	5288	5377	5463	5039	5647	5223	4216	3584	3111	7981	9224	4901	6215
LOC105222651	5.77	4.5	4.25	5.97	5.81	7.42	6.44	6.09	5.97	6.84	5.57	5.11	4.94	4.84	5.55	5.94	7.09	6.71	6.69	5.74	6.09	6.62	5.61	5.12	4.12	5.78	5.11	5.61	4.79	6.07	133	135	107	83	144	268	223	200	186	216	176	161	123	126	160	201	263	194	201
LOC105222652	32.48	31.67	28.89	27.09	32.12	25.77	26.07	28.79	29.77	26.86	29.79	29.7	27.73	26.7	29.6	30.29	27.62	31.38	28.55	29.37	28.3	31.01	28.53	31.51	28.82	27.28	31.14	23.49	23.86	25.51	1041	1323	1012	524	1107	1295	1256	1316	1290	1181	1310	1303	961	967	1188	1425	1425	1263	1193
LOC105222653	0	0	0	0.06	0.03	0.02	0	0.02	0.08	0.05	0.36	0.03	0.71	0.05	0	0.06	0	0	0	0.07	0.08	0.04	0.1	0	0.13	0.03	0.15	0	0.03	0.02	0	0	0	1	2	2	0	1	5	2	17	1	26	3	0	5	0	0	0
LOC105222655	0.03	0.07	0.15	0.06	0.03	0.24	0.02	0.05	0.03	0.11	0.26	0.19	0.27	0	0.18	0.76	0.05	0.15	0.26	0	0	0.28	0.34	0.07	0.04	0.43	0	0.03	0	0	1	3	5	1	1	10	1	2	1	4	11	7	8	0	6	30	2	5	9
LOC105222657	6.91	10.61	22.88	18.86	14.74	20.09	15.68	14.54	13.08	18.08	10.52	11.88	17.86	7.19	16.23	17.87	25.51	30.27	17.31	13.29	10.15	8.64	12.57	14.17	5.67	9.71	11.87	13.78	15.74	19.29	34	68	123	56	78	155	116	102	87	122	71	80	95	40	100	129	202	187	111
LOC105222658	14.72	14.35	13.5	13.33	13.55	12.35	11.99	11.79	12.95	11.12	12.78	14.69	13.64	12.94	15.41	11.04	11.18	12.02	11.04	11.25	13.94	14.21	14.16	13.65	14.2	11.16	12.56	12.88	9.52	10.82	659	849	658	360	663	872	835	757	808	673	802	899	656	648	866	745	815	677	641
LOC105222660	92.17	87.8	84.12	85.35	95.44	89.77	88.96	86.65	80.63	88.06	89.56	85.53	88.17	86.95	92.1	76.63	79.51	86.5	86.23	85.9	90.64	81.95	90.87	85.57	89.19	82.87	85.92	94.82	95.58	82.4	1603	1990	1599	896	1785	2448	2326	2149	1896	2101	2137	2036	1658	1709	2006	1956	2226	1889	1955
LOC105222661	19.39	15.83	14.86	16.25	17.56	16.54	14.7	14.02	13.89	14.09	18.55	18.2	19.22	15.34	16.05	16.11	14.04	14.41	16.28	15.44	14.12	16.73	14.97	17.28	17.53	16.02	16.07	14.11	13.36	13.55	594	631	493	303	588	803	696	614	587	601	786	769	634	533	622	730	693	553	658
LOC105222662	0.08	0	0	0	0	0.03	0	0	0	0	0	0.03	0.04	0	0	0	0	0	0.03	0	0	0	0	0	0	0	0	0	0.03	0.02	2	0	0	0	0	1	0	0	0	0	0	1	1	0	0	0	0	0	1
LOC105222663	8.04	8.48	7.65	8.62	8.55	6.57	6.96	7.5	7.09	7.19	10.14	7.57	10.19	7.78	8.74	7.51	6.85	6.92	6.37	5.37	8.87	7.83	9.07	8.45	8.98	9.39	5.68	7.52	6.48	5.77	256	352	266	166	292	328	334	341	306	314	442	329	350	281	348	351	350	275	263
LOC105222664	14.44	13.26	15.16	11.9	14.42	13.19	12.7	11.01	13.92	12.54	12.97	11.7	12.3	12.43	11.59	13.01	14.19	14.27	14.38	13.3	12.15	13.47	12.56	13.65	14.5	12.7	12.93	12.04	13.95	12.46	366	438	420	182	393	524	484	398	477	436	451	406	337	356	368	484	579	454	475
LOC105222665	18.77	15.66	14.1	16.91	16.9	12.61	9.07	15.35	16.32	14.25	14.89	16.13	16.93	15.53	15.31	18.32	19.28	18.15	19.5	19.94	12.71	20.98	16.05	20.14	21.5	15.67	19.47	11.65	11.04	16.35	1161	1290	965	639	1179	1287	948	1342	1352	1235	1250	1394	1099	1090	1185	1665	1866	1439	1558
LOC105222666	8.33	9.48	9.46	7.82	10.11	5.84	5.35	5.93	7.1	7.3	7.36	9.3	10.25	8.43	10.06	5.06	7.39	6.57	5.95	7.01	8.98	10.21	8.91	9.1	11.6	6.89	7.92	6.37	5.52	5.62	203	301	252	115	265	223	196	206	234	244	246	310	270	232	307	181	290	201	189
LOC105222667	118.38	127.88	128.26	113.33	121.57	140.17	134.51	148.36	155.13	148.15	116.46	129.86	122.06	118.79	120.36	155.49	165.82	161.49	169.01	171.53	113.15	130.18	128.21	122.5	118.15	147.6	157.8	149.77	152.9	166.16	4089	5758	4844	2362	4516	7590	6986	7307	7241	7021	5519	6140	4559	4636	5202	7879	9225	7005	7608
LOC105222668	0.05	0.04	0	0	0	0.56	0.44	0.22	0.49	0.45	0.11	0	0	0.09	0.08	0.04	0.16	0.04	0.12	0.15	0	0.19	0	0.18	0.06	0.2	0.09	0.04	0.11	0	1	1	0	0	0	17	13	6	13	12	3	0	0	2	2	1	5	1	3
LOC105222669	0.06	0	0	0	0.16	0.07	0	0	0	0	0.76	0	0.16	0	0	0.31	0	0.05	0	0	0	0	0.14	0	0	0.31	0	0	0.04	0	1	0	0	0	3	2	0	0	0	0	18	0	3	0	0	8	0	1	0
LOC105222670	0	0.08	0	0	0	0.1	0	0	0.04	0	0	0.04	0	0	0	0	0	0	0	0	0	0	0	0	0	0.16	0	0	0	0	0	2	0	0	0	3	0	0	1	0	0	1	0	0	0	0	0	0	0
LOC105222672	36.94	41.5	29.1	25.43	32.73	52.73	58.29	57.36	61.93	49.68	32.74	32.65	31.03	34.18	32.86	53.64	54.12	47.85	56.46	50.46	37.27	25.84	31.8	29.53	27.53	52.67	57.42	56.97	54.29	58.58	806	1180	694	335	768	1804	1912	1785	1827	1487	980	975	732	843	898	1718	1901	1311	1606
LOC105222673	1.22	1.24	1.51	0.98	1.35	0.88	0.89	0.88	0.76	0.66	1.23	1.46	1.53	1.53	1.1	1.29	1.03	1.1	1.15	1.46	1.5	1.23	1.55	1.51	2.06	1.03	1.4	0.87	1.23	1.33	31	41	42	15	37	35	34	32	26	23	43	51	42	44	35	48	42	35	38
LOC105222674	0.09	0.26	0	0	0	0.05	0	0	0	0	0.12	0	0	0	0	0	0	0	0.07	0	0	0	0	0	0	0	0.07	0	0.06	0	1	4	0	0	0	1	0	0	0	0	2	0	0	0	0	0	0	0	1
LOC105222675	64.73	64.71	67.9	72.02	68.56	68.45	64.11	63.83	61.48	60.37	73.83	71.02	72.97	69.05	72.89	54.74	54.09	54.46	53.73	54.09	73.34	71.8	76.91	66.75	63.69	55.92	56.27	59.8	58.74	58.3	1489	1940	1707	1000	1696	2469	2217	2094	1912	1905	2330	2236	1815	1795	2100	1848	2003	1573	1611
LOC105222676	125.27	122.01	122.49	129.06	129.49	104.84	107.12	106.85	119.21	111.07	119.81	132.59	135.41	124.18	138.74	112.61	110.05	116.46	114.79	117.62	122.31	132.35	123.11	128.07	128.86	109.7	122.08	119.09	121.74	115.96	4988	6346	5346	3098	5553	6541	6407	6060	6424	6065	6555	7214	5844	5584	6916	6584	7067	5818	5954
LOC105222677	6.57	7.18	6.77	6.32	7.13	6.55	7.72	7.67	5.91	6.54	7	7.24	6.48	5.99	6	6.3	6.21	6.2	6.34	6.77	6.08	7.43	6.95	7.1	8.13	6.48	6.73	7.1	6.64	5.27	167	238	188	97	195	261	295	278	203	228	244	252	178	172	191	235	254	198	210
LOC105222678	0.49	0.75	0.5	0.59	0.54	0.43	0.49	0.27	0.56	0.38	0.59	0.76	0.33	0.33	0.6	0.73	0.38	0.31	0.35	0.45	0.32	0.43	0.69	0.35	0.65	0.82	0.44	0.28	0.19	0.26	15	30	17	11	18	20	22	12	23	16	25	32	11	11	23	33	19	12	14
LOC105222679	9.01	8.61	6.06	7.35	6.63	9.85	8.93	13.19	12.4	11.53	7.22	5.27	7.04	7.19	6.32	13.89	16.28	13.65	15.64	15.55	6.81	6.46	6.29	6.95	5.17	12.56	12.91	10.48	11.34	13.02	335	417	246	165	265	574	499	699	623	588	368	268	283	302	294	758	974	637	758
LOC105222680	33.99	31.27	31.19	31.74	35.51	37.32	38.8	37.44	38.47	34.83	34.42	34.55	33.06	32.64	31.99	38.4	33.38	34.93	37.7	38.29	33.41	35.21	35.29	32.2	36.76	39.56	36.95	35.19	36	34.16	1102	1321	1105	621	1238	1897	1891	1731	1686	1549	1531	1533	1159	1196	1299	1827	1742	1422	1593
LOC105222681	43.63	47.18	45.29	42.09	46.96	49.84	44.64	42.59	45.99	49.01	42.09	48.44	42.03	39.44	51.54	44.23	42.85	43.45	42.91	45.25	34.51	45.58	41.28	45.25	46.36	40.34	50.15	55.46	47.01	44.82	699	985	793	407	809	1252	1075	973	996	1077	925	1062	728	714	1034	1040	1105	874	896
LOC105222682	24.9	20.75	24.07	26.32	26.66	20.13	21.04	21.09	19.73	22.57	22.62	25.54	27	19.94	21.95	22	19.42	18.3	20.98	20.18	23.72	23.84	24.6	21.2	24.35	18.61	17.83	19.63	21.1	16.5	337	366	356	215	388	427	428	407	361	419	420	473	395	305	372	437	423	311	370
LOC105222683	1.66	1.67	1.02	1.57	1.75	1.63	1.17	1.32	1.49	1.68	1.53	1.29	1.51	1.07	1.77	1.34	1.34	1.27	1.47	1.69	1.85	1.61	1.48	1.37	1.77	1.17	1.55	1.57	1.77	1.37	107	140	72	61	121	165	113	121	130	148	135	114	105	78	143	127	139	103	123
LOC105222684	0.07	0.11	0.09	0	0.09	0.23	0.06	0.1	0.07	0.05	0	0.07	0.18	0.06	0.11	0.05	0.03	0.08	0.09	0.09	0	0.09	0.05	0	0.11	0.13	0.04	0.08	0.02	0.05	3	6	4	0	4	15	4	6	4	3	0	4	8	3	6	3	2	4	5
LOC105222686	0	0	0	0	0	0	0	0	0	0	0	0	0	0	0	0	0	0	0	0	0	0	0	0	0	0	0	0	0.02	0	0	0	0	0	0	0	0	0	0	0	0	0	0	0	0	0	0	0	0
LOC105222688	0.09	0.13	0	0.08	0.01	0.09	0.02	0.05	0.09	0.13	0.17	0.09	0.16	0.14	0.07	0.09	0.15	0.05	0.11	0.09	0.16	0.09	0.09	0.06	0.15	0.27	0.16	0.06	0.05	0.07	8	15	0	4	1	12	3	6	10	15	20	11	15	14	8	12	21	5	12
LOC105222689	40.46	71.88	64.78	65.42	72.68	40.94	37.21	40.23	38.6	29.34	84.39	121.24	113.07	42.37	115.36	39.5	18.86	29.03	37.23	55.3	91.32	54.17	61.98	78.91	88.05	56.21	57.22	31.04	42.76	25.58	1495	3461	2616	1459	2888	2372	2067	2120	1928	1487	4278	6131	4517	1769	5338	2142	1122	1347	1793
LOC105222690	9.85	7.34	8.88	8.04	9.29	7.56	8.07	7.61	10.66	10.51	7.49	6.15	7.66	6.19	9.35	8.66	8.87	12.5	11.17	10.57	6.96	9.1	6.1	6.76	5.74	7.81	8.94	9.23	12.72	10.35	69	67	68	34	70	83	85	76	101	101	72	59	58	49	82	89	100	110	102
LOC105222691	0	0.05	0	0.11	0.06	0.04	0.14	0.05	0	0.05	0.05	0.05	0.06	0.12	0.05	0	0.13	0.11	0.05	0	0	0	0.08	0.12	0	0	0.17	0	0	0.04	0	1	0	1	1	1	3	1	0	1	1	1	1	2	1	0	3	2	1
LOC105222692	10.47	10.06	9.72	7.07	11.9	9.89	9.59	9.62	8.66	10.17	10.06	9.86	11.47	8.99	7.99	7.87	8	8.46	8.92	7.27	9.59	11.92	8.72	7.49	11.26	9.14	6.83	7.03	9.29	8.88	135	169	137	55	165	200	186	177	151	180	178	174	160	131	129	149	166	137	150
LOC105222693	8.02	6.99	5.67	4.95	6.51	5.21	6.3	6.08	8.03	6.53	5.26	5.86	7.01	4.71	5.24	6.55	5.66	5.98	6.65	7.62	5.37	6.74	5.66	5.54	5.21	8.93	6.66	6.78	5.54	5.11	110	125	85	41	96	112	130	119	149	123	99	110	104	73	90	132	125	103	119
LOC105222694	12.41	11.26	10.72	10.48	11.42	10.42	11.96	11.45	9.54	11.08	10.29	9.57	9.98	11.12	10.78	9.97	11.81	9.24	10.25	10.63	10.17	11.89	10.34	9.53	11.11	9.43	8.28	10.37	10.72	10.44	180	214	178	96	179	239	268	248	196	231	212	196	164	191	204	215	284	172	195
LOC105222695	6.02	4.46	5.32	5.11	7.21	4.97	5.87	5.41	4.69	6.16	6.31	6.96	6.85	5.45	5.64	5	4.88	5.4	5.1	5.63	4.45	6.71	7.24	6.28	6.88	5.55	4.95	4.86	4.45	3.23	174	168	168	89	224	225	255	223	183	244	250	275	214	178	204	212	227	196	192
LOC105222696	0.18	0.09	0.05	0.1	0.22	0.23	0.16	0.25	0.18	0.04	0.83	0.09	0.66	0.05	0	0.41	0.3	0.1	0.14	0.17	0.64	0.6	0.2	0	1.47	1.61	0.3	0.09	0.13	0.17	3	2	1	1	4	6	4	6	4	1	19	2	12	1	0	10	8	2	3
LOC105222697	7.25	8.05	8.66	8.21	8.23	7.13	9.07	8.33	8.79	6.93	8.39	7.54	8.75	8.7	7.95	6.42	6.57	8.25	6.95	7.32	8.18	9.27	9.4	7.36	9.01	7.07	6.1	8.59	7.21	8.56	177	256	231	121	216	273	333	290	290	232	281	252	231	240	243	230	258	253	221
LOC105222698	0	0	0	0.13	0	0.07	0	0.03	0	0	0.31	0	0.47	0	0	0.4	0	0	0.03	0.03	0	0	0	0	0	0.78	0	0	0	0.04	0	0	0	2	0	3	0	1	0	0	11	0	13	0	0	15	0	0	1
LOC105222699	0	0	0.03	0	0.03	0.05	0	0.08	0	0	0	0	0	0.07	0	0	0.07	0	0.03	0	0	0	0	0	0	0	0	0	0.05	0.04	0	0	1	0	1	2	0	3	0	0	0	0	0	2	0	0	3	0	1
LOC105222700	11.15	7.6	7.36	6.83	7.8	6.5	6.27	7.65	7.16	5.98	9.18	9.36	9.04	8.95	6.94	8.63	9.2	9.07	12.92	9.1	7.13	9.95	7.57	10.85	14.35	11.09	8.82	5.72	6.27	7.31	219.4	194.86	158.4	81.15	165.11	200.69	185.47	214.61	190.39	161.56	247.78	252.18	192.41	199.08	171.05	249.26	291.54	224.22	331.53
LOC105222701	1	1.16	1.22	0.92	1.08	0.16	0.2	0.12	0.14	0.05	0.97	1.52	1.7	1.08	2.02	0.41	0.07	0.1	0.28	0.12	1.76	1.47	1.44	1.66	1.03	0.11	0.14	0.1	0.09	0.12	55	84	74	30	64	14	16	9	10	4	74	113	102	68	139	33	6	7	20
LOC105222702	0	0	0	0	0	0	0	0	0	0.15	0	0	0	0	0	0.14	0	0	0	0.3	0	0	0	0.18	0	0	0	0	0	0	0	0	0	0	0	0	0	0	0	1	0	0	0	0	0	1	0	0	0
LOC105222703	0	0	0.05	0	0	0	0	0	0	0	0	0	0	0.14	0	0	0.03	0	0	0	0	0	0	0	0	0.04	0	0	0	0.03	0	0	1	0	0	0	0	0	0	0	0	0	0	3	0	0	1	0	0
LOC105222704	0	0.04	0.75	0.16	0	0.31	0	0.07	0	0	0.35	0.42	0.31	0	0.66	0.43	0.48	0.08	0.22	0	0.29	0.3	0	0.48	0.16	0	0	0	0	0	0	1	17	2	0	10	0	2	0	0	10	12	7	0	17	13	16	2	6
LOC105222705	1.59	0.13	6.87	0	0.41	0.63	0.22	0.81	0.32	0	0.08	2	7.6	0.82	2.58	0.86	9.36	1.96	2.31	1.63	0.91	1.1	0.74	0.2	0.43	2.07	0	0	0.04	0.16	29	3	137	0	8	18	6	21	8	0	2	50	150	17	59	23	275	45	55
LOC105222706	0.55	0.76	0.55	0.64	1.33	0.84	0.48	0.73	0.41	1.16	1.12	0.8	1.22	0.68	0.26	1.76	0.38	0.74	1.31	0.4	1.05	0.27	0.74	0.74	1.17	2.75	0.84	1	0.2	0.38	10	18	11	7	26	24	13	19	10	29	28	20	24	14	6	47	11	17	31
LOC105222707	0.13	0.03	0.19	0.28	0.04	0.16	0	0	0.12	0.15	19.55	0.09	19	0.11	0.07	21.52	0.03	0.17	6.85	0.18	0.15	0.16	0.14	0	16.13	23.38	0.25	0.17	0.06	0.17	3	1	5	4	1	6	0	0	4	5	637	3	488	3	2	750	1	5	212
LOC105222708	5.85	6.8	7.06	7.1	6.53	6.02	5.07	7.38	6.89	7.15	6.66	6.76	6.63	6.74	6.53	8.53	9.02	7.93	9.03	10.09	4.66	7.45	6.43	7.97	9.24	8.24	8.98	5.63	5.04	7.06	253.36	383.96	333.93	185.62	303.93	408.45	330	455.55	403.52	424.66	395.54	400.32	310.52	329.98	354.27	541.89	628.7	430.84	509.53
LOC105222709	10.13	12.13	12.69	8.58	8.74	14.1	12.36	14.52	14.02	14.39	10.59	9.61	9.5	9.35	9.99	12.87	12.43	11.39	12.46	13.02	8.75	10.97	7.58	9.27	8.4	11.29	12.47	13.16	12.52	13.16	411	636	552	206	384	900	741	835	771	806	592	533	413	416	504	777	803	581	653
LOC105222710	23.37	20.63	22.37	15.58	20.87	19.62	18.78	18.37	17.81	19.37	18.72	22.18	20.47	19.86	23.97	20.88	20.68	19.57	20.57	19.75	19.17	24.05	24.13	21.71	21.62	18.59	19.26	19.42	18.91	20.32	758	872	793	305	728	998	916	850	781	862	833	985	718	728	974	994	1080	797	870
LOC105222711	42.68	43.26	41.28	42.12	38.77	37.64	40.92	42.21	39.75	37.21	39.65	36.77	35.39	45.11	38.76	37.7	40.22	38.82	34.81	33.29	42.36	33.02	41.26	34.5	35.6	36.99	38.53	40.45	39.2	36.41	648	856	685	386	633	896	934	914	816	775	826	764	581	774	737	840	983	740	689
LOC105222712	6.87	6.61	7.36	6.28	7.32	7.17	7.47	6.89	6.33	6.18	6.29	7.26	6.05	6.68	7.23	6.06	6.19	6.33	6.16	6.53	7.11	6.79	6.73	6.33	6.45	5.82	5.49	6.36	7.01	6.22	194.64	244.04	228.07	107.38	223.07	318.55	318	278.45	242.48	240.34	244.46	281.68	185.48	214.02	256.73	252.11	282.3	225.16	227.47
LOC105222713	19.22	18.46	15.86	12.38	19.83	11.75	14.19	15.43	13.96	12.64	13.38	16.54	18.19	17.05	16.85	15.5	16.44	17.62	18.02	18.6	13.08	17.54	18.41	22.17	20.7	17.09	15.93	11.73	15.74	15.98	337	422	304	131	374	323	374	386	331	304	322	397	345	338	370	399	464	388	412
LOC105222714	46.84	47.83	50.42	51.08	48.19	55.83	52.83	56.95	52.41	53.86	49.73	53.06	50.54	44.76	51.04	54.45	54.6	51.38	54.33	55.47	47.96	49.27	46.28	47.69	49.91	55.29	52.86	58.38	52.21	52.61	1629	2168	1916	1072	1802	3044	2762	2823	2464	2570	2372	2525	1900	1759	2223	2779	3057	2244	2463
LOC105222715	0	0	0	0	0	0	0	0	0	0	0	0.12	0	0	0	0	0	0	0	0	0	0	0	0	0	0.06	0	0	0	0.05	0	0	0	0	0	0	0	0	0	0	0	2	0	0	0	0	0	0	0
LOC105222716	7.71	6.4	8.26	6.91	6.44	7.42	6.44	5.34	5.01	5.94	7.66	6.21	6.81	6.82	6.53	11.58	12	4.97	7.87	6.97	5.93	8.15	6.45	7.34	6.02	11.3	5.76	5.44	5.84	5.79	246	266	288	133	221	371	309	243	216	260	335	271	235	246	261	542	616	199	327
LOC105222717	24.79	20.24	25.75	19.03	19.93	17.88	16.12	18.23	15.28	17.59	21.87	15.86	23.03	16.24	16.94	25.39	20.83	17.16	20.83	15.13	15.75	24.94	31.77	17.63	18.9	24	16.24	16.9	17.02	17.26	451	480	512	209	390	510	441	473	376	439	546	395	453	334	386	678	610	392	494
LOC105222718	1.82	1.61	2.38	0	1.86	1.84	1.05	2	1.67	1.21	1.36	1.1	1.65	0.65	2.55	0.94	1.23	1.45	1.09	1.42	1.73	1.83	1.49	1.47	1.29	0.86	1.39	2	2.38	1.16	26.74	30.95	38.23	0	29.42	42.47	23.2	41.92	33.21	24.37	27.5	22.25	26.2	10.81	46.94	20.23	29.06	26.71	20.82
LOC105222719	4.12	3.38	3.2	3.35	3	2.76	3.12	3.49	3.39	3.13	3.43	3	4.12	3.45	3.36	4.55	3.93	3.74	3.43	4.04	3.35	2.99	3.56	3.7	2.66	3.93	3.48	3.11	3.03	2.82	128.26	137.05	108.77	63	100.58	134.53	145.8	155.08	142.79	133.63	146.5	127.75	138.8	121.19	131.06	207.77	196.94	146.29	139.18
LOC105222720	104.87	85.37	95.35	87.45	80.5	60.61	49.84	54.85	52.9	51.1	82.58	80.24	81.52	81.24	79.29	56.25	53.92	52.88	54.75	46.8	81	78.03	75.7	86.14	72.17	53.2	47.45	66.22	56.59	58.34	2234	2380	2228	1124	1840	2028	1600	1670	1520	1501	2421	2349	1881	1961	2119	1763	1853	1408	1512
LOC105222722	0.71	0.07	46.18	0.15	0.82	0.28	0.29	1.55	0.98	0	0.06	0.71	0.49	0.55	6.35	3.25	55.08	2.46	13.22	1.99	0.11	0.22	0	0.24	0.1	7.29	0.15	0.07	0.13	0.05	8	1	571	1	10	5	5	25	15	0	1	11	6	7	90	54	1003	35	195
LOC105222723	14.27	13.86	13.13	16.08	15.78	15.8	15.15	14.82	13.4	15.04	17.36	15.93	18.98	15.91	17.11	18.21	12.03	12.33	14.28	15.6	14.54	13.76	15.24	14.79	19.7	18.98	16.12	14.8	14.8	13.66	538	681	541	366	640	934	859	797	683	778	898	822	774	678	808	1008	730	584	702
LOC105222724	6.84	6.85	7.02	6.57	7.18	6.16	6.47	6.22	6.13	7.19	7.83	8.43	6.44	7.83	7.03	6.01	5.7	6.21	7.32	6.61	6.65	7.86	7.83	6.76	7.43	6.14	7.14	6.45	6.61	6.7	273	358	302	157	305	387	392	350	330	390	425	460	276	352	354	351	363	307	376
LOC105222725	0.24	0	0.11	0.4	0.11	0.23	0	0.25	0	0	0	0.09	0	0.43	0.29	0	0.15	0	0.09	0.09	0.14	0	0.27	0	0.27	0.19	0	0.09	0.18	0.07	2	0	1	2	1	3	0	3	0	0	0	1	0	4	3	0	2	0	1
LOC105222726	4.18	4.81	3.34	4.29	3.72	3.44	3.55	4.13	3.8	4	3.4	4.5	3.63	4.21	3.58	3.4	3.49	3.58	4.19	3.72	4.55	3.85	4.25	3.7	4.3	3.66	4.11	3.21	2.69	3.99	499	747	435	309	477	644	636	703	613	654	557	735	468	568	534	595	670	536	651
LOC105222727	1.27	0.55	1.03	0.6	0.65	1.54	0.73	0.74	1.16	0.87	0.88	0.77	0.5	0.66	0.99	0.77	1.42	0.88	1.27	1.13	0.6	1.41	1.04	1.32	0.86	1.64	1.97	0.63	0.5	2	47	35	55	19	28	75	39	56	65	42	46	39	17	47	40	65	83	65	81
LOC105222728	4.65	4.05	3.27	3.51	3.38	3.04	3	3.63	3.83	3.75	4.29	4.22	3.74	3.99	4.13	2.79	2.84	2.94	3.02	3.12	4.15	4.02	3.9	4.25	3.81	3.69	3.47	2.84	2.87	3.61	169	192	130	77	132	173	164	188	188	187	214	210	147	164	188	149	166	134	143
LOC105222729	0.14	0.36	0.26	0.23	0.04	0.03	0.09	0.23	0.1	0.07	0.17	0.1	0.26	0.58	0.19	0.03	0.09	0.22	0.32	0.27	0.22	0	0.31	0.25	0.05	0.11	0.35	0.04	0.1	0.16	3	10	6	3	1	1	3	7	3	2	5	3	6	14	5	1	3	6	9
LOC105222730	0.3	0.35	0.27	0.6	0.17	0.17	0.24	0.25	0.29	0.24	0.39	0.33	0.36	0.35	0.36	0.25	0.52	0.22	0.23	0.24	0.32	0.64	0.3	0.51	0.5	0.32	0.36	0.14	0.26	0.24	10	15	10	12	6	9	12	12	13	11	18	15	13	13	15	12	28	9	10
LOC105222731	0.62	0.87	0.49	0.95	0.71	0.44	0.43	0.43	0.67	0.45	17.89	0.89	18.18	0.89	0.88	18.23	0.57	0.55	6.59	0.62	0.81	1.01	0.95	0.75	16.91	30.54	0.43	0.55	0.36	0.37	26	48	22	24	32	29	27	26	38	25	1034	51	827	42	45	1127	39	29	360
LOC105222732	7.11	6.41	7.16	8.25	12.24	11	7.22	9.1	9.21	8.69	7.65	6.5	6.25	8.34	9.51	10.42	10.94	9.21	7.5	7.75	5.07	10.45	9.2	10.33	5.96	6.99	5.42	9.81	11.43	10.23	40	47	44	28	74	97	61	73	70	67	59	50	38	53	67	86	99	65	55
LOC105222733	3.78	3.04	3.62	2.34	2.68	0.8	0.65	0.54	0.98	0.76	2.42	2.29	3.38	2.23	2.16	0.77	1.13	0.76	0.94	0.62	1.86	2.11	3.49	3.6	2.71	1.28	0.88	0.77	0.47	1.02	123	129	129	46	94	41	32	25	43	34	108	102	119	82	88	37	59	31	40
LOC105222734	2.06	2.14	1.96	2.35	2.17	1.99	1.85	2.32	1.89	2.29	2.92	2.52	2.39	2.04	2.58	2.52	1.37	1.66	2.2	1.78	1.99	2.37	3.01	2.84	2.92	2.55	1.79	1.56	1.79	1.52	74	100	77	51	84	112	100	119	92	113	144	124	93	83	116	133	79	75	103
LOC105222735	0.08	0.02	0.02	0.13	0.14	0	0.08	0.04	0	0.02	0.13	0.15	0	0.05	0.06	0.02	0.08	0.1	0	0.09	0.06	0.1	0.09	0.02	0	0	0.09	0.04	0.11	0.07	3	1	1	3	6	0	5	2	0	1	7	8	0	2	3	1	5	5	0
LOC105222736	0.04	0.03	0.04	0.04	0.05	0.01	0.01	0.02	0.02	0.03	0.04	0.06	0.01	0.05	0	0.06	0	0.04	0.03	0.02	0.05	0.01	0.05	0.08	0.39	0.08	0.03	0.03	0.02	0.06	4	4	4	2	5	2	1	2	3	4	5	7	1	5	0	8	0	5	4
LOC105222737	0	0	0	0	0	0	0	0	0	0	0.02	0	0.17	0	0.04	0.05	0.02	0.02	0	0	0.06	0.06	0	0	0	0	0	0	0	0	0	0	0	0	0	0	0	0	0	0	1	0	7	0	2	3	1	1	0
LOC105222738	22.15	25.28	23.03	20.09	28.12	22.84	23.55	20.09	22.63	20.63	28.9	25.12	24.7	21.28	23.9	23.36	18.78	20.13	20.17	20.18	24.94	21.88	27.51	24.47	27.08	24.79	23.39	22.3	19.32	21.99	433	644	492	237	591	700	692	560	598	553	775	672	522	470	585	670	591	494	514
LOC105222739	0.87	0.61	0.99	0.84	0.27	0.83	0.1	0.76	0.38	0.42	1.06	0.9	0.67	0.9	0.58	0.54	0.72	0.35	0.67	0.63	0.78	0.82	0.65	0.52	0.24	1.28	0.37	0.69	0.37	0.54	12	11	15	7	4	18	2	15	7	8	20	17	10	14	10	11	16	6	12
LOC105222741	0.8	0.85	0.9	0.59	0.61	0.27	0.4	0.5	0.41	0.65	1.37	0.82	0.94	1.2	1.19	0.85	0.61	0.81	0.68	0.65	1.14	0.96	1.08	1.32	1.09	0.73	0.18	0.8	0.58	0.51	45	62	55	20	37	24	34	40	31	50	106	63	57	76	84	70	55	57	50
LOC105222743	0.86	0.36	0.26	0.63	0.18	1.52	1.01	0.87	0.77	0.9	0.14	0.07	0.18	0.59	0.61	0.58	0.41	0.53	0.58	0.21	0.23	0.36	0.53	0.17	0.32	0.15	0.16	0.07	0.42	0	9	5	3	4	2	25	16	13	11	13	2	1	2	7	8	9	7	7	8
LOC105222744	18.84	16.38	15.15	16.3	17.27	11.89	13.07	12.9	12.32	12.39	14.1	13.03	14.08	16.31	15.2	12.22	11.51	12.47	12.12	12.66	15.67	16.19	16.97	14.59	15.73	11.65	13.12	12.98	12.05	11.67	563	638	495	294	555	557	587	550	498	508	578	533	455	551	569	536	554	468	472
LOC105222745	18.51	19.23	20.07	20.02	21.02	24.57	18.14	19.06	18.37	20.31	20.11	25.16	20.76	18.93	21.29	20.41	17.93	17.36	19.47	22.16	18.68	23.06	18.66	19.41	22.12	23.95	22.12	19.14	21.35	15.79	403	545	480	261	494	841	600	598	538	609	607	753	491	470	580	659	635	476	556
LOC105222746	13.9	13.63	12.71	12.73	13.09	11.71	12.7	11.2	11.64	13.49	13.72	13.35	14.77	13.56	13.37	12.7	11.09	10.37	12.07	12.13	13.24	13.69	12.32	13.98	15.21	14.46	11.96	12.48	12.87	9.98	302	386	302	167	306	399	415	347	342	402	409	397	347	333	364	405	388	283	342
LOC105222747	16.52	17.21	18.3	15.67	19.15	21.34	17.93	15.63	19.63	17.02	18.49	18.15	16.63	18.08	16.99	16.27	16.76	17.31	17.21	19.34	17.98	19.99	16.53	17.51	18.97	15.69	16.52	19.12	18.42	17.92	362	491	438	207	451	733	590	488	581	511	556	544	394	448	466	523	591	476	491
LOC105222748	0.66	1.13	0.54	0.73	0.61	0.37	0.34	0.82	0.38	0.48	0.8	1.29	0.88	0.78	0.82	0.65	1.37	1.05	0.62	0.53	0.26	0.46	0.91	1.18	1.64	0.79	1.18	0.52	0.59	0.46	9	20	8	6	9	8	7	16	7	9	15	24	13	12	14	13	30	18	11
LOC105222750	12.59	10.68	11.01	11.2	10.1	7.96	10.12	9.28	9.08	8.84	13.01	10.5	12.81	10.02	9.44	11.53	8.68	7.56	10.24	8.56	9.63	9.94	9.39	10.18	14.55	12.66	7.8	10.03	8.86	7.96	250	280	239	136	218	251	306	264	247	242	354	289	274	225	236	339	281	191	265
LOC105222751	1.24	0.76	0.34	0	1.73	0.63	1.15	1.3	0.09	1.27	10.84	0.72	11.01	1.32	0.69	9.38	1.31	1.18	3.8	1.35	1.18	1.71	1.53	0.66	11.22	12.61	0.94	1.08	0.72	0.64	10	8	3	0	15	8	14	15	1	14	120	8	96	12	7	111	17	12	40
LOC105222752	0.33	0.17	0.1	0.33	0.19	0.24	0.19	0.3	0.21	0.26	1.59	0.07	1.94	0.18	0.07	2.79	0.18	0.18	0.96	0.49	0.08	0.25	0.15	0.16	2.51	2.4	0.21	0.19	0.16	0.04	15	10	5	9	9	17	13	19	13	16	98	4	94	9	4	184	13	10	56
LOC105222753	6.42	6.06	5.92	4.87	4.19	5.84	4.05	4.9	5.31	4.9	5.34	6.18	6.04	4.4	4.03	4.59	3.99	5.1	5.06	5.13	4.81	4.49	5.16	7.54	6.37	5.99	5.09	4.44	5.56	5.37	98	121	99	45	69	140	93	107	110	103	112	129	100	76	77	103	98	98	101
LOC105222754	14.78	13.54	14.14	11.65	13.58	12.12	11.65	11.94	10.93	11.07	15.21	13.68	15.74	12.23	14.75	11.29	9.38	11.4	9.82	10.06	13.11	13.05	9.89	11.32	11.64	13.8	12.06	12.19	12.44	10.66	217	259	227	103	214	279	257	250	217	223	306	275	250	203	271	243	221	210	188
LOC105222755	39.9	36.29	35.46	36.02	35.12	37.85	38.26	35.09	37.92	35.7	33.92	38.13	35.63	33.82	41.48	39.61	36.54	38.34	40.03	39.89	33.01	35.77	38.61	39.41	34.25	35.2	35.65	37.71	41.57	40.03	523	620	508	285	495	778	754	656	672	642	610	684	505	501	681	762	771	631	684
LOC105222756	55.46	50.97	51.04	50.03	50.32	48.26	50.12	50.27	53.83	52.68	48.14	47.88	52.01	48.57	58.06	46.62	53.09	52.44	51.4	56.07	47.57	58.92	49.55	55.42	50.12	48.75	53.42	53.07	47.3	51.94	865	1036	870	471	844	1180	1175	1118	1135	1127	1030	1022	877	856	1134	1067	1333	1027	1045
LOC105222757	78.95	86.86	77.15	81.3	90.99	114.75	106.96	93.25	96.83	94.7	82.73	103.51	90.17	79.53	96.23	99.38	88.22	85.45	92.87	109.28	79.82	102.84	92.59	82.28	96.68	98.85	110.69	95.2	104.72	82.35	1337	1917	1428	831	1657	3047	2723	2252	2217	2200	1922	2399	1651	1522	2041	2470	2405	1817	2050
LOC105222758	17.98	19.75	17.34	18.41	19.93	18.71	19.05	17.86	18.71	17.45	18.08	19.86	17.8	18.65	17.93	17.61	18.61	17.46	16.49	16.91	16.99	16.06	16.81	16.75	17.26	17.2	16.46	18.23	17	18.45	848	1214	894	524	1011	1384	1351	1201	1193	1129	1170	1282	908	994	1059	1219	1413	1034	1014
LOC105222759	11.54	12.51	12.51	11.84	12.32	11.99	11.62	11.86	9.76	10.73	11.75	12.54	14.8	11.08	11.56	14.23	12.25	11.91	13.21	11.4	12.99	15.88	13.67	11.57	14.25	11.81	12.87	10.16	13.51	9.94	189	267	224	117	217	308	286	277	216	241	264	281	262	205	237	342	323	245	282
LOC105222760	64.67	63.88	72.87	74.27	74.93	74.62	72.98	65.11	66.83	69.43	62.74	65.35	72.29	63.24	66.65	69.22	67.11	67.79	67.17	66.88	67.67	67.56	63.78	64.25	71.71	70.88	70.57	66.21	81.2	66.32	509	653	623	352	642	912	869	730	716	751	695	710	614	561	653	803	858	670	693
LOC105222761	4.76	6.42	6.15	5.16	7.32	5.54	5.67	5.41	5.94	5.8	5.5	6.35	5.92	5.95	6.48	6.54	5.55	5.55	6.04	5.72	5.75	7.07	7.38	7.4	7.97	5.94	4.72	6.47	6.11	5.1	58	102	82	38	96	106	104	94	98	97	92	106	78	82	99	117	109	85	96
LOC105222762	96.72	102.21	91.05	88.42	91.19	100.2	91.94	100.66	91	87.02	99.24	83.1	91.64	92.74	107.87	101.09	107.02	97.23	93.93	93.63	94.43	99.15	86.48	106.18	89.81	104.93	97.22	90.69	101.47	100.41	1233	1703	1320	662	1260	1929	1842	1905	1584	1688	1610	1546	1185	1278	1544	1961	2027	1638	1613
LOC105222763	0.02	0	0.14	0.09	0.05	0.08	0.09	0.12	0.05	0.03	9.31	0.05	9.51	0.08	0.04	15.67	0.08	0.11	5.35	0.06	0.06	0.18	0.14	0.05	11.78	8.28	0	0.07	0.03	0.16	1	0	9	3	3	7	8	10	4	2	734	4	593	5	3	1325	7	8	403
LOC105222764	157.82	159.45	146.4	144.26	149.78	148.77	133.32	153.79	147.36	149.57	147.91	139.08	139.37	154.37	168.12	150.28	136.74	153.29	139.12	146.48	142.64	150.78	145.5	157.72	148.73	130.78	136.58	169.34	147.84	137.94	2523	3322	2558	1392	2575	3729	3204	3506	3185	3280	3244	3043	2409	2789	3366	3526	3519	3077	2899
LOC105222765	7.42	7.65	8.46	4.89	7.86	6.46	4.51	4.92	5.43	6.8	7.79	5.36	7.97	6.21	7.64	6.57	6.09	4.95	5.69	5.79	7.3	8.08	6.91	6.06	8.28	6.57	4.12	6.85	6.23	6.15	93	125	116	37	106	127	85	88	92	117	134	92	108	88	120	121	123	78	93
LOC105222766	24.13	25.88	26.2	26.81	24.21	29.62	30.13	30.38	22.46	35.93	29.5	29.96	31.46	26.06	26.35	24.02	21.66	25.86	24.33	24.62	25.3	25.1	28.8	26.78	27.23	18.87	22.17	21.78	22.2	16.84	447	609	516	292	484	843	844	810	566	881	753	757	613	539	609	655	625	593	582
LOC105222767	8.77	7.22	8.19	5.1	7.2	6.14	6	6.22	6.63	6.12	11.81	8.28	10.85	7.17	6.56	10.07	6.72	6.84	9.27	8.18	6.63	11.12	7.91	7.92	12.23	13.26	7.08	6.1	6.24	6.98	218	242	231	79	208	246	228	223	235	221	407	283	303	199	219	377	277	227	323
LOC105222768	768.53	835.3	909.6	815.43	887.81	932.4	901.56	933.49	769.51	905.97	902.09	857.16	1017.39	941.23	888.34	851.71	970.79	953.66	886.81	817.25	961.36	951.41	962.64	835.27	880.43	930.71	807.16	927.29	909.69	801.48	15828	22571.1	20691.9	10351.9	19879.1	30272.3	27799.8	27486.3	21413.9	25798.6	25870.8	24482.8	22877.6	21943	23271.6	25976.2	32243.1	24451.5	23745.5
LOC105222769	4.36	7.83	7.01	11.03	8.29	4.35	3.46	3.58	2.73	3.11	15.42	10.24	11.58	10.11	14.53	4.17	3.42	6.2	4.69	4.6	6.77	3.88	8.39	5.67	12.32	4.89	3.56	3.79	1.84	3.45	125.02	292.86	220.06	191.13	255.93	195.7	149.25	146.69	106.14	122.43	607.15	402.17	359.39	327.98	522.42	175.83	157.94	223.46	175.52
LOC105222770	42.9	46.15	45.1	45.69	50.88	46.91	50.88	51.75	42.59	45.52	41.6	38.77	43.11	44.74	40.58	45.02	43.9	45.71	41.44	42.01	48.12	41.35	48.55	42.91	40.78	37.72	46	50.33	49.8	43.56	672	942	772	432	857	1152	1198	1156	902	978	894	831	730	792	796	1035	1107	899	846
LOC105222771	8.71	9.75	9.69	8.01	6.87	8.47	7.5	8.26	8.16	7.83	8.74	9.45	8.16	6.93	7.99	7.92	7.36	7.77	7.08	7.72	9.41	9.85	8.97	7.87	8.61	7.81	8.31	7.53	7.11	8.03	356.6	518.59	433.28	197.56	301.93	542.98	461.52	482.25	451.8	439.66	489.67	529.26	361.53	320.92	409.7	475.9	484.46	398.91	378.14
LOC105222772	37.65	33.73	34.76	34.44	32.14	32.83	34.82	36.05	33.95	33.1	33.89	33.78	33.08	33.98	32.68	31.78	33.09	32.77	33.7	34.97	33.48	35.94	34.75	33.75	33.54	33.33	34.22	31.03	31.14	34.04	1220	1434	1238	675	1125	1673	1699	1675	1492	1481	1510	1503	1164	1248	1333	1515	1734	1339	1429
LOC105222773	5.29	5.5	5.67	5.75	6.16	7.73	6.91	7.36	7.38	7.39	7.06	5.44	6.73	5.62	4.95	10.15	9.31	8.11	9.19	8.47	6.07	5.45	5.9	5.22	6.36	9.98	8.23	7.3	7.51	7.43	329	455	395	218	414	762	657	650	622	632	601	464	452	397	398	940	929	645	758
LOC105222774	4.07	5.56	5.29	4.49	5.8	7.1	7.34	7.11	7.46	7.86	5.14	6.25	4.38	4.78	4.47	10.7	10.42	9.53	12.45	12.28	3.21	5.86	5.84	6.44	7.32	12.16	12.07	6.73	6.01	9.3	162	301	249	107	281	485	429	453	466	485	287	351	204	220	222	671	745	511	724
LOC105222775	0	0	0.02	0	0	0	0	0.01	0	0	0.57	0	0.4	0	0	0.27	0	0	0.16	0	0	0	0	0.02	0.45	0.63	0	0	0	0	0	0	1	0	0	0	0	1	0	0	45	0	25	0	0	23	0	0	12
LOC105222776	0	0	0	0	0	0	0	0	0	0	0	0	0	0	0	1.01	0	0	0.06	0	0	0	0	0	0.09	0	0	0	0	0	0	0	0	0	0	0	0	0	0	0	0	0	0	0	0	19	0	0	1
LOC105222777	0	0	0	0	0	0	0	0	0	0	0	0	0	0	0	0.05	0	0	0	0	0	0	0	0	0	0	0	0	0	0	0	0	0	0	0	0	0	0	0	0	0	0	0	0	0	1	0	0	0
LOC105222778	45.74	49.53	52.08	47.09	50.52	36.68	45.5	36.59	40.13	43.06	49.1	49.59	37.65	43.69	43.38	39.79	37.61	37.26	36.8	38.49	41.01	48.12	38.47	48.43	38.36	36.15	39.48	46.74	37.09	37.05	618	872	769	384	734	777	924	705	733	798	910	917	550	667	734	789	818	632	648
LOC105222779	0	0	0	0	0	0	0	0	0	0	0	0.08	0	0	0	0	0	0	0	0	0	0	0	0	0	0	0	0	0	0	0	0	0	0	0	0	0	0	0	0	0	2	0	0	0	0	0	0	0
LOC105222780	6.7	6.52	5.54	6.69	8.45	6.91	6.29	6.33	4.44	5.89	5.38	6.21	5.36	5.41	5.22	5.68	6.37	5.5	5.79	5.33	3.73	5.58	7.05	6.27	8.6	5.73	5.26	5.57	5.86	5.04	126	160	114	76	171	204	178	170	113	152	139	160	109	115	123	157	193	130	142
LOC105222781	0.35	0.19	0.32	0	0.09	0.06	0.07	0.07	0.26	0.26	0.07	0.14	0.09	0.26	0.08	0.24	0.21	0.08	0.19	0.04	0.18	0	0.22	0.09	0.11	0.19	0.13	0	0.04	0.09	7	5	7.06	0	2	2.01	2	2.01	7.11	7.11	2	4	2	6	2	7.05	7	2	5.05
LOC105222782	4.71	4.61	4.85	6.08	5.4	4.81	4.62	5.29	4.47	4.44	5.53	5.29	3.76	5.22	5.55	4.9	3.85	3.91	4.03	4.25	4.19	6.33	4.91	4.3	4.99	3.9	4.87	4.38	4.71	4.34	95	121	106.94	74	117	151.99	140	151.99	121.89	122.89	153	146	82	119	140	144.95	125	99	105.95
LOC105222783	176.91	197.75	187.21	194.27	191.42	241.85	234.84	219.38	221.57	229.67	187.87	197.22	200.14	190.39	196.28	215.96	206.3	215.18	202.52	229.06	179.92	217.72	204.39	178.08	181.86	202.93	228.41	229.8	239.46	203.55	3650	5314	4219	2416	4246	7818	7279	6454	6178	6500	5311	5566	4460	4436	5066	6529	6851	5574	5440
LOC105222784	18.72	12.34	17.13	18.24	20.07	15.59	12.6	16.99	14.82	15.41	16.21	18.35	19.76	18.51	18.29	16.81	15.87	16.84	22.47	22.4	14.14	26.16	18.83	21.26	18.2	15.78	18.65	12.67	23	15.46	85	73	85	50	98	111	86	110	91	96	101	114	97	95	104	112	116	96	133
LOC105222785	5.53	6.69	5.14	4.15	6.5	6.22	5.86	6.18	5.68	7.49	6.11	6.12	6.95	4.89	6.07	6.12	5.2	6.67	5.37	5.71	6.47	5.94	7.29	5.02	7.62	6.98	5.63	5.58	6.06	5.76	64	101	65	29	81	113	102	102	89	119	97	97	87	64	88	104	97	97	81
LOC105222786	2.46	0.27	4.4	0	1.09	0.15	0.55	0.33	0.61	0.17	0.26	3.77	3.47	1.14	3.47	0.96	7.73	1.78	2.25	1.02	0.14	0.29	0.66	1.15	1.44	0.45	0.99	0.28	0.09	0.2	21	3	41	0	10	2	7	4	7	2	3	44	32	11	37	12	106	19	25
LOC105222787	23.85	23.2	26.46	24.17	24.37	21.4	22.16	20.48	22.36	22.86	24.86	24.58	25.83	23.97	23.58	21.79	20.62	20.46	19.73	21.51	23.96	24.94	23.75	23.63	26.02	22.66	23.72	19.49	22.01	19.52	819	1038	993	501	900	1152	1144	1003	1038	1077	1171	1155	959	930	1014	1098	1140	882	883
LOC105222788	0.14	0.18	0.18	0.04	0.02	0.03	0.25	0.12	0.11	0.03	0.02	0.19	0.02	0.13	0.31	0.18	0.06	0.1	0.18	0.21	0.23	0.18	0.08	0.02	0.11	0.15	0.16	0.02	0.17	0.23	6	10	8	1	1	2	16	7	6	2	1	11	1	6	16	11	4	5	10
LOC105222789	11.17	10.13	9.95	8.18	10.13	6.44	8.1	7.97	8.45	6.69	9.01	9.13	10.28	9.36	9.83	7.52	7.4	6.66	7.57	8.34	7.45	12.06	10.85	11.09	9.14	6.27	7.08	6.55	6.69	7.83	251.17	297	244.49	111	245	227	274	255.47	257	206.31	278	281	250	238	277	248.17	268	188	222
LOC105222790	52.19	52	49.49	49.42	46.5	74.38	62.37	74.79	68.66	78.12	53.84	54.23	53.74	47.58	51.55	80.23	76.64	83.04	82.77	83.82	44.67	58.43	53.37	56.63	62.58	92.09	68.67	71	81.39	68.81	734.83	954	761.51	420	704	1642	1320	1501.53	1307	1508.69	1040	1045	818	757	909	1657.83	1737	1468	1519
LOC105222791	96.96	157.21	260.18	115.35	128.47	76.41	102.56	91.44	64.16	107.38	194.64	147.36	136.97	149.4	166.37	74.57	65.41	106.85	76.39	55.99	159.43	175.9	246.6	194.66	165.87	59.39	72.08	66.03	58.05	51.19	1337	2825	3921	960	1905	1652	2126	1798	1196	2031	3682	2781	2042	2328	2873	1509	1452	1850	1373
LOC105222792	0.37	0.89	0.89	0.61	0.68	0.27	0.32	0.34	0.45	0.62	0.98	1.02	0.51	0.7	0.68	0.33	0.23	0.34	0.23	0.27	0.72	0.46	0.89	1.2	0.88	0.42	0.41	0.24	0.18	0.42	6	19	16	6	12	7	8	8	10	14	22	23	9	13	14	8	6	7	5
LOC105222793	0.03	0	0	0	0.07	0.04	0	0	0	0	0.08	0.05	0	0.09	0	0.69	0	0	0.27	0	0.04	0.04	0.04	0.03	0.04	0	0	0	0	0	1	0	0	0	2	2	0	0	0	0	3	2	0	3	0	29	0	0	10
LOC105222794	72.13	68.59	66.31	64.83	75.77	46.25	48.87	54.53	56.12	53.1	66.25	69.29	64.93	80.67	72.64	48.24	42.77	45.79	53.52	54.88	68.19	65.03	67.53	62.75	54.4	45.6	49.68	43.58	44.5	50.14	2929	3630	2943	1589	3309	2945	2983	3158	3081	2958	3691	3851	2851	3702	3694	2875	2796	2335	2833
LOC105222795	8.49	17.11	15.68	10.81	22.43	22.64	43.79	12.98	14.81	11.5	14.04	17.07	13.75	18.25	16.59	16.74	6.6	27.18	17.92	19.83	20.92	18.77	21.5	18.57	13.21	16.71	29.92	13.75	25.48	10.12	56	147	113	43	159	234	434	122	132	104	127	154	98	136	137	162	70	225	154
LOC105222796	0.43	0.88	0.53	2.87	1.07	5.51	2.59	1.82	2.35	2.1	0.84	0.63	0.67	1.4	1.61	0.98	0.72	1.15	0.88	1.99	1.37	0.9	0.65	0.13	1.13	0.67	0.37	0.91	0.42	0.58	3	8	4	12	8	60	27	18	22	20	8	6	5	11	14	10	8	10	8
LOC105222797	0.83	0.46	0.58	0.3	0.94	0.3	0.16	0.25	0.15	0.19	0.93	0.84	0.77	0.57	0.97	0.48	0.25	0.07	0.49	0.15	0.18	0.39	0.72	0.84	0.72	0.31	0.36	0.16	0.07	0.17	29.4	21.41	22.72	6.44	36.07	17.02	8.48	12.75	7.2	9.34	45.33	40.74	29.47	23.08	43.3	25.1	14.54	3.09	22.86
LOC105222798	35.48	35.41	27.74	24.14	31.44	26.85	31.58	32.9	36.76	28.25	29.06	32.54	27.53	29.67	31.78	36.9	34.03	34.31	42.89	41.82	30.5	32.85	28.3	37.07	32.23	33.08	36.82	29.89	30.24	40.74	509	662	435	209	485	604	681	673	713	556	572	639	427	481	571	777	786	618	802
LOC105222799	0.94	2.49	0.94	1.77	2.34	2.23	3.58	3.2	1.86	1.09	2.46	1.9	1.78	2.04	1.16	2.21	2.47	1.56	2.39	1.49	0.76	1.28	1.3	1.41	1.67	2.53	0.87	0.91	1.09	0.96	22	76	24	25	59	82	126	107	59	35	79	61	45	54	34	76	93	46	73
LOC105222800	10.72	9.93	10.12	11.65	11.84	12.47	13.56	13.32	13.02	13.6	12.07	10.42	9.08	10.47	9	12.71	11.72	12.53	10.84	8.74	13.24	11.05	9.24	7.4	8.01	11.79	10.84	12.89	12.15	11.93	154	186	159	101	183	281	293	273	253	268	238	205	141	170	162	268	271	226	203
LOC105222801	7.4	6.76	7.09	5.4	5.73	7.19	7.97	6.11	5.15	3.47	7.12	6.43	7.41	8.57	7.73	6.18	5.03	5.82	5.2	6.4	6.8	8.7	10.3	5.43	8.36	4.88	4.55	5.9	5.85	4.05	84	100	88	37	70	128	136	99	79	54	111	100	91	110	110	103	92	83	77
LOC105222802	19.18	15.9	15.74	15.12	17.05	13.91	13.29	14.05	14.38	12.91	29.56	19.1	30.83	16.14	16.8	23.24	11.94	12.4	15.01	13.34	17.65	20.19	16.88	20.02	28.8	34.9	10.22	12.85	11.1	12.76	457	486	421	218	440	485	461	449	430	419	867	609	735	424	467	722	437	357	430
LOC105222803	15.8	14.33	16.98	13.48	15.67	14.48	16.74	15.54	15.61	14.48	18.24	16	17.67	14.3	15.89	15.96	13.7	12.96	14.57	13.77	14.64	16.85	15.97	14.74	17.36	16.79	14.88	14.34	13.48	14.44	435	514	511	224	464	625	693	610	581	547	689	603	526	445	548	645	607	448	523
LOC105222804	0.03	0	0	0	0	0	0	0.06	0	0.04	0	0	0	0	0	0.02	0	0	0	0	0	0	0	0	0	0	0	0	0	0.03	1	0	0	0	0	0	0	3	0	2	0	0	0	0	0	1	0	0	0
LOC105222806	8.26	8.51	8.03	8.71	10.38	6.9	7.65	7.61	9.85	9.29	8.07	9.59	8.34	9.43	9.65	9.15	8.32	8.84	9.94	8.36	9.9	9.98	9.51	11.5	9.9	8.7	10.64	8.2	7.25	11.94	382	513	406	243	516	500	532	502	616	589	512	607	417	493	559	621	619	513	599
LOC105222807	15.44	12.89	14.91	13.97	13.63	11.9	12.84	15.59	14.01	11.67	11.15	11.23	12.23	11.45	12.1	12.18	11.68	12.41	12.72	11.58	12.32	14.75	12.7	11.88	11.26	10.85	12.22	12.85	14.46	10.73	216	235	228	118	205	261	270	311	265	224	214	215	185	181	212	250	263	218	232
LOC105222808	20.34	20.97	26.71	20.22	26.55	38.64	33.9	37.33	39.38	39.9	21.28	23.47	23.83	20.71	21.83	44.93	57.81	51.67	48.84	45.62	22.32	23.65	23.52	20.48	25.27	39.58	39.4	39.21	41.65	41.1	285	383	409	171	400	849	714	746	746	767	409	450	361	328	383	924	1304	909	892
LOC105222809	0.1	0.21	0.17	0.3	0.11	0.24	0.09	0.27	0.15	0.28	0.13	0.15	0.11	0.16	0.08	0.19	0.27	0.34	0.36	0.12	0.12	0.18	0.19	0.25	0.06	0.35	0.21	0.13	0.08	0.18	8	23	16	15	10	32	11	33	17	32	15	17	10	13	8	24	37	33	39
LOC105222810	0.65	0	1.07	0	0.12	0	0	0	0.68	0.29	0	0.48	0.6	0.12	0	0.18	0.24	0.94	0.3	0.09	0.78	0.16	0	0.7	0.44	0	0	0.1	0	0.15	5	0	9	0	1	0	0	0	7	3	0	5	5	1	0	2	3	9	3
LOC105222811	0	0	0.4	0	0	0	0	0	0	0.11	0	0.21	0	0	0	0	0.55	0.12	0.11	0	0	0	0	0	0	0.45	0	0	0	0	0	0	3	0	0	0	0	0	0	1	0	2	0	0	0	0	6	1	1
LOC105222812	52.27	48.02	54.27	62.81	54.74	66.25	71.04	62.37	60.41	60.89	54.54	51.75	49.06	54.1	52.31	56.44	61.22	55.65	56.14	59.62	57.97	50.49	51.69	53.31	51.55	57.13	60.8	61.69	60.53	58.47	1267	1517	1438	919	1427	2518	2589	2156	1980	2025	1814	1717	1286	1482	1588	2008	2389	1694	1774
LOC105222813	6.32	6.1	7.26	5.54	6.18	6.18	6.66	6.18	5.95	6.72	6.31	7.05	6.4	6.39	5.73	4.81	5.78	5.87	5.97	6.15	6.09	6.67	7.36	5.81	5.55	6.61	6.33	6.02	4.71	6.28	295	371	370	156	310	452	467	411	375	430	404	450	323	337	335	329	434	344	363
LOC105222814	175.18	164.55	159.8	163.4	168.25	162.95	152.1	170.82	159.93	172.76	173.85	161.03	174.74	168.64	178.51	166.83	153.09	159.94	155.28	154.8	162.29	158.85	171.54	160.47	159.24	152.66	148.37	183.65	162.85	154.02	2650	3244	2642	1492	2737	3865	3459	3685	3271	3585	3608	3334	2858	2883	3382	3704	3728	3038	3062
LOC105222816	171.74	202.09	218.84	216.94	196.29	184.55	181.41	201.69	191	199.45	226.51	209.68	201.89	205.65	231.29	206.14	205.54	200.26	191.77	186.73	199.73	184.98	210.45	190.29	195.08	194.55	192.37	198.27	180.32	204.87	6058	9290	8437	4619	7446	10207	9620	10146	9109	9651	10962	10123	7700	8198	10218	10672	11672	8870	8818
LOC105222817	23.86	24.82	25.99	24.56	22.61	20.02	20.36	22.47	20.33	19.84	22.82	21.63	20.28	22.83	23.48	20.24	20.13	20.42	19.5	22.01	21.51	21.8	26.88	21.27	21.28	17.8	19.92	20.11	21.53	19.26	594	800	702	365	606	779	765	789	680	674	775	730	542	634	728	733	805	631	629
LOC105222818	41.36	44.95	45.37	39.53	43.1	36.56	39.89	40.07	37.45	37.82	44.66	43.24	43.45	42.3	40.4	40.44	37.69	38.09	38.81	38.03	39.36	42.91	41.07	38.78	45.66	40.68	39.22	35.44	35.03	39.76	1175	1664	1408	678	1316	1628	1704	1623	1438	1473	1740	1681	1334	1358	1438	1687	1724	1359	1437
LOC105222819	0.21	0.1	0.08	0.07	0.16	0.11	0.45	0.15	0.03	0.15	0.12	0.28	0.08	0.15	0.03	0.23	0.13	0.1	0.35	0.18	0.1	0.05	0	0.08	0.19	0	0.18	0.13	0.18	0.19	5	3	2	1	4	4	16	5	1	5	4	9	2	4	1	8	5	3	11
LOC105222820	77.5	65.18	62.69	60.57	65.88	82.86	90.61	91.35	85.28	91.17	65.04	68.59	65.66	71.51	62.17	89.12	95.23	90.92	89.56	90.23	58.63	76.44	69.81	69.46	64.99	81.9	91.28	84.67	84.44	93.75	1501	1645	1327	708	1372	2516	2638	2523	2233	2422	1728	1818	1375	1565	1508	2533	2969	2211	2261
LOC105222821	10.28	8.77	8.14	9.52	9.66	8.4	8.21	9.45	9.04	8.5	9.95	10.08	9.08	8.94	9.65	9.67	9.38	9.49	9.26	10.48	9.08	10.25	11.15	9.1	10.29	8.42	9.61	8.39	8	8.13	646	718	559	361	653	828	775	847	768	733	858	867	617	635	759	892	949	749	758
LOC105222822	7.39	8.53	8.27	8.57	8.64	7.14	7.04	8.29	7.36	8.73	10.97	8.37	11.37	7.25	7.39	14.7	8.87	10.48	11.01	8.76	7.64	9.06	7.9	9.83	11.2	14.21	9.12	6.47	7.1	8.31	260	391	315	182	327	394	372	416	348	421	522	403	422	288	325	729	502	463	501
LOC105222823	1792.59	1837.78	1949.52	1930.69	1938.32	1489.71	1411.88	1499.49	1429.16	1454.51	1952.78	1916.21	1946.56	1919.67	2063.47	1165.64	1205.02	1213.76	1160.27	1197.24	1929.78	1865.89	1988.04	1795.66	1782.71	1167.89	1229.49	1366.16	1370.11	1278.08	28897	38608	34348	18786	33602	37653	34215	34471	31148	32164	43188	42277	33928	34972	41659	27578	31271	24568	24381
LOC105222824	25.35	43.44	46.31	35.59	38.34	30.37	29.21	33.04	30.88	35.53	38.02	43.91	49.3	34.99	40.96	37.35	39.78	41.34	38.03	38.81	40.97	33.95	48.54	38.14	48.35	36.51	38.16	35.19	28.1	40.99	1043	2315	2079	843	1708	1905	1745	1912	1679	1987	2136	2432	2194	1600	2080	2216	2612	2139	2015
LOC105222825	2.68	2.92	2.68	2.21	3.19	1.63	1.59	1.54	1.66	1.56	10.22	3.25	11.02	2.39	2.99	8.75	1.83	2.16	3.94	2.35	2.55	3.01	2.88	3.43	9.07	11.1	2.07	1.41	1.43	1.78	155	220	169	77	198	148	138	127	130	124	810	257	688	156	216	742	170	157	297
LOC105222826	64.65	59.63	58.4	55.49	59.52	54.96	65.83	71.24	71.02	68.84	58.84	53.69	53.77	66.79	57.49	74.27	81.15	61.36	73.06	69.83	59.46	59.61	60.92	57.84	53.94	64.48	64.94	74.33	59.16	75.44	2196	2639	2170	1135	2185	2955	3359	3442	3234	3149	2735	2480	1994	2573	2472	3704	4406	2619	3211
LOC105222828	15.82	14.32	13.34	10.22	11.95	12.48	10.69	10.07	12.53	10.96	14.22	15.1	12.43	12.11	12.23	13.77	11.08	10.14	10.33	9.57	12.17	13.28	11.93	13.93	14.35	11.46	9.78	9.2	10.16	8.71	282	330	260	110	229	344	281	256	302	268	344	367	237	244	273	358	318	227	240
LOC105222829	4.49	2.93	3.72	2.39	3.47	2.22	3.44	2.32	2.38	2.29	2.29	4.34	3.29	3.98	4.33	2.2	2.63	3.17	2.28	3.57	1.71	3.39	3.53	2.96	4.26	1.89	3.66	2.87	2.79	2.54	53	45	48	17	44	41	61	39	38	37	37	70	42	53	64	38	50	47	35
LOC105222830	79.98	82.06	80	67.18	78.98	64.84	65.01	66.99	66.92	66.47	81.18	83.21	87.84	75.63	81	60.2	57.92	59.01	59.29	61.56	87.04	86.64	82.02	75.4	77.67	60.67	63.48	59.4	56.77	60.24	1864	2533	2050	957	1983	2345	2266	2247	2117	2117	2591	2631	2188	1993	2361	2097	2215	1730	1815
LOC105222832	13.99	14.93	10.82	9.16	10.97	10.56	12.16	13.31	13.78	11.45	11.89	13.22	10.55	11.08	12.28	13.84	13.17	14.73	15.05	15.38	13.23	11.84	12.62	14.52	11.32	13.52	14.48	12.15	12.03	15.43	440	612	372	174	371	521	575	597	586	494	513	569	359	394	484	639	667	582	617
LOC105222833	34.99	38.32	40.38	32.61	33.49	36.55	36.58	36.53	38.7	38.53	27.6	29.29	28.82	37.44	31.52	44.71	57.94	43.5	49.37	46.97	32.57	34.47	37.3	33.01	32.52	47.21	39.88	43.28	32.41	42.68	2027	2887	2586	1142	2080	3286	3182	2994	3021	3063	2199	2305	1799	2459	2278	3786	5362	3127	3679
LOC105222834	71.36	2.14	7.74	1.91	25.31	27.17	0.32	76.01	17.93	0	1.05	26.35	29.27	18.55	0.77	136.7	178.58	91.84	115.25	75.17	3.77	54.59	0.32	24.33	34.05	61.35	0.24	1.14	0.35	1.27	742	29	88	12	283	443	5	1127	252	0	15	375	329	218	10	2086	2989	1199	1562
LOC105222835	0	0	0	0	0.03	0	0.02	0	0	0	0	0	0	0	0.05	0	0.02	0.08	0	0.02	0	0	0	0	0	0	0	0	0	0.02	0	0	0	0	1	0	1	0	0	0	0	0	0	0	2	0	1	3	0
LOC105222836	12.62	18.61	24.74	16.97	20.01	10.73	9.09	7.81	8.95	7.69	19.46	16.78	23.86	17.15	18.92	7.61	10.35	9.15	8.1	6.66	15.09	16.08	23.9	16.03	17.95	5.98	7.65	9.76	5.49	8.69	366	703	784	297	624	488	396	323	351	306	774	666	748	562	687	324	483	333	306
LOC105222837	19.74	18.47	20.35	16.77	18.65	13.16	9.67	16.58	14.77	14.36	18.28	16.72	18.7	18.94	19.47	13.69	16.44	16.81	15.65	14.9	19.2	17.47	19.61	20.89	18.19	12.37	15.46	13.05	10.6	15.07	1478	1806	1670	757	1505	1540	1067	1768	1479	1469	1879	1708	1540	1594	1845	1502	1989	1583	1534
LOC105222838	4.89	0	0	0.68	0	1.04	0	0.29	0	0.3	0.15	0	0.19	0.18	0.16	0	0.25	0	0.63	0	1.7	0	0.23	0.36	0	0	0.17	0	0.45	0	24	0	0	2	0	8	0	2	0	2	1	0	1	1	1	0	2	0	4
LOC105222839	49.32	40.83	40.73	37.48	39.75	51.9	51.94	56.46	45.25	57.63	41.31	37.99	37.57	42.03	34.77	46.45	47.26	48.04	53.88	49.25	51.04	37.1	46.45	35.66	40.75	45.21	49.02	44.2	39.53	44.05	811	875	732	372	703	1338	1284	1324	1006	1300	932	855	668	781	716	1121	1251	992	1155
LOC105222840	35.58	35.5	34.12	32.61	32.82	36.36	35.83	37.67	37.29	38	31.39	30.6	31.46	35.16	32.01	35.64	37.76	39.69	37.83	38.71	35.66	34.36	35.24	33.14	34.53	36.34	39.52	38.06	32.79	38.58	2095	2719	2179	1155	2072	3315	3148	3153	2941	3073	2515	2477	2006	2353	2318	3066	3559	2934	2896
LOC105222841	18.3	19.39	17.71	16.92	17.08	14.15	11.56	15.12	16.42	14.42	17.87	17.4	16.56	17.98	16.5	11.61	14.23	12.76	13.92	13.89	18.66	20.21	17.21	17.21	17.17	14.78	13.97	12.93	12.4	15.54	1321	1824	1397	737	1326	1600	1250	1557	1602	1428	1770	1718	1292	1467	1492	1230	1654	1156	1310
LOC105222842	8.63	9.09	9.89	8.11	9.52	11.85	13.54	14.07	11.56	12.02	9.5	10.09	8.56	11.21	9.88	10.98	12.29	16.05	10.79	10.72	10.27	10.44	10.22	10.18	9.37	10.23	11.84	12.45	11.44	11.52	210	288	263	119	249	452	495	488	380	401	317	336	225	308	301	392	481	490	342
LOC105222843	20.8	23	22.75	18.02	21.81	21.83	21.32	21.48	23.64	20.47	18.68	20.17	18.02	22.76	19.33	24.16	25.67	23.57	22.49	23.14	16.75	19.39	17.34	20.11	17.95	28.77	19.21	24.6	25.97	24.86	220	317	263	115	248	362	339	324	338	297	271	292	206	272	256	375	437	313	310
LOC105222844	6.69	8	6.58	7.76	7.88	8.11	7.12	6.8	8.16	7.07	7.92	8.06	6.5	5.67	5.88	7.18	5.75	6.84	6.37	6.03	7.89	7.6	8.78	5.73	5.98	7.51	6.23	6.77	6.96	6.48	120	187	129	84	152	228	192	174	198	174	195	198	126	115	132	189	166	154	149
LOC105222845	0.08	0.06	0.05	0.13	0.02	0	0.08	0	0.07	0	4.32	0.04	5.13	0	0.02	5.88	0.09	0.08	1.46	0.09	0	0.03	0.03	0.18	4.55	6.69	0.04	0.1	0	0.07	3	3	2	3	1	0	5	0	4	0	234	2	219	0	1	341	6	4	75
LOC105222846	0	0.04	0.02	0	0.04	0.04	0.04	0.01	0.07	0.03	0.02	0.07	0.13	0.04	0	0.08	0.12	0	0.18	0.06	0.02	0.02	0.03	0.07	0.03	0	0.1	0.02	0.03	0.09	0	2	1	0	2	3	3	1	4	2	1	5	6	2	0	6	8	0	10
LOC105222847	1.67	1.95	1.79	2.4	2.27	2.42	2.48	2.05	1.95	2.04	2.86	2.63	1.81	2.05	2	1.73	1.74	1.89	2.52	2.03	1.83	2.41	1.95	1.64	1.83	2.15	1.74	1.77	1.74	1.55	52	79	61	45	76	118	116	91	82	87	122	112	61	72	78	79	87	74	102
LOC105222849	8.03	8.99	8.91	7.62	7.95	7.51	6.65	6.95	6.81	6.82	11.29	9.79	9.61	9.41	9.37	9.33	7.6	8.61	8.69	7.15	8.91	8.68	10.03	8.9	10.1	13.99	7.61	7.1	5.01	7.65	463	675	561	265	493	679	576	571	531	539	893	772	599	613	676	789	705	623	653
LOC105222850	0.03	0.05	0	0	0.03	0	0.02	0	0.12	0	3.5	0	2.67	0.03	0	5.44	0	0	1.84	0.02	0.04	0	0.07	0	4.55	4.12	0.08	0.13	0.02	0.02	1	2	0	0	1	0	1	0	5	0	146	0	88	1	0	243	0	0	73
LOC105222851	0.52	0.47	0.48	1.01	0.32	1.17	0.41	0.73	0.77	0.76	0.38	0.96	0.32	0.69	0.49	0.53	1.25	0.97	1	0.82	0.83	0.65	0.49	0.47	0.39	0.4	0.74	0.41	1.53	0.8	6	7	6	7	4	21	7	12	12	12	6	15	4	9	7	9	23	14	15
LOC105222852	0.32	0.33	0.29	0.88	0.84	0.78	0.46	0.71	0.55	0.5	0.54	0.51	0.34	0.47	0.34	0.91	0.56	0.47	0.45	0.7	0.13	0.93	0.3	0.62	0.65	0.62	1.04	0.5	0.82	0.58	6	8	6	10	17	23	13	19	14	13	14	13	7	10	8	25	17	11	11
LOC105222853	33.83	32.33	45.81	33.28	41.34	37.11	43.14	34.34	36.67	36.81	40.06	38.86	34.34	35.88	38.96	32.87	33.3	35.74	37.19	37.48	38.77	41.15	41.14	36.29	40.78	31.99	33.71	28.59	35.68	32.88	554	690	820	329	728	953	1062	802	812	827	900	871	608	664	799	790	878	735	794
LOC105222854	0	0.02	0	0	0	0	0	0	0	0	0	0	0.02	0	0	0.02	0	0	0.02	0	0	0	0	0	0	0	0	0	0	0	0	1	0	0	0	0	0	0	0	0	0	0	1	0	0	1	0	0	1
LOC105222855	10.72	9.5	9.54	10.01	9.48	5.49	5.68	4.98	6.48	6.22	9.69	10.37	10.83	9.29	10.01	7.1	5.39	5.11	5.91	3.89	9.16	8.4	8.41	7.63	8.6	5.82	6.07	6.73	4.25	5.3	142	164	138	80	135	114	113	94	116	113	176	188	155	139	166	138	115	85	102
LOC105222856	64.82	61.52	62.65	58.74	62.95	58.85	62.35	59.44	58.94	59.83	65.55	61.25	67.93	62.44	67.45	59.95	59.86	54.07	58.14	58.27	61.17	64.63	62.86	64.51	65.3	56.05	55.45	56.52	61.02	59.26	1329	1644	1404	727	1388	1892	1922	1738	1634	1683	1844	1719	1506	1447	1732	1804	1976	1392	1554
LOC105222857	18.62	11.29	9.65	17.26	11.56	12.96	5.79	9.38	8.82	8.79	10.67	10.47	12.55	12.18	15.63	8.13	4	4.83	8.33	8.16	17.71	11.44	9.8	15.23	12.97	10.8	11.92	10.65	7.75	10.17	295	233	167	165	197	322	138	212	189	191	232	227	215	218	310	189	102	96	172
LOC105222858	5.29	7.22	5.51	3.9	4.78	3.19	7.04	4.43	4.89	4.39	3.96	4.62	3.81	3.9	4.46	5.81	4.75	5.97	7.44	3.63	4.19	5.7	3.97	3.68	3.28	4.98	6.1	4.98	6.01	5.58	36	64	41	16	35	34	72	43	45	41	37	43	28	30	38	58	52	51	66
LOC105222859	48.02	55.39	48.28	54.06	49.07	51.24	40.67	49.24	43.77	42.46	46.07	42.71	34.86	49.62	40.65	40.6	42.28	39.97	35.25	39.53	47.27	37.31	43.91	38.86	39.9	37.63	40.66	45.51	47.44	35.23	465	699	511	316	511	778	592	680	573	564	612	566	365	543	493	577	659	486	445
LOC105222860	2.03	1.11	1.25	1.46	0.86	0.9	2.58	2.13	1.56	1.12	199.57	1.19	202.94	1.05	0.98	208.64	1.42	1.47	63.13	0.83	1.2	1.05	1.14	0.79	200.26	308.12	1.49	1.11	1	1.01	46	33	31	20	21	32	88	69	48	35	6219	37	4984	27	28	6955	52	42	1869
LOC105222861	71.27	61.28	68.39	77.89	68.09	60.53	59.23	56.57	56.66	57.91	76.67	68.28	71.58	64.2	72.72	55.92	56.24	52.14	54.02	54	63.98	62.58	70.18	63.09	67.37	61.59	55.38	63.32	58.4	53.29	1587	1781	1673	1068	1646	2117	1979	1794	1708	1765	2349	2091	1719	1633	2026	1850	2031	1454	1566
LOC105222862	47.85	47.35	38.44	46.16	49.99	32.71	33.06	39.94	43.63	38	36.81	48.74	43.78	46.74	45.79	50	49.37	58.13	67.6	59.1	29.54	52.57	43.9	61.73	57.81	53.63	59.4	32.97	35.58	45.68	1319	1701	1158	768	1482	1414	1370	1570	1626	1437	1392	1839	1305	1456	1581	2023	2191	2012	2429
LOC105222863	6.87	5.07	6.32	4.79	5.62	5.98	6.2	6.62	5.78	5.44	8.6	6.4	9.3	5.19	6.38	8.56	6.32	6.69	6.7	5.1	5.93	5.75	5.84	5.91	8.86	9.93	4.47	6.6	4.83	5.79	233	224	234	98	205	318	316	320	265	253	400	297	341	199	271	426	345	285	296
LOC105222864	15.38	15.99	15.39	14.96	16.42	17.27	16.29	22.43	16.78	18.14	15.15	14.31	13.73	15.24	14.95	15.81	17.72	14.83	14.1	12.71	17.58	15.57	14.52	14.46	13.76	15.68	15.17	18.01	15.67	15.83	574	778	628	337	659	1011	914	1194	847	929	776	731	554	643	699	866	1065	695	686
LOC105222865	17.11	17.51	12.06	17.59	18.04	9.01	8.3	8.92	9.75	8.45	16.73	24.46	22.75	12.99	19.23	11.09	8.71	8.71	10.55	12.23	13.4	23.68	15.78	21.48	22.56	10.59	10.69	7.15	9.7	9.07	366	488	282	227	415	302	267	272	282	248	491	716	526	314	515	348	300	234	294
LOC105222866	0.08	0.15	0.17	0.15	0.17	0.05	0.2	0.18	0.16	0.22	0.2	0.05	0.22	0.15	0.12	0.26	0.33	0.31	0.25	0.28	0.09	0.28	0.11	0.15	0.15	0.38	0.16	0.17	0.13	0.25	7	17	17	8	16	7	27	23	20	27	25	6	21	15	13	34	47	35	29
LOC105222867	0.27	0.79	0.16	0.3	0.46	0.49	0.93	0.44	0.27	0.46	0.43	0.59	0.62	0.64	1.01	0.79	0.62	0.5	0.69	0.39	0.27	0.73	0.3	0.6	0.45	0.38	0.76	0.32	0.52	0.28	6	23	4	4	11	17	31	14	8	14	13	18	15	16	28	26	22	14	20
LOC105222868	176.46	186.14	179.82	187.33	176.76	195.72	206.07	193.86	198.23	210.6	171.25	160.52	170.09	189.5	175.93	186.88	189.16	188.27	179.82	185.56	199.54	152.27	180.3	161.62	169.28	179.17	184.31	217.87	216.57	194.05	1943	2671	2164	1245	2093	3379	3411	3044	2951	3181	2587	2419	2025	2358	2426	3020	3353	2603	2581
LOC105222869	35.32	32.37	34.29	33.43	33.36	30.34	26.77	28.44	30.01	30.13	32.31	33.42	36.15	31.92	38.9	34.92	33.82	32.2	31.86	33.87	26.86	35.01	31.97	35.97	36.59	32	33.29	27.91	29.99	32.12	667	791	705	380	666	891	757	767	755	783	838	864	731	680	907	966	1020	763	781
LOC105222870	16.58	13.49	16.79	17.95	15.42	14.38	11.98	14.42	9.81	13.13	13.53	13.41	14.62	13.11	17.83	13.33	14.69	10.3	14.84	13.89	9.99	14.1	15.79	13.73	13.95	17.54	13.94	16.29	14.05	12.59	150	159	166	98	150	204	163	186	120	163	168	166	143	134	202	177	214	117	175
LOC105222871	10.29	8.96	9.58	9.68	8.09	7.38	9.2	8.16	7.47	7.88	9.72	8.92	9.69	8.47	8.33	7.32	7.21	7.53	7.28	7.12	7.26	8.39	8.52	7.88	11.28	8.13	6.28	6.51	8.45	7.09	273	310	278	155	231	307	367	309	268	287	354	324	278	254	277	285	308	251	252
LOC105222872	16.52	15.09	16.38	16.26	14.37	15.04	16.91	14.6	13.44	16.49	17.05	14.15	14.79	16.25	16.84	14.24	15.31	14.23	14.82	16.18	13.22	17.45	14.23	14.08	14.34	14.94	16.88	15.41	14.51	15.06	431	513	467	256	403	615	663	543	474	590	610	505	417	479	550	545	643	466	504
LOC105222873	14.47	11.19	10.16	10.41	10.48	11.3	12.95	11.44	11.28	11.57	10.3	10.33	11.41	8.09	10.43	10.78	9.86	8.4	9.64	8.15	7.54	8.63	7.44	11.23	12.9	10.58	9.73	7.87	9.34	8.97	258	260	198	112	201	316	347	291	272	283	252	252	220	163	233	282	283	188	224
LOC105222874	14.24	14.63	12.5	10.69	12.7	12.61	10.32	14.59	14.62	13.6	12.5	14.02	13.12	12.6	14.44	17.51	17.08	17.96	19.31	18.37	10.78	15.26	14.58	18.19	15.06	16.17	18.65	13.15	12.82	21.3	245	328	235	111	235	340	267	358	340	321	295	330	244	245	311	442	473	388	433
LOC105222875	7.17	7.4	6.09	4.39	6.31	4.9	5.01	5.51	4.96	5.08	6.26	6.52	5.59	5.5	6.67	5.13	5.62	6.34	5.89	5.51	5.84	6.55	6.79	6.22	6.29	4.87	5.74	4.58	4.34	5.09	279	375	259	103	264	299	293	306	261	271	334	347	235	242	325	293	352	310	299
LOC105222876	22.3	20.86	21.35	22.06	22.77	25.63	26.83	32.16	26.62	25.72	20.11	17.89	21.5	22.48	19.78	25.5	25.35	26.06	23.8	20.99	22.22	20.42	21.37	21.78	18.53	24.23	27.44	25.59	22.28	25.4	777	947	813	464	853	1400	1405	1598	1254	1229	961	853	810	885	863	1304	1422	1140	1081
LOC105222877	1.19	1.17	1.56	1.5	1.1	0.39	0.76	0.9	1.3	0.9	0.62	1.21	0.88	0.46	1.18	0.81	1.21	0.19	0.87	0.52	0.9	0.77	0.59	0.93	0.85	0.7	0.4	1.35	0.94	1.09	25	32	36	19	25	13	24	27	37	26	18	35	20	11	31	25	41	5	24
LOC105222878	7.3	5.83	6	6.3	6.38	4.32	5.66	4.42	4.38	4.69	6.42	5.49	7.11	5.23	6.62	4.82	4.61	4.71	4.34	5.33	3.49	5.56	6.95	6.52	5.83	4.76	4.28	3.88	4.48	3.5	169	176	152	88	159	157	197	146	137	149	204	174	178	137	192	164	172	137	131
LOC105222879	26.63	30.69	30.44	27.71	35.46	43	43.22	46.71	48.44	47.59	32.11	35.82	34.85	30.59	35.03	39.62	43.64	43.72	46.86	46.17	34.57	33.9	31.76	37.56	31.73	43.72	52.85	46.92	44.87	44.93	761	1143	951	478	1090	1927	1857	1904	1872	1866	1259	1401	1077	988	1254	1662	2008	1569	1746
LOC105222880	53.03	70.69	72.64	57.52	64.02	72.08	67.7	64.04	69.91	67.81	60.48	56.63	60.73	64.09	68.56	61.01	64.03	61.01	56.71	63.66	63.04	58.34	60.43	60.82	55.66	58.09	62.58	75.61	71.28	57.01	533	926	798	349	692	1136	1023	918	950	935	834	779	660	728	863	900	1036	770	743
LOC105222881	22.74	22.9	21.44	19.94	23.62	50.32	51.93	55.25	49.32	51.96	23.31	20.55	19.85	20.93	18.74	57.79	65.16	59.93	57.74	52.76	20.15	24.24	20.71	22.16	23.66	61.59	49.57	53.57	43.9	43.43	820	1076	845	434	916	2845	2815	2841	2404	2570	1153	1014	774	853	846	3058	3782	2713	2714
LOC105222882	75.61	51.09	63.37	55.85	55.08	63.82	55.66	68.67	69.9	62.29	47.14	55.66	38.82	55.09	41.37	81.02	92.3	83.85	101.29	85.2	40.69	75.16	44.08	74.52	68.2	96.64	79.59	67.29	63.35	90.44	1633	1433	1506	730	1267	2096	1749	2049	2002	1788	1389	1651	908	1344	1122	2487	3100	2219	2763
LOC105222883	12.19	11.35	11.3	10	10.94	8.67	8.67	8.78	7.95	6.94	9.51	9.1	11.15	12.96	9	8.67	9.3	11.03	7.44	8.26	7.43	9.7	14.41	8.52	13.24	6.28	9.16	8.52	8.79	7.43	122	148.96	124	61	118	136	131	126	108	96	131	126	121	147	112	128	150.96	139	98
LOC105222884	16.51	12.26	13.71	14.66	13.05	14.14	15.61	18.31	14.83	14.7	11.69	13.36	12.65	13.9	11.4	16.55	15.85	13.15	13.57	12.46	12.96	12.24	11.94	12.44	10.14	13.4	15.38	14.6	16.37	13.23	140	136.04	127	75	119	188	199	222	170	171	136	155	116	135	121	206	217.04	140	150
LOC105222885	6.18	5.12	5.8	4.15	4.89	7.82	7.88	7.26	5.74	7.48	7.67	6.53	4.32	7.16	5.46	7.11	4.67	10.64	8.58	6.85	7.05	9.08	5.26	5.52	5.13	7.72	8.55	6.78	6.16	3.99	74	80	76	30	63	147	142	124	93	123	126	107	56	97	82	125	90	160	134
LOC105222886	0	0	0	0	0	0	0	0.05	0	0.05	0	0	0	0	0	0	0	0	0	0	0	0	0	0	0	0	0	0	0	0	0	0	0	0	0	0	0	1	0	1	0	0	0	0	0	0	0	0	0
LOC105222888	8.71	7.78	7.16	5.3	6.28	7.6	6.86	4.86	5.53	7.52	5.32	9.23	9.21	6.61	6.25	4.97	5.3	3.82	8.05	4.26	3.81	7.56	7.6	6.2	5.76	5.75	6.63	6.87	5.72	5.73	49	57	44	18	38	67	58	39	42	58	41	71	56	42	44	41	48	27	59
LOC105222889	31.8	28.01	27.75	27.72	28.79	20.33	20.93	23.85	25.62	24.95	24.64	29.77	30.72	25.34	30.83	27.24	29.52	30.21	34	31.27	22.1	33.67	29.19	37.74	35.3	26.32	29.47	18.89	22.6	24.31	917	1052	875	484	892	918	906	982	996	989	974	1176	959	824	1114	1155	1375	1100	1284
LOC105222890	35.21	30.01	31.13	33.47	30.16	30.3	30.81	35.56	35.67	34.6	28.06	34.71	28.26	31.28	28.85	36.78	40.27	38.44	43.49	41	29.13	38.31	29.48	36.92	37.97	38.51	39.18	30.04	31.15	39.43	1572	1746	1519	902	1448	2121	2068	2264	2153	2119	1719	2121	1364	1578	1613	2410	2894	2155	2531
LOC105222891	0.27	0.68	0.98	1.92	0.55	0.79	0.47	1	0.53	1.98	0.83	0.33	0.41	0.39	0.78	0.87	0.36	1.8	0.73	0.78	0.6	1.78	1.18	0.87	0.3	0.49	0.98	1.4	1.14	0.57	3	10	12	13	6.64	14	8	16	8	30.54	12.72	5	5	5	11	14.31	6.56	25.44	10.65
LOC105222892	90.11	84.91	73.4	79.2	77.29	68.78	78.52	100.88	87.92	78.5	46.48	54.71	59.05	83.48	60.43	101.03	103.01	123.92	134.11	104.4	54.91	68.38	60.19	112.43	85.96	95.11	112.54	81.37	74.38	119.44	3129	3863	2773	1652	2902	3662	4008	4843	4076	3732	2220	2654	2215	3263	2568	5084	5753	5427	6082
LOC105222893	15.42	18.36	13.91	14.79	15.73	16.98	17.71	17.54	18.93	18.58	14.3	15.55	16.03	14.65	13.68	19.59	17.35	18.31	17.12	17	17.03	12.2	15.65	15.12	14.38	16.15	19.07	16.24	17.17	18.6	297	461	293	172	326	513	513	482	493	491	378	410	334	319	330	554	538	443	430
LOC105222894	27.54	22.46	21.89	27.01	30.7	21.26	22.6	24.56	25.97	23.67	24.3	27.93	24.58	26.63	24.14	29.68	28.59	29.28	30.83	34.43	22.1	25.98	22.81	28.53	28.81	29.02	30.08	26.06	26.01	26.03	603	641	524	357	723	730	744	767	769	711	730	837	582	659	662	954	1008	805	880
LOC105222895	39.61	32.09	40.89	29.95	34.86	28.44	27.21	30.7	31.67	27.48	40.96	36.16	40.06	29.59	31.13	29.65	30.67	26.9	31.8	29.87	29.08	36.26	35.29	33.11	39.01	36.96	29.04	24.97	21.95	26.01	1878	1982	2118	858	1784	2116	1940	2079	2029	1788	2662	2349	2053	1587	1853	2065	2340	1601	1968
LOC105222896	17.5	20.01	21.07	19.67	23.1	19.28	18.36	20.43	19.33	21.17	20.68	19.44	16.1	18.31	17.4	19.46	21.33	21.68	22.46	23.31	22.84	22.83	26.49	19.26	23.54	22.07	23.53	17.97	19.54	24.52	367	547	483	249	521	634	579	611	548	609	595	558	365	434	457	599	720	571	614
LOC105222897	0.2	0.29	0.06	0.34	0.21	0.05	0.31	0.15	0.15	0.09	0.93	0.11	0.86	0.12	0.08	1	0.15	0.16	0.55	0.2	0.1	0.13	0.04	0.18	1.06	1.93	0.07	0.27	0.17	0.13	12	22	4	12	13	5	27	13	12	7	75	9	55	8	6	86	14	12	42
LOC105222898	11.17	10.12	12.07	14.03	8.39	7.85	8.98	8.83	6.64	7.03	9.31	10.28	9.82	8.77	10.66	5.59	6.34	6.28	5.95	5.58	12.59	12.47	10.92	12.27	10.04	6.1	6.61	7.19	5.11	5.09	460	560	544	345	369	507	552	520	370	398	536	583	438	415	562	344	420	327	324
LOC105222899	41.08	39.92	37.47	40.59	41.02	34.21	35.14	33.32	39.26	36.35	40.31	40.36	34.56	37.11	39.91	32.75	35.05	33.4	35.12	36.57	38.32	43.24	37.92	44.01	40	33.5	34.31	35.31	36.82	35.62	664	841	662	396	713	867	854	768	858	806	894	893	604	678	808	777	912	678	740
LOC105222900	38.41	53.83	60.14	41.46	56.13	63.98	64.24	73.91	59.74	66.56	51.3	54.06	59.4	54.15	59.32	57.65	71.32	77.13	64.84	65.6	67.53	45.29	55.38	52.52	56.37	60.84	65.07	68.6	51.82	63.99	2483	4535	4249	1618	3902	6485	6243	6814	5222	5903	4550	4783	4152	3956	4803	5470	7422	6261	5464
LOC105222901	11.01	9.67	12.04	9.39	9.84	14.75	17.62	16.17	19.33	14.43	10.7	13.68	11.23	10.47	10.48	22.5	27.02	20.71	24.6	24.42	10.38	10.8	10.64	9.41	9.87	20.48	17.85	21.93	16.98	21.25	781	900	933	408	750	1655	1885	1644	1871	1417	1056	1334	870	844	934	2367	3124	1861	2297
LOC105222902	706.1	597.56	752.63	731.65	745.52	558.76	466.87	500.56	478.68	486.01	631.68	622.2	676.64	675.4	768.81	399.49	433.1	449.26	382.66	435.12	685.59	724.84	706.65	669.96	634.72	380.52	426.07	534.86	547.04	451.67	3655	4031	4258	2286	4150	4535	3633	3695	3350	3451	4486	4408	3787	3951	4984	3035	3609	2920	2582
LOC105222903	108.95	49.42	62.93	40.77	55.24	23.56	23.69	23.55	18.82	21.63	42.84	34.75	51.55	43.2	53.86	17.59	18.83	18.62	16	21.37	49.37	59.17	107.65	41.63	37.43	17.65	15.62	24.35	23.35	17.19	1396	824	882	316	760	473	458	429	325	380	753	609	713	625	862	331	387	299	268
LOC105222904	48.42	43.18	37.33	50.13	60.45	42.47	48.55	38.12	40.88	39.2	42.01	48.45	46.11	46.07	47.22	35.28	47.71	28.16	39.26	45.76	43.01	56.01	38.3	37.02	42.5	46.29	45.78	48.27	44.87	36.6	773	896	651	487	1039	1069	1177	870	886	864	920	1056	803	833	942	827	1240	563	818
LOC105222905	1.12	0	0.68	0	0	0.24	0.74	0.78	1.1	0	0	0	0.34	1.97	0.3	1.52	0.46	0	2	0.54	0.44	0	0	0	0	0.29	0.94	0.88	0	1.5	3	0	2	0	0	1	3	3	4	0	0	0	1	6	1	6	2	0	7
LOC105222905_1	55.01	66.08	63.6	62.35	65.74	61.09	62.24	65.15	63.59	61.25	73.24	51.75	73.84	69.03	64.48	62.32	64.12	63.17	65.56	64.44	65.09	67.96	64.96	65.64	68.73	63.72	61.62	68.3	63.18	70.36	421	659	532	288	541	733	716	711	658	643	769	542	611	597	618	700	790	607	654
LOC105222906	104.97	100.68	113.33	86.69	112.67	86.41	89.22	81.74	77.18	84.42	87.76	82.33	100.55	120.42	109.71	57.51	75.26	83.66	71.8	79.08	108.16	94.07	145.3	88.85	96.4	67.47	69.55	80.21	74.86	77.78	1666	2058	1943	818	1926	2158	2104	1862	1631	1796	1896	1748	1707	2144	2138	1333	1895	1642	1504
LOC105222907	0	0	0	0	0	0	0	0	0	0	0	0	0	0	0	0	0	0	0	0	0	0	0	0	0	0	0	0	0	0	0	0	0	0	0	0	0	0	0	0	0	0	0	0	0	0	0	0	0
LOC105222908	0	0	0	0	0	0	0	0.01	0	0	0	0	0	0	0	0	0.03	0	0	0	0	0	0	0	0	0	0	0	0	0	0	0	0	0	0	0	0	1	0	0	0	0	0	0	0	0	2	0	0
LOC105222909	0	0.39	0.47	0.14	0.64	0.27	0.51	0.48	1	2.13	0.33	0.25	0	0.53	0.2	0.66	1.29	1.35	1.34	0.62	0.21	0.85	0	0.54	0.28	1.42	0.65	1.14	0.84	2.15	0	6	6	1	8.11	5	9	8	16	34.46	5.28	4	0	7	3	11.42	24.46	20	20.65
LOC105222910	8.51	6.61	8.11	7.82	8.31	7.35	9.25	7.59	6.95	8.09	8.2	7.36	8.63	7.56	8.04	6.98	7.25	8.76	7.48	7.63	9.11	8.52	8.38	7.39	6.77	8.69	7.3	7.89	8.03	7.61	240	243	250	133	252	325	392	305	265	313	317	284	263	241	284	289	329	310	275
LOC105222911	0.84	0.87	0.71	0.56	0.77	0.88	0.68	0.47	0.67	0.87	0.9	0.77	0.91	0.9	0.91	0.49	0.73	0.81	0.81	0.61	0.79	0.98	0.97	0.8	0.63	0.56	0.75	0.6	0.46	0.47	74	100	69	30	73	122	90	59	80	106	109	93	87	90	101	64	104	90	93
LOC105222912	0	0	0	0	0	0	0.1	0	0	0	0	0	0	0	0	0	0	0	0	0	0	0	0	0	0	0	0	0	0	0	0	0	0	0	0	0	3	0	0	0	0	0	0	0	0	0	0	0	0
LOC105222913	3.1	3.07	3.76	3.77	4.38	1.01	2.73	1.69	1.41	2.14	3.82	4.04	3.23	3.49	4.29	1.7	2.04	1.86	2.84	2.71	2.96	3.94	3.93	4.43	3.02	2.65	1.86	1.42	2.07	2.71	117	151	155	86	178	60	155	91	72	111	198	209	132	149	203	94	124	88	140
LOC105222914	2.7	2.58	2.95	2.52	3.52	4.07	3.22	4.08	3.57	3.55	4.99	3.85	4.54	3.03	2.93	5.62	4.03	3.91	4.64	4.91	3.18	3.48	3.23	3.13	4.33	6.92	3.88	3.27	2.99	3.28	320	390	376	187	446	752	548	671	587	586	838	622	589	412	440	998	782	587	722
LOC105222915	24.53	23.78	23.58	28.14	22.81	24.03	24.09	27.69	24.05	24.66	24.49	23.28	26.72	21.97	23.88	24.97	23.26	26.88	23.78	23.72	21.92	22.96	22.21	24.59	19.7	24.1	22.49	26.89	24.86	24.34	338	427	355	234	338	519	499	544	448	466	463	439	398	342	412	505	516	465	427
LOC105222916	22.17	20.95	22.41	25.46	23.79	21.65	17.04	16.15	17.48	16.42	20.16	21.16	21.36	24.09	26.31	15.23	14.43	18.27	15.87	15.04	17.97	21.71	19.79	22.01	21.5	14.68	16.82	17.1	14.68	16.68	321	395	353	220	365	491	367	334	340	324	402	418	329	389	470	321	334	331	302
LOC105222917	20.65	19.37	20.91	20.56	19.87	17.57	17.02	15.22	17.29	16.66	17.7	18.55	20.07	19.08	21.73	14.59	16.67	16.86	18.6	16.08	16.06	19.17	19.56	19.23	21.51	15.17	16.71	17.3	15.75	16.15	431	527	477	259	446	575	534	453	488	477	507	530	453	450	568	447	560	442	506
LOC105222918	19.95	17.12	18.42	19.92	21.2	20.19	20.12	17.63	19.92	21.11	20.21	22.27	19.65	18.66	21.19	18.35	18.93	19.94	16.91	20.25	19.44	21.94	19.45	19.31	21.05	19.88	22.63	19.41	21.13	17.67	489.65	547.55	493.98	295.08	559.6	776.86	742.29	617.18	661.01	710.75	680.4	748.21	521.38	517.61	651.46	661.16	747.75	614.49	541.04
LOC105222919	10.83	8.43	9.91	8.58	6.86	7.91	7.41	8.48	8.82	6.98	7.09	7.8	6.24	5.83	6.02	10.27	9.85	11	14.21	9.81	6.53	6.67	7.24	8.56	12.1	10.28	9.57	11.26	9.17	8.67	69	70	69	33	47	79	71	77	76	61	62	68	43	42	48	96	101	88	118
LOC105222920	2.77	2.53	4.31	2.99	2.14	7.79	5.78	7.29	9.32	7.15	2.79	2.74	2.23	2.62	2.34	10.2	12.02	9.56	10.97	11.97	2.47	3.4	2.22	3.27	3.47	6.98	8.82	9.62	9.51	9.96	58.35	69.45	99.02	37.92	48.4	257.14	182.71	218.82	264.99	206.25	80.6	78.79	50.62	62.39	61.54	314.84	407.25	252.51	300.96
LOC105222921	27.3	24.33	26.45	23.9	25.49	27.79	30.45	29.21	28.83	30.28	29.58	27.65	31.59	23.31	24.89	37.77	30.51	28.95	34.52	33.59	22.11	25.41	24.94	23.76	27.16	35.67	30.43	31.01	32.52	26.57	458	532	485	242	460	731	768	699	654	697	681	635	573	442	523	930	824	610	755
LOC105222922	66.96	68.57	66.53	63.4	66.72	64.58	66.07	67.14	70.37	71.2	65.07	70.53	68.4	70.02	66.47	67.29	67	64.64	64.59	69.92	65.49	70.95	68.51	64.42	65.3	65.24	68.49	66.27	65.39	66.97	3731	4968	4049	2131	3975	5640	5527	5333	5278	5438	4952	5375	4117	4371	4620	5474	6002	4514	4677
LOC105222923	0.4	0.43	0.8	0.53	1.33	0.81	1.38	1.12	0.47	0.47	0.99	1.75	1.4	0.14	1.02	1.36	0.59	1.46	0.67	1.27	1.42	1.3	1.17	0.78	1.6	0.92	0.47	1.38	0.52	0.18	5	7	11	4	18	16	26	20	8	8	17	30	19	2	16	25	12	23	11
LOC105222924	0.08	0	0	0	0	0	0	0.32	0	0	11.82	0	15.63	0.07	0	13.32	0	0.24	4.13	0.06	0	0	0	0	14.98	15.41	0	0	0	0	1	0	0	0	0	0	0	6	0	0	214	0	223	1	0	258	0	4	71
LOC105222925	16.6	15.03	15.84	14.2	13.52	15.33	14.76	16.21	14.65	16.61	15.7	13.6	14.8	15.6	14.3	12.57	13.21	14.3	14.53	16.67	16	14.92	14.59	15.28	12.12	13.04	11.16	13.22	14.27	13.33	306	361	319	158	268	443	409	426	365	420	397	343	295	325	330	340	392	331	349
LOC105222926	1160.96	1005.07	1195.59	1296.52	909.82	2511.78	2310.56	2145.31	2131.82	2189.71	1143.71	1087.92	960.59	1054.35	740.77	2443.76	3004.15	2135.38	2450.15	2409.88	993.97	1131.43	893.81	1037.18	1146.07	2713.2	2056.57	2670.86	2302.92	2229.32	33684	38040	37918	22706	28407	114227	100778	88775	83639	87143	45524	43212	30143	34591	26938	104032	140239	77777	92646
LOC105222927	90.39	78	75.73	83.47	86.05	65.83	79.59	71.99	79.24	78.28	70.67	77.33	74.99	71.41	75.16	76.29	70.46	70.67	73.28	72.39	67.37	75.19	69.24	76.67	76.88	71.68	76.52	84.51	78.5	72.49	1064	1188	971	597	1086	1220	1402	1213	1258	1265	1140	1240	956	951	1113	1319	1342	1052	1124
LOC105222928	42.07	46.13	46.73	40.15	44.24	43.38	45.58	44.19	44.44	43.48	43.64	40.39	43.23	46.32	40.22	42.74	41.92	41.54	37.13	41.31	42.36	44.11	44.66	43.69	43.85	40.89	40.82	41.57	40.24	39.44	1321	1888	1604	761	1494	2136	2152	1979	1887	1873	1880	1736	1468	1644	1582	1970	2119	1638	1520
LOC105222929	56.39	58.48	60.04	55.82	56.72	87.28	78.04	69.21	76.13	73.34	66.7	57.34	64.79	64.23	53.03	78.51	76.23	68.64	73.14	69.78	61.44	54.19	56.07	54.86	54.13	86.89	69.36	74.53	80.56	68.46	1436	1942	1663	859	1554	3488	2981	2514	2626	2557	2336	2001	1786	1852	1693	2939	3129	2198	2427
LOC105222930	392.82	323.17	295.68	304.19	357.82	345.17	431.7	425.93	362.01	376.51	267.72	264.5	283.89	333.04	284.25	305.76	327.71	398.42	328.32	365.57	370.76	299.59	312.59	312.01	255.33	319.04	325.24	414	410.05	360.24	4895	5248	4027	2288	4795	6744	8087	7569	6099	6436	4577	4511	3825	4690	4436	5592	6574	6234	5333
LOC105222931	12.72	11.52	13.35	12.09	10.27	15.02	14.42	13.01	14.34	12.77	10.64	12.34	16.97	15.31	17.81	8.1	16.7	10.79	14.71	11.96	10.66	13.03	14.77	12.11	11.87	8.67	8.12	8.87	12.03	13.31	61	72	70	35	53	113	104	89	93	84	70	81	88	83	107	57	129	65	92
LOC105222932	501.75	503.67	520.24	474.26	524.11	457.8	422.93	458.82	404.31	425.72	475.23	511.2	423.4	513.57	480.43	329.02	405.58	416.18	377.37	384.25	521.58	499.33	492.16	418.17	454.8	340.26	423.81	425.09	480.51	441.69	4338	5675	4916	2475	4873	6206	5497	5657	4726	5049	5637	6049	3958	5018	5202	4175	5645	4518	4253
LOC105222933	95.89	97.7	94.4	106.77	107.94	126.29	124.8	96.44	107.27	114.3	98.35	117.07	92.34	94.61	116.21	90.16	121.07	124.37	107.66	120.23	100.38	121.31	118.27	97.24	92.55	97.92	129.13	127.21	108.74	130.75	921	1223	991	619	1115	1902	1802	1321	1393	1506	1296	1539	959	1027	1398	1271	1872	1500	1348
LOC105222934	0.48	0.18	0.22	0.39	0	0.46	0.48	0.5	0	0.17	0	0	0	2.53	0	0	0.3	0	0	0	0	1.19	1.07	0.64	0	0.18	0.4	0.19	0	0	2	1	1	1	0	3	3	3	0	1	0	0	0	12	0	0	2	0	0
LOC105222935	39.12	31.77	44.29	42.66	33.8	40.54	30.9	37.83	24.35	34.22	31.12	36.68	40.7	38.65	52.97	17.88	28.75	26.35	23.38	21.43	29.06	29.95	54.08	36.85	35.13	16.57	17.52	20.3	23.93	21.66	240	254	297	158	223	390	285	331	202	288	262	308	270	268	407	161	284	203	187
LOC105222936	1.74	1.85	1.23	1.95	2.34	5.43	2.35	3.38	2.61	2.61	1.1	1.15	1.81	1.83	2.91	3.24	2.12	1.78	2.1	0.89	1.4	2.03	1.89	1.7	1.31	3.19	0.9	1.32	1.31	1.42	31	43	24	21	45	152	63	86	63	64	27	28	35	37	65	85	61	40	49
LOC105222937	24.58	14.54	21.87	20.66	22.37	21.47	11.61	18.62	10.68	17.77	18.79	16.74	24.36	17.03	28.02	9.13	16.09	18.26	11.86	16.26	20.4	23.26	38.49	15.79	14.35	7.41	9.9	11.38	15.36	15.03	111.61	86.03	108.51	56.61	109.25	152.84	79.26	120.56	65.56	110.67	117.02	104	119.57	87.39	159.33	60.86	117.61	104.09	70.17
LOC105222938	2.29	2.07	2.85	5.17	5.03	3.45	6.92	8.75	5.85	7.28	2.12	3.5	2.69	8.1	1.49	3.83	7.23	5.96	6.06	3.47	2.97	2.6	6.32	2.6	2.55	4.97	4.4	4.75	4.71	6.7	11	13	15	15	26	26	50	60	38	48	14	23	14	44	9	27	56	36	38
LOC105222940	0.12	0	0	0	0	0	0.08	0	0	0	0.08	0	0	0	0	0	0	0	0	0	0	0	0	0	0	0	0	0	0	0	1	0	0	0	0	0	1	0	0	0	1	0	0	0	0	0	0	0	0
LOC105222941	0.26	0.3	0.24	0.64	0.12	0.25	0.26	0.36	0	0.09	0.09	0.09	0.24	0.11	0.1	0.09	0.24	0	0.2	0.28	0.15	0	0.15	0	0	0	0	0	0.19	0.07	2	3	2	3	1	3	3	4	0	1	1	1	2	1	1	1	3	0	2
LOC105222942	0.34	0	0	0	0	0	0	0	0	0.25	0	0	0	0	0	0	0	0	0	0	0	0	0.38	0	0	0	0.58	0	0	0	1	0	0	0	0	0	0	0	0	1	0	0	0	0	0	0	0	0	0
LOC105222943	20.06	18.8	18.48	21.37	20.96	22.1	24.79	23.21	21.97	21.66	21.18	20.47	16.03	23.4	19.66	19.71	22.01	23.66	20.19	23.66	19.83	16.13	20.22	19.45	20.66	20.07	23.94	23.73	21.6	21.59	154	188	155	99	173	266	286	254	228	228	223	215	133	203	189	222	272	228	202
LOC105222944	0.41	0.19	0.9	1.35	0.23	3.23	5.27	1.55	5.07	3.27	0.36	0.36	1.13	0.87	0.39	2.95	1.37	1.95	1.69	2.55	0.39	0.71	1.19	0.29	1.09	3.58	0.97	1.87	2.15	1.93	5	3	12	10	3	62	97	27	84	55	6	6	15	12	6	53	27	30	27
LOC105222945	21.33	23.95	22	19.69	23.46	11.79	11.88	12.45	12.29	12.58	20.07	20.94	24.42	21.92	22.65	8.71	11.44	9.04	9.01	10.24	23.07	19.78	22.49	20.52	21.37	9	10.13	9.98	10.53	9.66	437	640	493	244	517	379	366	364	340	354	565	588	541	508	582	261	377	233	241
LOC105222946	7.06	6.25	5.47	5.6	7.17	4.54	4.28	5.58	5.1	5.22	5.32	6.33	6.4	6.46	5.38	6.89	6.97	7.04	8.75	8.15	5.12	7.81	6.05	8.05	8.06	6.9	6.55	4.28	3.72	6.99	846	976	717	405	924	853	771	954	826	858	875	1038	830	875	808	1212	1345	1060	1368
LOC105222947	0	0.18	0	0	0.09	0.03	0.09	0	0.07	0	0.03	0	0.04	0.08	0.07	0	0.31	0.04	0.04	0.17	0.11	0.23	0	0.04	0	0.14	0.04	0	0	0.03	0	5	0	0	2	1	3	0	2	0	1	0	1	2	2	0	11	1	1
LOC105222948	2.17	1.66	1.17	1.69	0.95	31.8	13.15	16.63	23.2	66.46	1.02	2.24	0.83	4.06	13.24	39.44	1.98	21.02	35.31	69.27	3.34	0.48	0.57	0.8	0.71	11.3	100.94	13.57	7.26	19.51	17	17	10	8	8	391	155	186	246	715	11	24	7	36	130	454	25	207	361
LOC105222949	6.49	4.6	6.85	4.14	5.57	5.57	5.48	5.6	4.25	3.64	8.55	4.01	8.08	5.52	5.38	6.12	4.34	8.95	5.94	5.08	7.12	5.93	5.34	5.13	3.62	5.19	4.65	4.53	5.47	4.74	26	24	30	10	24	35	33	32	23	20	47	22	35	25	27	36	28	45	31
LOC105222950	5.48	4.53	4.28	3.1	4.9	5.07	3.36	4.59	4.62	4.71	4.58	4.13	3.77	3.65	4.1	4.26	3.35	5.01	4.86	4.29	3.84	5.52	5.11	4.9	3.89	4.12	4.14	3.78	3.38	3.67	129	139	110	44	124	187	119	154	147	152	148	133	96	97	121	147	127	148	149
LOC105222951	3.19	3.34	2.94	2.23	2.59	2.43	2.48	2.21	2.79	2.3	2.95	3.12	3.5	2.39	2.81	3.61	3.08	3.14	3.51	2.77	2.96	4.01	2.03	2.81	4.33	4.19	2.78	1.93	2.71	2.54	82	112	83	35	72	98	96	81	97	81	104	110	97	70	91	137	128	102	118
LOC105222952	19	16.13	15.57	17.48	17.88	12.9	14.74	15.01	15.49	13.8	16.79	17.81	17.33	15.16	17.91	17.15	14.41	15.22	18.81	16.62	14.35	19.95	15.46	18.79	20.03	18.22	15.09	12.7	12.99	15.01	499	552	447	277	505	531	582	562	550	497	605	640	492	450	589	661	609	502	644
LOC105222953	7.64	5.83	5.48	5.91	6.5	4.84	4.16	6.62	6.8	6.44	5.11	6.93	6.11	6.61	5.09	8.35	9.65	10.87	12.66	11.36	3.73	8.95	5.82	10.77	8.93	8.52	9.02	4.66	5.39	7.69	319	317	250	149	292	317	261	394	384	369	293	396	276	312	266	512	649	570	689
LOC105222954	0.74	0.45	0.56	0.25	0.43	0.52	0.49	0.71	0.62	0.28	0.67	0.69	1.15	0.63	0.63	1.06	0.6	0.49	0.89	0.37	0.39	0.22	0.4	0.41	1.59	1.35	0.75	0.64	0.41	0.64	29	23	24	6	18	32	29	40	33	15	36.17	37	49	28	31	61	38	24	45.64
LOC105222955	14.33	12.96	14.28	12.49	14.14	12.58	15.22	12.93	14.73	11.97	13.59	13.57	14.63	12.33	14.29	13.3	13.63	13.56	12.8	13.44	9.84	15.57	12.19	12.51	13.68	16.07	13.62	14.91	15.14	11.61	213	251	232	112	226	293	340	274	296	244	277	276	235	207	266	290	326	253	248
LOC105222956	2.77	1.43	1.38	1.66	1.11	1.09	2.24	0.82	0.98	1.25	13.69	3.28	12.43	1.47	2.54	12.92	0.92	1.13	2	3.83	1.03	0.51	1.8	1.61	12.78	13.64	3.1	0.97	1.26	1.32	24	14	15	7	10	11	25	9	11	12	125.83	31	86	14	24	126	11	11	17.36
LOC105222957	0	0	0	0	0.06	0.08	0.04	0	0	0	0	0	0.06	0	0	0.04	0.04	0	0.1	0	0.31	0.08	0	0.12	0.07	0.3	0	0	0	0.04	0	0	0	0	1	2	1	0	0	0	0	0	1	0	0	1	1	0	2
LOC105222958	35.11	36.25	35.13	29.85	36.31	31.16	30.06	33.44	36.08	30.78	31.22	31.84	38.84	35	33.44	38.1	36.01	37.73	34.29	35.7	29.25	37.33	34.71	39.16	30.29	36.36	35.66	32.51	36.02	35.07	593	747	627	302	619	804	743	789	785	686	684	728	661	643	698	924	964	786	741
LOC105222959	37.31	33.39	30.97	31	39.24	28.81	33.7	30.59	26.89	30.76	31.97	27.78	35.5	33.23	31.88	28.75	29.47	29.33	28.8	29.26	33.87	33.98	35.53	32.71	30.88	26.63	30.17	30.35	36.57	29.14	313	365	284	157	354	379	425	366	305	354	368	319	322	315	335	354	398	309	315
LOC105222960	3642.58	3437.11	3469.13	3617.31	3368.21	3682.71	3897.02	4014.84	3744.34	3859.85	3260.79	3081.31	3102.18	3628.54	3203.47	3358.98	3358	3365.33	3205.28	3320.28	3869.49	2882	3328.37	3188.43	3008.28	3128.35	3418.75	3871.98	4135.91	3651.07	54046	66460	56257	32396	53743	85674	86923	84950	75112	78561	66377	62572	49767	60843	59527	73146	80207	62697	61993
LOC105222961	18.12	12.77	14.09	12.99	16.97	13.82	14.43	16.56	14.92	16.09	11.68	13.71	13.21	12.97	12.51	16.94	22.12	25.53	26.31	24.73	10.16	16.56	15.04	21.58	17.99	19.27	18.48	13.53	13.04	19.76	664	543	501	260	659	732	789	814	671	788	539	631	521	503	551	876	1195	1069	1193
LOC105222962	12.42	13.64	11.3	11.63	12.42	9.93	10.98	12.14	11.55	11.02	12.08	13.47	13.41	10.36	11.65	12.55	13.22	13.28	12.61	12.82	11.53	13.02	11.34	14	13.04	12.12	10.68	9.15	10.4	11.05	520	744	517	294	559	652	691	725	654	633	694	772	607	490	611	771	891	698	688
LOC105222963	0.15	0	0.03	0	0	0	0.31	0.17	0.08	0.08	0.26	0.05	0.23	0.03	0.03	0.2	0.03	0.27	0.14	0.04	0.17	0	0.04	0.04	0.56	0.38	0.08	0.04	0.05	0.02	4	0	1	0	0	0	13	5	3	3	9	2	6	1	1	8	1	7	5
LOC105222964	24.66	23.39	20.68	21.74	22.88	21.65	22.33	22.22	22.59	20.4	23.74	23.73	24.65	22.37	22.39	25.12	25.02	24.14	27.28	25.54	20.09	28.15	23.23	27.41	26.64	24.78	24.34	20.05	21.15	23.09	2027	2506	1858	1079	2023	2791	2760	2605	2511	2301	2678	2670	2191	2078	2305	3031	3311	2492	2923
LOC105222965	95.14	78.32	91.07	66.03	69.82	45.72	46.77	50.56	56.61	48.79	67.65	76.44	86.37	82.94	75.6	49.16	47.99	46.79	49.38	49.87	83.8	81.11	96.04	81.86	73.16	45.63	48.42	46.83	41.57	55.22	7289	7815	7619	3053	5747	5480	5383	5518	5859	5119	7106	8012	7166	7177	7245	5521	5917	4501	4925
LOC105222966	28.11	24.16	28.08	23.62	25.08	22.89	19.36	23.69	24.96	23.47	24.73	22.93	25.45	20.62	19.91	28.09	30.43	22.6	24.86	22.48	21.85	25.3	17.98	22.3	27.07	30.28	22.8	20.19	20.73	24.08	1676	1914	1795	831	1579	2086	1746	1991	1980	1879	2011	1867	1623	1426	1493	2376	2797	1683	1932
LOC105222967	1.84	1.89	1.55	2.17	1.83	1.21	0.8	1.09	1.09	1.24	8.79	2.58	9.91	1.61	2.22	11.71	0.98	1.1	5.36	1.55	1.51	2.75	1.94	3.31	8.85	13.16	1.79	0.67	1.03	1.15	62	84	56	44	67	59	41	53	50	57	409	119	364	62	92	589	53	47	239
LOC105222968	0.4	0.25	0.44	0.13	0.19	0.26	0.32	0.14	0.39	0.26	20.45	0.29	20.25	0.14	0.13	33.02	0.2	0.48	11.49	0.44	0.19	0.2	0.18	0	36.28	38.6	0.17	0.1	0.32	0.32	10	8	12	2	5	10	12	5	13	9	697	10	544	4	4	1204	8	15	372
LOC105222969	0.26	0.31	0.18	0.4	0.31	0.11	0.22	0.13	0.11	0.1	0.38	0.65	0.35	0.36	0.8	0.2	0.12	0.11	0.11	0.03	0.31	0.21	0.3	0.13	0.51	0.3	0.18	0.11	0.02	0.12	11	17	8	10	14	7	14	8	6	6	22	37	16	17	42	12	8	6	6
LOC105222970	4.12	2.14	5.44	7.27	2.94	9.45	8.05	6.68	8.71	8.27	1.05	1.52	1.44	4.36	5.26	2.99	4.29	3.75	3.65	4.47	4.07	2.81	3.49	1.29	2.03	2.39	1.45	1.18	2.5	0.65	77	52	111	82	59	277	226	178	220	212	27	39	29	92	123	82	129	88	89
LOC105222971	19.83	9.18	19.47	43.46	15.68	48	41.33	39.88	47.48	48.78	6.48	6.09	8.5	22.36	22.49	14.87	17.42	13.86	15.77	20.19	13.08	12.02	12.71	5.67	7.22	7.82	9.72	5.24	13.77	6.09	328	198	352	434	279	1245	1028	941	1062	1107	147	138	152	418	466	361	464	288	340
LOC105222972	0	0	0	0	0	0	0	0	0	0	0	0	0	0	0	0	0	0	0	0	0	0	0	0	0	0	0	0	0	0	0	0	0	0	0	0	0	0	0	0	0	0	0	0	0	0	0	0	0
LOC105222974	0	0	0	0	0	0	0	0	0	0	0.07	0	0.04	0	0	0.09	0	0	0.07	0	0	0	0	0	0.05	0.28	0	0	0	0	0	0	0	0	0	0	0	0	0	0	2	0	1	0	0	3	0	0	2
LOC105222975	12.21	11.39	12.26	11.31	13.43	10.81	9.26	12.34	10.35	9	11.2	11.23	14.58	10.05	13.27	11.14	8.81	11.09	11.08	9.3	12.57	12.4	12.7	8.04	12.76	10.52	9.79	9.16	10.74	9.48	186	226	204	104	220	258	212	268	213	188	234	234	240	173	253	249	216	212	220
LOC105222976	9.62	7.23	7.54	5.53	8.88	8.3	8.62	8.99	7.4	7.54	8.54	9.18	7.81	8.57	9.4	5.66	8.17	6.51	7.23	6.32	7.47	6.38	6.03	9.77	7.16	7.06	5.82	8.2	8.08	7.6	147	144	126	51	146	199	198	196	153	158	179	192	129	148	180	127	201	125	144
LOC105222977	38.1	27.51	29.3	28.25	25.1	16.37	17.48	17.35	13.98	18.83	25.53	26.42	25.25	30.42	32.12	13.27	13.88	17.28	14.1	12.76	31.77	23.58	22.87	30.97	25.84	10.9	11.92	10.96	11.56	16.14	1115	1049	937	499	790	751	769	724	553	756	1025	1058	799	1006	1177	570	654	635	538
LOC105222978	1138.4	1136.44	1231.01	1204.24	1194.22	960.63	794.2	801.16	810.57	830.62	1087.36	1091.25	1151.63	1105.91	1226.76	718.78	731.86	754.16	699.36	740.07	1192.05	1107.64	1097.51	1008.15	1064.41	685.75	688.53	836.09	881.78	817.9	6642	8641	7850	4241	7493	8788	6966	6666	6394	6648	8704	8714	7265	7292	8964	6155	6874	5525	5319
LOC105222979	13.38	18.82	15.2	16.07	20.05	17.53	12.37	12.66	13.75	13.36	16.37	16.34	15.78	14.7	16.42	15.85	15.4	13.95	11.92	13.05	16.02	13.03	16.27	14.05	12.84	12.25	13.46	13.1	17.38	13.33	149	273	185	108	240	306	207	201	207	204	250	249	190	185	229	259	276	195	173
LOC105222980	1.1	0.85	0.87	1.05	1.32	0.7	0.94	1.22	0.93	1.5	0.69	2.08	2.19	1.12	2.02	1.4	4.61	0.13	1.21	1.38	1.31	0.59	3.2	1.69	0.53	1.09	1.2	1.62	0.35	1.45	7	7	6	4	9	7	9	11	8	13	6	18	15	8	16	13	47	1	10
LOC105222981	20.95	26.24	21.98	24.5	20.91	30.26	35.65	26.14	22.33	33.23	15.72	18.01	11.68	21.26	19.43	26.24	28.89	39.99	30.72	28.19	19.78	20.03	27.37	20.1	16.51	18.98	25.56	25.74	33.75	43.42	68	111	78	48	73	154	174	121	98	148	70	80	41	78	79	125	151	163	130
LOC105222982	0	0	0	0	0	0	0	0	0	0	0	0	0	0	0	0	0	0	0	0	0	0	0	0	0	0	0	0	0	0	0	0	0	0	0	0	0	0	0	0	0	0	0	0	0	0	0	0	0
LOC105222983	13.37	12.43	9.4	10.91	11.59	8.36	9.63	7.87	10.15	8.65	9.66	11.69	9.39	9.51	9.91	10.78	8.04	9.6	11.62	10.23	11.2	11.51	10.22	13.05	10.46	9.84	10.79	9.06	8.08	11.64	562	681	432	277	524	551	609	472	577	499	557	673	427	452	522	665	544	507	637
LOC105222984	10.1	8.86	11.36	12.44	12.48	10.5	8.93	7.19	8.86	8.1	10.63	10.12	10.15	6.51	9.68	10.13	9.06	10	8.75	9.86	7.55	9.93	9.74	10.97	10.16	9.56	7.45	8.65	9.38	8.97	70	80	86	52	93	114	93	71	83	77	101	96	76	51	84	103	101	87	79
LOC105222985	7.57	8.01	7.46	6.11	6.86	5.52	4.28	5.58	6.14	5.06	6	6.78	6.89	5.84	7.75	6.29	5.64	6.55	6.58	6.23	5.35	7.03	5.24	8.25	6.67	6.88	5.85	4.37	5.04	5.49	195	269	210	95	190	223	166	205	214	179	212	239	192	170	250	238	234	212	221
LOC105222986	3.01	3.72	4.48	3.58	4.08	0.4	0.16	0.55	0.13	0.71	3.01	3.4	4.23	4.58	5.3	0.34	0.4	0.31	0.48	0.32	3.8	4.5	4.14	6.47	5.24	0.2	0.34	0.3	0.12	0.45	149	240	242	107	217	31	12	39	9	48	204	230	226	256	328	25	32	19	31
LOC105222987	12.35	9.29	11.58	9.28	11.6	10.56	11.33	9.09	9.63	11.31	11.89	11.96	15.48	10.88	11.22	9.33	9.79	8.97	10.55	9.11	9.48	17.12	13.9	12.35	12.98	11.34	6.96	9.83	10	8.51	203	199	208	92	205	272	280	213	214	255	268	269	275	202	231	225	259	185	226
LOC105222988	29.99	29.89	31.5	28.65	31.2	31.45	33.26	33.45	34.86	30.76	32.32	26.16	25.94	29.52	28.2	34.85	35.05	34.22	32.28	36.62	33.89	30.23	29.78	27.83	26.19	28.29	32.49	41.65	38.37	35.72	784	1018	900	452	877	1289	1307	1247	1232	1103	1159	936	733	872	923	1337	1475	1123	1100
LOC105222989	0.82	0.72	0.91	1.25	1.08	0.6	0.35	0.43	0.75	0.71	0.98	1.12	0.84	0.75	0.88	0.77	0.77	0.69	0.79	0.78	1.06	1.66	0.98	1.18	1.25	0.47	0.65	0.49	0.31	0.82	71	81	86	65	100	81	45	53	87	84	116	132	78	73	95	97	107	75	89
LOC105222990	1444.63	1399.68	1314.38	1351.35	1325.75	1461.31	1810.31	1774.97	1686.84	1615.69	1333.06	1250.24	1243.27	1448.17	1263.41	1570.27	1680.99	1669.66	1679.03	1646.8	1518.61	1240.08	1333.07	1398.71	1275.19	1530.73	1664.76	1706.31	1624.84	1829.26	28757	36312	28536	16279	28239	45550	54328	50310	45467	44086	36259	33886	26685	32432	31400	46044	54063	41893	43656
LOC105222992	16.47	18.8	16.17	23.05	22.21	18.27	13.18	12.39	14.73	11.38	26.91	34.21	26.63	16.43	28.02	12.42	9.3	9.32	11.37	14.64	23.29	20.91	18.98	20.55	23.94	13.36	16.74	10.7	13.15	8.45	902	1342	968	762	1308	1569	1085	968	1091	855	2022	2564	1577	1017	1922	998	820	641	812
LOC105222993	16.83	14.16	13.6	15.77	14.36	14.67	13.81	17.01	18.41	18.11	12.53	15.63	14.44	15.41	13.13	17.19	19.84	17.97	20.16	19.99	13.28	16.55	14.43	17.25	17.21	18.9	19.54	14.69	14.34	17.79	1508	1653	1332	853	1384	2061	1860	2173	2230	2226	1540	1917	1399	1560	1473	2260	2861	2022	2354
LOC105222994	0	0	0	0	0	0	0	0	0	0	0	0	0	0	0	0	0	0	0	0	0	0	0	0	0	0	0	0	0	0	0	0	0	0	0	0	0	0	0	0	0	0	0	0	0	0	0	0	0
LOC105222995	18.78	20.97	19.18	20.97	20.79	22.99	22.06	24.8	23.72	23.67	19.85	19.97	19.65	22.48	18.19	22.92	22.72	23.85	21.52	24.88	20.69	19.4	19.51	20.73	22.39	23.57	19.61	23.7	26.28	21.22	262	380	291	176	312	499	460	487	448	446	380	379	293	353	314	462	507	415	390
LOC105222996	3.76	4.44	3.05	2.64	4.5	1.92	2.44	2.24	3.06	2.21	3.06	2.76	4.21	4.16	3.04	1.89	1.94	2.74	2.9	2.07	4.53	4.08	4.07	4.94	4.52	2.12	2.13	2.74	2.02	2.61	101	159	92	44	134	78	101	88	109	83	115	106	127	129	106	76	82	96	101
LOC105222998	139.9	116.11	123.07	126.92	115.45	115.31	121.85	139.93	144.71	135.49	115.92	108.28	122.52	121.2	133.22	142.51	140.33	155.53	151.73	143.94	120.37	121.2	127.82	151.68	98.15	127.03	137.15	133.64	125.84	154.04	7741	8373	7443	4239	6870	10004	10136	11042	10826	10284	8800	8200	7330	7579	9232	11573	12500	10806	10944
LOC105222999	0	0	0	0	0	0.03	0	0	0	0	0	0	0	0	0	0.06	0	0	0	0	0	0	0	0	0.05	0	0	0	0	0	0	0	0	0	0	1	0	0	0	0	0	0	0	0	0	2	0	0	0
LOC105223000	0	0	0	0	0	0	0	0	0	0	0	0	0	0	0	0	0	0	0	0	0	0	0	0	0	0	0	0	0	0	0	0	0	0	0	0	0	0	0	0	0	0	0	0	0	0	0	0	0
LOC105223001	0.1	0	0	0	0	0.06	0	0	0.04	0	0.11	0	0.18	0	0.24	0.13	0.03	0	0	0	0.06	0	0	0.13	0.06	0.08	0	0	0	0.09	2	0	0	0	0	2	0	0	1	0	3	0	4	0	6	4	1	0	0
LOC105223003	0.22	1.28	0.1	0.18	0.21	0.28	0.67	0.7	0.41	0.49	1.22	1.71	0.62	0.59	1.24	0.15	0.83	0.44	0.34	0.97	0.66	0.97	0.63	1.29	0.12	0.86	0.66	0.35	0.49	0.45	2	15	1	1	2	4	9	9	5	6	15	21	6	6	14	2	12	5	4
LOC105223004	0.31	0.09	0.34	0.2	0	0.51	0	0.22	0	0.09	0.4	0.22	0.06	0	0.39	0	0.08	0	0.09	0.36	0	0.08	0	0.11	0.34	0.66	0.31	0.19	0.4	0	5	2	6	2	0	13	0	5	0	2	9	5	1	0	8	0	2	0	2
LOC105223005	15.23	15.47	12.48	11.3	15.64	15.66	9.12	13.92	14.29	15.69	16.96	16.33	14.93	13.07	12.71	14.56	16.19	9.29	14.07	21.74	11.89	17.9	12.78	16.32	12.19	16.17	14.88	10.15	9.91	14.04	201	266	180	90	222	324	181	262	255	284	307	295	213	195	210	282	344	154	242
LOC105223006	90.69	108.34	126.47	99.83	116.91	94.79	95.04	100.57	102.04	110.75	95.18	101.07	105.81	88.87	104.81	90.73	108	115.58	102.89	94.02	93.22	101.97	122.83	96.91	114.35	85.16	98.42	98.23	81.92	108.22	2487	3869	3790	1651	3449	4078	3918	3936	3785	4167	3583	3793	3136	2753	3600	3652	4770	3981	3679
LOC105223007	0.15	0.33	0.37	0.18	0.34	0.27	0.4	0.28	0.2	0.17	3.43	0.17	3.38	0.28	0.48	4.1	0.2	0.25	1.32	0.17	0.15	0.24	0.19	0.17	2.42	5.79	0.14	0.13	0.09	0.15	7	20	19	5	17	20	28	19	13	11	221	11	172	15	28	283	15	15	81
LOC105223008	17.09	15.03	14.81	11.9	14.37	14.55	13.91	12.18	13.25	12.92	13.95	13.35	16.23	14.08	13.68	15.08	11.77	14.99	14.12	11.89	16.64	13.41	15.75	11.62	13.96	12.22	12.85	13.9	12.98	12.84	376	431	356	158	340	502	460	382	394	390	421	402	386	350	377	487	417	414	405
LOC105223009	0.61	0.47	0.61	0.5	0.74	0.27	0.93	0.38	1.03	0.71	31.38	0.22	37.07	0.75	0.44	32.36	0.57	0.58	11.43	0.62	0.14	0	0.14	0.11	26.21	46.75	0.36	0.96	0.31	0.84	10	10	11	5	13	7	23	9	23	16	708	5	659	14	9	781	15	12	245
LOC105223010	44.64	49.6	42.05	43.58	45.07	69.99	65.52	78.59	78.63	78.84	39.11	45.78	37.8	47.09	38.42	78.37	89.41	82.4	84.79	88.93	42.48	39.7	39.17	38.69	36.27	68.9	90.35	76.59	68.95	89.36	3397	4891	3483	2011	3699	8414	7436	8592	8053	8266	4079	4768	3124	4066	3637	8745	10966	7906	8463
LOC105223011	12.98	17.76	16.52	14.47	14.81	23.08	26.53	20.08	21.47	23.32	13.54	14.35	13.5	14.25	11.48	21.59	18.73	23	22.37	23.9	14.64	13.73	16.74	11.15	13.13	22.36	20.65	21.23	24.02	19.92	397.97	709.74	553.96	267.92	488.75	1110.3	1224.11	878.63	890.54	981.87	569.95	602.79	447.87	493.95	440.87	972.02	925.41	886.06	894.71
LOC105223012	0.16	0.25	0	0	0.07	0.1	0.16	0.06	0.12	0.06	0.35	0	0.07	0	0.32	0.05	0.2	0.19	0.18	0.24	0	0.3	0	0.07	0	0.12	0.2	0.13	0.12	0.05	2	4	0	0	1	2	3	1	2	1	6	0	1	0	5	1	4	3	3
LOC105223013	15.24	21.14	12.24	20.05	18.97	23.36	21.43	21.82	17.94	21.38	21.85	29.32	23.99	17.32	23.12	15.62	11.53	13.67	14.51	18.88	18.11	21.99	25.02	17.02	20.24	22.79	26.35	14.66	23.32	13.69	543	983	476	433	725	1311	1154	1113	869	1050	1070	1434	924	696	1031	818	665	615	676
LOC105223014	0.24	0.37	0.19	0.12	0.32	0.55	0.42	0.6	0.73	0.34	0.29	0.49	0.38	0.12	0.3	0.73	0.3	0.67	0.55	0.62	0.2	0.34	0.65	0.3	0.12	1.03	0.81	0.74	0.37	0.32	7.03	14.26	6.04	2.08	10.25	25.7	18.89	25.37	29.46	14.13	12.05	20.21	12.13	4.05	11.13	31.98	14.59	24.94	21.29
LOC105223015	0.18	0.03	0.12	0.18	0.04	0.14	0.01	0.15	0.07	0.14	0.05	0.1	0.12	0.04	0.07	0.06	0.05	0.07	0.03	0.13	0	0	0.07	0.06	0.12	0.27	0.09	0.09	0.06	0.05	8	2	6	5	2	10	1	10	4	9	3	6	6	2	4	4	4	4	2
LOC105223016	0.54	1.31	1.33	1.99	1.24	0.5	0.77	0.82	0.71	1.03	3.18	1.46	1.42	1.14	1.66	0.88	1.21	0.53	0.89	0.69	1.43	1.35	1.59	1.04	1.44	2.01	0.63	0.36	0.3	0.55	13	41	35	29	32	19	28	28	23	34	105	48	37	31	50	31	47	16	28
LOC105223017	2.67	0.8	1.22	0.49	1.93	1.7	1.58	1.35	2.09	1.19	1.84	0.87	0.69	2.23	0.71	1.72	1.48	0.83	1.37	0.86	3	1.86	2.17	1.33	2.65	1.14	0.75	1.64	1.19	1.02	18	7	9	2	14	18	16	13	19	11	17	8	5	17	6	17	16	7	12
LOC105223018	5.91	6.03	5.49	5.49	5.56	8.68	9.53	7.64	7.36	6.36	5.56	5.38	6.26	4.74	6.79	6.23	6.72	7.04	7.15	8.2	5.23	4.91	5.03	5.23	6.4	7.5	7.11	6.37	7.04	6.14	239	318	243	134	242	551	580	441	403	353	309	298	274	217	344	370	438	358	377
LOC105223019	15.72	18.33	17.02	18.3	19.04	16.92	18.32	16.26	15.62	14.3	14.65	16.62	16.42	15.6	18.06	15.19	15.24	15.56	14.43	13.45	16.9	17.82	18.64	13.76	14.24	13.61	15.96	16.04	17.35	13.62	387	588	458	272	504	653	678	571	520	483	495	560	437	434	557	549	604	481	463
LOC105223020	36.77	37.77	35.1	30.6	32.66	33.96	37.8	37.65	39.3	36.59	32.59	33.71	30.99	34.7	32.34	37.59	40.87	36.43	39.75	37.26	35.86	31.73	34.41	33.9	33.06	36.58	39.19	36.61	35.51	39.21	2624	3512	2737	1318	2506	3799	4055	3831	3791	3581	3190	3292	2391	2798	2890	3936	4694	3264	3697
LOC105223021	0.27	0.41	0.35	0.54	0.13	0.38	0.36	0.51	0.7	0.31	0.31	0.26	0.42	0.35	0.22	0.28	0.37	0.41	0.33	0.36	0.32	0.3	0.27	0.48	0.15	0.37	0.41	0.35	0.38	0.22	10	20	14	12	5	22	21	27	35	16	16	13	17	15	10	15	23	20	16
LOC105223022	9.11	8.46	7.06	8.11	6.34	8.48	7.69	7.5	7.49	6.97	8.49	7.01	6.62	6.83	7.91	7.46	6.64	7.35	6.14	6.18	7.25	8.18	6.97	6.76	6.94	6.73	6.02	7.92	6.49	5.56	242	293	205	130	181	353	307	284	269	254	310	255	190	205	263	291	284	245	213
LOC105223023	0	0	0	0	0	0	0	0	0	0.22	2.22	0	1.55	0	0	1.14	0	0.12	0.47	0	0	0	0.17	0	1.53	2.11	0	0.24	0	0	0	0	0	0	0	0	0	0	0	2	20	0	11	0	0	11	0	1	4
LOC105223024	23.07	24.7	23.11	22.68	23.6	24.02	22.54	23.62	21.75	24.92	21.17	23.63	21.53	23.41	22.15	21.52	20.67	23.29	22.55	22.49	24.08	23.03	22.29	21.3	20.04	19.5	22.18	21.13	22.53	21.5	966	1351	1059	577	1067	1574	1414	1411	1228	1430	1224	1361	990	1112	1162	1329	1392	1221	1226
LOC105223025	0.37	0.52	1.14	0.21	0.64	0.99	1.03	0.74	0.78	1	0.45	0.73	0.63	0.33	0.5	0.64	1.58	1.34	0.91	1.08	1.11	0.31	0.49	0.72	0.28	1.01	1.37	1.18	0.5	0.64	6	11	20	2	11	25	25	17	17	22	10	16	11	6	10	15	41	27	19
LOC105223026	6.19	7.29	6.12	6.32	6.76	3.67	4.4	3.88	4.42	3.62	5.45	5.2	6.32	4.14	6.09	4.31	4.6	4.41	4.8	3.76	4.53	8.45	5.26	5.47	5.46	4.16	4.14	4.88	4.41	4.72	86	132	93	53	101	80	92	77	83	69	104	99	95	65	106	88	103	77	87
LOC105223027	19.6	29.71	35.22	37.89	37.31	33.21	25.37	27.06	21.6	30.81	57.9	38.49	41.17	49.96	56.33	27.69	28.98	42.77	31.53	24.17	34.35	26.29	49.03	40.42	49.03	19.27	27.92	29.3	23.64	40.06	192	379	377	224	393	510	373	378	286	414	778	516	436	553	691	398	457	526	402
LOC105223028	0	0	0	0	0	0	0	0	0	0	0	0	0	0	0	0	0	0	0	0	0	0	0	0	0	0	0	0	0	0	0	0	0	0	0	0	0	0	0	0	0	0	0	0	0	0	0	0	0
LOC105223029	0.1	0.16	0.19	0.28	0.09	0.19	0.18	0.17	0.15	0.15	0.2	0.05	0.06	0	0.03	0.07	0.06	0.05	0.03	0.12	0.12	0.04	0.15	0.21	0.19	0.21	0.06	0.03	0.07	0.08	3	6	6	5	3	9	8	7	6	6	8	2	2	0	1	3	3	2	1
LOC105223030	16.68	17.87	19.6	14.45	16.18	13.29	14.96	14.5	15.73	15.79	18.66	18.28	18.99	17.65	17.9	16	15.98	13.75	16.24	14.27	17.02	16.68	19.77	18.67	17.85	14.84	16.49	13.67	13.09	15.18	932	1339	1251	511	971	1085	1089	1088	1082	1116	1454	1492	1150	1189	1305	1160	1295	894	1075
LOC105223031	68.86	64.35	54.65	55.52	51.77	48.01	65.23	69.26	56.82	54.9	47.28	44.49	43.35	54.78	44.2	45.58	45.6	48.21	46.39	38.79	62.48	45.25	48.49	57.23	52.34	43.89	52.68	48.74	42.35	50.04	2975	3621	2588	1446	2420	3250	4266	4249	3334	3252	2820	2621	2035	2694	2394	2899	3184	2623	2629
LOC105223032	0	0	0.25	0	0.13	0	0	0.1	0	0	0.1	0	0	0.25	0	0	0	0	0	0	0	0	0	0	0	0.21	0	0	0	0	0	0	2	0	1	0	0	1	0	0	1	0	0	2	0	0	0	0	0
LOC105223033	17.04	17.21	17.84	15.07	17.75	19.02	18.82	18.07	16.4	17.65	17.08	17.07	15.76	14.59	16.16	14.7	15.73	17.77	15.75	15.37	16.51	13.18	17.46	15.27	13.56	14.85	15.59	15.98	16.06	13.61	459	604	525	245	514	803	762	694	597	652	631	629	459	444	545	581	682	601	553
LOC105223034	11.49	14.57	15.83	18.1	15.44	18.13	13.95	15.58	16.31	17.93	18.33	15.01	19.14	16.29	15.83	18.68	16.32	20.24	17.56	18.4	18.1	15.3	20.02	15.6	17.47	17.8	17.66	18.21	15.13	16.78	125	207	187	119	181	310	229	242	241	268	275	225	225	200	215	299	286	277	249
LOC105223035	51.87	45.72	46.27	50.77	49.12	46.97	49.47	47.63	48.8	45.47	46.48	50.02	46.97	49.73	44.87	47.47	45.21	48.88	51.44	54.8	41.36	48.8	45.98	50.07	44.99	46.73	53.11	46.68	51.12	45.29	1151	1322	1122	680	1172	1634	1650	1507	1464	1384	1415	1519	1127	1247	1247	1546	1615	1362	1488
LOC105223036	23.31	27.09	22.35	23.21	30.79	23.62	23.43	18.6	23.33	20.27	26.22	51.39	28.88	24.22	35.34	21.07	14.27	15.37	17.08	20.19	27.99	27.99	30.41	20.96	34.89	18.84	25.83	12.33	20.24	11.58	390	594	411	235	555	618	591	444	529	465	603	1179	524	458	742	518	385	323	372
LOC105223037	0.32	0	0.07	0	0.07	0.2	0.16	0.11	0.06	0.12	0.06	0.12	0.44	0	0.19	0	0.1	0.31	0.18	0.17	0.38	0.39	0	0.07	0.35	0.18	0.07	0.06	0.06	0.09	4	0	1	0	1	4	3	2	1	2	1	2	6	0	3	0	2	5	3
LOC105223038	62.01	59.69	65.25	66.48	63.35	64.41	65.41	64.43	65.15	62.39	61.36	63.6	61.66	58.12	64.15	59.85	59.07	62.32	61.01	63.29	56.02	59.97	59.18	60.1	60.54	60.27	63.22	68.54	64.7	62.81	1613	2023	1854	1042	1771	2626	2556	2389	2287	2224	2190	2263	1733	1708	2089	2282	2470	2034	2067
LOC105223039	0.22	0.21	0.3	0.27	0.25	0.28	0.18	0.15	0.44	0.12	0.16	0.32	0.2	0.43	0.26	0.15	0.4	0.52	0.54	0.87	0.26	0.47	0.43	0.44	0.12	0.79	0.37	0.38	0.28	0.47	4	5	6	3	5	8	5	4	11	3	4	8	4	9	6	4	12	12	13
LOC105223040	0	0.19	0	0	0	0.08	0	0	0	0	0	0	0	0	0	0	0	0	0	0	0	0	0	0.11	0	0.19	0	0	0	0	0	2	0	0	0	1	0	0	0	0	0	0	0	0	0	0	0	0	0
LOC105223041	0.02	0.03	0.06	0	0.06	0.05	0.12	0.01	0.03	0	0.02	0.09	0	0.02	0.03	0.01	0.08	0	0.02	0.06	0	0	0.02	0.06	0	0.05	0.02	0.06	0.02	0.04	1	2	3	0	3	4	9	1	2	0	1	6	0	1	2	1	6	0	1
LOC105223043	5.39	2.39	1.71	2.75	1.54	3.44	1.66	2.47	1.53	1.82	1.21	3.79	2.11	3.49	2.49	0.99	3.61	2.15	3.82	1.96	1.97	2.59	2.57	2.23	2.55	1.44	3.69	2.13	2.42	2.86	26	15	9	8	8	26	12	17	10	12	8	25	11	19	15	7	28	13	24
LOC105223045	0	0	0	0	0.03	0.02	0	0	0.08	0	0	0	0	0	0	0	0.04	0.03	0	0	0	0	0	0	0	0	0.03	0	0.03	0.02	0	0	0	0	1	1	0	0	3	0	0	0	0	0	0	0	2	1	0
LOC105223046	22.48	21.1	18.12	21.38	21.9	15.71	17.7	16.76	17.43	17.09	21.41	22.76	22.12	20.1	21.22	16.55	16.01	15.4	18.15	17.27	24.31	19.19	21.56	21.94	18.94	15.81	16.31	16.32	13.52	16.49	928	1136	818	532	972	1016	1099	986	973	968	1212	1287	986	938	1098	1004	1064	798	976
LOC105223047	0.76	1.13	0.77	0.78	1.17	1.39	1.89	1.42	1.65	1.48	0.67	0.92	0.97	0.88	0.4	1.11	1.71	2.18	2.04	2.14	0.56	1.08	0.56	0.75	0.7	1.92	1.47	1.45	1.06	2.13	29	56	32	18	48	83	108	77	85	77	35	48	40	38	19	62	105	104	101
LOC105223048	711.19	691.49	751.08	774.34	724.15	807.47	740.31	772.31	730.05	748.05	694.51	657.9	636.8	741.58	712.17	727.89	709.62	725.16	676.59	690.59	765.05	685.78	676.71	655.27	625.13	652.37	695.85	878.25	875.46	766.31	4927	6243	5687	3238	5395	8771	7710	7630	6838	7109	6601	6238	4770	5806	6179	7401	7914	6308	6110
LOC105223049	2.4	2.31	2.82	2.08	3.11	1.72	2.1	2.11	1.77	1.86	2.49	2.89	3.06	2.05	1.97	2.38	1.98	2.3	2.65	3.07	2.62	3.38	2.78	3.4	3.74	5.51	2.13	2.01	2	2.34	63	79	81	33	88	71	83	79	63	67	90	104	87	61	65	92	84	76	91
LOC105223050	0.12	0.17	0.19	0.17	0.22	0.23	0.1	0.16	0.13	0.15	0.42	0.11	0.08	0.23	0.3	0.27	0.11	0.25	0.18	0.29	0.2	0.11	0.58	0.18	0.23	0.22	0.29	0.23	0.11	0.6	7	13	12	6	14	21	9	13	10	12	34	9	5	15	22	23	10	18	14
LOC105223051	16.29	13.04	11.27	14.54	12.7	12.47	13.53	18.98	14.41	15.4	21.14	10.87	16.49	12.43	13.07	14.91	11.68	12.22	13.07	9.92	15.67	10.87	13.19	13.58	14.46	15.22	14.53	10.3	11.44	10.69	414	432	313	223	347	497	517	688	495	537	737	378	453	357	416	556	478	390	433
LOC105223052	65.47	67.73	62.99	71.29	67.93	50.8	60.31	67.93	60.6	49.29	59.37	50.5	62.34	69.57	58	40.62	37.81	41.07	40.99	44.1	72.11	60.68	71.63	66.95	61.74	38.66	45.81	46.73	45.26	43.57	951	1282	1000	625	1061	1157	1317	1407	1190	982	1183	1004	979	1142	1055	866	884	749	776
LOC105223053	20.66	20.84	19.77	16.63	19.33	16.16	14.4	17.88	15.48	16.5	16.57	19.17	16.54	17.44	16.44	16.11	18.66	18.21	18.62	18.74	19.31	19.56	17.91	17.21	18.38	17.61	18.86	14.36	14.16	17.26	1419	1859	1476	686	1425	1717	1473	1729	1426	1543	1560	1784	1227	1345	1409	1610	2044	1561	1661
LOC105223054	0.26	0.33	0.23	0.28	0.08	0.05	0	0.12	0.06	0.31	37.34	0.06	34.27	0.3	0.14	31.88	0	0.14	10.41	0	0	0.21	0.19	0.23	30.51	51.23	0	0.07	0.12	0.15	3	5	3	2	1	1	0	2	1	5	600	1	434	4	2	548	0	2	159
LOC105223055	9.82	8.17	8.91	8.27	10.76	9.61	10.74	6.89	8.8	7.71	7.95	9.3	8.54	10.46	10.37	10.26	9.36	10.61	7.73	9.13	9.1	10.3	9.08	10.19	9.11	7.76	8.46	10.63	8.51	7.23	118	128	117	60	139	181	194	118	143	127	131	153	111	142	156	181	181	160	121
LOC105223056	63.49	54.72	55.07	59.36	59.29	49.73	49.72	49.28	48.43	52.64	56.63	53.96	62.34	61.58	61.6	45.5	42.64	54.06	48.86	43.47	58.51	61.1	60.06	61.29	60.17	48.32	44.63	45.88	45.17	41.03	925	1039	877	522	929	1136	1089	1024	954	1052	1132	1076	982	1014	1124	973	1000	989	928
LOC105223057	41.83	39.72	37.94	42.65	38.64	39.4	31.37	38.04	33.86	31.23	36.59	38.96	38.09	36.28	38.61	32.32	30.38	33.02	30.75	37.13	41.86	34.02	34.85	33.77	35.42	35.69	33.16	36.75	40.62	33.06	455	563	451	280	452	672	513	590	498	466	546	580	448	446	526	516	532	451	436
LOC105223058	0.98	0.89	1.35	1.12	1.82	1.53	1.14	0.6	0.77	1.47	1.56	1.34	1.59	1.46	0.93	1.21	0.8	1.42	1.08	1.47	0.73	0.23	2	1.21	1.64	1.56	1.71	0.92	1.12	1.02	16	19	24	11	32	39	28	14	17	33	35	30	28	27	19	29	21	29	23
LOC105223059	48.73	48.05	48.64	50.15	48.75	55.57	50	52.5	47.19	46.08	51.88	47.8	48.08	47.96	52.35	52.62	48.16	38.46	44.3	46.76	45.82	47.27	42.85	43.95	48.65	44.93	49.01	58.67	56.73	50.97	330	424	360	205	355	590	509	507	432	428	482	443	352	367	444	523	525	327	391
LOC105223060	0.95	1.46	2.61	6.11	1.88	2.58	4.43	3.83	2.64	2.25	2.95	2	12.86	3.37	1.14	2.75	3.69	3.12	3.28	3.37	0.85	4.9	2.01	1.81	2.26	3.75	3.02	4.5	5.38	6.22	8	16	24	31	17	34	56	46	30	26	34	23	117	32	12	34	50	33	36
LOC105223061	26.63	19.63	24.14	20.8	29.45	18.1	14.52	6.95	12.72	8.63	13.93	14.08	29.73	19.81	13.92	15.2	19.97	10.64	13.92	9.47	16.45	25.39	18.71	16.94	13.4	14.54	11.03	19.16	14.43	20.56	333	320	330	157	396	355	273	124	215	148	239	241	402	280	218	279	402	167	227
LOC105223062	0	0.05	0	0.1	0	0	0	0	0	0	3.89	0	6.67	0	0	5	0	0.05	1.59	0	0	0	0	0	5.32	7.26	0	0	0	0.14	0	1	0	1	0	0	0	0	0	0	85	0	115	0	0	117	0	1	33
LOC105223063	126.79	131.87	161.71	186.2	192.81	164.14	207.26	145.48	176.95	189.01	132.43	114.95	194.85	137.19	174.79	149.28	185.06	211.31	185.1	191.14	137.15	159.06	211.25	173.22	189.72	142.72	167.9	192.21	168.64	186.5	2051	2780	2859	1818	3354	4163	5040	3356	3870	4194	2939	2545	3408	2508	3541	3544	4819	4292	3903
LOC105223064	0	0.08	0.48	0	0	0	0.28	0	0	0	0	0	0	0.19	0.17	0	0	0	0	0	0	0	0	0	0.12	0	0	0	0	0	0	1	5	0	0	0	4	0	0	0	0	0	0	2	2	0	0	0	0
LOC105223065	2.83	2.63	5.02	3.72	4.28	3.5	2.55	2.77	2.75	3.23	3.48	4.61	3.33	2.45	4.05	2.41	3.48	2.87	2.35	2.83	3.86	3.91	3.32	3.22	3.56	2.36	2.45	3.77	1.94	1.9	48	58	93	38	78	93	65	67	63	75	81	107	61	47	86	60	95	61	52
LOC105223066	202.7	252.23	187.78	137.43	171.74	167.6	227.47	182.75	220.16	168.47	205.34	241.16	203.03	199.27	215.97	221.25	186.56	202.02	212.62	207.5	224.91	206.27	197.78	233.98	200.57	207.4	243.38	190.13	184.02	265.49	7860	12753	7961	3216	7165	10195	13265	10108	11552	8965	10928	12798	8508	8738	10490	12598	11652	9846	10752
LOC105223067	0	0	0	0.12	0	0.02	0	0	0	0	0	0.35	0.07	0	0.51	0	0.71	0.03	0.26	0.03	0.22	0	0.08	0	0	0	0	0	0	0	0	0	0	2	0	0.85	0	0	0	0	0	13.09	2	0	17.34	0	31.02	1	9.03
LOC105223068	0.3	0.39	0.46	0.76	0.41	0.54	0.61	0.4	0.46	0.36	0.47	0.78	0.52	0.4	0.78	0.35	0.32	0.33	0.4	0.5	0.55	0.64	0.56	0.52	0.53	0.47	0.54	0.2	0.38	0.46	15	26	24	22	23	43	45	29	33	27	32	54	30	23	49	26	27	20	28
LOC105223069	0	0	0	0	0	0	0	0	0	0	0	0	0	0	0	0	0	0	0	0	0	0	0.14	0	0	0	0	0	0	0	0	0	0	0	0	0	0	0	0	0	0	0	0	0	0	0	0	0	0
LOC105223070	0.28	0.25	0	0.23	0.3	0.12	0.03	0	0.17	0	0.17	0.1	0.04	0	0	0.19	0.06	0	0.11	0.23	0.11	1.21	0	0.08	0	0.04	0	0.33	0	0	6	7	0	3	7	4	1	0	5	0	5	3	1	0	0	6	2	0	3
LOC105223071	87.28	104.47	91.86	79.87	82.74	78.93	81.23	97.9	75.85	95.4	85.96	91.71	102.07	111.93	99.75	90.37	82.38	81.41	82.12	87.28	107.34	101.14	99.86	106.36	97.04	69.1	71.35	92.11	97.29	94.04	1337.9	2086.92	1538.91	739	1363.95	1896.92	1871.77	2139.91	1571.97	2006	1807.77	1923.97	1691.71	1939	1914.94	2033	2032.89	1566.86	1640.91
LOC105223072	4.79	4.95	4.33	4.8	4.75	4.9	4.31	4.31	5.1	4.06	4.74	4.41	5.21	4.3	5.08	4.02	5.24	3.98	4.41	4.77	5	4.38	5.32	4.36	4.61	3.76	4.46	4.09	3.86	4.95	373	496	368	225	397	592	504	478	536	433	505	464	425	373	495	456	654	386	443
LOC105223073	2.61	2.85	3.19	3.57	4	2.6	3.3	2.58	2.35	2.73	2.72	3.41	2.62	2.81	3.14	3.24	2.81	2.57	1.74	2.22	3.43	2.27	3.22	3.21	2.94	3.34	2.66	2.48	2.34	2.02	92	131	123	76	152	144	175	130	112	132	132	165	100	112	139	168	160	114	80
LOC105223074	27.59	26.83	27.85	22.96	25.2	24.33	25.09	25.32	26.99	24.86	31.84	24.7	29.59	24.21	27.28	29.2	26.43	27.25	26.44	25.2	26.76	28	25.91	25.11	27.68	31.37	25.7	24.13	21.38	22.87	1308	1658	1443	657	1285	1809	1788	1712	1730	1617	2071	1603	1517	1297	1620	2032	2017	1622	1634
LOC105223075	10.89	8.68	9.08	5.98	11.35	9.87	9.78	11.38	7.95	8.6	11.02	10.49	11.42	9.21	10.3	7.75	8.62	10.66	7.88	9.27	8.66	9.89	12.56	8.37	11.47	7.8	8.4	8.64	10.95	6.47	157	163	143	52	176	223	212	234	155	170	218	207	178	150	186	164	200	193	148
LOC105223076	43.29	44.23	43.71	43.03	44.94	49.48	40.24	43.57	37.53	43.62	64.86	46.28	75.4	50.71	52.41	67.57	42.89	40.84	42.62	35.34	50.68	39.59	39.94	46.52	70.98	72.26	41.56	45.44	41.14	39.53	395	526	436	237	441	708	552	567	463	546	812	578	744	523	599	905	630	468	507
LOC105223077	204.45	192.72	216.29	203.55	219.53	184.06	170.64	171.77	167.57	176.8	214.08	214.97	204.4	197.19	219.26	152.89	149.15	158.14	150.62	161.81	220.74	219.83	218.68	200.21	195.93	145.29	156.06	171.75	178.77	155.29	3200	3931	3700	1923	3695	4517	4015	3834	3546	3796	4597	4605	3459	3488	4298	3512	3758	3108	3073
LOC105223078	21.23	19.47	21.06	23.72	25.87	31.96	27.43	32.97	28.82	27.93	20.1	19.91	19.94	20.59	20.07	25.72	26.27	24.1	24.27	27	26.69	22.37	22.23	21.52	23.71	24.37	26.03	30.46	30.48	23.44	261	312	283	176	342	616	507	578	479	471	339	335	265	286	309	464	520	372	389
LOC105223079	22.91	20.63	21.08	17.83	21.81	17.8	20.74	20.19	20.14	21.39	22.94	20.02	22.25	19.72	19.11	23.9	21.74	21.84	24.07	23.24	18.55	22.42	19.91	23.78	25.08	28.94	18.89	16.84	16.92	21.61	941	1106	940	441	962	1140	1277	1181	1117	1202	1289	1122	987	916	985	1439	1436	1128	1287
LOC105223080	36.59	28.45	30.31	29.74	33.98	25.54	25.72	31.63	27.1	30.63	31.72	33.31	32.81	29.27	28.2	33.17	34.31	37.41	39.84	32.8	25.39	34.36	31.81	41.23	37.83	33.4	33.82	22.97	31.28	29.23	687	696	622	337	686	752	726	847	688	789	817	856	666	621	663	914	1037	882	975
LOC105223081	39.1	37.39	36.77	37.28	39.38	31.62	31.45	33.83	27.41	25.52	32.89	34.9	36.72	34.18	38.81	30.25	27.21	28.36	25.01	28.66	35.48	39.41	39.38	36.46	32.25	21.22	28.22	27.03	33.57	31.84	325	405	334	187	352	412	393	401	308	291	375	397	330	321	404	369	364	296	271
LOC105223082	0.1	0	0	0.08	0.04	0.06	0.06	0.07	0.07	0.03	0.1	0.07	0	0	0	0.13	0.18	0	0.18	0.07	0	0.06	0.27	0	0.05	0.18	0.04	0.04	0.07	0.05	2	0	0	1	1	2	2	2	2	1	3	2	0	0	0	4	6	0	5
LOC105223083	11.48	11.62	11.76	10.22	11.29	18.57	23.48	26.54	26.01	22.85	11.17	13.57	14.47	14.84	12.43	19.33	22.37	21.66	22.28	24.26	11.81	9.47	13.69	12.66	11.6	17.69	21.51	21.99	19.21	26.29	352	463	393	189	372	894	1083	1162	1078	961	468	569	481	513	478	872	1105	833	891
LOC105223084	7.58	7.81	8.51	8.4	7.56	12.65	10.67	11.26	10.72	10.6	7.61	7.35	6.95	7.19	7.88	8.93	10.06	9.61	10.13	10.64	8.72	7.29	7.55	7.09	7.15	10.08	10.41	10.7	11.54	10.6	155	209	191	104	167	407	329	330	298	299	214	206	154	166	203	269	333	247	271
LOC105223085	0.14	0.09	0.25	0.09	0.03	0.08	0.32	0.13	0.05	0.08	14.67	0.02	10.44	0.11	0.07	12.43	0.3	0.26	3.65	0.11	0.07	0.03	0.15	0.17	12.95	18.91	0.33	0.08	0.11	0.13	6	4.94	11.18	2.37	1.29	5.22	19.99	7.88	2.66	4.4	835.49	1.21	468.46	4.93	3.46	757	20	13.47	197.52
LOC105223086	10.11	10.59	11.36	9.44	10.69	12.5	11.79	11.36	11.19	9.51	11.59	12.07	11.76	10.16	11.49	12.96	12.12	11.3	11.46	11.02	12.31	12.44	12.15	11.16	11.81	13.03	12.59	11.84	10.35	11.13	559	779.06	692.82	316.63	646.71	1087.78	984.01	899.12	841.34	723.6	883.51	914.79	704.54	635.07	802.54	1052	1079	789.53	827.48
LOC105223087	0.71	0.54	4.32	0.2	1.32	1.21	0.63	0.99	0.87	0.34	0.26	1.12	0.33	1.25	1.32	1.29	3.67	0.19	1.45	1.2	0.7	0.74	0.66	0.74	0.26	1	1.3	0.93	0.35	1.9	6	6	40	1	12	16	8	12	10	4	3	13	3	12	14	16	50	2	16
LOC105223088	72.9	78.25	72.22	83.89	85.86	86.89	81.09	75.64	83.35	80.91	68.28	85.44	78.05	65.95	85.5	77.12	60.84	69.47	68.82	84.94	74.11	86.62	76.02	72.89	82.68	64.9	85.14	80.34	93.23	66.34	1028	1438	1113	714	1302	1921	1719	1521	1589	1565	1321	1649	1190	1051	1510	1596	1381	1230	1265
LOC105223089	3.68	4.43	3.84	5.34	2.51	3.78	4.74	3.21	3.16	2.62	3.17	3.23	3.4	3.98	4.37	4.5	2.94	3.82	3.51	1.74	2.68	3.94	3.29	3.82	4.36	4.04	2.29	5.14	3.73	3.11	49	77	56	43	36	79	95	61	57	48	58	59	49	60	73	88	63	64	61
LOC105223090	10.31	9.43	8.58	8.01	9.91	12.41	11.86	12.33	10.43	9.89	7.85	10.89	10.56	8.35	8.23	10.08	10.31	10.72	11.13	9.98	10.46	10.05	10.81	6.4	8.78	9.02	9.86	11.07	11.23	9.05	177	211	161	83	183	334	306	302	242	233	185	256	196	162	177	254	285	231	249
LOC105223091	11.36	11.7	10.88	8.08	9.98	6.91	9.55	10.79	8.89	7.76	10.77	9.12	10.67	9.71	9.13	8.71	9.5	10.63	10.24	9.77	8.82	11.66	9.96	10.95	9.61	8.49	8.04	7.1	7.23	10.53	182	245	191	78	171	174	230	246	193	171	237	200	185	176	183	205	245	214	214
LOC105223092	22.32	21.62	24.35	21.75	20.42	21.7	22.63	19.59	24.28	20.27	19.66	19.19	20.75	21.02	21.54	20.25	19.8	22.24	17.67	20.89	17.88	17.01	20.41	18.14	23.73	19.68	19	20.14	19.7	17.03	187	236	223	110	184	285	285	234	275	233	226	220	188	199	226	249	267	234	193
LOC105223093	214.83	196.84	187.98	190.31	185.27	131.32	189.58	191.45	165.64	145.87	162.24	163.16	164.45	180.5	169.34	158.8	152.85	171.66	154.17	129.39	210.28	146.92	206.23	202.99	186.25	119.74	172.89	147.15	157.93	199.54	5704	6811	5455	3050	5290	5467	7567	7249	5946	5313	5910	5929	4721	5416	5631	6188	6533	5723	5336
LOC105223094	190.61	183.82	195.45	212.66	203.99	183.23	163.52	160.58	163.97	178.14	203.65	208.59	206.23	189.48	195.32	171.53	162.67	167.05	166.32	178.61	191.6	202.57	190.45	174.74	183.81	156.03	157.38	170.44	192.52	167.15	2220	2790	2488	1495	2555	3346	2863	2667	2582	2846	3254	3325	2597	2494	2849	2932	3050	2443	2525
LOC105223095	0	0.1	0.06	0.11	0.12	0.04	0.13	0.14	0.19	0.05	0.14	0.19	0.06	0.06	0.26	0.18	0.04	0.1	0.05	0.09	0.15	0	0.07	0.17	0	0.4	0	0.05	0.23	0.04	0	2	1	1	2	1	3	3	4	1	3	4	1	1	5	4	1	2	1
LOC105223096	473.23	340.33	455.5	470.29	397.16	520.85	531.11	511.13	504.65	518.2	435.65	393.77	415.93	381	351.95	519.12	563.39	451.52	492.88	446.47	437.48	469.48	438.23	462.46	442.36	489.49	418.4	563.74	529.39	544.29	7787	7298	8192	4671	7028	13438	13138	11994	11227	11697	9835	8868	7400	7085	7253	12537	14924	9329	10572
LOC105223097	1.51	3.34	2.93	4.27	3.8	6.46	4.73	4.3	4.67	3.95	4.4	2.47	3.78	1.65	1.92	5.33	2.76	2.48	5.25	5.1	2.64	4.44	4.9	2.62	6.65	4.79	3.69	2.31	3.11	2.76	17	49	36	29	46	114	80	69	71	61	68	38	46	21	27	88	50	35	77
LOC105223098	8.54	0.37	12.77	0.97	0.99	2.2	0.22	3.01	1.61	0.2	0.58	5.12	4.66	3.71	0.04	1.81	5.01	12.98	5.71	3.51	0.63	3.91	0.06	5.93	4.62	10.02	0.13	0.25	0.55	0.55	161	9	263	11	20	65	6	81	41	5	15	132	95	79	1	50	152	307	140
LOC105223099	1.6	0.24	4.95	0.26	2.11	1.25	1.85	1.77	0.95	1.16	1.01	1.32	0.67	1.82	0.58	1.26	2.52	1.6	1.5	1.75	0.43	0.39	0.87	1.24	0.52	2.46	1.13	1.5	1.05	1.57	31	6	105	3	44	38	54	49	25	31	27	35	14	40	14	36	79	39	38
LOC105223100	0.22	0	0.05	0	0	0.28	0.18	0.04	0.12	0.04	0.16	0.12	0	0.1	0.04	0.11	0.03	0.13	0.04	0.08	0.13	0.07	0.06	0.1	0.18	0.13	0.14	0.09	0	0.06	4	0	1	0	0	8	5	1	3	1	4	3	0	2	1	3	1	3	1
LOC105223101	28.18	24.19	29.51	25.99	25.8	31.32	32.28	24.96	30.09	37.17	31.98	33.12	30.1	24.94	32.13	28.51	26.89	26.84	27.75	32.5	27.46	25.79	25.98	24.02	31.48	30.55	29.52	31.61	34.59	25.83	194	217	222	108	191	338	334	245	280	351	302	312	224	194	277	288	298	232	249
LOC105223102	25.29	19.64	26.39	20.82	21.65	15.27	15.16	14.89	13.37	16.43	23.91	22.39	25.33	17.1	21.15	16.1	17.51	13.76	14.91	15.46	23.04	24.86	20.67	26.59	24.55	15.55	9.92	15.55	14.01	12.39	505	511	576	251	465	478	455	424	361	450	655	612	547	386	529	472	563	345	388
LOC105223103	1.7	2.21	2.42	2.06	1.91	1.92	2.31	2.03	1.91	1.81	2.95	2.04	2.09	1.77	2.22	1.65	1.69	1.83	1.93	1.84	2.49	2.5	2.77	2.08	1.83	2.18	2.48	1.62	1.5	1.92	74	125	115	54	89	131	151	126	112	108	176	121	98	87	121	105	118	100	109
LOC105223104	8.69	6.43	6.85	5.87	7.53	8.02	7.47	7.4	5.43	6.75	7.55	5.94	6.95	5.85	6.81	5.94	6.68	6.97	5.72	6.62	6.76	9.18	6.9	7.32	7.38	5.83	4.91	7.16	7.99	6.57	309	298	266	126	288	447	399	375	261	329	368	289	267	235	303	310	382	311	265
LOC105223105	49.5	44.27	48.71	51.93	50.81	45.37	41.98	42.7	37.66	41.66	48.03	46.2	44.26	45.29	44.94	39.76	42.1	39.82	37.65	39.25	48.45	50.24	40.06	50.65	45.87	38.82	38.37	40.51	42.97	47.13	1085	1265	1168	688	1197	1558	1383	1333	1115	1253	1446	1382	1048	1120	1235	1275	1486	1095	1074
LOC105223106	25.11	24.33	22.16	23.16	24.06	21.8	20.68	21.32	22.79	21.98	22.77	24.69	23.61	22.53	20.78	21.18	22.37	21.76	22.59	22.17	22.85	26.45	21.53	23.93	24.21	22.63	22.52	20.36	20.24	23.17	1169	1384	1111	634	1149	1413	1205	1378	1270	1257	1465	1462	1070	1130	1177	1306	1502	1188	1320
LOC105223108	4.07	4.82	10.8	5.74	3.5	17.79	23.86	16.45	16.24	28.86	7.03	4.85	3.67	4.18	6.54	18.21	21.38	38.34	23.71	21.09	4.06	5.78	11.87	4.31	9.26	15.1	19.78	20.24	16.77	15.15	81	125	235	69	75	555	714	467	437	788	192	132	79	94	163	532	685	958	615
LOC105223109	59.18	53.57	59.48	67.13	64.92	82.73	69.13	69.71	63.17	63.75	57.9	55.16	65.25	55.07	62.5	72.5	71.53	70	55.46	67.01	58.4	57.58	63.77	60.32	56.97	63.21	68.86	78.82	73.77	64.4	406	479	446	278	479	890	713	682	586	600	545	518	484	427	537	730	790	603	496
LOC105223110	4.11	3.96	4.34	4.45	3.71	5.46	5.36	5.15	4.81	4.25	4.13	3.37	4.07	3.67	3.25	4.74	4.95	4.78	4.47	4.48	3.84	4.72	3.4	4.01	3.19	4.52	4.19	4.23	4.47	3.6	98	123	113	64	95	204	192	175	155	139	135	110	105	99	97	166	190	143	139
LOC105223111	0.49	0.48	0.44	0.57	0.69	0.77	0.48	0.6	0.6	0.65	0.92	0.73	0.5	0.38	0.75	0.84	0.64	0.39	0.59	0.46	0.29	0.68	0.39	0.64	0.93	0.57	0.75	0.54	0.44	0.94	17	22	17	12	26	42	25	30	27	31	44	35	19	15	33	43	36	17	27
LOC105223112	219.13	182.39	225.6	227.74	208.28	245.25	217.81	244.69	228.33	230.37	211.99	203.88	191.64	199.97	169.08	246.56	260.56	223.68	230.69	225.55	183.02	216.95	181.5	204.1	192.77	249.71	221.26	248.92	246.53	230.22	4094	4472	4619	2565	4201	7200	6169	6556	5777	5918	5453	5241	3887	4250	3980	6809	7855	5282	5628
LOC105223113	11.57	10.88	11.33	8.91	11.97	12.79	14.85	9.26	10.73	9.62	10.57	11.67	14.47	8.36	10.28	8.66	11.04	13.11	10.5	9.83	11.82	11	9.72	10.78	10.19	9.29	10.21	10.41	12.74	10.41	71	87	76	33	79	123	137	81	89	81	89	98	96	58	79	78	109	101	84
LOC105223114	0	0	0	0	0	0	0	0	0	0	0	0	0	0	0	0	0	0	0	0	0	0	0	0	0	0	0	0	0	0	0	0	0	0	0	0	0	0	0	0	0	0	0	0	0	0	0	0	0
LOC105223115	10.17	10.86	9.66	10.08	10.1	7.51	6.43	6.71	8.14	8.07	12.32	11.78	12.28	9.68	11.85	8.73	6.49	7.06	7.61	7.14	10.44	12.05	11.35	10.91	11.84	8.3	7.58	6.4	6.13	6.46	475	661	493	284	507	550	451	447	514	517	789	753	620	511	693	598	488	414	463
LOC105223116	7.37	6.25	7.44	5.87	6.01	6.18	6.06	6	6.17	6.07	6.54	6.77	6.61	6.82	7.01	5.32	5.45	5.95	5.69	5.46	7.56	7.38	6.94	6.97	6.92	6.26	4.31	5.76	5.14	6.66	261.88	289.61	289.16	126.07	229.89	344.32	323.87	303.97	296.43	295.85	318.85	329.52	254.01	274.06	312.06	277.62	311.78	265.76	263.77
LOC105223117	16.58	14.63	15.44	16.73	14.36	12.79	9.97	11.01	11.42	10.69	18.32	12.29	17.94	14	10.84	18.69	11.81	10.55	13.19	10.55	12.29	18.97	14.8	12.33	20.24	18.6	11.37	10.72	10.42	9.85	637	735.98	657	377	589	791	595	605	601	579	989	644	748	624	548	1051	745	501	657
LOC105223118	1.1	1.2	1.51	1.7	0.8	1.14	0.86	1.16	0.75	0.82	1.46	1.03	0.95	1.11	1.19	1.2	0.4	0.54	0.56	0.51	0.96	1.41	0.88	1.46	1.57	0.87	0.64	0.68	0.83	0.5	23.12	33.41	36.84	22.93	19.11	34.68	28.13	36.03	22.57	25.15	38.15	31.48	22.99	27.94	30.94	39.38	14.22	15.24	16.23
LOC105223119	8.72	8.26	8.22	8.92	10.66	6.9	4.91	6.71	6.16	6.28	11.7	8.46	9.72	7.95	8.31	9.62	6.38	6.09	7.25	7.4	9.12	9.73	10.12	9.44	13.2	11.17	6.2	5.14	5.4	6.15	397	491	410	244	523	493	337	436	380	392	732	528	478	410	475	644	468	349	431
LOC105223120	40.72	41.38	41.84	42.26	46.42	42.88	47.33	43.63	45.99	44.66	47.44	37.64	48.95	43.53	38.44	50.31	40.69	47.99	45.35	44	42.29	35.59	39.91	37.9	43.64	48.1	42.69	45.06	45.11	39.04	894	1184	1004	560	1096	1476	1562	1366	1365	1345	1429	1131	1162	1080	1057	1621	1438	1323	1298
LOC105223121	5.29	4.02	3.15	3.6	3.29	7.38	6.88	5.83	8.83	10.25	4.09	3.24	3.58	5.68	3.81	8.68	6.54	7.89	7.31	7.51	6	2.54	3.56	4.13	4.32	6	5.47	8	8.51	7.06	112	111	73	46	75	245	219	176	253	298	119	94	82	136	101	270	223	210	202
LOC105223122	1.13	0.61	0.4	1	1.34	1.19	1.38	0.57	0.93	1.1	0.9	1.35	0.61	0.77	1.18	0.87	0.79	0.98	1.35	0.68	0.42	0.63	1.32	0.67	1.56	1.24	0.74	0.57	0.86	1.08	18.1	11.08	9.09	8	27.05	26.08	32.23	16.09	19.03	26	27.23	23.03	17.29	13	23.06	23	25.11	24.14	27.09
LOC105223124	0	0.11	0	0.23	0	0	0	0.1	0.21	0	0.1	0	0.13	0	0.22	0	0.52	0	0.22	0.1	0	0	0.32	0.13	0	0	0	0	0.41	0	0	1	0	1	0	0	0	1	2	0	1	0	1	0	2	0	6	0	2
LOC105223125	70.08	76.2	67.06	62.51	67.22	47.27	55.99	48.99	55.11	54.22	68.37	71.71	68.1	71.8	71.06	53.19	49.7	54.6	51.53	51.31	73.63	72.33	79.7	79.3	70.71	50.01	50.85	48.14	51.03	56.26	1616	2290	1690	870	1667	1709	1941	1611	1718	1715	2163	2263	1698	1871	2052	1800	1845	1581	1549
LOC105223126	24.08	21.72	24.91	21.88	25.45	28.57	29.19	27.06	31.79	27.78	23.43	23.12	21.17	24.17	20.51	26.67	24.6	28.34	31.37	26.86	21.07	18.93	23.89	21.55	23.1	30.02	27.5	29.63	30.51	23.86	402	473	455	221	457	748	732	645	717	637	537	528	382	456	429	654	661	595	683
LOC105223127	38.8	40.18	40.31	34.04	43.99	47.3	36.93	35.65	39.09	43.75	34.97	40.22	35.35	38.81	36.32	31.91	36.63	45.59	40.1	34.15	36.13	41.1	34.18	38.69	37.89	34.75	41.51	36.76	49.97	34.64	406	548	461	215	495	776	581	532	553	628	502	576	400	459	476	490	617	599	547
LOC105223129	19.4	22.95	16.87	17.72	29.96	103.26	66.38	79.48	65.98	71.65	23.16	34.55	24.03	10.08	20.29	50.66	39.84	71.18	68.03	103.86	17.21	37.47	30.44	25.07	24.99	73.1	107.2	38.18	98.48	38.37	749	1155	712	413	1244	6251	3853	4376	3444	3795	1227	1826	1003	440	981	2871	2476	3451	3424
LOC105223130	5.15	5.39	5.18	4.84	5.59	3.33	3.73	4.32	4.08	3.62	5.57	5.68	6.52	5.1	5.05	4.88	4.54	4.38	4.58	4.52	4.19	5.81	6.19	5.89	6.15	4.68	4.26	2.93	2.33	3.95	323	440	355	183	377	327	351	386	346	311	479	487	442	361	396	449	458	345	374
LOC105223131	3.75	2.33	2.5	2.52	3.96	2.97	3.51	2.35	2.25	2.37	3.84	3.85	2.91	2.33	2.83	2.83	2.02	1.62	2.96	2.36	3.62	3.93	2.4	2.45	4.64	3.67	2.32	2.72	3.26	3.33	37	30	27	15	42	46	52	33	30	32	52	52	31	26	35	41	32	20	38
LOC105223132	20.97	18.88	15.97	15.39	15.64	18.98	17.62	16.73	19.78	19.13	16.01	17.25	18.69	19.22	16.04	18.22	15.44	15.9	16.37	16.05	15.52	15.07	17.93	13.8	16.4	14.99	16.69	17.52	21.55	19.57	167	196	139	74	134	237	211	190	213	209	175	188	161	173	160	213	198	159	170
LOC105223133	9.24	9.21	8.26	6.93	9.53	6.71	7.34	6.73	7.61	7.95	8.91	8.97	8.53	8.64	8.4	8.4	7.7	8.34	8.34	8.24	8.82	9.49	9.5	9.6	9.64	8.76	7.65	6.25	7.66	7.87	442	574	432	200	490	503	528	459	492	522	585	587	441	467	503	590	593	501	520
LOC105223134	13.89	12	14.03	14.71	14.47	10.17	11.97	11.5	11.34	10.96	12.34	9.98	12.14	11.82	14	8.79	8.68	9.43	9.26	9.04	14.35	13.48	13.66	13.57	12.54	8.36	12.15	11.85	10.09	10.13	183	206	202	117	205	210	237	216	202	198	223	180	173	176	231	170	184	156	159
LOC105223135	58.88	57.57	58.94	54.47	53.06	49.24	50.99	57.07	52.4	51.61	57.3	58.84	55.5	51.92	58.6	51.15	61.37	48.13	53.47	50.49	60.03	51.97	51.86	55.74	53.27	53.33	52.55	45.49	43.56	49.54	2554	3254	2794	1426	2475	3349	3325	3530	3073	3071	3410	3493	2603	2545	3183	3256	4285	2621	3023
LOC105223136	33.04	25.89	26.2	25.24	27	25.53	25.32	29.15	26.12	27.33	31.82	26.31	30.31	26.2	27.01	30.72	30.19	28.63	32.74	29.43	27.28	29.33	26.94	33.85	35.48	32.74	28.83	21.79	24.57	28.53	1359	1389	1183	631	1196	1644	1565	1708	1452	1549	1795	1489	1347	1217	1394	1857	2010	1485	1755
LOC105223137	23.41	22.2	22.79	23.18	22.61	22.12	20.63	21.51	19.59	20.41	23.93	22.27	21.43	24.12	24.14	21.9	19.6	21.62	17.71	19.26	21.54	27.51	21.52	22.54	18.61	18.07	18.18	22.94	22.48	18.84	494	611	526	297	513	733	656	649	559	592	694	644	491	576	639	680	666	573	487
LOC105223138	2.36	0.55	5.3	1.19	1.93	0.82	1.09	2.01	1.75	1.25	1.3	3.4	2.91	1.96	4.97	1.36	7.2	1.99	2.58	1.51	1.02	1.34	1.61	2.43	1.76	2.59	1.15	1.07	1.41	2.35	33	10	81	10	29	18	23	40	33	24	25	65	44	31	87	28	162	35	47
LOC105223139	0.04	0	0	0	0.09	0	0.03	0	0	0	0.03	0.09	0.04	0	0	0.21	0	0.03	0	0.08	0	0.11	0.1	0.08	0.05	0	0.04	0.03	0	0.1	1	0	0	0	3	0	1	0	0	0	1	3	1	0	0	7	0	1	0
LOC105223140	14.66	16.26	20.96	12.93	12.4	15.99	19.58	21.42	20.79	19.32	11.33	11.56	12.74	12.19	17.85	18.85	26.67	18.68	21.1	18.81	13.09	11.76	13.44	14.49	11.56	18.37	19.11	20.59	15.64	17.44	265	383	414	141	241	453	532	552	508	479	281	286	249	249	404	500	776	424	497
LOC105223141	27.8	26.38	24.18	20.63	24.65	20.09	23.55	22.76	20.29	20.85	27.69	24.05	28.13	25.26	24.79	21.84	19.48	19.33	19.99	17.8	23.78	22.82	28.53	21.85	23.55	21.06	19.65	17.01	17.48	19.07	969	1198	921	434	924	1098	1234	1131	956	997	1324	1147	1060	995	1082	1117	1093	846	908
LOC105223142	10.11	10.93	10.89	11.29	10.8	6.98	7.8	7.74	8.25	7.03	11.45	11.29	11.78	9.36	10.4	8.74	8.65	7.73	9.17	7.45	8.48	10.94	10.07	10.17	13.03	8.61	8	6.38	6.06	7.93	350	493	412	236	402	379	406	382	386	334	544	535	441	366	451	444	482	336	414
LOC105223143	4.61	4.03	3.46	3.92	3.84	3.86	3.6	4.89	4.59	3.29	3.94	4.02	3.55	4.82	4.55	3.14	3.46	4.18	3.59	4.35	3.46	3.72	3.56	3.78	3.4	3.28	4.39	4.39	4.07	3.9	144	164	118	74	129	189	169	218	194	141	169	172	120	170	178	144	174	164	146
LOC105223144	2.25	2.79	2.64	2.84	2.86	2.62	3.17	2.87	3.47	2.89	2.09	3.67	2.09	2.83	3.02	2.78	2.95	2.86	2.43	3.17	2.09	2.11	3.33	2.33	3.02	3.51	3.08	2.54	2.78	2.81	96	155	123	73	131	175	203	174	200	169	122	214	96	136	161	174	202	153	135
LOC105223145	0	0.23	0	0.3	0	0.15	0.04	0.21	0.04	0.09	0	0.18	0	0	0.05	0.29	0	0	0	0	0	0	0.07	0.32	0.2	0	0.05	0.09	0.09	0	0	5	0	3	0	4	1	5	1	2	0	4	0	0	1	7	0	0	0
LOC105223146	0	0	0	0.15	0	0	0	0	0	0	0	0	0	0	0.07	0	0	0	0	0	0	0	0	0	0	0.21	0	0	0	0	0	0	0	1	0	0	0	0	0	0	0	0	0	0	1	0	0	0	0
LOC105223147	3.42	4.89	4.27	5.53	3.78	7.4	8.54	7.62	9.06	9.39	2.68	3.25	2.02	3.98	2.91	8.05	8.88	8.25	8.93	9.98	2.54	2.89	2.55	2.98	3.59	8.67	8.37	9.96	8.88	10.22	80	149	109	78	95	271	300	254	286	301	86	104	51	105	85	276	334	242	272
LOC105223148	19.27	19.42	17.16	18.28	20.78	15.5	15.8	16.83	15.92	18.37	19.53	21.71	21.37	16.52	19.21	17.2	19.89	19.98	19.54	19.05	17.74	18.86	19.47	21.79	21.7	20.33	19.58	14.36	16.83	19.47	709	931	690	406	822	894	874	883	792	927	986	1093	850	687	885	929	1178	923	937
LOC105223149	12.19	12.63	10.42	10.71	13.35	11.7	11.7	10.45	11.59	12.19	13.29	11.62	12.54	10.64	11.42	12.21	8.6	10.89	9.73	10.7	10.85	10.87	12.9	9.89	11.44	12.98	11.23	11.56	10.34	9.07	319	432	306	171	374	487	460	399	417	443	482	417	358	320	376	477	364	367	337
LOC105223150	12.92	13.73	14.46	16.29	15	18.27	14.49	12.89	15.29	19.26	10.69	14.04	12.08	11.18	12.68	15.44	13.89	14.14	15.39	15.61	12.62	12.69	13.75	10.3	14.47	14.8	14.51	16.36	20.82	13.7	230	315	304	181	288	521	392	346	403	502	269	344	246	235	299	408	411	324	361
LOC105223151	0	0.05	0.03	0	0.03	0	0.02	0.02	0.12	0.02	0.05	0	0	0.03	0.08	0.07	0.02	0	0.03	0	0	0	0.04	0.03	0	0	0	0.05	0	0.04	0	2	1	0	1	0	1	1	5	1	2	0	0	1	3	3	1	0	1
LOC105223152	0.19	0.22	0.32	0.32	0.2	0.14	0.17	0.35	0.11	0.24	0.24	0.43	0.32	0.13	0.35	0.38	0.34	0.24	0.37	0.22	0.26	0.08	0.24	0.62	0.51	0.12	0.15	0.19	0.19	0.34	9.07	13.09	16.15	9.06	10.11	10.08	12.1	23.19	7.07	15.1	15.09	27.24	16.14	7.05	20.14	26.2	25.19	14.09	22.18
LOC105223153	0.05	0.1	0.14	0	0.1	0.08	0.11	0.06	0.06	0.08	0.17	0	0	0.05	0	0	0.18	0.02	0.08	0.02	0.03	0.03	0.06	0.02	0.03	0.08	0	0	0.02	0.15	2	5	6	0	4	5	6	3	3	4	9	0	0	2	0	0	11	1	4
LOC105223154	0	0	0	0	0	0	0.16	0	0.09	0	0	0.13	0	0	0	0	0	0	0	0.04	0	0	0	0	0	0.14	0	0	0.13	0.04	0	0	0	0	0	0	4	0	2	0	0	3	0	0	0	0	0	0	0
LOC105223155	2.19	2.17	1.39	2.09	1.96	1.75	2.47	1.86	2.96	1.38	2.21	2.09	1.25	2.16	1.45	2.04	2.02	0.91	1.78	1.81	3.16	1.9	1.23	1.39	2.16	1.59	2.78	1.69	1.85	2.33	52	67	36	30	50	65	88	63	95	45	72	68	32	58	43	71	77	27	55
LOC105223156	0.71	0.74	2.05	0.38	0.58	0.07	0.18	0.1	0.1	0.57	0.47	0.25	0.66	0.1	0.68	0.16	0.09	0.04	0.05	0.08	0.63	0.37	0.67	0.41	0.33	0.16	0.12	0.05	0.17	0.12	31	42	97	10	27	5	12	6	6	34	28	15	31	5	37	10	6	2	3
LOC105223157	0.08	0.03	0.04	0.06	0	0.05	0.2	0.08	0.14	0	0.08	0.03	0	0.07	0.03	0.03	0	0	0.09	0.03	0	0.05	0.04	0.03	0.09	0.12	0.03	0.03	0.14	0.02	2	1	1	1	0	2	8	3	5	0	3	1	0	2	1	1	0	0	3
LOC105223158	24.88	22.19	41.23	24.4	30.08	5.15	3.81	3.71	5.93	4.53	19.13	22.2	27.2	13.9	27.31	3.49	4.71	3.91	3.31	2.69	18.75	22.44	31.73	20.33	20.29	4.41	3.74	6.92	2.59	5.37	456	530	826	270	593	148	105	97	147	114	481	557	539	288	627	94	139	90	79
LOC105223159	0.09	0.1	0.04	0	0	0	0	0	0.07	0.06	0.1	0.03	0	0.12	0.04	0	0.14	0	0	0	0	0	0	0	0.15	0	0.08	0	0	0.05	2	3	1	0	0	0	0	0	2	2	3	1	0	3	1	0	5	0	0
LOC105223160	6.98	6.77	7.18	6.9	7.01	6.1	5.05	6.83	7.59	7.19	7.05	6.72	6.89	7.08	7.67	6.89	7.51	7.34	7.79	8.05	7.16	8.37	8.37	8.57	8.76	6.79	8.54	6.56	5.71	7.65	496	627	558	296	536	680	540	692	730	701	688	654	530	569	683	719	860	655	722
LOC105223161	0.03	0.12	0.06	0.03	0.01	0.13	0	0.01	0.01	0.07	0.06	0.09	0.06	0	0.13	0.14	0.06	0.02	0.05	0.02	0.04	0.06	0.07	0.11	0.31	0.09	0.06	0.01	0	0.02	2	10	4	1	1	13	0	1	1	6	5	8	4	0	11	13	6	2	4
LOC105223163	0.6	0.91	1.17	0.55	1.08	0.78	0.49	0.71	0.72	0.99	1.02	1.08	0.86	0.83	1.01	1.18	1.26	1.82	1.22	1.36	0.95	1.18	1.2	1.44	1.25	0.94	1.12	0.79	0.4	1.34	51	101	109	28	99	104	63	86	83	115	119	126	79	80	108	147	172	194	135
LOC105223164	0.05	0.08	0.1	0	0.15	0	0	0.04	0.04	0	0	0	0	0	0	0.04	0	0	0	0	0	0	0	0.19	0	0	0	0	0	0	1	2	2	0	3	0	0	1	1	0	0	0	0	0	0	1	0	0	0
LOC105223166	0	0	0.07	0	0.03	0	0	0	0	0	14.4	0	13.1	0	0	13.77	0.05	0.03	4.35	0.03	0	0	0.08	0	9.32	20.41	0	0	0.03	0	0	0	2	0	1	0	0	0	0	0	550	0	394	0	0	562	2	1	158
LOC105223167	0	0	0	0	0	0.28	0	0	0.25	0	0	0	0	0	0	0	0.21	0.09	0	0.32	0	0	0	0	0	0.09	0	0.18	0.33	0	0	0	0	0	0	4	0	0	3	0	0	0	0	0	0	0	3	1	0
LOC105223168	0	0	0	0	0	0	0	0	0	0	0	0	0	0.05	0	0	0	0	0	0	0	0	0	0.05	0	0.04	0	0	0.04	0.06	0	0	0	0	0	0	0	0	0	0	0	0	0	1	0	0	0	0	0
LOC105223169	13.42	12.93	12.57	11.66	15.44	20.05	15.49	16.1	16.16	18.79	13.06	16.12	14.41	13.29	13.11	19.29	19.45	23.51	26.88	27.25	12.14	18.07	15.23	17.07	15.45	27.03	25.66	14.38	17.56	18.82	824	1034	843	432	1019	1930	1429	1409	1341	1582	1100	1354	956	922	1008	1738	1922	1812	2151
LOC105223170	9.25	9.49	8.88	9.65	8.66	8.15	8.76	9.37	9.25	9.63	8.7	9.07	8.57	8.74	7.24	10.94	9.95	9.71	10.95	10.33	8.62	9.4	8.19	10.99	10	11.2	11.36	7.72	7.58	9.85	1220	1631	1280	768	1228	1685	1737	1763	1649	1742	1574	1637	1222	1303	1196	2118	2112	1608	1882
LOC105223172	3.52	3.74	3.07	3.58	2.97	4.52	2.6	3.38	3.34	2.46	3.47	5.42	3.09	2.4	3.43	2.59	2.41	3.91	3.38	3.95	2.94	3.69	3.34	3.5	3.65	3.6	3.94	1.64	3.34	2.43	191	264	182	117	173	384	212	261	245	183	258	402	181	147	233	206	210	266	239
LOC105223174	13.07	14.58	10.93	8.73	10.15	9.42	7.82	9.3	8.21	8.5	8.78	11.41	11.22	10.74	11.04	10.38	9.06	8.46	11.11	8.13	8.83	12.47	12.48	10.51	11.66	9.2	9	7.79	10.37	8.98	139	202	127	56	116	157	125	141	118	124	128	166	129	129	147	162	155	113	154
LOC105223175	4.69	5.26	4.65	5.01	5.03	5.33	5.54	5.08	5.01	4.61	5.99	5.05	4.36	5.84	5.16	4.9	4.43	5.97	4.94	4.49	5.44	4.34	5.37	4.49	5.61	4.15	4.74	4.55	4.38	4.23	169	247	183	109	195	301	300	261	244	228	296	249	170	238	233	259	257	270	232
LOC105223176	133.74	134.76	144.87	151.33	137.5	165.84	153.2	158.47	155.73	158.93	131.82	132.52	123.57	140.34	146.28	150.42	139.82	148.51	145.86	153.12	132.71	148.06	125.41	134.04	132.84	126	143.81	170.01	167.45	151.54	1022	1342	1210	698	1130	1987	1760	1727	1609	1666	1382	1386	1021	1212	1400	1687	1720	1425	1453
LOC105223177	0	0	0.13	0.12	0.07	0.09	0.29	0.05	0.05	0.1	1.31	0	0.4	0	0	0.59	0.04	0	0.28	0.05	0	0	0.08	0	0.72	1.33	0.06	0.06	0.32	0.08	0	0	2	1	1	2	6	1	1	2	25	0	6	0	0	12	1	0	5
LOC105223178	13.09	12.26	12.36	11.95	12.27	9.66	10.29	10.47	9.02	9.87	11.73	13.85	12.92	11.79	13.06	11.05	11.22	11.47	11.52	11.49	10.65	13.28	12.09	13.49	13.42	11.57	10.67	8.31	9.4	9.44	488	596	504	269	492	564.86	577	557	455	505	599.97	707	521	497	610	605	673.73	537	560
LOC105223179	30.74	22.45	29.77	29.29	30.77	27.84	26.17	26.33	27.36	28.51	27.31	24.52	29.73	28.72	28.29	25.95	22.4	26.41	22.98	23.97	27.15	31.88	27.36	25.24	29	24.4	25.1	25.9	25.54	22.95	393	374	416	226	423	558	503	480	473	500	479	429	411	415	453	487	461	424	383
LOC105223180	0.21	0	0.06	0	0.17	0.13	0.06	0.03	0	0.04	9.93	0.31	13.69	0.07	0.05	11.52	0.03	0.4	2.55	0.04	0.05	0.07	0.05	0.08	8.74	17.14	0	0.07	0.05	0.03	5	0	1.51	0	4.31	5	2	1	0	1.42	324	10	352	2	1.41	402	1	12	79
LOC105223181	0	0.08	0.15	0	0.27	0	0	0	0.32	0.2	0	0	0	0	0.22	0	0	0	0	0.12	0	0.22	0	0	0	0	0.18	0	0.04	0.53	0	1	1.49	0	2.69	0	0	0	4	2.58	0	0	0	0	2.59	0	0	0	0
LOC105223182	0.13	0.2	0.12	0	0.24	0.33	0	0.45	0	0	0	0.09	0	0	0	0	0	0.1	0	0.28	0.46	0	0	0	0.14	0	0.33	0	0	0	1	2	1	0	2	4	0	5	0	0	0	1	0	0	0	0	0	1	0
LOC105223183	5.29	4.89	5.93	4.99	5.23	4.68	5.48	3.95	4.79	4.52	5.97	5.57	5.68	6.44	5.26	5.23	4.63	5.12	5.84	6.94	3.31	4.83	4.6	6.71	5.4	4.03	4.19	4.44	4.03	4.35	93	112	114	53	99	129	145	99	114	109	144	134	108	128	116	135	131	113	134
LOC105223184	13.69	9.67	12.08	9.53	11.71	10.62	12.57	12.53	11.38	9.89	12.98	10.4	11.04	12.33	11.51	11.55	11.48	12.35	9.29	11.26	10.51	14.77	12.13	10.56	14.14	10.68	10.05	10.03	12.16	9.34	226	208	218	95	208	275	312	295	254	224	294	235	197	230	238	280	305	256	200
LOC105223185	16.09	16.87	14.85	14.45	14.73	13.95	13.63	13.96	13.69	15.13	14.37	14.65	15.97	15.95	15.31	14.79	14.33	14.63	14.76	15.29	16.03	18.54	14.57	15.39	15.28	13.24	13.82	14.63	13.82	13.53	574	784	579	311	565	780	731	710	660	740	703	715	616	643	684	774	823	655	686
LOC105223186	73.23	63.88	59.79	59.44	62.2	68.72	72	80.15	77.9	76.33	51.41	62.63	59.85	61.28	59.21	80.42	98.43	92.76	102.75	94.67	61.2	65.71	71.32	78.35	67.38	87.06	90.28	64.92	70.4	86.33	3886	4418	3468	1904	3550	5718	5744	6066	5589	5557	3743	4549	3434	3675	3935	6264	8409	6181	7108
LOC105223187	0.23	0.27	0	0	0.4	0.07	0	0	0.21	0	0.52	0.41	1.44	0.35	1.19	0	0	0	0.11	0	2.38	0.62	0.86	0.89	0.71	0.11	0	0	0	0.2	2	3	0	0	3	1	0	0	2	0	5	4	11	3	11	0	0	0	1
LOC105223188	7.56	7.77	5.25	7.4	6.37	4.63	6.07	5.95	7.22	5.16	7	7.37	7.99	6.59	7.64	6.19	6.78	7.89	7.94	7.87	5.89	8.8	8.34	10.65	9.36	6.63	5.64	4.79	5.17	5.98	203	272	154	120	184	195	245	228	262	190	258	271	232	200	257	244	293	266	278
LOC105223189	18.31	19.98	17.18	18.71	21.06	21.08	22.38	20.64	22.03	20.86	22.22	20.52	20.08	20.55	23.59	19.85	18.9	21.58	16.11	20.65	18.64	18.58	18.1	18.25	18.88	20.96	20.76	20.71	18.93	18.65	313	445	321	193	387	565	575	503	509	489	521	480	371	397	505	498	520	463	359
LOC105223190	305.16	328.64	346.61	331.93	312.57	369.32	313.48	356.45	318.92	351.87	304.51	291.15	302.23	332.68	334.37	321.58	325.39	360.58	288.99	307.71	366.27	306.02	313.06	308.83	285.25	298.49	340.79	386.8	381.33	353.11	1761	2473	2179	1151	1942	3310	2698	2919	2469	2758	2402	2278	1881	2164	2410	2694	2966	2578	2149
LOC105223191	14.56	13.1	14.07	9.17	14.14	12.18	14.68	15.03	16.76	13.25	13.84	13.92	13.57	15.41	12.46	14.76	12.63	14.7	12.96	13.62	12.33	15.51	13.17	12.23	12.49	13.82	15.19	12.95	15.06	13.6	250	293	264	95	261	328	379	368	389	312	326	327	252	299	268	372	349	317	290
LOC105223192	173.33	130.41	146.61	157.33	152.21	289.38	227.5	333.47	363.66	371.83	120.17	151.85	121.03	167.7	137.84	508.54	686.68	473.08	660.08	593.79	123.69	174.09	141.84	194.63	146.45	465.81	406.98	395.51	391.64	580.51	7534	7426	6986	4143	7182	19838	14781	20813	21457	22278	7226	9092	5732	8278	7532	32675	48454	25907	37641
LOC105223193	21.41	23.15	21.91	23.38	21.21	14.51	15.22	16.7	17.37	19.26	20.82	20.23	21.1	19.59	17.47	20.42	17.58	18.27	19.76	18.75	16.22	22.83	18.06	24.16	21.66	19.58	15.91	18.72	16.12	17.9	320	451	358	211	341	340	342	356	351	395	427	414	341	331	327	448	423	343	385
LOC105223194	3.07	2.71	3.05	2.95	3.84	4	4.81	3.37	3.02	2.91	2.96	3.86	2.34	3.4	3.01	3.31	2.52	1.93	2.95	4.05	3.29	2.64	2.24	2.7	3.2	3.3	2.31	2.83	2.67	2.89	71	79	77	40	92	140	167	111	94	90	89	122	54	84	87	108	91	56	85
LOC105223196	6.89	5.72	6.2	4.39	5.14	5.8	5.29	5.39	5.18	4.53	10.13	6.34	8.62	5.43	7.02	8.15	5.53	4.01	7.32	4.29	4.73	7.48	6.26	7.85	9.01	9.36	5.61	5.73	5.09	4.75	182	197	179	70	146	240	210	203	185	164	367	229	246	162	232	316	235	133	252
LOC105223198	4.9	5.27	4.35	4.14	3.69	2.91	3.26	3.47	4.1	3	4.36	4.55	4.76	2.91	4.15	3.68	2.95	3.2	4.44	3.28	4.14	4.9	4.47	5.79	4.27	2.87	2.99	2.36	3.37	2.96	100	140	97	51	81	93	100	101	113	84	122	127	105	67	106	110	97	82	118
LOC105223199	4.96	4.23	4.52	4.36	4.29	4.1	3.94	3.94	4.51	3.97	4.75	4.19	4.19	4.05	4.39	4.51	4.26	3.78	4.39	4.01	3.86	4.49	4.45	3.76	4.8	4.48	4.22	3.71	3.4	3.85	232	258	231	123	216	301	277	263	285	255	305	268	212	214	257	310	321	222	268
LOC105223200	107.02	106.1	120.89	110.11	104.81	96.4	90.5	91.48	96.27	96.82	112.25	101.72	104.03	113.13	109.44	80.71	75.75	89.4	76.87	86.23	119.95	118.68	110.63	103.13	106.58	77.45	83.39	94.38	92.42	85.27	901	1167	1122	561	954	1271	1151	1104	1105	1117	1299	1180	951	1079	1160	1002	1031	950	849
LOC105223201	0	0	0	0	0	0	0	0	0	0	0	0	0	0	0	0.48	0	0	0.08	0	0	0	0	0	0	0.08	0	0	0	0	0	0	0	0	0	0	0	0	0	0	0	0	0	0	0	7	0	0	1
LOC105223202	26.81	25.19	25.5	27.59	22.84	26.14	28.67	26.17	26.03	24.54	21.86	19.85	24.47	21.74	24.8	22.93	25.68	24.74	25.19	25.05	24.99	23.33	23.91	24.38	24.27	20.74	23.2	25.6	26.57	22.76	227	278	236	141	208	347	365	316	298	285	254	230	224	208	263	285	350	263	278
LOC105223204	0	0	0	0	0	0	0	0	0	0	0	0	0	0	0	0	0	0	0	0	0	0	0	0	0	0	0	0	0	0	0	0	0	0	0	0	0	0	0	0	0	0	0	0	0	0	0	0	0
LOC105223205	4.79	3.23	4.14	3.43	4.21	3.81	3.9	3.91	3.09	4.91	4.08	4.23	4.76	4.38	4.56	3.87	3.85	4.16	4.61	3.76	3.52	4.08	5.45	4.11	4.19	3.13	4.22	3.65	3.62	4.37	178	158	168	77	168	222	218	210	155	250	208	220	191	184	212	211	230	194	223
LOC105223206	32.29	24.97	27.88	24.99	27.99	14.98	13.37	18.77	19.5	18.18	24.2	27.81	25.63	26.27	27.03	19.05	20.39	19.88	21.83	20.21	22.58	30.26	25.57	34.71	28.96	19.91	20.15	15.12	12.86	21.33	1725	1740	1628	806	1609	1254	1074	1429	1409	1334	1774	2033	1480	1585	1809	1493	1753	1334	1521
LOC105223207	0.07	0.05	0.12	0	0.06	0.13	0.09	0.23	0	0.05	0.29	0.05	0.18	0.06	0	1.48	0	0.1	0.25	0.14	0.39	0	0	0.06	0.37	0.46	0.17	0	0.05	0	1	1	2	0	1	3	2	5	0	1	6	1	3	1	0	33	0	2	5
LOC105223208	32.05	23.85	28.09	31.26	27.16	28.23	25.11	24.42	25.31	24.35	24.84	26.65	27.08	29.42	31.63	23.32	18.65	23.56	23.67	21.76	32.32	31.46	29.57	28.25	28.1	22.96	23.52	25.44	25.87	18.83	428	415	410	252	390	591	504	465	457	446	455	487	391	444	529	457	401	395	412
LOC105223209	8.29	6.76	6.07	7.22	7.35	5.22	5.05	5.63	5.81	5.93	6.7	7.14	8.26	6.4	7.5	7.07	7.66	7.96	8.64	8.25	5.51	9.75	7.31	11.27	10.16	7.83	7.31	4.21	4.21	6.77	733.74	779.72	587.13	385.86	699.94	725.01	671.89	710.6	696.01	720.1	813.42	865.56	791.3	640.04	831.82	918.63	1091.91	884.74	996.78
LOC105223210	260.89	243.33	297.96	292.29	251.51	209.68	164.06	193.48	172.27	178.09	244.73	267.85	263.09	245.29	296.85	162.93	157.87	158.05	152.04	145.27	253.8	263.34	274.79	252.4	241	149.68	146.3	167.88	206.06	171.55	1007	1224	1257	681	1044	1269	952	1065	899	943	1296	1415	1098	1070	1435	923	981	766	765
LOC105223211	5.28	5.45	5.19	3.9	5.09	4.59	5.45	3.38	5.09	4.21	5.11	5.16	5.48	5.21	5.54	4.95	3.98	4.87	4.53	4.42	3.51	4.19	4.81	4.31	4.4	4.33	4.57	4.99	4.66	4.21	101.26	136.28	108.87	45.14	105.06	137.99	157.11	92.4	131.99	110.9	134.58	135.44	113.7	112.96	133.18	139.37	123.09	117.26	113.22
LOC105223212	4.68	3.76	3.89	3.99	4.17	3.07	3.21	3.81	2.82	3.52	4.01	4.79	4.8	3.94	4.23	3.56	4.01	4.23	4.12	3.87	4.21	4.88	4.69	4.53	3.96	3.86	4.03	2.44	2.27	3.36	313	328	284	161	300	322	323	363	255	323	368	438	347	298	354	349	432	355	359
LOC105223213	0	0.07	0.04	0	0.04	0.03	0	0.08	0	0.03	15.54	0.05	17.79	0.19	0.03	15.31	0	0.03	5.15	0.05	0.04	0.05	0	0.08	17	22.27	0.04	0	0	0.02	0	2	1	0	1	1	0	3	0	1	570	2	512	6	1	594	0	1	173
LOC105223214	15.63	16.16	13.06	13.85	14.16	13.26	10.94	13.37	14.9	12.42	15.25	15.45	13.16	14.47	14.47	13.91	13.98	13.13	13.97	16.34	12.57	11.75	14.64	15.22	13.22	12.67	12.97	15.46	13.23	13.59	346	466	316	185	337	460	364	422	446	377	463	468	315	362	401	452	498	365	403
LOC105223215	19.77	20.49	20.3	19.67	19.74	18.84	20.51	19.99	20.26	21.09	22.66	19.56	20.61	19.84	19.19	21.45	20.52	22.2	19.77	18.65	17.03	17.38	19.34	18.48	20.32	20.8	21.27	18.28	20.76	18.67	613	828	688	368	658	916	956	884	849	897	964	830	691	695	745	976	1024	864	799
LOC105223216	0.55	0.34	0.2	0.13	0.22	0.41	0.15	0.22	0.36	0	0.34	0.56	0.86	0.52	0.78	0.93	0.07	0.22	0.65	0.72	0.23	0.46	0.39	0.14	0.96	0.33	0.49	0.25	0.2	0.09	13	10	5	2	6	14	5	8	11	0	12	18	19	12	25	30	3	7	17
LOC105223217	3.1	3.34	5.02	1.94	2.88	3.9	5.03	4.5	4.33	4.26	2.44	2.62	2.62	4.99	1.54	4.92	4.98	4.14	4.68	5.27	2.44	1.73	2.46	3.18	1.9	5.75	6.43	5.56	3.51	4.62	82	108	139	31	82	159	196	169	149	153	86	95	75	141	51	191	212	136	160
LOC105223218	99.34	93.71	86.73	93.58	103.91	87.18	84.03	84.78	88.52	86.01	91.58	94.03	87.36	88.44	95.99	89.44	77.58	87.32	85.05	94.16	99.24	92.06	87.02	91.21	95.49	85.82	88.86	81.2	97.26	84.26	1465	1801	1398	833	1648	2016	1863	1783	1765	1740	1853	1898	1393	1474	1773	1936	1842	1617	1635
LOC105223219	35.67	40.08	42.81	32.42	38.49	37.86	34.18	32.68	35.3	34.52	40.33	35.32	40.63	40.37	42.27	33.29	32.07	34.2	34.46	32.28	38.39	38.78	37.69	36.2	37.47	29.39	30.32	30.97	32.39	31.16	760	1113	997	417	882	1265	1095	993	1017	1009	1179	1030	936	972	1128	1041	1100	915	957
LOC105223220	29.53	32.02	29.61	33.63	35.09	23.62	27.12	26.18	28.76	26.91	31.08	41.11	37.34	28.95	33.06	27.24	27.36	25.36	28.91	32.78	28.62	33.15	28.55	37.85	38.09	26.51	32.95	22.37	24.59	23.99	1464	2071	1600	1015	1880	1804	1958	1829	1926	1796	2136	2823	2014	1597	2025	1947	2138	1569	1849
LOC105223221	30.5	29.95	31.06	30.01	29.34	26.72	28.96	29.26	28.05	29.82	27.26	27.33	26.43	29.89	28.65	25.68	29.33	26.67	23.67	24.32	26.26	28.05	30.1	26.48	23.1	23.77	25.97	27.82	29.92	27.13	522	668	581	310	540	717	745	714	649	700	640	640	489	578	614	645	808	573	528
LOC105223222	19.36	17.27	16.31	18.06	18.7	16.86	17.1	19.05	16.82	18.51	19.46	17.34	15.64	16.21	16.37	20.55	18.38	20.1	19.38	18.58	16.58	18.09	18.06	20.37	19.85	20.5	18.79	14.38	15.07	16.02	744	865	685	419	773	1016	988	1044	874	976	1026	912	650	704	788	1159	1137	970	971
LOC105223223	0.12	0.15	0.05	0.09	0	0.28	0.26	0.32	0.45	0.22	0.06	0.2	0.1	0.11	0.07	0.18	0.12	0.36	0.2	0.38	0.08	0.04	0.08	0.06	0.02	0.24	0.16	0.1	0.27	0.2	7	11	3	3	0	25	22	26	35	18	5	16	6	7	5	15	11	27	15
LOC105223224	15.09	10.94	15.9	11.57	15.53	18.37	14.16	12.8	16.14	14.63	14.09	12.34	10.7	12.57	14.39	15.67	13.37	17.3	15.54	16.24	11.78	14.96	14.99	10.21	12.76	14.59	14.38	15.74	13.19	13.4	309	292	356	143	342	590	436	374	447	411	396	346	237	291	369	471	441	445	415
LOC105223225	18.56	18.25	18.08	16.15	18.69	16.31	13.79	13.82	15.54	14.39	20.74	18.51	19.38	18.33	18.68	17.66	14.13	14.16	14.93	16.11	17.22	19.88	19.26	17.01	20.08	15.47	16.21	13.42	13.66	15.22	760	974	809	399	823	1047	849	807	860	808	1165	1037	858	848	958	1061	931	728	797
LOC105223226	33.9	26.52	30.72	30.96	35.06	43.25	31.24	32.94	27.28	32.19	32.91	31.78	30.29	34.39	33.15	32.9	26.2	33.85	26.9	38.2	41.29	39.29	37.76	32.37	33.06	31.09	26.18	35.46	45.42	28.64	205	209	203	113	228	410	284	284	223	267	273	263	198	235	251	292	255	257	212
LOC105223227	129.96	126.6	112.41	113.73	124.17	109.07	106.04	120.97	122.78	120.51	117.58	124.28	122.3	122.37	117.53	130.76	131.34	135.31	138.08	137.42	116.19	134.37	118.29	138.99	125.32	125.32	132.35	119.39	118.64	125.19	5238	6650	4952	2767	5382	6893	6425	6953	6691	6663	6502	6856	5330	5574	5933	7735	8522	6848	7255
LOC105223228	6.16	7.56	6.08	7.07	7.94	6.6	5.9	8.29	7.53	8.74	5.56	7.02	7.29	8.06	6.88	10.29	9.84	9.54	8.69	10.02	4.68	7.49	9.33	10.2	9.35	8.98	10.56	7.89	6.59	7.98	75	120	81	52	104	126	108	144	124	146	93	117	96	111	105	184	193	146	138
LOC105223229	0.08	0.09	0.28	0.13	0.21	0.24	0.23	0.19	0.2	0.06	0.03	0.08	0.07	0.23	0.06	0.13	0.31	0.09	0.03	0.3	0.31	0.19	0	0.1	0.17	0.09	0.19	0.09	0.22	0.15	2	3	8	2	6	10	9	7	7	2	1	3	2	7	2	5	13	3	1
LOC105223230	0	0.11	0	0.08	0	0.25	0.58	0.27	0.5	0.56	0	0	0.13	0.17	0	0.56	0.3	0.58	0.37	0.6	0.11	0	0.22	0	0	0.67	0.65	0.5	0.42	0.36	0	3	0	1	0	8	18	8	14	16	0	0	3	4	0	17	10	15	10
LOC105223231	0	0	0	0	0	0	0	0	0	0.04	0.12	0	0	0	0	0.08	0	0	0	0	0	0	0	0	0	0.04	0	0	0	0.03	0	0	0	0	0	0	0	0	0	1	3	0	0	0	0	2	0	0	0
LOC105223232	4.2	1.29	3.75	2.26	2.34	9.55	6.18	3.35	5.01	3.33	2.41	1.96	1.26	2.65	0.96	6.05	12.43	6.32	6.73	3.74	1.19	3.28	1.36	1.17	1.23	9.91	4.27	5.96	5.18	4.38	80	32	78	26	48	285	177	91	129	87	63	51	26	57	23	169	381	151	167
LOC105223233	0	0	0.15	0	0	0	0	0	0	0	20.34	0	27.86	0	0	21.54	0	0	7.83	0	0	0	0	0	23.26	35.57	0.07	0.06	0	0	0	0	2	0	0	0	0	0	0	0	339	0	366	0	0	384	0	0	124
LOC105223234	3.7	3.05	3.57	4.65	5.03	2.71	1.59	3.5	3.39	2.34	4.14	3.35	3.61	4.3	3.61	3.59	2.98	3.11	1.94	3.68	3.25	4.19	3.39	4.1	2.29	2.79	2.55	3.34	3.1	3.74	54	58	57	41	79	62	35	73	67	47	83	67	57	71	66	77	70	57	37
LOC105223235	0.47	0.24	0.14	0.17	0.14	0.07	0.14	0.18	0.12	0.11	0.34	0.23	0.29	0.37	0.46	0.11	0.1	0.21	0.08	0.04	0.56	0.13	0.23	0.14	0.17	0.16	0.09	0.2	0.04	0.15	9	6	3	2	3	2	4	5	3	3	9	6	6	8	11	3	3	5	2
LOC105223236	11.87	13.96	20.04	12.9	13.76	12.86	12.62	11.59	13.03	14.6	13.53	12.62	12.01	13.27	12.22	9.41	14.87	14.08	13.25	13.44	15.89	11.78	17.79	11.98	15.3	10.27	13.42	16.25	11.35	16.37	349	535	644	229	435	593	558	486	518	589	546	508	382	441	450	406	704	520	508
LOC105223237	0.73	0.52	0.47	0.4	0.35	0.51	1.09	0.7	1.19	1.16	0.96	0.53	0.6	0.48	0.75	1.19	0.94	0.9	1.09	1.02	0.61	1.24	0.94	0.46	0.54	0.99	0.61	0.89	0.94	1.01	27	25	19	9	14	30	61	37	60	59	49	27	24	20	35	65	56	42	53
LOC105223238	1.5	1.85	1.95	1.84	1.6	1.17	1.36	1.49	2.24	1.58	1.9	1.54	1.95	1.61	1.66	1.85	1.65	1.45	1.7	1.6	1.32	1.97	2.35	1.34	1.83	1.67	1.62	1.52	1.13	1.85	93	150	132	69	107	114	127	132	188	135	162	131	131	113	129	169	165	113	138
LOC105223239	1.6	0.54	0.81	0.59	1.16	1.02	1.06	0.25	0.79	1.16	0.91	0.13	0.66	0.94	0.71	0.73	0.99	0.42	0.95	0.64	1.27	1.55	0.2	0.79	0.59	0.55	1.05	1.4	0.91	0.82	9	4	5	2	7	9	9	2	6	9	7	1	4	6	5	6	9	3	7
LOC105223240	9.31	6.18	10.11	9.67	8.66	7.65	7.24	5.42	8.87	7.13	7.59	6.23	10.07	6.98	8.19	9.14	7.65	9.43	6.9	5.96	5.25	7.3	6.92	4.37	7.58	8.87	6.95	4.85	5.88	6.54	59	51	70	37	59	76	69	49	76	62	66	54	69	50	65	85	78	75	57
LOC105223241	26.8	27.75	32.44	32.61	28.12	32.14	29.5	29.18	32.01	28.96	32.5	30.06	26.32	28.85	30.11	29.97	30.86	27.76	28.47	29.02	20.72	25.5	25.61	31.9	25.69	25.48	33.43	29.26	32.65	27.22	226	305	299	166	255	425	374	351	365	335	376	347	240	275	318	371	419	294	313
LOC105223242	2.22	1.09	3.6	3.68	1.48	4.69	4.02	2.88	3.24	4.28	13.03	2.29	13.48	1.81	2.5	13.5	4.07	5.03	6.38	2.73	2.37	2.78	2.11	2.09	13.1	15.44	2.17	2.29	2.37	3.11	39	25	69	39	28	129	106	72	77	103	314	55	256	36	55	348	115	111	146
LOC105223244	35.59	39.79	41.45	42.64	37.47	56.28	51.96	43.27	47.78	57.42	51.63	37.3	52.79	39.44	31.25	75.93	80.39	58.63	64.01	57.77	40.33	34.18	40.62	33.31	49.51	98.29	44.87	56.83	57.43	64.53	1022	1489	1301	739	1157	2534	2243	1772	1855	2262	2034	1466	1639	1280	1124	3200	3716	2114	2396
LOC105223245	24.48	26.89	21.47	21.6	25.81	25.21	23.26	27.88	27.5	27.34	22.56	28.88	26.01	25.91	24.42	28.67	29.42	28.57	31.58	32.75	24.06	29.62	25.11	29.13	28.98	31.18	34.66	22.7	20.88	28.46	3078	4406	2950	1639	3490	4971	4397	5000	4675	4715	3891	4970	3536	3682	3845	5291	5956	4511	5176
LOC105223246	102.48	107.84	102.32	95.15	98.74	102.08	99.96	102.14	109.28	103.32	94.71	91.25	101.57	95.67	98.18	107.03	110.26	113.58	114.42	116.36	98.19	96.76	101.58	106.58	108.39	107.58	114.84	107.23	109.53	113.6	1381	1894	1507	774	1431	2157	2025	1963	1991	1910	1751	1683	1480	1457	1657	2117	2392	1922	2010
LOC105223247	9.12	11.16	9.62	7.93	11.19	3.78	3.86	4.79	2.35	3.49	10.57	13.29	16.76	13.6	17.31	4.29	2.09	2.66	3.31	5.4	13.6	14.53	13.07	15.31	11.61	4.8	2.45	4.42	3	2.24	370	593	430	195	492	241	235	280	128	193	592	745	742	628	889	258	136	134	176
LOC105223248	0	0.04	0	0	0	0	0	0	0	0	0	0.03	0	0.04	0	0	0	0	0	0	0	0	0	0	0.05	0	0	0.04	0	0	0	1	0	0	0	0	0	0	0	0	0	1	0	1	0	0	0	0	0
LOC105223249	0.07	0	0.06	0	0	0	0.09	0	0.05	0	0	0	0	0	0.06	0	0.04	0.11	0	0	0	0	0	0	0.08	0	0	0	0	0	1	0	1	0	0	0	2	0	1	0	0	0	0	0	1	0	1	2	0
LOC105223250	37.06	29.19	28.74	29.31	27.93	23.14	29.04	28.38	27.01	26.36	29.04	29.71	28.99	30.64	27.81	28.44	26.82	29.15	29.62	26.84	30.64	30.28	32.02	35.05	32.68	25.88	31.8	24.07	22.92	29.54	1754	1821	1525	878	1471	1738	2079	1934	1742	1717	1922	1977	1545	1660	1658	1990	2102	1768	1830
LOC105223251	35.33	41.53	44.23	42.52	43.36	45.59	45.08	47.08	41.1	47.56	33.46	41	40.45	36.14	42.06	38.42	40.7	39.72	36.46	41.61	43.08	37.85	42.99	40.87	36.13	43.85	41.54	46.66	48.05	35.25	391	599	535	284	516	791	750	743	615	722	508	621	484	452	583	624	725	552	526
LOC105223252	1.17	0.73	0.7	0.91	1.3	1.23	0.94	0.91	0.83	1.02	0.84	1.08	1.31	0.93	1.46	1.34	0.62	1.2	1.6	1.1	0.77	1.45	1.37	1.49	1.97	1.18	1.84	0.65	0.83	1.02	83	67	54	39	99	137	100	92	79	99	82	105	100	74	129	139	71	107	148
LOC105223253	0	0	0.05	0	0	0	0.04	0	0	0	0	0.04	0	0	0	0.08	0.04	0	0	0	0	0	0	0	0	0	0	0	0	0	0	0	1	0	0	0	1	0	0	0	0	1	0	0	0	2	1	0	0
LOC105223254	18.55	19.02	18.03	17.95	25.34	12.36	16.05	11.51	16.64	10.77	19.39	18.83	17.46	17.43	22.68	16.22	10.5	14.25	15.24	13.24	17.76	19.7	18.28	18.93	14.67	13.78	15.01	12.42	15.23	14.36	113	151	120	66	166	118	147	100	137	90	162	157	115	120	173	145	103	109	121
LOC105223255	0.38	0.28	0.45	0.45	0.69	0.3	0.04	0.29	0.53	0.42	0.53	0.3	0.44	0.62	0.37	0.6	0.55	0.42	0.58	0.81	0.29	0.7	0.45	0.72	0.52	0.35	0.72	0.37	0.33	0.68	24	23	31	17	46	29	4	26	45	36	45	26	30	44	29	55	55	33	47
LOC105223256	0	0	0	0	0	0	0	0	0	0	0	0	0	0.34	0	0	0	0	0	0	0	0	0	0	0	0	0	0	0	0	0	0	0	0	0	0	0	0	0	0	0	0	0	3	0	0	0	0	0
LOC105223257	14.79	14.72	13.98	15.38	13.23	14.49	16.41	15.49	16.13	14.19	16.25	14.51	16.2	14.98	14.71	16.91	15.88	15.53	16.56	14.61	12.72	14.12	13.13	13.31	14.56	16.8	16.66	15.03	12.47	15.05	575	746	594	361	553	883	959	859	848	757	867	772	681	658	716	965	994	758	839
LOC105223258	0	0	0.22	0	0	0.38	0	0	0	0	0	0	0	0	0	0	0	0.09	0	0	0	0	0.27	0	0.27	0	0	0	0	0	0	0	2	0	0	5	0	0	0	0	0	0	0	0	0	0	0	1	0
LOC105223259	0.68	0.39	0.39	1.69	0.39	0.43	0.56	0.18	0.19	0.06	0.37	0.43	0.79	1.43	0.14	0.23	0.26	0.2	0.2	0.37	0.4	0.74	0.76	0.08	0.47	0.46	0.14	0.07	0	0.44	8	6	5	12	5	8	10	3	3	1	6	7	10	19	2	4	5	3	3
LOC105223260	31.17	31.88	35.44	30.22	31.61	33.06	37.24	37.29	35.04	27.51	29.87	26.85	28.65	25.88	28.46	32.41	39.38	38.37	34.45	37.98	30.65	33.68	29.54	37.02	29.05	29.95	41.36	36.06	33.91	33.46	456	606	566	268	497	760	819	778	691	553	600	538	451	426	520	693	931	701	658
LOC105223261	64.67	55.66	53.39	58.71	56.45	43.17	46.31	47.68	48.62	46.97	57.78	53.16	56.68	54.61	51.37	50.08	55.79	50.76	50.17	49.43	43.74	61.45	51.67	63.6	55.46	54.25	52.97	53.76	51.73	51.6	1468	1654	1330	796	1363	1529	1586	1541	1483	1478	1798	1658	1380	1396	1455	1672	2023	1447	1492
LOC105223262	19.41	16.23	17.26	18.86	17.65	17.01	14.55	17.76	17.09	17.45	19.22	17.45	20.5	17.62	19.64	20.73	17.39	15.43	18.57	18.07	17	18.33	16.62	18.74	19.59	17.29	17.04	18.9	17.33	17.85	646	704	628	379	632	888	728	843	769	797	878	795	738	663	819	1013	932	645	806
LOC105223263	63.28	75.15	70.52	77.91	67.92	84.81	83.76	84.06	88.15	90.5	67.11	70.71	68.62	68	69.57	91.34	83.4	82.1	88.14	91.69	68.76	65.13	70.66	71.88	72.85	90.25	86.59	90.75	87.93	87.04	1707	2650	2097	1271	1967	3574	3357	3225	3200	3361	2464	2616	2003	2055	2305	3626	3592	2754	3111
LOC105223264	7.44	8.11	6.73	5.71	6.77	8.04	7.6	7.3	7.99	5.25	6.79	8.07	6.23	7.48	6.31	6.08	4.67	7.11	4.92	6.48	7.35	5.48	4.84	4.97	6.73	5.55	4.97	5.8	6.98	5.45	95	135	94	44	93	161	146	133	138	92	119	141	86	108	101	114	96	114	82
LOC105223265	6.7	12.3	14.34	13.88	13.27	8.93	9.16	12.32	7.57	9.94	10.04	10.03	9.43	11.62	9.91	5.52	8.81	9.16	6.74	7.67	14.92	10.53	12.48	17	14.11	7.64	6.25	8.78	7.38	8.29	148	354	346	185	315	309	304	388	226	301	304	303	225	290	274	179	313	254	194
LOC105223266	1.38	2.65	1.35	1.91	2.2	1.02	0.92	2.11	0.99	1.98	0.98	0.96	1.15	1.33	1.02	1.75	1.59	1.66	2.01	1.67	1.26	1.08	1.15	1.14	1.29	1.53	1.9	2.25	1.59	2.36	43	108	46	36	74	50	43	94	42	85	42	41	39	47	40	80	80	65	82
LOC105223267	719.71	610.94	596.55	539.86	642.14	506.02	565.07	654.31	542.34	565.8	568.15	521.86	619.05	582.36	617.09	498.81	451.69	495.49	470.73	475.63	724.45	517.15	550.15	709.57	600.42	513.34	530.6	553.26	593.91	574.61	9308	10261	8431	4205	8911	10234	10963	12035	9423	10007	10086	9202	8639	8498	9968	9438	9340	7991	7880
LOC105223268	2.55	3.04	2.21	1.33	2.5	1.84	1.92	1.74	2.78	1.81	2.05	2.55	2.61	2.2	1.71	3.15	1.63	2.67	2.52	2	2.15	1.68	1.43	2.82	2.1	1.96	2.5	1.59	1.91	1.58	38	59	36	12	40	43	43	37	56	37	42	52	42	37	32	69	39	50	49
LOC105223269	166.11	173.39	158.67	147.64	149.87	156.06	208.27	188.6	193.34	171.05	139.75	165.99	137.19	188.69	159.63	166.29	223.85	215.58	233.86	204.8	139.02	180.9	173.87	223.02	172.05	189.43	223.79	160.86	154.06	239.81	9428	12709	9666	5042	8911	13572	17851	14942	14448	13065	10832	12707	8259	11929	10954	13500	19980	15012	16797
LOC105223270	2.38	3.23	2.5	1.61	2.9	1.46	2.5	1.92	1.91	1.67	3.09	2.6	3.05	2.45	2.96	2.2	1.39	1.64	1.83	2.14	2.94	3.64	3.14	3.26	2.86	2.74	1.84	1.88	2.36	1.89	81	143	93	33	106	78	128	93	88	78	144	121	112	94	126	110	76	70	81
LOC105223271	18.46	19.12	22.37	20.26	20.11	21.44	23.38	22.42	19.26	21.42	20.91	18.17	17.12	17.48	18.63	15.26	17.12	19.47	15.15	19.38	20.55	20.36	21.29	16.5	18.97	16.39	16.32	21.13	19.92	17.62	314	424	416	208	368	572	598	544	443	500	488	423	315	336	397	381	469	416	336
LOC105223272	5.02	2.25	6.04	2.89	3.52	2.8	2.1	2.42	2.08	2.45	2.73	1.55	4.02	4.75	5.44	1.65	2.67	3.86	2.48	2.04	2.13	2.29	3.3	3.69	6.32	1.97	2.34	1.31	1.83	1.86	118	69	155	41	89	103	74	81	66	79	88	50	102	126	160	57	101	114	76
LOC105223273	0.24	0.19	0.33	0.18	0.29	0.19	0.17	0.23	0.47	0.25	0.12	0.22	0.28	0.21	0.28	0.36	0.59	0.54	0.63	0.51	0.13	0.36	0.36	0.16	0.44	0.29	0.2	0.2	0.23	0.32	15	16	23	7	20	19	16	21	40	22	10	19	19	15	22	33	60	43	52
LOC105223275	49.97	44.73	44.52	46.43	50.33	46.79	50.85	52.82	49.41	49.18	45.9	45.26	51.23	45.74	43.48	55.5	48.74	51.94	50.89	50.83	44.61	45.39	47.94	41.61	48.69	50.85	47.85	53.52	49.82	46.64	1068	1246	1040	599	1157	1568	1634	1610	1428	1442	1346	1324	1184	1105	1164	1741	1677	1394	1418
LOC105223276	14.33	16.71	19.8	16.53	20.51	18.37	17.94	17.14	17.46	16.08	14.75	18.99	18.97	15.66	17.05	16.27	19.55	19.36	17.14	21.23	18.88	14.93	20.7	18.71	14.12	16.45	18.32	20.82	17.03	18.59	102	155	154	71	157	205	192	174	168	157	144	185	146	126	152	170	224	173	159
LOC105223277	10.91	11.8	11.25	10.86	14.4	11.29	12.16	13.67	13.13	11.25	11.54	12.21	12.99	14.02	10.75	11.03	10.45	10.76	10.01	10.83	12.96	13.93	11.68	11.62	8.47	10.77	10.46	12.8	12.46	13.31	188	265	212	113	267	305	315	336	306	266	273	287.92	242	273	232	279	290	232.93	225
LOC105223278	0.86	0.51	1.14	0.73	0.8	0.63	0.62	0.66	0.63	0.6	0.54	0.53	0.64	0.83	0.53	0.49	0.62	0.86	0.61	0.56	0.46	0.55	1	0.64	0.99	0.55	0.61	0.61	0.63	0.78	31	24	45	16	31	36	34	34	31	30	27	26.08	25	34	24	26	36	39.07	29
LOC105223279	0.12	0.19	0.3	0.27	0.11	0.08	0.16	0.17	0.3	0.21	0.18	0.06	0.23	0.04	0.16	0.06	0.28	0.13	0.22	0.12	0.05	0.1	0.32	0.22	0.36	0.03	0.03	0.22	0.12	0.07	3	6	8	4	3	3	6	6	10	7	6	2	6	1	5	2	11	4	7
LOC105223280	0.35	0.46	0.41	0.21	0.38	0.12	0.19	0.13	0.22	0.26	0.16	0.21	0.09	0.19	0.14	0.29	0.34	0.31	0.36	0.25	0.14	0.15	0.32	0.35	0.62	0.51	0.74	0.1	0	0.23	6	11	9	2	7	3	5	3	5	6	4	6	2	4	3	7	9	7	8
LOC105223282	0	0.12	0	0.17	0	0	0	0	0.11	0	0.18	0	0.28	0	0	0.14	0	0	0.23	0	0	0	0	0	0	0.15	0.04	0.08	0	0	0	3	0	2	0	0	0	0	3	0	5	0	6	0	0	4	0	0	6
LOC105223283	14.54	11.8	13.4	11.77	14.5	12	12.21	14.79	13.29	13.84	13.85	15.21	13.83	12.82	15.14	11.8	13.11	11.47	13.74	12.84	12.29	12.72	14.99	13.36	15.31	11.34	12.19	13.38	11.51	12.58	178	190	178	86	191	232	226	257	221	232	233	255	183	176	231	212	257	177	220
LOC105223284	1.77	1.91	1.49	1.13	2.84	1.83	1.49	1.79	1.87	1.84	6.48	2.51	5.92	1.91	2.29	6.78	2.3	2.21	3.4	1.73	1.29	2.47	1.35	2.49	5.54	9.69	2.16	1.56	1.63	2.89	52	71	47	20	82	81	62	75	72	68	249	93	179	59	73	274	107	73	123
LOC105223285	5.37	3.46	4.18	5.01	5.26	3.13	1.22	3.52	2.74	2.83	4.04	5.17	3.17	4.4	3.01	3.19	2.8	3.64	4.42	3.77	2.92	6.78	4.17	4.64	3.83	3.25	4.06	1.94	2.25	4.17	94	79	80	53	99	86	32	88	65	68	97	124	60	87	66	82	79	80	101
LOC105223286	0	0	0.06	0	0	0	0.08	0	0	0	0	0	0	0	0	0.02	0	0	0	0.02	0.08	0.04	0	0	0	0	0	0	0	0.02	0	0	2	0	0	0	4	0	0	0	0	0	0	0	0	1	0	0	0
LOC105223287	53.77	52.56	52.02	56.46	61.19	58.88	47.35	51.16	50.48	50.94	65.93	46.42	63.27	51.9	57.09	61.74	48.81	51.76	48.42	51.28	58.31	54.21	62.22	53.07	68.67	63.54	51.1	52.33	51.57	44.92	661	842	699	419	809	1135	875	897	839	859	1112	781	841	721	879	1114	966	799	776
LOC105223289	3.09	3.52	3.09	2.94	1.97	2.96	2.25	3.25	2.84	2.34	2.21	2.39	2.7	3.19	1.55	2.5	2.35	2.55	2.42	2.08	2.66	3.22	3.16	1.64	2.3	3.04	2.28	1.99	3.05	2.41	54	80	59	31	37	81	59	81	67	56	53	57	51	63	34	64	66	56	55
LOC105223290	15.88	13.25	12.55	14.34	15.62	12.26	14.28	13.69	13.45	13.13	14.26	16	14.89	12.03	14.52	15.34	12.31	12.69	14.84	13.64	13.59	17.37	15.19	18.3	16.19	13.54	13.71	11.53	12.3	12.45	367	399	317	200	388	444	496	451	420	416	452	506	372	314	420	520	458	368	447
LOC105223291	9.7	12.49	11.32	11.32	10.63	7.19	7.83	7.16	6.63	8.04	12.69	11.22	12.08	10.89	11.7	8.72	5.37	7.41	8.25	5.24	10.51	11.92	13.45	11.36	11.27	7.48	6.29	7.22	7.69	8	188	316	235	130	225	212	223	195	175	204	329	281	251	233	282	239	167	176	197
LOC105223292	141.04	230.92	95.36	261.65	326.97	280.07	213.55	139.93	181.27	174.9	205.6	343.46	300.53	203.49	292.12	170.87	76.34	88.67	142.31	226.06	269.6	340.66	282.47	211.58	343.42	186.19	309.29	167.69	226.55	107.33	793	1692	586	888	1977	2469	1805	1122	1378	1349	1586	2643	1827	1293	2057	1410	691	626	1043
LOC105223293	11.92	10.27	9.19	8.39	9.07	7.41	8.92	8.01	8.89	9.9	8.65	9.55	8.82	9.66	10.63	8.91	9.04	9.1	8.34	7.96	11.71	10.55	9.09	11.67	9.13	9.38	8.75	8.25	8.23	9.82	417	470	352	180	349	411	475	410	425	476	415	462	340	389	462	463	518	403	386
LOC105223294	66.68	62.59	51.54	57.33	56.13	37.3	40.59	53.78	52.4	53.82	33.24	51.62	45.06	67.75	57.13	74.95	81.54	105.84	117.92	83.58	46.17	36.76	48.95	94.77	69.38	60.83	73.41	48.92	47.42	86.75	1025	1254	866	532	928	899	938	1179	1089	1135	701	1086	749	1177	1100	1691	2018	2043	2363
LOC105223295	99.56	161.59	236.35	109.31	202.86	16.47	26.08	26.06	37.45	38.25	138.25	157.06	126.53	184.94	138.37	69.71	53.51	36.25	53.39	53.19	159.73	116.96	236.16	139.33	194.22	58.49	30.61	28.57	27.66	35.69	3362	7111	8723	2228	7367	872	1324	1255	1710	1772	6405	7259	4620	7058	5852	3455	2909	1537	2350
LOC105223296	0.02	0	0	0.08	0	0	0	0	0	0	3.02	0.01	3.5	0.03	0	5.5	0.04	0.06	2.44	0	0	0.04	0	0	5.15	7.02	0.01	0	0.02	0.01	1	0	0	3	0	0	0	0	0	0	254	1	232	2	0	495	4	5	195
LOC105223297	21.69	28.23	31.64	25.6	30.13	22.38	17.06	22.82	22.44	22.56	27.74	30.67	29.02	30.7	28.72	23.43	25.24	26.79	25.83	24.7	33.58	30.84	35.01	32.13	32.78	23.32	22.34	23.23	22.16	26.29	1231	2020	1937	856	1838	1948	1454	1819.48	1716	1726	2122	2336	1754	1946	1989	1945	2254	1896	1897
LOC105223298	7	7.26	7.68	7.95	6.71	6.99	7.73	7.77	7.48	6.76	8.2	8.78	8.3	7.07	6.96	7.77	6.99	7.12	6.27	6.71	8.15	7.1	6.6	6.68	7.37	7.59	6.79	6.67	7.31	5.17	191	258	229	131	197	299	317	302.52	276	253	307	328	245	218	238	311	307	244	223
LOC105223300	0.5	0.39	0.23	0.21	0.58	0.24	0.33	0.09	0.28	0.46	0.27	0.18	0.46	0.33	0.4	0.17	0.55	0.2	0.1	0.09	0.15	0.16	0.28	0.11	0.28	0.29	0.64	0.49	0	0.58	4	4	2	1	5	3	4	1	3	5	3	2	4	3	4	2	7	2	1
LOC105223301	1701.8	1633.51	1762.55	1811.14	1843.65	1338.61	1214.19	1280.29	1218.91	1282.14	1748.38	1768.36	1691.99	1773.56	1848.68	1026.17	1034.44	1091.59	1039.34	1104.51	1754.37	1762.84	1717.18	1658.76	1715.39	1014.93	1116.81	1265.35	1280.04	1149.93	13973	17479	15817	8976	16279	17233	14987	14991	13531	14441	19695	19872	15021	16457	19010	12366	13673	11254	11124
LOC105223302	11.32	14.74	10.4	13.65	12.45	18.09	19.72	17.05	16.52	15.73	11.27	15.58	13.53	11.85	14.24	14.2	15.08	13.61	16.29	16.83	13.35	13.33	12.29	13.78	12.69	16.05	16.48	14.48	15.57	14.47	257	436	258	187	304	644	673	552	507	490	351	484	332	304	405	473	551	388	482
LOC105223303	7.15	6.8	6.75	5.37	5.41	4.4	5.38	4.99	5.08	4.47	11.79	6.36	10.57	7.14	6.69	9.3	4.17	3.64	6.09	4.56	4.48	6.64	5.34	6.64	8.99	12.06	4.28	4.29	3.64	3.87	251	310	258	113	207	242	283	249	241	214	584	303	423	285	288	486	234	161	284
LOC105223304	4.16	4.85	4.24	3.31	4.58	2.24	2.06	2.31	2.12	2.46	6.05	6.12	5.64	4.5	6.42	2.45	1.87	1.66	2.35	2.25	6.59	4.82	4.36	4.15	4.71	2.95	2.19	1.77	1.64	1.83	148	225	165	71	175	125	110	117	102	120	295	298	217	181	286	128	107	74	109
LOC105223305	14.72	16.91	15.75	15.41	18.11	12.89	10.72	9.65	8.29	11.58	21.99	22.37	16.46	24.62	18.36	10.03	10.37	8.63	8.93	9.89	19.07	16.39	17.13	14.86	18.4	10.15	8	10.28	12.25	9.9	201	301	235	127	266	276	220	188	153	217	412	418	243	380	314	201	228	148	159
LOC105223306	266.72	268.07	272.23	260.6	291.45	304.73	289.09	272.55	295.27	287.95	267.85	312.02	280.82	251.07	266.61	290.99	251.77	294.89	306.49	341.47	246.38	307.26	275.72	271.7	287.45	292.34	360.42	235.18	318.1	257.64	6784	8886	7568	4001	7972	12153	11054	9886	10154	10047	9347	10862	7723	7217	8493	10863	10309	9418	10162
LOC105223307	58.72	52.17	48.42	45.59	50.24	36.4	42	54.81	52.41	50.57	29.88	36.49	30.2	57.27	48.29	50.72	64.38	84.51	80.18	75.05	38.42	38.72	37.74	70.71	57.91	44.89	68.11	45.3	37.27	71.94	441	535	412	218	410	429	478	601	566	527	319	396	239	521	457	595	808	829	819
LOC105223308	0	0.14	0	0	0	0	0	0	0	0	0	0	0	0	0	0	0	0	0	0	0	0	0.1	0	0	0.07	0	0	0	0	0	2	0	0	0	0	0	0	0	0	0	0	0	0	0	0	0	0	0
LOC105223309	25.08	25.54	25.65	21.27	24.74	21.7	19.55	22.91	21.24	22.18	24.49	23.2	22.8	23.2	26.57	18.98	20.58	20.82	21.54	19.79	23.62	26.45	22.47	25.12	22.59	19.62	20.66	18.84	18.6	22.82	703	933	786	360	746	954	824	916	805	853	942	890	691	735	933	781	929	733	787
LOC105223310	25.08	23.22	23.04	23.47	25.33	21.85	22.47	21.77	26.68	25.14	23.49	23.02	22.35	21.32	23.38	25.42	22.4	25.06	24.33	24.38	23.96	26.69	22.81	21.77	21.83	23.74	24.2	22.72	23.58	23.9	806	979	809	448	877	1105	1070	1010	1161	1113	1043	1015	782	777	946	1197	1160	1017	1043
LOC105223311	1.19	0.96	0.7	0.98	1.41	0.95	1.11	0.66	0.98	0.98	1.81	1.7	2.3	1.38	1.47	1.69	0.63	0.42	1.05	0.7	1.44	0.85	0.96	1.02	2.04	1.42	0.67	0.43	0.63	0.9	54	57	35	27	69	68	76	43	60	61	113	106	113	71	84	113	46	24	62
LOC105223312	82.97	91.31	85.49	85.13	90.68	108.19	121.14	137.53	107.86	127.15	82.81	76.71	73.26	85.76	78.81	101.91	108.82	109.08	107.86	110.95	97.83	76.62	77.29	71	69.52	95.01	106.19	113.06	107.49	111.7	2575	3687	2899	1595	3023	5266	5654	6081	4527	5412	3529	3259	2456	3001	3064	4643	5437	4251	4363
LOC105223314	22.46	33.34	29.29	29.69	33.7	34.77	31.48	33.99	26.82	40.07	31.35	34.84	30.5	25.44	37.91	32.15	36.62	36.65	37.1	44.04	26.53	34.38	30.83	25.57	30.5	28.88	33.93	28.95	29.56	29.66	971	1879	1384	775	1567	2357	2046	2096	1568	2377	1860	2062	1426	1243	2053	2040	2549	1990	2091
LOC105223315	0.23	0.26	0.21	0.29	0.27	0.22	0	0.08	0.13	0.04	0.29	0.13	0.32	0	0.14	0.24	0.04	0.37	0.13	0.13	0.21	0.36	0.13	0.05	0.26	0.09	0.05	0.14	0	0.07	4	6	4	3	5	6	0	2	3	1	7	3	6	0	3	6	1	8	3
LOC105223316	23.51	21.41	22.6	20.7	22.32	15.62	14.85	15.56	16.45	15.4	22.17	20.12	23.38	18	21.99	14.51	14.48	16.56	13.21	14.18	22.57	23.12	25.29	21.86	23.73	14.12	14.34	13.67	15.94	12.86	572	679	601	304	584	596	543	540	541	514	740	670	615	495	670	518	567	506	419
LOC105223317	16.26	14.26	11.58	10.03	12.24	9.15	7.24	14.65	7.93	9.85	14.73	14.23	17.73	11.88	13.15	30.11	29.71	28.2	32.9	14.71	8.11	15.66	11.46	21.33	22.19	20.16	11.53	6.88	6.92	10.66	461	511	355	167	365	397	305	590	302	376	588	546	553	378	456	1317	1395	1026	1253
LOC105223318	11.11	16.67	13.45	13.09	13.41	28.59	28.64	18.02	27.51	21.03	16.52	11.14	11.24	10.91	11.87	28.73	19.33	21.57	23.57	19.67	24.64	19.83	17.03	16.5	20.18	23.58	26.53	27.84	25.51	24.58	201	393	266	143	261	811	779	465	673	522	410	276	220	223	269	763	563	490	556
LOC105223319	7.44	6.61	6.45	11.24	9.95	9.07	10.33	8.51	9.17	9.61	11.22	9.44	8.81	8.77	8.65	8.09	6.89	7.07	8.41	8.34	10.08	8.48	9.25	6.41	10.2	13.37	8.29	8.23	9.53	6.01	57	66	54	52	82	109	119	93	95	101	118	99	73	76	83	91	85	68	84
LOC105223320	0	0.05	0.05	0	0.06	0.08	0.12	0.29	0.04	0.22	0	0	0	0	0	0.04	0.07	0.05	0.14	0.13	0	0	0	0	0	0.14	0.2	0	0.13	0.17	0	1	1	0	1	2	3	7	1	5	0	0	0	0	0	1	2	1	3
LOC105223321	66.58	62.91	59.89	76.02	65.68	57.46	62.99	70.9	61.23	55.59	60.91	55.55	58.56	67.67	65.47	64.22	56.24	61.72	54.1	54.49	79.69	59.48	60.34	55.19	52.75	54.32	59.61	64.02	66.21	56.74	592	729	582	408	628	801	842	899	736	678	743	676	563	680	729	838	805	689	627
LOC105223322	10.12	8.57	12.11	7.25	10.76	10.75	11.12	11.29	9.57	10.05	10.57	10.81	10.05	10.55	9.93	9.4	9.07	9.34	9.46	9.98	9.39	10.32	10.25	7.47	10.57	9.73	7.46	9.4	9.59	9.67	201	222	263	87	230	335	332	320	257	274	288	294	216	237	247	274	290	233	245
LOC105223323	34.95	32.86	29.96	30.7	36.99	32.76	32.54	31.71	27.3	28.07	33.75	35.95	33.27	31.75	34.23	30.62	24.16	26.52	25.58	26.74	34.35	30.26	29.65	30.48	32.58	31.51	28.04	29.69	28.71	25.77	745	913	698	395	848	1095	1043	964	787	821	987	1049	767	765	914	958	829	710	711
LOC105223324	46.99	41.42	36.53	46.48	43.75	37.11	43.53	39.35	39.29	37.75	42.46	35.84	45.74	42.87	44.17	33.56	33.08	35.77	35.23	33.79	41.76	38.58	39.66	35.92	41.01	36.4	35.55	36.25	38.06	34.51	705	810	599	421	706	873	982	842	797	777	874	736	742	727	830	739	799	674	689
LOC105223325	32.69	33.2	34.71	36.94	32.05	31.16	40.48	34.89	29.7	38.92	31.28	27.59	29	33.1	33.06	29.24	30.19	29.79	25.42	25.62	28.73	31.1	33.58	30.73	31.45	24.29	29.56	34.95	28.23	27.04	368	487	427	251	388	550	685	560	452	601	483	425	353	421	466	483	547	421	373
LOC105223326	655.26	665.75	634.32	597.11	614.07	682.74	729.55	739.32	686.56	737.45	569.24	544.5	536.68	584.18	549.34	678.4	698.97	698.62	675.37	655.88	630.16	580.96	611.2	630.86	532.63	753.36	715.72	715	721.42	704.26	21334	28271	22564	11739	21452	34846	35633	34361	30081	32870	25401	24225	18878	21451	22410	32357	36636	28543	28658
LOC105223328	15.39	16.87	18.51	18.82	15.95	21.46	16.72	16.45	19.57	18.54	19.02	20.72	16.13	16.73	19.61	15.78	18.76	22.24	17.32	20.92	14.12	19.79	17.64	15.72	13.67	20.44	19.92	14.79	19.43	14.38	210	300	276	155	234	459	343	320	361	347	356	387	238	258	335	316	412	381	308
LOC105223329	3.06	3.45	3.36	5.9	5.44	3.82	6.47	4.85	6.94	5.46	2.96	3.61	3.85	4.18	3.4	5.36	6.71	5.8	5.71	5.55	3.49	3.05	2.96	4.27	2.97	3.63	6.35	5.83	6.75	5.45	42	61	49	48	82	85	136	93	128	101	63	66	57	63	60	107	146	99	102
LOC105223330	76.29	81.39	78.08	85.75	86.94	83.85	79.43	80.2	83.95	81.97	74.19	80.29	80.09	74.18	81.51	79.49	78.87	79.39	81.03	82.36	79.29	77.88	78.93	72.1	71.23	73	85.69	81.88	87.96	74.59	1644	2288	1842	1113	2016	2833	2575	2467	2441	2426	2193	2370	1867	1806	2199	2515	2739	2150	2277
LOC105223331	78.44	65.09	80.47	75.8	63.54	64.2	51.73	55.22	52.35	52.15	83.04	69.69	65.43	62.25	60.5	62.35	67.33	53.5	57.1	55.54	51.95	83.94	51.85	67.72	65.51	63.78	48.21	50.16	47.39	43.72	2053	2218	2300	1198	1789	2635	2036	2062	1853	1873	2983	2495	1851	1842	1984	2396	2838	1758	1949
LOC105223332	7.62	6.72	4.55	5.77	7.5	4.03	1.29	4.82	4.6	4.17	6.53	6	5.71	7.4	6.28	4.65	4.98	4.24	5.69	4.34	7.04	9.77	5.54	8.19	7.89	3.41	4.68	3.57	3.85	5.47	153	176	100	70	162	127	39	138	125	115	180	165	124	168	158	137	161	107	149
LOC105223333	15.38	14.28	13.01	15.4	17.85	13.57	13.53	12.87	14.72	13.26	15.07	17.85	15.72	14.31	15.09	13.81	13.38	14.37	15.79	16.18	12.84	15.23	15.35	16.7	15.32	14.44	15.49	11.92	12.82	14.99	470	567	442	285	588	650	629	565	610	564	638	758	524	496	580	627	666	553	629
LOC105223334	7.98	8.74	8.72	7.22	8.11	7.92	8.66	7.99	8.66	8.38	11.23	8.53	14.6	8.74	7.61	13.27	8.17	8.15	9.74	8.33	7.78	9.45	8.11	7.83	10.84	10.97	8.25	8.21	7.99	8.29	227	324	271	124	248	353	370	324	333	327	438	332	449	281	271	554	374	291	361
LOC105223335	17.6	18.52	20.66	18.82	17.75	21.03	25.47	24.03	19.86	21.17	19.65	18.34	19.99	19.48	19.24	19.63	19.19	16.56	14.59	17.21	19.69	15.27	18.67	18.55	16.75	19.22	18.49	19.73	19.8	17.75	474	650	608	306	514	888	1031	923	723	782	726	676	582	593	649	776	832	560	512
LOC105223336	9.48	6.91	8.08	6.81	9.06	8.2	9.59	8.62	7.16	8.83	8.01	7.12	10.25	7.66	9.71	10.44	6.47	7.86	8.33	6.94	8.28	8.55	8.08	10.15	11.36	10.34	6.96	6.96	9.22	7.12	219	208	204	95	225	297	333	284	224	280	254	225	256	200	281	354	241	228	251
LOC105223337	21.55	19.94	20.77	19.03	18.77	13.2	15.24	14.45	15.37	13.25	18.84	21.8	20.75	16.71	20.23	16.6	15.36	15.61	16.4	17.29	17.84	20.13	19.98	19.9	20.3	15.89	15.84	12.35	12.67	12.91	728	878	767	388	682	699	774	696	702	614	873	1008	758	638	856	823	835	662	722
LOC105223338	5.1	4.25	5.13	3.52	5.17	4.95	4.82	5.98	5.01	5.8	6.78	5.28	6.37	5.76	5.4	6.26	5.3	5.42	7	5.87	4.61	5.4	5.68	6.04	6.9	5.82	4.63	4.87	5.13	4.69	230	250	253	96	251	350	327	385	306	359	420	326	311	294	305	415	385	307	412
LOC105223339	0.08	0	0.15	0	0.07	0.05	0	0	0	0.06	36.14	0.06	27.12	0.14	0	29.89	0.05	0.32	10.06	0.06	0	0.1	0	0	29.2	36.55	0.07	0.13	0.06	0	1	0	2	0	1	1	0	0	0	1	624	1	369	2	0	552	1	5	165
LOC105223340	0.62	0.51	0.89	0.95	0.53	0.42	0.64	0.4	0.29	0.29	2.98	0.51	1.22	0.58	0.56	2.28	0.52	0.56	1.01	0.51	0.52	0.33	0.45	0.31	2.51	3.19	0.22	0.45	0.61	0.38	14	15	22	13	13	15	22	13	9	9	93	16	30	15	16	76	19	16	30
LOC105223341	1306.18	1301.25	1421.47	1367.1	1428.86	1221.71	1053.16	1053.5	1049.04	1101.11	1324.17	1353.75	1335.3	1291.52	1428.42	913.37	940.33	967.64	903.56	983.53	1364.55	1323.18	1360.09	1291.71	1252.24	895.04	984.91	1069.49	1174.29	985.68	11905	15456	14160	7521	14005	17459	14430	13693	12927	13767	16558	16887	13159	13303	16305	12218	13797	11074	10735
LOC105223342	39.67	41.62	36.84	40.82	42.95	43.32	40.85	40.89	40.31	40.06	39.18	42.86	43.15	40.63	41.42	39.93	37.82	40.23	39.02	42.27	35.75	40.94	39.37	41.37	43.46	40.19	42.73	39.37	42.74	38.02	1150	1581	1170	716	1347	1974	1781	1694	1589	1598	1569	1711	1355	1334	1510	1708	1769	1465	1482
LOC105223343	10.89	8.4	8.92	9.57	8.73	7.07	5.7	8.46	9.19	9.03	9.12	8.64	8.84	9.5	8.69	10.82	11.29	10.72	12.81	11.81	7.77	12.52	10.07	12.62	12.1	10.87	10.15	8.08	6.03	10.63	1402	1428	1288	752	1221	1463	1123	1575	1609	1588	1642	1518	1242	1373	1412	2050	2387	1771	2164
LOC105223344	5.85	8.01	12.26	8.83	9.15	8.07	8.25	7.84	6.38	8.36	10.06	7.3	8.93	8.15	8.16	7.79	9.86	8.49	7.72	7.18	8.18	7.31	8.24	7.81	7.52	7.3	5.61	7.76	5.97	6.24	158	282	362	144	266	342	335	302	233	310	373	270	261	249	276	309	429	288	272
LOC105223345	8.98	7.73	6.62	7.08	7.92	5.67	6.9	7.6	5.92	6.45	7.05	7.56	7.78	7.95	6.98	4.48	4.16	4.54	4.15	5.01	7.96	6.6	7.18	8.83	6.64	4.84	3.26	4.83	5.18	5.83	256	283	206	120	243	258	295	306	225	252	272	294	240	254	247	185	189	161	152
LOC105223346	0.05	0	0	0	0	0.03	0.07	0	0.07	0	0	0	0	0	0	0	0.03	0.04	0.04	0	0	0	0	0	0	0	0	0	0	0.06	1	0	0	0	0	1	2	0	2	0	0	0	0	0	0	0	1	1	1
LOC105223347	0	0	0	0	0	0	0	0	0	0	8.15	0	5.39	0	0	7.25	0	0	1.67	0.11	0	0	0	0	6.25	10.65	0	0.06	0	0	0	0	0	0	0	0	0	0	0	0	144	0	75	0	0	137	0	0	28
LOC105223348	113.4	127.57	125.54	127.02	134.53	146.84	140.75	130.26	145.46	135.63	121.64	144.58	135.4	117.05	130.55	135.48	118.82	127.51	132.95	152.89	123.63	128.57	125.22	126.13	136.83	134.34	155.38	131.47	144.98	120.17	1976	2897	2391	1336	2521	4012	3687	3237	3427	3242	2908	3448	2551	2305	2849	3465	3333	2790	3020
LOC105223349	0	0	0	0	0	0	0.12	0	0	0	12.13	0	8.26	0.08	0	14.29	0	0.14	4.32	0	0	0	0	0.08	13.55	18.63	0.07	0	0.06	0.05	0	0	0	0	0	0	2	0	0	0	192	0	103	1	0	242	0	2	65
LOC105223350	0	0	0	0.13	0	0	0.16	0.06	0.06	0.11	7.52	0.12	6.56	0.07	0	7.35	0.05	0.19	3.2	0	0	0	0	0	6.86	8.98	0.07	0	0	0	0	0	0	1	0	0	3	1	1	2	131	2	90	1	0	137	1	3	53
LOC105223351	0.27	0.36	0.25	0.22	0.5	0.81	0.27	0.38	0.25	0.98	0.1	0.54	0.43	0.12	0.05	0.32	0.12	0.11	0.1	0.15	0	0	0.08	0.3	0.37	0.15	0.4	0.32	0.1	0.42	4	7	4	2	8	19	6	8	5	20	2	11	7	2	1	7	3	2	2
LOC105223352	2.08	1.99	2.1	1.79	1.89	1.45	1.79	2.25	2.07	1.89	1.65	2.11	1.66	2.07	1.72	1.72	2.25	2.46	2.42	2.08	1.58	1.92	2.05	2.15	1.87	2.01	2.08	1.55	1.03	2.43	352	439	387	183	344	385	456	543	474	438	383	488	304	396	365	427	611	522	533
LOC105223353	0	0	0	0	0	0	0	0	0	0.11	0	0	0	0.04	0.04	0.03	0	0.04	0.04	0	0	0.06	0.11	0	0	0	0	0	0.04	0.09	0	0	0	0	0	0	0	0	0	3	0	0	0	1	1	1	0	1	1
LOC105223354	0	0.01	0	0	0	0	0	0	0	0	0.61	0	0.7	0	0	1.04	0	0.01	0.3	0.01	0	0	0	0	1	1.74	0	0	0	0.02	0	1	0	0	0	0	0	0	0	0	51	0	46	0	0	93	0	1	24
LOC105223355	2.43	3.27	4.17	3.14	3.19	0.42	7.71	0.46	0.53	0.17	2.85	6.18	4.05	3.19	2.93	0.4	0.51	0.24	0.27	0.39	2.11	2.81	4.73	3.6	6.61	0.87	0.1	0.89	0.26	1.02	41	72	77	32	58	11	196	11	12	4	66	143	74	61	62	10	14	5	6
LOC105223356	0	0	0	0	0	0	0	0.03	0.04	0	2.97	0	2.94	0	0	4.46	0	0.11	1.16	0	0	0	0	0	3.18	4.16	0	0	0.03	0	0	0	0	0	0	0	0	1	1	0	86	0	67	0	0	138	0	3	32
LOC105223357	108.41	204.52	114.05	255.48	272.07	258.96	194.07	130.43	180.36	163.98	189.48	330.75	283.56	196.31	309.11	171.68	58.55	58.78	130.33	183.62	282.75	324.66	279.63	219.2	314.39	98.94	235.14	155.24	208.99	89.6	774	1903	890	1101	2089	2899	2083	1328	1741	1606	1856	3232	2189	1584	2764	1799	673	527	1213
LOC105223358	248.74	414.59	200.64	456.41	513.33	524.41	406.78	248.39	344.26	345.03	351.66	671.92	436.55	250.52	545.52	342.15	169.53	152.12	284.61	503.64	375.65	558.01	444.61	382.03	605.74	299.79	647.95	257.69	348.94	184.34	2120	4605	1869	2348	4705	7008	5212	3019	3967	4034	4112	7838	4023	2413	5823	4280	2326	1628	3162
LOC105223359	3.73	3.33	4.22	3.45	3.72	2.52	2.19	3.23	3.21	2.36	3.52	3.09	4.11	3.25	2.54	2.88	3.37	3.1	2.69	2.91	2.22	3.22	4.13	3.87	3.8	2.83	3.11	2.42	1.96	2.08	68	79	84	38	73	72	60	84	79	59	88	77	81	67	58	77	99	71	64
LOC105223360	0	0	0	0	0	0	0	0	0	0	0	0	0	0	0	0	0	0	0	0	0	0	0	0	0	0	0	0	0	0	0	0	0	0	0	0	0	0	0	0	0	0	0	0	0	0	0	0	0
LOC105223361	0	0	0	0	0	0	0	0	0.12	0	0	0	0	0	0	0	0	0	0	0	0	0	0	0	0	0	0	0	0	0	0	0	0	0	0	0	0	0	2	0	0	0	0	0	0	0	0	0	0
LOC105223362	0	0	0	0	0	0	0	0	0	0	0	0	0	0	0	0	0	0	0	0	0	0	0	0	0	0	0.13	0	0	0	0	0	0	0	0	0	0	0	0	0	0	0	0	0	0	0	0	0	0
LOC105223363	0	0	0.04	0	0	0	0.03	0	0	0	26.29	0.03	23.83	0	0	15.83	0	0.04	5.57	0.03	0.16	0.06	0	0	34.35	27.61	0	0	0	0	0	0	1	0	0	0	1	0	0	0	795	1	568	0	0	512	0	1	160
LOC105223364	3.85	4.14	4.85	4.31	3.85	2.46	3.59	2.9	3.49	1.82	3.93	4.78	4.81	3.75	4.77	2.49	3.23	2.45	2.81	3.15	4.58	4.82	4.66	5.16	3.76	1.71	2.04	3.87	4.15	3.82	40	56	55	27	43	40	56	43	49	26	56	68	54	44	62	38	54	32	38
LOC105223365	0.87	0.8	0.68	1.09	0.49	0.81	0.76	0.18	0.29	0.57	25.06	0.89	19.47	1.01	0.91	33.01	0.65	0.77	11.9	0.67	0.36	1.09	0.84	0.59	21.22	37.02	0.26	0.34	0.64	0.78	20	24	17	15	12	29	26	6	9	18	787	28	482	26	26	1109	24	22	355
LOC105223366	0	0	0.04	0	0	0	0	0.1	0	0.03	4.69	0	1.62	0.08	0	4.51	0	0	1.27	0.03	0	0	0	0.04	1.96	6.78	0	0	0	0.03	0	0	1	0	0	0	0	3	0	1	136	0	37	2	0	140	0	0	35
LOC105223367	0.25	0.53	1.04	0.62	0.64	0.6	0.63	0.79	1.02	0.41	0.73	0.6	1.1	1.28	0.95	0.86	0.62	1	0.72	0.96	1.2	1.1	1.27	0.79	0.77	1.16	0.27	0.79	1.29	0.69	4	11	18	6	11	15	15	18	22	9	16	13	19	23	19	20	16	20	15
LOC105223368	0	0.05	0.06	0.23	0	0	0	0	0	0.05	10.74	0.1	9.19	0.25	0	14.3	0	0	4.48	0	0	0	0	0	11.33	15.79	0.06	0	0.05	0.04	0	1	1	2	0	0	0	0	0	1	212	2	143	4	0	302	0	0	84
LOC105223369	1324.63	1096.93	1128.75	1034.4	1099.15	779.29	921.75	938.55	1013.36	861.52	1152.1	1339.21	1229	1183.72	1369.62	909.55	986.2	877.4	938.57	912.94	1137.55	1285.28	1132.92	1376.46	1047.1	852.76	922.39	825.93	873.1	1004.84	19181	20700	17864	9041	17116	17693	20065	19381	19839	17113	22888	26541	19242	19371	24838	19330	22989	15953	17716
LOC105223370	0.87	0.55	0.44	0.48	0.27	0.37	0.32	0.51	0.39	0.56	0.35	0.91	0.44	0.3	0.35	0.56	0.42	0.61	1.18	0.8	0.4	0.18	0.16	0.64	0.05	0.7	0.53	0.38	0.32	0.44	18	15	10	6	6	12	10	15	11	16	10	26	10	7	9	17	14	16	32
LOC105223371	0	0	0	0	0	0	0	0	0	0	0	0	0	0	0	0.1	0	0	0	0	0	0	0	0	0	0	0	0	0	0	0	0	0	0	0	0	0	0	0	0	0	0	0	0	0	1	0	0	0
LOC105223372	3.79	1.02	3	0.85	1.62	2.22	0.95	1.87	0.91	1.34	1.72	2.02	1.42	2.26	1.8	2.3	2.03	1.79	2.12	1.64	2.8	1.15	1.15	2.47	1.26	2.29	2.34	1.94	1.57	2.35	37	13	32	5	17	34	14	26	12	18	23	27	15	25	22	33	32	22	27
LOC105223373	194.33	207.98	259.77	213.04	241.68	159.83	144.15	162.48	155.22	169.7	206.38	191.44	231.13	186.95	249.9	136.85	180.95	231.43	195.09	172.59	194.28	223.33	277.73	260.94	312.69	139.02	163.1	157.6	105.62	188.46	3577	4989	5226	2367	4784	4613	3989	4265	3863	4285	5212	4823	4600	3889	5761	3697	5362	5349	4681
LOC105223374	4.46	3.55	5.68	4.3	6.32	5.99	3.8	5.33	5.41	5.12	3.87	5.47	4.65	5.72	4.14	4.12	4.75	4.26	4.97	4.49	2.92	5.05	7.48	5.66	5.29	2.76	3.9	3.93	5.19	3.23	72.45	75.21	100.96	42.16	110.47	152.54	92.97	123.65	118.78	114.23	86.19	121.78	81.79	105.07	84.23	98.31	124.18	87.01	105.37
LOC105223375	1.27	1.13	1.03	0.94	1.08	0.99	0.88	0.97	1	0.97	1.3	1.07	1.54	1.32	1.01	1.75	1.23	1.66	1.02	1.19	0.94	1.55	1.08	1.67	1.83	1.02	1	1	1.26	0.81	45	52	40	20	41	55	47	49	48	47	63	52	59	53	45	91	70	74	47
LOC105223376	20.16	14.8	15.36	15.33	17.28	14.71	15.86	16.33	15.37	17.95	17.66	19.77	17.92	16.03	19.47	15.34	17.73	17.74	16.6	18.8	15.66	17.85	18	20.54	19.62	15.53	19.32	16.38	15.58	15.11	257	246	214	118	237	294	304	297	265	314	309	345	247	231	311	287	364	284	276
LOC105223377	8.91	7.69	8.28	6.74	8.34	5.8	5.64	5.87	5.88	5.36	7.34	7.85	6.87	7.7	6.82	5.74	6.57	6.37	5.85	6.12	6.4	7.57	8.33	6.71	7.73	5.19	5.27	5.77	5.37	6.15	331	372	336	151	333	338	315	311	295	273	374	399	276	323	317	313	393	297	283
LOC105223378	0	0.04	0.07	0.03	0	0.07	0.02	0.01	0.07	0.05	0.06	0.03	0.01	0	0.09	0.06	0.08	0	0.01	0.09	0.02	0.06	0	0.03	0	0.05	0.05	0.04	0.13	0.05	0	3	5	1	0	7	2	1	6	4	5	3	1	0	7	6	8	0	1
LOC105223379	1.8	2.22	4.23	2.73	3.35	2.85	3.44	3.63	2.84	2.97	1.66	2.35	1.23	1.04	2.25	2.46	4.48	4.31	4.09	3.53	1.4	1.96	3.7	2.45	2.45	2.29	2.39	2.35	3.66	3.34	23	37	59	21	46	57	66	66	49	52	29	41	17	15	36	46	92	69	68
LOC105223381	2.26	1.81	2.43	3.21	2.05	5.32	5.12	4.98	4.79	5.01	2.14	2.85	2.57	2.35	2.3	5.67	4.78	5	5.45	4.69	1.77	3.38	2.85	2.2	2.55	5.39	4.69	4.89	3.99	4.66	91	95	107	78	89	336	310	286	261	277	118	157	112	107	116	335	310	253	286
LOC105223382	3.04	2.27	2.3	1.66	2.71	2.66	2.49	2.08	2.23	2.01	2.42	2.34	2.35	2.18	2.35	3.23	2.35	1.77	2.55	2.17	2.76	2.28	2.19	2.14	2.54	2.17	2.03	1.94	2.72	1.86	135	132	114	46	130	189	168	136	137	124	147	147	114	106	133	212	166	98	150
LOC105223383	93.08	90.98	95.11	89.54	94.65	78.88	79.19	76.73	77.6	78.41	95.59	102.44	94.71	89.05	94.25	75.1	73.65	77.65	74.93	68.92	100.8	92.86	99.78	100.6	99.07	72.01	70.99	82.36	80.05	71.33	2108	2685	2354	1224	2305	2801	2696	2478	2376	2436	2970	3175	2319	2279	2673	2496	2685	2208	2212
LOC105223384	10.14	12.97	9.65	10.3	10.18	11.38	9.71	13.18	10	12.62	11.23	8.99	10.75	9.21	9.5	10.78	8.99	5.81	9.96	9.72	11.41	11.33	9.28	10.15	11.02	8.64	12.48	12.68	11.55	9.26	75	125	78	46	81	132	108	139	100	128	114	91	86	77	88	117	107	54	96
LOC105223385	0.04	0	0	0	0.04	0	0	0	0	0	0	0	0.04	0	0	0.03	0	0.03	0	0.18	0	0	0	0	0.05	0	0	0	0	0	1	0	0	0	1	0	0	0	0	0	0	0	1	0	0	1	0	1	0
LOC105223386	0.08	0	0	0	0	0.05	0	0	0	0	0	0	0	0	0	0	0	0	0	0	0	0	0	0	0	0	0	0	0	0	1	0	0	0	0	1	0	0	0	0	0	0	0	0	0	0	0	0	0
LOC105223387	0	0	0	0	0	0	0	0	0	0.05	0	0	0	0.06	0	0	0	0	0	0	0	0	0	0	0	0	0	0	0	0	0	0	0	0	0	0	0	0	0	1	0	0	0	1	0	0	0	0	0
LOC105223388	0.39	0	0.06	0	0	0	0	0	0	0	0	0	0	0	0	0	0	0	0	0	0	0	0.07	0.06	0	0	0	0	0	0	6	0	1	0	0	0	0	0	0	0	0	0	0	0	0	0	0	0	0
LOC105223389	15.07	9.78	12.42	11.77	12.27	11.81	11.18	8.9	13.3	12.46	10.15	11.52	13.17	10.3	9.24	12.9	15.63	11.52	14.41	10.97	9.43	12.53	12.84	11.6	9.71	14.51	13.86	12.35	10.91	11.19	475	402	428	224	416	584	530	400	567	539	439	497	449	367	365	597	793	456	592
LOC105223391	10.33	8.74	7.86	6.89	8.01	7.79	8.01	8.06	7.1	8.03	8.14	7.29	8.47	7.6	8.4	7.47	7.19	8.16	7.47	7.39	9.47	8.67	8.23	6.51	9.56	6.97	5.98	8.49	6.97	7.35	380	419	316	153	317	449	443	423	353	405	411	367	337	316	387	403	426	377	358
LOC105223392	6.69	7.62	4.85	6.93	7.21	5.91	5.97	4.58	5.49	5.04	7.44	5.46	8.98	5.33	4.63	6.77	3.98	6.57	6.25	5.55	4.84	8.16	5.02	7.73	7.91	7.48	4.96	6.07	5.95	5.01	120	178	95	75	139	166	161	117	133	124	183	134	174	108	104	178	115	148	146
LOC105223393	11.06	8.61	9.06	8.58	9.06	9.27	9.88	9.27	9.1	8.74	10.03	10.4	8.66	9.31	8.65	7.38	8.12	8.44	6.53	8.37	8.83	9.38	9.05	8.5	9.85	9.12	9.56	11.1	8.47	7.88	143	145	128	67	126	188	192	171	159	155	178	184	121	136	140	140	169	137	110
LOC105223394	1.92	3.05	3.33	2.55	3.22	3.6	3.53	2.52	3.32	2.81	3.09	2.59	2.85	2.16	1.88	3.18	3.43	2.49	3.35	3.04	2.03	2.03	3.75	2.71	3.87	3	3.04	3.37	2.53	2.78	45	93	85	36	81	132	124	84	105	90	99	83	72	57	55	109	129	73	102
LOC105223395	87.05	89.13	78.63	85.25	77.24	158.52	163.38	197.76	193.13	159.41	71.91	65.73	68.02	82.35	74.09	211.93	224.54	222.76	217.51	215.37	56.73	56.7	60	76.77	58.13	193.17	199.11	221.78	204.14	217.72	1424	1904	1416	837	1358	4051	4002	4616	4279	3589	1626	1477	1220	1523	1523	5109	5895	4578	4653
LOC105223396	10.02	8.34	8.23	9.39	6.89	7.05	8.23	9.33	7.7	7.45	8.75	8.04	8.73	7.94	9.26	8.71	9.96	9.25	9.23	8.08	6.93	6.79	9.37	8.79	8.33	6.16	8.93	7.93	6.89	8.71	204	220	182	117	150	225	252	272	214	210	244	224	191	182	238	259	329	237	244
LOC105223397	0.03	0	0	0.04	0.02	0.02	0.02	0	0.02	0.02	0	0	0.05	0	0.06	0	0	0.04	0	0.02	0	0.03	0.03	0	0	0.02	0.04	0	0	0	1	0	0	1	1	1	1	0	1	1	0	0	2	0	3	0	0	2	0
LOC105223398	0	0	0	0	0	0	0	0	0.05	0	0	0	0	0	0	0	0	0	0	0	0	0	0	0	0	0	0	0	0	0	0	0	0	0	0	0	0	0	1	0	0	0	0	0	0	0	0	0	0
LOC105223399	0	0.06	0	0	0	0.03	0.08	0.03	0	0	0	0	0.08	0	0	0.09	0.08	0	0.16	0.21	0	0	0	0.04	0.05	0.1	0.11	0.13	0	0.05	0	2	0	0	0	1	3	1	0	0	0	0	2	0	0	3	3	0	5
LOC105223400	0.12	0	0	0	0	0	0	0.08	0.09	0	0.09	0.35	0.11	0	0	0.08	0.07	0.38	0.18	0	0	0	0	0.11	0.27	1.1	0	0.09	0	0	1	0	0	0	0	0	0	1	1	0	1	4	1	0	0	1	1	4	2
LOC105223401	1.76	1.02	1.35	1.07	1.21	0.61	0.67	1.07	1	0.84	0.84	1.03	0.92	0.97	0.85	0.69	0.96	1	0.97	0.76	1.01	0.9	1.42	1.14	1.09	1.07	0.81	0.72	0.62	0.77	98	74	82	36	72	53	56	85	75	64	64	78	55	61	59	56	86	70	70
LOC105223402	0.3	1.02	0.63	0.73	0.55	0.35	0.62	0.35	0.44	0.25	7.79	0.72	7.83	0.44	0.63	8.09	0.37	0.47	2.8	0.39	0.47	0.31	0.33	0.7	7.87	9.3	0.29	0.16	0.32	0.6	6	27	14	9	12	11	19	10	12	7	217	20	172	10	16	241	12	12	74
LOC105223403	12.8	11.69	10.73	10.5	12.33	8.12	11.26	12.02	12.22	10.45	8.6	10.23	11.22	9.18	10.99	13.99	14.32	15.43	16.69	13.1	8.63	14.03	9.78	14.83	12.79	11.47	13.81	10.51	9.35	13.8	321	382	294	159	332	319	424	430	414	359	296	351	304	260	345	515	578	486	545
LOC105223404	12.18	13.28	17.18	12.88	16.02	15.63	16.09	15.11	14.42	15.61	12.78	12.69	14.44	14.07	13.64	16.32	15.64	15.31	16.14	16.61	11.92	16.86	13.43	12.86	13.23	16.76	14.74	16.1	16.24	16.58	199	283	308	127	283	402	396	357	318	349	287	285	254	262	279	396	412	312	347
LOC105223405	12.95	12.03	13.4	11.1	13.21	12.65	12.48	11.31	11.43	12.4	11.59	12.5	10.45	10	10.16	14.36	16.26	12.13	12.92	11.58	11.36	11.22	11.91	10.26	10.52	13.9	14.6	11.94	12.36	13.08	290	351	328	150	318	444	420	361	346	381	356	383	253	253	285	472	586	341	377
LOC105223406	0	0	0	0	0	0	0	0	0	0	0	0	0	0	0	0	0	0	0	0	0	0	0	0	0	0	0	0	0	0	0	0	0	0	0	0	0	0	0	0	0	0	0	0	0	0	0	0	0
LOC105223407	9.44	10.05	11.67	8.73	11.78	10.79	12.57	14.74	11.83	10.66	9.17	7.09	9.75	9.4	8.64	11.42	10.43	9.42	10.57	9.82	10.21	8.72	9.19	9.46	8.08	9.97	8.43	12.07	12.73	9.2	111	154	150	62	149	199	222	247	188	172	148	114	124	125	127	197	198	139	162
LOC105223408	434.71	426.57	472.03	495.1	453.83	550.72	492.4	495.17	485.91	524.92	400.34	372.08	365.6	437.89	421.64	483.66	476.94	507.39	436.92	474.47	467.5	415.5	399.13	415.82	347.64	436.1	472.28	611.11	569.64	521.23	2934	3752	3482	2017	3294	5828	4996	4766	4434	4860	3707	3437	2668	3340	3564	4791	5182	4300	3844
LOC105223409	13.7	13.45	12.64	13.03	16.09	12.75	13.3	11.89	13.54	11.79	14.41	12.64	14.13	13.22	13.45	14.24	10.54	10.29	11.37	11.01	9.62	12.64	17.44	11.65	16.31	11.42	10.08	11.25	12.8	9.76	122	156	123	70	154	178	178	151	163	144	176	154	136	133	150	186	151	115	132
LOC105223410	13.44	12.75	13.48	13.07	10.84	12.61	13.33	13.58	13.65	14.56	12.46	12.66	11.79	12.12	12.14	12.14	12.64	13.71	13.05	12.63	13.72	12.13	11.85	10.75	13.08	12.22	12.21	13.21	12.93	12.67	467	577	512	274	405	687	696	673	641	694	594	602	443	476	528	619	707	598	591
LOC105223411	52.28	52.65	41.66	46.08	44.75	50.94	54.25	56.09	42.77	41.13	43.51	45.23	41.42	45.35	33.78	40.62	35.46	44.93	42.94	38.82	54.8	39.56	47.18	43.41	45.99	39.42	47.24	43.38	41.3	42.28	2385	3094	2078	1240	2178	3682	3786	3695	2641	2635	2731	2819	2025	2320	1918	2726	2693	2635	2593
LOC105223412	0	0.07	0	0	0	0	0.06	0	0.14	0.02	0	0.02	0	0	0	0	0.04	0.05	0.02	0	0.07	0	0	0	0	0	0.08	0.02	0	0.05	0	3	0	0	0	0	3	0	6	1	0	1	0	0	0	0	2	2	1
LOC105223413	3.7	4.91	4.99	3.93	4.15	1.17	1.12	1.31	1.27	1.27	4.83	5.37	5.21	5.98	6.3	1.16	0.81	1.19	1.13	1.05	5.74	4.43	5.02	6.65	5.89	1.27	1.02	1.26	0.88	0.94	250	432	368	160	301	124	114	126	116	118	447	496	380	456	532	115	88	101	100
LOC105223414	0	0	0	0	0	0	0	0	0	0	0	0	0	0	0	0	0	0	0	0	0	0	0	0	0	0	0	0	0	0	0	0	0	0	0	0	0	0	0	0	0	0	0	0	0	0	0	0	0
LOC105223415	0	0	0	0	0	0	0	0	0	0	0	0	0	0	0	0	0	0	0	0	0	0	0	0	0	0	0	0	0	0	0	0	0	0	0	0	0	0	0	0	0	0	0	0	0	0	0	0	0
LOC105223416	4.84	5.26	4.91	4.05	4.34	4.48	5.25	4.76	5.21	4.76	5.66	4.93	5.5	4.31	5.15	4.49	3.94	3.93	4.74	4.51	6.2	4.65	5.21	4.52	4.78	5.76	5.09	4.25	4.49	5	224	317	248	113	216	325	365	314	326	302	359	312	275	225	298	305	293	228	286
LOC105223417	0.05	0.04	0	0	0.19	0.03	0.13	0.04	0.04	0	0	0.11	0.05	0.18	0	0.1	0.06	0	0	0	0	0	0.06	0	0.11	0	0.04	0	0	0.03	1	1	0	0	4	1	4	1	1	0	0	3	1	4	0	3	2	0	0
LOC105223418	4.48	3.41	3.65	2.76	3.91	4.18	4.56	3.29	3.66	3.49	4.3	3.84	4.43	3.94	4.1	4.4	3.51	3.4	2.87	3.41	4.19	3.48	4.59	3.73	4.8	4.14	3.82	4.07	4.02	3.45	145	144	129	54	136	212	222	152	160	155	191	170	155	144	166	209	183	138	121
LOC105223419	0	0	0	0	0	0	0	0	0	0	7.94	0	9.67	0	0	8.67	0.05	0	2.08	0	0.09	0	0	0	7.59	9.24	0	0	0.05	0	0	0	0	0	0	0	0	0	0	0	149	0	143	0	0	174	1	0	37
LOC105223420	17.17	11.87	13.97	16.2	9.68	9.37	9.48	9.69	6.22	9.04	12.55	10.87	9.31	11.02	9.51	7.92	11.63	5.35	7.24	4.59	11.62	11.19	10.18	13.48	11.84	8.99	5.06	4.6	4.51	3.92	353	318	314	201	214	302	293	284	173	255	354	306	207	256	245	239	385	138	194
LOC105223421	74.95	74.54	81.82	80.47	86.15	87.88	78.53	76.39	79.31	88.17	81.67	85.32	76.26	73.72	89.47	77.88	69.14	75.49	69.59	81.77	78.65	87.4	88.4	73.12	87.65	77.48	78.71	77.77	85.91	66.31	699	906	834	453	864	1285	1101	1016	1000	1128	1045	1089	769	777	1045	1066	1038	884	846
LOC105223422	0.04	0.06	0.14	0.13	0.04	0.02	0	0	0	0	13.63	0.06	14.65	0.1	0	11.87	0	0.06	3.84	0	0.05	0	0.04	0.03	10.7	19.38	0.13	0.09	0	0.07	1	2	4	2	1	1	0	0	0	0	496	2	419	3	0	462	0	2	132
LOC105223423	12.37	11.27	9.24	10.38	10.71	8.84	7.49	8.35	9.51	9.39	14.39	10.23	14.73	10.58	9.71	15	10.07	10.35	13.09	11.12	10.63	11.44	9.71	12	18.1	19.44	10.74	8.37	7.76	11.46	480	570	392	243	447	538	437	462	499	500	766	543	618	464	472	854	629	504	662
LOC105223425	1.9	1.99	2.3	2.08	1.89	2.51	1.91	1.92	1.51	2.15	2.54	2.14	2.53	2.34	2.49	1.73	1.42	1.49	2.12	2.35	1.72	2.06	1.79	2.64	2.18	1.61	2.34	1.3	1.45	2.05	68	93	90	45	73	141	103	98	73	106	125	105	98	95	112	91	82	67	99
LOC105223426	7.69	7.12	7.42	6.87	6.53	5.16	4.18	5.9	5.93	5.79	7.28	7.07	6.57	6.68	5.68	6.03	7.38	6.33	7.32	6.09	6.33	8.46	6.12	7.79	6.93	6.63	6.81	5.28	3.75	6.32	783	944	825	422	715	823	640	857	816	809	1017	985	723	768	724	901	1209	809	971
LOC105223427	0	0	0	0	0	0	0	0	0	0	0	0	0	0	0	0	0	0	0	0	0	0	0	0	0	0	0	0	0	0	0	0	0	0	0	0	0	0	0	0	0	0	0	0	0	0	0	0	0
LOC105223428	0	0	0	0	0	0	0	0	0	0	0	0	0	0	0	0	0	0	0	0.12	0	0	0	0	0	0	0	0	0	0	0	0	0	0	0	0	0	0	0	0	0	0	0	0	0	0	0	0	0
LOC105223429	0	0	0	0	0	0	0	0	0	0	0	0	0	0	0	0	0	0	0	0	0	0	0	0	0	0	0	0	0	0	0	0	0	0	0	0	0	0	0	0	0	0	0	0	0	0	0	0	0
LOC105223430	0	0	0	0	0	0	0	0.06	0	0	0	0	0	0	0	0	0	0	0	0	0	0	0	0	0	0	0	0	0	0.05	0	0	0	0	0	0	0	1	0	0	0	0	0	0	0	0	0	0	0
LOC105223431	0	0	0	0	0	0	0	0	0	0	0	0	0	0	0	0	0	0	0	0	0	0	0	0	0	0	0	0	0	0	0	0	0	0	0	0	0	0	0	0	0	0	0	0	0	0	0	0	0
LOC105223432	0	0	0	0	0	0	0	0	0	0	0	0	0	0	0	0	0	0	0	0	0	0	0	0	0	0	0	0	0	0	0	0	0	0	0	0	0	0	0	0	0	0	0	0	0	0	0	0	0
LOC105223433	0	0	0	0	0	0	0	0	0	0	0	0	0	0	0	0	0	0	0	0	0	0	0	0	0	0	0	0	0	0	0	0	0	0	0	0	0	0	0	0	0	0	0	0	0	0	0	0	0
LOC105223434	0.04	0.03	0	0	0	0	0.06	0.05	0.01	0	0	0	0	0.02	0	0.14	0.02	0	0.09	0.05	0	0	0.04	0	0	0.06	0.05	0.04	0.01	0.09	2	2	0	0	0	0	5	4	1	0	0	0	0	1	0	11	2	0	6
LOC105223435	0.14	0.55	0.39	0	0.26	0.18	0.47	0.4	0	0.1	0.1	0.21	0	0.38	0.11	0.39	0.97	0	0.22	0.41	0	0.53	0	0.64	0.16	0.11	0	0.45	0.42	0.16	1	5	3	0	2	2	5	4	0	1	1	2	0	3	1	4	11	0	2
LOC105223436	0.49	0.53	0.49	0.41	0.37	0.41	0.23	0.34	0.25	0.18	0.36	0.61	0.5	0.26	0.63	0.37	0.4	0.31	0.6	0.39	0.18	0.18	0.22	0.22	0.38	0.19	0.46	0.23	0.22	0.28	10	14	11	5	8	13	7	10	7	5	10	17	11	6	16	11	13	8	16
LOC105223437	0	0	0	0	0	0	0	0	0	0	0	0	0.06	0	0	0	0	0	0	0	0	0	0	0	0	0.11	0	0	0	0	0	0	0	0	0	0	0	0	0	0	0	0	1	0	0	0	0	0	0
LOC105223438	0	0	0	0	0.07	0	0	0	0.06	0	0.06	0	0	0	0.06	0	0.05	0	0	0	0	0	0	0	0	0	0	0	0	0	0	0	0	0	1	0	0	0	1	0	1	0	0	0	1	0	1	0	0
LOC105223439	6.25	5.2	4.29	4.89	2.75	3.43	1.39	3.9	1.54	3.29	5.19	2.54	3.05	2.31	3.61	1.54	5.72	1.66	2.27	0.63	3.72	5.65	4.1	2.79	4.07	2.81	1.76	2.74	1.4	1.7	36	39	27	17	17	31	12	32	12	26	41	20	19	15	26	13	53	12	17
LOC105223440	0	0	0.19	0	0	0	0	0	0	0	0	0	0	0	0	0	0	0	0	0	0	0	0	0	0	0	0	0	0	0	0	0	1	0	0	0	0	0	0	0	0	0	0	0	0	0	0	0	0
LOC105223441	5.47	5.14	4.88	5.65	5.86	4.88	5.65	5.18	4.92	5.68	4.46	3.8	4.41	5.07	4.05	4.62	4.43	5.23	4.97	4.32	4.73	4.76	3.59	4.3	3.32	4.68	5.41	4.66	5.3	6.72	125	153	122	78	144	175	194	169	152	178	140	119	109	131	116	155	163	150	148
LOC105223442	7.52	7.83	11.42	11.1	11.95	22	18.7	18.98	14.86	25.88	9.47	9.36	11.72	8.31	11.75	19.38	24.97	25.26	22.41	23.77	12.08	8.66	12.25	8.92	10.13	21.83	18.02	21.38	19.24	23.44	165	224	274	147	282	757	617	594	441	779	285	281	278	206	323	624	882	696	641
LOC105223443	0	0	0	0	0	0	0	0	0.03	0	0	0	0	0	0	0	0	0	0.03	0	0	0	0	0.04	0	0	0	0.06	0.06	0.02	0	0	0	0	0	0	0	0	1	0	0	0	0	0	0	0	0	0	1
LOC105223444	0.12	0.09	0	0	0.07	0	0.13	0.06	0	0	0	0.06	0.55	0.04	0.1	0.57	0.02	0.03	0.06	0	0	0	0.09	0.04	0.58	0.55	0	0.09	0	0.05	3	3	0	0	2	0	5	2	0	0	0	2	15	1	3	21	1	1	2
LOC105223445	85.06	80.39	84.71	72.25	84.81	94.97	99.74	94.43	99.16	92.98	84.63	86.79	87.81	84.43	84.77	102.3	97.51	98.36	97.62	102.38	84.33	90.8	87.78	90.37	91.14	100.97	89.32	94.42	93.47	90.96	3699	4567	4032	1900	3982	6495	6526	5856	5832	5551	5045	5170	4135	4151	4633	6529	6862	5381	5539
LOC105223446	21.23	25.92	19.91	21.14	20.13	19.81	16.91	19.88	18.34	23.26	19.67	20.63	21.38	20.73	24.14	19.38	21.05	27.07	23.43	24.99	18.78	23.15	21.65	25.43	25.7	20.63	21.16	14.1	15.97	22.57	203	323	208	122	207	297	243	271	237	305	258	270	221	224	289	272	324	325	292
LOC105223447	48.51	44.52	44.38	52.07	44.74	37	36.78	40.82	33.01	34.37	43.7	41.25	47.02	48.24	54.07	40.45	33.26	40.33	30.36	29.88	37.6	41.72	48.88	40.93	43.12	35.12	29.24	33.04	38.69	27.35	250	299	250	162	248	299	285	300	230	243	309	291	262	281	349	306	276	261	204
LOC105223448	23.94	21.57	22.81	23.75	20.4	29.24	27.8	27.99	26.27	26.64	17.93	20.37	18.72	18.05	20.56	26.37	33.76	28.55	27.75	28.06	20.86	22.02	20.99	19.88	19.93	25.75	26.44	30.48	23.52	26.74	730	857	760	437	669	1398	1274	1217	1083	1114	750	850	617	622	785	1180	1657	1093	1103
LOC105223449	12.32	11.84	11.09	10.55	11.19	9.75	8.64	10.01	9.35	9.39	11.89	11.62	13.33	9.9	10.03	11.35	10.72	10.37	11.55	9.96	9.57	12.14	11.97	12.26	12.5	10.66	11.17	8.48	9.72	8.98	424	531	417	219	414	526	447	491	435	443	561	547	496	385	432	573	594	448	518
LOC105223450	16.06	14.58	17.42	14.47	15.31	12.48	11.91	13.1	12.27	11.38	15.58	15.68	14.22	15.53	16.17	11.24	12.25	11.6	12.72	12.83	14.26	16.36	15.89	15.72	16.36	11.84	14.11	12.5	12.17	11.39	399	472	473	217	409	486	445	464	412	388	531	533	382	436	503	410	490	362	412
LOC105223451	27.43	29.17	25.9	26.16	26.5	27.52	30.15	26.04	30.22	26.13	27.92	28.5	28.64	27.37	26.07	30.69	24.56	29.12	27.14	27.72	31.93	27.97	28.03	24.66	25.02	26.5	26.15	30.08	29.76	25.65	721	999	744	415	749	1134	1191	976	1074	942	1007	1025	814	813	858	1184	1039	961	930
LOC105223452	6.42	5.18	6.75	3.38	5.19	3.33	4.11	4.48	4.27	3.75	5.79	6.18	6.64	4.84	5.24	3.87	4.7	4.44	4.8	4.45	5.72	6.5	5.97	5.71	5.59	4.34	4.56	3.02	3.66	4.13	236	248	271	75	205	192	227	235	212	189	292	311	264	201	241	209	278	205	230
LOC105223453	84.41	71.87	91.16	74.96	81.82	78.8	92.18	84.42	68.29	70.57	74.79	61.44	78.18	73.93	65.86	60.4	58.75	64.48	58.36	56.2	81.96	78.85	66.2	64.07	71.28	51.17	58.79	63.36	65.67	62.77	1508	1680	1769	813	1577	2225	2479	2165	1657	1727	1830	1500	1513	1501	1485	1597	1695	1456	1368
LOC105223454	1.8	2.37	0.95	3.03	0.57	0.69	0.65	1.89	0.4	1.6	2.09	3.04	1.56	1.56	2.32	4.75	0.76	1	2.01	0.47	0.51	2.56	1.74	1.54	0.48	2.71	4.29	0.96	1.97	1.05	50	86	29	51	17	30	27	75	15	61	80	116	47	49	81	194	34	35	73
LOC105223455	13.66	14.55	13.44	12.71	15.45	17.01	18.08	16.78	17.62	16.83	14.43	13.69	14.16	14.22	12.6	15.31	15.09	16.67	15.55	16.21	14.11	13.2	13.56	12.57	11.34	15.34	15.93	15.32	17.29	16.01	374	519	402	210	455	730	744	655	652	632	542	513	419	440	432	615	665	573	555
LOC105223456	2.09	2.37	2.44	1.86	3.01	1.91	1.32	2.08	2.42	2.24	2.02	2.35	2.33	2.54	2.46	1.97	2.14	2.28	2.71	2.6	2.29	3.36	2.4	3.13	2.58	1.6	2.4	1.44	1.46	2.64	179	265	228	96	277	256	170	254	280	263	237	275	216	246	264	247	295	245	302
LOC105223457	13.82	15.6	12.64	12.01	10.24	11.07	13.74	12.23	12.63	11.94	12.08	13.45	10.91	14.26	12.2	10.29	10.52	10.56	8.98	9.37	16.97	12.39	12.24	13.17	10.3	8.49	12.12	9.84	13.34	13.97	301	443	301	158	240	378	450	380	372	357	361	401	257	351	333	329	369	289	255
LOC105223458	0.33	0.9	0.15	0.55	0.47	1.6	0.28	1.93	0.74	0.79	0.79	1.16	0	0.3	0.6	1.93	1.09	1.99	1.22	1.45	1.19	0.52	0.84	0.6	0.93	1.41	1.41	2.83	2.13	0.48	4	14	2	4	6	30	5	33	12	13	13	19	0	4	9	34	21	30	19
LOC105223459	15.28	12.13	12.69	14.19	14.91	15.34	17.91	16.37	14.53	14.58	14.45	13.54	13.1	14.35	12.27	14.05	16.08	16.63	14.46	15.23	14.71	12.68	14.35	12.08	11.82	15.38	15.74	14.98	17.26	15.05	521	539	473	292	547	820	918	796	670	682	676	632	483	553	524	703	883	712	643
LOC105223460	0.16	0	0	0	0	0	0	0.08	0	0.04	0.08	0	0	0	0	0	0	0	0	0	0	0	0	0	0	0.08	0.05	0.09	0	0	3	0	0	0	0	0	0	2	0	1	2	0	0	0	0	0	0	0	0
LOC105223461	1046.17	1139.66	1092.77	1142.21	1102.19	1234.56	1170.81	1219.15	1144.07	1191.34	1086.34	1032.11	981.06	1138.69	1053.77	1117.6	1179.32	1154.52	1074.69	1132.29	1193.91	1008.4	1054.21	1078.04	1017.43	1052.34	1157	1335.12	1249.67	1240.35	8134.6	11548.5	9286.83	5360.83	9216.37	15051.4	13685.8	13518.6	12027.3	12707.3	11588.8	10983.7	8248.01	10006.1	10261.7	12754.1	14762	11272	10892.8
LOC105223462	1.17	1.57	1.5	3.11	1.53	1.95	1.72	3.95	2.08	1.2	1.54	1.54	2.17	2.49	2.62	1.76	2.25	2.43	0.72	1.36	1.12	1.47	2.11	2.73	1.89	3.43	1.39	0.74	1.71	2.02	5	8.71	7	8	7	13	11	23.98	12	7	9	9	10	12	14	11	15.42	13	4
LOC105223463	1.18	0.96	0.75	0.94	1.17	0.82	0.62	0.8	0.96	0.86	1.08	0.73	0.73	0.85	0.7	1.25	1.28	1.23	1.42	1.35	0.8	0.92	0.48	1.08	0.85	0.67	1.18	0.64	0.85	1.47	92	97	64	44	98	100	72	89	101	92	115	78	61	75	68	143	160	120	144
LOC105223466	2.32	3.01	2.23	2.16	3.15	2.04	1.62	1.33	2.28	1.9	1.86	2.6	3.46	2.47	2.42	1.7	1.22	2.27	1.78	1.51	3.88	1.71	2.47	2.6	2.45	2.1	1.06	1.26	1.17	1.33	39	66	41	22	57	54	41	32	52	44	43	60	63	47	51	42	33	48	39
LOC105223467	0.11	0.09	0	0.06	0	0.05	0.15	0.11	0.17	0.03	0.39	0.25	0	0.13	0.09	0.03	0.07	0.09	0.2	0	0.09	0.05	0.04	0.07	0.21	0.15	0.16	0.06	0.08	0.04	3	3	0	1	0	2	6	4	6	1	14	9	0	4	3	1	3	3	7
LOC105223469	0	0	0	0	0	0	0	0	0	0	0	0	0	0.18	0	0	0	0	0	0	0	0.13	0	0.18	0	0	0	0	0	0	0	0	0	0	0	0	0	0	0	0	0	0	0	2	0	0	0	0	0
LOC105223470	1.94	0	0.13	0	0.51	0.44	0	0.1	0.31	0	0	0.61	0.13	0	0	0.75	0.86	0.77	0.85	1	0	0.52	0	0.74	0.93	0.53	0	0.11	0	0.32	14	0	1	0	4	5	0	1	3	0	0	6	1	0	0	8	10	7	8
LOC105223472	0.56	2.14	0.38	2.31	2.73	4.54	2.04	2.35	1.34	1.53	1.63	4.28	1.81	2.35	1.78	2.66	0.17	0.67	1.39	0.91	1.83	3.67	1.57	1.12	2.96	1.72	2.25	0.88	1.94	0.32	4	20	3	10	21	51	22	24	13	15	16	42	14	19	16	28	2	6	13
LOC105223473	0	0	0	0	0	0.08	0	0.09	0	0.09	0	0.09	0	0	0	0	0.68	0.1	0.28	0.27	0	0	0	0	0	0.19	0	0	0	0	0	0	0	0	0	1	0	1	0	1	0	1	0	0	0	0	9	1	3
LOC105223474	4.34	4.47	3.35	3.03	4.47	2.99	6.09	5.85	3.38	5.5	2.58	2.51	4.65	2.93	6.76	4.21	4.83	5.74	4.21	3.57	3.94	5.44	4.12	5.01	3.06	5.99	4.84	6.94	7.1	6.98	38	51	32	16	42	41	80	73	40	66	31	30	44	29	74	54	68	63	48
LOC105223475	30.39	35.59	51.52	44.39	37.94	111.92	91.49	104	100.9	134.25	33.08	24.19	44.27	27.21	54.76	125.06	117.57	139.86	129.97	137.91	33.62	42.33	48.12	29.38	35.45	92.86	101.32	126.12	115.85	123.51	245	374	454	216	329	1415	1109	1196	1100	1485	366	267	386	248	553	1480	1526	1416	1366
LOC105223477	148.91	89.92	262.13	73.74	118.91	60.54	63.64	54.15	38.38	41.5	68.56	48.96	112.25	47.66	196.56	26.39	34.52	37.11	26.98	25.81	59.94	101.77	152.69	64.62	96.4	29.36	17.49	33.54	33.32	30.49	1211	953	2330	362	1040	772	778	628	422	463	765	545	987	438	2002	315	452	379	286
LOC105223478	0.56	1.08	1.46	1.71	0.26	0.84	1.31	1.05	1.04	1.5	0.75	0.82	1.13	0.66	0.3	1.4	1.57	1.94	2.01	0.82	0.33	1.99	0.53	0.17	0.21	0.5	1.43	1.77	1.91	1.83	6	15	17	11	3	14	21	16	15	22	11	12	13	8	4	22	27	26	28
LOC105223479	2.19	1.46	2	4.21	1.35	3.47	3.64	3.66	3.76	3.99	1.13	1.03	3.07	1.41	2.11	4.67	4.69	5.68	5.01	3.59	1.01	5.25	2.42	1.04	1.46	4.3	4.99	3.84	4.54	5.4	62	54	62	72	41	154	155	148	144	155	44	40	94	45	75	194	214	202	185
LOC105223480	0.1	0	0	0	0	0	0	0.07	0.08	0.07	0	0	0	0	0	0	0	0	0	0	0	0	0	0	0	0.24	0	0	0.3	0.12	1	0	0	0	0	0	0	1	1	1	0	0	0	0	0	0	0	0	0
LOC105223481	0.95	0.61	0.62	0.87	0.8	0.45	0.36	0.48	0.61	0.74	0.66	0.61	0.49	0.72	0.67	0.72	0.96	0.68	0.82	0.75	0.8	1	0.92	0.67	0.83	0.92	0.74	1	0.66	0.72	52	44	37	29	47	39	30	38	45	56	50	46	29	45	46	58	85	47	59
LOC105223482	1.39	0.71	2.12	2.49	2.15	5.53	4.46	4.79	4.96	3.29	0.76	1.1	2.03	0.82	2.12	3.86	3.66	5.8	3.64	3.28	0.96	4.19	2.86	1.24	0.9	2.76	4.7	5.56	2.62	3.86	12	8	20	13	20	75	58	59	58	39	9	13	19	8	23	49	51	63	41
LOC105223483	0	0	0	0	0	0	0	0	0	0	0	0	0	0	0	0	0	0	0	0	0	0	0	0	0	0	0	0	0	0	0	0	0	0	0	0	0	0	0	0	0	0	0	0	0	0	0	0	0
LOC105223484	450.53	398.6	447.62	451.53	452.79	391.22	311.84	328.64	313.86	339.39	402.13	429.13	409.09	423.69	451.65	278.7	306.78	333.5	273.41	282	413.16	434.92	432.02	414.06	399.3	275.78	297.96	324.41	377.46	317.12	2164	2496	2379	1331	2358	2969	2278	2272	2063	2268	2643	2830	2158	2310	2749	1993	2387	2034	1704
LOC105223485	0	0	0	0	0	0	0.02	0	0	0	0	0	0	0	0	0	0	0	0	0	0	0	0	0	0.11	0	0	0	0	0	0	0	0	0	0	0	1	0	0	0	0	0	0	0	0	0	0	0	0
LOC105223486	3.37	4.46	4.07	3.24	3.66	4.3	3.49	4.67	4.31	3.96	3.32	3.41	4.4	3.21	2.62	3.95	4.57	4.1	2.46	3.24	3.6	3.59	3.23	3.29	3.99	4.6	3.44	3.89	2.09	3.99	54	93	66	28	63	108	84	103	87	87	72	72	68	58	49	87	112	80	50
LOC105223488	1.27	1.15	0.64	0.67	1.35	1.18	1.42	1.06	0.51	0.55	0.59	0.55	0.96	0.97	0.92	0.95	0.58	0.83	1.2	0.8	0.89	0.87	0.72	1.09	0.52	1.2	1.32	0.96	1.52	1.03	22	26	12	7	25	32	37	26	12	13	14	13	18	19	20	24	16	18	27
LOC105223489	0.4	0.06	0.2	0.06	0.07	0.02	0.02	0.05	0.05	0.13	0.42	0.29	0.2	0.13	0.09	0.25	0.16	0.12	0.11	0.13	0.09	0	0	0.13	0.16	0.39	0.12	0.11	0.21	0.17	11	2	6	1	2	1	1	2	2	5	16	11	6	4	3	10	7	4	4
LOC105223490	0	0	0	0.19	0	0	0	0	0	0	3.28	0	2.6	0	0	1.3	0	0	0.17	0	0	0	0	0	0.88	2.69	0	0	0	0.09	0	0	0	1	0	0	0	0	0	0	40	0	25	0	0	17	0	0	2
LOC105223491	28.31	31.55	27.34	27.17	33.15	29.9	27.75	28.25	29.02	26.75	32.26	35.57	32.07	28.76	33.72	28.22	24.65	27.55	24.93	27.52	30.54	32.96	30.24	30.45	32.11	24.4	23.01	28.87	27.84	27.44	378	549	399	219	476	626	557	538	524	490	591	650	463	434	564	553	530	462	434
LOC105223492	7.7	11.55	8.45	7.65	9.86	10.53	12.97	10.98	10.44	9.29	7.17	8	8.39	11.81	8.54	11.83	10.25	12.47	11.15	9.88	10.17	8.56	10.29	6.65	7.83	8.43	9.27	11.73	10.99	9.94	90	176	108	54	124	193	228	183	165	149	115	128	106	156	125	203	193	183	170
LOC105223494	1.99	1.97	9.7	1.82	2.47	4.14	4.34	3.26	3.79	4.84	1.49	3.78	4.83	1.95	3.31	3.87	6.66	4.24	4.96	4.78	2.45	1.53	2.14	1.93	2.11	3.5	4.86	3.53	3.39	3.99	43	61	261	25	61	143	147	110	112	149	47	121	122	49	100	124	253	125	155
LOC105223495	0.88	0.9	0.93	0.88	0.93	0.99	0.91	1.18	1.68	1.38	0.76	0.84	0.6	1.06	0.61	1.08	1.73	1.51	1.65	1.44	0.88	1.05	0.7	1.21	0.98	1.63	1.16	1.16	0.73	1.73	45	60	52	27	51	79	70	86	116	97	53	59	33	61	39	81	142	97	110
LOC105223496	9.32	9.13	7.92	7.58	8.51	6.3	5.98	7.66	7.35	7.63	6.94	8.36	8.24	8.99	8.06	11.11	10.89	11.58	15.09	11.67	6.11	9.51	7.52	13.46	11.73	11.28	10.46	6.53	6.72	10.64	709	905	659	348	696	752	684	831	756	796	725	871	678	773	768	1241	1334	1106	1497
LOC105223497	11.23	9.84	12.05	9.25	10.65	14.22	16.22	16.67	15.31	14.42	9.6	10.95	8.49	11.4	9.13	13.57	19.6	13.49	14.58	14.14	11.16	8.57	8.53	9.42	9.5	13.07	14.3	15.28	13.13	15.21	662	756	776	329	675	1314	1437	1401	1220	1166	776	883	541	759	674	1174	1859	998	1120
LOC105223498	0.23	0.16	0.63	0.09	0.31	0.61	0.74	0.44	0.42	0.7	3.44	1.18	3.7	1.09	0.48	3.2	1.01	1.03	1.7	0.85	0.52	0.34	0.2	0.75	3.98	4.25	0.62	0.21	0.52	1.17	2	4	8	3	5	9	11	6	7	11	49	16	40	14	8	44	15	12	20
LOC105223499	20.98	15.73	16.68	16.58	15.89	15.01	18.53	20.26	17.15	14.29	17.3	12.64	20.71	14.48	15.28	19.67	14.24	13.45	16.34	11.74	18.54	12.82	14.38	17.36	21.98	25.17	15.23	12.04	11.54	13.98	1132	1104	983	539	925	1276	1503	1566	1255	1062	1286	935	1210	886	1035	1561	1242	913	1160
LOC105223500	1.02	1.26	1.21	1.51	1.15	1.18	0.99	0.94	0.71	0.77	12.64	0.87	13.66	0.81	0.85	12.82	0.98	0.74	4.39	1	1.01	1.01	0.98	1.35	10.49	19.53	1.19	1.07	0.95	1.15	48	77	62	43	58	87	70	63	45	50	816	56	695	43	50	885	74	44	269
LOC105223501	14.52	13.42	13.89	20.59	15.55	11.5	14.34	16.43	12.93	12.83	16.67	15.43	15.16	14.11	13.17	12.51	13.25	14.8	13.25	13.02	16.61	8.53	18.06	13.86	14.25	12.2	12.85	12.31	16.07	12.84	132	159	138	113	152	164	196	213	159	160	208	192	149	145	150	167	194	169	157
LOC105223502	0.31	0.06	0.07	0.13	0	0	0	0.11	0.06	0.11	25.93	0	27.09	0	0.06	29.1	0	0.24	9.94	0.22	0	0	0.43	0.07	29.03	37.74	0	0	0.06	0	4	1	1	1	0	0	0	2	1	2	464	0	382	0	1	557	0	4	169
LOC105223503	8.79	11.01	18.23	14.32	16.07	11.49	12.86	10.78	10.62	13.35	12.38	11.45	15.71	14.52	16.61	9.38	11.65	11.31	7.87	14.89	10.97	9.16	12.03	11.26	14.39	11.96	10.91	13.28	12.94	11.12	60	98	136	59	118	123	132	105	98	125	116	107	116	112	142	94	128	97	70
LOC105223504	7.43	6.68	9.05	11.8	7.53	7.06	5.32	8.01	5.42	7.32	8.62	9.84	8.24	9.16	8.92	9.04	7.73	9.71	8.88	7.7	11.69	8.9	15.67	8.65	13.33	5.88	7.89	9.21	5.76	9.05	145	170	193	139	158	216	156	223	143	196	231	263	174	202	218	259	243	238	226
LOC105223505	32.96	32.88	35.17	33.21	34.31	39.74	37.49	40.08	37.91	39.11	33.09	33.72	31.96	32.23	32.43	36.33	38.41	36.46	38.91	38.69	31.1	29.51	29.48	28.27	31.17	34.4	36.19	36.3	39.92	38.29	620	806	723	377	694	1172	1060	1075	964	1009	854	868	650	685	764	1003	1163	861	954
LOC105223506	1.21	1.34	0.96	0.34	1.36	0.62	0.78	0.65	1.23	1.33	0.86	0.86	0.37	1.18	0.94	0.74	1.16	1.16	1.27	1.56	0.53	0.71	0.82	1.88	1.67	0.87	0.62	1.24	0.71	1.23	30	43	26	5	36	24	29	23	41	45	29	29	10	33	29	27	46	36	41
LOC105223507	2.87	2.86	2.92	2.26	2.84	2.61	2.41	3.1	3.03	2.67	2.61	2.64	3.08	2.92	2.34	3.25	2.82	2.81	3.17	2.47	2.82	2.77	2.62	2.81	3.11	2.73	3.16	2.79	2.03	2.88	198	257	220	94	211	282	250	305	283	253	247	249	230	228	202	329	313	244	285
LOC105223508	10.12	7.04	7.39	9.08	8.58	8.62	3.97	11.71	9.86	10.89	8.16	8.79	7.4	9.83	7.75	13.56	18.51	15.45	18.14	16.73	7.91	13.57	9.52	13.19	13.89	12.41	14.13	8.86	9.1	12.21	397	360	317	215	362	530	234	655	523	586	439	472	314	436	381	781	1169	761	928
LOC105223509	0.11	0.25	0	0.18	0.25	0.21	0.43	0.26	0.4	0.35	0.12	0.39	0.4	0	0.47	0.15	0.13	0.3	0.58	0.43	0.06	0.13	0.36	0.1	0.72	0.17	0.05	0.17	0.24	0.12	2	6	0	2	5	6	12	7	10	9	3	10	8	0	11	4	4	7	14
LOC105223510	0	0	0	0.25	0	0	0	0	0	0	0.11	0	0	0	0	0	0	0	0.12	0	0.18	0.19	0	0	0	0	0	0	0	0.09	0	0	0	1	0	0	0	0	0	0	1	0	0	0	0	0	0	0	1
LOC105223511	13.16	12.92	14.43	11.59	14.94	9.6	7.81	12.55	7.89	8.95	16.81	13.56	18.53	15.53	13.02	12.8	13.33	9.49	13.69	10.81	14.87	14.6	12.4	14.62	16.55	11.69	9.79	9.91	11.39	10.57	222	284	266	118	271	254	198	302	180	207	389	313	338	296	275	317	362	201	301
LOC105223512	0	0	0	0.13	0	0.05	0	0	0.03	0.03	0.06	0.03	0.07	0	0	0	0	0	0	0	0.19	0	0	0	0	0	0	0	0	0.05	0	0	0	2	0	2	0	0	1	1	2	1	2	0	0	0	0	0	0
LOC105223513	40.93	44.63	39.89	47.91	45.4	42.27	34.92	35.72	30.93	34.7	42.72	43.15	43	40.84	46.53	30.69	32.33	32.15	27.56	36.35	40.72	46.3	42.16	40.26	40.24	29.81	31.54	33.14	41.1	30.77	368	523	392	260	439	596	472	458	376	428	527	531	418	415	524	405	468	363	323
LOC105223514	0	0	0	0	0	0	0	0	0	0	11.12	0	13.64	0	0	10.83	0.08	0	3.54	0	0	0.16	0	0	15.18	15.81	0	0	0	0	0	0	0	0	0	0	0	0	0	0	119	0	115	0	0	124	1	0	36
LOC105223516	1.34	2.18	0.57	1.71	2.01	1.6	1.3	0.72	1.13	1.38	1.05	2.83	2.91	1.37	1.56	0.98	1.39	1.47	1.8	1.49	0.7	1.29	1.54	0.52	1.73	1.19	1.05	0.81	0.83	1.05	13	29	6	10	21	25	20	10	15	19	14	39	32	15	19	14	23	19	24
LOC105223517	30.18	29.75	25.24	26.82	28.9	23.33	17.75	19.62	22.99	18.29	30.37	32.05	29.58	28.03	29.04	19.27	18.06	20.14	17.56	18.36	30.89	35.61	29.45	26.44	28.23	19.71	19.54	18.75	22.26	16.96	302	388	276	162	311	366	267	280	311	251	417	439	320	317	364	283	291	253	229
LOC105223518	14.52	14.2	10.54	20.74	10.72	12.23	13.86	14.68	13.28	19.87	19.95	24.04	16.6	18.73	16.99	14.65	13.35	11.82	13.6	13.04	16.07	16.21	13.46	19.71	13.86	16.81	10.51	23.58	20.8	17.34	131	167	104	113	104	173	188	189	162	246	247	297	162	191	192	194	194	134	160
LOC105223519	0.25	0.49	0.99	0.95	0.12	0.36	2.83	0.36	1.03	0.79	0.18	0.32	0	0.39	0.56	0.09	0.32	0.91	0.53	0.23	0.98	0.63	0.36	1.98	0	0.15	2.04	0.4	0.09	0.18	4	10	17	9	2	9	67	8	22	17	4	7	0	7	11	2	8	18	11
LOC105223520	0	0	0	0	0	0	0	0	0	0	0	0	0	0	0	0	0	0	0	0	0	0	0	0	0	0	0	0	0	0	0	0	0	0	0	0	0	0	0	0	0	0	0	0	0	0	0	0	0
LOC105223521	8.32	11.03	8.65	10.65	11.43	10.61	12.96	14.45	10.21	10.2	10.89	6.91	9.44	9.54	7.4	8.38	8.81	6.63	9.43	10.85	11.24	9.22	14.25	5.24	7.18	11.07	8.65	8.94	13.54	8.7	44	76	50	34	65	88	103	109	73	74	79	50	54	57	49	65	75	44	65
LOC105223522	0.06	0	0.06	0	0	0.08	0.2	0	0	0.04	0	0	0	0.05	0	0.12	0	0	0.05	0	0.57	0.08	0	0	0	0	0	0	0	0.1	1	0	1	0	0	2	5	0	0	1	0	0	0	1	0	3	0	0	1
LOC105223523	0.37	1.15	0.97	1.03	0.79	0.44	0.4	0.48	0.83	0.91	14.21	0.64	12.78	0.59	1.29	16.45	0.77	0.54	5.56	1.04	0.65	1.32	0.49	1.11	9.24	21.44	0.63	0.44	0.36	0.86	6	24	17	10	14	11	10	11	18	20	323	14	229	11	26	400	20	11	120
LOC105223524	93.88	184.37	125.71	162.68	283.34	655.54	366.38	380.8	307.18	386.05	148.46	319.92	121.5	155.08	187.16	316.38	160.3	302.38	320.32	448.5	177.85	213.26	226.25	201.66	228.46	361.41	490.99	169.83	571.19	133.69	1262	3230	1847	1320	4096	13817	7404	7300	5583	7119	2738	5886	1766	2356	3151	6242	3469	5104	5613
LOC105223525	0	0	0	0	0	0	0.1	0	0	0	0	0	0	0	0	0	0	0	0	0	0	0.39	0	0	0.53	0	0.27	0	0	0	0	0	0	0	0	0	1	0	0	0	0	0	0	0	0	0	0	0	0
LOC105223526	14.55	7.54	9.71	15.96	19.38	8.15	5.75	6.75	12.79	2.87	19.2	20.54	19.45	1.22	16.01	2.68	5.13	5.79	2.71	8.14	19.4	20.15	24.99	3.87	25.68	3.18	7.82	13.95	10.77	3.17	74	50	54	49	106	65	44	49	88	20	134	143	107	7	102	20	42	37	18
LOC105223528	98.85	110.19	108.18	137.82	175.44	258.81	150.43	176.26	89.07	180.47	114.03	185.86	138.4	92.31	140	188.63	73.85	118.14	153.44	175.87	94.66	222.26	121.7	163.31	178.14	216.33	273.6	63.12	228.37	57.89	1055	1524	1250	875	1977	4257	2371	2648	1280	2590	1645	2691	1577	1103	1849	2935	1244	1581	2110
LOC105223529	86.14	81.44	90.56	75.67	86.9	68.73	72.77	72.95	78.44	75.16	79.46	81.98	74.27	82.83	87.54	62.61	66.22	66.68	63.33	68.1	77.52	78.61	76.67	86.73	75.25	64.61	66.8	69.75	67.63	70.01	1107	1364	1272	587	1201	1385	1406	1337	1363	1325	1401	1442	1032	1203	1409	1181	1370	1076	1061
LOC105223530	1153.57	1268.05	817.83	1494.79	1886.02	3857.22	2277.36	1996.75	1537.82	2672.22	1286.84	1561.68	1249.44	1177.84	1760.73	2073.76	1336.19	1628.3	2172.89	3550.08	871.24	2604.81	1237.56	1335.79	2481.19	2380.71	2628.11	1730.11	2730.96	652.87	7271	10416	5634	5687	12784	38120	21579	17948	13105	23105	11128	13472	8515	8390	13899	19184	13558	12887	17853
LOC105223531	29.66	31.1	19.72	17.97	21.33	45.29	63.11	24.65	20.61	28.23	18.52	30.3	17.78	10.95	17.76	16.75	10.24	29.41	26.97	45.88	22.21	57.17	23.78	30.32	74.38	38.18	63.12	10.72	51.16	5.13	216	295	157	79	167	517	691	256	203	282	185	302	140	90	162	179	120	269	256
LOC105223532	106.19	106.88	81.84	111.62	125.49	281.83	106.28	163.57	149.36	124.8	90.9	179.21	76.53	125.51	144.09	182.29	75.88	247.27	183.02	188.16	77.53	167.24	112.13	117.45	112.43	234.01	219.67	108.87	216.55	116.06	539	707	454	342	685	2243	811	1184	1025	869	633	1245	420	720	916	1358	620	1576	1211
LOC105223533	0.76	0.15	0	0.95	0	0	0	0	0	0	0.28	0	0.35	0	0.61	0	0	0	0	0	0	0.24	0	0.34	0.64	0	0	0	0	0	4	1	0	3	0	0	0	0	0	0	2	0	2	0	4	0	0	0	0
LOC105223534	83.75	81.42	82.88	69.85	75.71	61.18	63.23	62.36	55.41	59.3	71.93	75.29	78.55	69.55	71.71	58.37	56.12	58.57	55.82	58.6	78.11	67.63	89.24	63.96	70.31	53.76	60.2	56.69	58.89	54.18	3544	4490	3833	1784	3445	4059	4022	3763	3170	3442	4176	4360	3594	3326	3800	3625	3823	3112	3079
LOC105223535	2.93	2.55	3.21	2.64	3.19	2.62	2.73	2.66	3.1	3.22	3.11	2.29	2.88	3.12	2.28	1.94	2.45	2.6	2.33	2.18	1.87	2.09	2.47	1.85	1.99	2.36	2.15	2.64	1.94	2.8	112	127	134	61	131	157	157	145	160	169	163	120	119	135	109	109	151	125	116
LOC105223536	4.97	3.87	4.24	4.75	4	2.97	3.03	2.57	4.05	3.73	4.07	3.78	3.48	4.28	4.33	3.38	3.13	4.38	4.48	4.28	3.59	3.84	3.6	4.6	3.6	3.86	3.58	2.82	2.59	3.22	194	197	181	112	168	182	178	143	214	200	218	202	147	189	212	194	197	215	228
LOC105223537	15.2	12.8	13.73	12.25	14.18	11.57	12.27	14.55	11.34	12.53	13.62	15.45	15.59	12.52	12.95	14.3	14.04	12.3	12.19	10.82	13.35	14.18	13.11	15.92	16.88	14.84	11.71	10.04	10.8	11.12	689	756	680	335	691	822	836	940	695	779	847	958	764	641	735	951	1024	700	720
LOC105223538	16.88	19.13	19.38	16.49	17.96	13.2	12.6	12.5	13.74	13.2	18.33	19.02	18.33	17.56	19.16	10.63	12.22	10.25	11.67	12.59	19.32	13.91	16.99	19.97	17.37	11.87	13.64	10.38	11.9	10.79	445	639	558	236	495	539	478	468	472	458	635	681	503	521	637	404	534	325	396
LOC105223539	0	0	0	0	0	0	0	0	0	0.08	0	0	0.05	0	0	0.07	0.07	0	0	0	0	0.21	0	0	0	0	0.14	0	0.04	0.03	0	0	0	0	0	0	0	0	0	2	0	0	1	0	0	2	2	0	0
LOC105223540	11.95	14.64	14.86	13.63	13.55	11	9.93	11.63	8.77	9.95	11.9	12.98	11.62	11.5	10.66	8.95	10.01	9.55	8.76	10.52	12.91	9.19	14.72	10.76	11.1	8.63	9.15	12.15	10.07	9.47	273	436	371	188	333	394	341	379	271	312	373	406	287	297	305	300	368	274	261
LOC105223541	2.88	2.33	2	2.94	2.39	1.49	1.78	1.48	1.69	1.61	3.78	2.5	3.47	1.84	2.58	2.22	1.56	1.41	1.67	1.23	2.9	2.5	2.89	2.96	3.18	3.17	1.3	1.8	1.8	1.57	112	118	85	69	100	91	104	82	89	86	202	133	146	81	126	127	98	69	85
LOC105223542	27.87	17.8	21.6	24.9	23.5	27.65	24.27	24.24	26.41	22.01	18.58	20.15	14.89	19.78	24.57	20.67	27.1	23.56	21.04	22.49	20.03	22.14	18.28	17.67	17.7	19.3	19.82	23.83	31.71	24.22	142	125	125	80	135	230	191	181	189	158	132	144	83	117	161	158	228	155	150
LOC105223543	14.69	12.28	10.62	10.95	14.61	11.76	9.88	12.26	11.48	11.14	11.67	11.53	13.59	11.93	13.91	12.77	11.64	9.69	11.04	10.39	11.22	13.44	10.8	14.04	12	10.46	11.27	10.03	11.4	10.46	447	487	353	201	478	561	452	532	472	465	487	480	447	410	530	570	570	370	438
LOC105223545	2.05	0.51	3.44	0.09	0.21	0.25	0.51	0.31	0.29	0.36	0.64	0.61	2.35	1.37	1.46	0.72	2.82	1.15	0.85	0.24	0	0.76	0.37	0.4	0.8	0.72	0.19	0.17	0.2	0.03	37	12	68	1	4	7	14	8	7	9	16	15	46	28	33	19	82	26	20
LOC105223546	0	0	0	0	0	0	0	0	0	0	0	0	0	0	0	0	0	0	0	0	0	0.14	0	0	0	0	0.2	0	0	0	0	0	0	0	0	0	0	0	0	0	0	0	0	0	0	0	0	0	0
LOC105223547	1.28	0	3.1	0.75	0.21	0.29	0.05	0.74	0.17	0.11	0	0.83	3.28	0.4	0.54	0.51	2.81	0.9	1.27	0.44	0.27	0.38	0.08	0.34	0.84	0.87	0.77	0.18	0	0.22	17	0	45	6	3	6	1	14	3	2	0	15	47	6	9	10	60	15	22
LOC105223548	3.92	3.81	3.66	3.25	2.68	3.9	3.92	3.75	3.24	3.31	3.45	4.24	4.14	3.44	3.38	3.51	3.27	2.76	3.07	3.1	3.06	4.28	3.89	3.82	4.3	2.7	3.29	3.95	3.79	2.92	102	129	104	51	75	159	153	139	114	118	123	151	111	101	110	134	137	90	104
LOC105223549	7.78	5.34	6.17	5.05	6.33	4.26	5.4	4.6	4.33	5.03	6.07	6.22	6.72	5.48	5.36	5.36	6.42	6.39	6.37	5.76	5.04	8.89	5.87	8.07	6.41	5.76	5.63	3.58	4.77	5.11	255	228	221	100	223	219	266	215	192	226	273	279	238	203	220	258	339	263	272
LOC105223550	3.43	4.47	6.22	4.78	4.7	1.8	2.96	2.28	1.82	2.5	6.05	6.37	4.62	4.2	5.23	2.09	2.09	1.48	2.08	1.4	4.65	3.83	6.76	5.32	9.06	1.71	1.27	1.94	1.62	1.52	57	97	113	48	84	47	74	54	41	57	138	145	83	79	109	51	56	31	45
LOC105223551	8.34	6.49	6.11	6.45	7.55	7.09	6.95	5.3	7.24	6.32	7.38	6.5	6.17	5.31	5.33	6.29	5.66	5.93	4.95	5.41	6.48	6.95	5.5	8.05	6.09	5.74	6.12	5.35	7.15	5.44	75	76	60	35	73	100	94	68	88	78	91	80	60	54	60	83	82	67	58
LOC105223552	6.57	7.39	8.94	5.17	7.41	6.92	7.68	6.37	6.2	6.76	6.21	8.8	7.98	4.98	8.05	7.25	10.53	6.29	8.05	6.46	6.26	6.71	6.22	6.9	6.9	10.03	9.07	6.92	6.95	5.57	333	488	495	158	404	550	585	460	425	470	432	610	437	285	511	539	859	400	532
LOC105223553	0	0	0	0.16	0	0	0	0	0	0	6.02	0	7.63	0	0	2.91	0	0.15	1.02	0	0	0	0	0	1.8	4.9	0	0	0	0	0	0	0	1	0	0	0	0	0	0	87	0	87	0	0	45	0	2	14
LOC105223554	0.98	1.12	0.81	0.7	0.86	0.8	0.99	0.9	1.04	0.58	1.1	0.8	0.56	0.68	0.97	1.19	0.7	1.07	0.99	1.06	1.34	0.86	0.92	0.64	0.78	1.19	0.74	0.73	0.76	1.11	70	104	63	30	66	89	106	91	100	57	107	78	43	55	86	124	80	96	92
LOC105223555	0.01	0	0	0	0	0.06	0.03	0	0	0.03	0.01	0.02	0	0.01	0	0	0.02	0	0.03	0.02	0	0	0.01	0	0	0.03	0	0	0.05	0.04	1	0	0	0	0	7	4	0	0	3	1	2	0	1	0	0	3	0	3
LOC105223556	14.81	16.25	13.52	13.09	15.14	17.35	13.77	15.02	15.62	15.09	13.8	16.33	16.42	14.83	15.65	16.84	15.22	16.31	16.62	18.18	15.47	14.23	13.4	14.84	15.43	14.4	19.04	12.31	12.38	17.17	553	791	552	295	608	1016	773	800	789	773	707	835	663	626	732	923	915	765	809
LOC105223557	10.93	11.05	12.52	9.89	11.54	9.63	10.13	10	10	10.21	11.69	11.16	11.75	10.18	9.92	9.53	9.61	8.47	9.39	10.07	11.47	12.09	11.93	11.18	9.98	9.16	9.58	9.37	8.2	9.11	511	673	640	279	580	706	712	667	632	655	750	714	594	538	581	654	723	497	572
LOC105223558	2.16	1.18	0.9	1.33	1.49	0.79	1.11	1.51	0.73	1.71	1.21	1.62	0.91	0.98	1.08	0.97	1.34	1.52	1.13	1.43	1.03	1.39	2.15	1.38	1.72	1.19	1.1	1.31	0.9	1.13	35	25	16	13	26	20	27	35	16	38	27	36	16	18	22	23	35	31	24
LOC105223559	5.13	4.44	5.06	5.74	4.28	3.58	4.05	4.27	4.35	4.16	9.11	4.01	9.53	4.89	5.22	11	5.61	4.33	7.3	5.48	4.01	5.98	4.59	3.29	9.06	13.58	4.86	3.35	3.72	4.52	117	132	126	79	105	128	139	139	134	130	285	125	235	126	149	368	206	124	217
LOC105223560	0.25	0.76	0.91	0	1.62	0.63	0.99	0	0.92	0.18	0.18	1.45	0.23	0.44	0.59	0.34	0.15	0.4	0	0.72	0.89	0.31	0.28	1.55	1.39	0.19	0.63	0.78	0.54	0.57	1	4	4	0	7	4	6	0	5	1	1	8	1	2	3	2	1	2	0
LOC105223561	11.19	9.58	10.74	9.58	9.94	8.55	9.17	9.7	9.36	8.58	11.21	9.4	13.22	8.71	8.1	10.88	9.19	11.65	11.28	9.28	8.82	9.69	10.32	11.27	10.67	11.33	8.66	7.24	8.08	8.68	267	298	280	138	255	320	329	330	302	281	367	307	341	235	242	381	353	349	351
LOC105223562	8.6	10.45	7.45	3.44	6.98	7.22	4.8	5.63	4.1	4.71	7.03	8.43	8.81	7.35	9.54	4.37	4.02	3.63	3.99	5.74	7.27	7.51	5.13	6.55	8.44	4.22	6.11	4.91	5.69	6.74	149	236	141	36	130	196	125	139	96	112	167	200	165	144	207	111	112	79	90
[truncated: 11,578 more rows]
[truncated: 20 more columns]
