# Supplementary material for: Protein feeding mediates sex pheromone biosynthesis in an insect
Source: eLife. 2023 Jan 19;12:e83469. doi: 10.7554/eLife.83469 (PMC9908074; doi:10.7554/eLife.83469)
Supplement: Supplementary file 4. [file elife-83469-supp4.xlsx]

## Sheet: Sucrose vs Sucrose+YH
id	Sucrose-1_count	Sucrose-2_count	Sucrose-3_count	Sucrose-4_count	Sucrose-5_count	Sucrose-yeast-1_count	Sucrose-yeast-2_count	Sucrose-yeast-3_count	Sucrose-yeast-4_count	Sucrose-yeast-5_count	Sucrose-1_fpkm	Sucrose-2_fpkm	Sucrose-3_fpkm	Sucrose-4_fpkm	Sucrose-5_fpkm	Sucrose-yeast-1_fpkm	Sucrose-yeast-2_fpkm	Sucrose-yeast-3_fpkm	Sucrose-yeast-4_fpkm	Sucrose-yeast-5_fpkm	Sucrose_mean	Sucrose-yeast_mean	log2(fc)	PValue	FDR	Symbol	Description	KEGG_A_class	KEGG_B_class	Pathway	K_ID	GO Component	GO Function	GO Process
LOC105231178	3277	2576	2394	4070	2977	18	13	18	17	15	248.74	205.62	171.92	232.25	212.26	0.89	0.7	0.91	0.79	0.55	214.158	0.768	-8.12335	0	0	Acp1	PREDICTED: adult cuticle protein 1-like [Bactrocera dorsalis]	-	-	-	-	-	-	-
LOC105233903	3114	2428	2553	4069	2791	73	81	106	76	112	278.88	228.66	216.31	273.95	234.78	4.24	5.17	6.29	4.18	4.85	246.516	4.946	-5.63928	0	0	--	PREDICTED: DNA-directed RNA polymerase II subunit RPB1 [Bactrocera dorsalis]	-	-	-	-	-	GO:0005214//structural constituent of chitin-based cuticle	GO:0042335//cuticle development
LOC105231177	39910	34938	35626	57566	39686	659	846	1301	828	1221	4093.6	3768.57	3457.17	4439	3823.66	43.8	61.79	88.48	52.17	60.6	3916.4	61.368	-5.9959	7.7064e-265	3.01295e-261	Acp1	PREDICTED: adult cuticle protein 1-like [Bactrocera dorsalis]	-	-	-	-	-	-	-
LOC105222552	1229	1259	1223	2192	1382	33	10	19	19	36	34.09	36.73	32.1	45.71	36.01	0.59	0.2	0.35	0.32	0.48	36.928	0.388	-6.57251	1.50092e-243	4.40108e-240	--	PREDICTED: mucin-5AC [Bactrocera dorsalis]	-	-	-	-	-	-	-
LOC105231383	1073	843	1077	1365	1019	17	13	18	7	11	32.31	26.7	30.68	30.9	28.82	0.33	0.28	0.36	0.13	0.16	29.882	0.252	-6.88971	1.83941e-237	4.3149e-234	-	-	-	-	-	-	-	-	-
LOC105229941	1838	1575	1610	2560	1880	1	8	14	9	4	193.55	174.42	160.4	202.67	185.97	0.07	0.6	0.98	0.58	0.2	183.402	0.486	-8.55984	2.23403e-226	4.36715e-223	--	PREDICTED: cuticle protein 1 [Bactrocera dorsalis]	-	-	-	-	-	-	-
LOC105231181	9016	8094	7652	11985	8559	119	193	269	187	204	1360.97	1284.85	1092.8	1360.09	1213.6	11.64	20.75	26.92	17.34	14.9	1262.46	18.31	-6.10746	1.08459e-225	1.8173e-222	Acp1	PREDICTED: adult cuticle protein 1 [Bactrocera dorsalis]	-	-	-	-	-	-	-
LOC105232280	1542	1580	1683	2579	1664	24	25	56	21	40	71.9	77.44	74.25	90.44	72.98	0.72	0.85	1.73	0.6	0.9	77.402	0.96	-6.33319	1.28211e-209	1.87973e-206	--	PREDICTED: proline-rich protein 4 [Bactrocera dorsalis]	-	-	-	-	-	-	-
LOC105234185	1532	1331	1470	2046	1280	31	31	66	41	53	115.06	105.12	104.45	115.52	90.3	1.51	1.66	3.29	1.89	1.93	106.09	2.056	-5.6893	1.9523e-209	2.54429e-206	--	PREDICTED: early nodulin-75 [Bactrocera dorsalis]	-	-	-	-	-	-	-
LOC105222387	889	945	777	1302	832	75	66	94	60	91	61.84	69.13	51.14	68.09	54.37	3.38	3.27	4.34	2.56	3.06	60.914	3.322	-4.19665	9.70671e-162	1.1385e-158	--	AGAP010196-PA-like protein [Anopheles sinensis]	-	-	-	-	-	-	-
LOC105226224	558	588	586	1035	733	64	65	75	59	83	8.46	9.38	8.41	11.8	10.44	0.63	0.7	0.76	0.55	0.61	9.698	0.65	-3.89918	6.00045e-161	6.39812e-158	--	PREDICTED: proteoglycan 4 [Bactrocera dorsalis]	-	-	-	-	-	-	-
LOC105224719	1861	1407	1477	2144	1778	68	102	106	60	142	101.81	80.95	76.45	88.18	91.37	2.41	3.97	3.85	2.02	3.76	87.752	3.202	-4.77639	8.51329e-155	8.32103e-152	--	PREDICTED: glycine-rich cell wall structural protein-like, partial [Bactrocera dorsalis]	-	-	-	-	-	-	-
LOC105227241	557	582	664	1039	643	36	29	38	24	68	26.37	28.98	29.74	36.98	28.6	1.1	1	1.19	0.7	1.56	30.134	1.11	-4.76276	8.9517e-150	8.0765e-147	--	GH12870 [Drosophila grimshawi]	-	-	-	-	-	GO:0016787//hydrolase activity;GO:0097367//carbohydrate derivative binding	GO:0006022//aminoglycan metabolic process;GO:0044238//primary metabolic process
LOC105228262	679	595	602	973	718	4261	3775	3879	4838	5611	18.79	17.25	15.64	20.4	18.73	76.8	74.61	71.11	81.92	75.09	18.162	75.906	2.06329	1.97436e-148	1.65409e-145	ADAMTS12	PREDICTED: A disintegrin and metalloproteinase with thrombospondin motifs 12 isoform X1 [Bactrocera dorsalis]	-	-	-	-	GO:0031012//extracellular matrix	GO:0016787//hydrolase activity	-
LOC105232494	376	297	351	437	336	24	26	27	24	33	45.23	37.57	39.94	39.52	37.96	1.87	2.23	2.15	1.77	1.92	40.044	1.988	-4.3322	9.68669e-143	7.57434e-140	--	PREDICTED: general odorant-binding protein 99a [Bactrocera dorsalis]	-	-	-	-	-	-	-
LOC105222454	3664	3017	3137	5880	3102	55	82	126	46	82	230.51	199.6	186.71	278.1	183.31	2.24	3.67	5.26	1.78	2.5	215.646	3.09	-6.12491	1.84123e-134	1.34973e-131	Ccp84Ab	PREDICTED: cuticle protein 7 [Bactrocera dorsalis]	-	-	-	-	-	-	-
LOC105226562	324	326	363	515	328	15	12	20	7	13	5.32	5.36	5.06	5.78	4.71	0.15	0.12	0.19	0.08	0.09	5.246	0.126	-5.37972	1.74509e-129	1.20401e-126	chs-2	PREDICTED: uncharacterized LOC105226562 isoform X1 [Bactrocera dorsalis]	Metabolism	Carbohydrate metabolism	ko00520//Amino sugar and nucleotide sugar metabolism	K00698	-	GO:0016757//transferase activity, transferring glycosyl groups	-
LOC105229866	580	487	531	807	526	32	61	27	37	56	89.07	78.64	77.14	93.16	75.87	3.18	6.67	2.75	3.49	4.16	82.776	4.05	-4.35322	1.08772e-114	7.0877e-112	--	PREDICTED: glycine-rich protein 5-like [Bactrocera dorsalis]	-	-	-	-	-	-	-
LOC105232977	669	632	633	863	619	126	138	132	176	154	24.46	24.3	21.89	23.72	21.26	2.98	3.59	3.2	3.95	2.72	23.126	3.288	-2.81423	9.65417e-112	5.95967e-109	-	-	-	-	-	-	-	-	-
LOC105233255	739	591	509	1075	716	0	6	2	7	8	50.52	42.48	32.92	55.25	45.98	0	0.29	0.09	0.29	0.26	45.43	0.186	-7.9322	1.56998e-110	9.20712e-108	--	PREDICTED: pupal cuticle protein [Bactrocera dorsalis]	-	-	-	-	-	-	-
LOC105231180	5582	3690	3987	7933	4659	8	31	32	43	27	660.24	458.98	446.16	705.42	517.64	0.61	2.61	2.51	3.12	1.55	557.688	2.08	-8.06673	5.23845e-108	2.9258e-105	Acp1	PREDICTED: adult cuticle protein 1-like [Bactrocera dorsalis]	-	-	-	-	-	-	-
LOC105222634	355	406	289	428	337	3063	2929	3334	2837	4554	15.74	18.94	12.12	14.29	14.04	88.16	92.57	98.14	77.35	97.83	15.026	90.81	2.59539	1.44935e-106	7.72704e-104	AGAP009593	PREDICTED: carboxypeptidase B [Bactrocera dorsalis]	-	-	-	-	-	GO:0008235//metalloexopeptidase activity;GO:0046914//transition metal ion binding	GO:0019538//protein metabolic process
LOC105234027	498	510	518	736	492	40	59	61	75	109	28.66	30.86	28.2	31.84	26.59	1.49	2.42	2.33	2.65	3.04	29.23	2.386	-3.61478	1.57677e-106	8.04087e-104	TFPI2	PREDICTED: probable serine/threonine-protein kinase clkA [Bactrocera dorsalis]	-	-	-	-	GO:0043229//intracellular organelle	GO:0004866//endopeptidase inhibitor activity;GO:0008200//ion channel inhibitor activity	GO:0010466//negative regulation of peptidase activity
LOC105234186	671	417	547	905	588	23	24	38	13	38	46.86	30.62	36.14	47.51	38.57	1.04	1.19	1.76	0.56	1.28	39.94	1.166	-5.09819	3.88963e-104	1.90089e-101	--	PREDICTED: tyrosine-protein phosphatase non-receptor type 23 [Bactrocera dorsalis]	-	-	-	-	-	-	-
LOC105229065	1329	1365	1473	1975	1681	5961	4521	5330	5750	7421	89.7	96.88	94.06	100.21	106.57	260.68	217.29	238.53	238.41	242.36	97.484	239.454	1.29651	7.33828e-104	3.44283e-101	CG1139	PREDICTED: proton-coupled amino acid transporter-like protein CG1139 [Bactrocera dorsalis]	Organismal Systems	Digestive system	ko04974//Protein digestion and absorption	K14209	GO:0031224//intrinsic component of membrane	-	-
LOC105233804	534	310	476	458	411	4464	5064	5671	5522	7982	59.47	36.3	50.15	38.34	42.99	322.09	401.58	418.75	377.77	430.12	45.45	390.062	3.10135	1.74514e-96	7.87258e-94	--	PREDICTED: uncharacterized protein LOC105233804 [Bactrocera dorsalis]	-	-	-	-	-	-	-
LOC105224910	383	257	305	562	341	11	3	14	8	16	31.49	22.22	23.73	34.74	26.34	0.59	0.18	0.76	0.4	0.64	27.704	0.514	-5.75218	5.42413e-94	2.35628e-91	--	PREDICTED: brain acid soluble protein 1 homolog [Bactrocera dorsalis]	-	-	-	-	-	-	-
LOC105224952	635	593	715	891	681	293	248	311	331	412	22.15	21.75	23.6	23.37	22.31	6.62	6.16	7.19	7.09	6.95	22.636	6.802	-1.73459	4.44223e-88	1.86082e-85	MSSP1	PREDICTED: synaptic vesicle glycoprotein 2A [Bactrocera dorsalis]	-	-	-	-	-	GO:0005215//transporter activity	GO:0044763//single-organism cellular process
LOC105230878	393	398	449	515	449	2010	2061	2163	2729	2708	32.49	34.6	35.12	32.01	34.87	107.67	121.34	118.58	138.61	108.34	33.818	118.908	1.81398	4.08851e-86	1.65359e-83	--	PREDICTED: alpha-tocopherol transfer protein-like [Bactrocera dorsalis]	-	-	-	-	GO:0044464//cell part	-	GO:0051234//establishment of localization
LOC105227073	460	461	467	668	465	138	160	149	148	237	29.8	31.41	28.62	32.53	28.3	5.79	7.38	6.4	5.89	7.43	30.132	6.578	-2.19558	3.05868e-85	1.19584e-82	--	PREDICTED: mediator of RNA polymerase II transcription subunit 15 isoform X2 [Bactrocera oleae]	-	-	-	-	-	-	-
LOC105232734	198	162	240	246	245	18	13	21	24	31	29.64	25.5	33.99	27.68	34.45	1.75	1.39	2.08	2.21	2.25	30.252	1.936	-3.96588	2.82231e-83	1.06783e-80	CP12	PREDICTED: endocuticle structural protein SgAbd-6 [Bactrocera dorsalis]	-	-	-	-	-	-	-
LOC105233083	408	326	486	593	355	2691	3014	3437	2999	4289	39.1	32.86	44.07	42.73	31.96	167.1	205.7	218.41	176.57	198.9	38.144	193.336	2.34158	4.09306e-81	1.50024e-78	ADH	PREDICTED: alcohol dehydrogenase [Bactrocera dorsalis]	-	-	-	-	-	GO:0003824//catalytic activity	GO:0044281//small molecule metabolic process
LOC105230010	439	706	500	590	561	4859	3984	4218	4363	5324	45.47	76.89	48.99	45.94	54.58	326.06	293.83	289.67	277.59	266.81	54.374	290.792	2.419	7.71957e-79	2.74372e-76	rgn	PREDICTED: regucalcin-like [Bactrocera dorsalis]	-	-	-	-	-	-	-
LOC115065892	307	390	363	741	432	22	23	25	10	47	7.11	9.5	7.96	12.91	9.4	0.33	0.38	0.38	0.14	0.53	9.376	0.352	-4.73533	3.49559e-73	1.20588e-70	--	PREDICTED: LOW QUALITY PROTEIN: uncharacterized threonine-rich GPI-anchored glycoprotein PJ4664.02 [Bactrocera dorsalis]	Metabolism;Metabolism	Global and overview maps;Carbohydrate metabolism	ko01100//Metabolic pathways;ko00520//Amino sugar and nucleotide sugar metabolism	K01183;K01183	-	GO:0016798//hydrolase activity, acting on glycosyl bonds	GO:0006022//aminoglycan metabolic process
LOC105223395	780	752	871	1410	851	4101	3854	4594	4573	6177	56.73	56.7	60	76.77	58.13	193.17	199.11	221.78	204.14	217.72	61.666	207.184	1.74837	1.44485e-71	4.84189e-69	Ttpal	PREDICTED: alpha-tocopherol transfer protein-like isoform X1 [Bactrocera dorsalis]	-	-	-	-	GO:0044464//cell part	-	GO:0051234//establishment of localization
LOC105232962	370	392	538	572	381	2297	2565	2615	2950	4171	24.04	26.79	33.08	27.94	23.26	96.71	118.7	112.68	117.77	131.15	27.022	115.402	2.09446	4.16345e-71	1.35647e-68	--	GL21861 [Drosophila persimilis]	-	-	-	-	-	-	-
LOC105229573	63	70	79	88	94	456	508	441	539	721	3.22	3.76	3.82	3.38	4.51	15.1	18.49	14.95	16.92	17.83	3.738	16.658	2.15588	1.78898e-69	5.67107e-67	SLC22A8	PREDICTED: organic cation transporter protein [Bactrocera dorsalis]	-	-	-	-	GO:0031224//intrinsic component of membrane	GO:0005215//transporter activity	GO:0044763//single-organism cellular process
LOC105225353	714	665	668	914	702	2714	2981	2586	3376	4524	40.97	39.14	36.8	38.67	38.22	96.7	117.04	94.57	113.95	119.11	38.76	108.274	1.48205	3.27638e-65	1.01128e-62	AANAT1	PREDICTED: dopamine N-acetyltransferase isoform X1 [Bactrocera dorsalis]	Metabolism;Metabolism	Global and overview maps;Amino acid metabolism	ko01100//Metabolic pathways;ko00380//Tryptophan metabolism	K00669;K00669	-	-	-
LOC105233219	258	306	422	436	289	1954	1691	2020	2006	3119	13.03	16.25	20.17	16.56	13.71	63.95	60.82	67.65	62.24	76.23	15.944	66.178	2.05334	1.61756e-64	4.86472e-62	-	-	-	-	-	-	-	-	-
LOC105232877	25	17	31	35	24	352	476	548	738	765	1.15	0.82	1.35	1.21	1.04	10.52	15.63	16.76	20.91	17.07	1.114	16.178	3.86021	9.09213e-64	2.66604e-61	PPO2	PREDICTED: LOW QUALITY PROTEIN: phenoloxidase 2 [Bactrocera dorsalis]	-	-	-	-	-	-	-
LOC105232323	503	517	560	622	503	259	237	235	286	361	16.28	17.5	16.94	15.03	15.26	5.36	5.48	5.04	5.67	5.62	16.202	5.434	-1.57609	5.48763e-63	1.56986e-60	spi	PREDICTED: protein spitz [Bactrocera dorsalis]	Environmental Information Processing	Signal transduction	ko04013//MAPK signaling pathway - fly	K20229	-	-	-
LOC105226078	88	44	89	92	72	783	694	731	831	766	4.95	2.6	4.74	3.89	3.8	28.53	27.79	27.26	28.71	20.85	3.996	26.628	2.73632	1.07535e-62	3.00305e-60	Snmp1	PREDICTED: sensory neuron membrane protein 1 [Bactrocera dorsalis]	-	-	-	-	-	-	-
LOC105222583	530	449	498	717	482	139	148	196	167	229	20.78	17.35	17.12	20.34	17.59	3.45	4.11	4.88	3.88	4.18	18.636	4.1	-2.1844	1.12295e-62	3.06305e-60	thbs3a	PREDICTED: cartilage oligomeric matrix protein isoform X1 [Bactrocera dorsalis]	Human Diseases;Environmental Information Processing;Cellular Processes;Cellular Processes;Environmental Information Processing;Human Diseases	Infectious diseases;Signal transduction;Cellular community - eukaryotes;Transport and catabolism;Signaling molecules and interaction;Infectious diseases	ko05165//Human papillomavirus infection;ko04151//PI3K-Akt signaling pathway;ko04510//Focal adhesion;ko04145//Phagosome;ko04512//ECM-receptor interaction;ko05144//Malaria	K04659;K04659;K04659;K04659;K04659;K04659	-	-	GO:0022610//biological adhesion
LOC105224047	304	273	397	603	283	2703	2507	3059	2628	4402	19.24	18.17	23.77	28.69	16.82	110.83	112.98	128.36	102.19	134.81	21.338	117.834	2.46526	2.70071e-62	7.19922e-60	-	-	-	-	-	-	-	-	-
MSTRG.2965	473	559	651	587	455	76	85	106	103	171	7.69	9.52	9.86	7.02	6.85	0.76	0.93	1.16	0.99	1.32	8.188	1.032	-2.98807	3.01942e-62	7.86996e-60	Insrr	PREDICTED: receptor-type guanylate cyclase gcy-8-like [Bactrocera latifrons]	-	-	-	-	GO:0016021//integral component of membrane;GO:0043231//intracellular membrane-bounded organelle;GO:0043235//receptor complex;GO:0044444//cytoplasmic part;GO:0044459//plasma membrane part	GO:0004714//transmembrane receptor protein tyrosine kinase activity;GO:0004869//cysteine-type endopeptidase inhibitor activity;GO:0005102//receptor binding;GO:0005504//fatty acid binding;GO:0005520//insulin-like growth factor binding;GO:0019901//protein kinase binding;GO:0019902//phosphatase binding;GO:0019904//protein domain specific binding;GO:0032550//purine ribonucleoside binding	GO:0002009//morphogenesis of an epithelium;GO:0002376//immune system process;GO:0006275//regulation of DNA replication;GO:0006469//negative regulation of protein kinase activity;GO:0007088//regulation of mitotic nuclear division;GO:0007169//transmembrane receptor protein tyrosine kinase signaling pathway;GO:0007530//sex determination;GO:0009746//response to hexose;GO:0009792//embryo development e…
LOC105228743	973	1011	1473	1472	1209	5958	5526	7352	8299	9847	51.69	56.48	74.04	58.79	60.33	205.09	209.06	258.99	270.86	253.14	60.266	239.428	1.99018	2.95931e-61	7.54561e-59	Ttpal	PREDICTED: alpha-tocopherol transfer protein-like [Bactrocera dorsalis]	-	-	-	-	GO:0044464//cell part	-	GO:0051234//establishment of localization
LOC105232279	2104	1922	2066	3321	2280	31	18	91	32	52	89.26	85.75	82.92	105.92	90.86	0.85	0.54	2.56	0.83	1.07	90.942	1.17	-6.28037	7.53413e-60	1.88017e-57	--	PREDICTED: tetra-peptide repeat homeobox protein 1 [Bactrocera dorsalis]	-	-	-	-	-	-	-
LOC105223668	3185	2849	2921	3391	2568	12224	13219	14767	16244	19734	130.75	122.99	113.45	104.65	99.03	325.14	386.44	401.97	409.66	392.01	114.174	383.044	1.74628	4.40022e-59	1.07521e-56	AAEL008004	Elongation of very long chain fatty acids protein AAEL008004 [Bactrocera dorsalis]	-	-	-	-	GO:0031224//intrinsic component of membrane	GO:0003824//catalytic activity	GO:0006631//fatty acid metabolic process
LOC105232635	22515	20061	20295	26463	21874	80637	67058	85578	97817	112992	1363.26	1278.69	1162.69	1201.73	1245.99	3198.14	2925.44	3473.3	3683.3	3346.88	1250.47	3325.41	1.41106	7.15675e-59	1.71309e-56	Argk	PREDICTED: arginine kinase isoform X1 [Bactrocera dorsalis]	Metabolism;Metabolism	Global and overview maps;Amino acid metabolism	ko01100//Metabolic pathways;ko00330//Arginine and proline metabolism	K00933;K00933	-	GO:0016772//transferase activity, transferring phosphorus-containing groups	-
LOC105224810	2101	2162	2190	2922	2446	7780	6061	8045	8291	9672	118.78	128.54	117.14	124.19	129.9	284.99	244.02	301.59	287.96	264.6	123.71	276.632	1.16101	1.06242e-58	2.49223e-56	Idh1	PREDICTED: isocitrate dehydrogenase [NADP] cytoplasmic [Bactrocera dorsalis]	Metabolism;Metabolism;Cellular Processes;Metabolism;Metabolism;Metabolism;Human Diseases;Metabolism	Global and overview maps;Global and overview maps;Transport and catabolism;Metabolism of other amino acids;Global and overview maps;Carbohydrate metabolism;Cancers;Global and overview maps	ko01100//Metabolic pathways;ko01200//Carbon metabolism;ko04146//Peroxisome;ko00480//Glutathione metabolism;ko01230//Biosynthesis of amino acids;ko00020//Citrate cycle (TCA cycle);ko05230//Central carbon metabolism in cancer;ko01210//2-Oxocarboxylic acid metabolism	K00031;K00031;K00031;K00031;K00031;K00031;K00031;K00031	-	-	-
LOC105233805	165	42	89	60	40	10804	10844	12217	13353	19228	21.37	5.72	10.9	5.84	4.87	906.47	999.95	1048.99	1062.23	1204.82	9.74	1044.49	6.74466	2.49247e-58	5.7322e-56	--	PREDICTED: uncharacterized protein LOC105233805 [Bactrocera dorsalis]	-	-	-	-	-	-	-
LOC105225607	386	192	246	554	220	2	6	11	7	10	42.81	22.39	25.81	46.19	22.92	0.14	0.47	0.81	0.48	0.54	32.024	0.488	-6.03613	1.02327e-57	2.30806e-55	--	PREDICTED: glycine-rich cell wall structural protein 2-like isoform X2 [Bactrocera dorsalis]	-	-	-	-	-	-	-
LOC105231537	7884	7508	6407	10740	8265	33358	31760	40406	41705	58006	503.1	503.86	386.83	515.26	495.43	1379.26	1443.29	1709.76	1634.96	1791.19	480.896	1591.69	1.72676	2.6814e-57	5.93398e-55	Cyp6g1	PREDICTED: LOW QUALITY PROTEIN: cytochrome P450 6g1-like [Bactrocera dorsalis]	-	-	-	-	-	GO:0016491//oxidoreductase activity;GO:0046906//tetrapyrrole binding	GO:0044710//single-organism metabolic process
LOC105226601	6785	7516	7440	11316	7407	32933	33584	43869	48745	55577	647.35	754.1	671.57	811.66	663.81	2035.85	2281.76	2775.3	2857.05	2565.83	709.698	2503.16	1.81847	2.95871e-57	6.42643e-55	to	PREDICTED: protein takeout-like [Bactrocera dorsalis]	-	-	-	-	-	-	-
LOC105232872	67	69	45	82	53	429	440	390	503	558	3.96	4.29	2.52	3.65	2.94	16.44	18.53	15.29	18.27	15.97	3.472	16.9	2.28318	4.27076e-56	9.1076e-54	-	-	-	-	-	-	-	-	-
LOC105229032	1256	985	1242	1705	1027	469	510	427	484	673	24.89	20.45	23.12	25.24	19.08	6.04	7.25	5.66	5.95	6.51	22.556	6.282	-1.84422	9.54549e-56	1.99927e-53	FBLN7	PREDICTED: fibrillin-1 isoform X1 [Bactrocera dorsalis]	-	-	-	-	GO:0031012//extracellular matrix	GO:0046872//metal ion binding	-
LOC105231611	4245	4527	5816	5315	4770	26626	19232	29527	31884	41641	353.43	396.36	458.12	332.68	373.05	1436.36	1140.26	1630.1	1630.81	1677.64	382.728	1503.03	1.97349	2.49418e-55	5.13232e-53	--	PREDICTED: protein takeout [Bactrocera dorsalis]	-	-	-	-	-	-	-
LOC105225272	551	627	584	1019	779	194	221	229	276	278	78.61	94.07	78.82	109.29	103.01	17.93	22.45	21.66	23.86	19.19	92.76	21.018	-2.14188	2.68691e-55	5.43357e-53	TpnC73F	PREDICTED: troponin C, isoform 3 [Bactrocera cucurbitae]	-	-	-	-	-	GO:0046872//metal ion binding	-
LOC105224770	853	1046	1576	1238	867	7446	8716	9888	8898	12123	32.11	41.41	56.13	35.04	30.66	181.61	233.65	246.82	205.78	220.83	39.07	217.738	2.47846	2.32931e-54	4.63058e-52	-	-	-	-	-	-	-	-	-
LOC105223629	874	857	982	1095	948	2752	2807	3269	3074	4265	34.38	35.45	36.55	32.38	35.03	70.15	78.64	85.27	74.29	81.19	34.758	77.908	1.16443	1.39643e-53	2.68503e-51	SCARB1	PREDICTED: lysosome membrane protein 2 [Bactrocera dorsalis]	-	-	-	-	GO:0031224//intrinsic component of membrane	-	-
LOC105223822	13	12	17	29	15	257	238	212	235	435	1.57	1.53	1.95	2.64	1.7	20.14	20.5	17	17.46	25.46	1.878	20.112	3.42079	2.44014e-53	4.61619e-51	SDR-1	PREDICTED: farnesol dehydrogenase-like [Bactrocera dorsalis]	Metabolism;Metabolism	Metabolism of terpenoids and polyketides;Metabolism of terpenoids and polyketides	ko00981//Insect hormone biosynthesis;ko00900//Terpenoid backbone biosynthesis	K15890;K15890	-	-	-
LOC105229550	1162	1090	1601	1564	1343	420	479	509	455	777	57.57	56.79	75.04	58.25	62.5	13.48	16.9	16.72	13.85	18.63	62.03	15.916	-1.96249	3.05867e-53	5.69448e-51	UGT2A1	PREDICTED: UDP-glucuronosyltransferase 1-6 [Bactrocera dorsalis]	Metabolism;Metabolism;Metabolism;Metabolism;Human Diseases;Metabolism;Organismal Systems;Metabolism;Metabolism;Metabolism;Metabolism	Global and overview maps;Xenobiotics biodegradation and metabolism;Xenobiotics biodegradation and metabolism;Xenobiotics biodegradation and metabolism;Cancers;Carbohydrate metabolism;Digestive system;Metabolism of cofactors and vitamins;Metabolism of cofactors and vitamins;Carbohydrate metabolism;Lipid metabolism	ko01100//Metabolic pathways;ko00983//Drug metabolism - other enzymes;ko00980//Metabolism of xenobiotics by cytochrome P450;ko00982//Drug metabolism - cytochrome P450;ko05204//Chemical carcinogenesis;ko00040//Pentose and glucuronate interconversions;ko04976//Bile secretion;ko00860//Porphyrin and chlorophyll metabolism;ko00830//Retinol metabolism;ko00053//Ascorbate and aldarate metabolism;ko00140//…	K00699;K00699;K00699;K00699;K00699;K00699;K00699;K00699;K00699;K00699;K00699	-	GO:0016757//transferase activity, transferring glycosyl groups	-
LOC105227463	254	226	283	371	252	77	84	73	69	136	6.32	5.91	6.66	6.94	5.89	1.24	1.49	1.2	1.05	1.64	6.344	1.324	-2.26049	6.0687e-53	1.11218e-50	-	-	-	-	-	-	-	-	-
LOC105226854	907	844	924	1333	773	328	301	394	364	530	32.78	32.07	31.59	36.22	26.24	7.68	7.75	9.44	8.08	9.27	31.78	8.444	-1.91212	9.63926e-52	1.73937e-49	--	PREDICTED: probable serine/threonine-protein kinase nek3 [Bactrocera dorsalis]	-	-	-	-	-	-	-
LOC105229681	128	150	183	174	241	1266	924	1341	1337	1499	15.19	18.72	20.55	15.52	26.87	97.35	78.09	105.53	97.48	86.08	19.37	92.906	2.26195	1.08865e-51	1.93466e-49	GST1	PREDICTED: glutathione S-transferase 1-like [Bactrocera dorsalis]	Human Diseases;Human Diseases;Metabolism;Organismal Systems;Human Diseases;Human Diseases;Metabolism;Metabolism;Metabolism;Human Diseases;Human Diseases	Cancers;Cancers;Xenobiotics biodegradation and metabolism;Aging;Cardiovascular diseases;Cancers;Xenobiotics biodegradation and metabolism;Metabolism of other amino acids;Xenobiotics biodegradation and metabolism;Cancers;Drug resistance	ko05200//Pathways in cancer;ko05225//Hepatocellular carcinoma;ko00983//Drug metabolism - other enzymes;ko04212//Longevity regulating pathway - worm;ko05418//Fluid shear stress and atherosclerosis;ko05215//Prostate cancer;ko00980//Metabolism of xenobiotics by cytochrome P450;ko00480//Glutathione metabolism;ko00982//Drug metabolism - cytochrome P450;ko05204//Chemical carcinogenesis;ko01524//Platinu…	K00799;K00799;K00799;K00799;K00799;K00799;K00799;K00799;K00799;K00799;K00799	-	-	-
LOC105231032	2312	2392	2926	3072	2430	7871	7781	8697	9555	12438	406.59	442.37	486.82	406.15	401.41	896.86	974.43	1014.15	1032.28	1058.44	428.668	995.232	1.21517	1.74724e-51	3.05871e-49	Obp99a	PREDICTED: general odorant-binding protein 99a [Bactrocera dorsalis]	-	-	-	-	-	-	-
LOC105227008	821	1015	850	1011	891	3456	3088	3696	3694	5266	36.3	47.2	35.56	33.61	37.01	99.02	97.24	108.37	100.35	112.68	37.936	103.532	1.44844	1.04225e-50	1.77167e-48	Alp4	PREDICTED: alkaline phosphatase 4 [Bactrocera dorsalis]	Metabolism;Metabolism;Metabolism	Global and overview maps;Metabolism of cofactors and vitamins;Metabolism of cofactors and vitamins	ko01100//Metabolic pathways;ko00790//Folate biosynthesis;ko00730//Thiamine metabolism	K01077;K01077;K01077	-	GO:0016791//phosphatase activity	GO:0006796//phosphate-containing compound metabolic process
LOC105224951	54	20	35	39	52	445	467	583	515	814	3.37	1.31	2.07	1.83	3.05	18.01	20.77	24.15	19.76	24.61	2.326	21.46	3.20573	2.56389e-50	4.29599e-48	-	-	-	-	-	-	-	-	-
LOC105232645	59	76	54	79	65	488	350	466	560	545	3.55	4.81	3.07	3.57	3.67	19.03	15	18.59	20.7	15.87	3.734	17.838	2.25616	1.04152e-49	1.72057e-47	vanin-like	PREDICTED: vanin-like protein 1 [Bactrocera dorsalis]	Metabolism;Organismal Systems;Metabolism	Global and overview maps;Digestive system;Metabolism of cofactors and vitamins	ko01100//Metabolic pathways;ko04977//Vitamin digestion and absorption;ko00780//Biotin metabolism	K01435;K01435;K01435	-	-	-
MSTRG.2081	6762	6105	6907	9713	6174	828	1064	1821	869	1522	1470.68	1396.32	1421.22	1588.07	1261.33	116.68	164.79	262.62	116.11	160.18	1427.52	164.076	-3.12108	1.28813e-49	2.09841e-47	--	-	-	-	-	-	-	-	-
LOC105223592	136	126	132	197	150	6	20	12	4	17	1.09	1.07	1	1.19	1.13	0.03	0.11	0.06	0.02	0.07	1.096	0.058	-4.24005	1.70602e-49	2.74108e-47	ds	PREDICTED: protein dachsous [Bactrocera dorsalis]	Environmental Information Processing;Environmental Information Processing	Signal transduction;Signal transduction	ko04391//Hippo signaling pathway -fly;ko04392//Hippo signaling pathway - multiple species	K16507;K16507	-	-	-
LOC105232493	3396	2704	2888	4183	3008	795	760	1132	1059	1615	213.7	178.43	171.41	198.76	177.84	31.55	33.29	46.46	39.66	48.02	188.028	39.796	-2.24025	3.37711e-49	5.35272e-47	--	gasp, isoform A [Drosophila melanogaster]	-	-	-	-	-	GO:0097367//carbohydrate derivative binding	GO:0006022//aminoglycan metabolic process
LOC105225695	235	257	283	301	220	1533	1655	1475	1478	3182	43.33	49.83	49.37	41.72	38.1	183.14	217.3	180.33	167.41	283.9	44.47	206.416	2.21465	5.85837e-49	9.16171e-47	--	PREDICTED: glycine-rich cell wall structural protein-like, partial [Bactrocera dorsalis]	-	-	-	-	-	-	-
LOC105227684	42	38	42	48	53	270	278	321	286	471	6	5.71	5.68	5.13	7.11	24.99	28.26	30.41	25.07	32.56	5.926	28.258	2.25353	1.27095e-47	1.93598e-45	--	PREDICTED: uncharacterized protein LOC105227684 [Bactrocera dorsalis]	-	-	-	-	-	GO:0016740//transferase activity	GO:0006796//phosphate-containing compound metabolic process
LOC105223413	326	239	301	502	356	111	81	108	81	110	5.74	4.43	5.02	6.65	5.89	1.27	1.02	1.26	0.88	0.94	5.546	1.074	-2.36845	3.44754e-47	5.18413e-45	CDH23	Cadherin-23, partial [Bactrocera dorsalis]	-	-	-	-	GO:0031224//intrinsic component of membrane	-	GO:0098742//cell-cell adhesion via plasma-membrane adhesion molecules
LOC105229288	5045	5668	5643	6937	5256	3350	3086	3639	3084	4022	458.75	542	485.46	474.22	448.94	197.37	199.83	219.41	172.28	176.97	481.874	193.172	-1.31877	1.16243e-46	1.72584e-44	EIF4EBP1	PREDICTED: eukaryotic translation initiation factor 4E-binding protein 3 [Bactrocera dorsalis]	Genetic Information Processing;Organismal Systems	Translation;Aging	ko03013//RNA transport;ko04213//Longevity regulating pathway - multiple species	K18644;K18644	-	-	GO:0006446//regulation of translational initiation
LOC105228945	120	88	145	105	126	688	730	673	732	1185	4.31	3.32	4.92	2.83	4.25	16	18.66	16.02	16.14	20.58	3.926	17.48	2.15457	2.5517e-46	3.7411e-44	Sardh	PREDICTED: sarcosine dehydrogenase, mitochondrial [Bactrocera dorsalis]	Metabolism;Metabolism	Global and overview maps;Amino acid metabolism	ko01100//Metabolic pathways;ko00260//Glycine, serine and threonine metabolism	K00314;K00314	-	-	GO:0044710//single-organism metabolic process
LOC105222598	8141	7996	7046	11510	8643	29484	28302	35440	39226	51079	912.34	942.31	747.01	969.67	909.78	2140.75	2258.56	2633.44	2700.44	2769.78	896.222	2500.59	1.48034	1.02099e-45	1.47842e-43	Cyp6g1	PREDICTED: cytochrome P450 6g1-like [Bactrocera dorsalis]	-	-	-	-	-	GO:0016491//oxidoreductase activity;GO:0046906//tetrapyrrole binding	GO:0044710//single-organism metabolic process
LOC105229898	25	29	15	13	11	380	397	271	418	494	2	2.27	1.01	1.11	1.31	20.72	22.72	14.8	20.55	19.57	1.54	19.672	3.67514	1.2052e-45	1.72388e-43	CCHa2	PREDICTED: neuropeptide CCHamide-2 isoform X1 [Bactrocera dorsalis]	-	-	-	-	-	-	-
LOC105222986	158	178	182	358	232	13	20	19	8	39	3.8	4.5	4.14	6.47	5.24	0.2	0.34	0.3	0.12	0.45	4.83	0.282	-4.09826	1.68647e-45	2.3832e-43	CHIA	Acidic mammalian chitinase [Bactrocera dorsalis]	Metabolism;Metabolism	Global and overview maps;Carbohydrate metabolism	ko01100//Metabolic pathways;ko00520//Amino sugar and nucleotide sugar metabolism	K01183;K01183	-	GO:0004553//hydrolase activity, hydrolyzing O-glycosyl compounds;GO:0097367//carbohydrate derivative binding	GO:0006026//aminoglycan catabolic process;GO:0044238//primary metabolic process
LOC105232281	88	106	85	173	109	4	5	5	4	5	3.35	4.25	3.05	4.98	3.91	0.1	0.14	0.13	0.09	0.09	3.908	0.11	-5.15086	1.74272e-45	2.43338e-43	--	PREDICTED: skin secretory protein xP2 isoform X1 [Bactrocera dorsalis]	-	-	-	-	-	-	-
LOC105230162	261	187	287	302	270	93	77	70	62	115	15.96	12.02	16.6	13.88	15.51	3.68	3.35	2.84	2.33	3.4	14.794	3.12	-2.24539	1.22568e-44	1.69129e-42	FMOGS-OX5	PREDICTED: flavin-containing monooxygenase FMO GS-OX5 [Bactrocera dorsalis]	-	-	-	-	GO:0043231//intracellular membrane-bounded organelle;GO:0044444//cytoplasmic part	GO:0000166//nucleotide binding;GO:0016709//oxidoreductase activity, acting on paired donors, with incorporation or reduction of molecular oxygen, NAD(P)H as one donor, and incorporation of one atom of oxygen	GO:0044710//single-organism metabolic process
LOC105228524	746	663	994	1007	867	2605	2555	2808	3120	3763	30.89	28.86	38.89	31.32	33.68	69.87	75.28	77.06	79.33	75.38	32.728	75.384	1.20373	1.15746e-43	1.57859e-41	Abcg1	PREDICTED: ATP-binding cassette sub-family G member 4 [Bactrocera dorsalis]	-	-	-	-	GO:0043234//protein complex	GO:0015405//P-P-bond-hydrolysis-driven transmembrane transporter activity;GO:0017111//nucleoside-triphosphatase activity;GO:0032550//purine ribonucleoside binding	GO:0006897//endocytosis
LOC105230298	173	136	189	189	143	770	661	797	919	1321	9.56	7.9	9.88	7.85	7.42	27.56	26.01	29.2	31.19	35.31	8.522	29.854	1.80866	2.18248e-43	2.94234e-41	--	PREDICTED: arrestin domain-containing protein 5 [Ceratitis capitata]	-	-	-	-	-	-	-
LOC105224549	390	257	232	588	321	50	22	27	49	67	31.44	21.79	17.69	35.64	24.31	2.61	1.26	1.44	2.43	2.61	26.174	2.07	-3.66043	4.46554e-43	5.95185e-41	--	PREDICTED: pro-resilin [Bactrocera dorsalis]	-	-	-	-	-	GO:0005214//structural constituent of chitin-based cuticle	GO:0042335//cuticle development
LOC105230320	2408	1701	2206	2388	2392	7539	7767	7795	9207	11590	126.79	94.19	109.89	94.53	118.31	257.2	291.23	272.15	297.82	295.3	108.742	282.74	1.37857	9.56381e-43	1.26038e-40	B1	PREDICTED: esterase B1 [Bactrocera dorsalis]	-	-	-	-	-	-	-
LOC105226235	561	493	606	855	661	2438	2079	2130	2438	2347	29.09	26.89	29.73	33.33	32.2	81.92	76.78	73.24	77.67	58.9	30.248	73.702	1.28486	2.08759e-42	2.72059e-40	Slc17a5	PREDICTED: LOW QUALITY PROTEIN: putative inorganic phosphate cotransporter [Bactrocera dorsalis]	-	-	-	-	-	-	-
LOC105227781	11	7	19	21	22	197	269	366	362	374	0.5	0.33	0.82	0.72	0.94	5.79	8.69	11.02	10.09	8.21	0.662	8.76	3.72603	2.54076e-42	3.27479e-40	PPO2	PREDICTED: phenoloxidase 2-like [Bactrocera dorsalis]	-	-	-	-	-	-	-
LOC105225316	1163	948	1121	1321	1004	130	211	198	342	321	107.96	92.55	98.45	92.19	87.55	7.82	13.95	12.19	19.5	14.42	95.74	13.576	-2.81806	4.19697e-42	5.34214e-40	--	Peritrophin-1 [Ceratitis capitata]	-	-	-	-	-	GO:0097367//carbohydrate derivative binding	GO:0006022//aminoglycan metabolic process
LOC105228298	1038	859	992	1241	1164	3382	3136	4211	3702	4954	99.75	86.81	90.19	89.66	105.07	210.58	214.6	268.32	218.55	230.36	94.296	228.482	1.27681	4.23581e-42	5.34214e-40	GSTT1	PREDICTED: glutathione S-transferase theta-1 [Bactrocera dorsalis]	Human Diseases;Human Diseases;Metabolism;Organismal Systems;Human Diseases;Human Diseases;Metabolism;Metabolism;Metabolism;Human Diseases;Human Diseases	Cancers;Cancers;Xenobiotics biodegradation and metabolism;Aging;Cardiovascular diseases;Cancers;Xenobiotics biodegradation and metabolism;Metabolism of other amino acids;Xenobiotics biodegradation and metabolism;Cancers;Drug resistance	ko05200//Pathways in cancer;ko05225//Hepatocellular carcinoma;ko00983//Drug metabolism - other enzymes;ko04212//Longevity regulating pathway - worm;ko05418//Fluid shear stress and atherosclerosis;ko05215//Prostate cancer;ko00980//Metabolism of xenobiotics by cytochrome P450;ko00480//Glutathione metabolism;ko00982//Drug metabolism - cytochrome P450;ko05204//Chemical carcinogenesis;ko01524//Platinu…	K00799;K00799;K00799;K00799;K00799;K00799;K00799;K00799;K00799;K00799;K00799	-	GO:0003824//catalytic activity	-
LOC105232755	106	99	86	175	116	1	5	5	1	11	5	4.9	3.93	6	5.35	0.03	0.18	0.13	0.03	0.23	5.036	0.12	-5.39117	4.47485e-42	5.58356e-40	l(3)mbn	Protein lethal(3)malignant blood neoplasm 1, partial [Bactrocera dorsalis]	-	-	-	-	-	-	-
LOC105224724	1136	1044	1118	1773	1084	3798	4194	4486	4766	6658	72.23	69.81	67.26	84.76	64.75	156.48	189.91	189.14	186.17	204.86	71.762	185.312	1.36866	8.20454e-42	1.01296e-39	PLB1	PREDICTED: LOW QUALITY PROTEIN: phospholipase B1, membrane-associated [Bactrocera dorsalis]	-	-	-	-	-	GO:0016787//hydrolase activity	GO:0006897//endocytosis
LOC105232911	11	26	23	25	15	329	395	478	1041	874	2.29	5.68	4.52	3.9	2.93	44.28	58.43	65.84	132.85	87.86	3.864	77.852	4.33257	9.92153e-41	1.19969e-38	--	GH15280 [Drosophila grimshawi]	-	-	-	-	-	-	-
LOC105227401	213	213	221	328	245	74	69	86	97	147	5.8	6.1	5.7	6.72	6.27	1.31	1.34	1.55	1.62	1.94	6.118	1.552	-1.97893	3.21108e-40	3.84314e-38	rt	PREDICTED: protein O-mannosyltransferase 1 [Bactrocera dorsalis]	Metabolism;Metabolism;Metabolism	Global and overview maps;Glycan biosynthesis and metabolism;Glycan biosynthesis and metabolism	ko01100//Metabolic pathways;ko00514//Other types of O-glycan biosynthesis;ko00515//Mannose type O-glycan biosyntheis	K00728;K00728;K00728	-	GO:0016740//transferase activity	GO:0006486//protein glycosylation
LOC105230478	260	216	319	339	273	1085	878	934	886	1461	4.47	3.9	5.19	4.38	4.41	12.08	10.74	10.64	9.35	12.15	4.47	10.992	1.29811	5.60522e-40	6.64077e-38	Npr1	PREDICTED: atrial natriuretic peptide receptor 1 isoform X1 [Bactrocera dorsalis]	Organismal Systems;Metabolism;Environmental Information Processing;Organismal Systems;Environmental Information Processing;Organismal Systems;Organismal Systems;Organismal Systems;Organismal Systems	Environmental adaptation;Nucleotide metabolism;Signal transduction;Endocrine system;Signal transduction;Circulatory system;Endocrine system;Endocrine system;Endocrine system	ko04714//Thermogenesis;ko00230//Purine metabolism;ko04024//cAMP signaling pathway;ko04921//Oxytocin signaling pathway;ko04022//cGMP - PKG signaling pathway;ko04270//Vascular smooth muscle contraction;ko04925//Aldosterone synthesis and secretion;ko04924//Renin secretion;ko04923//Regulation of lipolysis in adipocyte	K12323;K12323;K12323;K12323;K12323;K12323;K12323;K12323;K12323	GO:0031224//intrinsic component of membrane	GO:0009975//cyclase activity;GO:0016301//kinase activity;GO:0016829//lyase activity;GO:0032550//purine ribonucleoside binding	GO:0006464//cellular protein modification process;GO:0007165//signal transduction;GO:0009152//purine ribonucleotide biosynthetic process
LOC105229523	745	862	616	874	652	3188	2905	3522	3607	4047	28.27	34.4	22.12	24.94	23.24	78.39	78.51	88.63	84.1	74.32	26.594	80.79	1.60308	8.00323e-40	9.29404e-38	--	PREDICTED: uncharacterized protein LOC105229523 [Bactrocera dorsalis]	-	-	-	-	-	-	-
LOC105222247	834	974	1001	1181	1150	4462	2939	4404	4369	4705	65.74	80.74	74.65	69.99	85.15	227.89	164.97	230.18	211.57	179.46	75.254	202.814	1.43032	1.03154e-39	1.18617e-37	cahz	PREDICTED: carbonic anhydrase [Bactrocera dorsalis]	Metabolism	Energy metabolism	ko00910//Nitrogen metabolism	K01672	GO:0044424//intracellular part	GO:0016836//hydro-lyase activity;GO:0046914//transition metal ion binding	GO:0044237//cellular metabolic process
LOC105231082	84	59	129	65	99	710	719	665	914	1118	5.14	3.79	7.46	2.99	5.69	28.13	31.31	26.96	34.33	33.08	5.014	30.762	2.61712	5.06791e-39	5.77102e-37	-	-	-	-	-	-	-	-	-
LOC105232389	20	25	41	17	26	262	338	308	447	449	2.2	2.89	4.26	1.4	2.68	18.63	26.42	22.41	30.14	23.85	2.686	24.29	3.17683	1.03235e-38	1.16427e-36	--	PREDICTED: uncharacterized protein LOC105232389 [Bactrocera dorsalis]	-	-	-	-	-	-	-
LOC105222926	24274	26259	23067	33687	29786	102161	70463	98262	91459	112399	993.97	1131.43	893.81	1037.18	1146.07	2713.2	2056.57	2670.86	2302.92	2229.32	1040.49	2394.57	1.2025	1.23902e-38	1.38404e-36	Gdh	PREDICTED: glutamate dehydrogenase, mitochondrial isoform X1 [Bactrocera dorsalis]	Metabolism;Metabolism;Cellular Processes;Metabolism;Metabolism;Metabolism;Organismal Systems;Metabolism	Global and overview maps;Global and overview maps;Cell growth and death;Amino acid metabolism;Energy metabolism;Amino acid metabolism;Excretory system;Metabolism of other amino acids	ko01100//Metabolic pathways;ko01200//Carbon metabolism;ko04217//Necroptosis;ko00250//Alanine, aspartate and glutamate metabolism;ko00910//Nitrogen metabolism;ko00220//Arginine biosynthesis;ko04964//Proximal tubule bicarbonate reclamation;ko00471//D-Glutamine and D-glutamate metabolism	K00261;K00261;K00261;K00261;K00261;K00261;K00261;K00261	-	GO:0003824//catalytic activity	GO:0044710//single-organism metabolic process
LOC105232634	465	406	544	645	549	1509	1505	1541	1398	1871	14.26	13.15	15.82	14.85	15.63	30.04	32.64	31.36	26.32	27.71	14.742	29.614	1.00635	1.36036e-38	1.50525e-36	Ano1	PREDICTED: anoctamin-5 isoform X1 [Bactrocera dorsalis]	-	-	-	-	GO:0031224//intrinsic component of membrane	-	-
LOC105233877	1856	1843	1941	2883	2011	1018	1112	1152	1246	1840	118.87	124.13	117.61	138.81	120.98	42.24	50.72	48.92	49.02	57.02	124.08	49.584	-1.32332	1.6003e-38	1.7542e-36	-	-	-	-	-	-	-	-	-
LOC105234004	352	221	397	363	300	101	88	107	84	128	8.1	5.35	8.64	6.28	6.48	1.51	1.44	1.63	1.19	1.43	6.97	1.44	-2.27509	4.77792e-38	5.1413e-36	-	-	-	-	-	-	-	-	-
LOC105231592	58	53	45	55	45	297	317	358	278	391	1.69	1.63	1.24	1.21	1.23	5.62	6.59	6.93	4.98	5.52	1.4	5.928	2.08212	9.48981e-38	1.00276e-35	4CL3	Luciferin 4-monooxygenase [Bactrocera dorsalis]	-	-	-	-	-	-	-
LOC105222062	1054	905	1064	1348	1009	3045	2661	3144	3630	4851	44.99	41.51	43.11	44.43	40.86	83.49	81.68	89.44	94.79	100.79	42.98	90.038	1.06687	1.72192e-37	1.80325e-35	CHST11	PREDICTED: carbohydrate sulfotransferase 11 [Bactrocera dorsalis]	Metabolism	Glycan biosynthesis and metabolism	ko00532//Glycosaminoglycan biosynthesis - chondroitin sulfate / dermatan sulfate	K01017	GO:0031224//intrinsic component of membrane	GO:0016782//transferase activity, transferring sulfur-containing groups	GO:0044711//single-organism biosynthetic process
LOC105224985	229	189	163	364	213	1326	1499	1562	2595	3077	16.69	14.49	11.24	19.95	14.58	62.63	77.81	75.5	116.21	108.53	15.39	88.136	2.51774	3.35756e-37	3.48503e-35	--	PREDICTED: pro-resilin-like [Bactrocera oleae]	-	-	-	-	-	-	-
LOC105233201	1780	1850	1848	2443	1943	1160	1132	1386	1204	1406	68.39	74.66	67.22	70.63	70.17	28.97	30.97	35.29	28.39	26.24	70.214	29.972	-1.22814	9.05827e-37	9.31969e-35	CG42265	PREDICTED: otopetrin-2 isoform X1 [Bactrocera dorsalis]	-	-	-	-	-	-	-
LOC105233399	286	244	283	347	279	82	101	123	103	98	39.13	35.1	36.63	35.69	35.85	7.27	9.84	11.16	8.66	6.49	36.48	8.684	-2.07067	1.13271e-36	1.15526e-34	--	GL16604 [Drosophila persimilis]	-	-	-	-	-	-	-
LOC105225512	15075	18185	16663	24538	15849	53139	58991	67455	74986	88493	2237.55	2838.46	2339.9	2738.1	2209.71	5110.41	6235.21	6638.89	6837.48	6355.81	2472.74	6235.56	1.33441	1.89522e-36	1.9163e-34	EbpIII	PREDICTED: ejaculatory bulb-specific protein 3 [Bactrocera dorsalis]	-	-	-	-	-	-	-
LOC105232700	17	22	17	15	19	163	144	177	224	227	3.25	4.43	3.08	2.16	3.41	20.21	19.62	22.46	26.33	21.02	3.266	21.928	2.74718	2.34471e-36	2.35052e-34	--	GL15427 [Drosophila persimilis]	-	-	-	-	-	-	-
LOC105222881	611	699	664	894	764	2883	2111	2450	2167	2722	20.15	24.24	20.71	22.16	23.66	61.59	49.57	53.57	43.9	43.43	22.184	50.412	1.18425	6.28917e-36	6.25133e-34	dor	PREDICTED: vacuolar protein sorting-associated protein 18 homolog [Bactrocera dorsalis]	-	-	-	-	-	GO:0046914//transition metal ion binding	GO:0006810//transport
LOC105224839	80	108	105	262	140	8	6	7	2	2	13.98	18.6	17.29	33.21	22.23	0.92	0.7	0.83	0.22	0.17	21.062	0.568	-5.21261	6.74126e-36	6.64439e-34	--	PREDICTED: pupal cuticle protein G1A-like isoform X1 [Bactrocera dorsalis]	-	-	-	-	-	-	-
LOC105221991	648	614	1087	783	723	223	230	220	232	402	51.88	51.7	82.34	47.13	54.38	11.57	13.11	11.68	11.41	15.58	57.486	12.67	-2.18179	1.03858e-35	1.01512e-33	E(spl)mbeta-HLH	PREDICTED: enhancer of split mbeta protein [Bactrocera dorsalis]	-	-	-	-	GO:0043231//intracellular membrane-bounded organelle	GO:0005515//protein binding	GO:0010468//regulation of gene expression;GO:0034645//cellular macromolecule biosynthetic process
LOC105228331	5718	5552	6378	8124	5503	17082	17172	21347	22869	28443	224.86	229.6	237.29	240.18	203.28	435.25	480.89	556.64	552.48	541.24	227.042	513.3	1.17684	1.50778e-35	1.46155e-33	-	-	-	-	-	-	-	-	-
LOC105226135	472	399	943	593	556	3436	4134	4520	4700	6358	36.21	32.19	68.45	34.2	40.07	170.81	225.87	229.95	221.53	236.05	42.224	216.842	2.36051	2.41975e-35	2.32633e-33	miox	PREDICTED: inositol oxygenase [Bactrocera dorsalis]	Metabolism;Metabolism	Carbohydrate metabolism;Carbohydrate metabolism	ko00562//Inositol phosphate metabolism;ko00053//Ascorbate and aldarate metabolism	K00469;K00469	GO:0044424//intracellular part	GO:0016701//oxidoreductase activity, acting on single donors with incorporation of molecular oxygen	GO:0006020//inositol metabolic process
LOC105221803	986	1229	1160	1432	1071	3254	3454	3461	4285	5205	62.32	81.69	69.37	68.05	63.59	133.27	155.47	145.06	166.39	159.2	69.004	151.878	1.13816	3.82424e-35	3.64671e-33	y	PREDICTED: protein yellow [Bactrocera dorsalis]	-	-	-	-	-	-	-
LOC105223676	153	118	159	143	98	733	684	771	642	1181	13	10.55	12.78	9.14	7.82	40.36	41.4	43.45	33.52	48.57	10.658	41.46	1.95978	6.96043e-35	6.58378e-33	Yp3	PREDICTED: vitellogenin-3-like [Bactrocera dorsalis]	-	-	-	-	-	GO:0016788//hydrolase activity, acting on ester bonds	-
LOC105226392	559	501	563	803	545	161	202	108	152	312	11.29	10.64	10.75	12.19	10.34	2.11	2.9	1.45	1.89	3.05	11.042	2.28	-2.2759	1.55754e-34	1.46147e-32	--	PREDICTED: protein artichoke [Bactrocera dorsalis]	-	-	-	-	-	-	-
LOC109579331	98	102	117	132	132	32	35	33	33	57	4.95	5.42	5.59	5.01	6.26	1.05	1.26	1.1	1.02	1.39	5.446	1.164	-2.22611	2.11026e-34	1.96439e-32	--	PREDICTED: mucin-5AC-like [Bactrocera dorsalis]	Metabolism;Metabolism	Global and overview maps;Carbohydrate metabolism	ko01100//Metabolic pathways;ko00520//Amino sugar and nucleotide sugar metabolism	K01183;K01183	-	GO:0097367//carbohydrate derivative binding	GO:0006022//aminoglycan metabolic process
LOC105229031	897	627	831	977	734	2545	2757	3012	3264	4392	75.99	55.86	66.6	62.22	58.41	139.69	166.32	169.19	169.87	180.04	63.816	165.022	1.37067	2.32832e-34	2.1503e-32	Hsp27	PREDICTED: heat shock protein 27 [Bactrocera dorsalis]	-	-	-	-	-	-	-
LOC105231669	219	153	192	282	178	79	48	57	55	95	13.33	9.74	11.05	12.91	10.18	3.11	2.14	2.31	2.1	2.8	11.442	2.492	-2.19896	2.43374e-34	2.2301e-32	--	PREDICTED: uncharacterized protein LOC105231668 [Bactrocera dorsalis]	-	-	-	-	-	-	-
LOC105233874	107	101	89	198	110	5	18	11	14	9	9.42	9.35	7.42	13.11	9.1	0.29	1.13	0.64	0.76	0.38	9.68	0.64	-3.91886	2.84976e-34	2.59107e-32	LCP22	PREDICTED: endocuticle structural glycoprotein ABD-4 [Bactrocera dorsalis]	-	-	-	-	-	-	-
LOC105232277	1861	2049	3017	2959	3153	10129	8494	9149	9043	14048	90.31	104.57	138.52	107.96	143.73	318.49	293.54	294.41	269.6	329.89	117.018	301.186	1.36392	4.20783e-34	3.79643e-32	Ance	PREDICTED: angiotensin-converting enzyme [Bactrocera dorsalis]	Human Diseases;Organismal Systems;Human Diseases;Organismal Systems	Infectious diseases;Endocrine system;Cardiovascular diseases;Endocrine system	ko05142//Chagas disease (American trypanosomiasis);ko04924//Renin secretion;ko05410//Hypertrophic cardiomyopathy (HCM);ko04614//Renin-angiotensin system	K01283;K01283;K01283;K01283	-	GO:0008238//exopeptidase activity;GO:0043169//cation binding	GO:0019538//protein metabolic process
LOC105232731	167	195	139	279	203	56	20	41	41	40	22.16	27.22	17.45	27.84	25.31	4.82	1.89	3.61	3.34	2.57	23.996	3.246	-2.88606	9.82712e-34	8.73634e-32	--	PREDICTED: endocuticle structural glycoprotein SgAbd-5 [Bactrocera dorsalis]	-	-	-	-	-	-	-
LOC105230951	3817	3948	3805	4165	4703	2165	1970	2115	1818	1997	100.56	109.96	95.1	82.68	117.25	37.33	37.25	37.13	29.4	25.62	101.11	33.346	-1.60034	9.83201e-34	8.73634e-32	XDH	PREDICTED: xanthine dehydrogenase-like [Bactrocera dorsalis]	Metabolism;Metabolism;Metabolism;Cellular Processes;Metabolism	Global and overview maps;Nucleotide metabolism;Xenobiotics biodegradation and metabolism;Transport and catabolism;Biosynthesis of other secondary metabolites	ko01100//Metabolic pathways;ko00230//Purine metabolism;ko00983//Drug metabolism - other enzymes;ko04146//Peroxisome;ko00232//Caffeine metabolism	K00106;K00106;K00106;K00106;K00106	-	GO:0000166//nucleotide binding;GO:0016616//oxidoreductase activity, acting on the CH-OH group of donors, NAD or NADP as acceptor;GO:0016726//oxidoreductase activity, acting on CH or CH2 groups, NAD or NADP as acceptor;GO:0016727//oxidoreductase activity, acting on CH or CH2 groups, oxygen as acceptor;GO:0046914//transition metal ion binding;GO:0050662//coenzyme binding;GO:0051536//iron-sulfur clu…	GO:0006259//DNA metabolic process;GO:0044710//single-organism metabolic process
LOC105225678	185	167	286	255	210	48	54	74	44	83	6.5	6.17	9.5	6.73	6.93	1.09	1.35	1.72	0.95	1.41	7.166	1.304	-2.45822	2.32623e-33	2.05145e-31	BMP8A	PREDICTED: inhibin beta A chain [Bactrocera dorsalis]	-	-	-	-	-	GO:0005102//receptor binding	-
LOC105233118	108	88	56	137	93	2	8	7	8	6	18.65	15.98	9.15	17.79	15.09	0.22	0.98	0.8	0.85	0.5	15.332	0.67	-4.51624	2.4924e-33	2.1816e-31	--	PREDICTED: uncharacterized protein LOC105233118 [Bactrocera dorsalis]	-	-	-	-	-	-	-
LOC105228590	13	17	22	13	11	265	220	155	366	529	2.57	3.53	4.12	1.93	2.04	33.95	30.98	20.32	44.46	50.61	2.838	36.064	3.66761	3.43073e-33	2.95875e-31	--	PREDICTED: uncharacterized protein LOC105228590 [Bactrocera dorsalis]	-	-	-	-	-	-	-
LOC105223147	50	54	53	78	75	263	231	295	284	415	2.54	2.89	2.55	2.98	3.59	8.67	8.37	9.96	8.88	10.22	2.91	9.22	1.66375	4.65013e-33	3.98112e-31	--	Thymic stromal cotransporter [Ceratitis capitata]	-	-	-	-	GO:0031224//intrinsic component of membrane	-	GO:0044763//single-organism cellular process
LOC105231635	4244	4480	5821	9005	4772	21512	26008	22498	29858	45664	597.47	663.25	775.3	953.06	631.05	1962.24	2607.36	2100.17	2582.29	3110.74	724.026	2472.56	1.77189	3.09459e-32	2.63018e-30	Obp19d	PREDICTED: general odorant-binding protein 19d [Bactrocera dorsalis]	-	-	-	-	-	-	-
LOC105232427	7243	6523	6641	7552	5200	23615	26745	32927	37989	45318	599.3	567.58	519.86	469.77	404.15	1266.02	1575.86	1806.52	1931	1814.43	512.132	1678.77	1.71281	4.68317e-32	3.95172e-30	--	Circadian clock-controlled protein [Bactrocera dorsalis]	-	-	-	-	-	-	-
LOC105221864	81	62	168	140	144	1008	1492	1195	2249	3867	12.98	10.45	25.47	16.87	21.68	104.67	170.27	126.98	221.42	299.9	17.49	184.648	3.40018	6.29213e-32	5.27146e-30	--	PREDICTED: general odorant-binding protein 56d-like [Bactrocera dorsalis]	-	-	-	-	-	-	-
LOC105228495	893	859	1048	995	887	125	204	264	305	374	97.81	98.94	108.6	81.93	91.26	8.87	15.91	19.17	20.52	19.82	95.708	16.858	-2.50521	7.02698e-32	5.84535e-30	Dh31	PREDICTED: diuretic hormone class 2 [Bactrocera dorsalis]	-	-	-	-	-	-	-
LOC105231042	99	28	21	14	17	5375	7808	4316	10428	11958	14.49	4.31	2.91	1.54	2.34	509.82	813.95	418.94	937.8	847.06	5.118	705.514	7.10695	9.51331e-32	7.85786e-30	--	PREDICTED: general odorant-binding protein 99a-like [Bactrocera dorsalis]	-	-	-	-	-	-	-
LOC105224317	180	167	232	261	225	629	616	739	803	1067	17.14	16.43	20.58	18.37	19.96	39.08	42.22	46.96	47.52	49.72	18.496	45.1	1.28591	1.02942e-31	8.44338e-30	RGN	PREDICTED: regucalcin isoform X1 [Bactrocera dorsalis]	-	-	-	-	-	-	-
LOC105230183	560	483	681	764	531	1901	2065	2153	2781	3773	29.99	27.2	34.5	30.76	26.71	65.96	78.75	76.45	91.49	97.77	29.832	82.084	1.46024	2.20748e-31	1.78802e-29	DHRSX	PREDICTED: dehydrogenase/reductase SDR family member on chromosome X [Bactrocera dorsalis]	-	-	-	-	-	GO:0003824//catalytic activity	GO:0044710//single-organism metabolic process
LOC105229626	263	218	350	272	241	1377	1054	1884	1851	2467	25.36	22.11	31.94	19.72	21.83	86.05	72.39	120.48	109.67	115.13	24.192	100.744	2.05809	2.67513e-31	2.14908e-29	FGL2	Ficolin-1, partial [Bactrocera dorsalis]	-	-	-	-	-	-	-
LOC105233939	328	367	337	601	413	1227	1403	1672	1620	2058	36.26	42.67	35.25	49.95	42.89	87.89	110.45	122.56	110.02	110.09	41.404	108.202	1.38589	3.86615e-31	3.06392e-29	-	-	-	-	-	-	-	-	-
LOC105222701	82	65	71	101	51	8	9	7	7	12	1.76	1.47	1.44	1.66	1.03	0.11	0.14	0.1	0.09	0.12	1.472	0.112	-3.71621	5.35206e-31	4.21304e-29	--	PREDICTED: probable serine/threonine-protein kinase nek3 [Bactrocera dorsalis]	-	-	-	-	-	-	-
LOC105223192	4536	6084	5510	9511	5739	26462	21037	21958	23346	43913	123.69	174.09	141.84	194.63	146.45	465.81	406.98	395.51	391.64	580.51	156.14	448.09	1.52095	3.00508e-30	2.34978e-28	CG4928	PREDICTED: UNC93-like protein isoform X1 [Bactrocera dorsalis]	-	-	-	-	GO:0016020//membrane	-	GO:0044763//single-organism cellular process
LOC105222791	1849	1940	3023	3003	2048	1063	1174	1155	1096	1227	159.43	175.9	246.6	194.66	165.87	59.39	72.08	66.03	58.05	51.19	188.492	61.348	-1.61942	7.11899e-30	5.52971e-28	--	PREDICTED: sepiapterin reductase [Bactrocera dorsalis]	Metabolism;Metabolism	Global and overview maps;Metabolism of cofactors and vitamins	ko01100//Metabolic pathways;ko00790//Folate biosynthesis	K00072;K00072	-	-	-
LOC105228565	423	239	592	330	377	58	38	79	84	82	77.32	45.94	102.38	45.35	64.73	6.87	4.95	9.58	9.43	7.25	67.144	7.616	-3.14015	7.75897e-30	5.98717e-28	--	Serine protease persephone [Ceratitis capitata]	-	-	-	-	-	-	-
LOC105230418	767	821	571	832	606	2867	3147	4343	4412	6285	137.61	154.9	96.92	112.22	102.13	333.28	402.07	516.67	486.28	545.64	120.756	456.788	1.91943	1.59464e-29	1.21451e-27	--	PREDICTED: venom peptide HsVx1-like [Ceratitis capitata]	-	-	-	-	-	-	-
LOC115066547	155	110	107	160	139	465	415	458	484	626	6.55	4.89	4.28	5.08	5.52	12.73	12.48	12.83	12.56	12.8	5.264	12.68	1.26832	1.79921e-29	1.36148e-27	nep-21	PREDICTED: membrane metallo-endopeptidase-like 1 [Bactrocera latifrons]	-	-	-	-	-	-	-
LOC105225894	12776	15288	15843	24004	16437	9844	10284	10222	9929	15998	489.87	616.68	574.62	691.82	592.29	244.64	280.9	259.91	234.1	296.8	593.056	263.27	-1.17163	2.69026e-29	2.02269e-27	--	PREDICTED: uncharacterized abhydrolase domain-containing protein DDB_G0269086 [Bactrocera dorsalis]	-	-	-	-	-	-	-
LOC105222327	272	184	312	312	278	895	1091	1153	1254	1803	21.04	14.96	22.83	18.14	20.2	44.85	60.08	59.13	59.58	67.47	19.434	58.222	1.58298	2.71337e-29	2.02708e-27	GLO5	PREDICTED: peroxisomal (S)-2-hydroxy-acid oxidase GLO5 [Bactrocera dorsalis]	Metabolism;Metabolism;Cellular Processes;Metabolism	Global and overview maps;Global and overview maps;Transport and catabolism;Carbohydrate metabolism	ko01100//Metabolic pathways;ko01200//Carbon metabolism;ko04146//Peroxisome;ko00630//Glyoxylate and dicarboxylate metabolism	K11517;K11517;K11517;K11517	-	GO:0003824//catalytic activity;GO:0032553//ribonucleotide binding	GO:0044710//single-organism metabolic process
LOC105227078	966	839	724	1118	662	3207	3800	5072	5722	6358	48.7	44.48	34.53	42.37	31.35	104.75	136.42	169.54	177.21	155.1	40.286	148.604	1.88312	1.09196e-28	8.05512e-27	Orct	PREDICTED: organic cation transporter protein [Bactrocera dorsalis]	-	-	-	-	GO:0031224//intrinsic component of membrane	GO:0005215//transporter activity	GO:0044763//single-organism cellular process
LOC105226952	1373	1163	1153	1665	1064	559	677	694	717	903	73.2	65.61	58.17	67.67	54.06	20.28	26.78	25.28	24.57	23.78	63.742	24.138	-1.40094	2.89473e-28	2.10884e-26	--	PREDICTED: leucine-rich repeat-containing protein 20 isoform X1 [Bactrocera dorsalis]	-	-	-	-	-	-	-
LOC105225887	25	25	25	15	10	170	249	217	268	304	2.16	2.27	2.04	0.97	0.81	9.5	15.3	12.42	14.21	12.69	1.65	12.824	2.95831	4.2773e-28	3.09682e-26	SULT1C4	PREDICTED: sulfotransferase 1C4 [Bactrocera dorsalis]	-	-	-	-	-	-	-
LOC105232651	17	24	35	26	45	210	331	303	254	318	0.94	1.4	1.84	1.08	2.34	7.54	13.07	11.14	8.65	8.53	1.52	9.786	2.68665	8.26318e-28	5.94594e-26	Smox	PREDICTED: spermine oxidase [Bactrocera dorsalis]	-	-	-	-	-	-	GO:0044710//single-organism metabolic process
LOC105230511	22	41	46	28	34	235	257	289	221	305	2.83	5.55	5.6	2.71	4.11	19.6	23.56	24.66	17.47	19	4.16	20.858	2.32595	8.52011e-28	6.09344e-26	--	PREDICTED: uncharacterized protein LOC105230511 [Bactrocera dorsalis]	-	-	-	-	-	-	-
LOC105230501	228	183	286	265	304	861	755	838	909	1346	26.94	22.74	31.97	23.54	33.74	65.91	63.52	65.65	65.98	76.95	27.786	67.602	1.28271	1.03728e-27	7.32907e-26	--	PREDICTED: uncharacterized protein LOC105230501 [Bactrocera dorsalis]	-	-	-	-	-	-	-
LOC105232975	147	138	169	167	137	496	707	558	791	925	18.83	18.59	20.48	16.08	16.48	41.16	64.49	47.39	62.24	57.33	18.092	54.522	1.59149	3.5742e-27	2.48058e-25	--	GH18792 [Drosophila grimshawi]	-	-	-	-	-	-	-
LOC105230212	2472	2442	2289	2655	2165	1364	1131	1589	1428	1840	121.51	126.24	106.45	98.12	99.97	43.44	39.59	51.79	43.12	43.77	110.458	44.342	-1.31675	4.22578e-27	2.91554e-25	Cyp6a2	PREDICTED: cytochrome P450 6a2-like [Bactrocera dorsalis]	-	-	-	-	-	-	-
LOC105233006	622	708	624	994	618	2214	1700	2260	2508	3005	59.72	71.48	56.68	71.75	55.73	137.73	116.23	143.88	147.93	139.61	63.072	137.076	1.1199	5.24185e-27	3.59542e-25	swi2	PREDICTED: protein singed wings 2 [Bactrocera dorsalis]	-	-	-	-	-	-	-
LOC105225237	953	824	1372	1347	1052	3172	3781	3593	3573	5231	53.59	48.42	72.66	56.67	55.55	114.82	150.74	133.32	123.06	142.09	57.378	132.806	1.21075	5.88566e-27	4.01354e-25	Oat	PREDICTED: ornithine aminotransferase, mitochondrial [Bactrocera dorsalis]	Metabolism;Metabolism	Global and overview maps;Amino acid metabolism	ko01100//Metabolic pathways;ko00330//Arginine and proline metabolism	K00819;K00819	GO:0044429//mitochondrial part	GO:0008483//transaminase activity;GO:0043168//anion binding	GO:0030154//cell differentiation;GO:1901605//alpha-amino acid metabolic process
LOC105224380	498	462	503	777	296	34	13	91	43	61	23.3	22.73	22.26	27.33	13.01	1.03	0.43	2.82	1.24	1.38	21.726	1.38	-3.97668	6.50727e-27	4.41178e-25	--	PREDICTED: O-acyltransferase like protein [Bactrocera dorsalis]	-	-	-	-	-	-	-
LOC105223475	228	273	345	265	256	972	965	1290	1279	1731	33.62	42.33	48.12	29.38	35.45	92.86	101.32	126.12	115.85	123.51	37.78	111.932	1.56693	8.65363e-27	5.79991e-25	--	PREDICTED: C-type lectin 37Db-like isoform X2 [Bactrocera dorsalis]	-	-	-	-	-	-	-
LOC105232034	1404	1238	2911	2325	2175	701	569	760	637	927	71.52	66.32	140.3	89.04	104.08	23.14	20.64	25.67	19.94	22.85	94.252	22.448	-2.06994	8.71299e-27	5.80652e-25	--	PREDICTED: acidic phospholipase A2 PA4 [Drosophila arizonae]	Metabolism;Organismal Systems;Environmental Information Processing;Organismal Systems;Metabolism;Organismal Systems;Metabolism;Metabolism;Metabolism;Metabolism	Global and overview maps;Digestive system;Signal transduction;Circulatory system;Lipid metabolism;Digestive system;Lipid metabolism;Lipid metabolism;Lipid metabolism;Lipid metabolism	ko01100//Metabolic pathways;ko04972//Pancreatic secretion;ko04014//Ras signaling pathway;ko04270//Vascular smooth muscle contraction;ko00564//Glycerophospholipid metabolism;ko04975//Fat digestion and absorption;ko00565//Ether lipid metabolism;ko00590//Arachidonic acid metabolism;ko00592//alpha-Linolenic acid metabolism;ko00591//Linoleic acid metabolism	K01047;K01047;K01047;K01047;K01047;K01047;K01047;K01047;K01047;K01047	-	-	GO:0006629//lipid metabolic process
LOC105233670	187	231	275	253	248	138	106	118	124	165	18.02	23.41	25.07	18.33	22.45	8.62	7.27	7.54	7.34	7.69	21.456	7.692	-1.47995	1.40602e-26	9.31708e-25	--	PREDICTED: lipopolysaccharide-induced tumor necrosis factor-alpha factor-like [Bactrocera dorsalis]	Cellular Processes	Transport and catabolism	ko04142//Lysosome	K19363	-	-	-
LOC105232205	72	70	81	103	83	273	262	318	262	378	3.99	4.07	4.29	4.35	4.35	9.91	10.48	11.87	9.06	10.32	4.21	10.328	1.29467	2.27759e-26	1.50078e-24	--	PREDICTED: kelch-like protein diablo [Bactrocera dorsalis]	Human Diseases;Human Diseases;Genetic Information Processing;Human Diseases	Cancers;Cancers;Folding, sorting and degradation;Cardiovascular diseases	ko05200//Pathways in cancer;ko05225//Hepatocellular carcinoma;ko04120//Ubiquitin mediated proteolysis;ko05418//Fluid shear stress and atherosclerosis	K10456;K10456;K10456;K10456	-	-	-
LOC109579470	1135	1195	1264	1569	1218	3738	3180	4259	3392	6276	122.18	135.28	128.73	126.98	123.16	260.72	243.77	304	224.32	326.91	127.266	271.944	1.09546	3.5484e-26	2.3251e-24	--	PREDICTED: uncharacterized protein LOC101463198 [Ceratitis capitata]	-	-	-	-	-	-	-
LOC105223010	2701	2409	2638	3309	2463	6749	8156	7465	7180	11831	42.48	39.7	39.17	38.69	36.27	68.9	90.35	76.59	68.95	89.36	39.262	78.83	1.00561	3.71245e-26	2.4172e-24	Abca13	PREDICTED: ATP-binding cassette sub-family A member 13 [Bactrocera dorsalis]	-	-	-	-	GO:0031224//intrinsic component of membrane	GO:0017111//nucleoside-triphosphatase activity;GO:0032550//purine ribonucleoside binding	GO:0051234//establishment of localization
LOC105231309	165	146	168	203	202	607	472	736	737	977	6.51	6.02	6.18	6.01	7.4	15.31	13.1	19	17.61	18.48	6.424	16.7	1.3783	3.73018e-26	2.4172e-24	SLC27A4	PREDICTED: long-chain fatty acid transport protein 4 isoform X1 [Bactrocera dorsalis]	Human Diseases;Organismal Systems;Organismal Systems	Endocrine and metabolic diseases;Endocrine system;Digestive system	ko04931//Insulin resistance;ko03320//PPAR signaling pathway;ko04975//Fat digestion and absorption	K08745;K08745;K08745	-	-	-
LOC105222945	398	324	410	471	392	239	245	259	295	344	23.07	19.78	22.49	20.52	21.37	9	10.13	9.98	10.53	9.66	21.446	9.86	-1.12105	6.71463e-26	4.32724e-24	--	PREDICTED: uncharacterized protein LOC105222945 isoform X1 [Bactrocera dorsalis]	-	-	-	-	-	-	-
LOC105230034	121	130	144	167	144	457	459	455	712	719	14.31	16.17	16.11	14.85	16	35.02	38.66	35.69	51.74	41.15	15.488	40.452	1.38506	1.14664e-25	7.34918e-24	rgn	Regucalcin [Bactrocera dorsalis]	-	-	-	-	-	-	-
LOC105228070	440	366	392	816	740	3191	1991	3038	2556	3507	32.91	28.78	27.74	45.88	51.98	154.62	106.03	150.65	117.43	126.91	37.458	131.128	1.80763	1.44079e-25	9.18424e-24	--	PREDICTED: uncharacterized protein LOC105228070 [Bactrocera dorsalis]	-	-	-	-	-	-	-
LOC105223871	159	144	122	228	176	59	37	21	23	52	3.55	3.38	2.57	3.82	3.69	0.85	0.59	0.31	0.32	0.56	3.402	0.526	-2.69325	1.57947e-25	1.00138e-23	ham	PREDICTED: Krueppel-like factor luna [Bactrocera dorsalis]	-	-	-	-	-	GO:0043169//cation binding	GO:0010468//regulation of gene expression
LOC105231999	112	110	120	145	114	392	392	543	433	725	13.66	14.11	13.84	13.29	13.06	30.97	34.04	43.9	32.44	42.78	13.592	36.826	1.43797	1.83995e-25	1.16026e-23	--	PREDICTED: claw keratin [Bactrocera dorsalis]	-	-	-	-	-	-	-
LOC105230937	117	91	249	82	144	1500	1271	1319	1046	1951	3.84	3.21	7.51	2.02	4.55	31.43	28.91	28.08	20.66	30.26	4.226	27.868	2.72124	2.62384e-25	1.64572e-23	Anpep	PREDICTED: aminopeptidase N isoform X2 [Bactrocera dorsalis]	Metabolism;Metabolism;Organismal Systems;Organismal Systems	Global and overview maps;Metabolism of other amino acids;Endocrine system;Immune system	ko01100//Metabolic pathways;ko00480//Glutathione metabolism;ko04614//Renin-angiotensin system;ko04640//Hematopoietic cell lineage	K11140;K11140;K11140;K11140	-	-	-
LOC105226694	2811	2200	2364	4275	2263	8686	8048	9638	9821	12316	127.69	105.1	101.6	146	96.56	255.66	260.35	290.31	274.07	270.72	115.39	270.222	1.22763	3.12133e-25	1.94734e-23	wat	RE14390p, partial [Drosophila melanogaster]	-	-	-	-	-	GO:0016620//oxidoreductase activity, acting on the aldehyde or oxo group of donors, NAD or NADP as acceptor	-
LOC105229216	14	11	24	23	27	248	137	131	159	274	0.86	0.71	1.4	1.07	1.57	9.92	6.02	5.36	6.03	8.19	1.122	7.104	2.66256	4.47165e-25	2.76042e-23	HEXB	Beta-hexosaminidase subunit beta, partial [Bactrocera dorsalis]	Metabolism;Cellular Processes;Metabolism;Metabolism;Metabolism;Metabolism;Metabolism	Global and overview maps;Transport and catabolism;Carbohydrate metabolism;Glycan biosynthesis and metabolism;Glycan biosynthesis and metabolism;Glycan biosynthesis and metabolism;Glycan biosynthesis and metabolism	ko01100//Metabolic pathways;ko04142//Lysosome;ko00520//Amino sugar and nucleotide sugar metabolism;ko00511//Other glycan degradation;ko00531//Glycosaminoglycan degradation;ko00604//Glycosphingolipid biosynthesis - ganglio series;ko00603//Glycosphingolipid biosynthesis - globo and isoglobo series	K12373;K12373;K12373;K12373;K12373;K12373;K12373	-	GO:0015929//hexosaminidase activity	GO:0044238//primary metabolic process
LOC105229351	399	473	454	546	395	233	282	197	201	279	10.04	12.43	10.84	10.22	9.29	3.8	5.02	3.25	3.07	3.36	10.564	3.7	-1.51356	1.09127e-24	6.66643e-23	--	GH25028 [Drosophila grimshawi]	-	-	-	-	-	-	-
LOC105231415	49	47	63	139	63	3	4	6	9	5	3.43	3.46	4.17	7.31	4.14	0.14	0.2	0.28	0.39	0.17	4.502	0.236	-4.25371	1.13847e-24	6.9187e-23	Ccp84Ab	Larval cuticle protein A2B, partial [Bactrocera dorsalis]	-	-	-	-	-	-	-
LOC105230495	236	324	359	349	270	1279	817	1077	1272	1441	8.83	13.53	13.7	10.59	9.83	34.01	22.95	28.65	30.87	28.04	11.296	28.904	1.35546	1.20099e-24	7.26104e-23	--	PREDICTED: kinesin-related protein 6 isoform X2 [Bactrocera dorsalis]	-	-	-	-	-	-	-
LOC105224837	115	90	63	135	55	13	12	10	9	7	12.91	10.63	6.69	11.4	5.8	0.95	0.96	0.74	0.62	0.38	9.486	0.73	-3.69983	1.26252e-24	7.56052e-23	--	PREDICTED: cuticle protein 38-like [Bactrocera dorsalis]	-	-	-	-	-	-	-
LOC105232747	239	172	158	252	220	672	888	1067	1101	1462	27.9	21.11	17.45	22.11	24.12	50.82	73.81	82.58	78.95	82.58	22.538	73.748	1.71024	1.26342e-24	7.56052e-23	Lcp65Ag2	PREDICTED: larval cuticle protein 8-like [Bactrocera dorsalis]	-	-	-	-	-	GO:0005214//structural constituent of chitin-based cuticle	GO:0042335//cuticle development;GO:0051234//establishment of localization
LOC105222009	12687	8671	11932	13912	10571	30970	31904	35743	34262	49812	356.84	256.47	317.51	294.17	279.29	564.4	639.01	666.61	592.01	677.95	300.856	627.996	1.06168	1.28716e-24	7.66347e-23	GlyP	PREDICTED: glycogen phosphorylase [Bactrocera dorsalis]	Metabolism;Organismal Systems;Organismal Systems;Human Diseases;Cellular Processes;Metabolism	Global and overview maps;Endocrine system;Endocrine system;Endocrine and metabolic diseases;Cell growth and death;Carbohydrate metabolism	ko01100//Metabolic pathways;ko04910//Insulin signaling pathway;ko04922//Glucagon signaling pathway;ko04931//Insulin resistance;ko04217//Necroptosis;ko00500//Starch and sucrose metabolism	K00688;K00688;K00688;K00688;K00688;K00688	GO:0032991//macromolecular complex	GO:0004645//phosphorylase activity;GO:0043168//anion binding;GO:0046983//protein dimerization activity	GO:0005981//regulation of glycogen catabolic process;GO:0010259//multicellular organism aging;GO:0031348//negative regulation of defense response;GO:0040011//locomotion;GO:0042742//defense response to bacterium
LOC105231023	8798	7896	8349	11887	7326	25251	23497	34751	31222	38534	375.02	354.94	334.4	382.37	293.05	695.06	712.9	977.08	816.43	795.81	347.956	799.456	1.20011	1.5858e-24	9.39384e-23	Elovl7	PREDICTED: elongation of very long chain fatty acids protein 7 [Bactrocera dorsalis]	-	-	-	-	GO:0031224//intrinsic component of membrane	GO:0003824//catalytic activity	GO:0006631//fatty acid metabolic process
LOC105223657	192	123	126	220	147	39	47	55	54	79	6.63	4.47	4.12	5.71	4.77	0.87	1.16	1.26	1.15	1.32	5.14	1.152	-2.15763	1.6146e-24	9.51638e-23	Skeletor	PREDICTED: protein Skeletor, isoforms B/C [Bactrocera dorsalis]	-	-	-	-	-	-	-
LOC105226864	419	497	492	799	523	273	336	232	251	375	23.1	27.55	25.81	31.8	26.79	9.69	13.24	8.1	8.71	9.65	27.01	9.878	-1.4512	2.28285e-24	1.33212e-22	ken	PREDICTED: transcription factor Ken isoform X2 [Bactrocera dorsalis]	-	-	-	-	-	-	-
LOC105231752	150	160	163	174	151	427	428	498	525	633	15.95	17.9	16.4	13.91	15.09	29.43	32.42	35.12	34.3	32.58	15.85	32.77	1.04789	7.67792e-24	4.43618e-22	Rdh14	PREDICTED: LOW QUALITY PROTEIN: retinol dehydrogenase 14 [Bactrocera dorsalis]	-	-	-	-	-	GO:0003824//catalytic activity	GO:0044710//single-organism metabolic process
LOC105225709	44	20	20	82	51	531	328	318	396	644	4.16	1.99	1.79	5.83	4.53	32.53	22.09	19.94	23	29.47	3.66	25.406	2.79525	9.74285e-24	5.60166e-22	dhs-21	3-oxoacyl-(acyl-carrier-protein) reductase FabG, partial [Bactrocera dorsalis]	-	-	-	-	-	-	-
LOC105226103	131	74	118	164	139	29	10	5	24	22	3.78	2.25	3.22	3.56	3.77	0.54	0.21	0.1	0.43	0.31	3.316	0.318	-3.38235	1.48238e-23	8.4402e-22	Pxt	PREDICTED: peroxidase [Bactrocera dorsalis]	-	-	-	-	-	GO:0046906//tetrapyrrole binding	GO:0006950//response to stress;GO:0044710//single-organism metabolic process
LOC105230744	1128	852	999	1435	996	508	568	651	584	948	39.36	31.27	32.98	37.65	32.65	11.49	14.11	15.06	12.52	16.01	34.782	13.838	-1.32971	1.91795e-23	1.08674e-21	--	Leucine-rich repeat-containing protein 15 [Bactrocera dorsalis]	-	-	-	-	-	-	-
LOC105233859	215	179	199	297	210	79	103	100	126	157	11.67	10.21	10.22	12.12	10.7	2.78	3.98	3.6	4.2	4.12	10.984	3.736	-1.55584	3.5581e-23	1.99679e-21	--	PREDICTED: transcription factor SPT20 homolog [Bactrocera dorsalis]	-	-	-	-	-	-	-
LOC105233124	1671	2044	2182	3028	2348	1437	1537	1145	1402	2169	87.51	112.57	108.11	119.21	115.5	48.76	57.32	39.76	45.1	54.96	108.58	49.18	-1.14261	6.06298e-23	3.38632e-21	--	PREDICTED: LOW QUALITY PROTEIN: myosin-3 [Bactrocera dorsalis]	-	-	-	-	-	-	-
LOC105231608	66	99	116	100	70	509	394	341	536	844	1.29	2.04	2.15	1.47	1.29	6.45	5.48	4.42	6.44	7.98	1.648	6.154	1.90081	7.00783e-23	3.89549e-21	Gld	PREDICTED: glucose dehydrogenase [FAD, quinone] [Bactrocera dorsalis]	-	-	-	-	-	GO:0000166//nucleotide binding;GO:0016614//oxidoreductase activity, acting on CH-OH group of donors	GO:0044710//single-organism metabolic process
LOC105226824	451	343	547	571	239	1771	2298	2534	2402	3310	38.56	30.93	44.16	36.71	19.21	98.09	140.16	143.79	126.19	136.95	33.914	129.036	1.92782	7.60594e-23	4.20802e-21	Cp1	PREDICTED: cathepsin L1 [Bactrocera dorsalis]	Cellular Processes;Human Diseases;Cellular Processes;Human Diseases;Cellular Processes;Cellular Processes;Human Diseases;Organismal Systems	Transport and catabolism;Cancers;Transport and catabolism;Cardiovascular diseases;Transport and catabolism;Cell growth and death;Immune diseases;Immune system	ko04142//Lysosome;ko05205//Proteoglycans in cancer;ko04140//Autophagy - animal;ko05418//Fluid shear stress and atherosclerosis;ko04145//Phagosome;ko04210//Apoptosis;ko05323//Rheumatoid arthritis;ko04612//Antigen processing and presentation	K01365;K01365;K01365;K01365;K01365;K01365;K01365;K01365	-	GO:0008233//peptidase activity	-
LOC105224023	278	351	270	410	390	1089	1502	1741	1740	1551	15.95	20.95	14.08	17.56	20.96	39.53	61.07	64.71	61.6	43.07	17.9	53.996	1.59289	8.61395e-23	4.74333e-21	CLN3	PREDICTED: battenin-like [Bactrocera dorsalis]	Cellular Processes	Transport and catabolism	ko04142//Lysosome	K12389	GO:0031224//intrinsic component of membrane	-	-
LOC105226210	84	86	103	146	64	29	13	25	18	32	5.27	5.67	6.11	6.88	3.77	1.18	0.58	1.04	0.69	0.97	5.54	0.892	-2.63477	1.31237e-22	7.15942e-21	-	-	-	-	-	-	-	-	-
LOC105222124	205	280	346	236	263	112	112	100	101	141	9.19	13.2	14.68	7.95	11.08	3.25	3.58	2.97	2.78	3.06	11.22	3.128	-1.84276	1.4526e-22	7.88776e-21	--	Serine protease easter, partial [Bactrocera dorsalis]	-	-	-	-	-	-	-
LOC105222515	125	105	104	181	117	44	55	39	32	41	7.22	6.37	5.68	7.83	6.39	1.67	2.27	1.49	1.14	1.16	6.698	1.546	-2.11519	1.54302e-22	8.34014e-21	--	PREDICTED: chondroitin proteoglycan-2-like [Bactrocera dorsalis]	-	-	-	-	-	GO:0097367//carbohydrate derivative binding	GO:0006022//aminoglycan metabolic process
LOC105225192	208	183	207	215	206	545	605	729	713	1039	15.68	14.5	14.76	12.18	14.58	26.61	32.47	36.43	33.01	37.89	14.34	33.282	1.2147	2.32672e-22	1.24613e-20	Prss36	PREDICTED: trypsin [Bactrocera dorsalis]	-	-	-	-	-	-	-
LOC105233335	759	849	951	1107	851	632	502	652	641	967	31.19	36.69	36.98	34.2	32.85	16.83	14.69	17.77	16.18	19.23	34.382	16.94	-1.02122	2.36895e-22	1.26297e-20	moody	PREDICTED: G-protein coupled receptor moody [Bactrocera dorsalis]	-	-	-	-	GO:0031224//intrinsic component of membrane	GO:0004888//transmembrane signaling receptor activity	GO:0007166//cell surface receptor signaling pathway
LOC105223295	4537	3159	7090	5264	5873	2564	1221	1224	1279	2095	159.73	116.96	236.16	139.33	194.22	58.49	30.61	28.57	27.66	35.69	169.28	36.204	-2.22519	3.13027e-22	1.66131e-20	aldh1l1	PREDICTED: LOW QUALITY PROTEIN: cytosolic 10-formyltetrahydrofolate dehydrogenase [Bactrocera dorsalis]	Metabolism	Metabolism of cofactors and vitamins	ko00670//One carbon pool by folate	K00289	GO:0044424//intracellular part	GO:0016646//oxidoreductase activity, acting on the CH-NH group of donors, NAD or NADP as acceptor;GO:0016741//transferase activity, transferring one-carbon groups;GO:0016903//oxidoreductase activity, acting on the aldehyde or oxo group of donors	GO:0009256//10-formyltetrahydrofolate metabolic process
LOC105223858	188	177	234	247	198	146	86	105	103	141	22.62	22.4	26.64	22.34	22.39	11.38	7.36	8.38	7.61	8.21	23.278	8.588	-1.43857	7.77092e-22	4.10563e-20	HmgD	PREDICTED: high mobility group protein D [Bactrocera dorsalis]	-	-	-	-	-	-	-
LOC105221865	25	22	40	42	23	237	240	329	702	1127	4.24	3.92	6.41	5.35	3.66	26.02	28.96	36.96	73.07	92.4	4.716	51.482	3.44843	7.82019e-22	4.11314e-20	Obp56h	PREDICTED: general odorant-binding protein 56d-like [Bactrocera dorsalis]	-	-	-	-	-	-	-
LOC105231031	109	63	72	99	59	19	4	8	6	8	9.45	5.74	5.91	6.45	4.81	1.07	0.25	0.46	0.32	0.34	6.472	0.488	-3.72926	1.07303e-21	5.59361e-20	--	PREDICTED: extensin [Bactrocera dorsalis]	-	-	-	-	-	-	-
LOC105222920	44	57	42	77	65	191	219	257	274	364	2.47	3.4	2.22	3.27	3.47	6.98	8.82	9.62	9.51	9.96	2.966	8.978	1.59788	2.64518e-21	1.36076e-19	--	PREDICTED: vitellogenin-A2 [Musca domestica]	-	-	-	-	-	-	-
LOC105233895	885	724	1019	1135	742	4052	3829	4632	5705	3291	162.61	139.9	177.14	156.78	128.07	482.4	501.01	564.35	643.97	292.61	152.9	496.868	1.70027	2.89687e-21	1.47728e-19	--	PREDICTED: glycine-rich cell wall structural protein-like [Bactrocera dorsalis]	-	-	-	-	-	-	-
LOC105230985	52	111	88	118	81	383	362	337	355	441	4.04	9.07	6.47	6.9	5.91	19.29	20.04	17.37	16.95	16.59	6.478	18.048	1.47822	4.85585e-21	2.45493e-19	-	-	-	-	-	-	-	-	-
LOC105229867	320	249	444	347	418	1275	1165	1219	1184	2096	12.15	9.94	15.95	9.9	14.91	31.36	31.5	30.69	27.62	38.51	12.57	31.936	1.3452	5.0674e-21	2.55088e-19	--	Endothelin-converting enzyme 1 [Ceratitis capitata]	-	-	-	-	-	GO:0070011//peptidase activity, acting on L-amino acid peptides	GO:0019538//protein metabolic process
LOC105224723	677	537	577	875	615	429	456	461	440	615	23.91	19.94	19.28	23.23	20.4	9.82	11.47	10.79	9.54	10.51	21.352	10.426	-1.03419	5.401e-21	2.70719e-19	GA16561	PREDICTED: glycosyltransferase 25 family member [Bactrocera dorsalis]	Metabolism;Metabolism	Amino acid metabolism;Glycan biosynthesis and metabolism	ko00310//Lysine degradation;ko00514//Other types of O-glycan biosynthesis	K11703;K11703	-	-	-
LOC105229438	65	66	81	96	75	233	256	201	263	333	4.57	4.86	5.4	5.1	4.93	10.73	13.02	9.42	11.4	11.42	4.972	11.198	1.17134	8.01267e-21	3.98223e-19	Sb	PREDICTED: proclotting enzyme [Bactrocera dorsalis]	-	-	-	-	-	GO:0070011//peptidase activity, acting on L-amino acid peptides	-
LOC105223247	466	478	476	698	427	253	117	226	167	157	13.6	14.53	13.07	15.31	11.61	4.8	2.45	4.42	3	2.24	13.624	3.382	-2.0102	1.407e-20	6.96316e-19	--	PREDICTED: mucin-19 [Bactrocera dorsalis]	-	-	-	-	-	-	-
LOC105225990	1406	1798	1797	2959	1819	1311	1019	932	892	1630	41.56	55.9	50.25	65.76	50.51	25.11	21.45	18.28	16.2	23.32	52.796	20.872	-1.33886	2.22415e-20	1.09151e-18	--	PREDICTED: zinc finger protein 82 homolog [Bactrocera dorsalis]	-	-	-	-	-	GO:0043169//cation binding	-
LOC105232340	110	93	184	136	151	43	29	48	24	52	2.64	2.34	4.17	2.45	3.4	0.67	0.49	0.76	0.35	0.6	3	0.574	-2.38584	2.37931e-20	1.16279e-18	Ncam2	PREDICTED: neurotrimin [Bactrocera dorsalis]	-	-	-	-	-	-	-
LOC105226558	22	18	10	13	8	148	158	89	184	209	1.45	1.25	0.63	0.65	0.5	6.34	7.44	3.9	7.47	6.69	0.896	6.368	2.82927	4.04826e-20	1.95399e-18	Ttpa	PREDICTED: alpha-tocopherol transfer protein-like [Bactrocera dorsalis]	-	-	-	-	GO:0044464//cell part	-	GO:0051234//establishment of localization
LOC105227507	311	311	299	455	321	252	181	248	231	286	6.63	6.97	6.03	7.29	6.43	3.48	2.75	3.5	3.02	2.95	6.67	3.14	-1.08692	5.13797e-20	2.46981e-18	TMEM94	PREDICTED: LOW QUALITY PROTEIN: transmembrane protein 94 [Bactrocera dorsalis]	-	-	-	-	-	-	-
LOC105225976	1136	1431	1096	1812	1225	7114	3383	4480	4780	6876	31	41.39	28.55	37.58	31.64	125.92	65.91	81.61	80.47	91.63	34.032	89.108	1.38866	5.45713e-20	2.61252e-18	Slc12a2	PREDICTED: bumetanide-sensitive sodium-(potassium)-chloride cotransporter [Bactrocera dorsalis]	Organismal Systems;Organismal Systems;Human Diseases	Digestive system;Digestive system;Infectious diseases	ko04972//Pancreatic secretion;ko04970//Salivary secretion;ko05110//Vibrio cholerae infection	K10951;K10951;K10951	GO:0031224//intrinsic component of membrane	GO:0015377//cation:chloride symporter activity;GO:0046943//carboxylic acid transmembrane transporter activity	GO:0006821//chloride transport;GO:0006865//amino acid transport;GO:0044763//single-organism cellular process
LOC105227501	331	342	387	512	397	287	245	208	250	420	5.5	5.98	6.09	6.4	6.2	3.09	2.9	2.29	2.55	3.38	6.034	2.842	-1.08621	6.93992e-20	3.28219e-18	Usp54	Inactive ubiquitin carboxyl-terminal hydrolase 54, partial [Ceratitis capitata]	-	-	-	-	-	GO:0016787//hydrolase activity	-
LOC105230752	341	477	463	769	460	140	184	140	152	364	3.58	5.31	4.59	6.05	4.5	0.94	1.33	0.94	0.95	1.82	4.806	1.196	-2.00662	1.73707e-19	8.04085e-18	--	PREDICTED: mucin-5AC isoform X1 [Bactrocera dorsalis]	-	-	-	-	-	-	-
LOC105222377	237	200	293	277	219	125	121	158	127	170	5.92	5.28	6.94	5.21	5.15	2.03	2.16	2.63	1.96	2.06	5.7	2.168	-1.3946	1.7413e-19	8.04085e-18	SLC7A5	PREDICTED: large neutral amino acids transporter small subunit 1 [Bactrocera dorsalis]	-	-	-	-	GO:0031224//intrinsic component of membrane	GO:0046943//carboxylic acid transmembrane transporter activity	-
LOC105223158	289	329	517	417	333	105	81	161	65	171	18.75	22.44	31.73	20.33	20.29	4.41	3.74	6.92	2.59	5.37	22.708	4.606	-2.30161	1.92721e-19	8.86441e-18	CYTB5-B	PREDICTED: cytochrome b5 [Bactrocera dorsalis]	-	-	-	-	-	GO:0005488//binding	-
LOC105227697	4917	4360	6364	5259	5738	2540	2777	3490	3293	4508	427.41	398.56	523.37	343.67	468.52	143.06	171.9	201.16	175.85	189.62	432.306	176.318	-1.29387	2.45954e-19	1.12249e-17	--	PREDICTED: uncharacterized protein LOC105227697 [Bactrocera dorsalis]	-	-	-	-	-	-	-
LOC105231671	760	829	837	1349	799	409	449	605	547	731	52.76	60.53	54.98	70.41	52.11	18.4	22.2	27.85	23.33	24.56	58.158	23.268	-1.32163	2.57445e-19	1.17038e-17	--	PREDICTED: uncharacterized protein LOC105231671 [Bactrocera dorsalis]	-	-	-	-	-	-	-
LOC115065792	44	54	42	53	74	11	5	13	6	11	9.93	12.82	8.97	9	15.69	1.61	0.8	1.95	0.83	1.2	11.282	1.278	-3.14206	3.02267e-19	1.36357e-17	UGT2B13	UDP-glucuronosyltransferase 2B31 [Bactrocera dorsalis]	Metabolism;Metabolism;Metabolism;Metabolism;Human Diseases;Metabolism;Organismal Systems;Metabolism;Metabolism;Metabolism;Metabolism	Global and overview maps;Xenobiotics biodegradation and metabolism;Xenobiotics biodegradation and metabolism;Xenobiotics biodegradation and metabolism;Cancers;Carbohydrate metabolism;Digestive system;Metabolism of cofactors and vitamins;Metabolism of cofactors and vitamins;Carbohydrate metabolism;Lipid metabolism	ko01100//Metabolic pathways;ko00983//Drug metabolism - other enzymes;ko00980//Metabolism of xenobiotics by cytochrome P450;ko00982//Drug metabolism - cytochrome P450;ko05204//Chemical carcinogenesis;ko00040//Pentose and glucuronate interconversions;ko04976//Bile secretion;ko00860//Porphyrin and chlorophyll metabolism;ko00830//Retinol metabolism;ko00053//Ascorbate and aldarate metabolism;ko00140//…	K00699;K00699;K00699;K00699;K00699;K00699;K00699;K00699;K00699;K00699;K00699	-	-	-
LOC105231877	103	142	191	151	111	34	41	56	33	39	5.19	7.55	9.1	5.72	5.25	1.11	1.47	1.87	1.02	0.95	6.562	1.284	-2.35349	3.0891e-19	1.3882e-17	CRISP3	PREDICTED: cysteine-rich secretory protein LCCL domain-containing 2 isoform X1 [Bactrocera dorsalis]	-	-	-	-	-	-	-
LOC105233803	19	8	41	12	10	191	249	214	331	478	2.35	1.04	4.81	1.12	1.16	15.33	21.97	17.58	25.2	28.65	2.096	21.746	3.37504	3.43873e-19	1.53942e-17	--	PREDICTED: uncharacterized protein LOC105233803 [Bactrocera dorsalis]	-	-	-	-	-	-	-
LOC105231755	78	69	78	92	40	269	314	346	372	412	5.24	4.88	4.96	4.65	2.53	11.72	15.03	15.43	15.37	13.4	4.452	14.19	1.67235	3.45839e-19	1.54234e-17	P4HA2	PREDICTED: prolyl 4-hydroxylase subunit alpha-2 isoform X1 [Bactrocera dorsalis]	Metabolism;Metabolism	Global and overview maps;Amino acid metabolism	ko01100//Metabolic pathways;ko00330//Arginine and proline metabolism	K00472;K00472	-	GO:0016705//oxidoreductase activity, acting on paired donors, with incorporation or reduction of molecular oxygen;GO:0043167//ion binding	GO:0008152//metabolic process
LOC105233940	2128	2292	2327	2861	1743	5712	5647	7079	7509	9852	125.85	142.55	130.18	127.2	96.83	218.88	237.82	277.6	272.81	281.95	124.522	257.812	1.04992	4.30163e-19	1.91113e-17	faah2b	PREDICTED: fatty-acid amide hydrolase 2-B [Bactrocera dorsalis]	-	-	-	-	-	GO:0016810//hydrolase activity, acting on carbon-nitrogen (but not peptide) bonds;GO:0016879//ligase activity, forming carbon-nitrogen bonds	-
LOC105229562	675	632	772	822	648	1636	2102	2525	2190	3240	48.12	47.38	52.06	44.05	43.39	75.56	106.7	119.35	95.91	111.76	47	101.856	1.1158	4.33959e-19	1.92072e-17	Cyt-b5-r	PREDICTED: cytochrome b5-related protein [Bactrocera dorsalis]	-	-	-	-	-	GO:0043169//cation binding;GO:0046906//tetrapyrrole binding	-
LOC109579399	14	26	18	32	7	112	198	207	234	303	1.37	2.67	1.66	2.35	0.64	7.08	13.75	13.38	14.02	14.3	1.738	12.506	2.84712	4.39558e-19	1.93819e-17	--	PREDICTED: shematrin-like protein 2 [Bactrocera dorsalis]	-	-	-	-	-	-	-
LOC105226894	1988	2165	3234	2670	1962	1131	1100	1191	1576	1838	279.13	319.68	429.6	281.84	258.77	102.89	109.99	110.89	135.94	124.88	313.804	116.918	-1.42437	4.9669e-19	2.1819e-17	--	GH19735 [Drosophila grimshawi]	-	-	-	-	-	-	-
LOC105228430	205	141	146	187	156	524	551	496	600	954	8.14	6.09	5.82	5.95	6.15	15.23	17.03	14.29	15.88	20.2	6.43	16.526	1.36185	6.33561e-19	2.76247e-17	Slc18a2	PREDICTED: synaptic vesicular amine transporter isoform X1 [Bactrocera dorsalis]	Human Diseases;Organismal Systems;Organismal Systems;Human Diseases;Organismal Systems;Human Diseases;Human Diseases	Neurodegenerative diseases;Nervous system;Nervous system;Substance dependence;Nervous system;Substance dependence;Substance dependence	ko05012//Parkinson disease;ko04728//Dopaminergic synapse;ko04721//Synaptic vesicle cycle;ko05034//Alcoholism;ko04726//Serotonergic synapse;ko05031//Amphetamine addiction;ko05030//Cocaine addiction	K08155;K08155;K08155;K08155;K08155;K08155;K08155	GO:0016023//cytoplasmic, membrane-bounded vesicle;GO:0031224//intrinsic component of membrane;GO:0045202//synapse	GO:0005275//amine transmembrane transporter activity	GO:0006812//cation transport;GO:0015837//amine transport;GO:0044763//single-organism cellular process
LOC105230358	33	36	38	51	36	3	6	7	8	4	1.23	1.41	1.34	1.43	1.26	0.07	0.16	0.17	0.18	0.07	1.334	0.13	-3.35918	6.37537e-19	2.76951e-17	--	Pentraxin-related protein PTX3, partial [Ceratitis capitata]	-	-	-	-	-	-	-
LOC105225122	244	180	253	319	172	108	100	82	116	171	11.58	8.99	11.36	11.38	7.67	3.32	3.38	2.58	3.38	3.93	10.196	3.318	-1.61962	7.55597e-19	3.27026e-17	dpp	Protein decapentaplegic, partial [Bactrocera dorsalis]	Human Diseases;Environmental Information Processing;Human Diseases;Environmental Information Processing;Organismal Systems;Cellular Processes;Environmental Information Processing;Environmental Information Processing;Human Diseases;Environmental Information Processing	Cancers;Signal transduction;Cardiovascular diseases;Signal transduction;Endocrine system;Cellular community - eukaryotes;Signal transduction;Signal transduction;Cancers;Signaling molecules and interaction	ko05200//Pathways in cancer;ko04013//MAPK signaling pathway - fly;ko05418//Fluid shear stress and atherosclerosis;ko04390//Hippo signaling pathway;ko04919//Thyroid hormone signaling pathway;ko04550//Signaling pathways regulating pluripotency of stem cells;ko04350//TGF-beta signaling pathway;ko04341//Hedgehog signaling pathway - fly;ko05217//Basal cell carcinoma;ko04060//Cytokine-cytokine receptor…	K04662;K04662;K04662;K04662;K04662;K04662;K04662;K04662;K04662;K04662	GO:0042995//cell projection;GO:0043231//intracellular membrane-bounded organelle;GO:0044421//extracellular region part	GO:0005126//cytokine receptor binding;GO:0005539//glycosaminoglycan binding;GO:0032403//protein complex binding;GO:0046983//protein dimerization activity	GO:0001745//compound eye morphogenesis;GO:0002066//columnar/cuboidal epithelial cell development;GO:0006996//organelle organization;GO:0007310//oocyte dorsal/ventral axis specification;GO:0007448//anterior/posterior pattern specification, imaginal disc;GO:0007449//proximal/distal pattern formation, imaginal disc;GO:0007560//imaginal disc morphogenesis;GO:0008283//cell proliferation;GO:0008595//an…
LOC105232933	24	9	31	25	22	115	114	126	151	188	1.76	0.7	2.16	1.38	1.52	5.48	5.97	6.14	6.82	6.69	1.504	6.22	2.04811	8.32162e-19	3.58839e-17	-	-	-	-	-	-	-	-	-
LOC105226200	295	342	533	558	561	188	233	221	214	327	28.25	34.44	48.28	40.17	50.46	11.66	15.89	14.03	12.59	15.15	40.32	13.864	-1.54015	1.06049e-18	4.5231e-17	--	PREDICTED: probable salivary secreted peptide [Bactrocera dorsalis]	-	-	-	-	-	-	-
LOC105225268	34	96	56	95	72	677	329	381	381	699	1.64	4.86	2.55	3.44	3.26	21.12	11.28	12.17	11.27	16.29	3.15	14.426	2.19525	1.20315e-18	5.11297e-17	CarT	PREDICTED: organic cation transporter protein-like [Bactrocera dorsalis]	-	-	-	-	-	GO:0005215//transporter activity	GO:0044763//single-organism cellular process
LOC105227988	104	155	132	152	185	413	529	532	573	708	11.62	18.21	13.95	12.77	19.41	29.89	42.08	39.41	39.32	38.27	15.192	37.794	1.31485	1.22912e-18	5.20446e-17	mdh	Malate dehydrogenase, partial [Bactrocera dorsalis]	-	-	-	-	-	GO:0003824//catalytic activity	GO:0044710//single-organism metabolic process
LOC105227883	30	41	56	56	37	271	207	224	207	198	3.23	4.64	5.7	4.53	3.74	18.9	15.87	15.99	13.69	10.31	4.368	14.952	1.77529	1.67998e-18	7.08792e-17	SDR-1	PREDICTED: farnesol dehydrogenase-like [Bactrocera dorsalis]	-	-	-	-	-	-	-
LOC105229968	105	68	84	89	99	351	337	270	280	460	5	3.41	3.79	3.19	4.43	10.83	11.43	8.53	8.19	10.6	3.964	9.916	1.3228	2.3022e-18	9.67832e-17	Est-5A	PREDICTED: venom carboxylesterase-6-like [Bactrocera dorsalis]	Metabolism	Metabolism of terpenoids and polyketides	ko00981//Insect hormone biosynthesis	K01063	-	-	-
LOC105224101	851	566	923	645	482	2596	2860	3277	4000	4722	142.15	99.42	145.86	81	75.63	280.96	340.2	362.96	410.47	381.67	108.812	355.252	1.70701	2.45472e-18	1.02827e-16	--	odorant binding protein 50c [Bactrocera dorsalis]	-	-	-	-	-	-	-
LOC105229768	250	108	182	81	106	1834	3631	2211	1992	4141	14.92	6.78	10.27	3.63	5.94	70.91	154.29	87.48	73.02	119.57	8.308	101.054	3.60448	2.51397e-18	1.04934e-16	ACHE1	PREDICTED: bile salt-activated lipase [Bactrocera dorsalis]	Metabolism;Organismal Systems	Lipid metabolism;Nervous system	ko00564//Glycerophospholipid metabolism;ko04725//Cholinergic synapse	K01049;K01049	-	-	-
LOC105227747	5779	4597	7505	6863	6660	3524	3415	4492	3546	5629	201.27	169.22	247.29	179.69	219.07	79.52	84.7	103.73	75.87	94.86	203.308	87.736	-1.21243	4.96889e-18	2.05212e-16	Slc17a5	PREDICTED: sialin isoform X1 [Bactrocera dorsalis]	-	-	-	-	-	-	GO:0044763//single-organism cellular process
LOC105225134	237	183	274	344	269	149	134	129	136	251	7.56	6.06	8.12	8.06	7.93	3.11	3.09	2.73	2.72	3.87	7.546	3.104	-1.28158	6.13007e-18	2.52279e-16	--	PREDICTED: zinc finger CCCH domain-containing protein 18 isoform X3 [Bactrocera dorsalis]	-	-	-	-	-	-	-
LOC105229756	290	319	194	495	326	128	45	113	66	119	24.35	28.17	15.41	31.25	25.72	6.96	2.69	6.29	3.41	4.84	24.98	4.838	-2.36829	6.64173e-18	2.7238e-16	--	PREDICTED: pinin [Bactrocera dorsalis]	-	-	-	-	-	-	-
LOC105230815	9	8	5	4	5	82	49	105	77	115	0.34	0.31	0.18	0.11	0.17	1.98	1.3	2.59	1.76	2.07	0.222	1.94	3.12743	8.02226e-18	3.25582e-16	Ir21a	PREDICTED: ionotropic receptor 21a [Bactrocera dorsalis]	-	-	-	-	-	-	GO:0007215//glutamate receptor signaling pathway
LOC105230363	13223	14205	18296	15351	16791	7245	8966	10295	8991	14041	506.9	572.65	663.56	442.41	604.63	179.95	244.76	261.69	211.74	260.46	558.03	231.72	-1.26796	1.06979e-17	4.29713e-16	Gel	PREDICTED: gelsolin [Bactrocera dorsalis]	Human Diseases;Cellular Processes;Organismal Systems	Cancers;Cell motility;Immune system	ko05203//Viral carcinogenesis;ko04810//Regulation of actin cytoskeleton;ko04666//Fc gamma R-mediated phagocytosis	K05768;K05768;K05768	-	GO:0046872//metal ion binding	GO:0051693//actin filament capping
LOC105225824	861	646	1442	1150	806	410	411	406	482	706	56.71	44.75	89.86	56.94	49.87	17.5	19.28	17.73	19.5	22.5	59.626	19.302	-1.62719	1.96593e-17	7.84301e-16	Cyp9f2	PREDICTED: probable cytochrome P450 9f2 [Bactrocera dorsalis]	-	-	-	-	-	GO:0016491//oxidoreductase activity;GO:0046872//metal ion binding;GO:0046906//tetrapyrrole binding	GO:0044710//single-organism metabolic process
LOC105223590	95	74	63	99	80	341	375	309	276	682	3.82	3.13	2.4	3	3.03	8.9	10.75	8.25	6.83	13.29	3.076	9.604	1.64258	2.09356e-17	8.29572e-16	-	-	-	-	-	-	-	-	-
LOC105230858	164	150	329	277	128	60	43	57	29	83	8.71	8.54	16.76	11.18	6.49	2.1	1.69	2.08	0.99	2.12	10.336	1.796	-2.52482	2.12724e-17	8.40081e-16	far1	PREDICTED: putative fatty acyl-CoA reductase CG5065 [Bactrocera dorsalis]	Cellular Processes;Organismal Systems;Metabolism	Transport and catabolism;Aging;Lipid metabolism	ko04146//Peroxisome;ko04212//Longevity regulating pathway - worm;ko00073//Cutin, suberine and wax biosynthesis	K13356;K13356;K13356	-	GO:0016620//oxidoreductase activity, acting on the aldehyde or oxo group of donors, NAD or NADP as acceptor	-
LOC105234069	39	55	66	72	54	220	165	246	313	400	9.09	13.49	14.56	12.62	11.83	33.24	27.4	38.04	44.84	45.14	12.318	37.732	1.61502	2.21336e-17	8.71157e-16	-	-	-	-	-	-	-	-	-
LOC105230347	133	62	76	80	65	365	471	468	428	679	9.43	4.62	5.1	4.26	4.33	16.77	23.78	22	18.64	23.3	5.548	20.898	1.91333	2.23381e-17	8.76267e-16	AGAP009593	PREDICTED: zinc carboxypeptidase-like [Bactrocera dorsalis]	-	-	-	-	-	GO:0008235//metalloexopeptidase activity;GO:0046914//transition metal ion binding	GO:0019538//protein metabolic process
LOC105232517	38	45	22	63	32	5	3	1	3	3	1.99	2.53	1.14	2.62	1.62	0.16	0.11	0.04	0.1	0.08	1.98	0.098	-4.33657	2.9751e-17	1.15546e-15	y	PREDICTED: major royal jelly protein 1 [Bactrocera dorsalis]	-	-	-	-	-	-	-
LOC105230430	250	205	347	316	405	158	127	143	144	235	33.77	29.12	44.34	32.09	51.38	13.83	12.22	12.81	11.95	15.36	38.14	13.234	-1.52706	3.55028e-17	1.36978e-15	--	GL18254 [Drosophila persimilis]	-	-	-	-	-	-	-
LOC105228069	68	70	126	74	135	387	647	442	545	886	5.28	5.71	9.25	4.32	9.84	19.46	35.76	22.75	25.99	33.28	6.88	27.448	1.99622	3.66875e-17	1.41084e-15	--	PREDICTED: uncharacterized protein LOC105228069 [Bactrocera dorsalis]	-	-	-	-	-	-	-
LOC105232316	19527	20711	20426	25730	18943	12632	13680	16765	13921	22486	1961.37	2187.66	1941.05	1942.94	1787.27	822.1	978.5	1116.59	859	1092.91	1964.06	973.82	-1.01211	4.44438e-17	1.69247e-15	--	PREDICTED: uncharacterized protein LOC105232316 [Bactrocera dorsalis]	-	-	-	-	-	-	-
LOC105226519	716	704	1188	943	935	412	385	453	374	800	31.31	32.38	49.15	31	38.41	11.67	11.99	13.14	10.05	16.93	36.45	12.756	-1.51474	4.78516e-17	1.81049e-15	ea	Serine protease easter, partial [Bactrocera dorsalis]	-	-	-	-	-	-	-
LOC105223824	2532	1978	3356	3963	3426	1927	1631	1767	2271	2846	152.88	125.6	191.71	179.89	194.31	75.39	70.13	70.75	84.24	83.15	168.878	76.732	-1.13808	6.08939e-17	2.28918e-15	--	PREDICTED: 101 kDa malaria antigen-like [Bactrocera latifrons]	-	-	-	-	-	-	-
LOC105232331	224	167	407	261	321	79	109	109	95	118	7.26	5.7	12.49	6.36	9.78	1.66	2.52	2.34	1.89	1.85	8.318	2.052	-2.01921	6.23619e-17	2.32944e-15	Nep3	PREDICTED: endothelin-converting enzyme 1 [Bactrocera dorsalis]	-	-	-	-	-	GO:0070011//peptidase activity, acting on L-amino acid peptides	GO:0019538//protein metabolic process
LOC105228515	43	55	39	64	32	11	6	8	11	14	1.58	2.12	1.35	1.77	1.1	0.26	0.16	0.19	0.25	0.23	1.584	0.218	-2.86117	7.40604e-17	2.75763e-15	calu	PREDICTED: 45 kDa calcium-binding protein [Bactrocera dorsalis]	-	-	-	-	-	-	-
LOC105232835	215	222	201	267	218	97	101	159	117	138	42.27	45.9	37.39	39.47	40.26	12.36	14.14	20.73	14.13	13.13	41.058	14.898	-1.46254	7.92113e-17	2.94009e-15	Ctla2a	PREDICTED: protein CTLA-2-alpha [Bactrocera dorsalis]	Cellular Processes;Human Diseases;Cellular Processes;Human Diseases;Cellular Processes;Cellular Processes;Human Diseases;Organismal Systems	Transport and catabolism;Cancers;Transport and catabolism;Cardiovascular diseases;Transport and catabolism;Cell growth and death;Immune diseases;Immune system	ko04142//Lysosome;ko05205//Proteoglycans in cancer;ko04140//Autophagy - animal;ko05418//Fluid shear stress and atherosclerosis;ko04145//Phagosome;ko04210//Apoptosis;ko05323//Rheumatoid arthritis;ko04612//Antigen processing and presentation	K01365;K01365;K01365;K01365;K01365;K01365;K01365;K01365	-	-	-
LOC112694761	102	68	163	134	144	15	23	41	26	48	3.35	2.35	5.07	3.31	4.44	0.32	0.54	0.89	0.52	0.76	3.704	0.606	-2.61169	8.06348e-17	2.97411e-15	Cyp309a1	PREDICTED: probable cytochrome P450 309a1 [Bactrocera dorsalis]	-	-	-	-	-	GO:0005488//binding;GO:0016491//oxidoreductase activity	-
LOC105231434	47	52	82	145	84	23	19	13	25	22	1.02	1.19	1.68	2.37	1.71	0.32	0.29	0.19	0.33	0.23	1.594	0.272	-2.55097	8.43476e-17	3.1013e-15	-	-	-	-	-	-	-	-	-
LOC109579350	98	121	102	158	67	353	401	475	544	583	12.6	16.36	12.41	15.27	8.09	29.4	36.71	40.49	42.96	36.27	12.946	37.166	1.52148	9.17966e-17	3.35415e-15	HPN	PREDICTED: venom serine protease-like, partial [Bactrocera dorsalis]	-	-	-	-	-	GO:0004175//endopeptidase activity	GO:0019538//protein metabolic process
LOC105230527	63	40	187	65	47	8	1	4	6	6	5.32	3.55	14.95	4.13	3.73	0.44	0.06	0.22	0.31	0.25	6.336	0.256	-4.62936	1.1306e-16	4.1055e-15	Arc1	PREDICTED: uncharacterized protein LOC105230527 [Bactrocera dorsalis]	-	-	-	-	-	-	-
LOC105229527	522	413	368	716	447	302	283	245	246	251	36.36	30.25	24.25	37.49	29.25	13.63	14.04	11.32	10.53	8.46	31.52	11.596	-1.44264	2.41394e-16	8.65844e-15	--	CG11892, partial [Drosophila yakuba]	-	-	-	-	-	GO:0016740//transferase activity	-
LOC105226488	70	78	74	81	69	205	267	301	250	421	2.64	3.1	2.64	2.3	2.45	5.01	7.18	7.53	5.8	7.69	2.626	6.642	1.33875	2.57187e-16	9.19679e-15	st	PREDICTED: protein scarlet [Bactrocera dorsalis]	-	-	-	-	-	GO:0017111//nucleoside-triphosphatase activity;GO:0032550//purine ribonucleoside binding	GO:0051234//establishment of localization
LOC105233883	38	61	25	90	48	1	0	0	0	0	4.32	7.29	2.69	7.69	5.12	0.07	0	0	0	0	5.422	0.014	-8.59725	3.71326e-16	1.3158e-14	LCP17	PREDICTED: endocuticle structural glycoprotein ABD-4 [Bactrocera dorsalis]	-	-	-	-	-	-	-
LOC105233485	106	120	117	145	79	45	57	51	51	61	13.4	15.95	13.99	13.78	9.38	3.69	5.13	4.28	3.96	3.73	13.3	4.158	-1.67746	3.92882e-16	1.38382e-14	--	IP04193p [Drosophila melanogaster]	-	-	-	-	-	-	-
LOC105221900	46	39	61	80	73	18	11	15	22	29	7.95	7.08	9.97	10.39	11.84	2.01	1.35	1.72	2.33	2.42	9.446	1.966	-2.26444	3.99737e-16	1.40375e-14	--	PREDICTED: endocuticle structural glycoprotein SgAbd-9 [Bactrocera dorsalis]	-	-	-	-	-	GO:0005214//structural constituent of chitin-based cuticle	GO:0042335//cuticle development
LOC105226914	13	21	22	21	17	86	111	135	134	283	0.67	1.14	1.08	0.82	0.83	2.89	4.1	4.64	4.26	7.09	0.908	4.596	2.33961	4.31912e-16	1.51221e-14	Slc17a8	Vesicular glutamate transporter 3 [Bactrocera dorsalis]	-	-	-	-	GO:0031224//intrinsic component of membrane	-	GO:0006817//phosphate ion transport;GO:0044763//single-organism cellular process
LOC105222353	42	65	51	113	49	0	1	0	0	2	0.47	0.76	0.53	0.94	0.51	0	0.01	0	0	0.01	0.642	0.004	-7.32643	5.18114e-16	1.79792e-14	SERPINB8	PREDICTED: mucin-17 isoform X1 [Bactrocera dorsalis]	-	-	-	-	-	-	-
LOC105232649	539	540	665	617	576	1598	1420	1445	2347	2218	17.64	18.59	20.59	15.18	17.71	33.89	33.1	31.36	47.19	35.13	17.942	36.134	1.01002	5.78437e-16	1.99544e-14	ada2	PREDICTED: adenosine deaminase CECR1-A [Bactrocera dorsalis]	Metabolism;Metabolism	Global and overview maps;Nucleotide metabolism	ko01100//Metabolic pathways;ko00230//Purine metabolism	K19572;K19572	-	-	-
LOC105221995	193	212	245	300	226	109	133	105	129	235	6.77	7.82	8.13	7.91	7.45	2.48	3.32	2.44	2.78	3.99	7.616	3.002	-1.34311	6.79755e-16	2.33808e-14	Sox5	PREDICTED: transcription factor SOX-5-like, partial [Drosophila navojoa]	-	-	-	-	-	-	-
LOC105229437	58	58	81	53	74	222	203	212	282	337	2.63	2.76	3.47	1.81	3.15	6.52	6.55	6.37	7.85	7.39	2.764	6.936	1.32735	1.38696e-15	4.71527e-14	Csad	PREDICTED: cysteine sulfinic acid decarboxylase [Bactrocera dorsalis]	Metabolism;Metabolism	Global and overview maps;Metabolism of other amino acids	ko01100//Metabolic pathways;ko00430//Taurine and hypotaurine metabolism	K01594;K01594	-	GO:0016830//carbon-carbon lyase activity;GO:0043168//anion binding	GO:0043436//oxoacid metabolic process
LOC105226472	52	66	46	69	44	164	259	269	249	411	5.04	6.72	4.22	5.03	4	10.29	17.87	17.28	14.82	19.27	5.002	15.906	1.66899	1.47925e-15	5.0145e-14	--	CG34454, partial [Drosophila busckii]	-	-	-	-	-	-	-
LOC105228666	371	390	676	480	496	1396	1604	1996	1551	2184	39.19	43.32	67.55	38.11	49.21	95.53	120.64	139.79	100.64	111.62	47.476	113.644	1.25925	2.32576e-15	7.81629e-14	--	GL21299 [Drosophila persimilis]	-	-	-	-	-	-	-
LOC105232715	83	71	61	113	74	21	20	29	12	45	2.84	2.56	1.98	2.91	2.38	0.47	0.49	0.66	0.25	0.75	2.534	0.524	-2.27378	2.62523e-15	8.77246e-14	--	PREDICTED: high mobility group nucleosome-binding domain-containing protein 5 isoform X1 [Bactrocera latifrons]	-	-	-	-	-	-	-
LOC105224924	154	81	184	202	246	31	13	54	21	59	4.51	2.5	5.09	4.45	6.76	0.59	0.27	1.05	0.38	0.84	4.662	0.626	-2.89671	3.6398e-15	1.20938e-13	Cyp18a1	PREDICTED: cytochrome P450 18a1 [Bactrocera dorsalis]	Metabolism	Metabolism of terpenoids and polyketides	ko00981//Insect hormone biosynthesis	K14985	-	GO:0016491//oxidoreductase activity;GO:0046906//tetrapyrrole binding;GO:0046914//transition metal ion binding	GO:0044710//single-organism metabolic process
LOC105231035	577	608	848	422	799	2339	2431	2779	2699	3861	99.34	110.08	138.13	54.62	129.22	260.92	298.05	317.25	285.46	321.66	106.278	296.668	1.48101	4.35386e-15	1.44255e-13	--	PREDICTED: general odorant-binding protein 99a [Bactrocera dorsalis]	-	-	-	-	-	-	-
LOC105225839	49	59	73	122	70	241	247	217	236	397	1.51	1.91	2.12	2.82	2.02	4.8	5.4	4.4	4.45	5.9	2.076	4.99	1.26523	5.11338e-15	1.68943e-13	GstZ2	PREDICTED: probable maleylacetoacetate isomerase 2 isoform X1 [Bactrocera cucurbitae]	Metabolism;Metabolism	Global and overview maps;Amino acid metabolism	ko01100//Metabolic pathways;ko00350//Tyrosine metabolism	K01800;K01800	GO:0044424//intracellular part	GO:0016765//transferase activity, transferring alkyl or aryl (other than methyl) groups;GO:0016859//cis-trans isomerase activity	GO:0006558//L-phenylalanine metabolic process;GO:0006570//tyrosine metabolic process;GO:0006790//sulfur compound metabolic process
LOC105233558	108	102	155	139	182	437	373	359	421	632	11.63	11.55	15.79	11.25	18.4	30.48	28.59	25.63	27.84	32.92	13.724	29.092	1.08392	5.53981e-15	1.82007e-13	--	PREDICTED: uncharacterized protein LOC105233558 [Bactrocera dorsalis]	-	-	-	-	-	-	-
LOC105227725	371	337	474	477	265	1074	1072	1269	1487	1503	42.2	40.31	51	40.79	28.31	79.15	86.83	95.7	103.9	82.72	40.522	89.66	1.14576	6.46113e-15	2.10507e-13	GST1	PREDICTED: glutathione S-transferase 1 [Bactrocera dorsalis]	Human Diseases;Human Diseases;Metabolism;Organismal Systems;Human Diseases;Human Diseases;Metabolism;Metabolism;Metabolism;Human Diseases;Human Diseases	Cancers;Cancers;Xenobiotics biodegradation and metabolism;Aging;Cardiovascular diseases;Cancers;Xenobiotics biodegradation and metabolism;Metabolism of other amino acids;Xenobiotics biodegradation and metabolism;Cancers;Drug resistance	ko05200//Pathways in cancer;ko05225//Hepatocellular carcinoma;ko00983//Drug metabolism - other enzymes;ko04212//Longevity regulating pathway - worm;ko05418//Fluid shear stress and atherosclerosis;ko05215//Prostate cancer;ko00980//Metabolism of xenobiotics by cytochrome P450;ko00480//Glutathione metabolism;ko00982//Drug metabolism - cytochrome P450;ko05204//Chemical carcinogenesis;ko01524//Platinu…	K00799;K00799;K00799;K00799;K00799;K00799;K00799;K00799;K00799;K00799;K00799	-	GO:0003824//catalytic activity	-
LOC105226613	226	188	168	271	212	138	115	125	119	108	8.05	7.04	5.66	7.25	7.09	3.18	2.92	2.95	2.6	1.86	7.018	2.702	-1.37703	7.28121e-15	2.35915e-13	Mcm2	PREDICTED: DNA replication licensing factor Mcm2 [Bactrocera dorsalis]	Cellular Processes;Genetic Information Processing	Cell growth and death;Replication and repair	ko04110//Cell cycle;ko03030//DNA replication	K02540;K02540	GO:0043231//intracellular membrane-bounded organelle;GO:0043234//protein complex	GO:0003676//nucleic acid binding;GO:0004386//helicase activity;GO:0032550//purine ribonucleoside binding	GO:0006259//DNA metabolic process;GO:0032392//DNA geometric change
LOC105223787	759	770	1098	800	744	2377	2532	2528	2339	4507	28.15	29.77	37.86	21.11	25	57.98	68.31	63.53	53.99	82.71	28.378	65.304	1.2024	8.75303e-15	2.82045e-13	GPCPD1	PREDICTED: glycerophosphocholine phosphodiesterase GPCPD1 isoform X5 [Bactrocera dorsalis]	-	-	-	-	-	-	-
LOC105225845	27	33	35	50	43	3	9	5	6	15	0.29	0.37	0.36	0.4	0.43	0.02	0.07	0.04	0.04	0.08	0.37	0.05	-2.88753	1.13683e-14	3.62333e-13	--	PREDICTED: serine-rich adhesin for platelets [Bactrocera oleae]	-	-	-	-	-	-	-
LOC105231062	152	111	93	156	145	29	53	29	60	72	13.89	10.81	8.31	10.94	12.31	1.85	3.6	1.91	3.62	3.47	11.252	2.89	-1.96104	1.1508e-14	3.65792e-13	--	PREDICTED: high affinity copper uptake protein 1 isoform X1 [Bactrocera dorsalis]	Human Diseases;Organismal Systems	Drug resistance;Digestive system	ko01524//Platinum drug resistance;ko04978//Mineral absorption	K14686;K14686	-	-	-
LOC105224702	1037	1021	1334	1158	1071	795	668	788	962	880	53.96	55.87	65.67	45.3	52.35	26.8	24.75	27.19	30.75	22.16	54.63	26.33	-1.05299	1.34038e-14	4.24902e-13	Nop60B	H/ACA ribonucleoprotein complex subunit 4, partial [Bactrocera dorsalis]	Genetic Information Processing	Translation	ko03008//Ribosome biogenesis in eukaryotes	K11131	GO:0032991//macromolecular complex;GO:0043231//intracellular membrane-bounded organelle;GO:0043232//intracellular non-membrane-bounded organelle;GO:0044423//virion part	GO:0003676//nucleic acid binding;GO:0016836//hydro-lyase activity;GO:0016866//intramolecular transferase activity	GO:0003006//developmental process involved in reproduction;GO:0007444//imaginal disc development;GO:0009451//RNA modification;GO:0010467//gene expression;GO:0016072//rRNA metabolic process;GO:0022613//ribonucleoprotein complex biogenesis;GO:0030154//cell differentiation;GO:0033554//cellular response to stress
LOC109579562	19	24	14	8	21	94	122	105	130	162	1.97	2.61	1.37	0.62	2.04	6.3	8.99	7.2	8.26	8.11	1.722	7.772	2.1742	1.482e-14	4.66485e-13	to	PREDICTED: protein takeout-like [Bactrocera dorsalis]	-	-	-	-	-	-	-
LOC105226980	73	20	31	77	46	2	1	0	0	1	3.31	0.95	1.33	2.62	1.96	0.06	0.03	0	0	0.02	2.034	0.022	-6.53067	1.69195e-14	5.29198e-13	--	PREDICTED: cuticle protein 16.5 [Bactrocera latifrons]	-	-	-	-	-	-	-
LOC105232313	73	64	36	99	73	27	17	19	12	22	3.69	3.41	1.72	3.77	3.47	0.89	0.61	0.64	0.37	0.54	3.212	0.61	-2.39659	1.90367e-14	5.92258e-13	-	-	-	-	-	-	-	-	-
LOC105225719	12	5	9	13	9	62	70	52	84	142	3.51	1.54	2.49	2.86	2.48	11.76	14.59	10.1	15.11	20.12	2.576	14.336	2.47644	1.91184e-14	5.93225e-13	--	-	-	-	-	-	-	-	-
LOC105222249	3357	3517	5618	4444	3835	2561	2351	2834	3161	3368	153.04	168.59	242.28	152.28	164.2	75.64	76.31	85.66	88.53	74.28	176.078	80.084	-1.13663	1.9386e-14	5.99942e-13	NARS	PREDICTED: asparagine--tRNA ligase, cytoplasmic [Bactrocera dorsalis]	Genetic Information Processing	Translation	ko00970//Aminoacyl-tRNA biosynthesis	K01893	GO:0044424//intracellular part	GO:0004812//aminoacyl-tRNA ligase activity;GO:0032550//purine ribonucleoside binding	GO:0006418//tRNA aminoacylation for protein translation
LOC105233400	32	18	8	24	25	95	176	156	208	249	2.23	1.32	0.53	1.26	1.64	4.3	8.75	7.22	8.92	8.41	1.396	7.52	2.42943	2.16077e-14	6.65348e-13	--	GL16596 [Drosophila persimilis]	-	-	-	-	-	-	-
LOC105233746	62	31	37	85	33	215	266	349	278	280	15.15	7.97	8.56	15.62	7.58	34.05	46.3	56.56	41.74	33.12	10.976	42.354	1.94815	2.36811e-14	7.25211e-13	ANPEP	PREDICTED: aminopeptidase N-like [Bactrocera dorsalis]	Organismal Systems	Endocrine system	ko04614//Renin-angiotensin system	K11141	-	-	-
MSTRG.2080	37	22	21	44	14	0	0	0	0	0	8.74	5.47	4.69	7.82	3.11	0	0	0	0	0	5.966	0.001	-12.5425	3.65472e-14	1.11341e-12	--	PREDICTED: uncharacterized protein LOC106616958 isoform X2 [Bactrocera oleae]	-	-	-	-	-	-	-
LOC105228901	217	202	222	252	275	681	820	638	682	1579	7.41	7.44	7.35	6.52	8.87	15.08	20.04	14.76	14.49	26.51	7.518	18.176	1.27361	3.90667e-14	1.18401e-12	scaf	PREDICTED: serine proteinase stubble [Bactrocera dorsalis]	-	-	-	-	-	GO:0004175//endopeptidase activity	GO:0019538//protein metabolic process
LOC105222113	68	98	73	151	93	37	19	14	5	23	2.4	3.64	2.44	4.01	3.09	0.85	0.48	0.33	0.11	0.39	3.116	0.432	-2.85059	4.36199e-14	1.31521e-12	-	-	-	-	-	-	-	-	-
LOC105230971	552	829	811	1153	898	542	518	414	346	759	4.39	6.98	6.07	6.9	6.69	2.78	2.95	2.17	1.65	2.9	6.206	2.49	-1.31752	5.22833e-14	1.56836e-12	InR	PREDICTED: insulin-like receptor [Bactrocera dorsalis]	Human Diseases;Cellular Processes;Human Diseases;Environmental Information Processing;Environmental Information Processing;Human Diseases;Environmental Information Processing;Cellular Processes;Environmental Information Processing;Cellular Processes;Environmental Information Processing;Cellular Processes;Human Diseases;Environmental Information Processing;Environmental Information Processing;Envi…	Cancers;Transport and catabolism;Cancers;Signal transduction;Signal transduction;Cancers;Signal transduction;Transport and catabolism;Signal transduction;Cellular community - eukaryotes;Signal transduction;Cell growth and death;Cancers;Signal transduction;Signal transduction;Signal transduction;Endocrine system;Cancers;Aging;Cellular community - eukaryotes;Aging;Cellular community - eukaryotes;Ca…	ko05200//Pathways in cancer;ko04144//Endocytosis;ko05205//Proteoglycans in cancer;ko04150//mTOR signaling pathway;ko04151//PI3K-Akt signaling pathway;ko05225//Hepatocellular carcinoma;ko04010//MAPK signaling pathway;ko04140//Autophagy - animal;ko04014//Ras signaling pathway;ko04510//Focal adhesion;ko04015//Rap1 signaling pathway;ko04114//Oocyte meiosis;ko05215//Prostate cancer;ko04068//FoxO signa…	K05087;K05087;K05087;K05087;K05087;K05087;K05087;K05087;K05087;K05087;K05087;K05087;K05087;K05087;K05087;K05087;K05087;K05087;K05087;K05087;K05087;K05087;K05087;K05087;K05087;K05087;K05087;K05087;K05087	GO:0031224//intrinsic component of membrane	GO:0004672//protein kinase activity;GO:0032550//purine ribonucleoside binding	GO:0006468//protein phosphorylation;GO:0007167//enzyme linked receptor protein signaling pathway
LOC105225697	41	25	19	39	32	1	0	0	0	0	2.67	1.71	1.17	1.91	1.96	0.04	0	0	0	0	1.884	0.008	-7.87958	9.42011e-14	2.78309e-12	--	PREDICTED: uncharacterized transmembrane protein DDB_G0289901-like [Bactrocera dorsalis]	-	-	-	-	-	-	-
LOC105229374	298	334	351	434	362	886	739	977	1442	1525	15.39	18.14	17.15	16.85	17.56	29.64	27.17	33.45	45.74	38.1	17.018	34.82	1.03285	1.04142e-13	3.05369e-12	acsf2	PREDICTED: LOW QUALITY PROTEIN: acyl-CoA synthetase family member 2, mitochondrial-like [Bactrocera dorsalis]	-	-	-	-	-	-	-
LOC105230669	347	365	389	372	336	222	242	268	290	320	25.14	27.81	26.66	20.26	22.87	10.42	12.49	12.87	12.91	11.22	24.548	11.982	-1.03474	1.15866e-13	3.38901e-12	RnrS	PREDICTED: ribonucleoside-diphosphate reductase subunit M2 [Bactrocera dorsalis]	Metabolism;Metabolism;Metabolism;Metabolism;Metabolism;Cellular Processes	Global and overview maps;Nucleotide metabolism;Xenobiotics biodegradation and metabolism;Nucleotide metabolism;Metabolism of other amino acids;Cell growth and death	ko01100//Metabolic pathways;ko00230//Purine metabolism;ko00983//Drug metabolism - other enzymes;ko00240//Pyrimidine metabolism;ko00480//Glutathione metabolism;ko04115//p53 signaling pathway	K10808;K10808;K10808;K10808;K10808;K10808	GO:0044444//cytoplasmic part	GO:0016728//oxidoreductase activity, acting on CH or CH2 groups, disulfide as acceptor	GO:0006259//DNA metabolic process;GO:0009132//nucleoside diphosphate metabolic process;GO:0030154//cell differentiation;GO:0043280//positive regulation of cysteine-type endopeptidase activity involved in apoptotic process
LOC105231754	421	306	647	474	435	264	229	236	248	386	8.94	6.84	13.01	7.57	8.68	3.63	3.46	3.32	3.24	3.97	9.008	3.524	-1.35399	1.34937e-13	3.92722e-12	l(2)03659	PREDICTED: LOW QUALITY PROTEIN: probable multidrug resistance-associated protein lethal(2)03659 [Bactrocera dorsalis]	-	-	-	-	GO:0031224//intrinsic component of membrane	GO:0015405//P-P-bond-hydrolysis-driven transmembrane transporter activity;GO:0017111//nucleoside-triphosphatase activity;GO:0032550//purine ribonucleoside binding	GO:0044763//single-organism cellular process;GO:0051234//establishment of localization
LOC105225577	805	1095	940	1356	1165	650	575	527	392	1063	16.08	22.41	17.44	20.42	21.89	8.64	8.1	6.86	4.94	10.3	19.648	7.768	-1.33877	1.43077e-13	4.13336e-12	Pdk1	PREDICTED: 3-phosphoinositide-dependent protein kinase 1 isoform X1 [Bactrocera dorsalis]	Human Diseases;Environmental Information Processing;Environmental Information Processing;Cellular Processes;Cellular Processes;Organismal Systems;Environmental Information Processing;Organismal Systems;Human Diseases;Environmental Information Processing;Cellular Processes;Environmental Information Processing;Human Diseases;Human Diseases;Human Diseases;Organismal Systems;Organismal Systems;Human …	Cancers;Signal transduction;Signal transduction;Transport and catabolism;Cellular community - eukaryotes;Endocrine system;Signal transduction;Endocrine system;Cancers;Signal transduction;Cell growth and death;Signal transduction;Cancers;Endocrine and metabolic diseases;Drug resistance;Nervous system;Endocrine system;Infectious diseases;Immune system;Cancers;Immune system;Infectious diseases;Excre…	ko05205//Proteoglycans in cancer;ko04150//mTOR signaling pathway;ko04151//PI3K-Akt signaling pathway;ko04140//Autophagy - animal;ko04510//Focal adhesion;ko04919//Thyroid hormone signaling pathway;ko04071//Sphingolipid signaling pathway;ko04910//Insulin signaling pathway;ko05215//Prostate cancer;ko04068//FoxO signaling pathway;ko04210//Apoptosis;ko04152//AMPK signaling pathway;ko05231//Choline met…	K06276;K06276;K06276;K06276;K06276;K06276;K06276;K06276;K06276;K06276;K06276;K06276;K06276;K06276;K06276;K06276;K06276;K06276;K06276;K06276;K06276;K06276;K06276;K06276	-	GO:0004672//protein kinase activity;GO:0032550//purine ribonucleoside binding	GO:0006464//cellular protein modification process;GO:0006796//phosphate-containing compound metabolic process
LOC105234251	142	138	160	224	155	125	69	61	61	115	2.36	2.42	2.52	2.8	2.42	1.35	0.82	0.67	0.62	0.93	2.504	0.878	-1.51194	1.59033e-13	4.57181e-12	-	-	-	-	-	-	-	-	-
LOC105228753	33	37	18	50	42	132	217	157	289	234	2.1	2.49	1.11	2.31	2.38	5.36	9.9	6.63	11.46	7.27	2.078	8.124	1.96699	2.34578e-13	6.66191e-12	Rerg	PREDICTED: ras-related and estrogen-regulated growth inhibitor isoform X1 [Bactrocera dorsalis]	-	-	-	-	GO:0044464//cell part	GO:0032550//purine ribonucleoside binding	GO:0008104//protein localization;GO:0035556//intracellular signal transduction
LOC105223680	3895	2461	2938	4425	2968	2255	2361	2183	2444	2482	350.29	232.75	249.98	299.18	250.73	131.4	151.21	130.18	135.03	108.01	276.586	131.166	-1.07633	2.41408e-13	6.83932e-12	PNLIPRP2	PREDICTED: vitellogenin-1-like [Bactrocera dorsalis]	-	-	-	-	-	-	-
LOC115066575	95	89	130	135	114	53	60	70	44	89	3.5	3.45	4.53	3.74	3.95	1.27	1.57	1.71	1	1.59	3.834	1.428	-1.42485	2.71504e-13	7.63661e-12	--	beat-Ib, partial [Drosophila busckii]	-	-	-	-	-	-	-
LOC105226239	6	2	4	6	2	39	49	39	52	54	0.37	0.13	0.23	0.28	0.11	1.54	2.13	1.58	1.95	1.6	0.224	1.76	2.974	3.39324e-13	9.47602e-12	-	-	-	-	-	-	-	-	-
LOC105227910	146	114	156	162	137	64	88	51	97	87	4.3	3.53	4.35	3.59	3.79	1.22	1.85	1	1.75	1.24	3.912	1.412	-1.47017	4.61247e-13	1.27895e-11	in	PREDICTED: protein inturned [Bactrocera dorsalis]	-	-	-	-	-	-	-
LOC105233914	326	432	555	476	327	1179	1080	1198	1309	2105	16.26	22.66	26.19	17.85	15.32	38.1	38.35	39.61	40.1	50.8	19.656	41.392	1.07438	4.75857e-13	1.31635e-11	--	PREDICTED: cell wall protein IFF6 [Bactrocera dorsalis]	-	-	-	-	-	-	-
LOC105227993	149	441	458	626	425	3623	4175	2795	6267	2503	18.23	56.74	53.02	57.58	48.85	287.22	363.77	226.76	471.07	148.19	46.884	299.402	2.67492	4.87582e-13	1.34095e-11	--	PREDICTED: dopamine N-acetyltransferase [Bactrocera dorsalis]	-	-	-	-	-	-	-
LOC105223718	49	46	79	61	65	26	23	26	26	29	4.07	4.02	6.2	3.81	5.07	1.4	1.36	1.43	1.33	1.16	4.634	1.336	-1.79434	5.16724e-13	1.41274e-11	Trex1	PREDICTED: LOW QUALITY PROTEIN: three-prime repair exonuclease 1 [Bactrocera dorsalis]	Organismal Systems	Immune system	ko04623//Cytosolic DNA-sensing pathway	K10790	-	GO:0004518//nuclease activity	GO:0090304//nucleic acid metabolic process
LOC105232222	99	87	104	147	118	50	59	46	67	104	14.03	12.97	13.94	15.66	15.71	4.59	5.95	4.32	5.83	7.13	14.462	5.564	-1.37807	5.51584e-13	1.50173e-11	--	PREDICTED: apoptosis-inducing factor 3-like [Bactrocera dorsalis]	-	-	-	-	-	-	-
LOC105230711	57	78	87	79	86	200	229	244	233	392	3.79	5.45	5.47	3.95	5.37	8.61	10.83	10.75	9.51	12.6	4.806	10.46	1.12197	5.8709e-13	1.59029e-11	Tat	PREDICTED: tyrosine aminotransferase [Bactrocera dorsalis]	Metabolism;Metabolism;Metabolism;Metabolism;Metabolism;Metabolism;Metabolism	Global and overview maps;Global and overview maps;Amino acid metabolism;Amino acid metabolism;Metabolism of cofactors and vitamins;Amino acid metabolism;Amino acid metabolism	ko01100//Metabolic pathways;ko01230//Biosynthesis of amino acids;ko00270//Cysteine and methionine metabolism;ko00350//Tyrosine metabolism;ko00130//Ubiquinone and other terpenoid-quinone biosynthesis;ko00360//Phenylalanine metabolism;ko00400//Phenylalanine, tyrosine and tryptophan biosynthesis	K00815;K00815;K00815;K00815;K00815;K00815;K00815	-	GO:0043168//anion binding;GO:0070546//L-phenylalanine aminotransferase activity;GO:0070547//L-tyrosine aminotransferase activity	GO:0006520//cellular amino acid metabolic process
LOC105224717	36	20	21	33	24	2	2	0	5	1	1.13	0.64	0.72	0.77	0.72	0.04	0.04	0	0.11	0.02	0.796	0.042	-4.24431	7.78714e-13	2.09485e-11	--	GH20979 [Drosophila grimshawi]	-	-	-	-	-	-	-
LOC105233819	52	55	72	56	37	170	175	259	274	348	11.17	12.43	14.64	9.05	7.47	23.67	26.78	36.9	36.17	36.18	10.952	31.94	1.54417	8.37298e-13	2.23197e-11	hgo	PREDICTED: homogentisate 1,2-dioxygenase-like [Bactrocera dorsalis]	Metabolism;Metabolism	Global and overview maps;Amino acid metabolism	ko01100//Metabolic pathways;ko00350//Tyrosine metabolism	K00451;K00451	-	-	GO:0006558//L-phenylalanine metabolic process
LOC105227310	58	57	61	92	69	39	31	31	42	44	1.78	1.84	1.77	2.13	1.99	0.78	0.68	0.63	0.79	0.65	1.902	0.706	-1.42978	1.06253e-12	2.82595e-11	DAT	PREDICTED: sodium-dependent dopamine transporter [Bactrocera dorsalis]	Human Diseases;Organismal Systems;Human Diseases;Human Diseases;Human Diseases	Neurodegenerative diseases;Nervous system;Substance dependence;Substance dependence;Substance dependence	ko05012//Parkinson disease;ko04728//Dopaminergic synapse;ko05034//Alcoholism;ko05031//Amphetamine addiction;ko05030//Cocaine addiction	K05036;K05036;K05036;K05036;K05036	GO:0031224//intrinsic component of membrane	GO:0015291//secondary active transmembrane transporter activity	GO:0044763//single-organism cellular process;GO:0044765//single-organism transport
LOC105222290	39	45	66	110	74	318	197	205	243	303	1.64	1.99	2.62	3.47	2.92	8.66	5.89	5.71	6.27	6.16	2.528	6.538	1.37085	1.22811e-12	3.24425e-11	--	PREDICTED: caprin homolog [Bactrocera dorsalis]	-	-	-	-	-	-	-
LOC105229310	15	16	17	20	17	59	75	87	77	107	0.5	0.56	0.53	0.5	0.53	1.26	1.77	1.91	1.56	1.71	0.524	1.642	1.64782	1.40924e-12	3.71438e-11	GRIK1	PREDICTED: glutamate receptor ionotropic, kainate 2 [Bactrocera dorsalis]	-	-	-	-	GO:0031224//intrinsic component of membrane;GO:0097060//synaptic membrane	GO:0005231//excitatory extracellular ligand-gated ion channel activity	GO:0006811//ion transport;GO:0007215//glutamate receptor signaling pathway
LOC105227566	314	358	324	508	330	225	210	207	164	397	7.61	9.12	7.43	9.26	7.51	3.53	3.62	3.33	2.44	4.66	8.186	3.516	-1.21922	1.55464e-12	4.08461e-11	Ets98B	PREDICTED: DNA-binding protein D-ETS-4 isoform X1 [Bactrocera dorsalis]	-	-	-	-	-	-	-
LOC105223655	16	50	33	50	53	378	141	175	264	339	0.96	3.14	1.86	2.24	2.97	14.62	5.99	6.93	9.68	9.79	2.234	9.402	2.07334	2.30547e-12	5.95613e-11	-	-	-	-	-	-	-	-	-
LOC105231166	1	2	3	0	0	24	45	53	75	121	0.08	0.17	0.23	0	0	1.25	2.57	2.82	3.69	4.69	0.096	3.004	4.96771	2.4636e-12	6.33675e-11	AGAP009593	PREDICTED: zinc carboxypeptidase [Bactrocera dorsalis]	-	-	-	-	-	-	-
LOC105223744	303	254	384	444	284	206	224	241	221	348	22.84	20.13	27.38	25.16	20.11	10.06	12.02	12.04	10.23	12.69	23.124	11.408	-1.01935	2.70197e-12	6.88943e-11	bwa	PREDICTED: alkaline ceramidase [Bactrocera dorsalis]	Metabolism;Environmental Information Processing;Metabolism	Global and overview maps;Signal transduction;Lipid metabolism	ko01100//Metabolic pathways;ko04071//Sphingolipid signaling pathway;ko00600//Sphingolipid metabolism	K01441;K01441;K01441	GO:0031224//intrinsic component of membrane;GO:0043231//intracellular membrane-bounded organelle	GO:0016811//hydrolase activity, acting on carbon-nitrogen (but not peptide) bonds, in linear amides	GO:0006672//ceramide metabolic process
LOC105233415	52	49	48	62	59	152	134	192	158	214	1.19	1.18	1.04	1.07	1.27	2.26	2.19	2.92	2.23	2.37	1.15	2.394	1.05779	3.04362e-12	7.7103e-11	ift122	Intraflagellar transport protein 122-like protein, partial [Bactrocera dorsalis]	-	-	-	-	-	-	-
LOC105223797	408	644	672	490	317	176	151	260	230	321	25.44	42.66	40.05	22.61	18.69	7.19	6.58	10.8	8.91	9.62	29.89	8.62	-1.7939	3.09886e-12	7.83331e-11	--	PREDICTED: chitin biosynthesis protein CHS5-like isoform X1 [Bactrocera oleae]	-	-	-	-	-	-	-
LOC105226518	462	413	788	660	614	280	310	400	351	510	32.3	30.34	52.65	35.07	40.23	12.86	15.68	18.64	15.42	17.65	38.118	16.05	-1.2479	3.36194e-12	8.48003e-11	--	PREDICTED: serine protease Hayan [Bactrocera dorsalis]	-	-	-	-	-	-	-
LOC105227488	105	75	235	177	231	30	29	63	39	73	13.53	10.16	28.65	17.15	27.96	2.5	2.66	5.38	3.09	4.55	19.49	3.636	-2.42231	3.48768e-12	8.74082e-11	SPCC285.04	PREDICTED: 5-hydroxyisourate hydrolase [Bactrocera dorsalis]	Metabolism;Metabolism	Global and overview maps;Nucleotide metabolism	ko01100//Metabolic pathways;ko00230//Purine metabolism	K07127;K07127	-	-	-
LOC105227880	188	166	183	289	200	160	121	94	162	163	9.24	8.58	8.51	10.68	9.23	5.1	4.24	3.06	4.89	3.88	9.248	4.234	-1.12712	3.65187e-12	9.11335e-11	mfsd8	PREDICTED: major facilitator superfamily domain-containing protein 8 [Bactrocera dorsalis]	Cellular Processes	Transport and catabolism	ko04142//Lysosome	K12307	-	-	GO:0044763//single-organism cellular process
LOC105232726	283	252	384	408	222	146	148	197	216	205	14.04	13.15	18.02	15.22	10.35	4.69	5.23	6.48	6.58	4.92	14.156	5.58	-1.34308	4.20246e-12	1.04208e-10	ASN2	PREDICTED: asparagine synthetase [glutamine-hydrolyzing] 2 [Bactrocera dorsalis]	Metabolism;Metabolism	Global and overview maps;Amino acid metabolism	ko01100//Metabolic pathways;ko00250//Alanine, aspartate and glutamate metabolism	K01953;K01953	-	GO:0016884//carbon-nitrogen ligase activity, with glutamine as amido-N-donor;GO:0032550//purine ribonucleoside binding	GO:0006529//asparagine biosynthetic process
LOC105222977	782	552	595	1014	677	414	412	407	463	821	31.77	23.58	22.87	30.97	25.84	10.9	11.92	10.96	11.56	16.14	27.006	12.296	-1.13509	5.56219e-12	1.36198e-10	-	-	-	-	-	-	-	-	-
MSTRG.13031	15	12	10	15	12	71	82	54	79	69	0.57	0.47	0.35	0.44	0.47	1.72	2.32	1.53	1.97	1.38	0.46	1.784	1.95541	8.05505e-12	1.95202e-10	RDH12	retinol dehydrogenase 12 [Scaptodrosophila lebanonensis]	-	-	-	-	-	GO:0016229//steroid dehydrogenase activity;GO:0016616//oxidoreductase activity, acting on the CH-OH group of donors, NAD or NADP as acceptor	GO:0044710//single-organism metabolic process
LOC105226111	1184	2506	1615	2218	2052	5574	4991	6947	8350	7678	59.02	131.36	76.16	83.12	96.08	180.02	177.16	229.61	255.69	185.19	89.148	205.534	1.2051	1.00927e-11	2.41585e-10	Alp-m	PREDICTED: alkaline phosphatase [Bactrocera dorsalis]	Metabolism;Metabolism;Metabolism	Global and overview maps;Metabolism of cofactors and vitamins;Metabolism of cofactors and vitamins	ko01100//Metabolic pathways;ko00790//Folate biosynthesis;ko00730//Thiamine metabolism	K01077;K01077;K01077	-	GO:0016791//phosphatase activity	GO:0006796//phosphate-containing compound metabolic process
LOC105226928	363	565	549	884	646	449	331	263	256	497	4.56	7.48	6.54	8.37	7.64	3.66	2.97	2.19	1.97	3.02	6.918	2.762	-1.32464	1.37913e-11	3.25469e-10	Nfat5	PREDICTED: nuclear factor of activated T-cells 5 isoform X1 [Bactrocera dorsalis]	-	-	-	-	-	-	-
LOC105223550	65	51	100	99	135	37	25	41	37	44	4.65	3.83	6.76	5.32	9.06	1.71	1.27	1.94	1.62	1.52	5.924	1.612	-1.87772	1.40015e-11	3.29766e-10	Dnase2	PREDICTED: deoxyribonuclease-2-alpha [Bactrocera dorsalis]	Cellular Processes	Transport and catabolism	ko04142//Lysosome	K01158	-	-	-
LOC105228511	155	165	295	184	148	567	611	668	611	1062	3.92	4.39	7.06	3.5	3.52	9.3	11.01	11.21	9.5	13	4.478	10.804	1.27064	1.51686e-11	3.55826e-10	CFH	Sushi, von Willebrand factor type A, EGF and pentraxin domain-containing protein 1, partial [Bactrocera dorsalis]	-	-	-	-	-	GO:0004857//enzyme inhibitor activity	GO:0045861//negative regulation of proteolysis
LOC105223836	4836	6229	8023	9911	7854	4646	5501	4266	4358	8155	231.32	313.33	363.07	356.4	352.88	143.99	187.38	135.3	128.06	188.75	323.4	156.696	-1.04535	1.63429e-11	3.82607e-10	--	PREDICTED: silent chromatin protein ESC1-like isoform X1 [Bactrocera oleae]	-	-	-	-	-	-	-
LOC105230977	34	22	40	34	28	4	0	10	3	6	1.86	1.26	2.07	1.4	1.44	0.14	0	0.36	0.1	0.16	1.606	0.152	-3.40133	1.99585e-11	4.65394e-10	Cyp313a4	PREDICTED: probable cytochrome P450 313a4 [Bactrocera dorsalis]	-	-	-	-	-	-	-
MSTRG.5190	70	46	44	58	25	190	303	196	426	312	7.72	5.34	4.59	4.81	2.59	13.58	23.8	14.34	28.87	16.66	5.01	19.45	1.95689	2.27272e-11	5.28903e-10	--	-	-	-	-	-	-	-	-
LOC105221917	131	219	200	295	239	502	644	553	599	988	11.17	19.63	16.13	18.91	19.14	27.73	39.1	31.26	31.37	40.76	16.996	34.044	1.00221	2.57176e-11	5.93782e-10	F40A3.3	PREDICTED: protein D3-like [Bactrocera dorsalis]	-	-	-	-	-	-	-
LOC105233444	461	386	636	555	493	360	311	416	301	468	26.16	23.03	34.15	23.68	26.28	13.24	12.57	15.65	10.49	12.85	26.66	12.96	-1.04061	3.08776e-11	7.07351e-10	--	PREDICTED: LOW QUALITY PROTEIN: anosmin-1 [Bactrocera dorsalis]	-	-	-	-	-	GO:0004857//enzyme inhibitor activity	GO:0045861//negative regulation of proteolysis
LOC105226474	493	554	753	970	692	494	399	443	317	732	13.39	16.06	18.09	17.45	16.12	8.16	7.31	7.82	5.48	9.29	16.222	7.612	-1.0916	3.22896e-11	7.35387e-10	--	PREDICTED: A-agglutinin anchorage subunit [Bactrocera oleae]	-	-	-	-	-	-	-
LOC105231090	107	118	89	191	132	93	52	38	49	68	19.58	22.64	15.42	26.17	22.58	11.04	6.82	4.59	5.54	6.01	21.278	6.8	-1.64576	3.82969e-11	8.6548e-10	--	PREDICTED: metallothionein-1-like [Bactrocera dorsalis]	-	-	-	-	-	-	-
LOC105227212	180	113	171	162	206	125	79	84	93	103	8.3	5.5	6.91	5.36	8.81	3.69	2.47	2.43	2.51	2.25	6.976	2.67	-1.38556	4.26527e-11	9.58379e-10	AGXT2	PREDICTED: alanine--glyoxylate aminotransferase 2, mitochondrial isoform X1 [Bactrocera dorsalis]	Metabolism;Metabolism;Metabolism;Metabolism;Metabolism	Global and overview maps;Amino acid metabolism;Amino acid metabolism;Amino acid metabolism;Amino acid metabolism	ko01100//Metabolic pathways;ko00270//Cysteine and methionine metabolism;ko00280//Valine, leucine and isoleucine degradation;ko00260//Glycine, serine and threonine metabolism;ko00250//Alanine, aspartate and glutamate metabolism	K00827;K00827;K00827;K00827;K00827	-	-	-
LOC105230165	25	24	20	41	27	3	8	5	5	11	0.35	0.34	0.25	0.39	0.32	0.03	0.08	0.05	0.04	0.07	0.33	0.054	-2.61143	4.27944e-11	9.59724e-10	--	PREDICTED: cell wall protein DAN4 isoform X1 [Bactrocera dorsalis]	-	-	-	-	-	-	-
LOC105233535	90	74	81	129	67	39	44	33	30	74	2.25	1.94	1.91	2.42	1.57	0.63	0.78	0.55	0.46	0.89	2.018	0.662	-1.60802	4.46626e-11	9.9971e-10	--	Atrial natriuretic peptide-converting enzyme, partial [Bactrocera dorsalis]	-	-	-	-	-	GO:0016798//hydrolase activity, acting on glycosyl bonds	GO:0006022//aminoglycan metabolic process
LOC105225550	102	108	100	126	111	92	66	53	59	71	3.67	4.08	3.4	3.4	3.75	2.14	1.69	1.26	1.3	1.23	3.66	1.524	-1.26398	4.59491e-11	1.02265e-09	TMEM201	Transmembrane protein 201 [Bactrocera dorsalis]	-	-	-	-	-	-	-
LOC105231070	177	217	301	306	301	218	145	122	150	229	3.57	4.6	5.74	4.64	5.7	2.85	2.08	1.63	1.86	2.23	4.85	2.13	-1.18713	6.39783e-11	1.40525e-09	Pprc1	Peroxisome proliferator-activated receptor gamma coactivator-related protein 1, partial [Ceratitis capitata]	-	-	-	-	-	GO:0097159//organic cyclic compound binding	-
LOC105224873	44	40	56	81	58	132	162	190	171	280	3.1	2.96	3.73	4.28	3.83	6.02	8.12	8.86	7.39	9.53	3.58	7.984	1.15715	6.84102e-11	1.49698e-09	FAH	Fumarylacetoacetase, partial [Bactrocera dorsalis]	Metabolism;Metabolism	Global and overview maps;Amino acid metabolism	ko01100//Metabolic pathways;ko00350//Tyrosine metabolism	K01555;K01555	-	GO:0016823//hydrolase activity, acting on acid carbon-carbon bonds, in ketonic substances	GO:0006520//cellular amino acid metabolic process
LOC105225180	983	758	962	1021	749	458	433	747	613	669	104.09	84.48	96.4	81.3	74.49	31.36	32.63	52.4	39.87	34.22	88.152	38.096	-1.21035	7.06421e-11	1.53437e-09	pho2	PREDICTED: 4-nitrophenylphosphatase-like isoform X1 [Bactrocera dorsalis]	Metabolism	Metabolism of terpenoids and polyketides	ko00981//Insect hormone biosynthesis	K21013	-	-	-
LOC105227486	271	285	485	456	351	234	230	169	151	344	6	6.64	10.24	7.53	7.27	3.29	3.58	2.47	2.06	3.72	7.536	3.024	-1.31734	7.15448e-11	1.55111e-09	Ptprq	Cytokine receptor [Bactrocera dorsalis]	-	-	-	-	-	-	-
MSTRG.2174	75	88	133	103	58	41	27	39	42	59	13.83	17.06	23.2	14.28	10.05	4.9	3.55	4.77	4.76	5.26	15.684	4.648	-1.75461	7.67912e-11	1.65872e-09	--	PREDICTED: putative glycine-rich cell wall structural protein 1 [Rhagoletis zephyria]	-	-	-	-	-	-	-
LOC105226970	317	313	504	410	471	194	224	310	257	300	10	10.38	15.04	9.72	13.95	3.96	5.03	6.48	4.98	4.57	11.818	5.004	-1.23983	8.25621e-11	1.77357e-09	psh	PREDICTED: serine protease Hayan-like [Bactrocera dorsalis]	-	-	-	-	-	-	-
LOC105231131	267	230	352	344	355	162	187	247	188	299	38.25	34.65	47.7	37.04	47.77	15.04	19.07	23.46	16.54	20.72	41.082	18.966	-1.11509	1.1075e-10	2.3575e-09	--	GL18895 [Drosophila persimilis]	-	-	-	-	-	-	-
LOC105231664	249	282	434	338	287	191	159	248	174	236	15.79	18.8	26.03	16.11	17.09	7.85	7.18	10.43	6.78	7.24	18.764	7.896	-1.24877	1.24475e-10	2.62585e-09	PGRP-LB	PREDICTED: LOW QUALITY PROTEIN: peptidoglycan-recognition protein LB [Bactrocera dorsalis]	Organismal Systems	Immune system	ko04624//Toll and Imd signaling pathway	K01446	-	GO:0016811//hydrolase activity, acting on carbon-nitrogen (but not peptide) bonds, in linear amides;GO:0046914//transition metal ion binding	GO:0000270//peptidoglycan metabolic process;GO:0006952//defense response
LOC105224325	8	19	19	24	17	78	89	67	94	218	0.82	2.05	1.84	1.85	1.63	5.17	6.49	4.55	5.91	10.8	1.638	6.584	2.00703	1.34767e-10	2.82264e-09	TM_0325	PREDICTED: uncharacterized oxidoreductase TM_0325-like [Bactrocera oleae]	-	-	-	-	-	-	-
LOC105234180	78	68	109	86	91	209	284	240	266	475	10.4	9.54	13.75	8.62	11.4	18.06	26.98	21.23	21.8	30.66	10.742	23.746	1.14442	1.35554e-10	2.83406e-09	-	-	-	-	-	-	-	-	-
LOC105227818	4	1	3	10	14	117	70	46	85	62	0.15	0.04	0.11	0.28	0.49	2.81	1.85	1.13	1.94	1.11	0.214	1.768	3.04644	1.37605e-10	2.87183e-09	ATP6V0A1	PREDICTED: V-type proton ATPase 116 kDa subunit a [Bactrocera dorsalis]	Metabolism;Human Diseases;Metabolism;Cellular Processes;Cellular Processes;Human Diseases;Human Diseases;Organismal Systems;Human Diseases;Human Diseases;Organismal Systems	Global and overview maps;Infectious diseases;Energy metabolism;Transport and catabolism;Transport and catabolism;Infectious diseases;Infectious diseases;Nervous system;Infectious diseases;Immune diseases;Excretory system	ko01100//Metabolic pathways;ko05165//Human papillomavirus infection;ko00190//Oxidative phosphorylation;ko04142//Lysosome;ko04145//Phagosome;ko05152//Tuberculosis;ko05110//Vibrio cholerae infection;ko04721//Synaptic vesicle cycle;ko05120//Epithelial cell signaling in Helicobacter pylori infection;ko05323//Rheumatoid arthritis;ko04966//Collecting duct acid secretion	K02154;K02154;K02154;K02154;K02154;K02154;K02154;K02154;K02154;K02154;K02154	GO:0033177//proton-transporting two-sector ATPase complex, proton-transporting domain	GO:0015077//monovalent inorganic cation transmembrane transporter activity	GO:0015988//energy coupled proton transmembrane transport, against electrochemical gradient
LOC105227658	66	64	69	80	74	231	185	237	146	300	3.43	3.48	3.38	3.11	3.62	7.74	6.8	8.06	4.65	7.5	3.404	6.95	1.02978	2.00901e-10	4.12674e-09	Tret1	PREDICTED: facilitated trehalose transporter Tret1-2 homolog [Bactrocera dorsalis]	-	-	-	-	GO:0031224//intrinsic component of membrane	GO:0022857//transmembrane transporter activity	GO:0044763//single-organism cellular process;GO:0051234//establishment of localization
LOC105227882	0	0	0	0	0	25	29	22	13	28	0	0	0	0	0	1.68	2.14	1.51	0.83	1.4	0.001	1.512	10.5622	2.0136e-10	4.12894e-09	SDR-1	PREDICTED: farnesol dehydrogenase-like [Bactrocera dorsalis]	Metabolism;Metabolism	Metabolism of terpenoids and polyketides;Metabolism of terpenoids and polyketides	ko00981//Insect hormone biosynthesis;ko00900//Terpenoid backbone biosynthesis	K15890;K15890	-	-	-
LOC105225396	267	200	341	362	386	187	222	169	221	304	8.51	6.72	10.28	8.68	11.56	3.86	5.04	3.58	4.33	4.69	9.15	4.3	-1.08944	2.39603e-10	4.879e-09	SLC16A14	PREDICTED: monocarboxylate transporter 3 [Drosophila arizonae]	-	-	-	-	-	-	GO:0044763//single-organism cellular process
LOC105234183	23	25	17	41	28	0	1	5	2	9	2.37	2.71	1.66	3.18	2.71	0	0.07	0.34	0.13	0.45	2.526	0.198	-3.67328	2.46399e-10	5.00869e-09	--	PREDICTED: protein takeout [Bactrocera dorsalis]	-	-	-	-	-	-	-
LOC105223477	410	662	1104	588	702	310	168	346	371	431	59.94	101.77	152.69	64.62	96.4	29.36	17.49	33.54	33.32	30.49	95.084	28.84	-1.72113	2.70127e-10	5.45321e-09	--	PREDICTED: lectin subunit alpha-like [Bactrocera dorsalis]	-	-	-	-	-	-	-
LOC105221842	154	158	160	195	134	115	115	120	82	137	6.58	7.13	6.76	6.53	5.55	3.25	3.55	3.44	2.31	2.9	6.51	3.09	-1.07505	2.84534e-10	5.72436e-09	fng	PREDICTED: fringe glycosyltransferase isoform X1 [Bactrocera dorsalis]	Human Diseases;Environmental Information Processing;Metabolism	Infectious diseases;Signal transduction;Glycan biosynthesis and metabolism	ko05165//Human papillomavirus infection;ko04330//Notch signaling pathway;ko00514//Other types of O-glycan biosynthesis	K05948;K05948;K05948	GO:0031228//intrinsic component of Golgi membrane	GO:0008375//acetylglucosaminyltransferase activity	-
LOC105225770	117	86	77	172	132	434	264	321	324	441	5.61	4.33	3.45	6.17	5.74	13.43	8.72	10.14	9.36	10.14	5.06	10.358	1.03354	3.10032e-10	6.2054e-09	SLC26A11	PREDICTED: sodium-independent sulfate anion transporter isoform X1 [Bactrocera dorsalis]	-	-	-	-	GO:0031224//intrinsic component of membrane	GO:0015103//inorganic anion transmembrane transporter activity	GO:0008272//sulfate transport;GO:0044763//single-organism cellular process
LOC109579734	0	0	3	0	0	35	38	35	58	48	0	0	0.45	0	0	3.61	4.31	3.7	5.68	3.7	0.09	4.2	5.54432	3.15617e-10	6.30642e-09	--	PREDICTED: uncharacterized protein LOC109579734 [Bactrocera dorsalis]	-	-	-	-	-	-	-
LOC105233810	4297	1910	2485	2351	4334	10614	10825	12202	11816	14730	250.37	117.03	136.99	102.98	237.21	400.71	449.16	471.44	422.96	415.31	168.916	431.916	1.35444	3.98947e-10	7.93093e-09	Cyp6g2	probable cytochrome P450 6g2 [Bactrocera dorsalis]	-	-	-	-	-	-	-
LOC105224532	25	8	21	22	27	72	89	179	127	176	3.46	1.17	2.75	2.22	3.51	6.47	8.57	16.45	10.76	11.73	2.622	10.796	2.04176	4.08375e-10	8.10461e-09	PLA2	PREDICTED: phospholipase A2 [Bactrocera dorsalis]	Metabolism;Organismal Systems;Environmental Information Processing;Organismal Systems;Metabolism;Organismal Systems;Metabolism;Metabolism;Metabolism;Metabolism	Global and overview maps;Digestive system;Signal transduction;Circulatory system;Lipid metabolism;Digestive system;Lipid metabolism;Lipid metabolism;Lipid metabolism;Lipid metabolism	ko01100//Metabolic pathways;ko04972//Pancreatic secretion;ko04014//Ras signaling pathway;ko04270//Vascular smooth muscle contraction;ko00564//Glycerophospholipid metabolism;ko04975//Fat digestion and absorption;ko00565//Ether lipid metabolism;ko00590//Arachidonic acid metabolism;ko00592//alpha-Linolenic acid metabolism;ko00591//Linoleic acid metabolism	K01047;K01047;K01047;K01047;K01047;K01047;K01047;K01047;K01047;K01047	-	GO:0004623//phospholipase A2 activity;GO:0046872//metal ion binding	GO:0006629//lipid metabolic process;GO:0006796//phosphate-containing compound metabolic process
LOC105229461	152	132	181	151	150	115	89	110	116	147	24.81	22.65	27.95	18.53	23	12.16	10.34	11.9	11.63	11.61	23.388	11.528	-1.02063	4.15126e-10	8.22469e-09	-	-	-	-	-	-	-	-	-
LOC105224776	106	55	100	200	150	351	344	441	487	729	27.55	15.03	24.59	39.15	36.59	59.09	63.67	76.01	77.72	91.67	28.582	73.632	1.36523	5.86178e-10	1.15357e-08	Dbi	PREDICTED: acyl-CoA-binding protein homolog [Bactrocera dorsalis]	-	-	-	-	-	-	-
LOC105229882	33	35	38	20	19	5	0	6	4	8	2.16	2.41	2.35	0.98	1.17	0.21	0	0.26	0.16	0.25	1.814	0.176	-3.36553	6.33175e-10	1.24397e-08	snk	PREDICTED: serine protease Hayan [Bactrocera dorsalis]	-	-	-	-	-	GO:0070011//peptidase activity, acting on L-amino acid peptides	-
LOC105232324	112	103	97	146	137	65	70	87	96	103	9.31	8.94	7.51	9.08	10.7	3.46	4.14	4.67	4.93	4.11	9.108	4.262	-1.0956	8.05689e-10	1.56715e-08	--	PREDICTED: DNA-binding protein RFXANK [Bactrocera dorsalis]	-	-	-	-	-	-	-
LOC105228879	42	32	67	86	48	171	128	218	207	284	5.75	4.6	8.67	8.84	6.17	15.16	12.47	19.78	17.4	18.8	6.806	16.722	1.29687	8.17286e-10	1.58445e-08	FAR1	PREDICTED: fatty acyl-CoA reductase 1 isoform X2 [Bactrocera cucurbitae]	Cellular Processes;Organismal Systems;Metabolism	Transport and catabolism;Aging;Lipid metabolism	ko04146//Peroxisome;ko04212//Longevity regulating pathway - worm;ko00073//Cutin, suberine and wax biosynthesis	K13356;K13356;K13356	-	GO:0016620//oxidoreductase activity, acting on the aldehyde or oxo group of donors, NAD or NADP as acceptor	GO:0044710//single-organism metabolic process
LOC105233179	82	73	104	60	89	421	194	473	365	350	7.37	6.9	8.84	4.05	7.51	24.51	12.41	28.18	20.15	15.22	6.934	20.094	1.53501	8.26105e-10	1.59891e-08	--	AGAP004674-PA [Anopheles gambiae str. PEST] [Anopheles gambiae]	-	-	-	-	-	-	-
LOC105223793	186	210	159	153	184	115	112	96	118	160	11.35	13.47	9.18	7.02	10.54	4.55	4.87	3.88	4.42	4.72	10.312	4.488	-1.20018	8.44739e-10	1.63228e-08	--	PREDICTED: uncharacterized protein LOC105223793 [Bactrocera dorsalis]	-	-	-	-	-	-	-
LOC105222836	368	373	616	520	466	225	262	359	218	438	15.09	16.08	23.9	16.03	17.95	5.98	7.65	9.76	5.49	8.69	17.81	7.514	-1.24503	1.04183e-09	1.99017e-08	-	-	-	-	-	-	-	-	-
LOC105234254	190	497	181	478	410	146	143	146	163	212	26.96	74.17	24.3	50.99	54.65	13.42	14.45	13.74	14.21	14.56	46.214	14.076	-1.71509	1.05121e-09	2.00482e-08	--	GL10758 [Drosophila persimilis]	-	-	-	-	-	-	-
LOC105224048	2	1	11	2	0	38	56	69	47	86	0.12	0.06	0.6	0.09	0	1.42	2.3	2.64	1.67	2.41	0.174	2.088	3.58496	1.05624e-09	2.00789e-08	-	-	-	-	-	-	-	-	-
LOC105227637	489	279	430	334	412	1111	1046	1257	975	1675	30.76	18.46	25.59	15.8	24.35	45.29	46.86	52.44	37.68	50.99	22.992	46.652	1.02081	1.07091e-09	2.03247e-08	-	-	-	-	-	-	-	-	-
LOC105234068	160	154	139	243	151	110	102	82	64	170	3.36	3.4	2.76	3.83	2.97	1.49	1.52	1.14	0.82	1.72	3.264	1.338	-1.28656	1.15897e-09	2.18546e-08	Prdm1	PREDICTED: zinc finger protein rotund isoform X1 [Bactrocera latifrons]	-	-	-	-	GO:0043231//intracellular membrane-bounded organelle	GO:0001071//nucleic acid binding transcription factor activity;GO:0043169//cation binding;GO:0097159//organic cyclic compound binding	GO:0010468//regulation of gene expression;GO:0034645//cellular macromolecule biosynthetic process;GO:0044763//single-organism cellular process
LOC105224742	147	192	251	220	241	174	123	129	159	203	7.6	10.45	12.29	8.56	11.71	5.83	4.53	4.43	5.05	5.08	10.122	4.984	-1.02212	1.26677e-09	2.37594e-08	RIOK1	PREDICTED: LOW QUALITY PROTEIN: serine/threonine-protein kinase RIO1 [Bactrocera dorsalis]	Genetic Information Processing	Translation	ko03008//Ribosome biogenesis in eukaryotes	K07178	-	GO:0004672//protein kinase activity;GO:0032550//purine ribonucleoside binding	GO:0006464//cellular protein modification process;GO:0006796//phosphate-containing compound metabolic process
LOC105229765	82	71	63	105	41	199	210	219	289	388	5	4.55	3.64	4.82	2.35	7.87	9.12	8.86	10.83	11.45	4.072	9.626	1.2412	1.35577e-09	2.53617e-08	Acy1b	PREDICTED: aminoacylase-1B [Bactrocera dorsalis]	Metabolism;Metabolism;Metabolism;Metabolism	Global and overview maps;Global and overview maps;Global and overview maps;Amino acid metabolism	ko01100//Metabolic pathways;ko01230//Biosynthesis of amino acids;ko01210//2-Oxocarboxylic acid metabolism;ko00220//Arginine biosynthesis	K14677;K14677;K14677;K14677	GO:0044424//intracellular part	GO:0043169//cation binding;GO:0070011//peptidase activity, acting on L-amino acid peptides	GO:0019538//protein metabolic process;GO:0019752//carboxylic acid metabolic process
LOC105222494	259	309	334	433	353	308	163	141	129	273	5.02	6.3	6.13	6.31	6.43	3.87	2.25	1.81	1.54	2.56	6.038	2.406	-1.32743	1.41039e-09	2.63415e-08	--	PREDICTED: uncharacterized protein LOC105222494 [Bactrocera dorsalis]	-	-	-	-	-	-	-
LOC105223646	977	1807	1593	3510	1963	5352	6586	5801	5346	10902	19.27	37.42	29.59	51.75	36.32	68.26	92.46	75.61	64.58	103.39	34.87	80.86	1.21344	1.56428e-09	2.90768e-08	AAEL008004	PREDICTED: elongation of very long chain fatty acids protein AAEL008004 isoform X1 [Bactrocera dorsalis]	-	-	-	-	-	-	-
LOC105228416	3719	3649	5841	4583	5861	2668	2933	3485	3474	5106	301.63	311.22	448.19	279.44	446.51	140.2	169.4	187.42	173.09	200.39	357.398	174.1	-1.03762	1.57479e-09	2.92257e-08	--	deoxyribonuclease I [Culex quinquefasciatus]	-	-	-	-	-	-	-
LOC105228328	95	102	48	109	61	25	20	31	34	59	5.55	6.27	2.65	4.8	3.39	0.95	0.85	1.25	1.22	1.67	4.532	1.188	-1.93161	1.60885e-09	2.97169e-08	Cyp28d1	PREDICTED: probable cytochrome P450 28d1 [Bactrocera dorsalis]	-	-	-	-	-	GO:0016491//oxidoreductase activity;GO:0046906//tetrapyrrole binding	GO:0044710//single-organism metabolic process
LOC105227167	10	10	20	37	32	2	0	0	1	3	1.24	1.31	2.36	3.46	3.74	0.16	0	0	0.08	0.18	2.422	0.084	-4.84967	1.70634e-09	3.13693e-08	PKS19	PREDICTED: LOW QUALITY PROTEIN: juvenile hormone acid O-methyltransferase-like [Bactrocera dorsalis]	Metabolism	Metabolism of terpenoids and polyketides	ko00981//Insect hormone biosynthesis	K10718	-	-	-
LOC105231118	68	47	83	83	46	11	26	32	27	33	4.82	3.51	5.61	4.42	3.06	0.52	1.32	1.52	1.19	1.14	4.284	1.138	-1.91246	1.86487e-09	3.39117e-08	--	PREDICTED: hyphal wall protein 2-like [Bactrocera dorsalis]	-	-	-	-	-	-	-
LOC105229690	18	16	15	14	14	58	88	57	85	76	2.41	2.25	1.9	1.41	1.76	4.92	8.27	4.97	6.94	4.83	1.946	5.986	1.62108	2.12843e-09	3.85252e-08	GstD1	PREDICTED: glutathione S-transferase 1-like isoform X2 [Bactrocera dorsalis]	Human Diseases;Human Diseases;Metabolism;Organismal Systems;Human Diseases;Human Diseases;Metabolism;Metabolism;Metabolism;Human Diseases;Human Diseases	Cancers;Cancers;Xenobiotics biodegradation and metabolism;Aging;Cardiovascular diseases;Cancers;Xenobiotics biodegradation and metabolism;Metabolism of other amino acids;Xenobiotics biodegradation and metabolism;Cancers;Drug resistance	ko05200//Pathways in cancer;ko05225//Hepatocellular carcinoma;ko00983//Drug metabolism - other enzymes;ko04212//Longevity regulating pathway - worm;ko05418//Fluid shear stress and atherosclerosis;ko05215//Prostate cancer;ko00980//Metabolism of xenobiotics by cytochrome P450;ko00480//Glutathione metabolism;ko00982//Drug metabolism - cytochrome P450;ko05204//Chemical carcinogenesis;ko01524//Platinu…	K00799;K00799;K00799;K00799;K00799;K00799;K00799;K00799;K00799;K00799;K00799	-	GO:0003824//catalytic activity	-
LOC105223564	57	74	63	73	37	18	24	26	23	45	8.48	11.66	8.91	8.17	5.21	1.74	2.56	2.58	2.12	3.26	8.486	2.452	-1.79113	2.32121e-09	4.17569e-08	--	PREDICTED: uncharacterized protein LOC105223564 [Bactrocera dorsalis]	-	-	-	-	-	-	-
LOC105234033	628	919	953	705	822	1701	2226	2161	2722	4045	135.21	208.07	194.11	114.11	166.24	237.28	341.28	308.5	360.02	421.4	163.548	333.696	1.02882	2.53235e-09	4.53465e-08	PapD	PREDICTED: male accessory gland serine protease inhibitor-like [Bactrocera dorsalis]	-	-	-	-	-	-	-
LOC105225150	72	97	140	174	99	77	57	54	80	81	4.65	7.45	9.16	8.72	6.34	3.83	2.77	2.85	3.7	3.1	7.264	3.25	-1.16032	2.66281e-09	4.75374e-08	spz5	PREDICTED: protein spaetzle 5 [Bactrocera dorsalis]	-	-	-	-	-	-	-
LOC105232378	41	61	39	64	38	173	154	110	149	247	4.19	6.51	3.72	4.88	3.64	11.38	11.18	7.38	9.34	12.15	4.588	10.286	1.16474	2.77436e-09	4.93038e-08	--	PREDICTED: uncharacterized protein LOC105232378 [Bactrocera dorsalis]	-	-	-	-	-	-	-
LOC105227214	31	91	198	52	60	21	8	18	3	9	4.89	15.09	29.53	6.16	8.89	2.15	0.9	1.88	0.29	0.69	12.912	1.182	-3.44941	3.06142e-09	5.42409e-08	--	PREDICTED: glycine-rich protein 23-like [Bactrocera dorsalis]	-	-	-	-	-	-	-
LOC105223854	122	110	45	118	122	31	31	57	34	52	3.69	3.5	1.29	2.68	3.47	0.61	0.67	1.14	0.63	0.76	2.926	0.762	-1.94107	3.12156e-09	5.52229e-08	SerT	PREDICTED: sodium-dependent serotonin transporter [Bactrocera dorsalis]	Organismal Systems	Nervous system	ko04726//Serotonergic synapse	K05037	GO:0031224//intrinsic component of membrane	GO:0015291//secondary active transmembrane transporter activity	GO:0044763//single-organism cellular process;GO:0044765//single-organism transport
LOC105226113	38	26	56	48	46	114	119	158	130	182	0.76	0.55	1.06	0.72	0.86	1.48	1.7	2.1	1.6	1.76	0.79	1.728	1.12918	3.59783e-09	6.33617e-08	--	Zinc finger protein 26, partial [Bactrocera dorsalis]	-	-	-	-	-	-	-
LOC105222207	144	158	239	160	121	102	101	70	69	125	2.34	2.7	3.68	1.96	1.85	1.07	1.17	0.75	0.69	0.98	2.506	0.932	-1.42698	3.92947e-09	6.8892e-08	Myc	PREDICTED: myc protein [Bactrocera dorsalis]	Human Diseases;Human Diseases;Human Diseases;Human Diseases;Environmental Information Processing;Human Diseases;Environmental Information Processing;Cellular Processes;Environmental Information Processing;Human Diseases;Environmental Information Processing;Organismal Systems;Cellular Processes;Human Diseases;Environmental Information Processing;Human Diseases;Human Diseases;Human Diseases;Cellula…	Cancers;Infectious diseases;Infectious diseases;Cancers;Signal transduction;Cancers;Signal transduction;Cell growth and death;Signal transduction;Infectious diseases;Signal transduction;Endocrine system;Cell growth and death;Cancers;Signal transduction;Infectious diseases;Cancers;Infectious diseases;Cellular community - eukaryotes;Cancers;Signal transduction;Cancers;Cancers;Cancers;Signal transdu…	ko05200//Pathways in cancer;ko05166//HTLV-I infection;ko05169//Epstein-Barr virus infection;ko05205//Proteoglycans in cancer;ko04151//PI3K-Akt signaling pathway;ko05225//Hepatocellular carcinoma;ko04010//MAPK signaling pathway;ko04110//Cell cycle;ko04310//Wnt signaling pathway;ko05163//Human cytomegalovirus infection;ko04390//Hippo signaling pathway;ko04919//Thyroid hormone signaling pathway;ko04…	K04377;K04377;K04377;K04377;K04377;K04377;K04377;K04377;K04377;K04377;K04377;K04377;K04377;K04377;K04377;K04377;K04377;K04377;K04377;K04377;K04377;K04377;K04377;K04377;K04377;K04377;K04377;K04377;K04377;K04377;K04377;K04377	-	-	-
LOC105232733	86	292	122	131	162	982	476	820	664	1205	12.71	45.39	17.06	14.56	22.49	94.05	50.1	80.37	60.29	86.19	22.442	74.2	1.72522	4.11423e-09	7.20235e-08	Lcp65Ag2	PREDICTED: larval cuticle protein 8-like [Bactrocera dorsalis]	-	-	-	-	-	GO:0005214//structural constituent of chitin-based cuticle	GO:0042335//cuticle development
LOC105230262	193	166	178	218	211	126	102	176	137	189	6.03	5.46	5.26	5.12	6.2	2.55	2.27	3.65	2.63	2.86	5.614	2.792	-1.00773	4.27256e-09	7.45728e-08	UGT8	PREDICTED: UDP-glucuronosyltransferase 1-8 [Bactrocera dorsalis]	Metabolism;Metabolism;Metabolism;Metabolism;Human Diseases;Metabolism;Organismal Systems;Metabolism;Metabolism;Metabolism;Metabolism	Global and overview maps;Xenobiotics biodegradation and metabolism;Xenobiotics biodegradation and metabolism;Xenobiotics biodegradation and metabolism;Cancers;Carbohydrate metabolism;Digestive system;Metabolism of cofactors and vitamins;Metabolism of cofactors and vitamins;Carbohydrate metabolism;Lipid metabolism	ko01100//Metabolic pathways;ko00983//Drug metabolism - other enzymes;ko00980//Metabolism of xenobiotics by cytochrome P450;ko00982//Drug metabolism - cytochrome P450;ko05204//Chemical carcinogenesis;ko00040//Pentose and glucuronate interconversions;ko04976//Bile secretion;ko00860//Porphyrin and chlorophyll metabolism;ko00830//Retinol metabolism;ko00053//Ascorbate and aldarate metabolism;ko00140//…	K00699;K00699;K00699;K00699;K00699;K00699;K00699;K00699;K00699;K00699;K00699	-	-	-
LOC105224379	114	125	249	178	163	5	7	2	2	48	6.09	7.02	12.58	7.14	8.17	0.17	0.27	0.07	0.07	1.24	8.2	0.364	-4.49361	4.29104e-09	7.4784e-08	-	-	-	-	-	-	-	-	-
LOC105227599	150	186	234	324	227	130	106	43	86	192	2.25	2.94	3.32	3.66	3.2	1.27	1.13	0.43	0.79	1.4	3.074	1.004	-1.61436	5.38413e-09	9.2732e-08	--	PREDICTED: rootletin [Bactrocera dorsalis]	-	-	-	-	-	-	-
LOC105222521	18	35	22	32	16	8	6	2	1	4	1.75	3.58	2.02	2.34	1.46	0.5	0.42	0.13	0.06	0.19	2.23	0.26	-3.10046	5.56887e-09	9.57731e-08	--	PREDICTED: probable serine/threonine-protein kinase kinX [Bactrocera dorsalis]	-	-	-	-	-	-	-
LOC105228877	922	515	996	1076	1410	396	439	535	323	947	76.41	44.88	78.09	67.04	109.76	21.26	25.91	29.4	16.44	37.97	75.236	26.196	-1.52208	5.68093e-09	9.74147e-08	Elovl1	PREDICTED: elongation of very long chain fatty acids protein F [Bactrocera dorsalis]	-	-	-	-	-	-	-
LOC105231171	779	876	3761	1178	1767	341	332	421	468	532	20.64	24.41	94.26	23.46	43.97	5.86	6.27	7.4	7.62	6.82	41.348	6.794	-2.60548	5.72815e-09	9.8081e-08	CD109	CD109 antigen, partial [Bactrocera dorsalis]	-	-	-	-	GO:0044421//extracellular region part	-	GO:0010466//negative regulation of peptidase activity
LOC105233815	0	0	0	3	0	29	25	25	45	52	0	0	0	0.1	0	0.87	0.82	0.77	1.28	1.16	0.02	0.98	5.61471	5.75059e-09	9.83216e-08	NAAT1	PREDICTED: sodium-dependent nutrient amino acid transporter 1 [Bactrocera dorsalis]	-	-	-	-	GO:0031224//intrinsic component of membrane	GO:0015291//secondary active transmembrane transporter activity	GO:0044763//single-organism cellular process;GO:0044765//single-organism transport
LOC105223304	197	137	138	165	150	136	92	80	80	113	6.59	4.82	4.36	4.15	4.71	2.95	2.19	1.77	1.64	1.83	4.926	2.076	-1.24661	5.80977e-09	9.90447e-08	Mcm6	PREDICTED: DNA replication licensing factor Mcm6 [Bactrocera dorsalis]	Cellular Processes;Genetic Information Processing	Cell growth and death;Replication and repair	ko04110//Cell cycle;ko03030//DNA replication	K02542;K02542	GO:0043231//intracellular membrane-bounded organelle;GO:0043234//protein complex	GO:0003676//nucleic acid binding;GO:0004386//helicase activity;GO:0032550//purine ribonucleoside binding	GO:0006259//DNA metabolic process;GO:0032392//DNA geometric change
LOC105225459	115	123	182	219	200	149	84	88	89	140	6.81	7.66	10.19	9.75	11.12	5.72	3.54	3.45	3.24	4.01	9.106	3.992	-1.18971	6.80034e-09	1.15096e-07	-	-	-	-	-	-	-	-	-
LOC105231115	23	15	22	38	33	10	5	3	7	12	0.84	0.58	0.76	1.04	1.13	0.24	0.13	0.07	0.16	0.21	0.87	0.162	-2.42502	7.12418e-09	1.20229e-07	--	PREDICTED: mucin-5AC isoform X2 [Bactrocera latifrons]	-	-	-	-	-	-	-
LOC105227668	164	163	157	233	158	156	75	120	90	161	8.17	8.54	7.4	8.73	7.4	5.04	2.66	3.97	2.76	3.88	8.048	3.662	-1.136	7.55242e-09	1.26909e-07	Cyp4aa1	PREDICTED: probable cytochrome P450 4aa1 [Bactrocera dorsalis]	-	-	-	-	-	GO:0016491//oxidoreductase activity;GO:0046906//tetrapyrrole binding;GO:0046914//transition metal ion binding	GO:0044710//single-organism metabolic process
LOC105232816	22	20	23	28	42	103	93	102	72	128	0.41	0.39	0.41	0.39	0.74	1.24	1.23	1.26	0.82	1.15	0.468	1.14	1.28445	9.0286e-09	1.50208e-07	--	PREDICTED: leucine-rich repeat-containing protein 49, partial [Drosophila suzukii]	-	-	-	-	-	-	-
LOC105227320	192	208	208	239	178	136	166	125	113	233	11.56	13.17	11.85	10.82	10.07	5.31	7.12	4.99	4.18	6.79	11.494	5.678	-1.01743	9.29467e-09	1.53395e-07	--	PREDICTED: protein msta [Bactrocera dorsalis]	-	-	-	-	-	-	-
LOC105229635	1030	968	2529	1030	1552	159	589	218	179	195	110.65	109.36	257.04	83.19	156.62	11.07	45.06	15.53	11.81	10.14	143.372	18.722	-2.93696	9.29866e-09	1.53395e-07	--	PREDICTED: uncharacterized protein LOC105229635, partial [Bactrocera dorsalis]	-	-	-	-	-	-	-
LOC105225270	57	99	87	124	77	66	34	27	32	64	2.15	3.93	3.11	3.52	2.73	1.62	0.91	0.68	0.74	1.17	3.088	1.024	-1.59246	1.09801e-08	1.79117e-07	Eip74EF	PREDICTED: ecdysone-induced protein 74EF [Bactrocera dorsalis]	Cellular Processes	Cell growth and death	ko04214//Apoptosis - fly	K09428	-	-	-
LOC109579951	1	0	1	3	4	15	47	32	32	199	0.05	0	0.05	0.11	0.18	0.48	1.64	1.04	0.96	4.71	0.078	1.766	4.50087	1.14467e-08	1.8647e-07	-	-	-	-	-	-	-	-	-
LOC105227925	69	71	85	89	70	51	43	58	47	75	2.53	2.74	2.97	2.5	2.44	1.22	1.17	1.4	1.06	1.38	2.636	1.246	-1.08105	1.26531e-08	2.047e-07	SLC7A5	PREDICTED: Y+L amino acid transporter 2 [Bactrocera dorsalis]	-	-	-	-	GO:0031224//intrinsic component of membrane	GO:0046943//carboxylic acid transmembrane transporter activity	-
LOC105222865	241	405	300	514	432	294	270	194	284	337	13.4	23.68	15.78	21.48	22.56	10.59	10.69	7.15	9.7	9.07	19.38	9.44	-1.03771	1.26936e-08	2.05073e-07	--	GM10499 [Drosophila sechellia]	-	-	-	-	-	-	-
LOC105224758	91	96	87	131	62	35	48	65	42	67	14.06	15.59	12.71	15.21	8.99	3.5	5.28	6.66	3.99	5.01	13.312	4.888	-1.44541	1.41873e-08	2.28329e-07	--	GH16385 [Drosophila grimshawi]	-	-	-	-	-	-	-
LOC105226841	28	35	54	60	41	28	15	8	15	14	3.98	5.24	7.27	6.42	5.48	2.58	1.52	0.75	1.31	0.96	5.678	1.424	-1.99543	1.69661e-08	2.71112e-07	--	PREDICTED: larval cuticle protein A3A isoform X1 [Bactrocera dorsalis]	-	-	-	-	-	-	-
LOC105228547	143	113	207	115	139	61	87	80	90	85	12.08	10.03	16.54	7.3	11.03	3.34	5.23	4.48	4.67	3.47	11.396	4.238	-1.42707	1.78803e-08	2.84659e-07	ea	PREDICTED: trypsin-1-like [Bactrocera dorsalis]	-	-	-	-	-	-	-
LOC105231981	23	35	30	52	41	17	11	20	14	17	0.75	1.2	0.93	1.28	1.26	0.36	0.26	0.43	0.28	0.27	1.084	0.32	-1.76022	1.82712e-08	2.89599e-07	--	PREDICTED: rhoGEF domain-containing protein gxcI [Drosophila navojoa]	-	-	-	-	-	-	-
LOC105221968	104	119	96	154	95	87	60	89	74	105	7.45	8.96	6.5	8.29	6.39	4.04	3.06	4.23	3.26	3.64	7.518	3.646	-1.04403	1.85629e-08	2.93824e-07	bocks	PREDICTED: otefin [Bactrocera dorsalis]	-	-	-	-	-	-	-
LOC105233503	21	23	20	19	12	88	51	69	99	96	1.84	2.12	1.66	1.25	0.99	4.99	3.18	4	5.32	4.06	1.572	4.31	1.45509	2.03197e-08	3.19049e-07	--	PREDICTED: probable palmitoyltransferase ZDHHC24 [Bactrocera dorsalis]	-	-	-	-	GO:0043231//intracellular membrane-bounded organelle	GO:0016746//transferase activity, transferring acyl groups	-
LOC105223232	19	50	23	25	21	245	96	144	135	145	1.19	3.28	1.36	1.17	1.23	9.91	4.27	5.96	5.18	4.38	1.646	5.94	1.8515	2.33865e-08	3.63312e-07	--	PREDICTED: uncharacterized protein LOC105223232 [Bactrocera dorsalis]	-	-	-	-	-	-	-
LOC109579176	7	4	6	5	6	41	29	22	43	70	0.54	0.32	0.44	0.29	0.43	2.05	1.59	1.12	2.03	2.61	0.404	1.88	2.21831	2.55142e-08	3.94277e-07	--	PREDICTED: loricrin isoform X2 [Bactrocera latifrons]	-	-	-	-	-	-	-
LOC105224553	4	14	21	7	9	0	0	0	0	0	0.42	1.55	2.09	0.55	0.89	0	0	0	0	0	1.1	0.001	-10.1033	3.00196e-08	4.57272e-07	--	PREDICTED: kunitz-type serine protease inhibitor 4 [Bactrocera dorsalis]	-	-	-	-	-	-	GO:0010466//negative regulation of peptidase activity
LOC105233889	67	61	76	114	95	42	44	25	35	85	2.72	2.61	2.92	3.48	3.63	1.11	1.27	0.67	0.87	1.67	3.072	1.118	-1.45826	3.28771e-08	4.98856e-07	PCP20	PREDICTED: glycine-rich cell wall structural protein [Bactrocera dorsalis]	-	-	-	-	-	GO:0005214//structural constituent of chitin-based cuticle	GO:0042335//cuticle development
LOC105224657	2376	2296	4401	2333	2457	1619	1560	1971	1875	2442	113.35	115.18	198.63	83.67	110.1	50.04	52.99	62.35	54.95	56.37	124.186	55.34	-1.16611	3.33718e-08	5.05707e-07	Spn42Dd	PREDICTED: serine protease inhibitor 42Dd [Bactrocera dorsalis]	Organismal Systems	Immune system	ko04624//Toll and Imd signaling pathway	K20698	-	-	-
LOC105222903	531	605	1220	596	429	293	236	396	407	385	49.37	59.17	107.65	41.63	37.43	17.65	15.62	24.35	23.35	17.19	59.05	19.632	-1.58873	3.71244e-08	5.57531e-07	C9orf64	PREDICTED: UPF0553 protein C9orf64 [Bactrocera dorsalis]	-	-	-	-	-	-	-
LOC105233875	122	97	79	105	103	80	39	64	53	78	14.58	12.19	8.93	9.43	11.56	6.19	3.32	5.07	3.89	4.51	11.338	4.596	-1.30272	3.95463e-08	5.90877e-07	PCP27	PREDICTED: endocuticle structural glycoprotein SgAbd-2 [Bactrocera dorsalis]	-	-	-	-	-	-	-
LOC105227391	13	15	19	35	14	57	61	77	97	98	2.98	3.62	4.12	6.03	3.01	8.46	9.96	11.7	13.66	10.87	3.952	10.93	1.46764	4.15686e-08	6.19514e-07	-	-	-	-	-	-	-	-	-
LOC105232109	0	0	2	3	0	19	26	20	33	29	0	0	0.12	0.14	0	0.76	1.15	0.82	1.26	0.87	0.052	0.972	4.22437	4.44121e-08	6.60215e-07	KLHL3	PREDICTED: kelch-like protein 5 [Bactrocera dorsalis]	-	-	-	-	-	-	-
LOC115066711	62	45	88	80	58	142	194	179	200	311	14.4	10.99	19.33	13.96	12.65	21.36	32.08	27.56	28.53	34.94	14.266	28.894	1.01819	4.48433e-08	6.65781e-07	--	Protein spaetzle [Bactrocera dorsalis]	Organismal Systems	Immune system	ko04624//Toll and Imd signaling pathway	K20694	-	-	-
LOC105225432	61	28	38	41	48	13	11	24	18	21	4.61	2.18	2.58	2.21	3.23	0.6	0.65	1.14	0.79	0.73	2.962	0.782	-1.92133	4.66113e-08	6.90283e-07	AGAP007347	PREDICTED: lysozyme [Bactrocera dorsalis]	-	-	-	-	-	GO:0004553//hydrolase activity, hydrolyzing O-glycosyl compounds	GO:0006959//humoral immune response;GO:0048102//autophagic cell death
LOC105223217	53	35	56	92	45	192	201	182	125	206	2.44	1.73	2.46	3.18	1.9	5.75	6.43	5.56	3.51	4.62	2.342	5.174	1.14354	4.68797e-08	6.93382e-07	GLB1	PREDICTED: beta-galactosidase [Bactrocera dorsalis]	Metabolism;Cellular Processes;Metabolism;Metabolism;Metabolism;Metabolism;Metabolism	Global and overview maps;Transport and catabolism;Carbohydrate metabolism;Lipid metabolism;Glycan biosynthesis and metabolism;Glycan biosynthesis and metabolism;Glycan biosynthesis and metabolism	ko01100//Metabolic pathways;ko04142//Lysosome;ko00052//Galactose metabolism;ko00600//Sphingolipid metabolism;ko00511//Other glycan degradation;ko00531//Glycosaminoglycan degradation;ko00604//Glycosphingolipid biosynthesis - ganglio series	K12309;K12309;K12309;K12309;K12309;K12309;K12309	-	GO:0015925//galactosidase activity	GO:0044238//primary metabolic process
LOC105224821	8	25	38	31	32	77	113	116	123	184	0.41	1.36	1.86	1.21	1.56	2.59	4.17	3.99	3.92	4.62	1.28	3.858	1.59171	4.79493e-08	7.0653e-07	--	PREDICTED: slit homolog 2 protein [Bactrocera dorsalis]	-	-	-	-	-	-	-
LOC105222948	22	3	4	7	5	115	935	135	78	266	3.34	0.48	0.57	0.8	0.71	11.3	100.94	13.57	7.26	19.51	1.18	30.516	4.69271	4.93584e-08	7.2638e-07	--	Pheromone-binding protein-related protein 5, partial [Bactrocera dorsalis]	-	-	-	-	-	-	-
LOC105225463	17	16	19	26	21	5	3	4	9	9	0.69	0.68	0.73	0.8	0.8	0.13	0.09	0.11	0.23	0.18	0.74	0.148	-2.32193	4.98531e-08	7.31824e-07	SAPCD2	PREDICTED: suppressor APC domain-containing protein 2 [Bactrocera dorsalis]	-	-	-	-	-	-	-
MSTRG.9018	125	121	217	166	187	104	85	131	88	138	13.37	13.62	21.97	13.35	18.79	7.21	6.48	9.29	5.78	7.15	16.22	7.182	-1.17532	5.15667e-08	7.55088e-07	--	-	-	-	-	-	-	-	-
LOC105222733	51	55	101	131	79	54	34	32	21	58	1.86	2.11	3.49	3.6	2.71	1.28	0.88	0.77	0.47	1.02	2.754	0.884	-1.63941	5.81309e-08	8.46979e-07	ATOH8	PREDICTED: probable maltase-glucoamylase-like protein [Ceratitis capitata]	-	-	-	-	-	-	-
LOC105234109	7	6	11	10	3	33	32	38	56	57	1.9	1.71	2.82	2.04	0.76	5.8	6.18	6.83	9.33	7.48	1.846	7.124	1.94828	6.25822e-08	9.10703e-07	--	PREDICTED: DNA-dependent protein kinase catalytic subunit-like, partial [Rhagoletis zephyria]	-	-	-	-	-	-	-
LOC105230182	33	72	75	42	37	153	179	223	202	330	1.76	4.04	3.78	1.68	1.85	5.29	6.8	7.89	6.62	8.52	2.622	7.024	1.42163	7.30074e-08	1.04939e-06	--	Acetylcholine receptor subunit epsilon, partial [Bactrocera dorsalis]	-	-	-	-	GO:0031224//intrinsic component of membrane	-	GO:0006811//ion transport
LOC105229953	68	48	63	61	62	30	24	44	34	50	2.14	1.59	1.87	1.44	1.83	0.61	0.54	0.92	0.66	0.76	1.774	0.698	-1.34571	7.34235e-08	1.05408e-06	-	-	-	-	-	-	-	-	-
LOC105232451	45	119	101	37	42	254	313	393	364	751	1.98	5.51	4.21	1.23	1.74	7.25	9.82	11.48	9.85	16.01	2.934	10.882	1.891	8.28154e-08	1.18024e-06	--	PREDICTED: protein draper-like [Bactrocera dorsalis]	-	-	-	-	-	-	-
MSTRG.8331	7	2	5	3	6	29	20	37	39	67	1.82	0.55	1.23	0.63	1.46	4.87	3.74	6.36	6.27	8.41	1.138	5.93	2.38153	8.31146e-08	1.18307e-06	--	RH54067p [Drosophila melanogaster]	-	-	-	-	-	GO:0016740//transferase activity	GO:0006796//phosphate-containing compound metabolic process
LOC105224923	19	9	10	22	21	3	0	2	1	5	0.69	0.34	0.35	0.59	0.72	0.07	0	0.05	0.02	0.09	0.538	0.046	-3.5479	8.47335e-08	1.20465e-06	phm	PREDICTED: cytochrome P450 306a1 [Bactrocera dorsalis]	Metabolism	Metabolism of terpenoids and polyketides	ko00981//Insect hormone biosynthesis	K10720	-	GO:0005488//binding	-
LOC105229967	87	64	67	72	64	318	157	198	262	223	5.05	3.9	3.68	3.14	3.49	11.96	6.48	7.62	9.34	6.26	3.852	8.332	1.11306	8.50559e-08	1.20777e-06	Ces2a	PREDICTED: venom carboxylesterase-6-like [Bactrocera dorsalis]	Metabolism	Metabolism of terpenoids and polyketides	ko00981//Insect hormone biosynthesis	K01063	-	-	-
LOC105227526	276	240	399	310	310	297	214	159	182	269	8.27	7.56	11.31	6.98	8.73	5.77	4.57	3.16	3.35	3.9	8.57	4.15	-1.04618	1.17433e-07	1.61663e-06	wdn	PREDICTED: serendipity locus protein H-1 [Bactrocera dorsalis]	-	-	-	-	-	-	-
LOC105225893	164	320	230	387	293	184	182	158	128	290	5.12	10.5	6.79	9.08	8.59	3.72	4.04	3.27	2.45	4.38	8.016	3.572	-1.16615	1.18113e-07	1.62409e-06	atg101	PREDICTED: autophagy-related protein 101 [Bactrocera dorsalis]	Cellular Processes;Organismal Systems;Cellular Processes	Transport and catabolism;Aging;Transport and catabolism	ko04140//Autophagy - animal;ko04211//Longevity regulating pathway - mammal;ko04136//Autophagy - other eukaryotes	K19730;K19730;K19730	GO:0043234//protein complex	GO:0019900//kinase binding	GO:0010508//positive regulation of autophagy
LOC105222636	77	78	13	219	63	1137	519	744	703	1287	1.77	1.88	0.28	3.78	1.36	16.9	8.48	11.32	9.91	14.29	1.814	12.18	2.74727	1.21078e-07	1.6629e-06	CPA4	Carboxypeptidase B, partial [Bactrocera dorsalis]	-	-	-	-	-	-	-
LOC105229757	96	20	33	126	114	6	2	3	8	37	6.23	1.37	2.03	6.15	6.95	0.25	0.09	0.13	0.32	1.16	4.546	0.39	-3.54305	1.34059e-07	1.83474e-06	--	PREDICTED: serine/arginine repetitive matrix protein 5 [Bactrocera dorsalis]	-	-	-	-	-	-	-
LOC105230523	208	164	330	191	156	108	114	133	103	185	23.56	19.53	35.36	16.26	16.6	7.93	9.19	9.99	7.17	10.14	22.262	8.884	-1.3253	1.35049e-07	1.84615e-06	Arc2	Arc2 [Drosophila melanogaster]	-	-	-	-	-	-	-
LOC105224017	91	129	81	87	103	308	243	357	293	300	8.24	12.81	7.26	6.37	8.72	19.24	16.6	22.28	17.31	14.36	8.68	17.958	1.04886	1.47933e-07	2.01522e-06	Arsb	PREDICTED: arylsulfatase B [Bactrocera dorsalis]	Metabolism;Cellular Processes;Metabolism	Global and overview maps;Transport and catabolism;Glycan biosynthesis and metabolism	ko01100//Metabolic pathways;ko04142//Lysosome;ko00531//Glycosaminoglycan degradation	K01135;K01135;K01135	-	GO:0016788//hydrolase activity, acting on ester bonds	-
LOC105229089	338	258	264	256	293	244	199	195	163	178	14.43	11.58	10.66	8.21	11.75	6.75	6.05	5.52	4.27	3.68	11.326	5.254	-1.10815	1.61037e-07	2.18359e-06	Mcm7	PREDICTED: DNA replication licensing factor Mcm7 [Bactrocera dorsalis]	Cellular Processes;Genetic Information Processing	Cell growth and death;Replication and repair	ko04110//Cell cycle;ko03030//DNA replication	K02210;K02210	GO:0043231//intracellular membrane-bounded organelle;GO:0043234//protein complex	GO:0003676//nucleic acid binding;GO:0004386//helicase activity;GO:0032550//purine ribonucleoside binding	GO:0006259//DNA metabolic process;GO:0032392//DNA geometric change
LOC105223924	29	57	21	44	61	225	115	145	168	205	1.52	3.15	1.04	1.68	3.01	7.64	4.31	5.05	5.37	5.16	2.08	5.506	1.40442	1.70793e-07	2.30521e-06	GNRHR2	PREDICTED: gonadotropin-releasing hormone receptor [Bactrocera dorsalis]	-	-	-	-	GO:0016021//integral component of membrane	GO:0008188//neuropeptide receptor activity	GO:0006081//cellular aldehyde metabolic process;GO:0007186//G-protein coupled receptor signaling pathway;GO:0030534//adult behavior;GO:0045471//response to ethanol
LOC105221902	21	24	17	20	23	55	79	65	82	89	1.98	2.38	1.52	1.42	2.04	3.36	5.3	4.06	4.75	4.06	1.868	4.306	1.20485	1.93815e-07	2.59801e-06	-	-	-	-	-	-	-	-	-
LOC105227858	197	157	189	242	126	72	115	138	121	149	16.51	13.83	14.98	15.24	9.92	3.91	6.86	7.67	6.23	6.04	14.096	6.142	-1.19851	1.99684e-07	2.67058e-06	--	PREDICTED: myb-like protein M [Bactrocera dorsalis]	-	-	-	-	-	-	-
LOC105226321	280	141	183	291	173	449	484	772	820	914	27.97	14.81	17.29	21.85	16.23	29.06	34.42	51.13	50.31	44.17	19.63	41.818	1.09106	2.31115e-07	3.05608e-06	--	PREDICTED: kunitz/BPTI-like toxin [Bactrocera dorsalis]	-	-	-	-	-	-	-
LOC105227849	136	64	132	95	101	58	62	59	44	86	5.58	2.76	5.12	2.93	3.89	1.54	1.81	1.6	1.11	1.71	4.056	1.554	-1.38407	2.5191e-07	3.31954e-06	Plpp2	PREDICTED: putative phosphatidate phosphatase [Bactrocera dorsalis]	Metabolism;Environmental Information Processing;Human Diseases;Metabolism;Organismal Systems;Metabolism;Metabolism;Organismal Systems;Metabolism	Global and overview maps;Signal transduction;Cancers;Lipid metabolism;Immune system;Lipid metabolism;Lipid metabolism;Digestive system;Lipid metabolism	ko01100//Metabolic pathways;ko04072//Phospholipase D signaling pathway;ko05231//Choline metabolism in cancer;ko00564//Glycerophospholipid metabolism;ko04666//Fc gamma R-mediated phagocytosis;ko00561//Glycerolipid metabolism;ko00600//Sphingolipid metabolism;ko04975//Fat digestion and absorption;ko00565//Ether lipid metabolism	K01080;K01080;K01080;K01080;K01080;K01080;K01080;K01080;K01080	-	GO:0016791//phosphatase activity	GO:0006796//phosphate-containing compound metabolic process;GO:0007165//signal transduction
LOC105226071	49	65	76	62	59	129	172	243	189	234	2.41	3.38	3.53	2.29	2.72	4.24	6.11	8.19	5.82	5.56	2.866	5.984	1.06207	2.54374e-07	3.34479e-06	SLC15A2	PREDICTED: peptide transporter family 1 [Bactrocera dorsalis]	-	-	-	-	GO:0016020//membrane	-	GO:0006810//transport
LOC105223108	68	92	210	96	165	390	465	511	457	524	4.06	5.78	11.87	4.31	9.26	15.1	19.78	20.24	16.77	15.15	7.056	17.408	1.30283	2.72474e-07	3.57077e-06	HMT-1	PREDICTED: homocysteine S-methyltransferase-like [Bactrocera oleae]	Metabolism;Metabolism	Global and overview maps;Amino acid metabolism	ko01100//Metabolic pathways;ko00270//Cysteine and methionine metabolism	K00547;K00547	-	GO:0008172//S-methyltransferase activity	GO:0008152//metabolic process
LOC105231227	39	36	30	33	24	133	79	81	108	134	2.56	2.48	1.86	1.63	1.48	5.51	3.69	3.52	4.28	4.22	2.002	4.244	1.08398	2.93339e-07	3.82286e-06	UGT2B20	PREDICTED: UDP-glucuronosyltransferase 2B20-like isoform X1 [Bactrocera dorsalis]	Metabolism;Metabolism;Metabolism;Metabolism;Human Diseases;Metabolism;Organismal Systems;Metabolism;Metabolism;Metabolism;Metabolism	Global and overview maps;Xenobiotics biodegradation and metabolism;Xenobiotics biodegradation and metabolism;Xenobiotics biodegradation and metabolism;Cancers;Carbohydrate metabolism;Digestive system;Metabolism of cofactors and vitamins;Metabolism of cofactors and vitamins;Carbohydrate metabolism;Lipid metabolism	ko01100//Metabolic pathways;ko00983//Drug metabolism - other enzymes;ko00980//Metabolism of xenobiotics by cytochrome P450;ko00982//Drug metabolism - cytochrome P450;ko05204//Chemical carcinogenesis;ko00040//Pentose and glucuronate interconversions;ko04976//Bile secretion;ko00860//Porphyrin and chlorophyll metabolism;ko00830//Retinol metabolism;ko00053//Ascorbate and aldarate metabolism;ko00140//…	K00699;K00699;K00699;K00699;K00699;K00699;K00699;K00699;K00699;K00699;K00699	-	GO:0016757//transferase activity, transferring glycosyl groups	-
LOC105232111	48	59	68	79	52	31	28	45	46	51	1.9	2.46	2.55	2.35	1.94	0.8	0.79	1.18	1.12	0.98	2.24	0.974	-1.20151	3.2758e-07	4.24551e-06	--	PREDICTED: transcription factor SPT20 homolog [Bactrocera dorsalis]	-	-	-	-	-	-	-
LOC105223355	30	38	71	68	100	19	2	19	6	30	2.11	2.81	4.73	3.6	6.61	0.87	0.1	0.89	0.26	1.02	3.972	0.628	-2.66103	3.34538e-07	4.32136e-06	BBOX1	Gamma-butyrobetaine dioxygenase, partial [Bactrocera dorsalis]	Metabolism	Amino acid metabolism	ko00310//Lysine degradation	K00471	-	-	GO:0044710//single-organism metabolic process
LOC105223641	13	31	82	15	11	3	4	5	0	3	0.59	1.49	3.54	0.51	0.47	0.09	0.13	0.15	0	0.07	1.32	0.088	-3.90689	3.83761e-07	4.93005e-06	--	PREDICTED: probable WRKY transcription factor protein 1 [Musca domestica]	Environmental Information Processing	Signal transduction	ko04391//Hippo signaling pathway -fly	K16689	-	-	-
LOC105227091	79	79	55	109	93	40	64	29	55	47	14.2	14.93	9.35	14.73	15.7	4.66	8.19	3.46	6.07	4.09	13.782	5.294	-1.38036	4.06501e-07	5.20508e-06	Ms	PREDICTED: dromyosuppressin [Bactrocera dorsalis]	-	-	-	-	GO:0044421//extracellular region part	GO:0001664//G-protein coupled receptor binding;GO:0005179//hormone activity	GO:0002027//regulation of heart rate;GO:0006940//regulation of smooth muscle contraction;GO:0007186//G-protein coupled receptor signaling pathway;GO:0007626//locomotory behavior;GO:0044058//regulation of digestive system process
LOC105231087	26	34	28	33	31	21	14	8	10	18	5.07	7.24	5.39	5.08	6.13	2.77	1.98	1.14	1.21	1.67	5.782	1.754	-1.72092	4.17448e-07	5.3336e-06	--	PREDICTED: metallothionein-1-like isoform X1 [Bactrocera dorsalis]	-	-	-	-	-	-	-
LOC105222215	1179	814	1707	1168	1697	769	850	999	633	1287	43	31.22	58.9	32.03	58.14	18.17	22.08	24.16	14.18	22.71	44.658	20.26	-1.14028	4.49949e-07	5.69919e-06	v1g246094	PREDICTED: branched-chain-amino-acid aminotransferase, cytosolic [Bactrocera dorsalis]	Metabolism;Metabolism;Metabolism;Metabolism;Metabolism;Metabolism;Metabolism	Global and overview maps;Global and overview maps;Amino acid metabolism;Amino acid metabolism;Global and overview maps;Metabolism of cofactors and vitamins;Amino acid metabolism	ko01100//Metabolic pathways;ko01230//Biosynthesis of amino acids;ko00270//Cysteine and methionine metabolism;ko00280//Valine, leucine and isoleucine degradation;ko01210//2-Oxocarboxylic acid metabolism;ko00770//Pantothenate and CoA biosynthesis;ko00290//Valine, leucine and isoleucine biosynthesis	K00826;K00826;K00826;K00826;K00826;K00826;K00826	-	GO:0004084//branched-chain-amino-acid transaminase activity	GO:0008652//cellular amino acid biosynthetic process
LOC105228015	38	22	34	27	35	104	81	97	96	103	2.08	1.26	1.76	1.11	1.8	3.68	3.15	3.52	3.22	2.72	1.602	3.258	1.02411	5.20824e-07	6.55445e-06	-	-	-	-	-	-	-	-	-
LOC105228119	52	30	45	53	49	23	10	13	2	28	1.73	1.05	1.41	1.32	1.54	0.51	0.24	0.29	0.04	0.45	1.41	0.306	-2.20409	5.53912e-07	6.94106e-06	--	GM20206 [Drosophila sechellia]	-	-	-	-	-	-	-
MSTRG.5762	248	284	497	368	386	1429	1572	762	2225	865	51.42	61.92	97.49	57.36	75.18	191.97	232.1	104.76	283.4	86.78	68.674	179.802	1.38857	5.61895e-07	7.01113e-06	--	-	-	-	-	-	-	-	-
LOC105224838	10	9	3	10	5	0	0	0	0	0	1.2	1.13	0.34	0.9	0.56	0	0	0	0	0	0.826	0.001	-9.69	5.67508e-07	7.07364e-06	--	PREDICTED: chorion class B protein L11-like [Bactrocera dorsalis]	-	-	-	-	-	-	-
LOC105227656	94	93	89	77	130	247	352	334	568	276	8.55	8.9	7.66	5.27	11.11	14.56	22.81	20.16	31.76	12.15	8.298	20.288	1.28979	5.97306e-07	7.40571e-06	-	-	-	-	-	-	-	-	-
LOC105226974	183	203	408	205	183	150	124	128	137	206	27.24	31.77	57.45	22.94	25.59	14.47	13.14	12.63	12.53	14.84	32.998	13.522	-1.28707	6.16048e-07	7.61394e-06	--	PREDICTED: serine protease persephone-like isoform X1 [Rhagoletis zephyria]	-	-	-	-	-	-	-
LOC105233601	17	24	30	28	19	14	6	4	10	9	0.48	0.71	0.8	0.59	0.5	0.25	0.12	0.07	0.17	0.12	0.616	0.146	-2.07696	6.31182e-07	7.76824e-06	--	PREDICTED: proteoglycan 4 [Bactrocera dorsalis]	-	-	-	-	-	-	-
LOC105221996	139	133	206	152	127	67	97	82	68	173	9.47	9.53	13.28	7.79	8.13	2.96	4.71	3.7	2.85	5.7	9.64	3.984	-1.27482	6.42532e-07	7.88312e-06	E(spl)m3-HLH	PREDICTED: enhancer of split m3 protein [Bactrocera dorsalis]	-	-	-	-	-	-	-
LOC105221860	148	251	336	132	465	36	35	135	123	89	22.96	40.93	49.31	15.39	67.7	3.57	3.87	13.89	11.72	6.68	39.258	7.946	-2.30469	6.63539e-07	8.12386e-06	--	PREDICTED: general odorant-binding protein 56a-like [Bactrocera dorsalis]	-	-	-	-	-	-	-
LOC105224762	106	115	143	178	198	640	476	282	374	442	3.02	3.45	3.86	3.82	5.3	11.83	9.67	5.33	6.55	6.1	3.89	7.896	1.02135	7.50927e-07	9.13172e-06	--	PREDICTED: probable serine/threonine-protein kinase kinX [Stomoxys calcitrans]	-	-	-	-	-	-	-
LOC105230122	8	9	9	10	21	55	46	51	35	100	0.15	0.17	0.16	0.14	0.36	0.65	0.6	0.62	0.39	0.89	0.196	0.63	1.6845	7.62695e-07	9.25093e-06	Tmc3	PREDICTED: mucin-5AC-like, partial [Rhagoletis zephyria]	-	-	-	-	-	-	-
LOC105231269	43	21	49	23	47	120	136	109	133	167	3.45	1.77	3.72	1.39	3.55	6.2	7.69	5.8	6.56	6.49	2.776	6.548	1.23805	7.75829e-07	9.39081e-06	Reg-2	PREDICTED: rhythmically expressed gene 2 protein [Bactrocera dorsalis]	-	-	-	-	-	GO:0016787//hydrolase activity	GO:0008152//metabolic process
LOC105223420	201	184	186	310	218	240	123	120	127	140	11.62	11.19	10.18	13.48	11.84	8.99	5.06	4.6	4.51	3.92	11.662	5.416	-1.10652	8.05992e-07	9.74586e-06	-	-	-	-	-	-	-	-	-
LOC105231792	94	145	121	149	102	55	85	79	71	135	2.52	4.1	3.07	3.01	2.57	0.96	1.63	1.41	1.17	1.75	3.054	1.384	-1.14186	8.56208e-07	1.03105e-05	-	-	-	-	-	-	-	-	-
LOC105227822	219	244	233	329	244	130	174	175	128	341	1.29	1.51	1.29	1.45	1.35	0.49	0.73	0.68	0.46	0.97	1.378	0.666	-1.04898	1.16898e-06	1.38215e-05	ft	PREDICTED: cadherin-related tumor suppressor [Bactrocera dorsalis]	Environmental Information Processing;Environmental Information Processing	Signal transduction;Signal transduction	ko04391//Hippo signaling pathway -fly;ko04392//Hippo signaling pathway - multiple species	K16669;K16669	GO:0016020//membrane	-	GO:0007155//cell adhesion
LOC105225798	25	34	34	46	29	132	97	82	86	102	0.73	1.04	0.94	1	0.79	2.48	2	1.58	1.53	1.43	0.9	1.804	1.0032	1.1994e-06	1.41385e-05	--	Osi24, partial [Drosophila busckii]	-	-	-	-	-	-	-
LOC105224963	9	4	9	10	3	24	33	36	39	62	0.94	0.44	0.89	0.78	0.29	1.62	2.45	2.49	2.5	3.13	0.668	2.438	1.86778	1.22903e-06	1.44298e-05	svop	Synaptic vesicle glycoprotein 2A, partial [Bactrocera dorsalis]	-	-	-	-	-	GO:0005215//transporter activity	GO:0044763//single-organism cellular process
LOC105229398	156	146	121	200	165	131	134	112	89	99	5.69	5.6	4.17	5.48	5.65	3.09	3.48	2.71	1.99	1.75	5.318	2.604	-1.03015	1.40742e-06	1.63766e-05	sug	PREDICTED: zinc finger protein GLIS2 homolog [Bactrocera dorsalis]	-	-	-	-	-	GO:0043169//cation binding	-
LOC105226471	430	316	360	237	280	170	149	267	212	273	55.15	42.62	43.68	22.85	33.73	14.13	13.61	22.7	16.7	16.94	39.606	16.816	-1.23588	1.65068e-06	1.89071e-05	--	PREDICTED: probable serine/threonine-protein kinase fhkB [Bactrocera dorsalis]	-	-	-	-	-	-	-
LOC105225825	6074	2502	5974	5963	9140	2291	2260	2974	1227	4263	382.12	165.53	355.57	282.02	540.12	93.39	101.25	124.06	47.42	129.77	345.072	99.178	-1.79881	1.6648e-06	1.90501e-05	wat	PREDICTED: fatty acyl-CoA reductase wat [Bactrocera dorsalis]	Cellular Processes;Organismal Systems;Metabolism	Transport and catabolism;Aging;Lipid metabolism	ko04146//Peroxisome;ko04212//Longevity regulating pathway - worm;ko00073//Cutin, suberine and wax biosynthesis	K13356;K13356;K13356	-	-	-
LOC105229001	119	203	79	276	157	127	65	85	74	101	6.93	12.43	4.35	12.08	8.59	4.79	2.7	3.28	2.65	2.85	8.876	3.254	-1.4477	1.7335e-06	1.98169e-05	-	-	-	-	-	-	-	-	-
LOC105232592	42	23	40	28	25	80	87	104	101	157	1.73	1	1.52	0.82	0.95	1.92	2.36	2.68	2.28	2.95	1.204	2.438	1.01786	1.85725e-06	2.11287e-05	PAQR4	PREDICTED: uncharacterized serine-rich protein C215.13 isoform X3 [Bactrocera dorsalis]	-	-	-	-	-	-	-
LOC115066478	13	17	75	9	29	1	1	1	9	1	2.43	3.34	13.24	1.26	5.08	0.12	0.13	0.12	1.03	0.09	5.07	0.298	-4.0886	1.86862e-06	2.12374e-05	UBI1	Ubiquitin-60S ribosomal protein L40 [Anoplophora glabripennis]	Genetic Information Processing	Translation	ko03010//Ribosome	K02927	GO:0030529//intracellular ribonucleoprotein complex	-	GO:0010467//gene expression
LOC105223687	526	509	827	504	480	356	416	351	531	479	50.79	51.41	75.95	36.82	43.7	22.04	28.87	22.82	32.02	22.67	51.734	25.684	-1.01024	1.87217e-06	2.12572e-05	--	GL12945 [Drosophila persimilis]	-	-	-	-	-	-	-
LOC105233809	378	687	713	584	331	314	143	422	257	377	57.55	109.99	102.7	66.84	47.34	30.97	15.5	42.6	24.04	27.77	76.884	28.176	-1.44822	2.10313e-06	2.37189e-05	--	PREDICTED: glycine-rich RNA-binding protein 2-like [Bactrocera dorsalis]	-	-	-	-	-	-	-
MSTRG.1385	8	7	12	10	8	44	37	32	60	35	0.22	0.21	0.32	0.21	0.21	0.8	0.74	0.59	1.03	0.47	0.234	0.726	1.63346	2.20256e-06	2.47687e-05	--	reverse transcriptase and RNase H-like protein, partial [Drosophila simulans]	-	-	-	-	-	-	-
MSTRG.8309	8	4	20	12	9	0	1	0	1	0	1.53	0.8	3.61	1.72	1.61	0	0.14	0	0.12	0	1.854	0.052	-5.15599	2.27193e-06	2.54999e-05	--	-	-	-	-	-	-	-	-
LOC105233649	86	98	83	150	99	108	60	63	66	80	2.07	2.49	1.89	2.73	2.24	1.69	1.04	1.01	0.98	0.93	2.284	1.13	-1.01524	2.52571e-06	2.81597e-05	--	PREDICTED: mucin-5AC isoform X1 [Bactrocera latifrons]	-	-	-	-	-	-	-
LOC105223566	88	45	62	73	50	197	226	139	206	193	3.78	2.03	2.52	2.36	2.02	5.49	6.92	3.96	5.44	4.01	2.542	5.164	1.02252	2.63988e-06	2.92934e-05	slc5a8	PREDICTED: sodium-coupled monocarboxylate transporter 1 [Bactrocera dorsalis]	-	-	-	-	GO:0031224//intrinsic component of membrane	-	GO:0044763//single-organism cellular process;GO:0051234//establishment of localization
LOC105225675	337	359	414	406	269	1344	706	621	1094	2635	7.13	7.99	8.29	6.46	5.35	18.43	10.64	8.72	14.23	26.99	7.044	15.802	1.16564	2.70893e-06	3.00312e-05	-	-	-	-	-	-	-	-	-
LOC105231653	18	14	23	20	31	73	85	40	89	140	0.63	0.52	0.77	0.53	1.03	1.67	2.13	0.93	1.93	2.39	0.696	1.81	1.37883	2.7434e-06	3.03847e-05	--	PREDICTED: mucin-5AC [Bactrocera dorsalis]	-	-	-	-	-	-	-
LOC105223671	29	20	36	46	29	76	97	83	107	249	2.85	2.07	3.35	3.4	2.68	4.84	6.78	5.41	6.46	11.83	2.87	7.064	1.29943	2.75838e-06	3.05217e-05	--	PREDICTED: glycine-rich cell wall structural protein 1.0-like [Bactrocera dorsalis]	-	-	-	-	-	-	-
LOC105232242	10	4	14	11	22	37	52	52	57	100	1.2	0.51	1.59	0.99	2.48	2.88	4.45	4.14	4.21	5.81	1.354	4.298	1.66644	3.01536e-06	3.31537e-05	-	-	-	-	-	-	-	-	-
LOC115066645	2	0	3	2	0	13	13	18	37	29	0.31	0	0.44	0.23	0	1.31	1.44	1.86	3.54	2.19	0.196	2.068	3.39931	3.02222e-06	3.31906e-05	--	CG4597 [Drosophila busckii]	-	-	-	-	-	-	-
LOC105231108	16	31	42	39	33	92	103	99	71	178	2.16	4.4	5.37	3.96	4.19	8.05	9.91	8.87	5.89	11.63	4.016	8.87	1.14317	3.09444e-06	3.38886e-05	AAEL008004	PREDICTED: elongation of very long chain fatty acids protein AAEL008004 [Bactrocera dorsalis]	-	-	-	-	GO:0031224//intrinsic component of membrane	GO:0003824//catalytic activity	GO:0006631//fatty acid metabolic process
LOC115066576	18	3	11	13	12	74	81	55	27	86	0.4	0.07	0.23	0.22	0.25	1.06	1.28	0.81	0.37	0.92	0.234	0.888	1.92405	3.19238e-06	3.48961e-05	--	PREDICTED: microtubule-associated protein futsch [Rhagoletis zephyria]	-	-	-	-	-	-	-
LOC105233100	7	2	7	2	12	57	38	35	39	32	0.21	0.06	0.2	0.05	0.35	1.13	0.83	0.71	0.73	0.47	0.174	0.774	2.15325	3.39267e-06	3.6982e-05	Grin2b	PREDICTED: glutamate receptor ionotropic, NMDA 2B isoform X1 [Bactrocera latifrons]	Human Diseases;Human Diseases;Environmental Information Processing;Environmental Information Processing;Environmental Information Processing;Environmental Information Processing;Organismal Systems;Human Diseases;Organismal Systems;Organismal Systems;Organismal Systems;Human Diseases;Human Diseases;Human Diseases;Human Diseases;Human Diseases	Neurodegenerative diseases;Neurodegenerative diseases;Signal transduction;Signal transduction;Signal transduction;Signaling molecules and interaction;Nervous system;Substance dependence;Environmental adaptation;Nervous system;Nervous system;Substance dependence;Neurodegenerative diseases;Substance dependence;Substance dependence;Immune diseases	ko05016//Huntington disease;ko05010//Alzheimer disease;ko04014//Ras signaling pathway;ko04024//cAMP signaling pathway;ko04015//Rap1 signaling pathway;ko04080//Neuroactive ligand-receptor interaction;ko04728//Dopaminergic synapse;ko05034//Alcoholism;ko04713//Circadian entrainment;ko04720//Long-term potentiation;ko04724//Glutamatergic synapse;ko05031//Amphetamine addiction;ko05014//Amyotrophic late…	K05210;K05210;K05210;K05210;K05210;K05210;K05210;K05210;K05210;K05210;K05210;K05210;K05210;K05210;K05210;K05210	GO:0031224//intrinsic component of membrane;GO:0097060//synaptic membrane	GO:0005231//excitatory extracellular ligand-gated ion channel activity	GO:0006811//ion transport;GO:0007215//glutamate receptor signaling pathway
LOC109579239	48	76	146	45	238	21	19	59	24	36	7.53	12.56	21.68	5.31	35.14	2.18	2.12	6.14	2.31	2.73	16.444	3.096	-2.40908	3.52764e-06	3.82754e-05	--	General odorant-binding protein 56a, partial [Bactrocera dorsalis]	-	-	-	-	-	-	-
LOC105226450	893	489	997	991	1540	514	542	620	353	1048	89.7	51.65	94.74	74.83	145.3	33.45	38.77	41.29	21.78	50.94	91.244	37.246	-1.29264	3.54428e-06	3.84204e-05	eloF	PREDICTED: elongation of very long chain fatty acids protein F [Bactrocera dorsalis]	Metabolism;Metabolism	Global and overview maps;Lipid metabolism	ko01100//Metabolic pathways;ko00062//Fatty acid elongation	K10249;K10249	-	-	-
MSTRG.1988	58	26	57	40	40	11	19	15	31	27	4.21	1.98	3.91	2.18	2.73	0.52	0.98	0.72	1.38	0.95	3.002	0.91	-1.72199	4.15868e-06	4.43026e-05	--	-	-	-	-	-	-	-	-
LOC105231258	58	35	26	61	35	81	133	164	165	228	2.66	1.69	1.13	2.1	1.51	2.41	4.34	4.99	4.65	5.06	1.818	4.29	1.23863	4.22505e-06	4.49688e-05	-	-	-	-	-	-	-	-	-
LOC105231821	19	25	15	22	18	5	5	8	4	15	0.49	0.68	0.37	0.43	0.44	0.08	0.09	0.14	0.06	0.19	0.482	0.112	-2.10553	4.29897e-06	4.55901e-05	SINAT2	E3 ubiquitin-protein ligase SIAH1, partial [Bactrocera dorsalis]	-	-	-	-	-	GO:0003824//catalytic activity;GO:0046914//transition metal ion binding	GO:0019941//modification-dependent protein catabolic process;GO:0044707//single-multicellular organism process
LOC105225817	275	103	368	194	126	75	46	132	81	144	39.98	15.75	50.62	21.2	17.21	7.07	4.76	12.73	7.23	10.13	28.952	8.384	-1.78795	4.37341e-06	4.63376e-05	GstD1	PREDICTED: glutathione S-transferase D1-like [Bactrocera dorsalis]	Human Diseases;Human Diseases;Metabolism;Organismal Systems;Human Diseases;Human Diseases;Metabolism;Metabolism;Metabolism;Human Diseases;Human Diseases	Cancers;Cancers;Xenobiotics biodegradation and metabolism;Aging;Cardiovascular diseases;Cancers;Xenobiotics biodegradation and metabolism;Metabolism of other amino acids;Xenobiotics biodegradation and metabolism;Cancers;Drug resistance	ko05200//Pathways in cancer;ko05225//Hepatocellular carcinoma;ko00983//Drug metabolism - other enzymes;ko04212//Longevity regulating pathway - worm;ko05418//Fluid shear stress and atherosclerosis;ko05215//Prostate cancer;ko00980//Metabolism of xenobiotics by cytochrome P450;ko00480//Glutathione metabolism;ko00982//Drug metabolism - cytochrome P450;ko05204//Chemical carcinogenesis;ko01524//Platinu…	K00799;K00799;K00799;K00799;K00799;K00799;K00799;K00799;K00799;K00799;K00799	-	-	-
LOC105231214	440	466	1316	536	513	323	305	360	366	580	12.27	13.67	34.8	11.22	13.42	5.83	6.05	6.65	6.27	7.8	17.076	6.52	-1.38903	4.54737e-06	4.80073e-05	SOCS5	PREDICTED: mucin-5AC [Bactrocera dorsalis]	Organismal Systems;Environmental Information Processing	Endocrine system;Signal transduction	ko04917//Prolactin signaling pathway;ko04630//Jak-STAT signaling pathway	K04698;K04698	-	-	-
LOC105228508	49	68	104	56	27	194	165	244	257	290	2.58	3.76	5.17	2.21	1.33	6.61	6.18	8.51	8.3	7.38	3.01	7.396	1.29698	4.67099e-06	4.91796e-05	modSP	PREDICTED: modular serine protease [Bactrocera dorsalis]	Organismal Systems	Immune system	ko04624//Toll and Imd signaling pathway	K20674	-	GO:0004175//endopeptidase activity	GO:0019538//protein metabolic process
LOC105232183	415	365	792	483	549	491	328	338	378	400	22.23	20.37	40.6	19.68	27.46	16.95	12.42	12.01	12.48	10.43	26.068	12.858	-1.01961	5.34427e-06	5.57181e-05	--	PREDICTED: uncharacterized protein LOC105232183 isoform X1 [Bactrocera dorsalis]	-	-	-	-	-	-	-
LOC105229684	2766	4636	4177	4580	4897	13127	17552	8153	20063	8691	642.21	1131.94	917.53	799.44	1068.01	1974.78	2902.04	1255.19	2861.7	976.44	911.826	1994.03	1.12886	5.37169e-06	5.59543e-05	--	PREDICTED: uncharacterized protein LOC105229684 [Bactrocera dorsalis]	-	-	-	-	-	-	-
LOC105228232	47	49	42	70	67	44	30	44	31	38	1.29	1.3	1.05	1.34	1.71	0.72	0.57	0.76	0.51	0.5	1.338	0.612	-1.12847	5.51474e-06	5.72917e-05	--	PREDICTED: uncharacterized protein LOC105228232 isoform X1 [Bactrocera dorsalis]	-	-	-	-	-	-	-
LOC105233036	5	11	6	8	5	37	45	23	24	56	0.47	1.08	0.53	0.56	0.44	2.24	2.99	1.42	1.37	2.53	0.616	2.11	1.77624	6.05788e-06	6.24366e-05	--	PREDICTED: venom allergen 3 [Bactrocera dorsalis]	-	-	-	-	-	-	-
LOC105230250	105	101	115	187	115	88	31	52	85	137	2.55	2.6	2.65	3.42	2.63	1.39	0.54	0.84	1.27	1.61	2.77	1.13	-1.29356	6.81738e-06	6.95138e-05	--	PREDICTED: restin homolog isoform X4 [Bactrocera latifrons]	-	-	-	-	-	-	-
LOC105234011	19	15	16	29	11	11	2	2	1	5	0.44	0.37	0.35	0.51	0.24	0.17	0.03	0.03	0.01	0.06	0.382	0.06	-2.67054	8.03811e-06	8.11351e-05	PPAF2	Serine proteinase stubble [Bactrocera dorsalis]	-	-	-	-	-	GO:0004175//endopeptidase activity	GO:0019538//protein metabolic process
LOC105231807	1365	1908	1921	1851	1891	1205	1373	830	1848	899	66.52	97.77	88.56	67.81	86.56	38.05	47.64	26.82	55.32	21.2	81.444	37.806	-1.10719	8.16622e-06	8.21454e-05	--	hypothetical protein [Bactrocera dorsalis]	-	-	-	-	-	-	-
LOC105226374	12	16	37	26	27	128	120	52	159	74	0.72	1.02	2.11	1.18	1.53	5.01	5.16	2.08	5.9	2.16	1.312	4.062	1.63042	8.2137e-06	8.25523e-05	-	-	-	-	-	-	-	-	-
LOC105233928	44	90	39	58	108	250	196	225	285	217	3.9	8.38	3.27	3.86	8.99	14.35	12.36	13.22	15.51	9.3	5.68	12.948	1.18877	8.57451e-06	8.58842e-05	pld1	PREDICTED: LOW QUALITY PROTEIN: L-galactose dehydrogenase-like [Bactrocera dorsalis]	-	-	-	-	-	-	GO:0044710//single-organism metabolic process
LOC105233145	55	42	55	96	37	16	18	41	11	8	5.71	4.59	5.4	7.5	3.61	1.08	1.33	2.82	0.7	0.4	5.362	1.266	-2.08249	9.08532e-06	9.04599e-05	--	GH11808 [Drosophila grimshawi]	-	-	-	-	-	-	-
LOC109579676	2	1	5	1	7	16	21	45	27	33	0.34	0.18	0.81	0.13	1.12	1.77	2.56	5.1	2.84	2.73	0.516	3	2.53952	9.1349e-06	9.07994e-05	--	PREDICTED: alpha-tocopherol transfer protein-like [Bactrocera dorsalis]	-	-	-	-	GO:0044464//cell part	-	GO:0051234//establishment of localization
LOC105223827	6	0	8	4	4	36	22	29	42	24	0.67	0	0.85	0.34	0.42	2.62	1.76	2.16	2.9	1.3	0.456	2.148	2.23589	9.43854e-06	9.34217e-05	SDR-1	PREDICTED: farnesol dehydrogenase-like [Bactrocera dorsalis]	Metabolism;Metabolism	Metabolism of terpenoids and polyketides;Metabolism of terpenoids and polyketides	ko00981//Insect hormone biosynthesis;ko00900//Terpenoid backbone biosynthesis	K15890;K15890	-	GO:0003824//catalytic activity	GO:0044710//single-organism metabolic process
LOC105223047	18	33	19	32	24	95	66	70	55	141	0.56	1.08	0.56	0.75	0.7	1.92	1.47	1.45	1.06	2.13	0.73	1.606	1.1375	9.66134e-06	9.54658e-05	mew	PREDICTED: integrin alpha-PS1 [Bactrocera dorsalis]	-	-	-	-	GO:0016021//integral component of membrane	-	-
LOC105233435	21	16	36	28	11	12	8	3	7	7	1.86	1.41	2.86	1.77	0.92	0.65	0.51	0.18	0.38	0.3	1.764	0.404	-2.12642	9.68569e-06	9.56258e-05	--	GM18967 [Drosophila sechellia]	-	-	-	-	-	-	-
LOC105226762	19	10	26	47	34	7	14	1	3	8	0.88	0.48	1.13	1.63	1.47	0.21	0.46	0.03	0.08	0.18	1.118	0.192	-2.54174	1.06881e-05	0.000104905	SERPINB3	PREDICTED: LOW QUALITY PROTEIN: serpin B13 [Bactrocera dorsalis]	-	-	-	-	-	-	-
LOC105233281	1717	1029	2650	1066	1261	5563	5839	7547	6451	5431	378.85	238.76	553.18	176.83	261.35	795.3	917.45	1104.16	874.42	579.85	321.794	854.236	1.4085	1.17443e-05	0.000114125	--	PREDICTED: histidine-rich glycoprotein-like [Bactrocera latifrons]	-	-	-	-	-	-	-
LOC105228395	8	12	17	17	15	28	45	57	84	73	0.75	1.17	1.49	1.2	1.3	1.68	2.99	3.49	4.8	3.29	1.182	3.25	1.45921	1.22339e-05	0.000118197	CRYL1	PREDICTED: lambda-crystallin [Bactrocera dorsalis]	Metabolism;Metabolism	Global and overview maps;Carbohydrate metabolism	ko01100//Metabolic pathways;ko00040//Pentose and glucuronate interconversions	K13247;K13247	-	GO:0016614//oxidoreductase activity, acting on CH-OH group of donors;GO:0043168//anion binding;GO:0048037//cofactor binding	GO:0032787//monocarboxylic acid metabolic process
LOC105223129	559	1157	1045	1083	864	3664	4889	1870	5206	2575	17.21	37.47	30.44	25.07	24.99	73.1	107.2	38.18	98.48	38.37	27.036	71.066	1.39428	1.26173e-05	0.000121103	mycC	PREDICTED: mycosubtilin synthase subunit C [Bactrocera oleae]	-	-	-	-	-	-	-
LOC105224580	4	3	10	6	7	34	26	24	33	28	0.59	0.46	1.39	0.66	0.97	3.23	2.72	2.34	2.98	1.99	0.814	2.652	1.70398	1.34827e-05	0.000128778	--	PREDICTED: A-agglutinin anchorage subunit-like, partial [Bactrocera oleae]	-	-	-	-	-	-	-
LOC105221974	41	47	55	42	35	28	15	24	32	41	2.3	2.68	2.89	1.75	1.86	0.99	0.6	0.89	1.11	1.12	2.296	0.942	-1.28532	1.4572e-05	0.00013869	slc46a1	PREDICTED: proton-coupled folate transporter isoform X1 [Bactrocera dorsalis]	Organismal Systems;Human Diseases;Organismal Systems	Digestive system;Drug resistance;Digestive system	ko04978//Mineral absorption;ko01523//Antifolate resistance;ko04977//Vitamin digestion and absorption	K14613;K14613;K14613	-	-	-
LOC105227771	50	27	27	38	30	84	77	118	158	132	4.74	2.69	2.42	2.71	2.67	5.16	5.19	7.41	9.19	6.05	3.046	6.6	1.11555	1.4583e-05	0.00013869	CD63	PREDICTED: protein late bloomer [Bactrocera dorsalis]	-	-	-	-	GO:0031224//intrinsic component of membrane	-	-
MSTRG.15241	2	1	0	1	2	17	24	6	28	18	0.61	0.33	0	0.23	0.57	3.36	5.1	1.21	5.23	2.64	0.348	3.508	3.33349	1.45915e-05	0.00013869	--	-	-	-	-	-	-	-	-
LOC105233910	471	248	255	1598	253	97	135	204	138	225	17.8	9.86	9.12	45.4	8.98	2.38	3.63	5.11	3.2	4.11	18.232	3.686	-2.30634	1.47028e-05	0.000139522	Cyp4c3	PREDICTED: cytochrome P450 4c3 [Bactrocera dorsalis]	-	-	-	-	-	GO:0016491//oxidoreductase activity;GO:0046906//tetrapyrrole binding;GO:0046914//transition metal ion binding	GO:0030908//protein splicing;GO:0044710//single-organism metabolic process
LOC105223156	23	13	26	20	13	9	6	3	10	9	0.63	0.37	0.67	0.41	0.33	0.16	0.12	0.05	0.17	0.12	0.482	0.124	-1.95869	1.77498e-05	0.000167353	SYT1	PREDICTED: synaptotagmin-5 [Bactrocera dorsalis]	-	-	-	-	-	-	-
LOC105221928	198	95	154	174	115	99	129	80	98	114	19.89	10.03	14.63	13.14	10.85	6.44	9.23	5.33	6.05	5.54	13.708	6.518	-1.07252	1.78265e-05	0.000167942	--	GH14025 [Drosophila grimshawi]	-	-	-	-	-	-	-
LOC105225763	10	22	9	49	12	5	7	4	2	6	1.31	3.04	1.12	4.83	1.48	0.43	0.65	0.35	0.16	0.38	2.356	0.394	-2.58007	1.79081e-05	0.000168575	--	GH19696 [Drosophila grimshawi]	-	-	-	-	-	-	-
LOC105231993	79	53	112	63	77	58	42	44	31	73	1.42	1	1.9	0.85	1.3	0.68	0.54	0.52	0.34	0.63	1.294	0.542	-1.25547	1.8043e-05	0.000169572	dome	PREDICTED: cytokine receptor [Bactrocera dorsalis]	-	-	-	-	-	-	-
LOC105232387	101	101	170	102	89	80	67	64	65	131	11.22	11.8	17.87	8.52	9.29	5.76	5.3	4.72	4.44	7.04	11.74	5.452	-1.10657	1.81554e-05	0.00017022	--	PREDICTED: uncharacterized protein LOC105232387 [Bactrocera dorsalis]	-	-	-	-	-	-	-
LOC105223677	175	128	346	334	209	873	1074	400	1111	607	15.35	11.81	28.71	22.02	17.22	49.61	67.08	23.26	59.87	25.76	19.022	45.116	1.24597	1.82659e-05	0.000170871	Pnliprp2	PREDICTED: vitellogenin-1-like [Bactrocera dorsalis]	-	-	-	-	-	-	-
LOC105232368	10	12	15	15	18	36	40	51	49	55	2.35	2.96	3.33	2.65	3.97	5.48	6.69	7.94	7.07	6.25	3.052	6.686	1.13139	1.82686e-05	0.000170871	--	PREDICTED: uncharacterized protein LOC105232368 [Bactrocera dorsalis]	-	-	-	-	-	-	-
MSTRG.9825	12	17	17	24	17	0	5	1	10	5	0.93	1.39	1.25	1.4	1.24	0	0.28	0.05	0.48	0.19	1.242	0.2	-2.63459	1.94453e-05	0.000180868	--	-	-	-	-	-	-	-	-
LOC105231697	12	1	9	8	11	31	34	29	48	58	1.54	0.13	1.09	0.77	1.33	2.58	3.11	2.47	3.78	3.6	0.972	3.108	1.67696	1.94792e-05	0.000181039	Fibcd1	PREDICTED: techylectin-5B-like [Bactrocera dorsalis]	-	-	-	-	-	-	-
LOC105230068	21	25	43	38	41	83	59	112	113	156	1.98	2.47	3.83	2.69	3.62	5.06	3.95	6.99	6.53	7.1	2.918	5.926	1.02208	1.97869e-05	0.000183608	kraken	PREDICTED: probable serine hydrolase [Bactrocera dorsalis]	-	-	-	-	-	-	-
LOC105231256	26	28	29	54	16	15	12	16	14	22	1.57	1.77	1.65	2.45	0.91	0.59	0.51	0.64	0.52	0.64	1.67	0.58	-1.52572	2.00508e-05	0.000185909	-	-	-	-	-	-	-	-	-
LOC105230546	253	67	1625	60	65	6	17	14	71	7	54.14	15.08	329	9.65	13.07	0.83	2.59	1.99	9.33	0.72	84.188	3.092	-4.767	2.21701e-05	0.000204428	--	Diptericin, partial [Bactrocera dorsalis]	-	-	-	-	-	-	-
LOC105230849	342	189	401	400	517	69	10	57	161	197	29.95	17.4	33.22	26.33	42.53	3.91	0.62	3.31	8.66	8.35	29.886	4.97	-2.58815	2.34774e-05	0.000215299	--	CG4115 [Drosophila melanogaster]	-	-	-	-	-	-	-
LOC105230781	6	22	9	13	9	18	46	109	80	152	0.14	0.55	0.2	0.23	0.2	0.28	0.78	1.73	1.18	1.76	0.264	1.146	2.118	2.37438e-05	0.000217232	--	PREDICTED: mucin-5AC [Bactrocera dorsalis]	-	-	-	-	-	-	-
LOC109579606	51	55	54	84	79	52	51	26	41	67	2.34	2.65	2.49	3.04	3.42	1.59	1.66	0.78	1.17	1.54	2.788	1.348	-1.04841	2.44731e-05	0.000223555	--	PREDICTED: box A-binding factor [Bactrocera latifrons]	-	-	-	-	-	-	-
LOC105221901	6	7	13	11	5	1	2	0	0	1	1.03	1.26	2.11	1.42	0.8	0.11	0.24	0	0	0.08	1.324	0.086	-3.94442	2.51047e-05	0.000228968	--	Larval cuticle protein 5, partial [Bactrocera dorsalis]	-	-	-	-	-	-	-
LOC105231786	98	57	125	113	174	64	54	63	28	114	12.35	7.55	14.9	10.7	20.59	5.22	4.84	5.26	2.17	6.95	13.218	4.888	-1.43519	2.72705e-05	0.000246612	-	-	-	-	-	-	-	-	-
LOC105222226	17	19	12	38	52	144	111	63	74	240	0.31	0.37	0.21	0.52	0.9	1.71	1.45	0.77	0.83	2.13	0.462	1.378	1.57661	3.04418e-05	0.000271936	Cbp53E	PREDICTED: calbindin-32 isoform X1 [Bactrocera dorsalis]	-	-	-	-	-	-	-
LOC105233943	42	23	27	67	21	91	129	110	106	126	0.78	0.48	0.52	1.05	0.38	1.1	1.72	1.36	1.22	1.14	0.642	1.308	1.02672	3.15753e-05	0.000281205	KIRREL3	Hemicentin-1, partial [Bactrocera dorsalis]	-	-	-	-	GO:0031224//intrinsic component of membrane	-	-
LOC105233886	60	54	39	185	55	26	11	50	16	42	11.44	10.83	7.03	26.52	9.85	3.21	1.49	6.32	1.87	3.87	13.134	3.352	-1.97021	3.21946e-05	0.000286068	Cpr47Eg	PREDICTED: cuticular protein 47Eg-like [Bactrocera dorsalis]	-	-	-	-	-	-	-
LOC105231063	45	25	20	78	24	0	20	3	5	8	7.87	4.59	3.3	10.23	3.93	0	2.55	0.35	0.55	0.68	5.984	0.826	-2.8569	3.22712e-05	0.000286532	--	PREDICTED: uncharacterized protein LOC105231063 isoform X1 [Bactrocera dorsalis]	-	-	-	-	-	-	-
LOC105223823	1	2	4	0	0	17	16	10	15	28	0.41	0.87	1.56	0	0	4.55	4.71	2.74	3.81	5.6	0.568	4.282	2.91432	3.51676e-05	0.000309438	--	PREDICTED: dehydrogenase/reductase SDR family member 11-like [Bactrocera dorsalis]	Metabolism;Metabolism	Metabolism of terpenoids and polyketides;Metabolism of terpenoids and polyketides	ko00981//Insect hormone biosynthesis;ko00900//Terpenoid backbone biosynthesis	K15890;K15890	-	-	-
LOC105222989	77	114	75	114	96	53	66	53	37	122	1.06	1.66	0.98	1.18	1.25	0.47	0.65	0.49	0.31	0.82	1.226	0.548	-1.16171	3.72256e-05	0.000326078	--	Tachykinin-like peptides receptor 99D, partial [Bactrocera dorsalis]	-	-	-	-	-	-	-
LOC105233442	93	48	102	108	136	39	44	62	24	104	11.5	6.24	11.93	10.04	15.79	3.12	3.87	5.08	1.82	6.22	11.1	4.022	-1.46457	4.14803e-05	0.000361727	AAEL008004	Elongation of very long chain fatty acids protein 1 [Bactrocera dorsalis]	-	-	-	-	GO:0016020//membrane	-	GO:0006631//fatty acid metabolic process
LOC105228339	79	69	55	52	65	36	57	30	42	44	3.65	3.35	2.4	1.81	2.82	1.08	1.88	0.92	1.19	0.98	2.806	1.21	-1.21351	4.32132e-05	0.00037453	B-H1	PREDICTED: homeobox protein B-H1 [Bactrocera dorsalis]	-	-	-	-	-	-	-
LOC109579779	6	8	39	20	34	2	8	6	4	3	0.59	0.83	3.63	1.48	3.14	0.13	0.56	0.39	0.24	0.14	1.934	0.292	-2.72755	4.32358e-05	0.00037453	--	PREDICTED: hemolysin E-like [Drosophila rhopaloa]	-	-	-	-	-	-	-
LOC105225665	20	19	25	19	27	70	62	64	101	56	0.99	0.99	1.17	0.71	1.26	2.25	2.19	2.1	3.07	1.34	1.024	2.19	1.09672	4.66815e-05	0.000402372	rost	PREDICTED: protein rolling stone [Bactrocera dorsalis]	-	-	-	-	-	-	-
LOC105229885	10	2	9	5	7	26	43	26	27	38	0.8	0.17	0.68	0.3	0.53	1.35	2.46	1.39	1.33	1.48	0.496	1.602	1.69146	4.71148e-05	0.000405436	--	PREDICTED: gelsolin-like isoform X1 [Bactrocera latifrons]	-	-	-	-	-	-	-
LOC105233296	6	7	13	16	7	2	0	4	1	2	0.68	0.83	1.39	1.36	0.74	0.15	0	0.3	0.07	0.11	1	0.126	-2.9885	4.91251e-05	0.000419962	-	-	-	-	-	-	-	-	-
LOC105226495	51	47	47	54	35	25	41	20	35	28	1.83	1.77	1.59	1.45	1.18	0.58	1.05	0.47	0.77	0.49	1.564	0.672	-1.21871	5.05549e-05	0.00042968	ara	PREDICTED: homeobox protein araucan [Bactrocera dorsalis]	-	-	-	-	-	GO:0000981//RNA polymerase II transcription factor activity, sequence-specific DNA binding	GO:0006357//regulation of transcription from RNA polymerase II promoter;GO:0035114//imaginal disc-derived appendage morphogenesis;GO:0042692//muscle cell differentiation;GO:0048592//eye morphogenesis;GO:0048812//neuron projection morphogenesis;GO:0060573//cell fate specification involved in pattern specification
LOC105229463	35	39	36	40	91	191	128	136	136	159	0.91	1.08	0.89	0.78	2.22	3.22	2.39	2.34	2.17	2	1.176	2.424	1.0435	5.08697e-05	0.000431418	SAK	PREDICTED: serine/threonine-protein kinase PLK4 [Bactrocera dorsalis]	Environmental Information Processing	Signal transduction	ko04068//FoxO signaling pathway	K08863	-	GO:0016301//kinase activity;GO:0032550//purine ribonucleoside binding	GO:0006464//cellular protein modification process;GO:0006796//phosphate-containing compound metabolic process
LOC105229949	6	5	4	1	7	43	36	16	23	27	0.63	0.55	0.4	0.08	0.69	2.93	2.7	1.12	1.49	1.38	0.47	1.924	2.03338	5.09553e-05	0.000431605	--	GM21921 [Drosophila sechellia]	-	-	-	-	-	-	-
LOC105233778	49	57	43	105	59	36	33	13	27	70	1.21	1.61	1.12	1.88	1.27	0.69	0.67	0.25	0.48	0.95	1.418	0.608	-1.22171	5.66991e-05	0.000474145	Egr3	PREDICTED: dendritic arbor reduction protein 1 [Bactrocera dorsalis]	-	-	-	-	-	GO:0043169//cation binding	-
LOC105230253	14	8	3	7	14	54	35	33	41	40	0.27	0.17	0.06	0.1	0.26	0.69	0.49	0.43	0.49	0.38	0.172	0.496	1.52793	5.67162e-05	0.000474145	NWD2	PREDICTED: NACHT and WD repeat domain-containing protein 2 [Bactrocera dorsalis]	-	-	-	-	-	-	-
LOC105227146	43	40	57	79	41	22	22	20	55	30	4.54	4.44	5.69	6.27	4.06	1.5	1.65	1.4	3.57	1.53	5	1.93	-1.37333	5.88293e-05	0.000488675	Edg78E	PREDICTED: pupal cuticle protein Edg-78E-like [Bactrocera dorsalis]	-	-	-	-	-	-	-
LOC105226386	35	19	34	50	31	2	0	14	12	19	0.68	0.39	0.63	0.73	0.57	0.03	0	0.18	0.14	0.18	0.6	0.106	-2.5009	6.039e-05	0.000499869	--	PREDICTED: flocculation protein FLO11 [Bactrocera latifrons]	-	-	-	-	-	-	-
LOC105232812	20	57	12	67	35	19	11	18	7	14	0.38	1.14	0.22	0.96	0.63	0.23	0.15	0.23	0.08	0.13	0.666	0.164	-2.02183	6.07111e-05	0.000501818	WISP1	PREDICTED: bromodomain-containing protein DDB_G0280777 [Bactrocera latifrons]	-	-	-	-	-	-	GO:0030154//cell differentiation
LOC105221989	13	26	17	10	9	1	1	5	0	8	0.71	1.49	0.88	0.41	0.46	0.04	0.04	0.18	0	0.21	0.79	0.094	-3.07112	6.36784e-05	0.000523762	E(spl)mdelta-HLH	PREDICTED: enhancer of split mdelta protein [Bactrocera dorsalis]	-	-	-	-	-	-	-
LOC105228564	747	2039	3443	2573	2197	830	697	1236	1500	753	56.46	162.07	246.2	146.2	155.98	40.65	37.51	61.94	69.65	27.54	153.382	47.458	-1.69241	6.45936e-05	0.000529433	TNC	PREDICTED: angiopoietin-related protein 7 [Bactrocera dorsalis]	-	-	-	-	-	-	-
LOC105230416	5	8	9	8	9	27	17	33	33	70	1.36	2.29	2.32	1.64	2.3	4.77	3.3	5.96	5.53	9.23	1.982	5.758	1.53861	7.20561e-05	0.000587314	-	-	-	-	-	-	-	-	-
LOC105229391	8	20	11	9	11	33	40	38	53	57	0.86	2.26	1.12	0.73	1.11	2.3	3.06	2.71	3.5	2.96	1.216	2.906	1.25689	7.43477e-05	0.000603477	--	Natterin-1 [Bactrocera dorsalis]	-	-	-	-	-	-	-
LOC105226944	79	97	52	104	55	72	42	39	53	67	6.49	8.38	4.04	6.42	4.24	3.83	2.46	2.12	2.67	2.66	5.914	2.748	-1.10575	7.62324e-05	0.000616076	--	GH12456 [Drosophila grimshawi]	-	-	-	-	-	-	-
LOC105232400	55	65	120	82	90	37	41	74	54	74	6.85	8.51	14.13	7.67	10.53	2.98	3.63	6.11	4.13	4.46	9.538	4.262	-1.16216	7.90001e-05	0.000633784	--	PREDICTED: uncharacterized protein LOC105232400 [Bactrocera dorsalis]	-	-	-	-	-	-	-
LOC105227352	41	18	32	24	31	15	14	6	20	20	1.9	0.89	1.16	0.73	1.08	0.45	0.49	0.16	0.53	0.36	1.152	0.398	-1.5333	8.00208e-05	0.000640658	--	PREDICTED: uncharacterized protein LOC105227352 isoform X1 [Bactrocera dorsalis]	-	-	-	-	-	-	-
LOC105232855	820	939	795	906	1038	586	1023	442	642	471	25.2	31.54	22.47	21.44	31.5	11.58	22.76	8.73	11.92	6.99	26.43	12.396	-1.0923	8.90638e-05	0.000706308	pax6a	PREDICTED: paired box protein Pax-6 isoform X1 [Bactrocera dorsalis]	-	-	-	-	-	-	-
LOC105225673	91	51	90	91	105	71	45	60	81	57	6.62	3.9	6.19	4.97	7.17	3.34	2.33	2.89	3.62	2.01	5.77	2.838	-1.0237	9.00281e-05	0.000712029	C1GalTA	PREDICTED: glycoprotein-N-acetylgalactosamine 3-beta-galactosyltransferase 1-like [Bactrocera dorsalis]	Metabolism;Metabolism	Global and overview maps;Glycan biosynthesis and metabolism	ko01100//Metabolic pathways;ko00512//Mucin type O-glycan biosynthesis	K00731;K00731	-	-	-
LOC105229884	48	20	31	38	21	3	11	11	22	19	2.85	1.25	1.74	1.7	1.17	0.12	0.47	0.43	0.8	0.55	1.742	0.474	-1.87779	9.18129e-05	0.000724192	snk	PREDICTED: serine protease snake [Bactrocera dorsalis]	Organismal Systems	Immune system	ko04624//Toll and Imd signaling pathway	K20675	-	-	-
LOC105228386	43	12	22	21	1	4	1	6	2	4	6.03	1.77	2.92	2.21	0.13	0.36	0.1	0.56	0.17	0.27	2.612	0.292	-3.16111	0.00010064	0.00078799	-	-	-	-	-	-	-	-	-
LOC105224730	2	4	1	5	17	26	44	56	21	64	0.14	0.3	0.07	0.27	1.16	1.22	2.27	2.69	0.93	2.24	0.388	1.87	2.26891	0.00010391	0.000809805	Hpd	PREDICTED: 4-hydroxyphenylpyruvate dioxygenase [Bactrocera dorsalis]	Metabolism;Metabolism;Metabolism;Metabolism	Global and overview maps;Amino acid metabolism;Metabolism of cofactors and vitamins;Amino acid metabolism	ko01100//Metabolic pathways;ko00350//Tyrosine metabolism;ko00130//Ubiquinone and other terpenoid-quinone biosynthesis;ko00360//Phenylalanine metabolism	K00457;K00457;K00457;K00457	-	GO:0016491//oxidoreductase activity;GO:0043169//cation binding	GO:0006520//cellular amino acid metabolic process
LOC105228684	10	8	23	17	18	50	32	58	56	57	0.4	0.34	0.88	0.52	0.68	1.31	0.92	1.55	1.39	1.11	0.564	1.256	1.15507	0.000104312	0.000811754	SDE3	PREDICTED: putative helicase MOV-10 isoform X1 [Bactrocera dorsalis]	-	-	-	-	-	-	-
LOC105221867	422	663	546	487	547	283	479	251	499	217	59.73	98.68	73.11	51.82	72.72	25.95	48.28	23.56	43.39	14.86	71.212	31.208	-1.1902	0.00010545	0.000817462	Angptl3	PREDICTED: angiopoietin-2-like [Bactrocera dorsalis]	-	-	-	-	-	-	-
LOC105227015	22	36	64	72	74	41	34	18	23	33	0.62	0.92	1.2	1.21	1.16	0.49	0.4	0.2	0.26	0.33	1.022	0.336	-1.60486	0.000119499	0.000913094	foxn4	PREDICTED: serine-rich adhesin for platelets isoform X1 [Bactrocera oleae]	-	-	-	-	GO:0043231//intracellular membrane-bounded organelle	GO:0001071//nucleic acid binding transcription factor activity;GO:0003677//DNA binding	GO:0010468//regulation of gene expression;GO:0034645//cellular macromolecule biosynthetic process
LOC105227727	3809	3614	2481	3628	4044	1710	3276	2458	2954	1398	217.31	216.82	133.91	155.61	216.72	63.21	133.09	92.98	103.53	38.59	188.074	86.28	-1.1242	0.000120159	0.000916348	loxl2b	PREDICTED: lysyl oxidase homolog 2B [Bactrocera dorsalis]	-	-	-	-	-	GO:0016638//oxidoreductase activity, acting on the CH-NH2 group of donors;GO:0046914//transition metal ion binding	GO:0006897//endocytosis;GO:0044710//single-organism metabolic process
LOC105226268	0	0	0	0	0	59	1	7	3	6	0	0	0	0	0	2.6	0.05	0.32	0.13	0.2	0.001	0.66	9.36632	0.000121735	0.000927766	SLC17A5	PREDICTED: putative inorganic phosphate cotransporter [Bactrocera dorsalis]	-	-	-	-	-	-	GO:0044763//single-organism cellular process
LOC105231412	88	20	85	66	107	27	23	42	25	66	10.47	2.5	9.56	5.9	11.95	2.08	1.95	3.31	1.83	3.8	8.076	2.594	-1.63846	0.000125721	0.00095319	eloF	PREDICTED: elongation of very long chain fatty acids protein F-like [Bactrocera dorsalis]	-	-	-	-	GO:0031224//intrinsic component of membrane	GO:0003824//catalytic activity	GO:0006631//fatty acid metabolic process
LOC105230018	71	48	58	57	65	54	47	39	28	58	2.5	1.78	1.94	1.51	2.15	1.23	1.18	0.91	0.61	0.99	1.976	0.984	-1.00585	0.000126424	0.000957902	--	PREDICTED: insulin-like growth factor-binding protein complex acid labile subunit [Bactrocera dorsalis]	-	-	-	-	-	-	-
LOC105221909	4	3	3	6	3	0	0	0	0	0	0.34	0.27	0.24	0.39	0.24	0	0	0	0	0	0.296	0.001	-8.20945	0.000127428	0.000963637	-	-	-	-	-	-	-	-	-
LOC105227379	3	5	0	2	0	20	9	16	54	23	0.27	0.47	0	0.13	0	1.16	0.57	0.95	2.96	0.99	0.174	1.326	2.92992	0.000131809	0.000991017	--	PREDICTED: peritrophin-48 [Bactrocera dorsalis]	-	-	-	-	-	-	-
LOC105225674	22	27	35	47	32	16	13	25	23	31	1.37	1.77	2.06	2.2	1.87	0.65	0.58	1.03	0.88	0.93	1.854	0.814	-1.18754	0.000136642	0.00102081	C1GalTA	PREDICTED: glycoprotein-N-acetylgalactosamine 3-beta-galactosyltransferase 1-like [Bactrocera dorsalis]	Metabolism;Metabolism	Global and overview maps;Glycan biosynthesis and metabolism	ko01100//Metabolic pathways;ko00512//Mucin type O-glycan biosynthesis	K00731;K00731	-	-	-
LOC105225934	232	223	817	247	182	148	195	148	184	246	13.53	13.68	45.09	10.83	9.97	5.59	8.1	5.72	6.59	6.94	18.62	6.588	-1.49894	0.000140749	0.00104749	Glt	glutactin-like [Bactrocera dorsalis]	-	-	-	-	-	-	-
LOC105226859	15	15	16	34	25	48	35	71	85	109	0.69	0.73	0.7	1.18	1.09	1.44	1.15	2.18	2.42	2.44	0.878	1.926	1.13331	0.000141556	0.00105216	PNLIP	PREDICTED: pancreatic triacylglycerol lipase isoform X2 [Drosophila suzukii]	-	-	-	-	-	-	-
LOC105229696	16	44	82	23	3	4	6	0	12	7	3.4	9.82	16.47	3.67	0.6	0.55	0.91	0	1.57	0.72	6.792	0.75	-3.17887	0.000143291	0.00106304	--	PREDICTED: defensin-like [Bactrocera dorsalis]	-	-	-	-	-	-	-
LOC105229660	8	6	15	17	10	1	4	1	3	7	1.07	0.84	1.89	1.7	1.25	0.09	0.38	0.09	0.25	0.45	1.35	0.252	-2.42146	0.000143668	0.00106516	daao-1	D-aspartate oxidase [Bactrocera dorsalis]	Cellular Processes;Metabolism	Transport and catabolism;Amino acid metabolism	ko04146//Peroxisome;ko00250//Alanine, aspartate and glutamate metabolism	K00272;K00272	-	GO:0016638//oxidoreductase activity, acting on the CH-NH2 group of donors	GO:0044710//single-organism metabolic process
LOC105228103	6	22	17	9	20	56	31	75	58	83	0.5	1.94	1.35	0.57	1.57	3.04	1.85	4.17	2.99	3.36	1.186	3.082	1.37776	0.000147197	0.00108447	CP12	PREDICTED: larval cuticle protein LCP-17 [Bactrocera dorsalis]	-	-	-	-	-	GO:0005214//structural constituent of chitin-based cuticle	GO:0042335//cuticle development
MSTRG.7701	6	15	7	4	13	3	1	1	0	3	0.59	1.55	0.65	0.3	1.2	0.19	0.07	0.07	0	0.14	0.858	0.094	-3.19024	0.000155111	0.00113948	--	-	-	-	-	-	-	-	-
LOC105225958	41	22	37	45	15	14	20	12	14	27	3.79	2.14	3.24	3.13	1.3	0.84	1.32	0.74	0.79	1.21	2.72	0.98	-1.47275	0.000156253	0.00114687	--	PREDICTED: uncharacterized protein LOC105225958 [Bactrocera dorsalis]	-	-	-	-	-	-	-
LOC105233545	25	39	164	23	24	10	9	23	23	15	1.01	1.65	6.24	0.7	0.91	0.26	0.26	0.61	0.57	0.29	2.102	0.398	-2.40092	0.000158626	0.00116356	Ets21C	PREDICTED: DNA-binding protein D-ETS-6-like [Bactrocera dorsalis]	-	-	-	-	GO:0043231//intracellular membrane-bounded organelle	GO:0001071//nucleic acid binding transcription factor activity;GO:0003677//DNA binding	GO:0010468//regulation of gene expression
MSTRG.2082	121	100	121	125	108	43	30	98	99	108	27.85	24.21	26.35	21.71	23.35	6.41	4.92	14.96	14	12.03	24.694	10.464	-1.23873	0.000161611	0.00118176	--	-	-	-	-	-	-	-	-
LOC105223230	2	0	4	0	0	18	16	13	12	13	0.11	0	0.22	0	0	0.67	0.65	0.5	0.42	0.36	0.066	0.52	2.97797	0.000167967	0.00122518	--	PREDICTED: uncharacterized protein LOC105223230 [Bactrocera dorsalis]	-	-	-	-	-	-	-
LOC105231523	44	39	44	39	47	38	20	16	30	47	3.8	3.46	3.55	2.48	3.79	2.03	1.24	0.91	1.55	1.92	3.416	1.53	-1.15878	0.000170956	0.00124466	--	GM20373 [Drosophila sechellia]	-	-	-	-	-	-	-
LOC109579967	27	33	20	29	11	11	6	7	13	21	1.85	2.38	1.3	1.49	0.71	0.49	0.29	0.32	0.55	0.7	1.546	0.47	-1.71781	0.000173316	0.00125949	--	PREDICTED: vacuolar protein sorting-associated protein 28-like [Bactrocera cucurbitae]	-	-	-	-	-	-	-
LOC105224016	11	11	16	15	7	4	1	2	7	0	0.99	1.04	1.36	1.01	0.59	0.23	0.06	0.12	0.39	0	0.998	0.16	-2.64097	0.000176956	0.00128356	--	PREDICTED: protein matrimony [Bactrocera dorsalis]	-	-	-	-	-	-	-
LOC105227112	274	303	366	400	335	1032	494	681	1713	800	20.62	23.17	26.4	23.03	23.46	57.83	30.16	38.98	90.47	33.33	23.336	50.154	1.10381	0.00019292	0.00139076	--	PREDICTED: uncharacterized protein LOC105227112 isoform X2 [Bactrocera dorsalis]	-	-	-	-	-	-	-
LOC105227848	9	12	10	17	12	4	2	0	2	10	0.55	0.76	0.57	0.77	0.68	0.16	0.09	0	0.07	0.29	0.666	0.122	-2.44864	0.000193154	0.00139159	PLPP1	GM22446 [Drosophila sechellia]	Metabolism;Environmental Information Processing;Human Diseases;Metabolism;Organismal Systems;Metabolism;Metabolism;Organismal Systems;Metabolism	Global and overview maps;Signal transduction;Cancers;Lipid metabolism;Immune system;Lipid metabolism;Lipid metabolism;Digestive system;Lipid metabolism	ko01100//Metabolic pathways;ko04072//Phospholipase D signaling pathway;ko05231//Choline metabolism in cancer;ko00564//Glycerophospholipid metabolism;ko04666//Fc gamma R-mediated phagocytosis;ko00561//Glycerolipid metabolism;ko00600//Sphingolipid metabolism;ko04975//Fat digestion and absorption;ko00565//Ether lipid metabolism	K01080;K01080;K01080;K01080;K01080;K01080;K01080;K01080;K01080	-	-	GO:0008152//metabolic process
LOC105229914	96	89	81	142	94	87	97	57	37	85	1.28	1.25	1.02	1.42	1.18	0.75	0.92	0.5	0.3	0.55	1.23	0.604	-1.02604	0.000201044	0.0014393	ANKFN1	Ankyrin repeat and fibronectin type-III domain-containing protein 1, partial [Bactrocera dorsalis]	-	-	-	-	-	-	-
LOC105232350	2	4	3	2	0	20	23	19	8	16	0.09	0.2	0.13	0.07	0	0.61	0.78	0.6	0.23	0.37	0.098	0.518	2.4021	0.000204135	0.0014582	--	PREDICTED: uncharacterized protein LOC105232350 [Bactrocera dorsalis]	-	-	-	-	-	-	-
LOC105230703	8	1	4	1	1	11	24	19	23	54	0.38	0.05	0.18	0.04	0.04	0.33	0.79	0.58	0.65	1.21	0.138	0.712	2.36721	0.000204826	0.00146043	--	GL11053 [Drosophila persimilis]	-	-	-	-	-	-	-
LOC115066502	3	4	11	8	2	19	37	22	23	35	0.44	0.62	1.54	0.89	0.28	1.82	3.89	2.16	2.09	2.5	0.754	2.492	1.72467	0.000213378	0.00151221	--	PREDICTED: elongation of very long chain fatty acids protein AAEL008004, partial [Bactrocera latifrons]	-	-	-	-	GO:0031224//intrinsic component of membrane	GO:0004312//fatty acid synthase activity	GO:0006633//fatty acid biosynthetic process
LOC105233284	96	82	27	138	70	135	238	261	352	445	16.97	15.24	4.51	18.34	11.62	15.46	29.95	30.59	38.22	38.06	13.336	30.456	1.1914	0.000214464	0.00151807	--	PREDICTED: glycine-rich cell wall structural protein-like [Bactrocera dorsalis]	-	-	-	-	-	-	-
LOC105226465	118	169	221	129	106	78	88	128	88	166	16.63	25.05	29.47	13.67	14.04	7.12	8.83	11.96	7.62	11.32	19.772	9.37	-1.07734	0.00021696	0.00153389	--	GM14318 [Drosophila sechellia]	-	-	-	-	-	-	-
LOC105229356	19	6	8	20	20	34	40	57	96	63	3.98	1.29	1.55	3.14	3.9	4.51	5.9	7.79	12.09	6.25	2.772	7.308	1.39855	0.000229327	0.00161451	--	PREDICTED: cytochrome c oxidase subunit 7A1, mitochondrial [Bactrocera dorsalis]	-	-	-	-	GO:0044455//mitochondrial membrane part	GO:0009055//electron carrier activity	GO:0015992//proton transport
LOC105223187	15	4	6	7	5	1	0	0	0	3	2.38	0.62	0.86	0.89	0.71	0.11	0	0	0	0.2	1.092	0.062	-4.13856	0.000231288	0.00162636	--	PREDICTED: uncharacterized protein LOC105223187 [Bactrocera dorsalis]	-	-	-	-	-	-	-
LOC105225898	6	8	5	14	6	21	33	24	33	34	0.51	0.73	0.4	0.9	0.51	1.25	2.06	1.42	1.79	1.49	0.61	1.602	1.39299	0.000238652	0.00166914	--	PREDICTED: inosine-uridine preferring nucleoside hydrolase [Bactrocera dorsalis]	-	-	-	-	-	-	-
LOC105229117	13	7	6	9	14	4	1	0	3	5	0.58	0.33	0.25	0.3	0.59	0.12	0.03	0	0.08	0.11	0.41	0.068	-2.59202	0.000250436	0.00174843	SPR	PREDICTED: sex peptide receptor [Bactrocera dorsalis]	-	-	-	-	GO:0031224//intrinsic component of membrane	GO:0008528//G-protein coupled peptide receptor activity	GO:0007166//cell surface receptor signaling pathway
LOC105231780	4	3	9	2	2	0	0	0	0	0	0.96	0.76	2.04	0.36	0.45	0	0	0	0	0	0.914	0.001	-9.83605	0.00026205	0.00182084	CEC2	PREDICTED: cecropin-1-like [Bactrocera dorsalis]	Organismal Systems	Immune system	ko04624//Toll and Imd signaling pathway	K20696	-	-	GO:0006952//defense response;GO:0009617//response to bacterium
LOC105225367	2	1	3	7	1	23	14	24	8	25	0.32	0.17	0.45	0.84	0.15	2.37	1.59	2.53	0.78	1.92	0.386	1.838	2.25146	0.000268128	0.00185757	--	PREDICTED: pupal cuticle protein Edg-78E [Bactrocera dorsalis]	-	-	-	-	-	GO:0005214//structural constituent of chitin-based cuticle	GO:0042335//cuticle development
LOC105227371	17	26	17	14	15	13	10	4	5	8	0.56	0.9	0.53	0.35	0.47	0.28	0.24	0.09	0.1	0.13	0.562	0.168	-1.74211	0.000268922	0.00186197	POLH	PREDICTED: DNA polymerase eta [Bactrocera dorsalis]	Human Diseases;Genetic Information Processing	Drug resistance;Replication and repair	ko01524//Platinum drug resistance;ko03460//Fanconi anemia pathway	K03509;K03509	-	GO:0034061//DNA polymerase activity	GO:0006259//DNA metabolic process
LOC105229890	16	15	13	16	10	43	25	58	37	80	1.13	1.11	0.87	0.85	0.66	1.97	1.26	2.71	1.6	2.73	0.924	2.054	1.15247	0.000273833	0.00189375	-	-	-	-	-	-	-	-	-
MSTRG.7371	13	15	31	16	12	7	6	10	5	12	1.54	1.73	3.21	1.24	1.11	0.47	0.42	0.65	0.32	0.57	1.766	0.486	-1.86146	0.000293041	0.00200764	--	-	-	-	-	-	-	-	-
LOC105230509	29	59	38	51	66	38	39	22	17	37	0.35	0.74	0.43	0.46	0.74	0.29	0.33	0.17	0.12	0.21	0.544	0.224	-1.28011	0.00029558	0.00202031	Corin	Atrial natriuretic peptide-converting enzyme, partial [Bactrocera dorsalis]	-	-	-	-	-	GO:0070011//peptidase activity, acting on L-amino acid peptides	-
LOC105229041	51	32	51	53	32	44	21	23	32	36	1.43	0.94	1.35	1.12	0.84	0.8	0.42	0.43	0.55	0.49	1.136	0.538	-1.07828	0.000304928	0.00207574	--	PREDICTED: homeobox protein 13 [Bactrocera dorsalis]	-	-	-	-	-	-	-
LOC105225365	0	3	3	0	4	8	18	11	27	29	0	0.16	0.11	0	0.19	0.26	0.55	0.31	0.53	0.55	0.092	0.44	2.2578	0.000309277	0.00210412	--	RE16208p [Drosophila melanogaster]	-	-	-	-	-	-	-
LOC105230292	30	18	30	38	33	13	17	18	25	29	1.01	0.64	0.96	0.97	1.05	0.28	0.41	0.4	0.52	0.47	0.926	0.416	-1.15443	0.000325858	0.00220924	--	PREDICTED: nose resistant to fluoxetine protein 6 isoform X1 [Bactrocera dorsalis]	-	-	-	-	-	-	-
LOC105226035	52	45	42	72	51	34	19	37	29	73	3.32	3.01	2.53	3.43	3.05	1.41	0.86	1.56	1.14	2.26	3.068	1.446	-1.08523	0.000361324	0.00241068	Cyp6d4	PREDICTED: probable cytochrome P450 6d4 [Bactrocera dorsalis]	-	-	-	-	-	GO:0016491//oxidoreductase activity;GO:0046872//metal ion binding;GO:0046906//tetrapyrrole binding	GO:0007423//sensory organ development;GO:0007444//imaginal disc development;GO:0044710//single-organism metabolic process
LOC105229842	47	91	108	59	41	32	49	46	42	52	4.33	8.81	9.41	4.09	3.55	1.91	3.21	2.81	2.38	2.32	6.038	2.526	-1.25722	0.000364071	0.00242762	--	GH22629 [Drosophila grimshawi]	-	-	-	-	-	-	-
MSTRG.9422	4	4	11	17	12	30	43	31	29	38	0.65	0.68	1.69	2.08	1.83	3.16	4.98	3.34	2.9	2.99	1.386	3.474	1.32567	0.000378346	0.00251162	--	-	-	-	-	-	-	-	-
LOC105230349	0	0	1	0	0	7	2	15	8	7	0	0	0.12	0	0	0.57	0.18	1.24	0.61	0.42	0.024	0.604	4.65344	0.000391481	0.00258978	LCP1	PREDICTED: endocuticle structural glycoprotein SgAbd-2 [Bactrocera dorsalis]	-	-	-	-	-	-	-
LOC105225547	26	29	12	16	20	99	39	69	68	76	2.8	3.28	1.22	1.29	2.02	6.91	2.99	4.93	4.5	3.96	2.122	4.658	1.13429	0.000392698	0.0025949	SDR-1	PREDICTED: LOW QUALITY PROTEIN: farnesol dehydrogenase [Bactrocera dorsalis]	-	-	-	-	-	GO:0003824//catalytic activity	GO:0044710//single-organism metabolic process
LOC105233901	5	4	11	11	7	0	2	1	0	4	0.09	0.08	0.19	0.15	0.12	0	0.03	0.01	0	0.03	0.126	0.014	-3.16993	0.00039752	0.00262086	--	PREDICTED: flocculation protein FLO11 [Bactrocera dorsalis]	-	-	-	-	-	-	-
LOC105230539	13	2	12	19	16	4	0	1	6	1	1.36	0.24	1.18	1.49	1.57	0.29	0	0.07	0.42	0.06	1.168	0.168	-2.79751	0.000401391	0.00264322	MAPRE1	PREDICTED: microtubule-associated protein RP/EB family member 2 isoform X1 [Bactrocera dorsalis]	-	-	-	-	-	-	-
LOC105229772	27	135	107	73	62	192	197	275	304	439	4.09	21.49	15.32	8.31	8.82	18.83	21.24	27.6	28.27	32.16	11.606	25.62	1.1424	0.000401588	0.00264322	--	PREDICTED: acanthoscurrin-2-like isoform X1 [Bactrocera dorsalis]	-	-	-	-	-	-	-
LOC105224512	18	4	23	44	49	15	5	11	8	9	1.11	0.26	1.34	2.03	2.83	0.6	0.22	0.45	0.3	0.27	1.514	0.368	-2.04059	0.000421728	0.00276338	Aldh1b1	PREDICTED: aldehyde dehydrogenase X, mitochondrial-like [Bactrocera dorsalis]	Metabolism;Metabolism;Metabolism;Metabolism;Metabolism;Metabolism;Metabolism;Metabolism;Metabolism;Metabolism;Metabolism;Metabolism;Metabolism	Global and overview maps;Carbohydrate metabolism;Lipid metabolism;Amino acid metabolism;Carbohydrate metabolism;Amino acid metabolism;Metabolism of terpenoids and polyketides;Lipid metabolism;Amino acid metabolism;Carbohydrate metabolism;Amino acid metabolism;Metabolism of other amino acids;Amino acid metabolism	ko01100//Metabolic pathways;ko00010//Glycolysis / Gluconeogenesis;ko00561//Glycerolipid metabolism;ko00310//Lysine degradation;ko00620//Pyruvate metabolism;ko00330//Arginine and proline metabolism;ko00981//Insect hormone biosynthesis;ko00071//Fatty acid degradation;ko00280//Valine, leucine and isoleucine degradation;ko00053//Ascorbate and aldarate metabolism;ko00380//Tryptophan metabolism;ko00410…	K00128;K00128;K00128;K00128;K00128;K00128;K00128;K00128;K00128;K00128;K00128;K00128;K00128	-	GO:0016903//oxidoreductase activity, acting on the aldehyde or oxo group of donors	GO:0044710//single-organism metabolic process
LOC105231831	154	71	196	156	183	110	96	96	72	200	10.79	5.23	12.99	8.22	12.04	4.99	4.79	4.46	3.1	6.78	9.854	4.824	-1.03048	0.000441589	0.00288385	--	PREDICTED: transmembrane protein 135-like [Rhagoletis zephyria]	-	-	-	-	-	-	-
LOC105229185	4	4	4	2	0	11	13	20	16	28	0.3	0.31	0.28	0.11	0	0.53	0.69	0.98	0.73	1.01	0.2	0.788	1.9782	0.000442231	0.00288644	--	PREDICTED: angiotensin-converting enzyme [Bactrocera dorsalis]	Human Diseases;Organismal Systems;Human Diseases;Organismal Systems	Infectious diseases;Endocrine system;Cardiovascular diseases;Endocrine system	ko05142//Chagas disease (American trypanosomiasis);ko04924//Renin secretion;ko05410//Hypertrophic cardiomyopathy (HCM);ko04614//Renin-angiotensin system	K01283;K01283;K01283;K01283	-	GO:0004104//cholinesterase activity;GO:0008238//exopeptidase activity;GO:0043169//cation binding	GO:0006581//acetylcholine catabolic process;GO:0019538//protein metabolic process
LOC105232879	15	26	10	27	5	46	46	59	61	91	0.53	0.96	0.33	0.71	0.16	1.05	1.15	1.37	1.31	1.55	0.538	1.286	1.25721	0.00044337	0.00289065	AVT2	CG13743, partial [Drosophila busckii]	-	-	-	-	GO:0031224//intrinsic component of membrane	-	-
MSTRG.7786	2	8	5	1	7	0	0	0	1	0	0.53	2.24	1.26	0.2	1.75	0	0	0	0.16	0	1.196	0.032	-5.224	0.00045274	0.0029452	--	-	-	-	-	-	-	-	-
LOC105233155	43	35	49	72	58	37	33	46	20	56	5.33	4.57	5.75	6.72	6.76	2.97	2.92	3.78	1.52	3.36	5.826	2.91	-1.00149	0.00046342	0.00300467	-	-	-	-	-	-	-	-	-
LOC105222464	343	350	856	302	496	387	228	309	395	407	46.04	49.4	108.7	30.47	62.53	33.66	21.79	27.5	32.57	26.43	59.428	28.39	-1.06576	0.000483943	0.00311878	Hsp23	PREDICTED: heat shock protein 23-like [Bactrocera dorsalis]	-	-	-	-	-	-	-
LOC105225935	10	4	7	9	6	18	27	22	29	36	1.61	0.68	1.06	1.09	0.91	1.87	3.09	2.34	2.86	2.8	1.07	2.592	1.27645	0.000486779	0.00313533	CG14105	PREDICTED: tetratricopeptide repeat protein 36 homolog [Bactrocera dorsalis]	-	-	-	-	-	-	-
LOC105222143	54	124	60	116	85	268	409	154	415	172	2.61	6.29	2.74	4.21	3.85	8.38	14.06	4.93	12.31	4.02	3.94	8.74	1.14944	0.000492613	0.00316248	--	PREDICTED: uncharacterized protein LOC105222143 [Bactrocera dorsalis]	-	-	-	-	-	-	-
LOC105229191	0	0	0	0	0	3	5	8	3	9	0	0	0	0	0	0.11	0.19	0.29	0.1	0.24	0.001	0.186	7.53916	0.000561064	0.00354103	--	PREDICTED: sodium channel protein Nach [Ceratitis capitata]	-	-	-	-	GO:0031224//intrinsic component of membrane	-	GO:0006814//sodium ion transport
LOC105228391	0	1	0	0	0	8	2	16	11	3	0	0.09	0	0	0	0.46	0.13	0.93	0.6	0.13	0.018	0.45	4.64386	0.000590766	0.00371732	TRYP4	PREDICTED: trypsin beta [Bactrocera dorsalis]	Human Diseases;Organismal Systems;Environmental Information Processing;Organismal Systems	Infectious diseases;Digestive system;Signaling molecules and interaction;Digestive system	ko05164//Influenza A;ko04972//Pancreatic secretion;ko04080//Neuroactive ligand-receptor interaction;ko04974//Protein digestion and absorption	K01312;K01312;K01312;K01312	-	GO:0070011//peptidase activity, acting on L-amino acid peptides	-
LOC105231751	5	2	3	4	0	20	12	18	13	17	0.17	0.07	0.1	0.1	0	0.44	0.29	0.4	0.27	0.28	0.088	0.336	1.93289	0.000596171	0.00374731	--	GL23192 [Drosophila persimilis]	-	-	-	-	-	-	-
LOC105233744	2	4	7	10	8	1	2	0	1	0	0.15	0.32	0.51	0.57	0.57	0.05	0.11	0	0.05	0	0.424	0.042	-3.3356	0.000613149	0.00384579	PK1-R	PREDICTED: tachykinin-like peptides receptor 99D isoform X1 [Bactrocera latifrons]	Environmental Information Processing	Signaling molecules and interaction	ko04080//Neuroactive ligand-receptor interaction	K05052	-	-	-
LOC105225110	15	16	31	38	26	18	11	10	5	25	1.01	1.13	1.97	1.92	1.64	0.78	0.53	0.44	0.21	0.81	1.534	0.554	-1.46934	0.000634893	0.00396521	pla1a	PREDICTED: phospholipase A1 member A isoform X1 [Bactrocera dorsalis]	-	-	-	-	-	GO:0016788//hydrolase activity, acting on ester bonds	-
LOC105234261	20265	8258	21302	19312	29327	12303	11641	13162	6296	22983	591.69	253.56	588.43	423.91	804.33	232.75	242.04	254.82	112.93	324.71	532.384	233.45	-1.18935	0.000635346	0.00396592	Cyp4g1	Cytochrome P450 4g1 [Bactrocera dorsalis]	-	-	-	-	-	GO:0016491//oxidoreductase activity;GO:0046906//tetrapyrrole binding;GO:0046914//transition metal ion binding	GO:0044710//single-organism metabolic process
LOC105225897	108	160	116	183	230	191	108	84	64	97	5.12	7.98	5.21	6.53	10.25	5.87	3.65	2.64	1.87	2.23	7.018	3.252	-1.10973	0.000638198	0.00398125	-	-	-	-	-	-	-	-	-
LOC105230299	14	23	15	3	14	8	5	2	3	2	0.77	1.32	0.78	0.12	0.72	0.28	0.19	0.07	0.1	0.05	0.742	0.138	-2.42675	0.00063852	0.00398125	--	PREDICTED: arrestin domain-containing protein 3 [Bactrocera dorsalis]	-	-	-	-	-	-	-
LOC115065711	54	50	126	87	65	40	36	33	71	86	24.42	23.53	53.66	29.46	27.43	11.8	11.55	10.01	19.56	18.87	31.7	14.358	-1.14263	0.000651049	0.00404243	--	PREDICTED: rRNA 2'-O-methyltransferase fibrillarin-like [Bactrocera latifrons]	-	-	-	-	-	-	-
LOC105229838	28	19	24	43	14	15	10	21	12	16	0.99	0.7	0.8	1.14	0.46	0.34	0.25	0.49	0.22	0.27	0.818	0.314	-1.38134	0.000657059	0.00407113	--	AAEL007579-PA [Aedes aegypti]	-	-	-	-	-	-	-
LOC105229424	5	8	16	22	9	5	7	2	2	4	0.42	0.71	1.27	1.39	0.71	0.27	0.42	0.11	0.1	0.16	0.9	0.212	-2.08586	0.000659374	0.00408116	mpv17l	PREDICTED: mpv17-like protein [Bactrocera dorsalis]	Cellular Processes	Transport and catabolism	ko04146//Peroxisome	K13349	-	-	-
LOC105221932	31	12	12	28	19	9	10	14	9	5	0.76	0.31	0.28	0.51	0.44	0.14	0.17	0.23	0.14	0.06	0.46	0.148	-1.63604	0.000679015	0.0041949	--	PREDICTED: keratin, type II cytoskeletal 1b [Bactrocera latifrons]	-	-	-	-	-	-	-
MSTRG.15242	0	1	0	0	0	9	6	2	11	6	0	0.38	0	0	0	2.15	1.68	0.49	2.49	1.08	0.076	1.578	4.37595	0.000688138	0.00424129	--	-	-	-	-	-	-	-	-
LOC105234181	16	19	19	35	20	18	2	7	8	19	3.79	4.73	4.26	6.23	4.45	2.76	0.34	1.1	1.16	2.18	4.692	1.508	-1.63757	0.000705966	0.00433522	--	Circadian clock-controlled protein [Bactrocera dorsalis]	-	-	-	-	-	-	-
LOC105229149	61	284	175	55	71	33	92	62	46	59	1.45	7.12	3.94	0.99	1.59	0.51	1.56	0.98	0.67	0.68	3.018	0.88	-1.77802	0.000726279	0.00444368	Nos	PREDICTED: nitric oxide synthase [Bactrocera dorsalis]	Metabolism;Human Diseases;Cellular Processes;Environmental Information Processing;Organismal Systems;Organismal Systems;Environmental Information Processing;Organismal Systems;Metabolism;Organismal Systems;Human Diseases;Metabolism	Global and overview maps;Neurodegenerative diseases;Transport and catabolism;Signal transduction;Digestive system;Endocrine system;Signal transduction;Environmental adaptation;Amino acid metabolism;Nervous system;Neurodegenerative diseases;Amino acid metabolism	ko01100//Metabolic pathways;ko05010//Alzheimer disease;ko04145//Phagosome;ko04020//Calcium signaling pathway;ko04970//Salivary secretion;ko04926//Relaxin signaling pathway;ko04371//Apelin signaling pathway;ko04713//Circadian entrainment;ko00330//Arginine and proline metabolism;ko04730//Long-term depression;ko05014//Amyotrophic lateral sclerosis (ALS);ko00220//Arginine biosynthesis	K13240;K13240;K13240;K13240;K13240;K13240;K13240;K13240;K13240;K13240;K13240;K13240	-	GO:0003676//nucleic acid binding;GO:0003824//catalytic activity;GO:0005515//protein binding;GO:0032553//ribonucleotide binding;GO:0046906//tetrapyrrole binding;GO:0046914//transition metal ion binding	GO:0044271//cellular nitrogen compound biosynthetic process;GO:0044710//single-organism metabolic process
LOC105227312	10	36	39	65	38	24	15	16	10	35	0.2	0.75	0.73	0.97	0.71	0.31	0.21	0.21	0.12	0.34	0.672	0.238	-1.4975	0.000734329	0.00447891	Sema2a	PREDICTED: semaphorin-2A [Bactrocera dorsalis]	-	-	-	-	-	-	GO:0044707//single-multicellular organism process
LOC105224463	2	13	14	18	9	56	23	40	38	47	0.09	0.6	0.58	0.59	0.37	1.59	0.72	1.16	1.02	1	0.446	1.098	1.29976	0.000752728	0.00456974	TkR99D	PREDICTED: prolactin-releasing peptide receptor [Bactrocera dorsalis]	-	-	-	-	GO:0031224//intrinsic component of membrane	GO:0008188//neuropeptide receptor activity	GO:0007186//G-protein coupled receptor signaling pathway
MSTRG.5892	8	5	2	6	7	16	19	24	24	28	0.77	0.51	0.18	0.43	0.63	1	1.3	1.53	1.42	1.3	0.504	1.31	1.37807	0.000754197	0.00457393	--	-	-	-	-	-	-	-	-
LOC105229836	5	6	2	6	9	18	22	46	15	30	0.25	0.32	0.09	0.23	0.42	0.58	0.78	1.52	0.46	0.73	0.262	0.814	1.63546	0.0007669	0.0046462	--	PREDICTED: uncharacterized protein LOC105229836 [Bactrocera dorsalis]	-	-	-	-	-	-	-
LOC105222704	5	5	0	11	3	0	0	0	0	0	0.29	0.3	0	0.48	0.16	0	0	0	0	0	0.246	0.001	-7.94251	0.000767303	0.0046462	-	-	-	-	-	-	-	-	-
LOC105232283	0	1	1	1	13	28	13	25	34	47	0	0.05	0.04	0.03	0.53	0.78	0.4	0.71	0.9	0.98	0.13	0.754	2.53605	0.000783705	0.0047333	--	Multiple epidermal growth factor-like domains protein 10 [Bactrocera dorsalis]	-	-	-	-	-	-	-
LOC105224525	4	5	1	2	5	12	19	18	17	19	0.27	0.36	0.06	0.1	0.32	0.53	0.93	0.81	0.71	0.63	0.222	0.722	1.70144	0.00079805	0.0048051	Gr43a	PREDICTED: gustatory receptor for sugar taste 43a [Bactrocera dorsalis]	-	-	-	-	GO:0031224//intrinsic component of membrane	-	GO:0007606//sensory perception of chemical stimulus
LOC105228734	17	13	19	30	18	7	4	14	15	14	3.36	2.7	3.55	4.45	3.34	0.9	0.56	1.83	1.82	1.34	3.48	1.29	-1.43172	0.000917274	0.00542248	-	-	-	-	-	-	-	-	-
LOC105231403	1	316	2	0	117	3	2	2	5	0	0.16	52.39	0.3	0	17.33	0.31	0.22	0.21	0.48	0	14.036	0.244	-5.84611	0.000927392	0.00547152	-	-	-	-	-	-	-	-	-
LOC105233159	0	0	0	0	1	5	6	8	6	4	0	0	0	0	0.06	0.21	0.28	0.34	0.24	0.13	0.012	0.24	4.32193	0.000928239	0.00547376	Cyp6t1	PREDICTED: probable cytochrome P450 6t1 [Bactrocera dorsalis]	-	-	-	-	-	GO:0016491//oxidoreductase activity;GO:0046872//metal ion binding;GO:0046906//tetrapyrrole binding	GO:0044710//single-organism metabolic process
LOC105225182	50	35	36	59	143	427	192	145	164	214	2.05	1.5	1.4	1.83	5.49	10.83	5.63	3.9	3.96	3.84	2.454	5.632	1.19851	0.000931307	0.00548909	--	PREDICTED: mucin-5AC isoform X3 [Bactrocera dorsalis]	-	-	-	-	-	-	-
LOC105226314	8	4	22	14	13	4	5	6	1	5	0.23	0.12	0.6	0.3	0.35	0.07	0.1	0.12	0.02	0.07	0.32	0.076	-2.074	0.000944264	0.0055543	-	-	-	-	-	-	-	-	-
LOC105230837	6	50	335	208	174	5	1	2	1	69	0.39	3.43	20.7	10.21	10.67	0.21	0.05	0.09	0.04	2.18	9.08	0.514	-4.14285	0.000950536	0.00557686	Cyp313a4	PREDICTED: probable cytochrome P450 313a4 [Bactrocera dorsalis]	-	-	-	-	-	-	-
LOC105231689	5	6	3	2	2	0	0	0	1	0	0.89	1.12	0.5	0.27	0.33	0	0	0	0.11	0	0.622	0.022	-4.82134	0.000951066	0.00557686	--	GH15731 [Drosophila grimshawi]	-	-	-	-	-	-	-
LOC105222944	4	7	13	4	12	57	14	29	36	41	0.39	0.71	1.19	0.29	1.09	3.58	0.97	1.87	2.15	1.93	0.734	2.1	1.51654	0.000955148	0.00559587	Hayan	PREDICTED: serine protease Hayan [Bactrocera dorsalis]	-	-	-	-	-	-	-
LOC105232713	9	2	11	28	8	0	0	1	0	7	0.21	0.05	0.25	0.5	0.18	0	0	0.02	0	0.08	0.238	0.02	-3.57289	0.000958454	0.00560963	--	PREDICTED: titin [Bactrocera dorsalis]	-	-	-	-	-	-	-
LOC105229920	14	11	12	13	9	0	3	9	2	6	1.12	0.92	0.91	0.78	0.67	0	0.17	0.48	0.1	0.23	0.88	0.196	-2.16665	0.000976779	0.00570266	mas	PREDICTED: melanization protease 1 [Bactrocera dorsalis]	-	-	-	-	-	GO:0016787//hydrolase activity	-
LOC105224397	30	29	46	31	22	23	19	16	25	32	2.9	2.71	4.11	2.15	1.83	1.48	1.21	1	1.39	1.47	2.74	1.31	-1.06461	0.00098704	0.0057454	SDR16C5	PREDICTED: epidermal retinol dehydrogenase 2 isoform X1 [Bactrocera dorsalis]	-	-	-	-	-	GO:0003824//catalytic activity	GO:0044710//single-organism metabolic process
LOC105229130	10	7	22	18	13	30	48	53	37	47	0.97	0.71	2.02	1.31	1.18	1.88	3.31	3.4	2.2	2.2	1.238	2.598	1.06939	0.00107378	0.00618885	hsdl2	PREDICTED: hydroxysteroid dehydrogenase-like protein 2 [Bactrocera dorsalis]	-	-	-	-	-	GO:0003824//catalytic activity	GO:0044710//single-organism metabolic process
LOC105222769	163	89	214	182	317	182	121	138	72	172	6.77	3.88	8.39	5.67	12.32	4.89	3.56	3.79	1.84	3.45	7.406	3.506	-1.07887	0.00107656	0.00620184	wat	GH24373 [Drosophila grimshawi]	Cellular Processes;Organismal Systems;Metabolism	Transport and catabolism;Aging;Lipid metabolism	ko04146//Peroxisome;ko04212//Longevity regulating pathway - worm;ko00073//Cutin, suberine and wax biosynthesis	K13356;K13356;K13356	-	-	-
LOC105231519	33	26	34	62	29	23	25	13	9	44	0.58	0.45	0.53	0.79	0.45	0.24	0.29	0.14	0.09	0.45	0.56	0.242	-1.21042	0.00109708	0.00630147	tinc	PREDICTED: protein tincar isoform X1 [Bactrocera dorsalis]	-	-	-	-	-	-	-
LOC105233319	12	7	11	11	5	7	2	1	3	2	0.4	0.25	0.35	0.28	0.16	0.15	0.05	0.02	0.06	0.03	0.288	0.062	-2.21573	0.00110744	0.00634544	lz	PREDICTED: protein lozenge [Bactrocera dorsalis]	Environmental Information Processing	Signal transduction	ko04013//MAPK signaling pathway - fly	K20214	-	-	-
LOC105229511	12	11	10	12	13	6	7	6	4	1	1.35	1.3	1.07	1.02	1.38	0.44	0.56	0.45	0.28	0.05	1.224	0.356	-1.78165	0.00112879	0.00645997	EURM3	PREDICTED: chymotrypsin-2 [Bactrocera dorsalis]	-	-	-	-	-	GO:0070011//peptidase activity, acting on L-amino acid peptides	-
LOC105232367	19	40	46	14	28	121	98	45	193	102	2.72	6.03	6.23	1.51	3.77	11.23	10	4.27	16.98	7.07	4.052	9.91	1.29025	0.00128034	0.00719363	--	PREDICTED: uncharacterized protein LOC105232367 [Bactrocera dorsalis]	-	-	-	-	-	-	-
LOC105232422	6	1	7	5	1	0	0	0	1	0	0.25	0.04	0.27	0.16	0.04	0	0	0	0.03	0	0.152	0.006	-4.66297	0.00130093	0.00730076	CTRB1	PREDICTED: serine proteinase stubble [Bactrocera dorsalis]	-	-	-	-	-	GO:0004175//endopeptidase activity	GO:0019538//protein metabolic process
LOC105221774	0	0	0	0	0	9	2	1	6	14	0	0	0	0	0	0.22	0.05	0.03	0.14	0.26	0.001	0.14	7.12928	0.00130777	0.00733566	-	-	-	-	-	-	-	-	-
MSTRG.1523	1	6	6	11	7	0	2	0	1	2	0.15	0.98	0.88	1.28	1.02	0	0.22	0	0.1	0.15	0.862	0.094	-3.19696	0.00136864	0.00763688	--	-	-	-	-	-	-	-	-
LOC105232632	4	0	1	1	4	13	12	10	11	18	0.17	0	0.05	0.03	0.2	0.41	0.41	0.32	0.33	0.41	0.09	0.376	2.06274	0.00140472	0.00782332	--	GL25327 [Drosophila persimilis]	-	-	-	-	-	-	-
LOC105228038	18	5	17	22	7	5	5	7	6	8	0.7	0.22	0.62	0.64	0.24	0.14	0.15	0.19	0.15	0.16	0.484	0.158	-1.61508	0.0014486	0.00801344	Cyp6a14	PREDICTED: probable cytochrome P450 6a14 [Bactrocera dorsalis]	-	-	-	-	-	GO:0005488//binding	-
LOC105232240	3	4	8	7	5	19	13	19	17	38	0.09	0.13	0.23	0.16	0.14	0.38	0.28	0.39	0.32	0.56	0.15	0.386	1.36364	0.00153731	0.00844155	bi	PREDICTED: optomotor-blind protein-like [Bactrocera dorsalis]	Environmental Information Processing	Signal transduction	ko04013//MAPK signaling pathway - fly	K10176	-	-	-
LOC109579568	4	2	4	8	4	0	2	0	0	0	0.48	0.25	0.46	0.73	0.46	0	0.17	0	0	0	0.476	0.034	-3.80735	0.00154401	0.00847435	LysP	PREDICTED: lysozyme 1 [Bactrocera dorsalis]	-	-	-	-	-	-	-
LOC105233037	0	2	3	0	1	9	18	11	6	11	0	0.18	0.24	0	0.08	0.5	1.1	0.62	0.32	0.46	0.1	0.6	2.58496	0.00159014	0.00870715	--	PREDICTED: venom allergen 5 [Bactrocera dorsalis]	-	-	-	-	-	-	-
LOC105227319	0	10	7	19	6	1	0	1	3	1	0	0.4	0.25	0.54	0.21	0.02	0	0.03	0.07	0.02	0.28	0.028	-3.32193	0.00159752	0.00873125	-	-	-	-	-	-	-	-	-
LOC105223223	4	2	4	4	1	18	11	7	21	20	0.08	0.04	0.08	0.06	0.02	0.24	0.16	0.1	0.27	0.2	0.056	0.194	1.79256	0.00167589	0.00909605	--	PREDICTED: sal-like protein 1 [Bactrocera dorsalis]	-	-	-	-	-	-	-
LOC105223706	5	5	2	8	3	1	0	0	1	1	1.56	1.64	0.59	1.87	0.88	0.2	0	0	0.19	0.15	1.308	0.108	-3.59826	0.00178216	0.00960612	--	PREDICTED: glycine-rich cell wall structural protein-like [Bactrocera dorsalis]	-	-	-	-	-	-	-
LOC115066658	3	0	1	2	0	18	4	8	12	13	1.12	0	0.35	0.56	0	4.36	1.07	1.98	2.76	2.35	0.406	2.504	2.62468	0.00189824	0.0101433	--	Ecdysteroid UDP-glucosyltransferase, partial [Bactrocera dorsalis]	Metabolism;Metabolism;Metabolism;Metabolism;Human Diseases;Metabolism;Organismal Systems;Metabolism;Metabolism;Metabolism;Metabolism	Global and overview maps;Xenobiotics biodegradation and metabolism;Xenobiotics biodegradation and metabolism;Xenobiotics biodegradation and metabolism;Cancers;Carbohydrate metabolism;Digestive system;Metabolism of cofactors and vitamins;Metabolism of cofactors and vitamins;Carbohydrate metabolism;Lipid metabolism	ko01100//Metabolic pathways;ko00983//Drug metabolism - other enzymes;ko00980//Metabolism of xenobiotics by cytochrome P450;ko00982//Drug metabolism - cytochrome P450;ko05204//Chemical carcinogenesis;ko00040//Pentose and glucuronate interconversions;ko04976//Bile secretion;ko00860//Porphyrin and chlorophyll metabolism;ko00830//Retinol metabolism;ko00053//Ascorbate and aldarate metabolism;ko00140//…	K00699;K00699;K00699;K00699;K00699;K00699;K00699;K00699;K00699;K00699;K00699	-	GO:0016757//transferase activity, transferring glycosyl groups	-
MSTRG.11279	1	1	2	6	4	12	19	12	7	27	0.1	0.1	0.18	0.44	0.36	0.75	1.3	0.77	0.41	1.26	0.236	0.898	1.92793	0.00192324	0.0102581	--	mariner mos1 transposase [Lasius niger]	-	-	-	-	-	-	-
LOC105226346	57	105	70	84	53	45	30	61	58	97	4.21	8.27	5.09	4.77	3.63	2.19	1.54	2.99	2.62	3.5	5.194	2.568	-1.0162	0.00196412	0.0104429	--	PREDICTED: extensin isoform X1 [Bactrocera dorsalis]	-	-	-	-	-	-	-
LOC105223565	4	2	2	6	5	1	0	1	0	0	0.5	0.26	0.24	0.57	0.59	0.08	0	0.08	0	0	0.432	0.032	-3.75489	0.00234836	0.0121822	--	GH11885 [Drosophila grimshawi]	Cellular Processes	Transport and catabolism	ko04142//Lysosome	K12383	-	-	-
LOC105232749	365	428	450	370	258	124	195	399	230	505	66.27	81.71	77.29	50.5	44	14.59	25.21	48.03	25.65	44.36	63.954	31.568	-1.01857	0.00257967	0.0131781	CP12	PREDICTED: endocuticle structural protein SgAbd-6-like [Bactrocera dorsalis]	-	-	-	-	-	-	-
LOC105223598	20	0	19	0	1	0	0	0	0	0	3.27	0	2.94	0	0.15	0	0	0	0	0	1.272	0.001	-10.3129	0.00258817	0.01321	--	PREDICTED: uncharacterized protein LOC105223598 [Bactrocera dorsalis]	-	-	-	-	-	-	-
LOC105225803	51	54	46	90	106	81	25	46	14	36	7.03	7.73	6.11	9.33	13.2	6.93	2.58	4.42	1.27	2.54	8.68	3.548	-1.29069	0.00264279	0.0134595	gpmA	PREDICTED: phosphoglycerate mutase 2 isoform X1 [Bactrocera cucurbitae]	Metabolism;Metabolism;Metabolism;Organismal Systems;Metabolism;Human Diseases;Metabolism	Global and overview maps;Global and overview maps;Global and overview maps;Endocrine system;Carbohydrate metabolism;Cancers;Amino acid metabolism	ko01100//Metabolic pathways;ko01200//Carbon metabolism;ko01230//Biosynthesis of amino acids;ko04922//Glucagon signaling pathway;ko00010//Glycolysis / Gluconeogenesis;ko05230//Central carbon metabolism in cancer;ko00260//Glycine, serine and threonine metabolism	K01834;K01834;K01834;K01834;K01834;K01834;K01834	-	GO:0016868//intramolecular transferase activity, phosphotransferases	GO:0006090//pyruvate metabolic process
LOC105232301	40	50	21	30	34	20	22	31	11	32	0.61	0.81	0.31	0.35	0.49	0.2	0.24	0.32	0.1	0.24	0.514	0.22	-1.22426	0.00264407	0.0134602	Lhcgr	Leucine-rich repeat-containing G-protein coupled receptor 4 [Ceratitis capitata]	-	-	-	-	GO:0016021//integral component of membrane	GO:0008528//G-protein coupled peptide receptor activity	GO:0000904//cell morphogenesis involved in differentiation;GO:0007186//G-protein coupled receptor signaling pathway;GO:2000026//regulation of multicellular organismal development
LOC105226305	21	8	57	14	14	10	8	11	3	16	0.43	0.17	1.11	0.22	0.27	0.13	0.12	0.15	0.04	0.16	0.44	0.12	-1.87447	0.00266326	0.0135402	-	-	-	-	-	-	-	-	-
LOC105228810	38	43	57	111	53	66	42	34	23	52	1.31	1.56	1.87	2.89	1.72	1.48	1.03	0.78	0.49	0.87	1.87	0.93	-1.00774	0.00272265	0.0138182	NetA	PREDICTED: netrin-A isoform X1 [Bactrocera dorsalis]	Organismal Systems	Development	ko04360//Axon guidance	K06843	-	-	-
LOC105233802	0	0	1	1	0	1	6	7	11	12	0	0	0.13	0.11	0	0.09	0.6	0.65	0.95	0.83	0.048	0.624	3.70044	0.00280453	0.0142277	-	-	-	-	-	-	-	-	-
LOC105226546	56	48	31	34	37	19	35	20	37	11	5.73	5.16	3	2.61	3.55	1.26	2.55	1.36	2.32	0.54	4.01	1.606	-1.32013	0.00282696	0.0143076	--	-	-	-	-	-	-	-	-
LOC105233107	42	22	6	47	32	71	68	62	130	200	3.74	2.06	0.51	3.15	2.68	4.1	4.31	3.66	7.12	8.63	2.428	5.564	1.19635	0.00287497	0.0145097	MPV17L	PREDICTED: protein SYM1-like [Bactrocera dorsalis]	Cellular Processes	Transport and catabolism	ko04146//Peroxisome	K13348	-	-	-
LOC105223099	7	6	15	27	9	62	26	37	28	53	0.43	0.39	0.87	1.24	0.52	2.46	1.13	1.5	1.05	1.57	0.69	1.542	1.16013	0.00294445	0.0148094	--	PREDICTED: proprotein convertase subtilisin/kexin type 5 isoform X1 [Bactrocera dorsalis]	-	-	-	-	-	-	-
LOC105222447	37	74	22	136	38	209	120	132	177	275	2.39	5.04	1.35	6.62	2.31	8.76	5.53	5.66	7.04	8.61	3.542	7.12	1.00731	0.00305624	0.0152864	-	-	-	-	-	-	-	-	-
LOC105226916	3	4	4	12	8	4	0	0	1	0	0.25	0.35	0.31	0.74	0.62	0.21	0	0	0.05	0	0.454	0.052	-3.12611	0.00312576	0.0155942	--	CG3831-PA [Drosophila melanogaster]	-	-	-	-	-	-	-
LOC105232268	28	0	9	0	10	0	0	2	0	0	1.53	0	0.47	0	0.51	0	0	0.07	0	0	0.502	0.014	-5.16419	0.00339491	0.0167399	Tret1	PREDICTED: LOW QUALITY PROTEIN: facilitated trehalose transporter Tret1 [Bactrocera dorsalis]	-	-	-	-	GO:0031224//intrinsic component of membrane	GO:0005215//transporter activity	GO:0044763//single-organism cellular process
LOC105222594	7	11	25	25	11	37	38	45	74	43	0.44	0.72	1.48	1.17	0.65	1.5	1.69	1.86	2.84	1.3	0.892	1.838	1.04302	0.00341589	0.016834	Glra2	PREDICTED: glycine receptor subunit alpha-2 [Bactrocera oleae]	-	-	-	-	GO:0031224//intrinsic component of membrane	-	GO:0006811//ion transport
LOC105230412	11	6	24	11	20	80	49	51	40	27	0.53	0.31	1.1	0.4	0.91	2.51	1.69	1.64	1.19	0.63	0.65	1.532	1.2369	0.00344506	0.0169422	Gld	PREDICTED: glucose dehydrogenase [FAD, quinone]-like [Bactrocera dorsalis]	-	-	-	-	-	-	-
LOC105225926	7	2	10	12	10	47	19	30	18	29	0.41	0.12	0.56	0.53	0.55	1.79	0.8	1.17	0.65	0.83	0.434	1.048	1.27187	0.00353722	0.0173445	Lk	PREDICTED: leucokinin [Bactrocera dorsalis]	-	-	-	-	-	-	-
LOC105233462	0	0	1	3	0	9	6	9	6	9	0	0	0.05	0.11	0	0.28	0.16	0.23	0.18	0.19	0.032	0.208	2.70044	0.00355671	0.0174328	Gld	PREDICTED: glucose dehydrogenase [FAD, quinone] [Bactrocera dorsalis]	-	-	-	-	-	GO:0000166//nucleotide binding;GO:0016614//oxidoreductase activity, acting on CH-OH group of donors	GO:0008202//steroid metabolic process
LOC109580017	0	0	0	1	0	6	5	3	4	5	0	0	0	0.03	0	0.14	0.13	0.07	0.09	0.09	0.006	0.104	4.11548	0.00356574	0.017464	--	Retrotransposable element Tf2 155 kDa protein type 1 [Ceratitis capitata]	-	-	-	-	-	-	-
LOC105233570	10	11	18	3	10	46	27	51	58	21	1.37	1.59	2.34	0.31	1.29	4.09	2.64	4.64	4.89	1.4	1.38	3.532	1.35582	0.00383228	0.0186063	--	PREDICTED: uncharacterized protein LOC105233570 [Bactrocera dorsalis]	-	-	-	-	-	-	-
LOC105230984	18	41	23	19	31	92	155	33	47	145	1.19	2.85	1.44	0.94	1.93	3.94	7.3	1.45	1.91	4.64	1.67	3.848	1.20426	0.00395545	0.0190763	--	PREDICTED: uncharacterized protein LOC105230984 [Bactrocera dorsalis]	-	-	-	-	-	-	-
LOC105233612	7	6	20	6	9	43	28	44	13	58	0.33	0.29	0.88	0.21	0.39	1.3	0.93	1.36	0.37	1.31	0.42	1.054	1.32741	0.00403875	0.0193824	CarT	PREDICTED: LOW QUALITY PROTEIN: carcinine transporter [Bactrocera dorsalis]	-	-	-	-	GO:0031224//intrinsic component of membrane	GO:0005215//transporter activity	GO:0030154//cell differentiation
LOC105223479	24	119	61	33	37	158	167	138	176	266	1.01	5.25	2.42	1.04	1.46	4.3	4.99	3.84	4.54	5.4	2.236	4.614	1.0451	0.00409346	0.0196208	--	MAM domain-containing glycosylphosphatidylinositol anchor protein 1 [Bactrocera dorsalis]	-	-	-	-	-	GO:0001871//pattern binding	GO:0002376//immune system process;GO:0006897//endocytosis
LOC105225196	12	7	6	11	11	13	27	35	28	52	1.06	0.65	0.5	0.73	0.91	0.74	1.69	2.04	1.51	2.21	0.77	1.638	1.08901	0.00433216	0.0205883	TRYP1	Kallikrein-14 [Bactrocera dorsalis]	-	-	-	-	-	GO:0004175//endopeptidase activity	GO:0019538//protein metabolic process
LOC105225174	0	37	6	4	2	0	1	1	3	0	0	5.12	0.75	0.4	0.25	0	0.09	0.09	0.24	0	1.304	0.084	-3.95641	0.00435228	0.0206672	Prss1	Trypsin II-P29, partial [Bactrocera dorsalis]	Human Diseases;Organismal Systems;Environmental Information Processing;Organismal Systems	Infectious diseases;Digestive system;Signaling molecules and interaction;Digestive system	ko05164//Influenza A;ko04972//Pancreatic secretion;ko04080//Neuroactive ligand-receptor interaction;ko04974//Protein digestion and absorption	K01312;K01312;K01312;K01312	-	-	-
LOC105227109	12	6	3	10	5	0	1	1	1	7	0.5	0.26	0.12	0.31	0.2	0	0.03	0.03	0.03	0.14	0.278	0.046	-2.59538	0.00438211	0.020792	--	PREDICTED: bromodomain-containing protein 4 [Bactrocera cucurbitae]	-	-	-	-	-	-	-
LOC105222477	73	53	19	52	64	4	17	48	32	30	6.96	5.31	1.71	3.73	5.73	0.25	1.15	3.03	1.87	1.38	4.688	1.536	-1.60979	0.00452592	0.0213362	--	GL24693 [Drosophila persimilis]	-	-	-	-	-	-	-
LOC105222909	2	8	0	7	3	22	9	17	14	44	0.21	0.85	0	0.54	0.28	1.42	0.65	1.14	0.84	2.15	0.376	1.24	1.72154	0.00466024	0.021913	Gnaq	PREDICTED: guanine nucleotide-binding protein subunit alpha-11-like [Bactrocera dorsalis]	Human Diseases;Human Diseases;Human Diseases;Organismal Systems;Organismal Systems;Human Diseases;Environmental Information Processing;Organismal Systems;Environmental Information Processing;Environmental Information Processing;Organismal Systems;Human Diseases;Environmental Information Processing;Organismal Systems;Organismal Systems;Organismal Systems;Organismal Systems;Organismal Systems;Organ…	Cancers;Neurodegenerative diseases;Neurodegenerative diseases;Digestive system;Nervous system;Infectious diseases;Signal transduction;Endocrine system;Signal transduction;Signal transduction;Nervous system;Endocrine and metabolic diseases;Signal transduction;Circulatory system;Circulatory system;Digestive system;Endocrine system;Endocrine system;Endocrine system;Cellular community - eukaryotes;Si…	ko05200//Pathways in cancer;ko05016//Huntington disease;ko05010//Alzheimer disease;ko04972//Pancreatic secretion;ko04723//Retrograde endocannabinoid signaling;ko05163//Human cytomegalovirus infection;ko04015//Rap1 signaling pathway;ko04921//Oxytocin signaling pathway;ko04071//Sphingolipid signaling pathway;ko04020//Calcium signaling pathway;ko04728//Dopaminergic synapse;ko04934//Cushing syndrome;…	K04634;K04634;K04634;K04634;K04634;K04634;K04634;K04634;K04634;K04634;K04634;K04634;K04634;K04634;K04634;K04634;K04634;K04634;K04634;K04634;K04634;K04634;K04634;K04634;K04634;K04634;K04634;K04634;K04634;K04634;K04634;K04634;K04634;K04634;K04634;K04634;K04634;K04634;K04634;K04634;K04634;K04634	-	GO:0005488//binding	-
MSTRG.7033	0	0	0	0	0	3	4	6	1	7	0	0	0	0	0	0.67	0.98	1.37	0.21	1.16	0.001	0.878	9.77808	0.00469595	0.0220403	--	-	-	-	-	-	-	-	-
MSTRG.835	0	0	0	0	1	5	3	3	6	5	0	0	0	0	0.15	0.51	0.34	0.32	0.58	0.38	0.03	0.426	3.82782	0.00477363	0.0223691	--	-	-	-	-	-	-	-	-
LOC105224330	2	3	53	13	6	6	0	4	2	5	0.18	0.28	4.46	0.87	0.5	0.35	0	0.24	0.11	0.22	1.258	0.184	-2.77335	0.00480585	0.0224931	TM_0325	PREDICTED: 3-oxoacyl-[acyl-carrier-protein] reductase FabG-like [Bactrocera oleae]	-	-	-	-	-	-	-
LOC105230834	4	6	28	16	11	4	4	6	3	11	0.13	0.2	0.86	0.39	0.33	0.08	0.09	0.13	0.06	0.17	0.382	0.106	-1.84951	0.00500777	0.0233265	Cyp313a4	PREDICTED: probable cytochrome P450 313a4 [Bactrocera dorsalis]	-	-	-	-	-	-	-
LOC105230836	4	4	54	29	44	0	0	0	1	21	0.23	0.24	2.9	1.24	2.35	0	0	0	0.03	0.58	1.392	0.122	-3.51221	0.00506598	0.0235561	-	-	-	-	-	-	-	-	-
LOC105230186	0	0	0	3	1	43	6	4	9	1	0	0	0	0.08	0.03	0.93	0.15	0.09	0.19	0.02	0.022	0.276	3.64909	0.00511666	0.0237301	--	PREDICTED: uncharacterized protein LOC105230186 isoform X1 [Bactrocera dorsalis]	-	-	-	-	-	-	-
LOC105226334	1	2	1	11	6	1	0	0	0	1	0.05	0.1	0.05	0.4	0.27	0.03	0	0	0	0.02	0.174	0.01	-4.12102	0.00520268	0.0240637	--	GH19923 [Drosophila grimshawi]	-	-	-	-	GO:0044421//extracellular region part	-	GO:0000003//reproduction
LOC105228868	5	2	1	6	1	0	0	1	0	0	0.62	0.26	0.12	0.56	0.12	0	0	0.08	0	0	0.336	0.016	-4.39232	0.00523032	0.0241331	Ilp7	PREDICTED: probable insulin-like peptide 7 [Bactrocera dorsalis]	Organismal Systems	Aging	ko04213//Longevity regulating pathway - multiple species	K19805	-	-	-
LOC105224355	20	27	30	44	34	17	19	16	17	50	0.55	0.84	0.78	0.94	0.93	0.3	0.37	0.29	0.29	0.68	0.808	0.386	-1.06575	0.00534956	0.0246059	--	PREDICTED: AF4/FMR2 family member 4 isoform X1 [Bactrocera dorsalis]	-	-	-	-	-	-	-
LOC105232172	37	51	42	42	36	20	54	11	23	16	0.55	0.81	0.54	0.48	0.49	0.19	0.57	0.1	0.19	0.1	0.574	0.23	-1.31942	0.00538345	0.0247423	--	PREDICTED: mucin-6 isoform X1 [Bactrocera latifrons]	-	-	-	-	-	GO:0043169//cation binding	-
LOC105231184	84	0	70	0	6	1	1	0	2	6	7.43	0	5.86	0	0.5	0.06	0.06	0	0.11	0.26	2.758	0.098	-4.8147	0.00546952	0.0250692	Uro	PREDICTED: uricase [Bactrocera dorsalis]	Metabolism;Metabolism;Metabolism	Global and overview maps;Nucleotide metabolism;Biosynthesis of other secondary metabolites	ko01100//Metabolic pathways;ko00230//Purine metabolism;ko00232//Caffeine metabolism	K00365;K00365;K00365	GO:0042579//microbody	GO:0016663//oxidoreductase activity, acting on other nitrogenous compounds as donors, oxygen as acceptor	GO:0009112//nucleobase metabolic process;GO:0044282//small molecule catabolic process
LOC105233494	12	62	370	180	220	1	15	17	10	134	0.73	3.99	21.43	8.28	12.65	0.04	0.65	0.69	0.38	3.97	9.416	1.146	-3.03851	0.00554338	0.0252945	--	PREDICTED: uncharacterized protein LOC105233494 [Bactrocera dorsalis]	-	-	-	-	-	-	-
LOC105225032	23	35	10	35	23	27	15	7	9	17	1.69	2.71	0.7	1.94	1.59	1.29	0.79	0.34	0.41	0.61	1.726	0.688	-1.32695	0.00566205	0.0257603	--	GL16065 [Drosophila persimilis]	-	-	-	-	-	-	-
LOC105226809	1	1	3	9	2	1	0	0	0	0	0.03	0.03	0.09	0.22	0.06	0.02	0	0	0	0	0.086	0.004	-4.42626	0.00570978	0.0259674	--	PREDICTED: chromodomain-helicase-DNA-binding protein 1 [Ceratitis capitata]	-	-	-	-	-	-	-
LOC105225098	13	8	17	20	16	13	9	3	6	14	0.2	0.13	0.25	0.23	0.23	0.13	0.1	0.03	0.06	0.1	0.208	0.084	-1.30812	0.00576738	0.0261888	ROBO2	PREDICTED: protogenin isoform X1 [Bactrocera dorsalis]	-	-	-	-	-	-	-
LOC105231777	3	8	22	1	1	3	0	1	0	0	0.93	2.6	6.43	0.23	0.29	0.6	0	0.2	0	0	2.096	0.16	-3.71149	0.00602154	0.0271536	CEC1	PREDICTED: cecropin-1 [Bactrocera dorsalis]	Organismal Systems	Immune system	ko04624//Toll and Imd signaling pathway	K20696	-	-	GO:0006952//defense response;GO:0009617//response to bacterium
LOC105231484	7	4	10	11	3	2	5	1	0	3	0.63	0.4	0.89	0.78	0.17	0.1	0.33	0.06	0	0.14	0.574	0.126	-2.18763	0.00614966	0.0276483	Or22b	PREDICTED: odorant receptor 30a-like [Bactrocera dorsalis]	-	-	-	-	-	-	-
LOC105232778	0	1	0	0	0	7	1	3	5	8	0	0.07	0	0	0	0.3	0.05	0.13	0.2	0.25	0.014	0.186	3.7318	0.0062238	0.0279191	--	PREDICTED: extensin [Bactrocera dorsalis]	-	-	-	-	-	-	-
LOC105228937	259	130	220	92	339	1098	1070	163	876	1028	6.38	3.37	5.13	1.71	7.85	17.54	18.78	2.66	13.27	12.26	4.888	12.902	1.40028	0.00650927	0.0289743	--	PREDICTED: nose resistant to fluoxetine protein 6 [Bactrocera dorsalis]	-	-	-	-	-	-	-
LOC105223594	2	0	0	0	1	9	11	7	7	2	0.28	0	0	0	0.13	0.82	1.1	0.65	0.6	0.14	0.082	0.662	3.01314	0.00663823	0.0294774	--	PREDICTED: uncharacterized protein LOC105223594 [Bactrocera dorsalis]	-	-	-	-	-	-	-
LOC105226233	9	0	15	0	2	0	0	0	0	0	0.5	0	0.8	0	0.11	0	0	0	0	0	0.282	0.001	-8.13955	0.00697356	0.0307492	Slc17a5	PREDICTED: sialin-like [Rhagoletis zephyria]	-	-	-	-	-	-	-
LOC105231467	0	3	0	3	8	17	13	12	10	24	0	0.08	0	0.06	0.2	0.29	0.25	0.21	0.16	0.31	0.068	0.244	1.84327	0.00697714	0.0307534	-	-	-	-	-	-	-	-	-
LOC105228214	26	14	18	20	17	23	7	8	2	3	2.78	1.57	1.82	1.61	1.71	1.59	0.53	0.57	0.13	0.16	1.898	0.596	-1.6711	0.00701742	0.0308961	Cyp4d10	PREDICTED: cytochrome P450 4d10-like [Bactrocera dorsalis]	-	-	-	-	-	GO:0016491//oxidoreductase activity;GO:0046906//tetrapyrrole binding	GO:0044710//single-organism metabolic process
LOC105233065	1	1	0	4	2	27	3	4	30	4	0.01	0.01	0	0.02	0.02	0.14	0.02	0.02	0.15	0.02	0.012	0.07	2.54432	0.00729788	0.0318797	cac	PREDICTED: voltage-dependent calcium channel type A subunit alpha-1 [Bactrocera dorsalis]	-	-	-	-	-	-	-
LOC105223917	5	1	0	10	12	1	0	0	0	2	0.3	0.06	0	0.45	0.68	0.04	0	0	0	0.06	0.298	0.02	-3.89724	0.00753909	0.0328111	Amnionless	PREDICTED: protein amnionless [Bactrocera dorsalis]	-	-	-	-	-	-	-
LOC105233615	0	0	0	2	0	5	6	4	4	8	0	0	0	0.11	0	0.23	0.3	0.19	0.17	0.27	0.022	0.232	3.39855	0.00759747	0.033004	--	PREDICTED: transcriptional regulator of filamentous growth FLO8-like [Bactrocera latifrons]	-	-	-	-	-	-	-
LOC105222792	10	6	13	22	13	9	8	5	4	12	0.72	0.46	0.89	1.2	0.88	0.42	0.41	0.24	0.18	0.42	0.83	0.334	-1.31326	0.00765305	0.0331717	--	PREDICTED: extensin-2 isoform X1 [Bactrocera cucurbitae]	-	-	-	-	-	-	-
LOC105234132	10	24	24	15	21	22	8	11	7	8	0.29	0.72	0.65	0.32	0.56	0.41	0.16	0.21	0.12	0.11	0.508	0.202	-1.33047	0.0078693	0.034021	--	GH10857 [Drosophila grimshawi]	-	-	-	-	-	-	-
LOC105225181	1	1	0	1	0	13	9	5	7	1	0.09	0.1	0	0.07	0	0.78	0.59	0.31	0.4	0.04	0.052	0.424	3.02748	0.00809575	0.0348331	PGLP2	PREDICTED: 4-nitrophenylphosphatase [Bactrocera dorsalis]	Metabolism	Metabolism of terpenoids and polyketides	ko00981//Insect hormone biosynthesis	K21013	-	-	-
LOC105230350	5	4	3	15	13	45	21	20	15	37	0.11	0.09	0.06	0.24	0.26	0.58	0.32	0.28	0.2	0.38	0.152	0.352	1.2115	0.00827019	0.0354406	SHF	PREDICTED: uncharacterized protein LOC105230350 isoform X1 [Bactrocera dorsalis]	-	-	-	-	-	-	-
LOC105225427	1	0	0	0	0	0	5	0	43	8	0.12	0	0	0	0	0	0.42	0	3.15	0.46	0.024	0.806	5.06967	0.0083769	0.0358063	--	GM15537 [Drosophila sechellia]	-	-	-	-	-	-	-
LOC105224331	7	3	3	9	1	1	1	1	2	0	0.83	0.37	0.34	0.8	0.11	0.08	0.08	0.08	0.15	0	0.49	0.078	-2.65124	0.00869238	0.0369318	TM_0325	PREDICTED: L-xylulose reductase-like [Bactrocera cucurbitae]	-	-	-	-	-	-	-
LOC105234046	2	4	3	4	1	7	6	13	21	17	0.14	0.29	0.2	0.21	0.07	0.31	0.29	0.59	0.89	0.57	0.182	0.53	1.54205	0.00880441	0.0373209	--	GM17948 [Drosophila sechellia]	-	-	-	-	-	GO:0016740//transferase activity	GO:0006796//phosphate-containing compound metabolic process
LOC105224857	2	28	10	9	7	45	34	28	56	50	0.12	1.78	0.57	0.41	0.4	1.77	1.47	1.12	2.08	1.47	0.656	1.582	1.26998	0.00902191	0.0381326	mth2	PREDICTED: G-protein coupled receptor Mth2 [Bactrocera dorsalis]	-	-	-	-	-	-	-
MSTRG.15476	4	1	1	3	3	4	8	18	23	10	0.75	0.2	0.18	0.43	0.53	0.49	1.07	2.25	2.67	0.91	0.418	1.478	1.82207	0.00919981	0.0387171	--	-	-	-	-	-	-	-	-
LOC105226504	20	58	35	93	84	53	44	33	29	52	0.74	2.24	1.22	2.57	2.9	1.26	1.16	0.8	0.66	0.93	1.934	0.962	-1.00748	0.00947907	0.0395659	Claspin	PREDICTED: claspin isoform X1 [Bactrocera dorsalis]	-	-	-	-	-	-	-
LOC105231823	1	0	0	0	1	8	1	2	4	19	0.13	0	0	0	0.12	0.66	0.09	0.17	0.31	1.16	0.05	0.478	3.25701	0.00980061	0.0405911	-	-	-	-	-	-	-	-	-
LOC105225339	0	0	2	2	1	14	6	10	1	11	0	0	0.06	0.05	0.03	0.29	0.14	0.22	0.02	0.14	0.028	0.162	2.5325	0.0101064	0.0416654	--	PREDICTED: period circadian protein-like, partial [Rhagoletis zephyria]	-	-	-	-	-	-	-
LOC115066528	0	0	0	0	0	12	2	2	2	2	0	0	0	0	0	2.09	0.38	0.36	0.33	0.26	0.001	0.684	9.41785	0.0101235	0.0416918	TNR	Ficolin-1 [Bactrocera dorsalis]	Human Diseases;Environmental Information Processing;Cellular Processes;Human Diseases;Environmental Information Processing	Infectious diseases;Signal transduction;Cellular community - eukaryotes;Cancers;Signaling molecules and interaction	ko05165//Human papillomavirus infection;ko04151//PI3K-Akt signaling pathway;ko04510//Focal adhesion;ko05206//MicroRNAs in cancer;ko04512//ECM-receptor interaction	K06252;K06252;K06252;K06252;K06252	-	-	-
LOC115065719	8	7	4	7	4	18	18	12	19	26	1.01	0.93	0.48	0.66	0.47	1.47	1.61	1	1.47	1.58	0.71	1.426	1.00608	0.0103476	0.0424213	--	PREDICTED: LOW QUALITY PROTEIN: TNF receptor-associated factor 4 [Bactrocera dorsalis]	-	-	-	-	-	-	-
LOC105222048	2	2	3	3	2	16	12	7	14	5	0.25	0.27	0.36	0.29	0.24	1.31	1.08	0.59	1.09	0.31	0.282	0.876	1.63524	0.0108187	0.0440751	--	GM17265 [Drosophila sechellia]	-	-	-	-	-	-	-
LOC105231778	5	6	22	0	0	2	0	0	0	0	1.23	1.7	5.12	0	0	0.32	0	0	0	0	1.61	0.064	-4.65284	0.0108418	0.0441539	CEC2	PREDICTED: cecropin-1-like isoform X3 [Bactrocera dorsalis]	Organismal Systems	Immune system	ko04624//Toll and Imd signaling pathway	K20696	-	-	GO:0006952//defense response;GO:0009617//response to bacterium
LOC105233636	19	6	39	15	12	6	10	10	13	13	2.62	0.86	5.01	1.53	1.53	0.53	0.96	0.9	1.08	0.84	2.31	0.862	-1.42213	0.0111188	0.0451099	Tnr	PREDICTED: ficolin-1-like, partial [Bactrocera dorsalis]	-	-	-	-	-	-	-
LOC109579493	24	17	26	25	10	18	12	18	10	16	4.26	3.17	4.36	3.33	1.67	2.07	1.52	2.12	1.09	1.37	3.358	1.634	-1.03919	0.0111478	0.0452119	-	-	-	-	-	-	-	-	-
LOC105226693	294	591	338	1021	561	771	122	109	120	215	8.77	18.54	9.54	22.9	15.72	14.9	2.59	2.16	2.2	3.1	15.094	4.99	-1.59686	0.0113521	0.045866	far1	CG5065, isoform A [Drosophila melanogaster]	Cellular Processes;Organismal Systems;Metabolism	Transport and catabolism;Aging;Lipid metabolism	ko04146//Peroxisome;ko04212//Longevity regulating pathway - worm;ko00073//Cutin, suberine and wax biosynthesis	K13356;K13356;K13356	GO:0044439//peroxisomal part	GO:0016620//oxidoreductase activity, acting on the aldehyde or oxo group of donors, NAD or NADP as acceptor	GO:0046485//ether lipid metabolic process
LOC109579336	8	11	17	13	10	7	7	3	5	15	1.38	1.99	2.77	1.69	1.62	0.78	0.86	0.34	0.53	1.25	1.89	0.752	-1.32958	0.0114848	0.0462109	-	-	-	-	-	-	-	-	-
LOC105222524	3	6	8	4	4	3	3	0	1	1	0.22	0.47	0.56	0.22	0.28	0.14	0.16	0	0.05	0.04	0.35	0.078	-2.16581	0.0115162	0.0462801	--	PREDICTED: mediator of RNA polymerase II transcription subunit 13 [Bactrocera dorsalis]	-	-	-	-	-	-	-
LOC105222797	5	11	23	33	23	14	15	7	3	11	0.18	0.39	0.72	0.84	0.72	0.31	0.36	0.16	0.07	0.17	0.57	0.214	-1.41335	0.0117864	0.0471819	--	PREDICTED: probable kinetochore protein NDC80 [Bactrocera dorsalis]	-	-	-	-	-	-	GO:1902589//single-organism organelle organization;GO:1903047//mitotic cell cycle process
LOC105232646	19	20	22	31	93	271	74	63	89	129	0.93	1.03	1.02	1.14	4.28	8.61	2.58	2.05	2.68	3.06	1.68	3.796	1.17602	0.0119297	0.0476638	ADA2	PREDICTED: adenosine deaminase CECR1-A [Bactrocera dorsalis]	Metabolism;Metabolism	Global and overview maps;Nucleotide metabolism	ko01100//Metabolic pathways;ko00230//Purine metabolism	K19572;K19572	GO:0044421//extracellular region part	GO:0003824//catalytic activity;GO:0005102//receptor binding	GO:0009267//cellular response to starvation;GO:0035166//post-embryonic hemopoiesis;GO:0046085//adenosine metabolic process;GO:0080090//regulation of primary metabolic process
LOC105232836	21	56	48	22	25	31	29	21	21	18	1.91	5.36	4.13	1.51	2.14	1.83	1.88	1.27	1.17	0.79	3.01	1.388	-1.11676	0.0125783	0.0498414	-	-	-	-	-	-	-	-	-

## Sheet: Glucose vs Glucose+YH
id	Glucose-1_count	Glucose-2_count	Glucose-3_count	Glucose-4_count	Glucose-5_count	Glucose-yeast-1_count	Glucose-yeast-2_count	Glucose-yeast-3_count	Glucose-yeast-4_count	Glucose-yeast-5_count	Glucose-1_fpkm	Glucose-2_fpkm	Glucose-3_fpkm	Glucose-4_fpkm	Glucose-5_fpkm	Glucose-yeast-1_fpkm	Glucose-yeast-2_fpkm	Glucose-yeast-3_fpkm	Glucose-yeast-4_fpkm	Glucose-yeast-5_fpkm	Glucose_mean	Glucose-yeast_mean	log2(fc)	PValue	FDR	Symbol	Description	KEGG_A_class	KEGG_B_class	Pathway	K_ID	GO Component	GO Function	GO Process
LOC105222454	5060	5499	5382	4838	6085	152	106	100	133	114	195.16	212.61	263.4	226.53	257.1	5.48	3.48	4.21	5.4	4.38	230.96	4.59	-5.65301	0	0	Ccp84Ab	PREDICTED: cuticle protein 7 [Bactrocera dorsalis]	-	-	-	-	-	-	-
LOC105231177	59058	62382	49668	53395	68554	1208	845	1042	969	914	3713.82	3932.34	3963.13	4076.23	4722.54	71.01	45.29	71.6	64.13	57.27	4081.61	61.86	-6.04399	0	0	Acp1	PREDICTED: adult cuticle protein 1-like [Bactrocera dorsalis]	-	-	-	-	-	-	-
LOC105231178	4392	4750	3817	3786	5177	18	17	19	26	24	204.39	221.58	225.39	213.89	263.92	0.78	0.67	0.97	1.27	1.11	225.834	0.96	-7.87801	0	0	Acp1	PREDICTED: adult cuticle protein 1-like [Bactrocera dorsalis]	-	-	-	-	-	-	-
LOC105231180	7031	8042	7683	7606	8570	49	34	36	34	36	509.86	584.58	706.94	669.58	680.79	3.32	2.1	2.85	2.59	2.6	630.35	2.692	-7.87133	0	0	Acp1	PREDICTED: adult cuticle protein 1-like [Bactrocera dorsalis]	-	-	-	-	-	-	-
LOC105232279	3005	3294	3077	2965	3670	38	61	54	59	58	78.16	85.88	101.55	93.62	104.57	0.92	1.35	1.53	1.62	1.5	92.756	1.384	-6.06652	0	0	--	PREDICTED: tetra-peptide repeat homeobox protein 1 [Bactrocera dorsalis]	-	-	-	-	-	-	-
LOC105233805	118	129	90	87	95	14547	20093	21567	15700	14470	9.37	10.27	9.07	8.38	8.26	1079.55	1359.45	1870.78	1311.82	1144.7	9.07	1353.26	7.22112	0	0	--	PREDICTED: uncharacterized protein LOC105233805 [Bactrocera dorsalis]	-	-	-	-	-	-	-
LOC105229941	2691	2745	2140	2565	2996	13	5	12	17	11	173.74	177.65	175.31	201.04	211.89	0.78	0.28	0.85	1.16	0.71	187.926	0.756	-7.95756	1.71054e-307	3.05038e-304	--	PREDICTED: cuticle protein 1 [Bactrocera dorsalis]	-	-	-	-	-	-	-
LOC105233903	3850	4198	3640	3667	5024	127	71	114	107	102	211.38	231.05	253.59	244.42	302.18	6.52	3.32	6.84	6.18	5.58	248.524	5.688	-5.44932	1.15736e-262	1.80591e-259	--	PREDICTED: DNA-directed RNA polymerase II subunit RPB1 [Bactrocera dorsalis]	-	-	-	-	-	GO:0005214//structural constituent of chitin-based cuticle	GO:0042335//cuticle development
LOC105231383	1376	1596	1431	1294	1655	34	34	9	21	19	25.4	29.54	33.52	29	33.47	0.59	0.53	0.18	0.41	0.35	30.186	0.412	-6.19509	1.2659e-255	1.7558e-252	-	-	-	-	-	-	-	-	-
LOC105234185	1766	2098	1705	1741	2542	57	39	45	51	55	81.31	96.83	99.61	97.32	128.22	2.45	1.53	2.26	2.47	2.52	100.658	2.246	-5.48596	2.41607e-254	3.01597e-251	--	PREDICTED: early nodulin-75 [Bactrocera dorsalis]	-	-	-	-	-	-	-
LOC105231181	13601	14144	11665	12732	15923	201	171	326	219	234	1258.7	1312.12	1369.8	1430.43	1614.28	17.39	13.49	32.96	21.33	21.58	1397.07	21.35	-6.03202	1.99875e-246	2.26822e-243	Acp1	PREDICTED: adult cuticle protein 1 [Bactrocera dorsalis]	-	-	-	-	-	-	-
LOC105234186	913	1002	852	694	1026	35	38	40	44	37	39.09	43.01	46.29	36.07	48.12	1.4	1.39	1.87	1.98	1.58	42.516	1.644	-4.69272	1.34523e-229	1.39938e-226	--	PREDICTED: tyrosine-protein phosphatase non-receptor type 23 [Bactrocera dorsalis]	-	-	-	-	-	-	-
LOC105232280	2135	2555	2327	2476	2802	24	57	57	50	52	60.97	73.19	84.52	85.93	87.65	0.66	1.39	1.78	1.5	1.48	78.452	1.362	-5.84801	1.06645e-209	9.50896e-207	--	PREDICTED: proline-rich protein 4 [Bactrocera dorsalis]	-	-	-	-	-	-	-
LOC105225316	1762	1809	1238	1428	1881	166	177	194	160	194	100.28	103.21	89.4	98.66	117.27	8.83	8.59	12.06	9.58	11	101.764	10.012	-3.34543	1.05072e-189	8.7441e-187	--	Peritrophin-1 [Ceratitis capitata]	-	-	-	-	-	GO:0097367//carbohydrate derivative binding	GO:0006022//aminoglycan metabolic process
LOC105222387	1244	1751	1173	1070	1599	60	83	55	67	88	53.05	74.86	63.48	55.4	74.7	2.39	3.02	2.56	3.01	3.74	64.298	2.944	-4.44892	8.63371e-188	6.73591e-185	--	AGAP010196-PA-like protein [Anopheles sinensis]	-	-	-	-	-	-	-
LOC105228262	1199	1057	820	1000	960	5801	6840	4445	5447	6104	20.15	18.13	17.72	20.58	17.98	92.51	99.41	82.84	97.69	103.64	18.912	95.218	2.33193	5.39624e-186	3.96242e-183	ADAMTS12	PREDICTED: A disintegrin and metalloproteinase with thrombospondin motifs 12 isoform X1 [Bactrocera dorsalis]	-	-	-	-	GO:0031012//extracellular matrix	GO:0016787//hydrolase activity	-
LOC105234027	767	784	717	641	838	73	78	87	67	64	27.06	27.73	32.1	27.45	32.39	2.41	2.35	3.35	2.49	2.25	29.346	2.57	-3.51332	6.6655e-185	4.62253e-182	TFPI2	PREDICTED: probable serine/threonine-protein kinase clkA [Bactrocera dorsalis]	-	-	-	-	GO:0043229//intracellular organelle	GO:0004866//endopeptidase inhibitor activity;GO:0008200//ion channel inhibitor activity	GO:0010466//negative regulation of peptidase activity
LOC105222552	1341	1813	1885	1780	2410	25	43	30	27	30	22.8	30.91	40.68	36.75	44.9	0.4	0.62	0.56	0.48	0.51	35.208	0.514	-6.09799	2.46254e-183	1.61789e-180	--	PREDICTED: mucin-5AC [Bactrocera dorsalis]	-	-	-	-	-	-	-
MSTRG.2081	10865	12264	7076	10882	12056	1216	1092	1106	1089	1156	1448.74	1639.24	1197.21	1761.51	1761.02	151.57	124.09	161.14	152.83	153.6	1561.54	148.646	-3.39302	7.31135e-181	4.56338e-178	--	-	-	-	-	-	-	-	-
LOC105232494	527	588	456	458	584	32	32	25	38	25	38.86	43.47	42.67	41	47.18	2.21	2.01	2.01	2.95	1.84	42.636	2.204	-4.27388	2.41001e-180	1.43258e-177	--	PREDICTED: general odorant-binding protein 99a [Bactrocera dorsalis]	-	-	-	-	-	-	-
LOC105233804	518	622	442	414	585	5690	7736	7798	5843	6139	35.37	42.57	38.29	34.31	43.75	363.14	450.12	581.71	419.85	417.65	38.858	446.494	3.52236	2.7991e-171	1.58823e-168	--	PREDICTED: uncharacterized protein LOC105233804 [Bactrocera dorsalis]	-	-	-	-	-	-	-
LOC105226224	768	913	700	742	973	96	92	78	94	84	7.17	8.51	8.27	8.38	9.91	0.83	0.73	0.79	0.92	0.78	8.448	0.81	-3.38262	8.98022e-170	4.87392e-167	--	PREDICTED: proteoglycan 4 [Bactrocera dorsalis]	-	-	-	-	-	-	-
LOC105224719	2178	2405	1719	2116	2991	112	66	105	99	77	73.05	80.86	73.16	86.16	109.9	3.51	1.89	3.85	3.49	2.57	84.626	3.062	-4.78855	2.64332e-158	1.37486e-155	--	PREDICTED: glycine-rich cell wall structural protein-like, partial [Bactrocera dorsalis]	-	-	-	-	-	-	-
LOC105224985	319	272	197	287	317	2487	2764	1906	2353	2822	14.26	12.19	11.17	15.57	15.52	103.9	105.27	93.07	110.67	125.67	13.742	107.716	2.97057	2.85647e-147	1.42629e-144	--	PREDICTED: pro-resilin-like [Bactrocera oleae]	-	-	-	-	-	-	-
LOC105224380	847	770	580	640	866	46	59	44	69	72	24.29	22.14	21.11	22.28	27.21	1.23	1.44	1.38	2.08	2.06	23.406	1.638	-3.83687	2.20384e-145	1.0581e-142	--	PREDICTED: O-acyltransferase like protein [Bactrocera dorsalis]	-	-	-	-	-	-	-
LOC105222583	886	875	631	724	797	219	192	156	163	146	19.77	19.83	17.97	21.02	20.68	4.65	4.09	3.73	3.87	3.04	19.854	3.876	-2.35679	1.17181e-141	5.41766e-139	thbs3a	PREDICTED: cartilage oligomeric matrix protein isoform X1 [Bactrocera dorsalis]	Human Diseases;Environmental Information Processing;Cellular Processes;Cellular Processes;Environmental Information Processing;Human Diseases	Infectious diseases;Signal transduction;Cellular community - eukaryotes;Transport and catabolism;Signaling molecules and interaction;Infectious diseases	ko05165//Human papillomavirus infection;ko04151//PI3K-Akt signaling pathway;ko04510//Focal adhesion;ko04145//Phagosome;ko04512//ECM-receptor interaction;ko05144//Malaria	K04659;K04659;K04659;K04659;K04659;K04659	-	-	GO:0022610//biological adhesion
LOC105229866	772	776	522	772	928	38	32	26	40	40	72.68	73.23	62.36	88.23	95.71	3.34	2.57	2.67	3.96	3.75	78.442	3.258	-4.58957	6.59589e-141	2.94059e-138	--	PREDICTED: glycine-rich protein 5-like [Bactrocera dorsalis]	-	-	-	-	-	-	-
LOC105224910	515	653	540	466	692	23	17	13	11	8	25.96	33	34.54	28.52	38.22	1.08	0.73	0.72	0.58	0.4	32.048	0.702	-5.51262	1.37118e-134	5.90224e-132	--	PREDICTED: brain acid soluble protein 1 homolog [Bactrocera dorsalis]	-	-	-	-	-	-	-
LOC105233255	929	1117	732	857	1238	3	4	17	12	7	38.93	46.93	38.93	43.6	56.84	0.12	0.14	0.78	0.53	0.29	45.046	0.372	-6.91995	1.24372e-131	5.17513e-129	--	PREDICTED: pupal cuticle protein [Bactrocera dorsalis]	-	-	-	-	-	-	-
LOC105225353	1080	1257	885	914	1138	3319	3461	3056	2993	3215	37.82	44.61	40	37.77	44.51	104.32	99.24	112.09	105.93	107.31	40.942	105.778	1.36939	1.28605e-125	5.01681e-123	AANAT1	PREDICTED: dopamine N-acetyltransferase isoform X1 [Bactrocera dorsalis]	Metabolism;Metabolism	Global and overview maps;Amino acid metabolism	ko01100//Metabolic pathways;ko00380//Tryptophan metabolism	K00669;K00669	-	-	-
LOC105226562	562	589	415	463	721	12	11	16	11	6	5.12	5.71	5.14	5.51	7.44	0.13	0.09	0.2	0.1	0.06	5.784	0.116	-5.63987	2.12793e-122	8.04937e-120	chs-2	PREDICTED: uncharacterized LOC105226562 isoform X1 [Bactrocera dorsalis]	Metabolism	Carbohydrate metabolism	ko00520//Amino sugar and nucleotide sugar metabolism	K00698	-	GO:0016757//transferase activity, transferring glycosyl groups	-
LOC105223395	1626	1477	1220	1523	1523	5109	5895	4578	4653	4833	71.91	65.73	68.02	82.35	74.09	211.93	224.54	222.76	217.51	215.37	72.42	218.422	1.59266	1.01377e-121	3.72204e-119	Ttpal	PREDICTED: alpha-tocopherol transfer protein-like isoform X1 [Bactrocera dorsalis]	-	-	-	-	GO:0044464//cell part	-	GO:0051234//establishment of localization
LOC105231042	55	102	56	68	43	9129	28871	11207	12950	15524	4.94	9.18	6.38	7.41	4.23	765.88	2208.26	1098.98	1223.24	1388.34	6.428	1336.94	7.70035	4.82641e-118	1.72137e-115	--	PREDICTED: general odorant-binding protein 99a-like [Bactrocera dorsalis]	-	-	-	-	-	-	-
LOC105227241	915	1170	974	928	1297	44	57	56	58	23	26.56	34.04	35.87	32.7	41.24	1.21	1.41	1.78	1.77	0.69	34.082	1.372	-4.63466	3.62596e-117	1.2573e-114	--	GH12870 [Drosophila grimshawi]	-	-	-	-	-	GO:0016787//hydrolase activity;GO:0097367//carbohydrate derivative binding	GO:0006022//aminoglycan metabolic process;GO:0044238//primary metabolic process
LOC105229032	1682	2240	1491	1463	1851	520	461	395	420	461	20.35	27.2	22.9	21.51	24.52	5.95	4.8	5.25	5.42	5.62	23.296	5.408	-2.10692	3.80786e-114	1.28469e-111	FBLN7	PREDICTED: fibrillin-1 isoform X1 [Bactrocera dorsalis]	-	-	-	-	GO:0031012//extracellular matrix	GO:0046872//metal ion binding	-
LOC105233939	695	639	521	595	599	1887	2101	1650	1573	1887	47.1	43.41	44.81	48.96	44.47	119.55	121.36	122.19	112.21	127.44	45.75	120.55	1.39779	6.73539e-112	2.15584e-109	-	-	-	-	-	-	-	-	-
LOC105224810	4006	4150	3060	3492	3643	10004	10387	7661	7997	8745	138.85	144.19	134.58	146.94	138.33	324.14	306.83	290.14	291.74	302.04	140.578	302.978	1.10784	1.02571e-111	3.20099e-109	Idh1	PREDICTED: isocitrate dehydrogenase [NADP] cytoplasmic [Bactrocera dorsalis]	Metabolism;Metabolism;Cellular Processes;Metabolism;Metabolism;Metabolism;Human Diseases;Metabolism	Global and overview maps;Global and overview maps;Transport and catabolism;Metabolism of other amino acids;Global and overview maps;Carbohydrate metabolism;Cancers;Global and overview maps	ko01100//Metabolic pathways;ko01200//Carbon metabolism;ko04146//Peroxisome;ko00480//Glutathione metabolism;ko01230//Biosynthesis of amino acids;ko00020//Citrate cycle (TCA cycle);ko05230//Central carbon metabolism in cancer;ko01210//2-Oxocarboxylic acid metabolism	K00031;K00031;K00031;K00031;K00031;K00031;K00031;K00031	-	-	-
LOC105232493	4219	4937	4134	4519	5338	825	1001	1010	863	947	162.77	190.6	203.09	211.92	225.71	28.93	32.32	41.67	34.25	35.85	198.818	34.604	-2.52244	5.33348e-106	1.62385e-103	--	gasp, isoform A [Drosophila melanogaster]	-	-	-	-	-	GO:0097367//carbohydrate derivative binding	GO:0006022//aminoglycan metabolic process
LOC105226952	1819	1693	1439	1701	1672	678	736	524	572	635	59.68	55.89	60.4	68.16	60.41	21.02	21.49	19.5	20.34	21.82	60.908	20.834	-1.54769	5.80964e-105	1.72671e-102	--	PREDICTED: leucine-rich repeat-containing protein 20 isoform X1 [Bactrocera dorsalis]	-	-	-	-	-	-	-
LOC105230878	737	774	485	540	603	2333	2213	1850	1890	1928	37.36	39.33	31.19	33.23	33.48	110.54	95.6	102.46	100.83	97.38	34.918	101.362	1.53747	2.24101e-99	6.50569e-97	--	PREDICTED: alpha-tocopherol transfer protein-like [Bactrocera dorsalis]	-	-	-	-	GO:0044464//cell part	-	GO:0051234//establishment of localization
LOC105231035	763	781	674	542	604	3228	4381	3956	3246	4145	80.54	82.64	90.27	69.45	69.84	318.5	394.1	456.24	360.61	435.97	78.548	393.084	2.32319	5.68917e-98	1.61404e-95	--	PREDICTED: general odorant-binding protein 99a [Bactrocera dorsalis]	-	-	-	-	-	-	-
LOC105228945	167	174	155	153	188	901	1209	924	843	1171	3.68	3.84	4.33	4.09	4.53	18.53	22.67	22.22	19.53	25.68	4.094	21.726	2.40784	8.81971e-95	2.44659e-92	Sardh	PREDICTED: sarcosine dehydrogenase, mitochondrial [Bactrocera dorsalis]	Metabolism;Metabolism	Global and overview maps;Amino acid metabolism	ko01100//Metabolic pathways;ko00260//Glycine, serine and threonine metabolism	K00314;K00314	-	-	GO:0044710//single-organism metabolic process
LOC105230212	3680	3477	2669	2907	3321	1416	1768	1181	1210	1228	110.9	105.04	102.06	106.36	109.64	39.89	45.41	38.89	38.38	36.88	106.8	39.89	-1.42081	1.00137e-92	2.71742e-90	Cyp6a2	PREDICTED: cytochrome P450 6a2-like [Bactrocera dorsalis]	-	-	-	-	-	-	-
LOC105224023	613	579	472	531	559	1652	1755	1255	1358	1369	21.66	20.46	20.99	22.57	21.34	54.37	52.2	47.79	49.81	47.85	21.404	50.404	1.23566	4.12851e-90	1.09651e-87	CLN3	PREDICTED: battenin-like [Bactrocera dorsalis]	Cellular Processes	Transport and catabolism	ko04142//Lysosome	K12389	GO:0031224//intrinsic component of membrane	-	-
LOC105226854	1419	1601	1128	1281	1643	334	473	266	319	319	31.44	35.56	31.71	34.45	39.88	6.92	8.93	6.44	7.44	7.04	34.608	7.354	-2.2345	1.06556e-89	2.77113e-87	--	PREDICTED: probable serine/threonine-protein kinase nek3 [Bactrocera dorsalis]	-	-	-	-	-	-	-
LOC105230511	46	33	41	35	25	397	346	328	341	338	3.63	2.61	4.11	3.35	2.16	29.28	23.27	28.28	28.32	26.58	3.172	27.146	3.09727	2.92957e-88	7.46323e-86	--	PREDICTED: uncharacterized protein LOC105230511 [Bactrocera dorsalis]	-	-	-	-	-	-	-
LOC115065892	378	621	381	493	606	31	44	31	30	26	5.37	8.84	6.87	8.5	9.43	0.41	0.53	0.48	0.45	0.37	7.802	0.448	-4.12227	3.70744e-88	9.256e-86	--	PREDICTED: LOW QUALITY PROTEIN: uncharacterized threonine-rich GPI-anchored glycoprotein PJ4664.02 [Bactrocera dorsalis]	Metabolism;Metabolism	Global and overview maps;Carbohydrate metabolism	ko01100//Metabolic pathways;ko00520//Amino sugar and nucleotide sugar metabolism	K01183;K01183	-	GO:0016798//hydrolase activity, acting on glycosyl bonds	GO:0006022//aminoglycan metabolic process
LOC105229898	32	30	29	12	33	489	758	783	619	612	1.69	1.33	2.16	1.06	1.61	21.86	33.46	45.34	31.7	32.02	1.57	32.876	4.3882	8.49012e-88	2.07808e-85	CCHa2	PREDICTED: neuropeptide CCHamide-2 isoform X1 [Bactrocera dorsalis]	-	-	-	-	-	-	-
LOC105230010	703	1115	606	483	670	5862	7944	7691	6144	7113	44.64	70.97	48.82	37.23	46.6	347.94	429.88	533.58	410.59	450.05	49.652	434.408	3.12913	9.71589e-87	2.28837e-84	rgn	PREDICTED: regucalcin-like [Bactrocera dorsalis]	-	-	-	-	-	-	-
LOC105232635	32665	32650	24883	30382	26624	94522	105711	74838	78365	81621	1210.81	1212.63	1174.55	1368.42	1081.81	3313.89	3380.54	3071.42	3094.84	3055.12	1209.64	3183.16	1.39588	1.44256e-85	3.33471e-83	Argk	PREDICTED: arginine kinase isoform X1 [Bactrocera dorsalis]	Metabolism;Metabolism	Global and overview maps;Amino acid metabolism	ko01100//Metabolic pathways;ko00330//Arginine and proline metabolism	K00933;K00933	-	GO:0016772//transferase activity, transferring phosphorus-containing groups	-
LOC105231082	76	86	62	66	140	978	1455	1080	1074	1214	2.85	3.23	2.95	3	5.75	34.27	46.48	44.23	42.37	45.35	3.556	42.54	3.58049	1.75626e-83	3.98607e-81	-	-	-	-	-	-	-	-	-
LOC105222881	1153	1014	774	853	846	3058	3782	2713	2714	2619	23.31	20.55	19.85	20.93	18.74	57.79	65.16	59.93	57.74	52.76	20.676	58.676	1.50481	1.86768e-81	4.16325e-79	dor	PREDICTED: vacuolar protein sorting-associated protein 18 homolog [Bactrocera dorsalis]	-	-	-	-	-	GO:0046914//transition metal ion binding	GO:0006810//transport
LOC105230320	3333	3137	2051	2877	2967	9780	10711	8925	8598	9157	107.59	101.51	84.01	112.75	104.92	295.12	294.67	314.8	292.12	294.55	102.156	298.252	1.54576	2.11998e-81	4.64276e-79	B1	PREDICTED: esterase B1 [Bactrocera dorsalis]	-	-	-	-	-	-	-
LOC105227073	750	871	635	796	841	212	154	163	176	175	29.79	34.68	32	38.38	36.59	7.87	5.21	7.07	7.36	6.93	34.288	6.888	-2.31555	5.12661e-81	1.10337e-78	--	PREDICTED: mediator of RNA polymerase II transcription subunit 15 isoform X2 [Bactrocera oleae]	-	-	-	-	-	-	-
LOC105225678	434	343	423	292	360	34	42	45	46	38	9.35	7.4	11.56	7.63	8.49	0.68	0.77	1.06	1.04	0.82	8.886	0.874	-3.34583	1.41746e-78	2.90069e-76	BMP8A	PREDICTED: inhibin beta A chain [Bactrocera dorsalis]	-	-	-	-	-	GO:0005102//receptor binding	-
LOC105221991	911	852	754	826	998	227	272	214	154	220	44.72	41.92	46.96	49.22	53.67	10.42	11.38	11.48	7.96	10.76	47.298	10.4	-2.1852	5.12406e-76	1.0153e-73	E(spl)mbeta-HLH	PREDICTED: enhancer of split mbeta protein [Bactrocera dorsalis]	-	-	-	-	GO:0043231//intracellular membrane-bounded organelle	GO:0005515//protein binding	GO:0010468//regulation of gene expression;GO:0034645//cellular macromolecule biosynthetic process
T53i1	777	697	694	636	721	1685	1845	1491	1565	1619	32.54	29.74	37.36	32.24	33.05	66.46	65.85	68.8	68.85	68.53	32.986	67.698	1.03726	1.59224e-75	3.10562e-73	TP53INP1	PREDICTED: TBC1 domain family member 5 homolog A isoform X1 [Bactrocera cucurbitae]	Cellular Processes	Transport and catabolism	ko04140//Autophagy - animal	K21247	GO:0043231//intracellular membrane-bounded organelle;GO:0044444//cytoplasmic part	GO:0005488//binding	GO:0006996//organelle organization;GO:0007041//lysosomal transport;GO:0007154//cell communication;GO:0018130//heterocycle biosynthetic process;GO:0019438//aromatic compound biosynthetic process;GO:0046148//pigment biosynthetic process;GO:0048069//eye pigmentation;GO:0050794//regulation of cellular process;GO:0051716//cellular response to stimulus;GO:1901362//organic cyclic compound biosynthetic p…
LOC105230183	1004	914	813	762	817	2560	3002	1902	2188	2522	32.96	30.08	33.87	30.37	29.39	78.57	84	68.23	75.61	82.51	31.334	77.784	1.31174	1.6461e-75	3.16127e-73	DHRSX	PREDICTED: dehydrogenase/reductase SDR family member on chromosome X [Bactrocera dorsalis]	-	-	-	-	-	GO:0003824//catalytic activity	GO:0044710//single-organism metabolic process
LOC105227463	374	415	395	343	461	97	87	68	66	87	5.7	6.34	7.64	6.35	7.7	1.38	1.13	1.13	1.06	1.32	6.746	1.204	-2.4862	4.8766e-75	9.22343e-73	-	-	-	-	-	-	-	-	-
LOC105227401	353	373	286	348	373	82	90	79	93	80	5.9	6.24	6.06	7.06	6.82	1.28	1.28	1.44	1.63	1.33	6.416	1.392	-2.20451	1.22918e-74	2.29013e-72	rt	PREDICTED: protein O-mannosyltransferase 1 [Bactrocera dorsalis]	Metabolism;Metabolism;Metabolism	Global and overview maps;Glycan biosynthesis and metabolism;Glycan biosynthesis and metabolism	ko01100//Metabolic pathways;ko00514//Other types of O-glycan biosynthesis;ko00515//Mannose type O-glycan biosyntheis	K00728;K00728;K00728	-	GO:0016740//transferase activity	GO:0006486//protein glycosylation
LOC105229681	286	216	195	246	181	1302	1505	1529	1178	1325	20.81	15.75	18	21.73	14.43	88.55	93.32	121.55	90.21	96.06	18.144	97.938	2.43238	6.76686e-73	1.24222e-70	GST1	PREDICTED: glutathione S-transferase 1-like [Bactrocera dorsalis]	Human Diseases;Human Diseases;Metabolism;Organismal Systems;Human Diseases;Human Diseases;Metabolism;Metabolism;Metabolism;Human Diseases;Human Diseases	Cancers;Cancers;Xenobiotics biodegradation and metabolism;Aging;Cardiovascular diseases;Cancers;Xenobiotics biodegradation and metabolism;Metabolism of other amino acids;Xenobiotics biodegradation and metabolism;Cancers;Drug resistance	ko05200//Pathways in cancer;ko05225//Hepatocellular carcinoma;ko00983//Drug metabolism - other enzymes;ko04212//Longevity regulating pathway - worm;ko05418//Fluid shear stress and atherosclerosis;ko05215//Prostate cancer;ko00980//Metabolism of xenobiotics by cytochrome P450;ko00480//Glutathione metabolism;ko00982//Drug metabolism - cytochrome P450;ko05204//Chemical carcinogenesis;ko01524//Platinu…	K00799;K00799;K00799;K00799;K00799;K00799;K00799;K00799;K00799;K00799;K00799	-	-	-
LOC105225453	120845	129100	88608	99249	119969	66430	71387	50890	57764	59377	4550.79	4873.42	4234	4537.32	4949.11	2338.48	2291.07	2093.94	2289.46	2228.14	4628.93	2248.22	-1.0419	2.70683e-72	4.82704e-70	Act57B	PREDICTED: actin-2, muscle-specific [Ceratitis capitata]	Organismal Systems;Human Diseases;Human Diseases;Human Diseases;Human Diseases;Cellular Processes;Cellular Processes;Environmental Information Processing;Environmental Information Processing;Organismal Systems;Organismal Systems;Cellular Processes;Cellular Processes;Cellular Processes;Environmental Information Processing;Human Diseases;Organismal Systems;Cellular Processes;Organismal Systems;Huma…	Environmental adaptation;Cancers;Cancers;Infectious diseases;Cardiovascular diseases;Cellular community - eukaryotes;Transport and catabolism;Signal transduction;Signal transduction;Endocrine system;Endocrine system;Cell motility;Cellular community - eukaryotes;Cell growth and death;Signal transduction;Infectious diseases;Immune system;Cellular community - eukaryotes;Digestive system;Infectious d…	ko04714//Thermogenesis;ko05205//Proteoglycans in cancer;ko05225//Hepatocellular carcinoma;ko05164//Influenza A;ko05418//Fluid shear stress and atherosclerosis;ko04510//Focal adhesion;ko04145//Phagosome;ko04015//Rap1 signaling pathway;ko04390//Hippo signaling pathway;ko04919//Thyroid hormone signaling pathway;ko04921//Oxytocin signaling pathway;ko04810//Regulation of actin cytoskeleton;ko04530//Ti…	K05692;K05692;K05692;K05692;K05692;K05692;K05692;K05692;K05692;K05692;K05692;K05692;K05692;K05692;K05692;K05692;K05692;K05692;K05692;K05692;K05692;K05692;K05692;K05692;K05692;K05692;K05692;K05692;K05692	GO:0015629//actin cytoskeleton;GO:0016020//membrane;GO:0043234//protein complex	GO:0005198//structural molecule activity	GO:0007528//neuromuscular junction development;GO:0031023//microtubule organizing center organization;GO:0042993//positive regulation of transcription factor import into nucleus;GO:0044767//single-organism developmental process;GO:0061640//cytoskeleton-dependent cytokinesis
LOC105223413	447	496	380	456	532	115	88	101	100	98	4.83	5.37	5.21	5.98	6.3	1.16	0.81	1.19	1.13	1.05	5.538	1.068	-2.37445	6.09509e-72	1.07162e-69	CDH23	Cadherin-23, partial [Bactrocera dorsalis]	-	-	-	-	GO:0031224//intrinsic component of membrane	-	GO:0098742//cell-cell adhesion via plasma-membrane adhesion molecules
LOC105226894	3204	3779	2637	2780	3589	1263	1656	1151	1177	1211	275.81	326.09	288.04	290.52	338.45	101.63	121.49	108.26	106.64	103.88	303.782	108.38	-1.48694	1.16905e-70	2.02683e-68	--	GH19735 [Drosophila grimshawi]	-	-	-	-	-	-	-
MSTRG.2965	790	676	540	756	847	134	173	88	129	140	7.67	6.51	6.53	9.11	9.23	1.2	1.48	0.92	1.35	1.3	7.81	1.25	-2.64339	7.21885e-70	1.23442e-67	Insrr	PREDICTED: receptor-type guanylate cyclase gcy-8-like [Bactrocera latifrons]	-	-	-	-	GO:0016021//integral component of membrane;GO:0043231//intracellular membrane-bounded organelle;GO:0043235//receptor complex;GO:0044444//cytoplasmic part;GO:0044459//plasma membrane part	GO:0004714//transmembrane receptor protein tyrosine kinase activity;GO:0004869//cysteine-type endopeptidase inhibitor activity;GO:0005102//receptor binding;GO:0005504//fatty acid binding;GO:0005520//insulin-like growth factor binding;GO:0019901//protein kinase binding;GO:0019902//phosphatase binding;GO:0019904//protein domain specific binding;GO:0032550//purine ribonucleoside binding	GO:0002009//morphogenesis of an epithelium;GO:0002376//immune system process;GO:0006275//regulation of DNA replication;GO:0006469//negative regulation of protein kinase activity;GO:0007088//regulation of mitotic nuclear division;GO:0007169//transmembrane receptor protein tyrosine kinase signaling pathway;GO:0007530//sex determination;GO:0009746//response to hexose;GO:0009792//embryo development e…
LOC105230937	280	279	196	191	126	1796	2182	2210	1712	1732	5.62	5.58	5.04	4.54	2.72	33.32	36.9	48.2	35.8	34.12	4.7	37.668	3.00261	6.32541e-69	1.0528e-66	Anpep	PREDICTED: aminopeptidase N isoform X2 [Bactrocera dorsalis]	Metabolism;Metabolism;Organismal Systems;Organismal Systems	Global and overview maps;Metabolism of other amino acids;Endocrine system;Immune system	ko01100//Metabolic pathways;ko00480//Glutathione metabolism;ko04614//Renin-angiotensin system;ko04640//Hematopoietic cell lineage	K11140;K11140;K11140;K11140	-	-	-
LOC105227078	1287	1199	980	1217	1153	5110	7284	5002	4558	4184	39.78	37.15	38.43	45.66	39.04	147.63	191.86	168.92	148.27	128.86	40.012	157.108	1.97325	8.63313e-69	1.41799e-66	Orct	PREDICTED: organic cation transporter protein [Bactrocera dorsalis]	-	-	-	-	GO:0031224//intrinsic component of membrane	GO:0005215//transporter activity	GO:0044763//single-organism cellular process
LOC105230985	129	142	111	116	104	429	469	380	412	449	6.15	6.78	6.71	6.71	5.43	19.11	19.05	19.79	20.66	21.33	6.356	19.988	1.65294	1.51373e-67	2.42255e-65	-	-	-	-	-	-	-	-	-
LOC105232649	882	910	684	689	692	2021	2023	1500	1712	1863	17.7	18.3	17.42	16.78	15.21	37.91	34.6	32.89	36.16	37.25	17.082	35.762	1.06595	2.34455e-67	3.70469e-65	ada2	PREDICTED: adenosine deaminase CECR1-A [Bactrocera dorsalis]	Metabolism;Metabolism	Global and overview maps;Nucleotide metabolism	ko01100//Metabolic pathways;ko00230//Purine metabolism	K19572;K19572	-	-	-
LOC105221864	135	257	189	247	189	2322	1969	2181	1806	1729	13.26	25.31	23.56	29.46	20.34	213.26	164.87	234.13	186.75	169.24	22.386	193.65	3.11278	3.26819e-66	5.00654e-64	--	PREDICTED: general odorant-binding protein 56d-like [Bactrocera dorsalis]	-	-	-	-	-	-	-
LOC105223629	1456	1239	1182	1268	1119	3527	3663	3140	3150	3460	35.12	29.96	36.17	37.13	29.57	79.52	75.29	82.75	79.96	83.16	33.59	80.136	1.25442	3.28876e-66	5.00654e-64	SCARB1	PREDICTED: lysosome membrane protein 2 [Bactrocera dorsalis]	-	-	-	-	GO:0031224//intrinsic component of membrane	-	-
LOC105226392	861	949	696	822	939	220	260	115	184	175	10.66	11.78	10.93	12.35	12.73	2.55	2.74	1.56	2.4	2.16	11.69	2.282	-2.3569	4.893e-66	7.35896e-64	--	PREDICTED: protein artichoke [Bactrocera dorsalis]	-	-	-	-	-	-	-
LOC105232389	35	38	54	23	25	435	523	518	422	434	2.36	2.56	4.61	1.88	1.84	27.36	29.99	38.08	29.89	29.1	2.65	30.884	3.5428	6.7937e-66	1.00959e-63	--	PREDICTED: uncharacterized protein LOC105232389 [Bactrocera dorsalis]	-	-	-	-	-	-	-
LOC105226601	13867	12856	9368	13636	13209	41772	50363	39469	38491	40350	811.12	753.81	695.3	968.29	846.4	2284.02	2510.6	2522.52	2369.63	2351.87	814.984	2407.73	1.56283	2.53096e-65	3.6315e-63	to	PREDICTED: protein takeout-like [Bactrocera dorsalis]	-	-	-	-	-	-	-
LOC105225607	427	354	378	327	786	4	7	2	7	4	29.03	24.13	32.61	26.99	58.54	0.25	0.41	0.15	0.5	0.27	34.26	0.316	-6.76046	3.27714e-65	4.64869e-63	--	PREDICTED: glycine-rich cell wall structural protein 2-like isoform X2 [Bactrocera dorsalis]	-	-	-	-	-	-	-
LOC105230744	1836	1877	1174	1501	1513	683	669	465	572	629	39.28	40.25	31.87	38.98	35.46	13.66	12.2	10.87	12.88	13.41	37.168	12.604	-1.56018	2.24607e-64	3.1503e-62	--	Leucine-rich repeat-containing protein 15 [Bactrocera dorsalis]	-	-	-	-	-	-	-
LOC105228331	9526	9437	7171	9326	8855	23517	24326	19773	20240	21400	229.67	228.07	219.38	272.96	233.87	530.01	499.83	520.88	513.59	514.12	236.79	515.686	1.12288	2.97728e-64	4.12948e-62	-	-	-	-	-	-	-	-	-
LOC105230951	7004	7989	6373	4434	6166	1739	1584	1448	1542	2087	113.08	129.8	130.8	86.96	108.95	26.26	21.76	25.65	26.28	33.68	113.918	26.726	-2.09168	1.11592e-62	1.51413e-60	XDH	PREDICTED: xanthine dehydrogenase-like [Bactrocera dorsalis]	Metabolism;Metabolism;Metabolism;Cellular Processes;Metabolism	Global and overview maps;Nucleotide metabolism;Xenobiotics biodegradation and metabolism;Transport and catabolism;Biosynthesis of other secondary metabolites	ko01100//Metabolic pathways;ko00230//Purine metabolism;ko00983//Drug metabolism - other enzymes;ko04146//Peroxisome;ko00232//Caffeine metabolism	K00106;K00106;K00106;K00106;K00106	-	GO:0000166//nucleotide binding;GO:0016616//oxidoreductase activity, acting on the CH-OH group of donors, NAD or NADP as acceptor;GO:0016726//oxidoreductase activity, acting on CH or CH2 groups, NAD or NADP as acceptor;GO:0016727//oxidoreductase activity, acting on CH or CH2 groups, oxygen as acceptor;GO:0046914//transition metal ion binding;GO:0050662//coenzyme binding;GO:0051536//iron-sulfur clu…	GO:0006259//DNA metabolic process;GO:0044710//single-organism metabolic process
LOC105233083	738	688	440	765	666	3416	5333	4328	3589	3695	43.36	40.52	32.8	54.57	42.87	187.62	267.05	277.85	221.94	216.34	42.824	234.16	2.451	1.31023e-61	1.75867e-59	ADH	PREDICTED: alcohol dehydrogenase [Bactrocera dorsalis]	-	-	-	-	-	GO:0003824//catalytic activity	GO:0044281//small molecule metabolic process
LOC105232323	807	760	685	529	730	283	310	248	276	307	15.95	14.98	17.18	12.64	15.85	5.22	5.18	5.37	5.68	6.05	15.32	5.5	-1.47791	5.03013e-60	6.40725e-58	spi	PREDICTED: protein spitz [Bactrocera dorsalis]	Environmental Information Processing	Signal transduction	ko04013//MAPK signaling pathway - fly	K20229	-	-	-
LOC105223871	268	296	207	188	264	27	49	47	34	39	3.66	4.06	3.59	3.12	3.95	0.35	0.57	0.7	0.49	0.53	3.676	0.528	-2.79953	3.46178e-59	4.32134e-57	ham	PREDICTED: Krueppel-like factor luna [Bactrocera dorsalis]	-	-	-	-	-	GO:0043169//cation binding	GO:0010468//regulation of gene expression
LOC105231755	71	76	47	58	52	310	359	268	255	337	2.93	3.14	2.46	2.9	2.35	11.95	12.61	12.07	11.06	13.84	2.756	12.306	2.15871	3.55369e-59	4.39215e-57	P4HA2	PREDICTED: prolyl 4-hydroxylase subunit alpha-2 isoform X1 [Bactrocera dorsalis]	Metabolism;Metabolism	Global and overview maps;Amino acid metabolism	ko01100//Metabolic pathways;ko00330//Arginine and proline metabolism	K00472;K00472	-	GO:0016705//oxidoreductase activity, acting on paired donors, with incorporation or reduction of molecular oxygen;GO:0043167//ion binding	GO:0008152//metabolic process
LOC105223668	4603	4863	3397	5245	4174	17576	17692	14169	14856	15725	115.85	122.69	108.48	160.26	115.08	413.51	379.48	389.64	393.52	394.37	124.472	394.104	1.66276	1.17551e-58	1.42465e-56	AAEL008004	Elongation of very long chain fatty acids protein AAEL008004 [Bactrocera dorsalis]	-	-	-	-	GO:0031224//intrinsic component of membrane	GO:0003824//catalytic activity	GO:0006631//fatty acid metabolic process
LOC105222920	81	79	51	62	62	315	407	253	301	347	2.79	2.74	2.23	2.62	2.34	10.2	12.02	9.56	10.97	11.97	2.544	10.944	2.10497	2.13345e-57	2.53637e-55	--	PREDICTED: vitellogenin-A2 [Musca domestica]	-	-	-	-	-	-	-
LOC105234004	550	579	484	364	518	141	94	72	114	112	7.76	8.19	8.66	6.23	8.01	1.86	1.13	1.11	1.69	1.57	7.77	1.472	-2.40014	6.47254e-57	7.62233e-55	-	-	-	-	-	-	-	-	-
LOC105226694	4185	4079	3225	4222	4011	10627	12216	9000	9453	9677	116.55	113.88	113.97	142.75	122.37	276.66	289.95	273.87	277.09	268.56	121.904	277.226	1.18532	7.84205e-57	9.13508e-55	wat	RE14390p, partial [Drosophila melanogaster]	-	-	-	-	-	GO:0016620//oxidoreductase activity, acting on the aldehyde or oxo group of donors, NAD or NADP as acceptor	-
LOC105223592	223	183	195	177	273	15	25	11	14	24	1.1	0.9	1.22	1.06	1.47	0.07	0.11	0.06	0.07	0.12	1.15	0.086	-3.74115	7.90346e-57	9.13508e-55	ds	PREDICTED: protein dachsous [Bactrocera dorsalis]	Environmental Information Processing;Environmental Information Processing	Signal transduction;Signal transduction	ko04391//Hippo signaling pathway -fly;ko04392//Hippo signaling pathway - multiple species	K16507;K16507	-	-	-
LOC105223192	7226	9092	5732	8278	7532	32675	48454	25907	37641	35702	120.17	151.85	121.03	167.7	137.84	508.54	686.68	473.08	660.08	593.79	139.718	584.434	2.06452	1.21068e-56	1.38506e-54	CG4928	PREDICTED: UNC93-like protein isoform X1 [Bactrocera dorsalis]	-	-	-	-	GO:0016020//membrane	-	GO:0044763//single-organism cellular process
LOC105224952	1193	1172	1123	858	1061	343	490	285	347	296	25.51	25.13	30.48	22.28	24.86	6.86	8.93	6.66	7.81	6.31	25.652	7.314	-1.81034	2.47526e-56	2.75881e-54	MSSP1	PREDICTED: synaptic vesicle glycoprotein 2A [Bactrocera dorsalis]	-	-	-	-	-	GO:0005215//transporter activity	GO:0044763//single-organism cellular process
LOC105225512	25699	25554	19111	25601	24695	65202	82015	64458	60144	64150	2338.56	2331	2206.67	2828.17	2461.74	5546.32	6360.46	6408.91	5760.27	5816.95	2433.23	5978.58	1.29693	9.86665e-55	1.071e-52	EbpIII	PREDICTED: ejaculatory bulb-specific protein 3 [Bactrocera dorsalis]	-	-	-	-	-	-	-
LOC105229626	385	324	279	214	321	1534	2896	2747	1903	2474	22.76	19.2	20.93	15.36	20.79	84.79	145.93	177.47	118.43	145.77	19.808	134.478	2.76322	1.887e-54	2.03064e-52	FGL2	Ficolin-1, partial [Bactrocera dorsalis]	-	-	-	-	-	-	-
LOC105232427	12419	9761	6453	9851	9486	34786	45345	34939	32206	34985	629.98	496.35	415.36	606.65	527.14	1649.52	1960.35	1936.54	1719.47	1768.44	535.096	1806.86	1.75562	1.39227e-53	1.47285e-51	--	Circadian clock-controlled protein [Bactrocera dorsalis]	-	-	-	-	-	-	-
LOC105222986	204	230	226	256	328	25	32	19	31	22	3.01	3.4	4.23	4.58	5.3	0.34	0.4	0.31	0.48	0.32	4.104	0.37	-3.47143	3.33525e-53	3.46949e-51	CHIA	Acidic mammalian chitinase [Bactrocera dorsalis]	Metabolism;Metabolism	Global and overview maps;Carbohydrate metabolism	ko01100//Metabolic pathways;ko00520//Amino sugar and nucleotide sugar metabolism	K01183;K01183	-	GO:0004553//hydrolase activity, hydrolyzing O-glycosyl compounds;GO:0097367//carbohydrate derivative binding	GO:0006026//aminoglycan catabolic process;GO:0044238//primary metabolic process
LOC105230752	612	689	580	539	797	165	215	153	166	218	3.91	4.43	4.74	4.24	5.57	0.97	1.15	1.06	1.09	1.36	4.578	1.126	-2.02351	5.37129e-53	5.5413e-51	--	PREDICTED: mucin-5AC isoform X1 [Bactrocera dorsalis]	-	-	-	-	-	-	-
LOC105226824	633	626	321	576	549	2911	3476	3045	2536	2294	33.23	32.99	21.31	36.67	31.46	142.77	155.3	174.64	140.02	119.83	31.132	146.512	2.23455	5.50127e-53	5.62888e-51	Cp1	PREDICTED: cathepsin L1 [Bactrocera dorsalis]	Cellular Processes;Human Diseases;Cellular Processes;Human Diseases;Cellular Processes;Cellular Processes;Human Diseases;Organismal Systems	Transport and catabolism;Cancers;Transport and catabolism;Cardiovascular diseases;Transport and catabolism;Cell growth and death;Immune diseases;Immune system	ko04142//Lysosome;ko05205//Proteoglycans in cancer;ko04140//Autophagy - animal;ko05418//Fluid shear stress and atherosclerosis;ko04145//Phagosome;ko04210//Apoptosis;ko05323//Rheumatoid arthritis;ko04612//Antigen processing and presentation	K01365;K01365;K01365;K01365;K01365;K01365;K01365;K01365	-	GO:0008233//peptidase activity	-
LOC105222515	180	221	174	169	211	49	32	27	33	30	6.37	7.83	7.85	7.26	8.15	1.64	0.97	1.06	1.23	1.07	7.492	1.194	-2.64955	5.92345e-53	6.01157e-51	--	PREDICTED: chondroitin proteoglycan-2-like [Bactrocera dorsalis]	-	-	-	-	-	GO:0097367//carbohydrate derivative binding	GO:0006022//aminoglycan metabolic process
LOC105232331	335	300	381	268	347	60	83	63	50	58	6.66	5.98	9.61	6.47	7.56	1.12	1.41	1.37	1.05	1.15	7.256	1.22	-2.57229	1.37803e-52	1.37616e-50	Nep3	PREDICTED: endothelin-converting enzyme 1 [Bactrocera dorsalis]	-	-	-	-	-	GO:0070011//peptidase activity, acting on L-amino acid peptides	GO:0019538//protein metabolic process
LOC105230298	241	255	205	231	287	956	1312	749	813	933	8.16	8.66	8.81	9.5	10.65	30.27	37.87	27.72	28.98	31.49	9.156	31.266	1.77181	2.31918e-52	2.29765e-50	--	PREDICTED: arrestin domain-containing protein 5 [Ceratitis capitata]	-	-	-	-	-	-	-
LOC105224702	1846	1745	1373	1315	1552	863	869	862	838	841	58.89	55.8	55.58	50.93	54.24	25.74	23.63	30.05	28.14	26.74	55.088	26.86	-1.03628	1.0359e-51	1.00241e-49	Nop60B	H/ACA ribonucleoprotein complex subunit 4, partial [Bactrocera dorsalis]	Genetic Information Processing	Translation	ko03008//Ribosome biogenesis in eukaryotes	K11131	GO:0032991//macromolecular complex;GO:0043231//intracellular membrane-bounded organelle;GO:0043232//intracellular non-membrane-bounded organelle;GO:0044423//virion part	GO:0003676//nucleic acid binding;GO:0016836//hydro-lyase activity;GO:0016866//intramolecular transferase activity	GO:0003006//developmental process involved in reproduction;GO:0007444//imaginal disc development;GO:0009451//RNA modification;GO:0010467//gene expression;GO:0016072//rRNA metabolic process;GO:0022613//ribonucleoprotein complex biogenesis;GO:0030154//cell differentiation;GO:0033554//cellular response to stress
LOC105233219	742	575	439	503	735	2075	2622	1847	1960	1952	22.98	17.85	17.25	18.91	24.93	60.06	69.19	62.49	63.88	60.23	20.384	63.17	1.6318	4.34255e-51	4.13802e-49	-	-	-	-	-	-	-	-	-
LOC105233803	18	8	13	28	32	457	703	575	435	382	1.37	0.61	1.25	2.58	2.66	32.45	45.52	47.72	34.78	28.92	1.694	37.878	4.48285	4.84605e-51	4.58282e-49	--	PREDICTED: uncharacterized protein LOC105233803 [Bactrocera dorsalis]	-	-	-	-	-	-	-
LOC105232877	13	37	36	29	56	534	899	626	553	617	0.37	1.05	1.29	1	1.73	14.11	21.66	19.34	16.46	17.38	1.088	17.79	4.03132	9.15463e-51	8.52815e-49	PPO2	PREDICTED: LOW QUALITY PROTEIN: phenoloxidase 2 [Bactrocera dorsalis]	-	-	-	-	-	-	-
LOC105225237	1568	1600	1343	1145	1556	3854	5196	4764	3961	4723	53.7	54.89	58.32	47.8	57.95	123.3	151.86	178.54	143.08	161.83	54.532	151.722	1.47626	1.9891e-50	1.79927e-48	Oat	PREDICTED: ornithine aminotransferase, mitochondrial [Bactrocera dorsalis]	Metabolism;Metabolism	Global and overview maps;Amino acid metabolism	ko01100//Metabolic pathways;ko00330//Arginine and proline metabolism	K00819;K00819	GO:0044429//mitochondrial part	GO:0008483//transaminase activity;GO:0043168//anion binding	GO:0030154//cell differentiation;GO:1901605//alpha-amino acid metabolic process
LOC105230858	198	258	210	219	215	57	64	45	45	54	6.57	8.54	8.78	8.79	7.82	1.75	1.81	1.63	1.53	1.78	8.1	1.7	-2.25239	2.62187e-50	2.35459e-48	far1	PREDICTED: putative fatty acyl-CoA reductase CG5065 [Bactrocera dorsalis]	Cellular Processes;Organismal Systems;Metabolism	Transport and catabolism;Aging;Lipid metabolism	ko04146//Peroxisome;ko04212//Longevity regulating pathway - worm;ko00073//Cutin, suberine and wax biosynthesis	K13356;K13356;K13356	-	GO:0016620//oxidoreductase activity, acting on the aldehyde or oxo group of donors, NAD or NADP as acceptor	-
LOC105233201	3687	3031	2500	2555	2407	1370	1427	956	1165	1044	86.72	71.5	74.87	73.12	62.19	30.25	28.68	24.62	29.06	24.53	73.68	27.428	-1.42562	3.13554e-50	2.79578e-48	CG42265	PREDICTED: otopetrin-2 isoform X1 [Bactrocera dorsalis]	-	-	-	-	-	-	-
LOC105224951	38	65	31	78	50	510	571	523	461	545	1.46	2.5	1.51	3.63	2.1	18.26	18.64	21.88	18.58	20.8	2.24	19.632	3.13164	5.70137e-50	5.04753e-48	-	-	-	-	-	-	-	-	-
LOC105230316	304	262	226	236	246	608	674	510	572	586	4.75	4.1	4.48	4.48	4.21	8.88	8.98	8.71	9.41	9.13	4.404	9.022	1.03463	9.40212e-50	8.26526e-48	-	-	-	-	-	-	-	-	-
LOC105232645	132	111	80	87	76	416	565	376	388	388	4.87	4.1	3.74	3.9	3.07	14.35	17.76	15.16	15.07	14.26	3.936	15.32	1.96061	9.74108e-50	8.50335e-48	vanin-like	PREDICTED: vanin-like protein 1 [Bactrocera dorsalis]	Metabolism;Organismal Systems;Metabolism	Global and overview maps;Digestive system;Metabolism of cofactors and vitamins	ko01100//Metabolic pathways;ko04977//Vitamin digestion and absorption;ko00780//Biotin metabolism	K01435;K01435;K01435	-	-	-
LOC105225548	396	370	302	361	335	1022	1281	955	966	860	4.42	4.15	4.32	4.98	4.26	10.98	12.39	11.86	11.48	9.67	4.426	11.276	1.34918	2.69669e-49	2.33769e-47	rdgA	PREDICTED: eye-specific diacylglycerol kinase isoform X3 [Bactrocera dorsalis]	Metabolism;Environmental Information Processing;Environmental Information Processing;Human Diseases;Metabolism;Metabolism	Global and overview maps;Signal transduction;Signal transduction;Cancers;Lipid metabolism;Lipid metabolism	ko01100//Metabolic pathways;ko04072//Phospholipase D signaling pathway;ko04070//Phosphatidylinositol signaling system;ko05231//Choline metabolism in cancer;ko00564//Glycerophospholipid metabolism;ko00561//Glycerolipid metabolism	K00901;K00901;K00901;K00901;K00901;K00901	-	GO:0016301//kinase activity;GO:0032550//purine ribonucleoside binding	GO:0006796//phosphate-containing compound metabolic process;GO:0007186//G-protein coupled receptor signaling pathway
LOC105230501	387	356	366	257	375	1159	1600	1359	1181	1181	28.03	25.85	33.64	22.6	29.76	78.48	98.77	107.56	90.04	85.24	27.976	92.018	1.71773	4.11604e-49	3.51922e-47	--	PREDICTED: uncharacterized protein LOC105230501 [Bactrocera dorsalis]	-	-	-	-	-	-	-
LOC105233444	885	833	651	594	724	342	447	315	343	316	30.79	29.05	28.74	25.09	27.59	11.12	13.25	11.97	12.56	10.96	28.252	11.972	-1.23869	4.40471e-49	3.74041e-47	--	PREDICTED: LOW QUALITY PROTEIN: anosmin-1 [Bactrocera dorsalis]	-	-	-	-	-	GO:0004857//enzyme inhibitor activity	GO:0045861//negative regulation of proteolysis
LOC105233399	414	278	330	286	329	91	79	74	79	58	34.72	23.37	35.12	29.12	30.23	7.13	5.65	6.78	6.97	4.85	30.512	6.276	-2.28146	3.71111e-48	3.13012e-46	--	GL16604 [Drosophila persimilis]	-	-	-	-	-	-	-
LOC105228298	1409	1552	1220	1222	1563	3920	5495	4544	3784	3820	83.01	91.66	91.2	87.4	100.88	215.89	275.9	292.51	234.64	224.26	90.83	248.64	1.45282	4.6684e-48	3.91112e-46	GSTT1	PREDICTED: glutathione S-transferase theta-1 [Bactrocera dorsalis]	Human Diseases;Human Diseases;Metabolism;Organismal Systems;Human Diseases;Human Diseases;Metabolism;Metabolism;Metabolism;Human Diseases;Human Diseases	Cancers;Cancers;Xenobiotics biodegradation and metabolism;Aging;Cardiovascular diseases;Cancers;Xenobiotics biodegradation and metabolism;Metabolism of other amino acids;Xenobiotics biodegradation and metabolism;Cancers;Drug resistance	ko05200//Pathways in cancer;ko05225//Hepatocellular carcinoma;ko00983//Drug metabolism - other enzymes;ko04212//Longevity regulating pathway - worm;ko05418//Fluid shear stress and atherosclerosis;ko05215//Prostate cancer;ko00980//Metabolism of xenobiotics by cytochrome P450;ko00480//Glutathione metabolism;ko00982//Drug metabolism - cytochrome P450;ko05204//Chemical carcinogenesis;ko01524//Platinu…	K00799;K00799;K00799;K00799;K00799;K00799;K00799;K00799;K00799;K00799;K00799	-	GO:0003824//catalytic activity	-
LOC109579399	22	40	28	38	38	257	335	264	249	209	1.32	2.4	2.12	2.76	2.49	14.36	17.07	17.24	15.67	12.45	2.218	15.358	2.79166	1.87006e-47	1.52575e-45	--	PREDICTED: shematrin-like protein 2 [Bactrocera dorsalis]	-	-	-	-	-	-	-
LOC105228524	1230	1227	771	1114	886	3249	3541	2983	2852	3138	31.22	31.2	24.8	34.38	24.63	77.03	76.61	82.72	76.18	79.34	29.246	78.376	1.42217	6.79427e-47	5.4718e-45	Abcg1	PREDICTED: ATP-binding cassette sub-family G member 4 [Bactrocera dorsalis]	-	-	-	-	GO:0043234//protein complex	GO:0015405//P-P-bond-hydrolysis-driven transmembrane transporter activity;GO:0017111//nucleoside-triphosphatase activity;GO:0032550//purine ribonucleoside binding	GO:0006897//endocytosis
LOC105229889	45080	46184	31686	37326	46802	24726	25682	17979	21080	22386	1775.39	1823.28	1583.43	1784.59	2019.18	910.28	861.99	773.66	873.77	878.52	1797.17	859.644	-1.06392	6.99799e-47	5.59973e-45	Act87E	PREDICTED: actin-3, muscle-specific [Ceratitis capitata]	Organismal Systems;Human Diseases;Human Diseases;Human Diseases;Human Diseases;Cellular Processes;Cellular Processes;Environmental Information Processing;Environmental Information Processing;Organismal Systems;Organismal Systems;Cellular Processes;Cellular Processes;Cellular Processes;Environmental Information Processing;Human Diseases;Organismal Systems;Cellular Processes;Organismal Systems;Huma…	Environmental adaptation;Cancers;Cancers;Infectious diseases;Cardiovascular diseases;Cellular community - eukaryotes;Transport and catabolism;Signal transduction;Signal transduction;Endocrine system;Endocrine system;Cell motility;Cellular community - eukaryotes;Cell growth and death;Signal transduction;Infectious diseases;Immune system;Cellular community - eukaryotes;Digestive system;Infectious d…	ko04714//Thermogenesis;ko05205//Proteoglycans in cancer;ko05225//Hepatocellular carcinoma;ko05164//Influenza A;ko05418//Fluid shear stress and atherosclerosis;ko04510//Focal adhesion;ko04145//Phagosome;ko04015//Rap1 signaling pathway;ko04390//Hippo signaling pathway;ko04919//Thyroid hormone signaling pathway;ko04921//Oxytocin signaling pathway;ko04810//Regulation of actin cytoskeleton;ko04530//Ti…	K05692;K05692;K05692;K05692;K05692;K05692;K05692;K05692;K05692;K05692;K05692;K05692;K05692;K05692;K05692;K05692;K05692;K05692;K05692;K05692;K05692;K05692;K05692;K05692;K05692;K05692;K05692;K05692;K05692	GO:0015629//actin cytoskeleton;GO:0016020//membrane;GO:0043234//protein complex	GO:0003824//catalytic activity;GO:0005198//structural molecule activity;GO:0032550//purine ribonucleoside binding	GO:0006720//isoprenoid metabolic process;GO:0007528//neuromuscular junction development;GO:0031023//microtubule organizing center organization;GO:0042993//positive regulation of transcription factor import into nucleus;GO:0044767//single-organism developmental process;GO:0061640//cytoskeleton-dependent cytokinesis
LOC105224047	771	399	425	291	471	2867	5517	4118	3446	3550	29.91	15.52	20.92	13.71	20.02	103.98	182.42	174.57	140.72	137.25	20.016	147.788	2.8843	1.50107e-46	1.19349e-44	-	-	-	-	-	-	-	-	-
LOC105230347	145	104	102	66	89	480	618	626	545	606	6.3	4.53	5.63	3.48	4.24	19.51	22.9	29.73	24.94	26.25	4.836	24.666	2.35064	1.72075e-46	1.3595e-44	AGAP009593	PREDICTED: zinc carboxypeptidase-like [Bactrocera dorsalis]	-	-	-	-	-	GO:0008235//metalloexopeptidase activity;GO:0046914//transition metal ion binding	GO:0019538//protein metabolic process
LOC105232977	924	1140	879	796	1271	221	285	108	170	155	20.71	25.61	25	21.66	31.21	4.63	5.44	2.64	4.01	3.46	24.838	4.036	-2.62155	2.79937e-46	2.19777e-44	-	-	-	-	-	-	-	-	-
LOC105232700	17	28	11	15	14	188	389	298	218	258	1.99	3.29	1.64	2.14	1.8	20.61	38.89	38.19	26.91	30.16	2.172	30.952	3.83294	5.60776e-46	4.34793e-44	--	GL15427 [Drosophila persimilis]	-	-	-	-	-	-	-
LOC105226864	775	832	622	561	783	328	307	304	327	331	25.26	27.67	26.81	22.88	28.23	9.76	8.71	10.1	11.58	10.91	26.17	10.212	-1.35765	6.09351e-46	4.69539e-44	ken	PREDICTED: transcription factor Ken isoform X2 [Bactrocera dorsalis]	-	-	-	-	-	-	-
LOC105224532	21	33	30	18	29	173	216	174	154	177	1.78	2.81	3.16	1.86	2.64	13.69	15.56	16.1	13.77	14.94	2.45	14.812	2.59591	2.43399e-45	1.84142e-43	PLA2	PREDICTED: phospholipase A2 [Bactrocera dorsalis]	Metabolism;Organismal Systems;Environmental Information Processing;Organismal Systems;Metabolism;Organismal Systems;Metabolism;Metabolism;Metabolism;Metabolism	Global and overview maps;Digestive system;Signal transduction;Circulatory system;Lipid metabolism;Digestive system;Lipid metabolism;Lipid metabolism;Lipid metabolism;Lipid metabolism	ko01100//Metabolic pathways;ko04972//Pancreatic secretion;ko04014//Ras signaling pathway;ko04270//Vascular smooth muscle contraction;ko00564//Glycerophospholipid metabolism;ko04975//Fat digestion and absorption;ko00565//Ether lipid metabolism;ko00590//Arachidonic acid metabolism;ko00592//alpha-Linolenic acid metabolism;ko00591//Linoleic acid metabolism	K01047;K01047;K01047;K01047;K01047;K01047;K01047;K01047;K01047;K01047	-	GO:0004623//phospholipase A2 activity;GO:0046872//metal ion binding	GO:0006629//lipid metabolic process;GO:0006796//phosphate-containing compound metabolic process
LOC105231671	1636	1693	1140	1394	1668	543	815	558	543	542	69.64	72.24	61.57	72.03	77.78	21.61	29.56	25.95	24.33	22.99	70.652	24.888	-1.50528	3.39566e-45	2.53821e-43	--	PREDICTED: uncharacterized protein LOC105231671 [Bactrocera dorsalis]	-	-	-	-	-	-	-
LOC105224839	135	162	159	138	203	4	1	2	6	2	14.16	17.13	21.17	17.29	23.27	0.37	0.09	0.24	0.69	0.22	18.604	0.322	-5.85241	2.76733e-44	1.9968e-42	--	PREDICTED: pupal cuticle protein G1A-like isoform X1 [Bactrocera dorsalis]	-	-	-	-	-	-	-
LOC105231611	7375	8702	3963	6947	4988	30468	32593	25049	26712	28526	376.45	445.26	256.68	430.49	278.92	1453.79	1417.86	1397.05	1435.06	1450.96	357.56	1430.94	2.00071	4.77567e-44	3.40656e-42	--	PREDICTED: protein takeout [Bactrocera dorsalis]	-	-	-	-	-	-	-
LOC105223590	112	97	95	118	93	413	386	353	330	384	2.76	2.4	2.98	3.54	2.51	9.53	8.12	9.52	8.57	9.44	2.838	9.036	1.67081	4.86732e-44	3.45221e-42	-	-	-	-	-	-	-	-	-
LOC105223646	2227	2596	2379	2698	3053	8754	9200	8445	9809	9314	26.79	31.17	36.13	39.49	40.33	98.63	94.75	111.13	124.24	111.53	34.782	108.056	1.63537	5.61776e-44	3.96195e-42	AAEL008004	PREDICTED: elongation of very long chain fatty acids protein AAEL008004 isoform X1 [Bactrocera dorsalis]	-	-	-	-	-	-	-
LOC105226474	1114	1007	861	738	878	514	591	489	496	497	18.39	16.12	18.26	14.78	16.05	7.3	8.01	8.35	8.11	8.21	16.72	7.996	-1.06422	1.49023e-43	1.03925e-41	--	PREDICTED: A-agglutinin anchorage subunit [Bactrocera oleae]	-	-	-	-	-	-	-
LOC105228901	231	306	214	277	187	907	1011	844	873	954	4.86	6.48	5.74	7.07	4.33	17.98	18.22	19.59	19.59	20.31	5.696	19.138	1.74842	1.97426e-43	1.36915e-41	scaf	PREDICTED: serine proteinase stubble [Bactrocera dorsalis]	-	-	-	-	-	GO:0004175//endopeptidase activity	GO:0019538//protein metabolic process
LOC105231537	12673	10817	7159	12601	10585	39864	48308	46977	40482	45972	495.82	424.23	355.38	598.51	453.66	1457.9	1610.73	2008.19	1666.93	1792.27	465.52	1707.2	1.87472	2.10224e-43	1.44985e-41	Cyp6g1	PREDICTED: LOW QUALITY PROTEIN: cytochrome P450 6g1-like [Bactrocera dorsalis]	-	-	-	-	-	GO:0016491//oxidoreductase activity;GO:0046906//tetrapyrrole binding	GO:0044710//single-organism metabolic process
LOC105223787	990	990	902	796	897	2616	3825	3908	3253	3774	21.44	21.96	25.55	21.04	21.5	56.91	75.87	99.4	79.9	87.09	22.298	79.834	1.84009	2.33939e-43	1.60454e-41	GPCPD1	PREDICTED: glycerophosphocholine phosphodiesterase GPCPD1 isoform X5 [Bactrocera dorsalis]	-	-	-	-	-	-	-
LOC105229216	27	37	22	12	16	282	298	239	232	167	1.02	1.4	1.06	0.55	0.66	9.98	9.61	9.89	9.24	6.3	0.938	9.004	3.26291	4.27382e-43	2.91531e-41	HEXB	Beta-hexosaminidase subunit beta, partial [Bactrocera dorsalis]	Metabolism;Cellular Processes;Metabolism;Metabolism;Metabolism;Metabolism;Metabolism	Global and overview maps;Transport and catabolism;Carbohydrate metabolism;Glycan biosynthesis and metabolism;Glycan biosynthesis and metabolism;Glycan biosynthesis and metabolism;Glycan biosynthesis and metabolism	ko01100//Metabolic pathways;ko04142//Lysosome;ko00520//Amino sugar and nucleotide sugar metabolism;ko00511//Other glycan degradation;ko00531//Glycosaminoglycan degradation;ko00604//Glycosphingolipid biosynthesis - ganglio series;ko00603//Glycosphingolipid biosynthesis - globo and isoglobo series	K12373;K12373;K12373;K12373;K12373;K12373;K12373	-	GO:0015929//hexosaminidase activity	GO:0044238//primary metabolic process
LOC105229288	7975	8164	5922	6566	9012	3444	3989	3087	3051	2534	444.59	456.23	418.91	444.37	550.37	179.48	189.52	188.04	179.01	140.77	462.894	175.364	-1.40033	1.94368e-42	1.29058e-40	EIF4EBP1	PREDICTED: eukaryotic translation initiation factor 4E-binding protein 3 [Bactrocera dorsalis]	Genetic Information Processing;Organismal Systems	Translation;Aging	ko03013//RNA transport;ko04213//Longevity regulating pathway - multiple species	K18644;K18644	-	-	GO:0006446//regulation of translational initiation
LOC105224101	766	864	651	1058	871	3614	5404	5434	4082	4872	78.45	88.7	84.59	131.53	97.71	345.97	471.64	608.04	439.97	497.18	96.196	472.56	2.29645	2.97645e-42	1.95553e-40	--	odorant binding protein 50c [Bactrocera dorsalis]	-	-	-	-	-	-	-
LOC105225272	943	1143	966	684	1403	284	211	200	233	260	82.48	100.22	107.21	72.3	130.55	23.22	15.73	19.11	21.45	22.66	98.552	20.434	-2.26991	3.7864e-42	2.47464e-40	TpnC73F	PREDICTED: troponin C, isoform 3 [Bactrocera cucurbitae]	-	-	-	-	-	GO:0046872//metal ion binding	-
LOC105230098	658	546	534	505	586	1370	1439	1412	1288	1294	26.79	22.28	27.58	24.96	26.13	52.13	49.92	62.8	55.18	52.49	25.548	54.504	1.09315	4.63299e-42	3.01216e-40	--	PREDICTED: hyphally-regulated protein [Bactrocera cucurbitae]	-	-	-	-	-	GO:0016787//hydrolase activity;GO:0097159//organic cyclic compound binding;GO:1901363//heterocyclic compound binding	-
LOC105225887	24	28	12	31	33	258	464	225	243	272	1.27	1.48	0.81	1.99	1.91	12.76	20.92	13.01	13.53	14.34	1.492	14.912	3.32115	7.05417e-42	4.56255e-40	SULT1C4	PREDICTED: sulfotransferase 1C4 [Bactrocera dorsalis]	-	-	-	-	-	-	-
LOC105223602	1251	1532	1048	1218	1207	2780	3141	2492	2803	3055	7.81	9.58	8.3	9.23	8.25	16.22	16.7	16.99	18.41	19	8.634	17.464	1.01628	1.7571e-41	1.13061e-39	-	-	-	-	-	-	-	-	-
LOC105224724	1971	1684	1247	1798	1396	4835	5091	4629	4464	4879	76.84	65.81	61.68	85.09	59.62	176.19	169.14	197.17	183.16	189.53	69.808	183.038	1.39068	1.87761e-41	1.20196e-39	PLB1	PREDICTED: LOW QUALITY PROTEIN: phospholipase B1, membrane-associated [Bactrocera dorsalis]	-	-	-	-	-	GO:0016787//hydrolase activity	GO:0006897//endocytosis
LOC105229867	509	346	417	353	392	1456	2166	1928	1495	1513	11.85	8.07	12.32	9.97	10	31.68	42.97	49.03	36.62	35.09	10.442	39.078	1.90396	7.6293e-41	4.80993e-39	--	Endothelin-converting enzyme 1 [Ceratitis capitata]	-	-	-	-	-	GO:0070011//peptidase activity, acting on L-amino acid peptides	GO:0019538//protein metabolic process
LOC105230418	1145	902	704	1177	917	4192	6940	4040	3991	4211	125.94	99.46	98.26	157.17	110.49	431.03	650.57	485.54	462.03	461.55	118.264	498.144	2.07455	1.17575e-40	7.37534e-39	--	PREDICTED: venom peptide HsVx1-like [Ceratitis capitata]	-	-	-	-	-	-	-
LOC105231877	216	219	172	159	214	37	50	48	42	65	6.68	6.78	6.74	5.96	7.28	1.09	1.33	1.62	1.36	2.01	6.688	1.482	-2.17403	3.50028e-40	2.17383e-38	CRISP3	PREDICTED: cysteine-rich secretory protein LCCL domain-containing 2 isoform X1 [Bactrocera dorsalis]	-	-	-	-	-	-	-
LOC105227781	24	43	29	11	52	351	521	337	348	362	0.67	1.2	1.02	0.37	1.59	9.13	12.36	10.25	10.19	10.04	0.97	10.394	3.42162	1.05719e-39	6.53309e-38	PPO2	PREDICTED: phenoloxidase 2-like [Bactrocera dorsalis]	-	-	-	-	-	-	-
LOC105229550	1574	1596	1589	1298	1953	556	733	610	489	505	47.81	48.6	61.24	47.86	64.99	15.79	18.98	20.25	15.63	15.29	54.1	17.188	-1.65423	1.16001e-39	7.13318e-38	UGT2A1	PREDICTED: UDP-glucuronosyltransferase 1-6 [Bactrocera dorsalis]	Metabolism;Metabolism;Metabolism;Metabolism;Human Diseases;Metabolism;Organismal Systems;Metabolism;Metabolism;Metabolism;Metabolism	Global and overview maps;Xenobiotics biodegradation and metabolism;Xenobiotics biodegradation and metabolism;Xenobiotics biodegradation and metabolism;Cancers;Carbohydrate metabolism;Digestive system;Metabolism of cofactors and vitamins;Metabolism of cofactors and vitamins;Carbohydrate metabolism;Lipid metabolism	ko01100//Metabolic pathways;ko00983//Drug metabolism - other enzymes;ko00980//Metabolism of xenobiotics by cytochrome P450;ko00982//Drug metabolism - cytochrome P450;ko05204//Chemical carcinogenesis;ko00040//Pentose and glucuronate interconversions;ko04976//Bile secretion;ko00860//Porphyrin and chlorophyll metabolism;ko00830//Retinol metabolism;ko00053//Ascorbate and aldarate metabolism;ko00140//…	K00699;K00699;K00699;K00699;K00699;K00699;K00699;K00699;K00699;K00699;K00699	-	GO:0016757//transferase activity, transferring glycosyl groups	-
LOC105232734	245	475	870	336	475	27	28	17	11	12	22.48	43.69	101.3	37.43	47.75	2.32	2.19	1.7	1.06	1.1	50.53	1.674	-4.91577	1.42934e-38	8.61956e-37	CP12	PREDICTED: endocuticle structural protein SgAbd-6 [Bactrocera dorsalis]	-	-	-	-	-	-	-
LOC105222009	17245	17597	12830	16016	14792	34518	44866	38481	34645	35736	297.37	304.17	280.72	335.28	279.42	556.4	659.34	725.03	628.77	614.05	299.392	636.718	1.08862	1.93222e-38	1.15961e-36	GlyP	PREDICTED: glycogen phosphorylase [Bactrocera dorsalis]	Metabolism;Organismal Systems;Organismal Systems;Human Diseases;Cellular Processes;Metabolism	Global and overview maps;Endocrine system;Endocrine system;Endocrine and metabolic diseases;Cell growth and death;Carbohydrate metabolism	ko01100//Metabolic pathways;ko04910//Insulin signaling pathway;ko04922//Glucagon signaling pathway;ko04931//Insulin resistance;ko04217//Necroptosis;ko00500//Starch and sucrose metabolism	K00688;K00688;K00688;K00688;K00688;K00688	GO:0032991//macromolecular complex	GO:0004645//phosphorylase activity;GO:0043168//anion binding;GO:0046983//protein dimerization activity	GO:0005981//regulation of glycogen catabolic process;GO:0010259//multicellular organism aging;GO:0031348//negative regulation of defense response;GO:0040011//locomotion;GO:0042742//defense response to bacterium
LOC105232747	293	338	172	272	219	1077	1305	756	963	1167	20.97	24.25	15.62	23.63	17.17	72.05	79.59	59.11	72.53	83.22	20.328	73.3	1.85034	4.05996e-38	2.4249e-36	Lcp65Ag2	PREDICTED: larval cuticle protein 8-like [Bactrocera dorsalis]	-	-	-	-	-	GO:0005214//structural constituent of chitin-based cuticle	GO:0042335//cuticle development;GO:0051234//establishment of localization
LOC105231090	356	283	292	285	286	72	41	21	28	25	39.85	31.77	41.39	38.68	35.05	7.53	3.89	2.53	3.34	2.77	37.348	4.012	-3.21864	4.58159e-38	2.72343e-36	--	PREDICTED: metallothionein-1-like [Bactrocera dorsalis]	-	-	-	-	-	-	-
LOC105233400	35	39	19	21	28	169	177	171	148	205	1.5	1.67	1.03	1.09	1.31	6.76	6.46	8	6.67	8.74	1.32	7.326	2.47249	7.43406e-38	4.39807e-36	--	GL16596 [Drosophila persimilis]	-	-	-	-	-	-	-
LOC105225382	1949	2284	1421	1729	1957	4024	4626	3972	4159	4435	29.99	35.23	27.75	32.3	32.99	57.88	60.67	66.78	67.36	68	31.652	64.138	1.01888	7.78794e-38	4.5857e-36	-	-	-	-	-	-	-	-	-
LOC105233874	123	145	163	122	192	15	9	10	6	19	6.64	7.85	11.17	8	11.36	0.76	0.41	0.59	0.34	1.02	9.004	0.624	-3.85095	8.83734e-38	5.17918e-36	LCP22	PREDICTED: endocuticle structural glycoprotein ABD-4 [Bactrocera dorsalis]	-	-	-	-	-	-	-
LOC105232281	124	114	98	167	107	4	5	5	7	3	2.89	2.63	2.89	4.72	2.75	0.09	0.1	0.13	0.17	0.07	3.176	0.112	-4.82564	8.91488e-38	5.20021e-36	--	PREDICTED: skin secretory protein xP2 isoform X1 [Bactrocera dorsalis]	-	-	-	-	-	-	-
LOC105226103	144	192	165	164	177	34	34	15	16	13	2.55	3.41	3.7	3.52	3.43	0.56	0.51	0.29	0.3	0.23	3.322	0.378	-3.13559	1.06058e-37	6.15777e-36	Pxt	PREDICTED: peroxidase [Bactrocera dorsalis]	-	-	-	-	-	GO:0046906//tetrapyrrole binding	GO:0006950//response to stress;GO:0044710//single-organism metabolic process
LOC105228743	2194	1954	1154	2291	1479	7845	8499	7677	7527	8767	71.46	63.8	47.69	90.59	52.77	238.85	235.92	273.21	258.03	284.54	65.262	258.11	1.98367	1.21226e-37	7.00583e-36	Ttpal	PREDICTED: alpha-tocopherol transfer protein-like [Bactrocera dorsalis]	-	-	-	-	GO:0044464//cell part	-	GO:0051234//establishment of localization
LOC105226135	1047	1731	1125	899	1399	4771	7419	6034	6081	8800	49.25	81.62	67.15	51.34	72.09	209.79	297.41	310.12	301.06	412.48	64.29	306.172	2.25168	1.39192e-37	8.00708e-36	miox	PREDICTED: inositol oxygenase [Bactrocera dorsalis]	Metabolism;Metabolism	Carbohydrate metabolism;Carbohydrate metabolism	ko00562//Inositol phosphate metabolism;ko00053//Ascorbate and aldarate metabolism	K00469;K00469	GO:0044424//intracellular part	GO:0016701//oxidoreductase activity, acting on single donors with incorporation of molecular oxygen	GO:0006020//inositol metabolic process
LOC105225918	750	836	597	615	646	1717	2365	1353	1723	1887	11.29	12.87	11.22	11.28	10.98	23.64	30.02	22.21	26.73	28.47	11.528	26.214	1.1852	2.1533e-37	1.2218e-35	--	PREDICTED: uncharacterized protein LOC105225918 [Bactrocera dorsalis]	-	-	-	-	-	-	-
LOC105222808	409	450	361	328	383	924	1304	909	892	880	21.28	23.47	23.83	20.71	21.83	44.93	57.81	51.67	48.84	45.62	22.224	49.774	1.16327	3.52511e-37	1.98216e-35	Galt	PREDICTED: probable galactose-1-phosphate uridylyltransferase [Bactrocera dorsalis]	Metabolism;Metabolism;Metabolism;Organismal Systems	Global and overview maps;Carbohydrate metabolism;Carbohydrate metabolism;Endocrine system	ko01100//Metabolic pathways;ko00520//Amino sugar and nucleotide sugar metabolism;ko00052//Galactose metabolism;ko04917//Prolactin signaling pathway	K00965;K00965;K00965;K00965	-	GO:0046914//transition metal ion binding;GO:0070569//uridylyltransferase activity	GO:0019318//hexose metabolic process
LOC105232755	151	141	135	203	169	15	2	11	8	13	4.47	4.15	4.97	7	5.42	0.35	0.05	0.29	0.2	0.35	5.202	0.248	-4.39065	4.07891e-36	2.21379e-34	l(3)mbn	Protein lethal(3)malignant blood neoplasm 1, partial [Bactrocera dorsalis]	-	-	-	-	-	-	-
LOC105230478	471	443	386	442	436	1110	1468	946	956	1018	4.96	4.68	5.16	5.65	5.03	10.93	13.18	10.89	10.6	10.69	5.096	11.258	1.14351	5.53411e-36	2.96491e-34	Npr1	PREDICTED: atrial natriuretic peptide receptor 1 isoform X1 [Bactrocera dorsalis]	Organismal Systems;Metabolism;Environmental Information Processing;Organismal Systems;Environmental Information Processing;Organismal Systems;Organismal Systems;Organismal Systems;Organismal Systems	Environmental adaptation;Nucleotide metabolism;Signal transduction;Endocrine system;Signal transduction;Circulatory system;Endocrine system;Endocrine system;Endocrine system	ko04714//Thermogenesis;ko00230//Purine metabolism;ko04024//cAMP signaling pathway;ko04921//Oxytocin signaling pathway;ko04022//cGMP - PKG signaling pathway;ko04270//Vascular smooth muscle contraction;ko04925//Aldosterone synthesis and secretion;ko04924//Renin secretion;ko04923//Regulation of lipolysis in adipocyte	K12323;K12323;K12323;K12323;K12323;K12323;K12323;K12323;K12323	GO:0031224//intrinsic component of membrane	GO:0009975//cyclase activity;GO:0016301//kinase activity;GO:0016829//lyase activity;GO:0032550//purine ribonucleoside binding	GO:0006464//cellular protein modification process;GO:0007165//signal transduction;GO:0009152//purine ribonucleotide biosynthetic process
LOC105229573	128	162	83	132	169	507	561	479	450	488	4.01	5.09	3.3	5.02	5.8	14.85	14.98	16.4	14.84	15.24	4.644	15.262	1.7165	1.21404e-35	6.42153e-34	SLC22A8	PREDICTED: organic cation transporter protein [Bactrocera dorsalis]	-	-	-	-	GO:0031224//intrinsic component of membrane	GO:0005215//transporter activity	GO:0044763//single-organism cellular process
LOC105225825	15925	11334	10122	8488	12675	2491	2472	3867	2577	2859	614.22	438.2	495.37	397.43	535.54	89.81	81.26	162.96	104.61	109.88	496.152	109.704	-2.17717	1.69633e-35	8.93474e-34	wat	PREDICTED: fatty acyl-CoA reductase wat [Bactrocera dorsalis]	Cellular Processes;Organismal Systems;Metabolism	Transport and catabolism;Aging;Lipid metabolism	ko04146//Peroxisome;ko04212//Longevity regulating pathway - worm;ko00073//Cutin, suberine and wax biosynthesis	K13356;K13356;K13356	-	-	-
LOC105233910	1071	699	1101	527	774	212	178	144	124	132	24.81	16.23	32.37	14.82	19.64	4.59	3.51	3.65	3.02	3.05	21.574	3.564	-2.59772	1.77928e-35	9.33226e-34	Cyp4c3	PREDICTED: cytochrome P450 4c3 [Bactrocera dorsalis]	-	-	-	-	-	GO:0016491//oxidoreductase activity;GO:0046906//tetrapyrrole binding;GO:0046914//transition metal ion binding	GO:0030908//protein splicing;GO:0044710//single-organism metabolic process
LOC105223158	481	557	539	288	627	94	139	90	79	68	19.13	22.2	27.2	13.9	27.31	3.49	4.71	3.91	3.31	2.69	21.948	3.622	-2.59923	2.15801e-35	1.12243e-33	CYTB5-B	PREDICTED: cytochrome b5 [Bactrocera dorsalis]	-	-	-	-	-	GO:0005488//binding	-
LOC105223676	279	222	140	226	162	761	817	658	680	780	14.54	11.59	9.26	14.29	9.25	37.06	36.28	37.46	37.29	40.5	11.786	37.718	1.67818	4.43058e-35	2.2949e-33	Yp3	PREDICTED: vitellogenin-3-like [Bactrocera dorsalis]	-	-	-	-	-	GO:0016788//hydrolase activity, acting on ester bonds	-
LOC105223010	4079	4768	3124	4066	3637	8745	10966	7906	8463	9276	39.11	45.78	37.8	47.09	38.42	78.37	89.41	82.4	84.79	88.93	41.64	84.78	1.02575	1.05925e-34	5.4414e-33	Abca13	PREDICTED: ATP-binding cassette sub-family A member 13 [Bactrocera dorsalis]	-	-	-	-	GO:0031224//intrinsic component of membrane	GO:0017111//nucleoside-triphosphatase activity;GO:0032550//purine ribonucleoside binding	GO:0051234//establishment of localization
LOC105224549	336	412	335	395	697	13	51	18	28	46	16.61	20.41	21.01	23.7	37.74	0.6	2.15	0.97	1.46	2.27	23.894	1.49	-4.00326	5.47284e-34	2.78847e-32	--	PREDICTED: pro-resilin [Bactrocera dorsalis]	-	-	-	-	-	GO:0005214//structural constituent of chitin-based cuticle	GO:0042335//cuticle development
LOC105227883	71	58	70	52	79	271	297	245	244	208	4.69	3.84	5.86	4.17	5.71	16.72	16.7	17.67	16.95	13.68	4.854	16.344	1.75152	5.54357e-34	2.81302e-32	SDR-1	PREDICTED: farnesol dehydrogenase-like [Bactrocera dorsalis]	-	-	-	-	-	-	-
LOC105226558	16	16	7	9	14	166	112	159	129	119	0.65	0.65	0.36	0.44	0.62	6.29	3.87	7.04	5.5	4.81	0.544	5.502	3.33828	6.08108e-34	3.07328e-32	Ttpa	PREDICTED: alpha-tocopherol transfer protein-like [Bactrocera dorsalis]	-	-	-	-	GO:0044464//cell part	-	GO:0051234//establishment of localization
LOC105225791	1029	1192	917	1078	1145	2435	3044	2453	2149	2593	123.54	143.45	139.75	157.24	150.71	273.38	311.58	321.85	271.62	310.33	142.938	297.752	1.05872	6.69941e-34	3.37212e-32	--	PREDICTED: sarcocystatin-A [Bactrocera dorsalis]	-	-	-	-	-	-	-
LOC105226928	819	977	830	678	756	424	468	387	420	450	6.32	7.55	8.12	6.35	6.38	3.06	3.08	3.27	3.41	3.46	6.944	3.256	-1.09267	8.8509e-34	4.41943e-32	Nfat5	PREDICTED: nuclear factor of activated T-cells 5 isoform X1 [Bactrocera dorsalis]	-	-	-	-	-	-	-
LOC105222327	428	395	273	248	459	1136	1776	1471	1236	1352	20.29	18.77	16.42	14.27	23.84	50.35	71.77	76.21	61.68	63.88	18.718	64.778	1.79108	4.54871e-33	2.2094e-31	GLO5	PREDICTED: peroxisomal (S)-2-hydroxy-acid oxidase GLO5 [Bactrocera dorsalis]	Metabolism;Metabolism;Cellular Processes;Metabolism	Global and overview maps;Global and overview maps;Transport and catabolism;Carbohydrate metabolism	ko01100//Metabolic pathways;ko01200//Carbon metabolism;ko04146//Peroxisome;ko00630//Glyoxylate and dicarboxylate metabolism	K11517;K11517;K11517;K11517	-	GO:0003824//catalytic activity;GO:0032553//ribonucleotide binding	GO:0044710//single-organism metabolic process
LOC105226111	2977	1953	2102	1977	1737	6176	9838	7603	7088	8760	90.98	59.83	81.51	73.35	58.15	176.43	256.22	253.87	227.98	266.76	72.764	236.252	1.69903	5.78955e-33	2.77965e-31	Alp-m	PREDICTED: alkaline phosphatase [Bactrocera dorsalis]	Metabolism;Metabolism;Metabolism	Global and overview maps;Metabolism of cofactors and vitamins;Metabolism of cofactors and vitamins	ko01100//Metabolic pathways;ko00790//Folate biosynthesis;ko00730//Thiamine metabolism	K01077;K01077;K01077	-	GO:0016791//phosphatase activity	GO:0006796//phosphate-containing compound metabolic process
LOC105226078	159	210	90	97	119	599	719	873	706	831	5.48	7.26	3.94	4.06	4.49	19.31	21.13	32.89	25.62	28.55	5.046	25.5	2.33729	1.15154e-32	5.44495e-31	Snmp1	PREDICTED: sensory neuron membrane protein 1 [Bactrocera dorsalis]	-	-	-	-	-	-	-
LOC105231913	650	689	589	582	581	1300	1597	1369	1626	1473	8.32	8.84	9.57	9.05	8.15	15.56	17.43	19.16	21.92	18.8	8.786	18.574	1.08001	2.54169e-32	1.19278e-30	Syx1A	PREDICTED: syntaxin-1A [Bactrocera dorsalis]	Organismal Systems;Organismal Systems;Human Diseases;Genetic Information Processing	Endocrine system;Nervous system;Substance dependence;Folding, sorting and degradation	ko04911//Insulin secretion;ko04721//Synaptic vesicle cycle;ko05031//Amphetamine addiction;ko04130//SNARE interactions in vesicular transport	K04560;K04560;K04560;K04560	GO:0031224//intrinsic component of membrane	GO:0005515//protein binding	GO:0015031//protein transport;GO:0060627//regulation of vesicle-mediated transport;GO:0061024//membrane organization
LOC105230815	8	7	9	14	1	137	131	90	106	112	0.18	0.16	0.26	0.39	0.03	2.92	2.55	2.25	2.55	2.55	0.204	2.564	3.65176	4.18587e-32	1.95701e-30	Ir21a	PREDICTED: ionotropic receptor 21a [Bactrocera dorsalis]	-	-	-	-	-	-	GO:0007215//glutamate receptor signaling pathway
LOC105229054	4145	3836	2769	3271	2522	9560	14843	8583	11473	9557	35.28	32.73	29.9	33.8	23.51	76.06	107.66	79.81	102.77	81.05	31.044	89.47	1.52709	1.11498e-31	5.17407e-30	slc16a12	PREDICTED: monocarboxylate transporter 14 [Bactrocera dorsalis]	-	-	-	-	GO:0031224//intrinsic component of membrane	-	GO:0044763//single-organism cellular process
LOC105232911	19	41	17	48	18	526	679	265	414	828	2.42	5.23	2.75	7.42	2.51	62.62	73.7	36.88	55.5	105.08	4.066	66.756	4.03722	1.17812e-31	5.44684e-30	--	GH15280 [Drosophila grimshawi]	-	-	-	-	-	-	-
LOC105224325	8	20	9	26	19	184	388	215	183	256	0.5	1.26	0.72	1.98	1.31	10.8	20.75	14.74	12.09	16.01	1.154	14.878	3.68847	2.09581e-31	9.65387e-30	TM_0325	PREDICTED: uncharacterized oxidoreductase TM_0325-like [Bactrocera oleae]	-	-	-	-	-	-	-
LOC105222634	879	557	437	926	589	3592	3891	2646	3187	3833	23.88	15.2	15.08	30.6	17.56	91.35	90.27	78.68	91.23	103.95	20.464	91.096	2.1543	2.85815e-31	1.3117e-29	AGAP009593	PREDICTED: carboxypeptidase B [Bactrocera dorsalis]	-	-	-	-	-	GO:0008235//metalloexopeptidase activity;GO:0046914//transition metal ion binding	GO:0019538//protein metabolic process
LOC105222679	368	268	283	302	294	758	974	637	758	796	7.22	5.27	7.04	7.19	6.32	13.89	16.28	13.65	15.64	15.55	6.608	15.002	1.18287	7.59072e-31	3.40845e-29	--	CG40439 [Drosophila busckii]	-	-	-	-	-	-	-
LOC112694761	187	160	203	137	223	31	49	27	43	26	3.77	3.23	5.19	3.35	4.92	0.58	0.84	0.59	0.91	0.52	4.092	0.688	-2.57233	9.24806e-31	4.13776e-29	Cyp309a1	PREDICTED: probable cytochrome P450 309a1 [Bactrocera dorsalis]	-	-	-	-	-	GO:0005488//binding;GO:0016491//oxidoreductase activity	-
LOC105233859	286	303	285	260	366	109	111	99	118	78	9.51	10.1	12.03	10.5	13.34	3.39	3.15	3.6	4.13	2.59	11.096	3.372	-1.71836	1.05762e-30	4.71511e-29	--	PREDICTED: transcription factor SPT20 homolog [Bactrocera dorsalis]	-	-	-	-	-	-	-
LOC105222249	5666	5274	6021	4198	5898	2809	3012	2588	2551	2820	158.34	147.74	213.49	142.41	180.56	73.37	71.75	79.02	75.03	78.52	168.508	75.538	-1.15754	1.15904e-30	5.14886e-29	NARS	PREDICTED: asparagine--tRNA ligase, cytoplasmic [Bactrocera dorsalis]	Genetic Information Processing	Translation	ko00970//Aminoacyl-tRNA biosynthesis	K01893	GO:0044424//intracellular part	GO:0004812//aminoacyl-tRNA ligase activity;GO:0032550//purine ribonucleoside binding	GO:0006418//tRNA aminoacylation for protein translation
LOC105229031	1067	1146	777	1223	1170	2909	3314	2859	2704	3141	55.42	59.66	51.21	77.11	66.57	141.23	146.69	162.24	147.81	162.56	61.994	152.106	1.29488	1.23762e-30	5.47844e-29	Hsp27	PREDICTED: heat shock protein 27 [Bactrocera dorsalis]	-	-	-	-	-	-	-
LOC105230754	31847	32899	27023	20898	32899	16150	17007	16211	14931	15024	977.19	1006.28	1051.2	783.25	1101.89	467.39	448.83	546.96	485.94	463.19	983.962	482.462	-1.02819	1.98052e-30	8.70523e-29	Sam-S	PREDICTED: S-adenosylmethionine synthase isoform X1 [Bactrocera dorsalis]	Metabolism;Metabolism;Metabolism	Global and overview maps;Global and overview maps;Amino acid metabolism	ko01100//Metabolic pathways;ko01230//Biosynthesis of amino acids;ko00270//Cysteine and methionine metabolism	K00789;K00789;K00789	-	GO:0016765//transferase activity, transferring alkyl or aryl (other than methyl) groups;GO:0032550//purine ribonucleoside binding;GO:0043169//cation binding	GO:0009108//coenzyme biosynthetic process
LOC105225134	391	443	319	393	466	186	165	131	171	188	7.65	8.6	8.02	9.39	10	3.44	2.76	2.8	3.6	3.63	8.732	3.246	-1.42765	3.19146e-30	1.3833e-28	--	PREDICTED: zinc finger CCCH domain-containing protein 18 isoform X3 [Bactrocera dorsalis]	-	-	-	-	-	-	-
LOC109579470	1517	1908	1146	1505	1664	3438	4209	3528	3619	4011	100.12	126.23	95.97	120.58	120.3	212.1	236.74	254.4	251.38	263.78	112.64	243.68	1.11327	5.12771e-30	2.1921e-28	--	PREDICTED: uncharacterized protein LOC101463198 [Ceratitis capitata]	-	-	-	-	-	-	-
LOC105222598	13939	11447	8098	14058	12032	35583	43841	43082	35937	40612	957.65	788.34	705.97	1172.5	905.56	2285.21	2566.95	3234.03	2598.58	2780.36	906.004	2693.03	1.57164	6.94853e-30	2.96036e-28	Cyp6g1	PREDICTED: cytochrome P450 6g1-like [Bactrocera dorsalis]	-	-	-	-	-	GO:0016491//oxidoreductase activity;GO:0046906//tetrapyrrole binding	GO:0044710//single-organism metabolic process
LOC105226235	1315	1121	776	805	884	2836	2854	1809	2363	2528	41.81	35.73	31.31	31.07	30.79	84.29	77.33	62.84	79.07	80.09	34.142	76.724	1.16813	9.39623e-30	3.98956e-28	Slc17a5	PREDICTED: LOW QUALITY PROTEIN: putative inorganic phosphate cotransporter [Bactrocera dorsalis]	-	-	-	-	-	-	-
LOC105224317	317	232	263	212	317	833	1190	836	844	712	18.21	13.08	19.29	15.01	20.09	45.93	59.45	53.83	52.32	42.02	17.136	50.71	1.56524	1.30412e-29	5.51842e-28	RGN	PREDICTED: regucalcin isoform X1 [Bactrocera dorsalis]	-	-	-	-	-	-	-
LOC105227212	335	268	272	206	339	104	107	104	86	109	8.9	7.28	9.31	6.63	9.9	2.78	2.41	3.11	2.42	3.22	8.404	2.788	-1.59185	1.52377e-29	6.42611e-28	AGXT2	PREDICTED: alanine--glyoxylate aminotransferase 2, mitochondrial isoform X1 [Bactrocera dorsalis]	Metabolism;Metabolism;Metabolism;Metabolism;Metabolism	Global and overview maps;Amino acid metabolism;Amino acid metabolism;Amino acid metabolism;Amino acid metabolism	ko01100//Metabolic pathways;ko00270//Cysteine and methionine metabolism;ko00280//Valine, leucine and isoleucine degradation;ko00260//Glycine, serine and threonine metabolism;ko00250//Alanine, aspartate and glutamate metabolism	K00827;K00827;K00827;K00827;K00827	-	-	-
LOC105227880	285	389	292	277	355	133	126	124	127	144	8.59	11.75	11.17	10.13	11.72	3.75	3.24	4.08	4.03	4.32	10.672	3.884	-1.45822	1.58802e-29	6.67452e-28	mfsd8	PREDICTED: major facilitator superfamily domain-containing protein 8 [Bactrocera dorsalis]	Cellular Processes	Transport and catabolism	ko04142//Lysosome	K12307	-	-	GO:0044763//single-organism cellular process
LOC105225577	1531	1277	1137	1306	1377	663	842	576	780	678	19.08	15.46	17.61	19.24	18.49	7.78	8.64	7.71	10.2	8.16	17.976	8.498	-1.08088	1.59882e-29	6.69733e-28	Pdk1	PREDICTED: 3-phosphoinositide-dependent protein kinase 1 isoform X1 [Bactrocera dorsalis]	Human Diseases;Environmental Information Processing;Environmental Information Processing;Cellular Processes;Cellular Processes;Organismal Systems;Environmental Information Processing;Organismal Systems;Human Diseases;Environmental Information Processing;Cellular Processes;Environmental Information Processing;Human Diseases;Human Diseases;Human Diseases;Organismal Systems;Organismal Systems;Human …	Cancers;Signal transduction;Signal transduction;Transport and catabolism;Cellular community - eukaryotes;Endocrine system;Signal transduction;Endocrine system;Cancers;Signal transduction;Cell growth and death;Signal transduction;Cancers;Endocrine and metabolic diseases;Drug resistance;Nervous system;Endocrine system;Infectious diseases;Immune system;Cancers;Immune system;Infectious diseases;Excre…	ko05205//Proteoglycans in cancer;ko04150//mTOR signaling pathway;ko04151//PI3K-Akt signaling pathway;ko04140//Autophagy - animal;ko04510//Focal adhesion;ko04919//Thyroid hormone signaling pathway;ko04071//Sphingolipid signaling pathway;ko04910//Insulin signaling pathway;ko05215//Prostate cancer;ko04068//FoxO signaling pathway;ko04210//Apoptosis;ko04152//AMPK signaling pathway;ko05231//Choline met…	K06276;K06276;K06276;K06276;K06276;K06276;K06276;K06276;K06276;K06276;K06276;K06276;K06276;K06276;K06276;K06276;K06276;K06276;K06276;K06276;K06276;K06276;K06276;K06276	-	GO:0004672//protein kinase activity;GO:0032550//purine ribonucleoside binding	GO:0006464//cellular protein modification process;GO:0006796//phosphate-containing compound metabolic process
LOC105222945	565	588	541	508	582	261	377	233	241	289	20.07	20.94	24.42	21.92	22.65	8.71	11.44	9.04	9.01	10.24	22	9.688	-1.18323	1.66724e-29	6.93739e-28	--	PREDICTED: uncharacterized protein LOC105222945 isoform X1 [Bactrocera dorsalis]	-	-	-	-	-	-	-
LOC105224837	112	166	132	116	191	10	7	6	6	23	7.71	11.46	11.53	9.7	14.41	0.64	0.41	0.45	0.43	1.58	10.962	0.702	-3.9649	1.78756e-29	7.41332e-28	--	PREDICTED: cuticle protein 38-like [Bactrocera dorsalis]	-	-	-	-	-	-	-
LOC105227008	1316	2014	1120	1243	1190	3646	5037	3773	3747	4526	35.68	54.73	38.53	40.91	35.34	92.4	116.38	111.76	106.92	122.27	41.038	109.946	1.42176	2.72665e-29	1.12332e-27	Alp4	PREDICTED: alkaline phosphatase 4 [Bactrocera dorsalis]	Metabolism;Metabolism;Metabolism	Global and overview maps;Metabolism of cofactors and vitamins;Metabolism of cofactors and vitamins	ko01100//Metabolic pathways;ko00790//Folate biosynthesis;ko00730//Thiamine metabolism	K01077;K01077;K01077	-	GO:0016791//phosphatase activity	GO:0006796//phosphate-containing compound metabolic process
LOC109579350	167	121	125	175	111	518	652	487	449	502	13.16	9.56	12.5	16.74	9.58	38.16	43.79	41.94	37.24	39.43	12.308	40.112	1.70444	3.82815e-29	1.56166e-27	HPN	PREDICTED: venom serine protease-like, partial [Bactrocera dorsalis]	-	-	-	-	-	GO:0004175//endopeptidase activity	GO:0019538//protein metabolic process
LOC105222901	1056	1334	870	844	934	2367	3124	1861	2297	2373	10.7	13.68	11.23	10.47	10.48	22.5	27.02	20.71	24.6	24.42	11.312	23.85	1.07614	6.93245e-29	2.80058e-27	kidins220b	PREDICTED: kinase D-interacting substrate of 220 kDa isoform X1 [Bactrocera dorsalis]	-	-	-	-	-	-	-
LOC105233746	69	77	88	53	62	342	316	366	323	250	10.34	11.57	16.73	9.64	10.18	47.91	40.36	59.93	50.94	37.33	11.692	47.294	2.01614	7.79306e-29	3.13809e-27	ANPEP	PREDICTED: aminopeptidase N-like [Bactrocera dorsalis]	Organismal Systems	Endocrine system	ko04614//Renin-angiotensin system	K11141	-	-	-
LOC105223657	243	220	240	197	222	36	78	53	45	72	5.14	4.67	6.45	5.06	5.15	0.71	1.41	1.23	1	1.52	5.294	1.174	-2.17293	1.12636e-28	4.47782e-27	Skeletor	PREDICTED: protein Skeletor, isoforms B/C [Bactrocera dorsalis]	-	-	-	-	-	-	-
LOC105228495	820	951	767	643	894	155	163	205	112	62	55.06	64.01	65.35	52.42	65.76	9.73	9.33	15.04	7.92	4.15	60.52	9.234	-2.71238	1.86804e-28	7.33295e-27	Dh31	PREDICTED: diuretic hormone class 2 [Bactrocera dorsalis]	-	-	-	-	-	-	-
LOC105234261	53992	37636	30945	29233	45970	13264	14190	17166	12877	13734	966.48	675.33	702.87	635.26	901.45	221.95	216.48	335.74	242.6	244.98	776.278	252.35	-1.62115	2.04786e-28	8.01364e-27	Cyp4g1	Cytochrome P450 4g1 [Bactrocera dorsalis]	-	-	-	-	-	GO:0016491//oxidoreductase activity;GO:0046906//tetrapyrrole binding;GO:0046914//transition metal ion binding	GO:0044710//single-organism metabolic process
LOC105229768	132	450	220	162	385	3032	5567	3663	3383	3283	4.83	16.5	10.21	7.19	15.43	103.69	173.56	146.42	130.26	119.68	10.832	134.722	3.63661	2.59091e-28	1.00755e-26	ACHE1	PREDICTED: bile salt-activated lipase [Bactrocera dorsalis]	Metabolism;Organismal Systems	Lipid metabolism;Nervous system	ko00564//Glycerophospholipid metabolism;ko04725//Cholinergic synapse	K01049;K01049	-	-	-
LOC105229065	2687	1987	1594	2051	1743	6943	8585	4603	5630	5192	111.18	82.42	83.69	103.03	79.01	268.56	302.75	208.11	245.19	214.08	91.866	247.738	1.43121	2.62563e-28	1.01788e-26	CG1139	PREDICTED: proton-coupled amino acid transporter-like protein CG1139 [Bactrocera dorsalis]	Organismal Systems	Digestive system	ko04974//Protein digestion and absorption	K14209	GO:0031224//intrinsic component of membrane	-	-
LOC105231032	2541	3446	1759	3243	2679	8751	12837	10657	8887	9566	273.96	372.43	240.64	424.47	316.42	881.97	1179.53	1255.44	1008.46	1027.73	325.584	1070.63	1.71735	7.0651e-28	2.69705e-26	Obp99a	PREDICTED: general odorant-binding protein 99a [Bactrocera dorsalis]	-	-	-	-	-	-	-
LOC105227684	49	99	41	54	31	367	610	407	358	326	4.29	8.69	4.56	5.74	2.97	30.05	45.53	38.97	32.98	28.43	5.25	35.192	2.74486	1.07096e-27	4.03891e-26	--	PREDICTED: uncharacterized protein LOC105227684 [Bactrocera dorsalis]	-	-	-	-	-	GO:0016740//transferase activity	GO:0006796//phosphate-containing compound metabolic process
LOC105233442	276	188	189	168	258	64	65	73	46	52	20.92	14.28	18.18	15.46	21.42	4.53	4.2	6.05	3.67	3.93	18.052	4.476	-2.01188	1.09493e-27	4.11687e-26	AAEL008004	Elongation of very long chain fatty acids protein 1 [Bactrocera dorsalis]	-	-	-	-	GO:0016020//membrane	-	GO:0006631//fatty acid metabolic process
LOC105230669	628	587	529	388	539	293	284	241	278	297	27.89	26.14	29.81	20.92	26.23	12.17	10.75	11.7	13	13.15	26.198	12.154	-1.10803	1.10537e-27	4.14366e-26	RnrS	PREDICTED: ribonucleoside-diphosphate reductase subunit M2 [Bactrocera dorsalis]	Metabolism;Metabolism;Metabolism;Metabolism;Metabolism;Cellular Processes	Global and overview maps;Nucleotide metabolism;Xenobiotics biodegradation and metabolism;Nucleotide metabolism;Metabolism of other amino acids;Cell growth and death	ko01100//Metabolic pathways;ko00230//Purine metabolism;ko00983//Drug metabolism - other enzymes;ko00240//Pyrimidine metabolism;ko00480//Glutathione metabolism;ko04115//p53 signaling pathway	K10808;K10808;K10808;K10808;K10808;K10808	GO:0044444//cytoplasmic part	GO:0016728//oxidoreductase activity, acting on CH or CH2 groups, disulfide as acceptor	GO:0006259//DNA metabolic process;GO:0009132//nucleoside diphosphate metabolic process;GO:0030154//cell differentiation;GO:0043280//positive regulation of cysteine-type endopeptidase activity involved in apoptotic process
LOC105230162	325	488	410	217	338	111	89	84	90	75	12.18	18.34	19.5	9.87	13.88	3.89	2.84	3.44	3.55	2.8	14.754	3.304	-2.15882	1.38915e-27	5.17634e-26	FMOGS-OX5	PREDICTED: flavin-containing monooxygenase FMO GS-OX5 [Bactrocera dorsalis]	-	-	-	-	GO:0043231//intracellular membrane-bounded organelle;GO:0044444//cytoplasmic part	GO:0000166//nucleotide binding;GO:0016709//oxidoreductase activity, acting on paired donors, with incorporation or reduction of molecular oxygen, NAD(P)H as one donor, and incorporation of one atom of oxygen	GO:0044710//single-organism metabolic process
LOC105233006	1263	1200	800	1050	1012	2446	3260	2188	2129	2236	74.34	70.81	59.75	75.03	65.26	134.59	163.54	140.72	131.89	131.15	69.038	140.378	1.02385	1.52826e-27	5.67774e-26	swi2	PREDICTED: protein singed wings 2 [Bactrocera dorsalis]	-	-	-	-	-	-	-
LOC105232933	42	52	40	25	51	174	250	211	175	168	1.89	2.35	2.29	1.37	2.52	7.33	9.6	10.39	8.3	7.54	2.084	8.632	2.05034	1.63181e-27	6.04448e-26	-	-	-	-	-	-	-	-	-
LOC105222926	45524	43212	30143	34591	26938	104032	140239	77777	92646	96228	1143.71	1087.92	960.59	1054.35	740.77	2443.76	3004.15	2135.38	2450.15	2409.88	997.468	2488.66	1.31903	1.67173e-27	6.17404e-26	Gdh	PREDICTED: glutamate dehydrogenase, mitochondrial isoform X1 [Bactrocera dorsalis]	Metabolism;Metabolism;Cellular Processes;Metabolism;Metabolism;Metabolism;Organismal Systems;Metabolism	Global and overview maps;Global and overview maps;Cell growth and death;Amino acid metabolism;Energy metabolism;Amino acid metabolism;Excretory system;Metabolism of other amino acids	ko01100//Metabolic pathways;ko01200//Carbon metabolism;ko04217//Necroptosis;ko00250//Alanine, aspartate and glutamate metabolism;ko00910//Nitrogen metabolism;ko00220//Arginine biosynthesis;ko04964//Proximal tubule bicarbonate reclamation;ko00471//D-Glutamine and D-glutamate metabolism	K00261;K00261;K00261;K00261;K00261;K00261;K00261;K00261	-	GO:0003824//catalytic activity	GO:0044710//single-organism metabolic process
LOC105227741	499	574	472	436	575	241	338	240	266	257	10.69	12.33	12.83	11.34	13.5	4.83	6.17	5.62	6	5.49	12.138	5.622	-1.11038	4.02957e-27	1.47944e-25	NAGA	PREDICTED: LOW QUALITY PROTEIN: alpha-N-acetylgalactosaminidase [Bactrocera dorsalis]	Metabolism;Cellular Processes;Metabolism;Metabolism;Metabolism;Metabolism	Global and overview maps;Transport and catabolism;Lipid metabolism;Carbohydrate metabolism;Lipid metabolism;Glycan biosynthesis and metabolism	ko01100//Metabolic pathways;ko04142//Lysosome;ko00561//Glycerolipid metabolism;ko00052//Galactose metabolism;ko00600//Sphingolipid metabolism;ko00603//Glycosphingolipid biosynthesis - globo and isoglobo series	K01189;K01189;K01189;K01189;K01189;K01189	-	GO:0016798//hydrolase activity, acting on glycosyl bonds	GO:0044238//primary metabolic process;GO:0071704//organic substance metabolic process
LOC105233118	161	109	80	68	132	7	9	17	9	12	17.05	11.57	10.75	8.74	15.31	0.69	0.81	1.97	1	1.27	12.684	1.148	-3.46582	4.51839e-27	1.64921e-25	--	PREDICTED: uncharacterized protein LOC105233118 [Bactrocera dorsalis]	-	-	-	-	-	-	-
LOC105228748	12752	14846	11407	11342	12435	25473	33120	32585	25911	27477	267.54	312.4	303.71	288.93	285.92	499.43	592.12	746.85	572.4	574.69	291.7	597.098	1.03348	2.1738e-26	7.77525e-25	tpsA	PREDICTED: alpha,alpha-trehalose-phosphate synthase [UDP-forming] [Bactrocera dorsalis]	Metabolism;Metabolism	Global and overview maps;Carbohydrate metabolism	ko01100//Metabolic pathways;ko00500//Starch and sucrose metabolism	K16055;K16055	GO:0043232//intracellular non-membrane-bounded organelle	GO:0035251//UDP-glucosyltransferase activity	GO:0005991//trehalose metabolic process
LOC105231608	100	120	122	98	73	393	584	325	425	564	1.2	1.44	1.86	1.43	0.96	4.4	5.96	4.26	5.36	6.74	1.378	5.344	1.95534	7.28892e-26	2.57027e-24	Gld	PREDICTED: glucose dehydrogenase [FAD, quinone] [Bactrocera dorsalis]	-	-	-	-	-	GO:0000166//nucleotide binding;GO:0016614//oxidoreductase activity, acting on CH-OH group of donors	GO:0044710//single-organism metabolic process
LOC105234069	97	92	60	92	113	261	352	259	269	280	13.87	13.18	10.88	15.97	17.7	34.88	42.89	40.46	40.48	39.89	14.32	39.72	1.47183	1.2843e-25	4.49072e-24	-	-	-	-	-	-	-	-	-
LOC105225695	368	522	210	537	295	1880	2181	1792	1817	1944	41.6	59.15	30.12	73.69	36.53	198.65	210.11	221.33	216.17	218.97	48.218	213.046	2.14352	1.38468e-25	4.81475e-24	--	PREDICTED: glycine-rich cell wall structural protein-like, partial [Bactrocera dorsalis]	-	-	-	-	-	-	-
LOC105226613	360	410	260	229	348	131	145	140	98	122	7.86	8.97	7.2	6.07	8.32	2.67	2.7	3.34	2.25	2.65	7.684	2.722	-1.49719	2.37747e-25	8.24389e-24	Mcm2	PREDICTED: DNA replication licensing factor Mcm2 [Bactrocera dorsalis]	Cellular Processes;Genetic Information Processing	Cell growth and death;Replication and repair	ko04110//Cell cycle;ko03030//DNA replication	K02540;K02540	GO:0043231//intracellular membrane-bounded organelle;GO:0043234//protein complex	GO:0003676//nucleic acid binding;GO:0004386//helicase activity;GO:0032550//purine ribonucleoside binding	GO:0006259//DNA metabolic process;GO:0032392//DNA geometric change
LOC105233558	179	199	180	168	224	555	728	804	532	638	11.81	13.17	15.07	13.46	16.19	34.24	40.95	57.98	36.95	41.96	13.94	42.416	1.60538	4.61155e-25	1.58148e-23	--	PREDICTED: uncharacterized protein LOC105233558 [Bactrocera dorsalis]	-	-	-	-	-	-	-
LOC105228666	798	659	583	611	812	1744	2485	2659	1989	1935	51.67	42.78	47.9	48.03	57.6	105.57	137.14	188.13	135.56	124.86	49.596	138.252	1.479	5.31371e-25	1.81729e-23	--	GL21299 [Drosophila persimilis]	-	-	-	-	-	-	-
LOC105222124	305	286	326	289	341	99	122	118	103	68	8.38	7.88	11.37	9.64	10.27	2.54	2.86	3.54	2.98	1.86	9.508	2.756	-1.78657	6.26236e-25	2.13588e-23	--	Serine protease easter, partial [Bactrocera dorsalis]	-	-	-	-	-	-	-
LOC105232622	194	144	122	129	186	392	563	463	409	448	6.91	5.14	5.51	5.58	7.26	13.05	17.09	18.02	15.34	15.9	6.08	15.88	1.38507	7.22941e-25	2.4523e-23	Aldh7a1	aldehyde dehydrogenases [Bactrocera dorsalis]	Metabolism;Metabolism;Metabolism;Metabolism;Metabolism;Metabolism;Metabolism;Metabolism;Metabolism;Metabolism;Metabolism;Metabolism;Metabolism	Global and overview maps;Carbohydrate metabolism;Lipid metabolism;Amino acid metabolism;Carbohydrate metabolism;Amino acid metabolism;Lipid metabolism;Amino acid metabolism;Carbohydrate metabolism;Amino acid metabolism;Amino acid metabolism;Metabolism of other amino acids;Amino acid metabolism	ko01100//Metabolic pathways;ko00010//Glycolysis / Gluconeogenesis;ko00561//Glycerolipid metabolism;ko00310//Lysine degradation;ko00620//Pyruvate metabolism;ko00330//Arginine and proline metabolism;ko00071//Fatty acid degradation;ko00280//Valine, leucine and isoleucine degradation;ko00053//Ascorbate and aldarate metabolism;ko00260//Glycine, serine and threonine metabolism;ko00380//Tryptophan metab…	K14085;K14085;K14085;K14085;K14085;K14085;K14085;K14085;K14085;K14085;K14085;K14085;K14085	-	GO:0016903//oxidoreductase activity, acting on the aldehyde or oxo group of donors	GO:0044710//single-organism metabolic process
LOC105231166	6	6	5	2	1	66	84	58	74	97	0.29	0.3	0.31	0.12	0.05	3.03	3.52	3.11	3.83	4.75	0.214	3.648	4.09142	8.22627e-25	2.77537e-23	AGAP009593	PREDICTED: zinc carboxypeptidase [Bactrocera dorsalis]	-	-	-	-	-	-	-
LOC105225673	129	190	140	110	155	28	40	41	36	46	5.75	8.49	7.92	5.95	7.57	1.17	1.52	2	1.69	2.04	7.136	1.684	-2.08322	1.0187e-24	3.4001e-23	C1GalTA	PREDICTED: glycoprotein-N-acetylgalactosamine 3-beta-galactosyltransferase 1-like [Bactrocera dorsalis]	Metabolism;Metabolism	Global and overview maps;Glycan biosynthesis and metabolism	ko01100//Metabolic pathways;ko00512//Mucin type O-glycan biosynthesis	K00731;K00731	-	-	-
LOC105232835	390	311	226	302	344	86	53	84	59	32	47.01	37.58	34.57	44.2	45.43	9.69	5.44	11.06	7.49	3.84	41.758	7.504	-2.47632	1.04839e-24	3.48989e-23	Ctla2a	PREDICTED: protein CTLA-2-alpha [Bactrocera dorsalis]	Cellular Processes;Human Diseases;Cellular Processes;Human Diseases;Cellular Processes;Cellular Processes;Human Diseases;Organismal Systems	Transport and catabolism;Cancers;Transport and catabolism;Cardiovascular diseases;Transport and catabolism;Cell growth and death;Immune diseases;Immune system	ko04142//Lysosome;ko05205//Proteoglycans in cancer;ko04140//Autophagy - animal;ko05418//Fluid shear stress and atherosclerosis;ko04145//Phagosome;ko04210//Apoptosis;ko05323//Rheumatoid arthritis;ko04612//Antigen processing and presentation	K01365;K01365;K01365;K01365;K01365;K01365;K01365;K01365	-	-	-
LOC105233485	147	198	147	145	204	62	62	60	47	43	11.39	15.38	14.46	13.64	17.32	4.49	4.1	5.08	3.83	3.32	14.438	4.164	-1.79383	1.19721e-24	3.96414e-23	--	IP04193p [Drosophila melanogaster]	-	-	-	-	-	-	-
LOC105223442	285	281	278	206	323	624	882	696	641	718	9.47	9.36	11.72	8.31	11.75	19.38	24.97	25.26	22.41	23.77	10.122	23.158	1.19402	2.49894e-24	8.20902e-23	Glt	PREDICTED: glutactin [Bactrocera dorsalis]	-	-	-	-	-	-	-
LOC105234138	762	730	551	780	723	1581	1726	1652	1824	1750	14.96	14.42	13.77	18.66	15.62	28.92	28.97	35.45	37.81	34.35	15.486	33.1	1.09587	2.86401e-24	9.38357e-23	ABCG1	PREDICTED: ATP-binding cassette sub-family G member 1 [Bactrocera dorsalis]	-	-	-	-	-	GO:0017111//nucleoside-triphosphatase activity;GO:0032550//purine ribonucleoside binding	-
LOC105228590	24	26	4	29	6	296	396	220	267	208	2.91	3.16	0.62	4.27	0.8	33.54	40.91	29.14	34.06	25.12	2.352	32.554	3.79087	3.83855e-24	1.23816e-22	--	PREDICTED: uncharacterized protein LOC105228590 [Bactrocera dorsalis]	-	-	-	-	-	-	-
LOC105222774	287	351	204	220	222	671	745	511	724	742	5.14	6.25	4.38	4.78	4.47	10.7	10.42	9.53	12.45	12.28	5.004	11.076	1.14628	5.26475e-24	1.69381e-22	Slc41a2	PREDICTED: solute carrier family 41 member 1 [Bactrocera dorsalis]	-	-	-	-	-	GO:0015075//ion transmembrane transporter activity	GO:0006812//cation transport
LOC105227725	670	540	504	629	547	1313	1567	1361	1171	1512	46.72	37.75	44.59	53.25	41.78	85.58	93.12	103.69	85.94	105.06	44.818	94.678	1.07895	7.26907e-24	2.32071e-22	GST1	PREDICTED: glutathione S-transferase 1 [Bactrocera dorsalis]	Human Diseases;Human Diseases;Metabolism;Organismal Systems;Human Diseases;Human Diseases;Metabolism;Metabolism;Metabolism;Human Diseases;Human Diseases	Cancers;Cancers;Xenobiotics biodegradation and metabolism;Aging;Cardiovascular diseases;Cancers;Xenobiotics biodegradation and metabolism;Metabolism of other amino acids;Xenobiotics biodegradation and metabolism;Cancers;Drug resistance	ko05200//Pathways in cancer;ko05225//Hepatocellular carcinoma;ko00983//Drug metabolism - other enzymes;ko04212//Longevity regulating pathway - worm;ko05418//Fluid shear stress and atherosclerosis;ko05215//Prostate cancer;ko00980//Metabolism of xenobiotics by cytochrome P450;ko00480//Glutathione metabolism;ko00982//Drug metabolism - cytochrome P450;ko05204//Chemical carcinogenesis;ko01524//Platinu…	K00799;K00799;K00799;K00799;K00799;K00799;K00799;K00799;K00799;K00799;K00799	-	GO:0003824//catalytic activity	-
LOC105231087	107	108	86	76	58	19	9	7	14	7	13.39	13.63	13.94	11.09	8.08	2.1	1.07	0.98	1.65	0.82	12.026	1.324	-3.18318	8.28588e-24	2.63859e-22	--	PREDICTED: metallothionein-1-like isoform X1 [Bactrocera dorsalis]	-	-	-	-	-	-	-
LOC105223304	295	298	217	181	286	128	107	74	109	110	6.05	6.12	5.64	4.5	6.42	2.45	1.87	1.66	2.35	2.25	5.746	2.116	-1.44122	1.51596e-23	4.80298e-22	Mcm6	PREDICTED: DNA replication licensing factor Mcm6 [Bactrocera dorsalis]	Cellular Processes;Genetic Information Processing	Cell growth and death;Replication and repair	ko04110//Cell cycle;ko03030//DNA replication	K02542;K02542	GO:0043231//intracellular membrane-bounded organelle;GO:0043234//protein complex	GO:0003676//nucleic acid binding;GO:0004386//helicase activity;GO:0032550//purine ribonucleoside binding	GO:0006259//DNA metabolic process;GO:0032392//DNA geometric change
LOC105229562	1043	902	785	763	1320	2450	3744	3366	2744	2880	45.58	39.52	43.53	40.48	63.2	100.09	139.45	160.73	126.22	125.42	46.462	130.382	1.48862	3.97425e-23	1.23717e-21	Cyt-b5-r	PREDICTED: cytochrome b5-related protein [Bactrocera dorsalis]	-	-	-	-	-	GO:0043169//cation binding;GO:0046906//tetrapyrrole binding	-
LOC105228877	2738	1932	1481	1456	2302	542	542	824	583	523	139.11	98.4	95.48	89.8	128.12	25.74	23.47	45.74	31.17	26.48	110.182	30.52	-1.85206	5.8876e-23	1.82823e-21	Elovl1	PREDICTED: elongation of very long chain fatty acids protein F [Bactrocera dorsalis]	-	-	-	-	-	-	-
LOC105228069	102	111	107	74	223	672	795	765	648	594	4.85	5.29	6.46	4.27	11.62	29.89	32.24	39.78	32.45	28.17	6.498	32.506	2.32264	8.34204e-23	2.5712e-21	--	PREDICTED: uncharacterized protein LOC105228069 [Bactrocera dorsalis]	-	-	-	-	-	-	-
LOC105232749	425	648	463	418	563	149	195	219	177	186	47.31	72.3	65.39	56.48	68.65	15.5	18.5	26.63	20.74	20.63	62.026	20.4	-1.6043	1.08004e-22	3.28832e-21	CP12	PREDICTED: endocuticle structural protein SgAbd-6-like [Bactrocera dorsalis]	-	-	-	-	-	-	-
LOC105226980	54	89	71	65	92	2	0	3	1	1	1.5	2.48	2.5	2.19	2.8	0.05	0	0.09	0.03	0.03	2.294	0.04	-5.84172	1.24041e-22	3.7674e-21	--	PREDICTED: cuticle protein 16.5 [Bactrocera latifrons]	-	-	-	-	-	-	-
LOC105233819	89	65	50	80	105	262	345	263	243	279	11.72	8.58	8.36	12.79	15.15	32.26	38.73	37.85	33.69	36.62	11.32	35.83	1.66229	1.44322e-22	4.35944e-21	hgo	PREDICTED: homogentisate 1,2-dioxygenase-like [Bactrocera dorsalis]	Metabolism;Metabolism	Global and overview maps;Amino acid metabolism	ko01100//Metabolic pathways;ko00350//Tyrosine metabolism	K00451;K00451	-	-	GO:0006558//L-phenylalanine metabolic process
LOC105227668	267	233	190	245	214	93	136	94	100	91	8.16	7.14	7.37	9.09	7.16	2.66	3.54	3.14	3.22	2.77	7.784	3.066	-1.34415	1.47744e-22	4.44406e-21	Cyp4aa1	PREDICTED: probable cytochrome P450 4aa1 [Bactrocera dorsalis]	-	-	-	-	-	GO:0016491//oxidoreductase activity;GO:0046906//tetrapyrrole binding;GO:0046914//transition metal ion binding	GO:0044710//single-organism metabolic process
LOC105231031	114	103	113	110	83	22	11	20	18	6	6.06	5.49	7.62	7.1	4.83	1.09	0.5	1.16	1.01	0.32	6.22	0.816	-2.93027	1.51116e-22	4.53456e-21	--	PREDICTED: extensin [Bactrocera dorsalis]	-	-	-	-	-	-	-
LOC105231309	327	288	164	265	219	704	821	854	689	729	7.86	6.97	4.99	7.7	5.75	15.71	16.8	22.4	17.33	17.45	6.654	17.938	1.43073	1.58795e-22	4.75358e-21	SLC27A4	PREDICTED: long-chain fatty acid transport protein 4 isoform X1 [Bactrocera dorsalis]	Human Diseases;Organismal Systems;Organismal Systems	Endocrine and metabolic diseases;Endocrine system;Digestive system	ko04931//Insulin resistance;ko03320//PPAR signaling pathway;ko04975//Fat digestion and absorption	K08745;K08745;K08745	-	-	-
LOC105225845	59	59	58	45	65	10	6	10	5	9	0.39	0.39	0.48	0.36	0.47	0.06	0.03	0.07	0.03	0.06	0.418	0.05	-3.0635	1.63805e-22	4.88014e-21	--	PREDICTED: serine-rich adhesin for platelets [Bactrocera oleae]	-	-	-	-	-	-	-
LOC105223475	366	267	386	248	553	1480	1526	1416	1366	1531	33.08	24.19	44.27	27.21	54.76	125.06	117.57	139.86	129.97	137.91	36.702	130.074	1.8254	1.69048e-22	5.01243e-21	--	PREDICTED: C-type lectin 37Db-like isoform X2 [Bactrocera dorsalis]	-	-	-	-	-	-	-
LOC105223793	348	256	212	247	354	84	121	110	82	105	13.01	9.6	10.06	11.21	14.5	2.94	3.86	4.5	3.23	3.91	11.676	3.688	-1.66264	1.76349e-22	5.21651e-21	--	PREDICTED: uncharacterized protein LOC105223793 [Bactrocera dorsalis]	-	-	-	-	-	-	-
LOC105222903	753	609	713	625	862	331	387	299	268	375	42.84	34.75	51.55	43.2	53.86	17.59	18.83	18.62	16	21.37	45.24	18.482	-1.29148	1.89705e-22	5.59832e-21	C9orf64	PREDICTED: UPF0553 protein C9orf64 [Bactrocera dorsalis]	-	-	-	-	-	-	-
LOC109579331	127	175	143	199	174	55	34	37	40	29	3.93	5.43	5.62	7.48	5.9	1.59	0.9	1.25	1.3	0.89	5.672	1.186	-2.25775	2.18481e-22	6.41717e-21	--	PREDICTED: mucin-5AC-like [Bactrocera dorsalis]	Metabolism;Metabolism	Global and overview maps;Carbohydrate metabolism	ko01100//Metabolic pathways;ko00520//Amino sugar and nucleotide sugar metabolism	K01183;K01183	-	GO:0097367//carbohydrate derivative binding	GO:0006022//aminoglycan metabolic process
LOC105225675	431	485	379	413	378	1164	1658	836	985	965	5.59	6.31	6.24	6.51	5.37	14.12	18.34	11.85	13.45	12.48	6.004	14.048	1.22637	4.1117e-22	1.18536e-20	-	-	-	-	-	-	-	-	-
LOC105230711	83	95	103	95	101	261	279	266	268	254	3.38	3.88	5.32	4.7	4.51	9.94	9.69	11.84	11.49	10.31	4.358	10.654	1.28966	4.16028e-22	1.19661e-20	Tat	PREDICTED: tyrosine aminotransferase [Bactrocera dorsalis]	Metabolism;Metabolism;Metabolism;Metabolism;Metabolism;Metabolism;Metabolism	Global and overview maps;Global and overview maps;Amino acid metabolism;Amino acid metabolism;Metabolism of cofactors and vitamins;Amino acid metabolism;Amino acid metabolism	ko01100//Metabolic pathways;ko01230//Biosynthesis of amino acids;ko00270//Cysteine and methionine metabolism;ko00350//Tyrosine metabolism;ko00130//Ubiquinone and other terpenoid-quinone biosynthesis;ko00360//Phenylalanine metabolism;ko00400//Phenylalanine, tyrosine and tryptophan biosynthesis	K00815;K00815;K00815;K00815;K00815;K00815;K00815	-	GO:0043168//anion binding;GO:0070546//L-phenylalanine aminotransferase activity;GO:0070547//L-tyrosine aminotransferase activity	GO:0006520//cellular amino acid metabolic process
LOC105223381	118	157	112	107	116	335	310	253	286	260	2.14	2.85	2.57	2.35	2.3	5.67	4.78	5	5.45	4.69	2.442	5.118	1.06752	4.19905e-22	1.20222e-20	Lip3	PREDICTED: lipase 3 [Bactrocera dorsalis]	-	-	-	-	-	GO:0016787//hydrolase activity	GO:0006629//lipid metabolic process
LOC105231981	70	59	41	59	65	9	11	9	11	9	1.4	1.19	1.04	1.44	1.43	0.17	0.19	0.2	0.23	0.18	1.3	0.194	-2.74438	6.17004e-22	1.75846e-20	--	PREDICTED: rhoGEF domain-containing protein gxcI [Drosophila navojoa]	-	-	-	-	-	-	-
LOC105233968	935	758	748	578	766	1599	2405	2007	1893	1645	18.13	14.74	18.41	13.61	16.27	28.99	39.75	42.53	38.64	31.79	16.232	36.34	1.16272	6.9811e-22	1.97161e-20	-	-	-	-	-	-	-	-	-
LOC105223108	192	132	79	94	163	532	685	958	615	578	7.03	4.85	3.67	4.18	6.54	18.21	21.38	38.34	23.71	21.09	5.254	24.546	2.224	1.2479e-21	3.46168e-20	HMT-1	PREDICTED: homocysteine S-methyltransferase-like [Bactrocera oleae]	Metabolism;Metabolism	Global and overview maps;Amino acid metabolism	ko01100//Metabolic pathways;ko00270//Cysteine and methionine metabolism	K00547;K00547	-	GO:0008172//S-methyltransferase activity	GO:0008152//metabolic process
LOC105223147	86	104	51	105	85	276	334	242	272	321	2.68	3.25	2.02	3.98	2.91	8.05	8.88	8.25	8.93	9.98	2.968	8.818	1.57096	1.31889e-21	3.65049e-20	--	Thymic stromal cotransporter [Ceratitis capitata]	-	-	-	-	GO:0031224//intrinsic component of membrane	-	GO:0044763//single-organism cellular process
LOC105221900	86	74	91	90	86	17	23	21	24	15	9.11	7.86	12.23	11.57	9.98	1.68	2.08	2.43	2.67	1.58	10.15	2.088	-2.28129	2.19243e-21	6.04154e-20	--	PREDICTED: endocuticle structural glycoprotein SgAbd-9 [Bactrocera dorsalis]	-	-	-	-	-	GO:0005214//structural constituent of chitin-based cuticle	GO:0042335//cuticle development
LOC105227910	191	204	140	172	203	92	104	56	65	76	3.45	3.69	3.21	3.77	4.01	1.55	1.6	1.1	1.24	1.37	3.626	1.372	-1.4021	2.89283e-21	7.93653e-20	in	PREDICTED: protein inturned [Bactrocera dorsalis]	-	-	-	-	-	-	-
LOC105223295	6405	7259	4620	7058	5852	3455	2909	1537	2350	2473	138.25	157.06	126.53	184.94	138.37	69.71	53.51	36.25	53.39	53.19	149.03	53.21	-1.48583	4.23278e-21	1.15366e-19	aldh1l1	PREDICTED: LOW QUALITY PROTEIN: cytosolic 10-formyltetrahydrofolate dehydrogenase [Bactrocera dorsalis]	Metabolism	Metabolism of cofactors and vitamins	ko00670//One carbon pool by folate	K00289	GO:0044424//intracellular part	GO:0016646//oxidoreductase activity, acting on the CH-NH group of donors, NAD or NADP as acceptor;GO:0016741//transferase activity, transferring one-carbon groups;GO:0016903//oxidoreductase activity, acting on the aldehyde or oxo group of donors	GO:0009256//10-formyltetrahydrofolate metabolic process
LOC105233877	2602	3052	3950	3395	3769	1406	1382	1449	1128	1175	102.17	120.13	196.8	161.83	162.12	51.61	46.25	62.17	46.62	45.97	148.61	50.524	-1.55649	4.65458e-21	1.26586e-19	-	-	-	-	-	-	-	-	-
LOC105223355	66	143	74	61	62	10	14	5	6	9	2.85	6.18	4.05	3.19	2.93	0.4	0.51	0.24	0.27	0.39	3.84	0.362	-3.40704	6.03899e-21	1.62118e-19	BBOX1	Gamma-butyrobetaine dioxygenase, partial [Bactrocera dorsalis]	Metabolism	Amino acid metabolism	ko00310//Lysine degradation	K00471	-	-	GO:0044710//single-organism metabolic process
LOC105227858	237	241	237	259	209	99	113	96	96	121	12.17	12.41	15.45	16.15	11.76	4.75	4.95	5.39	5.19	6.19	13.588	5.294	-1.3599	6.46105e-21	1.72998e-19	--	PREDICTED: myb-like protein M [Bactrocera dorsalis]	-	-	-	-	-	-	-
LOC105225180	1358	1331	1266	1218	1817	521	808	519	475	373	88.13	86.59	104.26	96.02	129.1	31.64	43.94	36.83	32.29	24.11	100.82	33.762	-1.57831	8.144e-21	2.17226e-19	pho2	PREDICTED: 4-nitrophenylphosphatase-like isoform X1 [Bactrocera dorsalis]	Metabolism	Metabolism of terpenoids and polyketides	ko00981//Insect hormone biosynthesis	K21013	-	-	-
LOC105226450	2725	1912	1731	1720	2576	547	622	963	615	617	167.81	118.03	135.26	128.58	173.78	31.49	32.64	64.8	39.86	37.86	144.692	41.33	-1.80772	8.24151e-21	2.19358e-19	eloF	PREDICTED: elongation of very long chain fatty acids protein F [Bactrocera dorsalis]	Metabolism;Metabolism	Global and overview maps;Lipid metabolism	ko01100//Metabolic pathways;ko00062//Fatty acid elongation	K10249;K10249	-	-	-
LOC105226841	47	86	97	63	94	8	13	9	8	9	4.1	7.52	10.74	6.67	8.98	0.65	0.97	0.86	0.73	0.78	7.602	0.798	-3.25192	8.53896e-21	2.25353e-19	--	PREDICTED: larval cuticle protein A3A isoform X1 [Bactrocera dorsalis]	-	-	-	-	-	-	-
LOC105222353	56	65	65	63	68	0	3	0	1	2	0.38	0.44	0.56	0.52	0.51	0	0.02	0	0.01	0.01	0.482	0.008	-5.91289	1.02682e-20	2.70416e-19	SERPINB8	PREDICTED: mucin-17 isoform X1 [Bactrocera dorsalis]	-	-	-	-	-	-	-
LOC105221995	330	318	208	269	338	154	184	123	126	152	7.1	6.86	5.68	7.03	7.97	3.1	3.37	2.89	2.85	3.26	6.928	3.094	-1.16297	1.0575e-20	2.77912e-19	Sox5	PREDICTED: transcription factor SOX-5-like, partial [Drosophila navojoa]	-	-	-	-	-	-	-
LOC105225122	289	397	213	258	302	153	144	124	139	124	8.41	11.58	7.87	9.12	9.63	4.16	3.57	3.94	4.26	3.6	9.322	3.906	-1.25495	1.32616e-20	3.45605e-19	dpp	Protein decapentaplegic, partial [Bactrocera dorsalis]	Human Diseases;Environmental Information Processing;Human Diseases;Environmental Information Processing;Organismal Systems;Cellular Processes;Environmental Information Processing;Environmental Information Processing;Human Diseases;Environmental Information Processing	Cancers;Signal transduction;Cardiovascular diseases;Signal transduction;Endocrine system;Cellular community - eukaryotes;Signal transduction;Signal transduction;Cancers;Signaling molecules and interaction	ko05200//Pathways in cancer;ko04013//MAPK signaling pathway - fly;ko05418//Fluid shear stress and atherosclerosis;ko04390//Hippo signaling pathway;ko04919//Thyroid hormone signaling pathway;ko04550//Signaling pathways regulating pluripotency of stem cells;ko04350//TGF-beta signaling pathway;ko04341//Hedgehog signaling pathway - fly;ko05217//Basal cell carcinoma;ko04060//Cytokine-cytokine receptor…	K04662;K04662;K04662;K04662;K04662;K04662;K04662;K04662;K04662;K04662	GO:0042995//cell projection;GO:0043231//intracellular membrane-bounded organelle;GO:0044421//extracellular region part	GO:0005126//cytokine receptor binding;GO:0005539//glycosaminoglycan binding;GO:0032403//protein complex binding;GO:0046983//protein dimerization activity	GO:0001745//compound eye morphogenesis;GO:0002066//columnar/cuboidal epithelial cell development;GO:0006996//organelle organization;GO:0007310//oocyte dorsal/ventral axis specification;GO:0007448//anterior/posterior pattern specification, imaginal disc;GO:0007449//proximal/distal pattern formation, imaginal disc;GO:0007560//imaginal disc morphogenesis;GO:0008283//cell proliferation;GO:0008595//an…
LOC105230262	301	325	246	231	308	170	194	127	113	146	5.77	6.24	5.98	5.37	6.47	3.05	3.17	2.66	2.28	2.79	5.966	2.79	-1.0965	1.47462e-20	3.83495e-19	UGT8	PREDICTED: UDP-glucuronosyltransferase 1-8 [Bactrocera dorsalis]	Metabolism;Metabolism;Metabolism;Metabolism;Human Diseases;Metabolism;Organismal Systems;Metabolism;Metabolism;Metabolism;Metabolism	Global and overview maps;Xenobiotics biodegradation and metabolism;Xenobiotics biodegradation and metabolism;Xenobiotics biodegradation and metabolism;Cancers;Carbohydrate metabolism;Digestive system;Metabolism of cofactors and vitamins;Metabolism of cofactors and vitamins;Carbohydrate metabolism;Lipid metabolism	ko01100//Metabolic pathways;ko00983//Drug metabolism - other enzymes;ko00980//Metabolism of xenobiotics by cytochrome P450;ko00982//Drug metabolism - cytochrome P450;ko05204//Chemical carcinogenesis;ko00040//Pentose and glucuronate interconversions;ko04976//Bile secretion;ko00860//Porphyrin and chlorophyll metabolism;ko00830//Retinol metabolism;ko00053//Ascorbate and aldarate metabolism;ko00140//…	K00699;K00699;K00699;K00699;K00699;K00699;K00699;K00699;K00699;K00699;K00699	-	-	-
LOC105231754	739	440	505	534	481	279	270	207	250	230	9.63	5.75	8.35	8.44	6.86	3.4	3	2.95	3.43	2.99	7.806	3.154	-1.3074	1.6838e-20	4.36076e-19	l(2)03659	PREDICTED: LOW QUALITY PROTEIN: probable multidrug resistance-associated protein lethal(2)03659 [Bactrocera dorsalis]	-	-	-	-	GO:0031224//intrinsic component of membrane	GO:0015405//P-P-bond-hydrolysis-driven transmembrane transporter activity;GO:0017111//nucleoside-triphosphatase activity;GO:0032550//purine ribonucleoside binding	GO:0044763//single-organism cellular process;GO:0051234//establishment of localization
LOC105224947	118	144	134	107	111	342	530	271	344	363	3.37	4.13	4.86	3.71	3.48	9.14	12.91	8.46	10.35	10.34	3.91	10.24	1.38898	1.69797e-20	4.38836e-19	Cryl1	PREDICTED: lambda-crystallin homolog [Bactrocera dorsalis]	Metabolism;Metabolism	Global and overview maps;Carbohydrate metabolism	ko01100//Metabolic pathways;ko00040//Pentose and glucuronate interconversions	K13247;K13247	-	GO:0016614//oxidoreductase activity, acting on CH-OH group of donors;GO:0043168//anion binding;GO:0048037//cofactor binding	GO:0032787//monocarboxylic acid metabolic process
LOC105227488	364	418	295	255	521	53	126	44	43	28	28.76	33.1	29.57	24.46	45.09	3.91	8.48	3.8	3.58	2.2	32.196	4.394	-2.87327	1.74478e-20	4.50002e-19	SPCC285.04	PREDICTED: 5-hydroxyisourate hydrolase [Bactrocera dorsalis]	Metabolism;Metabolism	Global and overview maps;Nucleotide metabolism	ko01100//Metabolic pathways;ko00230//Purine metabolism	K07127;K07127	-	-	-
LOC105221865	40	52	33	115	40	495	458	491	448	615	4.15	5.41	4.35	14.5	4.55	48.06	40.54	55.73	48.98	63.66	6.592	51.394	2.96281	1.99084e-20	5.12405e-19	Obp56h	PREDICTED: general odorant-binding protein 56d-like [Bactrocera dorsalis]	-	-	-	-	-	-	-
LOC105224924	239	120	102	128	135	18	37	23	14	34	4.29	2.16	2.33	2.79	2.66	0.3	0.57	0.45	0.26	0.61	2.846	0.438	-2.69993	2.03323e-20	5.21166e-19	Cyp18a1	PREDICTED: cytochrome P450 18a1 [Bactrocera dorsalis]	Metabolism	Metabolism of terpenoids and polyketides	ko00981//Insect hormone biosynthesis	K14985	-	GO:0016491//oxidoreductase activity;GO:0046906//tetrapyrrole binding;GO:0046914//transition metal ion binding	GO:0044710//single-organism metabolic process
LOC105228430	322	326	190	221	236	680	637	745	595	614	8.47	7.89	6.05	7.02	6.85	16.63	14.21	21.66	16.81	16.25	7.256	17.112	1.23776	4.79474e-20	1.20915e-18	Slc18a2	PREDICTED: synaptic vesicular amine transporter isoform X1 [Bactrocera dorsalis]	Human Diseases;Organismal Systems;Organismal Systems;Human Diseases;Organismal Systems;Human Diseases;Human Diseases	Neurodegenerative diseases;Nervous system;Nervous system;Substance dependence;Nervous system;Substance dependence;Substance dependence	ko05012//Parkinson disease;ko04728//Dopaminergic synapse;ko04721//Synaptic vesicle cycle;ko05034//Alcoholism;ko04726//Serotonergic synapse;ko05031//Amphetamine addiction;ko05030//Cocaine addiction	K08155;K08155;K08155;K08155;K08155;K08155;K08155	GO:0016023//cytoplasmic, membrane-bounded vesicle;GO:0031224//intrinsic component of membrane;GO:0045202//synapse	GO:0005275//amine transmembrane transporter activity	GO:0006812//cation transport;GO:0015837//amine transport;GO:0044763//single-organism cellular process
LOC105231752	207	195	188	228	156	572	615	419	441	585	13.5	12.75	15.55	18.05	11.14	34.87	34.18	29.85	30.27	38.01	14.198	33.436	1.23571	5.83611e-20	1.46879e-18	Rdh14	PREDICTED: LOW QUALITY PROTEIN: retinol dehydrogenase 14 [Bactrocera dorsalis]	-	-	-	-	-	GO:0003824//catalytic activity	GO:0044710//single-organism metabolic process
LOC105230495	610	554	409	403	371	1339	1472	864	1028	994	14.39	13.73	12.39	11.83	9.72	31.56	31.04	22.86	26.96	24.46	12.412	27.376	1.14118	9.62335e-20	2.40256e-18	--	PREDICTED: kinesin-related protein 6 isoform X2 [Bactrocera dorsalis]	-	-	-	-	-	-	-
LOC105222113	116	135	139	97	102	32	44	18	36	20	2.51	2.93	3.82	2.55	2.42	0.65	0.81	0.43	0.82	0.43	2.846	0.628	-2.1801	1.06814e-19	2.66139e-18	-	-	-	-	-	-	-	-	-
LOC105232872	88	126	96	109	147	359	840	431	417	492	3.19	4.58	4.42	4.8	5.84	12.17	25.96	17.07	15.91	17.78	4.566	17.778	1.96109	1.24312e-19	3.07286e-18	-	-	-	-	-	-	-	-	-
LOC105229757	147	128	49	181	104	0	10	10	6	6	5.85	5.11	2.48	8.75	4.54	0	0.34	0.44	0.25	0.24	5.346	0.254	-4.39556	1.29904e-19	3.20473e-18	--	PREDICTED: serine/arginine repetitive matrix protein 5 [Bactrocera dorsalis]	-	-	-	-	-	-	-
LOC105225709	63	143	48	37	54	543	1092	449	479	354	3.65	8.31	3.53	2.6	3.43	29.43	53.95	28.44	29.23	20.45	4.304	32.3	2.90778	1.49911e-19	3.68374e-18	dhs-21	3-oxoacyl-(acyl-carrier-protein) reductase FabG, partial [Bactrocera dorsalis]	-	-	-	-	-	-	-
LOC105229914	155	164	144	140	161	90	61	56	69	63	1.27	1.34	1.49	1.39	1.44	0.69	0.42	0.5	0.59	0.51	1.386	0.542	-1.35456	1.96344e-19	4.79639e-18	ANKFN1	Ankyrin repeat and fibronectin type-III domain-containing protein 1, partial [Bactrocera dorsalis]	-	-	-	-	-	-	-
LOC105226408	348	369	289	251	314	651	1086	703	817	654	8.55	9.09	9.01	7.49	8.46	14.96	22.75	18.88	21.14	16.02	8.52	18.75	1.13797	2.41587e-19	5.89011e-18	PDSS1	PREDICTED: decaprenyl-diphosphate synthase subunit 1 [Bactrocera dorsalis]	Metabolism	Metabolism of terpenoids and polyketides	ko00900//Terpenoid backbone biosynthesis	K12504	-	GO:0016740//transferase activity;GO:0032550//purine ribonucleoside binding	GO:0006464//cellular protein modification process;GO:0006720//isoprenoid metabolic process;GO:0006950//response to stress;GO:0042981//regulation of apoptotic process;GO:0048864//stem cell development
MSTRG.5079	102	146	89	111	106	282	333	302	315	252	2.12	3.04	2.35	2.8	2.42	5.48	5.9	6.86	6.9	5.22	2.546	6.072	1.25394	2.45881e-19	5.9831e-18	--	-	-	-	-	-	-	-	-
LOC105228565	406	226	380	304	520	67	85	111	86	65	45.5	25.39	54.04	41.36	63.84	7.02	8.12	13.59	10.14	7.26	46.026	9.226	-2.31867	2.64074e-19	6.41329e-18	--	Serine protease persephone [Ceratitis capitata]	-	-	-	-	-	-	-
LOC105232034	2656	2044	1951	2148	2302	627	933	1036	830	1093	82.95	63.99	77.32	81.44	78.76	18.31	24.83	35.35	27.28	34.02	76.892	27.958	-1.45957	3.23731e-19	7.84686e-18	--	PREDICTED: acidic phospholipase A2 PA4 [Drosophila arizonae]	Metabolism;Organismal Systems;Environmental Information Processing;Organismal Systems;Metabolism;Organismal Systems;Metabolism;Metabolism;Metabolism;Metabolism	Global and overview maps;Digestive system;Signal transduction;Circulatory system;Lipid metabolism;Digestive system;Lipid metabolism;Lipid metabolism;Lipid metabolism;Lipid metabolism	ko01100//Metabolic pathways;ko04972//Pancreatic secretion;ko04014//Ras signaling pathway;ko04270//Vascular smooth muscle contraction;ko00564//Glycerophospholipid metabolism;ko04975//Fat digestion and absorption;ko00565//Ether lipid metabolism;ko00590//Arachidonic acid metabolism;ko00592//alpha-Linolenic acid metabolism;ko00591//Linoleic acid metabolism	K01047;K01047;K01047;K01047;K01047;K01047;K01047;K01047;K01047;K01047	-	-	GO:0006629//lipid metabolic process
LOC105231592	62	59	71	101	105	306	477	272	351	355	1.11	1.06	1.61	2.19	2.06	5.12	7.27	5.32	6.61	6.33	1.606	6.13	1.93242	4.02295e-19	9.69468e-18	4CL3	Luciferin 4-monooxygenase [Bactrocera dorsalis]	-	-	-	-	-	-	-
LOC105223822	29	15	22	29	14	285	1388	500	492	242	2.15	1.12	2.07	2.61	1.14	19.76	87.72	40.49	38.4	17.88	1.818	40.85	4.48991	9.11838e-19	2.15284e-17	SDR-1	PREDICTED: farnesol dehydrogenase-like [Bactrocera dorsalis]	Metabolism;Metabolism	Metabolism of terpenoids and polyketides;Metabolism of terpenoids and polyketides	ko00981//Insect hormone biosynthesis;ko00900//Terpenoid backbone biosynthesis	K15890;K15890	-	-	-
LOC105232205	135	104	115	126	105	316	363	321	290	253	4.67	3.61	5.01	5.19	3.85	10.19	10.7	12.08	10.48	8.65	4.466	10.42	1.2223	9.12321e-19	2.15284e-17	--	PREDICTED: kelch-like protein diablo [Bactrocera dorsalis]	Human Diseases;Human Diseases;Genetic Information Processing;Human Diseases	Cancers;Cancers;Folding, sorting and degradation;Cardiovascular diseases	ko05200//Pathways in cancer;ko05225//Hepatocellular carcinoma;ko04120//Ubiquitin mediated proteolysis;ko05418//Fluid shear stress and atherosclerosis	K10456;K10456;K10456;K10456	-	-	-
MSTRG.5190	46	77	73	73	87	274	448	462	302	272	3.11	5.22	6.27	5.99	6.45	17.32	25.82	34.14	21.5	18.33	5.408	23.422	2.1147	1.07855e-18	2.5355e-17	--	-	-	-	-	-	-	-	-
LOC105231792	188	228	224	197	247	120	106	90	96	84	3.1	3.76	4.68	3.94	4.46	1.85	1.49	1.62	1.66	1.38	3.988	1.6	-1.31759	1.1187e-18	2.62003e-17	-	-	-	-	-	-	-	-	-
LOC115066547	171	164	89	121	190	397	642	694	488	629	4.43	4.26	2.92	3.8	5.39	9.61	14.17	19.64	13.3	16.23	4.16	14.59	1.81032	1.13726e-18	2.6585e-17	nep-21	PREDICTED: membrane metallo-endopeptidase-like 1 [Bactrocera latifrons]	-	-	-	-	-	-	-
LOC105227092	4911	3660	2785	3162	4222	1614	1582	2106	1503	1580	136.08	101.66	97.92	106.36	128.15	41.81	37.36	63.76	43.83	43.63	114.034	46.078	-1.30731	1.20892e-18	2.82074e-17	Acss3	PREDICTED: acyl-CoA synthetase short-chain family member 3, mitochondrial [Bactrocera dorsalis]	Metabolism;Metabolism	Global and overview maps;Carbohydrate metabolism	ko01100//Metabolic pathways;ko00640//Propanoate metabolism	K01908;K01908	-	-	-
MSTRG.2082	173	181	147	218	185	74	58	53	75	44	24.41	25.6	26.32	37.35	28.6	9.76	6.98	8.17	11.14	6.19	28.456	8.448	-1.75205	1.49479e-18	3.47477e-17	--	-	-	-	-	-	-	-	-
LOC105227637	514	432	543	510	577	1119	1783	1331	1253	1461	19.82	16.7	26.57	23.88	24.38	40.34	58.61	56.09	50.86	56.15	22.27	52.41	1.23474	1.51852e-18	3.51682e-17	-	-	-	-	-	-	-	-	-
LOC105229089	490	609	342	276	459	210	191	188	180	169	12.82	15.97	11.35	8.77	13.16	5.14	4.26	5.37	4.96	4.41	12.414	4.828	-1.36247	1.58234e-18	3.64435e-17	Mcm7	PREDICTED: DNA replication licensing factor Mcm7 [Bactrocera dorsalis]	Cellular Processes;Genetic Information Processing	Cell growth and death;Replication and repair	ko04110//Cell cycle;ko03030//DNA replication	K02210;K02210	GO:0043231//intracellular membrane-bounded organelle;GO:0043234//protein complex	GO:0003676//nucleic acid binding;GO:0004386//helicase activity;GO:0032550//purine ribonucleoside binding	GO:0006259//DNA metabolic process;GO:0032392//DNA geometric change
LOC105229756	218	425	219	361	227	57	84	81	71	85	11.22	21.93	14.31	22.56	12.8	2.74	3.69	4.56	3.85	4.36	16.564	3.84	-2.10887	2.49657e-18	5.70781e-17	--	PREDICTED: pinin [Bactrocera dorsalis]	-	-	-	-	-	-	-
LOC105232314	844	814	511	675	774	344	269	373	351	293	13.51	13.06	10.38	13.12	13.57	5.15	3.67	6.52	5.91	4.67	12.728	5.184	-1.29587	3.00917e-18	6.85464e-17	-	-	-	-	-	-	-	-	-
LOC105223858	259	257	260	222	312	115	155	94	135	95	19.11	19.01	24.33	19.87	25.22	7.93	9.74	7.58	10.48	6.98	21.508	8.542	-1.33223	3.05761e-18	6.95231e-17	HmgD	PREDICTED: high mobility group protein D [Bactrocera dorsalis]	-	-	-	-	-	-	-
LOC105222377	334	286	224	228	274	147	157	122	146	179	5.14	4.41	4.37	4.25	4.62	2.11	2.04	2.05	2.36	2.74	4.558	2.26	-1.01208	3.07076e-18	6.9695e-17	SLC7A5	PREDICTED: large neutral amino acids transporter small subunit 1 [Bactrocera dorsalis]	-	-	-	-	GO:0031224//intrinsic component of membrane	GO:0046943//carboxylic acid transmembrane transporter activity	-
LOC105232313	81	97	69	89	83	24	28	29	25	14	2.51	3.01	2.72	3.35	2.82	0.7	0.74	0.98	0.82	0.43	2.882	0.734	-1.97322	3.32939e-18	7.54279e-17	-	-	-	-	-	-	-	-	-
LOC105226762	48	57	41	54	93	4	0	3	4	7	1.36	1.61	1.47	1.85	2.88	0.11	0	0.09	0.12	0.2	1.834	0.104	-4.14034	3.78909e-18	8.5532e-17	SERPINB3	PREDICTED: LOW QUALITY PROTEIN: serpin B13 [Bactrocera dorsalis]	-	-	-	-	-	-	-
LOC105223247	592	745	742	628	889	258	136	134	176	299	10.57	13.29	16.76	13.6	17.31	4.29	2.09	2.66	3.31	5.4	14.306	3.55	-2.01073	4.3258e-18	9.72955e-17	--	PREDICTED: mucin-19 [Bactrocera dorsalis]	-	-	-	-	-	-	-
LOC105229437	84	108	84	90	86	226	315	229	223	197	2.33	3.01	2.96	3.04	2.62	5.87	7.46	6.95	6.52	5.45	2.792	6.45	1.208	4.71817e-18	1.0555e-16	Csad	PREDICTED: cysteine sulfinic acid decarboxylase [Bactrocera dorsalis]	Metabolism;Metabolism	Global and overview maps;Metabolism of other amino acids	ko01100//Metabolic pathways;ko00430//Taurine and hypotaurine metabolism	K01594;K01594	-	GO:0016830//carbon-carbon lyase activity;GO:0043168//anion binding	GO:0043436//oxoacid metabolic process
LOC105228753	93	80	89	56	60	220	343	210	200	241	3.76	3.25	4.68	2.66	2.53	7.98	11.73	9.17	8.28	9.51	3.376	9.334	1.46718	5.49883e-18	1.22356e-16	Rerg	PREDICTED: ras-related and estrogen-regulated growth inhibitor isoform X1 [Bactrocera dorsalis]	-	-	-	-	GO:0044464//cell part	GO:0032550//purine ribonucleoside binding	GO:0008104//protein localization;GO:0035556//intracellular signal transduction
LOC105232726	327	425	360	323	409	178	215	194	177	217	9.95	12.96	13.89	11.93	13.63	5.06	5.57	6.45	5.67	6.58	12.472	5.866	-1.08824	5.69068e-18	1.264e-16	ASN2	PREDICTED: asparagine synthetase [glutamine-hydrolyzing] 2 [Bactrocera dorsalis]	Metabolism;Metabolism	Global and overview maps;Amino acid metabolism	ko01100//Metabolic pathways;ko00250//Alanine, aspartate and glutamate metabolism	K01953;K01953	-	GO:0016884//carbon-nitrogen ligase activity, with glutamine as amido-N-donor;GO:0032550//purine ribonucleoside binding	GO:0006529//asparagine biosynthetic process
LOC105226200	566	528	489	400	699	205	294	260	251	229	33.23	31.07	36.42	28.51	44.95	11.25	14.71	16.68	15.51	13.4	34.836	14.31	-1.28356	8.05733e-18	1.78017e-16	--	PREDICTED: probable salivary secreted peptide [Bactrocera dorsalis]	-	-	-	-	-	-	-
LOC115066576	21	17	8	17	8	81	103	70	61	78	0.29	0.23	0.14	0.28	0.12	1.03	1.19	1.04	0.87	1.06	0.212	1.038	2.29167	8.19267e-18	1.80687e-16	--	PREDICTED: microtubule-associated protein futsch [Rhagoletis zephyria]	-	-	-	-	-	-	-
LOC105222836	774	666	748	562	687	324	483	333	306	266	19.46	16.78	23.86	17.15	18.92	7.61	10.35	9.15	8.1	6.66	19.234	8.374	-1.19967	1.08595e-17	2.36579e-16	-	-	-	-	-	-	-	-	-
LOC105230250	167	189	152	154	228	86	101	72	74	86	2.5	2.84	2.89	2.79	3.74	1.2	1.28	1.19	1.17	1.28	2.952	1.224	-1.27009	2.54014e-17	5.42028e-16	--	PREDICTED: restin homolog isoform X4 [Bactrocera latifrons]	-	-	-	-	-	-	-
LOC105233535	127	138	127	105	137	56	55	56	34	59	1.95	2.12	2.47	1.95	2.3	0.8	0.72	0.94	0.55	0.9	2.158	0.782	-1.46445	2.7825e-17	5.9172e-16	--	Atrial natriuretic peptide-converting enzyme, partial [Bactrocera dorsalis]	-	-	-	-	-	GO:0016798//hydrolase activity, acting on glycosyl bonds	GO:0006022//aminoglycan metabolic process
LOC105229523	811	943	920	1268	560	3945	3387	3220	3034	2896	18.87	21.99	27.16	35.82	14.27	85.81	67.16	81.86	74.3	67.15	23.622	75.256	1.67168	3.18277e-17	6.72259e-16	--	PREDICTED: uncharacterized protein LOC105229523 [Bactrocera dorsalis]	-	-	-	-	-	-	-
LOC105224038	465	576	368	415	497	250	332	203	226	298	5.82	7.25	5.86	6.33	6.84	2.93	3.55	2.79	2.99	3.73	6.42	3.198	-1.0054	5.04394e-17	1.04939e-15	Tanc2	PREDICTED: protein TANC2 isoform X3 [Bactrocera dorsalis]	-	-	-	-	-	-	-
LOC105232403	9735	9088	9462	7069	11410	18468	29244	24156	20331	20827	297.78	278.66	367.25	262.5	382.33	528.06	762.35	807.34	654.53	634.82	317.704	677.42	1.09237	1.10246e-16	2.2487e-15	--	PREDICTED: proteoglycan 4-like [Bactrocera dorsalis]	-	-	-	-	-	-	-
LOC115065727	80	127	121	113	113	302	419	262	301	367	1.23	2.23	2.41	1.99	2.08	4.79	5.8	4.97	5.06	5.92	1.988	5.308	1.41685	1.15933e-16	2.36083e-15	-	-	-	-	-	-	-	-	-
LOC105229398	211	229	145	192	190	121	120	96	103	93	4.72	5.13	4.11	5.21	4.65	2.53	2.29	2.34	2.42	2.07	4.764	2.33	-1.03184	1.37211e-16	2.77154e-15	sug	PREDICTED: zinc finger protein GLIS2 homolog [Bactrocera dorsalis]	-	-	-	-	-	GO:0043169//cation binding	-
LOC105233179	94	80	106	129	134	314	511	319	374	399	5.18	4.42	7.41	8.63	8.09	16.17	23.99	19.2	21.69	21.9	6.746	20.59	1.60984	1.61809e-16	3.25259e-15	--	AGAP004674-PA [Anopheles gambiae str. PEST] [Anopheles gambiae]	-	-	-	-	-	-	-
LOC105228070	607	524	904	528	1060	4062	4609	5994	3945	3700	27.83	24.08	52.59	29.39	53.24	174.1	180.1	300.29	190.37	169.05	37.426	202.782	2.43782	1.78355e-16	3.57222e-15	--	PREDICTED: uncharacterized protein LOC105228070 [Bactrocera dorsalis]	-	-	-	-	-	-	-
LOC105222215	2714	1992	1946	1532	2361	1013	1181	1253	996	889	60.69	44.65	55.21	41.59	57.83	21.17	22.51	30.61	23.44	19.81	51.994	23.508	-1.14519	1.78568e-16	3.57222e-15	v1g246094	PREDICTED: branched-chain-amino-acid aminotransferase, cytosolic [Bactrocera dorsalis]	Metabolism;Metabolism;Metabolism;Metabolism;Metabolism;Metabolism;Metabolism	Global and overview maps;Global and overview maps;Amino acid metabolism;Amino acid metabolism;Global and overview maps;Metabolism of cofactors and vitamins;Amino acid metabolism	ko01100//Metabolic pathways;ko01230//Biosynthesis of amino acids;ko00270//Cysteine and methionine metabolism;ko00280//Valine, leucine and isoleucine degradation;ko01210//2-Oxocarboxylic acid metabolism;ko00770//Pantothenate and CoA biosynthesis;ko00290//Valine, leucine and isoleucine biosynthesis	K00826;K00826;K00826;K00826;K00826;K00826;K00826	-	GO:0004084//branched-chain-amino-acid transaminase activity	GO:0008652//cellular amino acid biosynthetic process
LOC105223797	540	545	1014	639	424	165	214	183	152	162	20.56	20.98	49.45	29.61	17.86	5.94	7.03	7.66	6.19	6.21	27.692	6.606	-2.06762	1.86628e-16	3.70968e-15	--	PREDICTED: chitin biosynthesis protein CHS5-like isoform X1 [Bactrocera oleae]	-	-	-	-	-	-	-
LOC105222381	418	343	304	232	384	161	185	175	178	178	20.8	17.11	19.19	14.02	20.93	7.49	7.85	9.51	9.32	8.83	18.41	8.6	-1.09808	1.9376e-16	3.84533e-15	TMLHE	PREDICTED: trimethyllysine dioxygenase, mitochondrial [Bactrocera dorsalis]	Metabolism	Amino acid metabolism	ko00310//Lysine degradation	K00474	-	GO:0016491//oxidoreductase activity	GO:0044710//single-organism metabolic process
LOC105234011	44	46	38	29	54	1	7	2	0	1	0.63	0.66	0.69	0.5	0.84	0.01	0.09	0.03	0	0.01	0.664	0.028	-4.56768	1.98979e-16	3.94264e-15	PPAF2	Serine proteinase stubble [Bactrocera dorsalis]	-	-	-	-	-	GO:0004175//endopeptidase activity	GO:0019538//protein metabolic process
LOC105221945	986	753	844	607	857	1537	2384	1769	1653	1941	41.27	31.59	44.82	30.84	39.29	60.14	85.04	80.9	72.82	80.96	37.562	75.972	1.01619	2.12202e-16	4.19132e-15	Hex-t2	PREDICTED: hexokinase type 2 [Bactrocera dorsalis]	Metabolism;Metabolism;Organismal Systems;Environmental Information Processing;Metabolism;Metabolism;Metabolism;Human Diseases;Metabolism;Metabolism;Human Diseases;Organismal Systems;Metabolism	Global and overview maps;Global and overview maps;Endocrine system;Signal transduction;Carbohydrate metabolism;Carbohydrate metabolism;Carbohydrate metabolism;Cancers;Carbohydrate metabolism;Carbohydrate metabolism;Endocrine and metabolic diseases;Digestive system;Biosynthesis of other secondary metabolites	ko01100//Metabolic pathways;ko01200//Carbon metabolism;ko04910//Insulin signaling pathway;ko04066//HIF-1 signaling pathway;ko00010//Glycolysis / Gluconeogenesis;ko00520//Amino sugar and nucleotide sugar metabolism;ko00500//Starch and sucrose metabolism;ko05230//Central carbon metabolism in cancer;ko00052//Galactose metabolism;ko00051//Fructose and mannose metabolism;ko04930//Type II diabetes mell…	K00844;K00844;K00844;K00844;K00844;K00844;K00844;K00844;K00844;K00844;K00844;K00844;K00844	-	GO:0016773//phosphotransferase activity, alcohol group as acceptor;GO:0032550//purine ribonucleoside binding	GO:0006090//pyruvate metabolic process;GO:0016310//phosphorylation;GO:0044238//primary metabolic process
LOC105222226	30	37	24	51	39	130	160	176	165	134	0.34	0.42	0.34	0.7	0.48	1.37	1.53	2.16	1.95	1.5	0.456	1.702	1.90013	2.74539e-16	5.37158e-15	Cbp53E	PREDICTED: calbindin-32 isoform X1 [Bactrocera dorsalis]	-	-	-	-	-	-	-
LOC105231171	2190	1751	1360	2782	1200	442	747	607	527	554	35.57	28.51	28.03	54.85	21.35	6.72	10.35	10.79	9.02	8.97	33.662	9.17	-1.87613	3.07839e-16	6.00431e-15	CD109	CD109 antigen, partial [Bactrocera dorsalis]	-	-	-	-	GO:0044421//extracellular region part	-	GO:0010466//negative regulation of peptidase activity
LOC105222466	118	78	72	83	66	223	258	212	180	211	8.78	5.82	6.8	7.5	5.38	15.51	16.36	17.24	14.1	15.65	6.856	15.772	1.20193	4.20356e-16	8.13536e-15	Hsp23	PREDICTED: heat shock protein 23-like [Bactrocera dorsalis]	-	-	-	-	-	-	-
LOC105234190	136	138	91	172	101	335	515	356	452	405	3.85	3.92	3.27	5.91	3.13	8.86	12.42	11.01	13.47	11.42	4.016	11.436	1.50975	5.86435e-16	1.12796e-14	-	-	-	-	-	-	-	-	-
LOC105229163	193	173	175	173	213	371	522	462	395	397	16.29	14.52	18.78	17.59	19.53	29.33	37.44	42.52	35.31	33.64	17.342	35.648	1.03955	7.66453e-16	1.46743e-14	5FCL	PREDICTED: 5-formyltetrahydrofolate cyclo-ligase isoform X1 [Bactrocera dorsalis]	Metabolism;Metabolism	Global and overview maps;Metabolism of cofactors and vitamins	ko01100//Metabolic pathways;ko00670//One carbon pool by folate	K01934;K01934	-	GO:0016882//cyclo-ligase activity;GO:0043167//ion binding	-
LOC105223305	412	418	243	380	314	201	228	148	159	186	21.99	22.37	16.46	24.62	18.36	10.03	10.37	8.63	8.93	9.89	20.76	9.57	-1.11722	7.69782e-16	1.47155e-14	PCNA	PREDICTED: proliferating cell nuclear antigen [Bactrocera dorsalis]	Human Diseases;Cellular Processes;Cellular Processes;Human Diseases;Genetic Information Processing;Genetic Information Processing;Genetic Information Processing;Genetic Information Processing	Infectious diseases;Cell growth and death;Cellular community - eukaryotes;Infectious diseases;Replication and repair;Replication and repair;Replication and repair;Replication and repair	ko05166//HTLV-I infection;ko04110//Cell cycle;ko04530//Tight junction;ko05161//Hepatitis B;ko03420//Nucleotide excision repair;ko03030//DNA replication;ko03430//Mismatch repair;ko03410//Base excision repair	K04802;K04802;K04802;K04802;K04802;K04802;K04802;K04802	GO:0043231//intracellular membrane-bounded organelle;GO:0044796//DNA polymerase processivity factor complex	GO:0003676//nucleic acid binding;GO:0030234//enzyme regulator activity	GO:0006271//DNA strand elongation involved in DNA replication;GO:0006277//DNA amplification;GO:0006281//DNA repair;GO:0006959//humoral immune response;GO:0007051//spindle organization;GO:0030154//cell differentiation;GO:0051052//regulation of DNA metabolic process
LOC105230543	520	490	456	337	513	1130	2048	2127	1303	1163	34.49	32.58	38.38	27.14	37.28	70.07	115.77	154.16	90.97	76.87	33.974	101.568	1.57994	9.83094e-16	1.86221e-14	--	PREDICTED: uncharacterized protein LOC105230543 [Bactrocera dorsalis]	-	-	-	-	-	-	-
LOC105222575	240	171	140	228	165	443	588	422	515	527	2.76	1.92	2.03	3.16	2.01	4.66	5.69	5.27	6.15	5.93	2.376	5.54	1.22135	1.05262e-15	1.99089e-14	--	PREDICTED: proteoglycan 4 [Bactrocera oleae]	-	-	-	-	-	-	-
LOC105226863	83	71	78	71	81	184	214	163	152	169	5.01	4.29	5.97	5.2	5.35	10.38	11	10.74	9.65	10.16	5.164	10.386	1.00808	1.07587e-15	2.02871e-14	--	PREDICTED: chromodomain-helicase-DNA-binding protein 8 [Bactrocera dorsalis]	-	-	-	-	-	-	-
LOC105229218	376	606	416	295	272	1020	1876	1219	1108	1285	10.81	17.48	15.17	10.3	8.57	27.42	45.97	38.29	33.53	36.82	12.466	36.406	1.54618	1.211e-15	2.2664e-14	acsf2	Acyl-CoA synthetase family member 2, mitochondrial [Bactrocera dorsalis]	-	-	-	-	-	-	-
LOC105227310	103	97	66	84	84	34	40	34	21	37	1.94	1.83	1.58	1.92	1.74	0.6	0.64	0.7	0.42	0.7	1.802	0.612	-1.558	1.51584e-15	2.8158e-14	DAT	PREDICTED: sodium-dependent dopamine transporter [Bactrocera dorsalis]	Human Diseases;Organismal Systems;Human Diseases;Human Diseases;Human Diseases	Neurodegenerative diseases;Nervous system;Substance dependence;Substance dependence;Substance dependence	ko05012//Parkinson disease;ko04728//Dopaminergic synapse;ko05034//Alcoholism;ko05031//Amphetamine addiction;ko05030//Cocaine addiction	K05036;K05036;K05036;K05036;K05036	GO:0031224//intrinsic component of membrane	GO:0015291//secondary active transmembrane transporter activity	GO:0044763//single-organism cellular process;GO:0044765//single-organism transport
LOC105227988	166	175	138	239	135	549	746	441	500	463	11.37	12.01	11.99	19.87	10.13	35.15	43.54	33	36.04	31.6	13.074	35.866	1.45592	1.52345e-15	2.82574e-14	mdh	Malate dehydrogenase, partial [Bactrocera dorsalis]	-	-	-	-	-	GO:0003824//catalytic activity	GO:0044710//single-organism metabolic process
LOC105222769	607	402	359	328	522	176	158	223	176	182	15.42	10.24	11.58	10.11	14.53	4.17	3.42	6.2	4.69	4.6	12.376	4.616	-1.42283	1.60284e-15	2.96859e-14	wat	GH24373 [Drosophila grimshawi]	Cellular Processes;Organismal Systems;Metabolism	Transport and catabolism;Aging;Lipid metabolism	ko04146//Peroxisome;ko04212//Longevity regulating pathway - worm;ko00073//Cutin, suberine and wax biosynthesis	K13356;K13356;K13356	-	-	-
LOC105221968	181	212	162	135	202	94	80	71	71	107	7.95	9.33	9.03	7.2	9.72	3.86	2.99	3.41	3.28	4.68	8.646	3.644	-1.24651	1.61571e-15	2.98799e-14	bocks	PREDICTED: otefin [Bactrocera dorsalis]	-	-	-	-	-	-	-
LOC105227184	261	280	278	176	303	149	139	104	125	132	4.46	4.8	6.03	3.65	5.67	2.38	2.03	1.94	2.25	2.25	4.922	2.17	-1.18155	1.71322e-15	3.15896e-14	Msh6	PREDICTED: probable DNA mismatch repair protein Msh6 [Bactrocera dorsalis]	Human Diseases;Human Diseases;Human Diseases;Genetic Information Processing	Cancers;Drug resistance;Cancers;Replication and repair	ko05200//Pathways in cancer;ko01524//Platinum drug resistance;ko05210//Colorectal cancer;ko03430//Mismatch repair	K08737;K08737;K08737;K08737	-	GO:0003690//double-stranded DNA binding;GO:0032550//purine ribonucleoside binding	GO:0006298//mismatch repair
LOC105221842	226	258	177	190	235	80	125	108	96	126	5.98	7.02	6.15	6.15	6.83	1.98	2.9	3.11	2.84	3.47	6.426	2.86	-1.16791	2.09754e-15	3.84487e-14	fng	PREDICTED: fringe glycosyltransferase isoform X1 [Bactrocera dorsalis]	Human Diseases;Environmental Information Processing;Metabolism	Infectious diseases;Signal transduction;Glycan biosynthesis and metabolism	ko05165//Human papillomavirus infection;ko04330//Notch signaling pathway;ko00514//Other types of O-glycan biosynthesis	K05948;K05948;K05948	GO:0031228//intrinsic component of Golgi membrane	GO:0008375//acetylglucosaminyltransferase activity	-
LOC105231412	205	120	106	117	161	26	38	56	26	32	14.95	8.77	9.81	10.36	12.86	1.77	2.36	4.46	2	2.33	11.35	2.584	-2.13501	2.72814e-15	4.96433e-14	eloF	PREDICTED: elongation of very long chain fatty acids protein F-like [Bactrocera dorsalis]	-	-	-	-	GO:0031224//intrinsic component of membrane	GO:0003824//catalytic activity	GO:0006631//fatty acid metabolic process
LOC105226210	181	145	160	75	177	40	59	22	34	44	6.96	5.59	7.8	3.5	7.45	1.44	1.93	0.92	1.38	1.69	6.26	1.472	-2.08838	2.78694e-15	5.05659e-14	-	-	-	-	-	-	-	-	-
LOC105222184	647	558	633	449	538	343	297	258	254	370	56.21	48.6	69.79	47.36	51.21	27.86	21.99	24.49	23.23	32.03	54.634	25.92	-1.07573	3.19805e-15	5.76064e-14	--	PREDICTED: thymosin beta [Bactrocera dorsalis]	-	-	-	-	GO:0044444//cytoplasmic part	GO:0003779//actin binding	GO:0009886//post-embryonic morphogenesis;GO:0030036//actin cytoskeleton organization
LOC105231214	793	1188	709	1055	557	375	425	328	291	294	13.56	20.37	15.33	21.89	10.43	5.98	6.2	6.11	5.23	5.02	16.316	5.708	-1.51523	3.3086e-15	5.93409e-14	SOCS5	PREDICTED: mucin-5AC [Bactrocera dorsalis]	Organismal Systems;Environmental Information Processing	Endocrine system;Signal transduction	ko04917//Prolactin signaling pathway;ko04630//Jak-STAT signaling pathway	K04698;K04698	-	-	-
LOC105228879	85	87	65	100	51	243	284	231	209	201	7.13	7.31	6.92	10.18	4.69	19.05	20.3	21.17	18.45	16.8	7.246	19.154	1.40239	4.3854e-15	7.78705e-14	FAR1	PREDICTED: fatty acyl-CoA reductase 1 isoform X2 [Bactrocera cucurbitae]	Cellular Processes;Organismal Systems;Metabolism	Transport and catabolism;Aging;Lipid metabolism	ko04146//Peroxisome;ko04212//Longevity regulating pathway - worm;ko00073//Cutin, suberine and wax biosynthesis	K13356;K13356;K13356	-	GO:0016620//oxidoreductase activity, acting on the aldehyde or oxo group of donors, NAD or NADP as acceptor	GO:0044710//single-organism metabolic process
LOC105232651	53	63	20	71	37	220	215	254	210	270	1.8	2.15	0.86	2.93	1.38	6.99	6.23	9.43	7.51	9.15	1.824	7.862	2.10779	4.69306e-15	8.2862e-14	Smox	PREDICTED: spermine oxidase [Bactrocera dorsalis]	-	-	-	-	-	-	GO:0044710//single-organism metabolic process
LOC105223655	135	105	95	85	57	375	526	239	275	300	4.94	3.85	4.41	3.78	2.29	12.83	16.41	9.56	10.59	10.94	3.854	12.066	1.64652	4.98875e-15	8.79585e-14	-	-	-	-	-	-	-	-	-
LOC105232111	87	91	84	83	105	41	47	27	38	37	2.11	2.22	2.59	2.45	2.79	0.93	0.97	0.72	0.97	0.9	2.432	0.898	-1.43736	5.65506e-15	9.94256e-14	--	PREDICTED: transcription factor SPT20 homolog [Bactrocera dorsalis]	-	-	-	-	-	-	-
LOC115065834	1507	1579	1469	1128	2052	991	906	740	785	930	108.8	114.27	134.57	98.86	162.29	66.88	55.74	58.37	59.65	66.9	123.758	61.508	-1.00868	6.23806e-15	1.09214e-13	Ggct	PREDICTED: gamma-glutamylcyclotransferase-like [Bactrocera cucurbitae]	Metabolism;Metabolism	Global and overview maps;Metabolism of other amino acids	ko01100//Metabolic pathways;ko00480//Glutathione metabolism	K00682;K00682	-	-	-
LOC105233570	11	11	16	12	10	66	95	64	42	78	0.93	0.93	1.71	1.23	0.92	5.19	6.82	5.89	3.72	6.54	1.144	5.632	2.29956	9.51814e-15	1.64792e-13	--	PREDICTED: uncharacterized protein LOC105233570 [Bactrocera dorsalis]	-	-	-	-	-	-	-
LOC105227402	103	104	76	91	80	33	46	37	44	33	2.07	2.09	1.79	2.17	1.73	0.62	0.77	0.81	0.93	0.66	1.97	0.758	-1.37793	1.52542e-14	2.60847e-13	--	PREDICTED: zinc finger protein sens [Bactrocera dorsalis]	-	-	-	-	-	-	GO:0006897//endocytosis
LOC105229527	834	1154	997	381	1484	298	334	224	295	236	35.61	49.4	54.02	19.75	69.42	11.9	12.16	10.45	13.26	10.04	45.64	11.562	-1.98091	1.65593e-14	2.82005e-13	--	CG11892, partial [Drosophila yakuba]	-	-	-	-	-	GO:0016740//transferase activity	-
LOC105223667	52	55	52	72	65	142	204	184	195	206	0.43	0.46	0.55	0.73	0.59	1.11	1.45	1.67	1.71	1.71	0.552	1.53	1.47079	1.85396e-14	3.14442e-13	--	PREDICTED: mucin-17, partial [Bactrocera dorsalis]	-	-	-	-	-	-	-
LOC105231062	206	250	201	91	186	43	86	43	47	58	11.68	14.09	14.6	6.3	11.38	2.43	4.22	2.77	2.94	3.58	11.61	3.188	-1.86464	1.89471e-14	3.19617e-13	--	PREDICTED: high affinity copper uptake protein 1 isoform X1 [Bactrocera dorsalis]	Human Diseases;Organismal Systems	Drug resistance;Digestive system	ko01524//Platinum drug resistance;ko04978//Mineral absorption	K14686;K14686	-	-	-
LOC105224657	3238	5106	3346	4334	3591	1983	2607	2133	2044	1831	94.7	149.69	124.17	153.88	115.05	54.21	64.98	68.16	62.92	53.36	127.498	60.726	-1.07009	1.98863e-14	3.35008e-13	Spn42Dd	PREDICTED: serine protease inhibitor 42Dd [Bactrocera dorsalis]	Organismal Systems	Immune system	ko04624//Toll and Imd signaling pathway	K20698	-	-	-
LOC105224821	22	43	41	41	48	164	163	141	111	129	0.7	1.37	1.65	1.58	1.67	4.87	4.42	4.9	3.71	4.09	1.394	4.398	1.65762	2.10949e-14	3.54411e-13	--	PREDICTED: slit homolog 2 protein [Bactrocera dorsalis]	-	-	-	-	-	-	-
LOC105232324	157	176	151	123	147	82	90	76	73	96	8	8.88	9.76	7.56	8.21	3.87	3.91	4.19	3.92	4.84	8.482	4.146	-1.03268	2.76922e-14	4.62759e-13	--	PREDICTED: DNA-binding protein RFXANK [Bactrocera dorsalis]	-	-	-	-	-	-	-
LOC105224717	29	38	41	31	56	2	8	4	4	3	0.54	0.74	1.05	0.71	1.14	0.04	0.13	0.09	0.09	0.06	0.836	0.082	-3.34981	2.96847e-14	4.94072e-13	--	GH20979 [Drosophila grimshawi]	-	-	-	-	-	-	-
LOC105223550	138	145	83	79	109	51	56	31	45	32	6.05	6.37	4.62	4.2	5.23	2.09	2.09	1.48	2.08	1.4	5.294	1.828	-1.53409	3.55649e-14	5.88022e-13	Dnase2	PREDICTED: deoxyribonuclease-2-alpha [Bactrocera dorsalis]	Cellular Processes	Transport and catabolism	ko04142//Lysosome	K01158	-	-	-
LOC115066711	103	103	86	80	59	197	306	260	225	215	14.66	14.7	15.53	13.82	9.2	26.21	37.12	40.44	33.71	30.5	13.582	33.596	1.30659	4.1391e-14	6.80742e-13	--	Protein spaetzle [Bactrocera dorsalis]	Organismal Systems	Immune system	ko04624//Toll and Imd signaling pathway	K20694	-	-	-
LOC105225270	170	136	125	96	97	60	59	37	59	46	3.94	3.16	3.67	2.7	2.46	1.3	1.16	0.94	1.44	1.06	3.186	1.18	-1.43296	8.28807e-14	1.33842e-12	Eip74EF	PREDICTED: ecdysone-induced protein 74EF [Bactrocera dorsalis]	Cellular Processes	Cell growth and death	ko04214//Apoptosis - fly	K09428	-	-	-
LOC105229667	226	259	204	190	284	157	163	110	113	119	35.12	40.27	40.11	35.7	48.25	22.79	21.53	18.62	18.41	18.34	39.89	19.938	-1.00051	8.69879e-14	1.39932e-12	CG7637	PREDICTED: H/ACA ribonucleoprotein complex subunit 3 [Bactrocera dorsalis]	Genetic Information Processing	Translation	ko03008//Ribosome biogenesis in eukaryotes	K11130	GO:0005732//small nucleolar ribonucleoprotein complex	GO:0003723//RNA binding	GO:0022613//ribonucleoprotein complex biogenesis;GO:0033554//cellular response to stress
LOC105226472	108	75	80	79	100	243	386	181	203	288	6.41	4.47	6.03	5.7	6.51	13.49	19.54	11.75	12.69	17.05	5.824	14.904	1.35562	9.87454e-14	1.57828e-12	--	CG34454, partial [Drosophila busckii]	-	-	-	-	-	-	-
LOC105232390	498	457	402	289	600	971	1600	1342	1027	1094	32.64	30.02	33.43	22.99	43.07	59.48	89.36	96.09	70.84	71.44	32.43	77.442	1.25579	1.08782e-13	1.72984e-12	--	PREDICTED: uncharacterized protein LOC105232390 [Bactrocera dorsalis]	-	-	-	-	-	-	-
LOC105230849	235	234	246	74	163	37	33	55	37	21	12.62	12.59	16.76	4.82	9.59	1.86	1.51	3.23	2.09	1.12	11.276	1.962	-2.52286	1.29115e-13	2.04536e-12	--	CG4115 [Drosophila melanogaster]	-	-	-	-	-	-	-
LOC105224758	110	122	87	97	126	57	63	48	52	37	10.42	11.58	10.45	11.15	13.07	5.05	5.08	4.97	5.18	3.49	11.334	4.754	-1.25344	1.43592e-13	2.27182e-12	--	GH16385 [Drosophila grimshawi]	-	-	-	-	-	-	-
LOC105230358	40	57	26	35	40	2	10	4	8	5	0.91	1.3	0.75	0.97	1	0.04	0.19	0.1	0.19	0.11	0.986	0.126	-2.96816	1.46924e-13	2.32159e-12	--	Pentraxin-related protein PTX3, partial [Ceratitis capitata]	-	-	-	-	-	-	-
LOC105226113	52	56	66	33	25	161	245	166	178	156	0.64	0.69	1.03	0.5	0.34	1.85	2.56	2.22	2.29	1.91	0.64	2.166	1.75889	1.48976e-13	2.35103e-12	--	Zinc finger protein 26, partial [Bactrocera dorsalis]	-	-	-	-	-	-	-
LOC105231434	97	133	92	84	197	40	44	24	34	32	1.29	1.77	1.55	1.36	2.87	0.5	0.5	0.35	0.48	0.42	1.768	0.45	-1.97412	1.52091e-13	2.39716e-12	-	-	-	-	-	-	-	-	-
LOC105232733	249	179	173	173	166	787	1744	406	714	634	22.56	16.26	19.89	19.03	16.48	66.67	134.69	40.2	68.1	57.25	18.844	73.382	1.96132	1.58149e-13	2.4895e-12	Lcp65Ag2	PREDICTED: larval cuticle protein 8-like [Bactrocera dorsalis]	-	-	-	-	-	GO:0005214//structural constituent of chitin-based cuticle	GO:0042335//cuticle development
LOC105227882	1	5	4	1	2	32	60	32	30	40	0.06	0.32	0.32	0.08	0.14	1.9	3.24	2.22	2	2.53	0.184	2.378	3.69197	1.84794e-13	2.89348e-12	SDR-1	PREDICTED: farnesol dehydrogenase-like [Bactrocera dorsalis]	Metabolism;Metabolism	Metabolism of terpenoids and polyketides;Metabolism of terpenoids and polyketides	ko00981//Insect hormone biosynthesis;ko00900//Terpenoid backbone biosynthesis	K15890;K15890	-	-	-
LOC105229374	337	521	431	366	505	1069	1489	1292	970	867	10.67	16.53	17.31	14.07	17.51	31.63	40.17	44.69	32.32	27.35	15.218	35.232	1.21111	1.84971e-13	2.89348e-12	acsf2	PREDICTED: LOW QUALITY PROTEIN: acyl-CoA synthetase family member 2, mitochondrial-like [Bactrocera dorsalis]	-	-	-	-	-	-	-
LOC105227697	7132	5108	5745	5813	6884	2881	3877	3937	2877	2634	380.08	272.88	388.49	376.08	401.89	143.52	176.09	229.25	161.37	139.88	363.884	170.022	-1.09776	2.01014e-13	3.13265e-12	--	PREDICTED: uncharacterized protein LOC105227697 [Bactrocera dorsalis]	-	-	-	-	-	-	-
LOC105224770	1471	2462	958	2879	1476	8754	11828	9270	9954	11479	33.95	56.96	28.05	80.66	37.32	188.86	232.64	233.76	241.79	263.99	47.388	232.208	2.29282	2.12146e-13	3.28563e-12	-	-	-	-	-	-	-	-	-
MSTRG.2080	31	24	51	32	50	0	0	1	0	0	4.49	3.49	9.38	5.63	7.94	0	0	0.16	0	0	6.186	0.032	-7.59479	2.53523e-13	3.90225e-12	--	PREDICTED: uncharacterized protein LOC106616958 isoform X2 [Bactrocera oleae]	-	-	-	-	-	-	-
LOC105226386	51	53	48	26	40	10	6	9	5	12	0.61	0.64	0.73	0.38	0.52	0.11	0.06	0.12	0.06	0.14	0.576	0.098	-2.55522	2.58737e-13	3.9776e-12	--	PREDICTED: flocculation protein FLO11 [Bactrocera latifrons]	-	-	-	-	-	-	-
LOC109579562	10	47	31	23	36	138	167	149	153	129	0.63	2.99	2.5	1.77	2.5	8.18	9.03	10.33	10.21	8.15	2.078	9.18	2.1433	2.66887e-13	4.09281e-12	to	PREDICTED: protein takeout-like [Bactrocera dorsalis]	-	-	-	-	-	-	-
LOC105222290	118	75	118	105	91	289	334	236	215	271	3.04	1.94	3.86	3.28	2.57	6.96	7.33	6.64	5.83	6.95	2.938	6.742	1.19834	3.46993e-13	5.28233e-12	--	PREDICTED: caprin homolog [Bactrocera dorsalis]	-	-	-	-	-	-	-
LOC105234183	42	48	32	48	48	3	12	3	2	0	2.66	3.04	2.57	3.69	3.33	0.18	0.65	0.21	0.13	0	3.058	0.234	-3.70801	3.81131e-13	5.79495e-12	--	PREDICTED: protein takeout [Bactrocera dorsalis]	-	-	-	-	-	-	-
LOC105233810	3160	5672	4883	2875	3257	16018	11743	19503	15606	21366	112.88	203.11	221.34	124.68	127.46	534.89	357.51	761.24	586.75	760.56	157.894	600.19	1.92646	3.82443e-13	5.80783e-12	Cyp6g2	probable cytochrome P450 6g2 [Bactrocera dorsalis]	-	-	-	-	-	-	-
LOC105226519	1135	1009	927	919	1353	479	617	679	511	449	30.43	27.12	31.54	29.91	39.74	12	14.1	19.89	14.42	12	31.748	14.482	-1.1324	3.86893e-13	5.86827e-12	ea	Serine protease easter, partial [Bactrocera dorsalis]	-	-	-	-	-	-	-
LOC105231831	372	238	177	217	263	78	118	121	88	116	15.98	10.25	9.65	11.32	12.38	3.13	4.32	5.68	3.98	4.97	11.916	4.416	-1.43209	3.97825e-13	6.02675e-12	--	PREDICTED: transmembrane protein 135-like [Rhagoletis zephyria]	-	-	-	-	-	-	-
LOC105232731	147	251	205	233	278	38	84	81	50	34	11.96	20.47	21.16	23.02	24.78	2.89	5.82	7.2	4.28	2.76	20.278	4.59	-2.14335	4.00676e-13	6.06259e-12	--	PREDICTED: endocuticle structural glycoprotein SgAbd-5 [Bactrocera dorsalis]	-	-	-	-	-	-	-
LOC105230256	178	207	206	171	196	104	110	107	115	94	4.73	5.52	6.95	5.52	5.71	2.59	2.49	3.11	3.22	2.49	5.686	2.78	-1.03233	4.0582e-13	6.133e-12	ARRDC1	PREDICTED: arrestin domain-containing protein 3 [Bactrocera dorsalis]	-	-	-	-	-	-	-
LOC105227847	470	506	271	278	364	197	206	202	200	217	9.7	10.46	7.09	6.96	8.23	3.8	3.62	4.55	4.34	4.46	8.488	4.154	-1.03092	4.82484e-13	7.22164e-12	PLPP3	GH16692 [Drosophila grimshawi]	Metabolism;Environmental Information Processing;Human Diseases;Metabolism;Organismal Systems;Metabolism;Metabolism;Organismal Systems;Metabolism	Global and overview maps;Signal transduction;Cancers;Lipid metabolism;Immune system;Lipid metabolism;Lipid metabolism;Digestive system;Lipid metabolism	ko01100//Metabolic pathways;ko04072//Phospholipase D signaling pathway;ko05231//Choline metabolism in cancer;ko00564//Glycerophospholipid metabolism;ko04666//Fc gamma R-mediated phagocytosis;ko00561//Glycerolipid metabolism;ko00600//Sphingolipid metabolism;ko04975//Fat digestion and absorption;ko00565//Ether lipid metabolism	K01080;K01080;K01080;K01080;K01080;K01080;K01080;K01080;K01080	-	-	-
LOC105228662	142	141	97	121	112	60	79	65	62	63	3.09	3.08	2.68	3.2	2.67	1.22	1.46	1.55	1.42	1.37	2.944	1.404	-1.06823	5.0923e-13	7.59464e-12	wdhd1	PREDICTED: WD repeat and HMG-box DNA-binding protein 1 [Bactrocera dorsalis]	-	-	-	-	-	-	-
LOC105233883	39	40	72	124	47	0	2	1	0	0	2.72	2.79	6.36	10.49	3.59	0	0.12	0.08	0	0	5.19	0.04	-7.01959	5.17481e-13	7.70849e-12	LCP17	PREDICTED: endocuticle structural glycoprotein ABD-4 [Bactrocera dorsalis]	-	-	-	-	-	-	-
LOC105229055	313	356	235	255	172	659	771	474	612	640	3.45	3.93	3.28	3.41	2.07	6.78	7.24	5.7	7.09	7.02	3.228	6.766	1.06766	5.24192e-13	7.79915e-12	USP10	PREDICTED: alpha-protein kinase 1 [Bactrocera dorsalis]	-	-	-	-	-	-	-
LOC105230034	233	241	210	205	325	572	1101	550	592	578	16.9	17.52	19.32	18.05	25.82	38.77	68.04	43.58	45.18	41.77	19.522	47.468	1.28185	6.14126e-13	9.10468e-12	rgn	Regucalcin [Bactrocera dorsalis]	-	-	-	-	-	-	-
LOC105229882	42	48	25	46	103	3	8	1	6	2	1.69	1.93	1.27	2.24	4.53	0.11	0.27	0.04	0.25	0.08	2.332	0.15	-3.95853	6.82934e-13	1.00888e-11	snk	PREDICTED: serine protease Hayan [Bactrocera dorsalis]	-	-	-	-	-	GO:0070011//peptidase activity, acting on L-amino acid peptides	-
LOC105226807	223	286	223	370	289	638	831	784	904	802	4.47	5.75	5.67	9	6.35	11.95	14.19	17.17	19.07	16.02	6.248	15.68	1.32746	7.03505e-13	1.03804e-11	-	-	-	-	-	-	-	-	-
LOC105229310	18	22	12	17	23	62	70	74	58	77	0.36	0.45	0.31	0.42	0.51	1.17	1.21	1.64	1.24	1.55	0.41	1.362	1.73203	7.04462e-13	1.03823e-11	GRIK1	PREDICTED: glutamate receptor ionotropic, kainate 2 [Bactrocera dorsalis]	-	-	-	-	GO:0031224//intrinsic component of membrane;GO:0097060//synaptic membrane	GO:0005231//excitatory extracellular ligand-gated ion channel activity	GO:0006811//ion transport;GO:0007215//glutamate receptor signaling pathway
LOC105231415	55	76	122	61	130	7	0	13	4	10	2.36	3.27	6.64	3.17	6.11	0.28	0	0.61	0.18	0.43	4.31	0.3	-3.84465	8.36107e-13	1.22645e-11	Ccp84Ab	Larval cuticle protein A2B, partial [Bactrocera dorsalis]	-	-	-	-	-	-	-
LOC105225550	198	163	132	131	123	81	81	45	79	49	4.36	3.6	3.69	3.5	2.97	1.67	1.52	1.08	1.83	1.08	3.624	1.436	-1.33553	8.78966e-13	1.2863e-11	TMEM201	Transmembrane protein 201 [Bactrocera dorsalis]	-	-	-	-	-	-	-
LOC105229772	77	81	60	125	82	209	423	310	300	312	7.15	7.54	7.07	14.04	8.34	18.13	33.46	31.44	29.3	28.85	8.828	28.236	1.67738	9.08876e-13	1.32696e-11	--	PREDICTED: acanthoscurrin-2-like isoform X1 [Bactrocera dorsalis]	-	-	-	-	-	-	-
LOC105225192	377	413	244	213	322	582	872	815	661	752	17.42	19.13	14.31	11.95	16.3	25.14	34.34	41.15	32.15	34.63	15.822	33.482	1.08145	9.81815e-13	1.42678e-11	Prss36	PREDICTED: trypsin [Bactrocera dorsalis]	-	-	-	-	-	-	-
LOC105222733	108	102	119	82	88	37	59	31	40	28	2.42	2.29	3.38	2.23	2.16	0.77	1.13	0.76	0.94	0.62	2.496	0.844	-1.5643	1.14931e-12	1.66243e-11	ATOH8	PREDICTED: probable maltase-glucoamylase-like protein [Ceratitis capitata]	-	-	-	-	-	-	-
LOC105226488	130	140	135	138	114	260	578	435	381	338	3.01	3.25	3.96	3.88	2.89	5.63	11.4	11	9.28	7.8	3.398	9.022	1.40876	1.3538e-12	1.9537e-11	st	PREDICTED: protein scarlet [Bactrocera dorsalis]	-	-	-	-	-	GO:0017111//nucleoside-triphosphatase activity;GO:0032550//purine ribonucleoside binding	GO:0051234//establishment of localization
LOC105225697	48	42	33	27	52	0	1	0	0	1	1.92	1.68	1.67	1.31	2.28	0	0.03	0	0	0.04	1.772	0.014	-6.98381	1.42363e-12	2.04736e-11	--	PREDICTED: uncharacterized transmembrane protein DDB_G0289901-like [Bactrocera dorsalis]	-	-	-	-	-	-	-
LOC105224463	16	13	7	10	5	53	62	37	72	56	0.43	0.35	0.24	0.33	0.15	1.33	1.42	1.09	2.04	1.5	0.3	1.476	2.29866	1.55811e-12	2.2382e-11	TkR99D	PREDICTED: prolactin-releasing peptide receptor [Bactrocera dorsalis]	-	-	-	-	GO:0031224//intrinsic component of membrane	GO:0008188//neuropeptide receptor activity	GO:0007186//G-protein coupled receptor signaling pathway
LOC105226273	219	235	177	261	198	489	487	629	518	643	3.81	4.1	3.91	5.52	3.78	7.96	7.23	11.97	9.49	11.16	4.224	9.562	1.1787	2.01937e-12	2.87433e-11	adt-1	A disintegrin and metalloproteinase with thrombospondin motifs 8, partial [Bactrocera dorsalis]	-	-	-	-	-	GO:0046914//transition metal ion binding;GO:0070011//peptidase activity, acting on L-amino acid peptides	GO:0007166//cell surface receptor signaling pathway;GO:0019538//protein metabolic process
LOC105225976	2785	3129	1539	2147	1746	6270	11449	4088	6031	5950	46.67	52.88	32.92	43.64	32.1	98.56	163.69	74.9	107.16	99.65	41.642	108.792	1.38546	2.16419e-12	3.07044e-11	Slc12a2	PREDICTED: bumetanide-sensitive sodium-(potassium)-chloride cotransporter [Bactrocera dorsalis]	Organismal Systems;Organismal Systems;Human Diseases	Digestive system;Digestive system;Infectious diseases	ko04972//Pancreatic secretion;ko04970//Salivary secretion;ko05110//Vibrio cholerae infection	K10951;K10951;K10951	GO:0031224//intrinsic component of membrane	GO:0015377//cation:chloride symporter activity;GO:0046943//carboxylic acid transmembrane transporter activity	GO:0006821//chloride transport;GO:0006865//amino acid transport;GO:0044763//single-organism cellular process
LOC105234180	158	130	98	118	161	304	318	354	248	354	12.92	10.66	10.17	11.71	14.42	23.24	22.16	31.63	21.34	28.85	11.976	25.444	1.08718	2.17081e-12	3.07584e-11	-	-	-	-	-	-	-	-	-
[truncated: 513 more rows]

## Sheet: Frucose vs Frucose+YH
id	Frucose-1_count	Frucose-2_count	Frucose-3_count	Frucose-4_count	Frucose-5_count	Frucose-yeast-1_count	Frucose-yeast-2_count	Frucose-yeast-3_count	Frucose-yeast-4_count	Frucose-yeast-5_count	Frucose-1_fpkm	Frucose-2_fpkm	Frucose-3_fpkm	Frucose-4_fpkm	Frucose-5_fpkm	Frucose-yeast-1_fpkm	Frucose-yeast-2_fpkm	Frucose-yeast-3_fpkm	Frucose-yeast-4_fpkm	Frucose-yeast-5_fpkm	Frucose_mean	Frucose-yeast_mean	log2(fc)	PValue	FDR	Symbol	Description	KEGG_A_class	KEGG_B_class	Pathway	K_ID	GO Component	GO Function	GO Process
[truncated: 746 more rows]
