# Supplementary material for: Protein feeding mediates sex pheromone biosynthesis in an insect
Source: eLife. 2023 Jan 19;12:e83469. doi: 10.7554/eLife.83469 (PMC9908074; doi:10.7554/eLife.83469)
Supplement: Supplementary file 5. [file elife-83469-supp5.xlsx]

## Sheet: Sucrose vs Sucrose+YH
KEGG_A_class	KEGG_B_class	Pathway	Sucrose-vs-Sucrose-YH (151)	All (3266)	Pvalue	Qvalue	Pathway ID	Genes	K_IDs
Metabolism	Metabolism of terpenoids and polyketides	Insect hormone biosynthesis	12	37	4.21017e-08	9.93601e-06	ko00981	LOC105223822(SDR-1);LOC105223823(--);LOC105223827(SDR-1);LOC105224512(Aldh1b1);LOC105224923(phm);LOC105224924(Cyp18a1);LOC105225180(pho2);LOC105225181(PGLP2);LOC105227167(PKS19);LOC105227882(SDR-1);LOC105229967(Ces2a);LOC105229968(Est-5A)	K15890+K15890+K15890+K00128+K10720+K14985+K21013+K21013+K10718+K15890+K01063+K01063
Metabolism	Lipid metabolism	Cutin, suberine and wax biosynthesis	5	10	4.13105e-05	0.00487464	ko00073	LOC105222769(wat);LOC105225825(wat);LOC105226693(far1);LOC105228879(FAR1);LOC105230858(far1)	K13356+K13356+K13356+K13356+K13356
Metabolism	Xenobiotics biodegradation and metabolism	Drug metabolism - cytochrome P450	10	57	0.000219167	0.0129309	ko00982	LOC105225817(GstD1);LOC105227725(GST1);LOC105228298(GSTT1);LOC105229550(UGT2A1);LOC105229681(GST1);LOC105229690(GstD1);LOC105230262(UGT8);LOC105231227(UGT2B20);LOC115065792(UGT2B13);LOC115066658(--)	K00799+K00799+K00799+K00699+K00799+K00799+K00699+K00699+K00699+K00699
Human Diseases	Cancers	Chemical carcinogenesis	10	57	0.000219167	0.0129309	ko05204	LOC105225817(GstD1);LOC105227725(GST1);LOC105228298(GSTT1);LOC105229550(UGT2A1);LOC105229681(GST1);LOC105229690(GstD1);LOC105230262(UGT8);LOC105231227(UGT2B20);LOC115065792(UGT2B13);LOC115066658(--)	K00799+K00799+K00799+K00699+K00799+K00799+K00699+K00699+K00699+K00699
Metabolism	Xenobiotics biodegradation and metabolism	Metabolism of xenobiotics by cytochrome P450	10	60	0.000339458	0.0152519	ko00980	LOC105225817(GstD1);LOC105227725(GST1);LOC105228298(GSTT1);LOC105229550(UGT2A1);LOC105229681(GST1);LOC105229690(GstD1);LOC105230262(UGT8);LOC105231227(UGT2B20);LOC115065792(UGT2B13);LOC115066658(--)	K00799+K00799+K00799+K00699+K00799+K00799+K00699+K00699+K00699+K00699
Metabolism	Xenobiotics biodegradation and metabolism	Drug metabolism - other enzymes	12	84	0.00038776	0.0152519	ko00983	LOC105225817(GstD1);LOC105227725(GST1);LOC105228298(GSTT1);LOC105229550(UGT2A1);LOC105229681(GST1);LOC105229690(GstD1);LOC105230262(UGT8);LOC105230669(RnrS);LOC105230951(XDH);LOC105231227(UGT2B20);LOC115065792(UGT2B13);LOC115066658(--)	K00799+K00799+K00799+K00699+K00799+K00799+K00699+K10808+K00106+K00699+K00699+K00699
Metabolism	Carbohydrate metabolism	Ascorbate and aldarate metabolism	7	32	0.000498165	0.0167953	ko00053	LOC105224512(Aldh1b1);LOC105226135(miox);LOC105229550(UGT2A1);LOC105230262(UGT8);LOC105231227(UGT2B20);LOC115065792(UGT2B13);LOC115066658(--)	K00128+K00469+K00699+K00699+K00699+K00699+K00699
Cellular Processes	Transport and catabolism	Peroxisome	11	78	0.000762646	0.022498	ko04146	LOC105222327(GLO5);LOC105222769(wat);LOC105224810(Idh1);LOC105225825(wat);LOC105226693(far1);LOC105228879(FAR1);LOC105229424(mpv17l);LOC105229660(daao-1);LOC105230858(far1);LOC105230951(XDH);LOC105233107(MPV17L)	K11517+K13356+K00031+K13356+K13356+K13356+K13349+K00272+K13356+K00106+K13348
Human Diseases	Drug resistance	Platinum drug resistance	8	48	0.00135161	0.0354422	ko01524	LOC105225577(Pdk1);LOC105225817(GstD1);LOC105227371(POLH);LOC105227725(GST1);LOC105228298(GSTT1);LOC105229681(GST1);LOC105229690(GstD1);LOC105231062(--)	K06276+K00799+K03509+K00799+K00799+K00799+K00799+K14686
Metabolism	Amino acid metabolism	Tyrosine metabolism	5	21	0.00220403	0.0485671	ko00350	LOC105224730(Hpd);LOC105224873(FAH);LOC105225839(GstZ2);LOC105230711(Tat);LOC105233819(hgo)	K00457+K01555+K01800+K00815+K00451
Organismal Systems	Endocrine system	Renin-angiotensin system	4	13	0.00226372	0.0485671	ko04614	LOC105229185(--);LOC105230937(Anpep);LOC105232277(Ance);LOC105233746(ANPEP)	K01283+K11140+K01283+K11141
Organismal Systems	Aging	Longevity regulating pathway - worm	10	77	0.0025094	0.0493514	ko04212	LOC105222769(wat);LOC105225817(GstD1);LOC105225825(wat);LOC105226693(far1);LOC105227725(GST1);LOC105228298(GSTT1);LOC105228879(FAR1);LOC105229681(GST1);LOC105229690(GstD1);LOC105230858(far1)	K13356+K00799+K13356+K13356+K00799+K00799+K13356+K00799+K00799+K13356
Metabolism	Global and overview maps	Metabolic pathways	56	882	0.00355335	0.064507	ko01100	LOC105222009(GlyP);LOC105222215(v1g246094);LOC105222327(GLO5);LOC105222791(--);LOC105222926(Gdh);LOC105222986(CHIA);LOC105223108(HMT-1);LOC105223217(GLB1);LOC105223744(bwa);LOC105224017(Arsb);LOC105224512(Aldh1b1);LOC105224532(PLA2);LOC105224730(Hpd);LOC105224810(Idh1);LOC105224873(FAH);LOC105225237(Oat);LOC105225353(AANAT1);LOC105225673(C1GalTA);LOC105225674(C1GalTA);LOC105225803(gpmA);LOC105225…	K00688+K00826+K11517+K00072+K00261+K01183+K00547+K12309+K01441+K01135+K00128+K01047+K00457+K00031+K01555+K00819+K00669+K00731+K00731+K01834+K01800+K01077+K10249+K01077+K00827+K00728+K07127+K02154+K01080+K01080+K13247+K00314+K13240+K12373+K01594+K00699+K14677+K00699+K10808+K00815+K11140+K00106+K00365+K00699+K00472+K01047+K00933+K01435+K19572+K19572+K01953+K00451+K01183+K00699+K01183+K00699
Metabolism	Metabolism of other amino acids	Glutathione metabolism	8	59	0.00516094	0.0869986	ko00480	LOC105224810(Idh1);LOC105225817(GstD1);LOC105227725(GST1);LOC105228298(GSTT1);LOC105229681(GST1);LOC105229690(GstD1);LOC105230669(RnrS);LOC105230937(Anpep)	K00031+K00799+K00799+K00799+K00799+K00799+K10808+K11140
Organismal Systems	Digestive system	Fat digestion and absorption	5	26	0.0059104	0.0929902	ko04975	LOC105224532(PLA2);LOC105227848(PLPP1);LOC105227849(Plpp2);LOC105231309(SLC27A4);LOC105232034(--)	K01047+K01080+K01080+K08745+K01047
Metabolism	Lipid metabolism	Steroid hormone biosynthesis	5	28	0.00819692	0.109027	ko00140	LOC105229550(UGT2A1);LOC105230262(UGT8);LOC105231227(UGT2B20);LOC115065792(UGT2B13);LOC115066658(--)	K00699+K00699+K00699+K00699+K00699
Human Diseases	Cardiovascular diseases	Fluid shear stress and atherosclerosis	9	77	0.00827823	0.109027	ko05418	LOC105225122(dpp);LOC105225817(GstD1);LOC105226824(Cp1);LOC105227725(GST1);LOC105228298(GSTT1);LOC105229681(GST1);LOC105229690(GstD1);LOC105232205(--);LOC105232835(Ctla2a)	K04662+K00799+K01365+K00799+K00799+K00799+K00799+K10456+K01365
Cellular Processes	Transport and catabolism	Lysosome	11	105	0.00831562	0.109027	ko04142	LOC105223217(GLB1);LOC105223550(Dnase2);LOC105223565(--);LOC105224017(Arsb);LOC105224023(CLN3);LOC105226824(Cp1);LOC105227818(ATP6V0A1);LOC105227880(mfsd8);LOC105229216(HEXB);LOC105232835(Ctla2a);LOC105233670(--)	K12309+K01158+K12383+K01135+K12389+K01365+K02154+K12307+K12373+K01365+K19363
Metabolism	Glycan biosynthesis and metabolism	Other types of O-glycan biosynthesis	3	12	0.0156652	0.194578	ko00514	LOC105221842(fng);LOC105224723(GA16561);LOC105227401(rt)	K05948+K11703+K00728
Metabolism	Lipid metabolism	Ether lipid metabolism	4	22	0.0167444	0.197583	ko00565	LOC105224532(PLA2);LOC105227848(PLPP1);LOC105227849(Plpp2);LOC105232034(--)	K01047+K01080+K01080+K01047
Metabolism	Metabolism of cofactors and vitamins	Retinol metabolism	5	34	0.0185807	0.208811	ko00830	LOC105229550(UGT2A1);LOC105230262(UGT8);LOC105231227(UGT2B20);LOC115065792(UGT2B13);LOC115066658(--)	K00699+K00699+K00699+K00699+K00699
Metabolism	Carbohydrate metabolism	Pentose and glucuronate interconversions	6	49	0.0238858	0.219942	ko00040	LOC105228395(CRYL1);LOC105229550(UGT2A1);LOC105230262(UGT8);LOC105231227(UGT2B20);LOC115065792(UGT2B13);LOC115066658(--)	K13247+K00699+K00699+K00699+K00699+K00699
Human Diseases	Cancers	Prostate cancer	7	63	0.0247122	0.219942	ko05215	LOC105225577(Pdk1);LOC105225817(GstD1);LOC105227725(GST1);LOC105228298(GSTT1);LOC105229681(GST1);LOC105229690(GstD1);LOC105230971(InR)	K06276+K00799+K00799+K00799+K00799+K00799+K05087
Metabolism	Amino acid metabolism	Alanine, aspartate and glutamate metabolism	4	25	0.0260158	0.219942	ko00250	LOC105222926(Gdh);LOC105227212(AGXT2);LOC105229660(daao-1);LOC105232726(ASN2)	K00261+K00827+K00272+K01953
Metabolism	Amino acid metabolism	Arginine and proline metabolism	5	37	0.02606	0.219942	ko00330	LOC105224512(Aldh1b1);LOC105225237(Oat);LOC105229149(Nos);LOC105231755(P4HA2);LOC105232635(Argk)	K00128+K00819+K13240+K00472+K00933
Metabolism	Biosynthesis of other secondary metabolites	Caffeine metabolism	2	6	0.0281757	0.219942	ko00232	LOC105230951(XDH);LOC105231184(Uro)	K00106+K00365
Metabolism	Amino acid metabolism	Phenylalanine metabolism	2	6	0.0281757	0.219942	ko00360	LOC105224730(Hpd);LOC105230711(Tat)	K00457+K00815
Metabolism	Lipid metabolism	Linoleic acid metabolism	2	6	0.0281757	0.219942	ko00591	LOC105224532(PLA2);LOC105232034(--)	K01047+K01047
Metabolism	Amino acid metabolism	Arginine biosynthesis	3	15	0.0292712	0.219942	ko00220	LOC105222926(Gdh);LOC105229149(Nos);LOC105229765(Acy1b)	K00261+K13240+K14677
Metabolism	Glycan biosynthesis and metabolism	Glycosaminoglycan degradation	3	15	0.0292712	0.219942	ko00531	LOC105223217(GLB1);LOC105224017(Arsb);LOC105229216(HEXB)	K12309+K01135+K12373
Metabolism	Lipid metabolism	Sphingolipid metabolism	4	26	0.0296713	0.219942	ko00600	LOC105223217(GLB1);LOC105223744(bwa);LOC105227848(PLPP1);LOC105227849(Plpp2)	K12309+K01441+K01080+K01080
Organismal Systems	Immune system	Toll and Imd signaling pathway	8	80	0.0298226	0.219942	ko04624	LOC105224657(Spn42Dd);LOC105228508(modSP);LOC105229884(snk);LOC105231664(PGRP-LB);LOC105231777(CEC1);LOC105231778(CEC2);LOC105231780(CEC2);LOC115066711(--)	K20698+K20674+K20675+K01446+K20696+K20696+K20696+K20694
Metabolism	Global and overview maps	2-Oxocarboxylic acid metabolism	3	16	0.0348332	0.24911	ko01210	LOC105222215(v1g246094);LOC105224810(Idh1);LOC105229765(Acy1b)	K00826+K00031+K14677
Metabolism	Glycan biosynthesis and metabolism	Glycosphingolipid biosynthesis - ganglio series	2	7	0.0382635	0.265594	ko00604	LOC105223217(GLB1);LOC105229216(HEXB)	K12309+K12373
Metabolism	Amino acid metabolism	Valine, leucine and isoleucine biosynthesis	1	1	0.0462339	0.311749	ko00290	LOC105222215(v1g246094)	K00826
Metabolism	Metabolism of cofactors and vitamins	Porphyrin and chlorophyll metabolism	5	44	0.0502427	0.329369	ko00860	LOC105229550(UGT2A1);LOC105230262(UGT8);LOC105231227(UGT2B20);LOC115065792(UGT2B13);LOC115066658(--)	K00699+K00699+K00699+K00699+K00699
Metabolism	Metabolism of terpenoids and polyketides	Terpenoid backbone biosynthesis	4	32	0.0577259	0.358508	ko00900	LOC105223822(SDR-1);LOC105223823(--);LOC105223827(SDR-1);LOC105227882(SDR-1)	K15890+K15890+K15890+K15890
Organismal Systems	Endocrine system	Renin secretion	4	32	0.0577259	0.358508	ko04924	LOC105222909(Gnaq);LOC105229185(--);LOC105230478(Npr1);LOC105232277(Ance)	K04634+K01283+K12323+K01283
Human Diseases	Substance dependence	Cocaine addiction	3	20	0.0620268	0.366245	ko05030	LOC105227310(DAT);LOC105228430(Slc18a2);LOC105233100(Grin2b)	K05036+K08155+K05210
Metabolism	Amino acid metabolism	Cysteine and methionine metabolism	4	33	0.0634199	0.366245	ko00270	LOC105222215(v1g246094);LOC105223108(HMT-1);LOC105227212(AGXT2);LOC105230711(Tat)	K00826+K00547+K00827+K00815
Organismal Systems	Digestive system	Bile secretion	5	47	0.0636272	0.366245	ko04976	LOC105229550(UGT2A1);LOC105230262(UGT8);LOC105231227(UGT2B20);LOC115065792(UGT2B13);LOC115066658(--)	K00699+K00699+K00699+K00699+K00699
Metabolism	Carbohydrate metabolism	Amino sugar and nucleotide sugar metabolism	5	48	0.0684949	0.384876	ko00520	LOC105222986(CHIA);LOC105226562(chs-2);LOC105229216(HEXB);LOC109579331(--);LOC115065892(--)	K01183+K00698+K12373+K01183+K01183
Human Diseases	Cancers	Hepatocellular carcinoma	8	95	0.0702536	0.385578	ko05225	LOC105222207(Myc);LOC105225817(GstD1);LOC105227725(GST1);LOC105228298(GSTT1);LOC105229681(GST1);LOC105229690(GstD1);LOC105230971(InR);LOC105232205(--)	K04377+K00799+K00799+K00799+K00799+K00799+K05087+K10456
Metabolism	Metabolism of cofactors and vitamins	Ubiquinone and other terpenoid-quinone biosynthesis	2	10	0.0748921	0.401694	ko00130	LOC105224730(Hpd);LOC105230711(Tat)	K00457+K00815
Metabolism	Metabolism of other amino acids	D-Glutamine and D-glutamate metabolism	1	2	0.0903438	0.473803	ko00471	LOC105222926(Gdh)	K00261
Metabolism	Lipid metabolism	Glycerophospholipid metabolism	5	55	0.108102	0.554608	ko00564	LOC105224532(PLA2);LOC105227848(PLPP1);LOC105227849(Plpp2);LOC105229768(ACHE1);LOC105232034(--)	K01047+K01080+K01080+K01049+K01047
Metabolism	Lipid metabolism	alpha-Linolenic acid metabolism	2	13	0.1187	0.595482	ko00592	LOC105224532(PLA2);LOC105232034(--)	K01047+K01047
Metabolism	Global and overview maps	Biosynthesis of amino acids	5	57	0.121115	0.595482	ko01230	LOC105222215(v1g246094);LOC105224810(Idh1);LOC105225803(gpmA);LOC105229765(Acy1b);LOC105230711(Tat)	K00826+K00031+K01834+K14677+K00815
Metabolism	Amino acid metabolism	Glycine, serine and threonine metabolism	3	27	0.126333	0.608462	ko00260	LOC105225803(gpmA);LOC105227212(AGXT2);LOC105228945(Sardh)	K01834+K00827+K00314
Metabolism	Lipid metabolism	Arachidonic acid metabolism	2	14	0.134447	0.634589	ko00590	LOC105224532(PLA2);LOC105232034(--)	K01047+K01047
Metabolism	Energy metabolism	Nitrogen metabolism	2	16	0.16717	0.727279	ko00910	LOC105222247(cahz);LOC105222926(Gdh)	K01672+K00261
Environmental Information Processing	Signaling molecules and interaction	ECM-receptor interaction	2	16	0.16717	0.727279	ko04512	LOC105222583(thbs3a);LOC115066528(TNR)	K04659+K06252
Human Diseases	Immune diseases	Rheumatoid arthritis	3	31	0.170482	0.727279	ko05323	LOC105226824(Cp1);LOC105227818(ATP6V0A1);LOC105232835(Ctla2a)	K01365+K02154+K01365
Metabolism	Amino acid metabolism	Phenylalanine, tyrosine and tryptophan biosynthesis	1	4	0.172575	0.727279	ko00400	LOC105230711(Tat)	K00815
Metabolism	Glycan biosynthesis and metabolism	Mannose type O-glycan biosyntheis	1	4	0.172575	0.727279	ko00515	LOC105227401(rt)	K00728
Metabolism	Metabolism of cofactors and vitamins	Biotin metabolism	1	4	0.172575	0.727279	ko00780	LOC105232645(vanin-like)	K01435
Organismal Systems	Digestive system	Pancreatic secretion	6	82	0.176472	0.730654	ko04972	LOC105222909(Gnaq);LOC105224532(PLA2);LOC105225174(Prss1);LOC105225976(Slc12a2);LOC105228391(TRYP4);LOC105232034(--)	K04634+K01047+K01312+K10951+K01312+K01047
Environmental Information Processing	Signal transduction	Hippo signaling pathway - multiple species	2	17	0.184006	0.736023	ko04392	LOC105223592(ds);LOC105227822(ft)	K16507+K16669
Organismal Systems	Digestive system	Vitamin digestion and absorption	2	17	0.184006	0.736023	ko04977	LOC105221974(slc46a1);LOC105232645(vanin-like)	K14613+K01435
Metabolism	Amino acid metabolism	Valine, leucine and isoleucine degradation	3	33	0.194019	0.763142	ko00280	LOC105222215(v1g246094);LOC105224512(Aldh1b1);LOC105227212(AGXT2)	K00826+K00128+K00827
Organismal Systems	Immune system	Antigen processing and presentation	2	18	0.201073	0.768995	ko04612	LOC105226824(Cp1);LOC105232835(Ctla2a)	K01365+K01365
Metabolism	Metabolism of cofactors and vitamins	Folate biosynthesis	3	34	0.206079	0.768995	ko00790	LOC105222791(--);LOC105226111(Alp-m);LOC105227008(Alp4)	K00072+K01077+K01077
Human Diseases	Cancers	Central carbon metabolism in cancer	3	34	0.206079	0.768995	ko05230	LOC105222207(Myc);LOC105224810(Idh1);LOC105225803(gpmA)	K04377+K00031+K01834
Genetic Information Processing	Replication and repair	DNA replication	3	35	0.218306	0.768995	ko03030	LOC105223304(Mcm6);LOC105226613(Mcm2);LOC105229089(Mcm7)	K02542+K02540+K02210
Metabolism	Amino acid metabolism	Tryptophan metabolism	2	19	0.218316	0.768995	ko00380	LOC105224512(Aldh1b1);LOC105225353(AANAT1)	K00128+K00669
Metabolism	Metabolism of cofactors and vitamins	Thiamine metabolism	2	19	0.218316	0.768995	ko00730	LOC105226111(Alp-m);LOC105227008(Alp4)	K01077+K01077
Environmental Information Processing	Signal transduction	Jak-STAT signaling pathway	2	19	0.218316	0.768995	ko04630	LOC105222207(Myc);LOC105231214(SOCS5)	K04377+K04698
Metabolism	Glycan biosynthesis and metabolism	Other glycan degradation	2	20	0.235682	0.799869	ko00511	LOC105223217(GLB1);LOC105229216(HEXB)	K12309+K12373
Metabolism	Glycan biosynthesis and metabolism	Mucin type O-glycan biosynthesis	2	20	0.235682	0.799869	ko00512	LOC105225673(C1GalTA);LOC105225674(C1GalTA)	K00731+K00731
Organismal Systems	Nervous system	Long-term depression	3	37	0.243182	0.799869	ko04730	LOC105222909(Gnaq);LOC105229149(Nos);LOC105230971(InR)	K04634+K13240+K05087
Cellular Processes	Transport and catabolism	Phagosome	5	73	0.246947	0.799869	ko04145	LOC105222583(thbs3a);LOC105226824(Cp1);LOC105227818(ATP6V0A1);LOC105229149(Nos);LOC105232835(Ctla2a)	K04659+K01365+K02154+K13240+K01365
Metabolism	Glycan biosynthesis and metabolism	Glycosphingolipid biosynthesis - globo and isoglobo series	1	6	0.247417	0.799869	ko00603	LOC105229216(HEXB)	K12373
Human Diseases	Infectious diseases	Malaria	1	6	0.247417	0.799869	ko05144	LOC105222583(thbs3a)	K04659
Human Diseases	Substance dependence	Amphetamine addiction	3	38	0.255792	0.813604	ko05031	LOC105227310(DAT);LOC105228430(Slc18a2);LOC105233100(Grin2b)	K05036+K08155+K05210
Environmental Information Processing	Signal transduction	Hippo signaling pathway -fly	4	56	0.258561	0.813604	ko04391	LOC105222207(Myc);LOC105223592(ds);LOC105223641(--);LOC105227822(ft)	K04377+K16507+K16689+K16669
Metabolism	Amino acid metabolism	Histidine metabolism	1	7	0.282276	0.865157	ko00340	LOC105224512(Aldh1b1)	K00128
Metabolism	Glycan biosynthesis and metabolism	Glycosaminoglycan biosynthesis - chondroitin sulfate / dermatan sulfate	1	7	0.282276	0.865157	ko00532	LOC105222062(CHST11)	K01017
Organismal Systems	Circulatory system	Vascular smooth muscle contraction	4	59	0.289895	0.872263	ko04270	LOC105222909(Gnaq);LOC105224532(PLA2);LOC105230478(Npr1);LOC105232034(--)	K04634+K01047+K12323+K01047
Metabolism	Amino acid metabolism	Lysine degradation	3	41	0.294094	0.872263	ko00310	LOC105223355(BBOX1);LOC105224512(Aldh1b1);LOC105224723(GA16561)	K00471+K00128+K11703
Human Diseases	Cancers	Endometrial cancer	2	24	0.305474	0.872263	ko05213	LOC105222207(Myc);LOC105225577(Pdk1)	K04377+K06276
Human Diseases	Infectious diseases	Chagas disease (American trypanosomiasis)	3	42	0.306962	0.872263	ko05142	LOC105222909(Gnaq);LOC105229185(--);LOC105232277(Ance)	K04634+K01283+K01283
Organismal Systems	Nervous system	Dopaminergic synapse	4	61	0.311078	0.872263	ko04728	LOC105222909(Gnaq);LOC105227310(DAT);LOC105228430(Slc18a2);LOC105233100(Grin2b)	K04634+K05036+K08155+K05210
Human Diseases	Immune diseases	Systemic lupus erythematosus	1	8	0.31553	0.872263	ko05322	LOC105233100(Grin2b)	K05210
Metabolism	Lipid metabolism	Glycerolipid metabolism	3	43	0.319852	0.872263	ko00561	LOC105224512(Aldh1b1);LOC105227848(PLPP1);LOC105227849(Plpp2)	K00128+K01080+K01080
Organismal Systems	Digestive system	Mineral absorption	2	25	0.322814	0.872263	ko04978	LOC105221974(slc46a1);LOC105231062(--)	K14613+K14686
Organismal Systems	Environmental adaptation	Circadian entrainment	3	45	0.345643	0.872263	ko04713	LOC105222909(Gnaq);LOC105229149(Nos);LOC105233100(Grin2b)	K04634+K13240+K05210
Organismal Systems	Nervous system	Serotonergic synapse	3	45	0.345643	0.872263	ko04726	LOC105222909(Gnaq);LOC105223854(SerT);LOC105228430(Slc18a2)	K04634+K05037+K08155
Metabolism	Metabolism of other amino acids	Taurine and hypotaurine metabolism	1	9	0.347254	0.872263	ko00430	LOC105229437(Csad)	K01594
Environmental Information Processing	Signaling molecules and interaction	Cytokine-cytokine receptor interaction	1	9	0.347254	0.872263	ko04060	LOC105225122(dpp)	K04662
Organismal Systems	Immune system	Hematopoietic cell lineage	1	9	0.347254	0.872263	ko04640	LOC105230937(Anpep)	K11140
Human Diseases	Substance dependence	Nicotine addiction	1	9	0.347254	0.872263	ko05033	LOC105233100(Grin2b)	K05210
Human Diseases	Cancers	Bladder cancer	1	9	0.347254	0.872263	ko05219	LOC105222207(Myc)	K04377
Human Diseases	Cancers	Pathways in cancer	10	185	0.35056	0.872263	ko05200	LOC105222207(Myc);LOC105222909(Gnaq);LOC105225122(dpp);LOC105225817(GstD1);LOC105227725(GST1);LOC105228298(GSTT1);LOC105229681(GST1);LOC105229690(GstD1);LOC105230971(InR);LOC105232205(--)	K04377+K04634+K04662+K00799+K00799+K00799+K00799+K00799+K05087+K10456
Metabolism	Nucleotide metabolism	Purine metabolism	7	125	0.35653	0.872263	ko00230	LOC105227488(SPCC285.04);LOC105230478(Npr1);LOC105230669(RnrS);LOC105230951(XDH);LOC105231184(Uro);LOC105232646(ADA2);LOC105232649(ada2)	K07127+K12323+K10808+K00106+K00365+K19572+K19572
Organismal Systems	Aging	Longevity regulating pathway - multiple species	3	46	0.358515	0.872263	ko04213	LOC105228868(Ilp7);LOC105229288(EIF4EBP1);LOC105230971(InR)	K19805+K18644+K05087
Cellular Processes	Cellular community - eukaryotes	Signaling pathways regulating pluripotency of stem cells	3	46	0.358515	0.872263	ko04550	LOC105222207(Myc);LOC105225122(dpp);LOC105230971(InR)	K04377+K04662+K05087
Human Diseases	Substance dependence	Alcoholism	3	46	0.358515	0.872263	ko05034	LOC105227310(DAT);LOC105228430(Slc18a2);LOC105233100(Grin2b)	K05036+K08155+K05210
Human Diseases	Neurodegenerative diseases	Amyotrophic lateral sclerosis (ALS)	2	28	0.374081	0.899938	ko05014	LOC105229149(Nos);LOC105233100(Grin2b)	K13240+K05210
Metabolism	Metabolism of cofactors and vitamins	One carbon pool by folate	1	10	0.377516	0.899938	ko00670	LOC105223295(aldh1l1)	K00289
Environmental Information Processing	Signaling molecules and interaction	Neuroactive ligand-receptor interaction	4	68	0.385932	0.910799	ko04080	LOC105225174(Prss1);LOC105228391(TRYP4);LOC105233100(Grin2b);LOC105233744(PK1-R)	K01312+K01312+K05210+K05052
Human Diseases	Endocrine and metabolic diseases	Insulin resistance	3	49	0.396881	0.927365	ko04931	LOC105222009(GlyP);LOC105225577(Pdk1);LOC105231309(SLC27A4)	K00688+K06276+K08745
Cellular Processes	Transport and catabolism	Autophagy - animal	5	90	0.403621	0.929356	ko04140	LOC105225577(Pdk1);LOC105225893(atg101);LOC105226824(Cp1);LOC105230971(InR);LOC105232835(Ctla2a)	K06276+K19730+K01365+K05087+K01365
Human Diseases	Cardiovascular diseases	Hypertrophic cardiomyopathy (HCM)	2	30	0.407394	0.929356	ko05410	LOC105229185(--);LOC105232277(Ance)	K01283+K01283
Organismal Systems	Immune system	Fc gamma R-mediated phagocytosis	3	50	0.409546	0.929356	ko04666	LOC105227848(PLPP1);LOC105227849(Plpp2);LOC105230363(Gel)	K01080+K01080+K05768
Environmental Information Processing	Signal transduction	TGF-beta signaling pathway	2	31	0.423733	0.952391	ko04350	LOC105222207(Myc);LOC105225122(dpp)	K04377+K04662
Human Diseases	Cancers	Thyroid cancer	1	12	0.433922	0.966091	ko05216	LOC105222207(Myc)	K04377
Environmental Information Processing	Signal transduction	PI3K-Akt signaling pathway	5	95	0.450093	0.969688	ko04151	LOC105222207(Myc);LOC105222583(thbs3a);LOC105225577(Pdk1);LOC105230971(InR);LOC115066528(TNR)	K04377+K04659+K06276+K05087+K06252
Organismal Systems	Endocrine system	Glucagon signaling pathway	3	54	0.45932	0.969688	ko04922	LOC105222009(GlyP);LOC105222909(Gnaq);LOC105225803(gpmA)	K00688+K04634+K01834
Cellular Processes	Cellular community - eukaryotes	Focal adhesion	4	75	0.459823	0.969688	ko04510	LOC105222583(thbs3a);LOC105225577(Pdk1);LOC105230971(InR);LOC115066528(TNR)	K04659+K06276+K05087+K06252
Metabolism	Metabolism of cofactors and vitamins	Pantothenate and CoA biosynthesis	1	13	0.460191	0.969688	ko00770	LOC105222215(v1g246094)	K00826
Organismal Systems	Excretory system	Proximal tubule bicarbonate reclamation	1	13	0.460191	0.969688	ko04964	LOC105222926(Gdh)	K00261
Human Diseases	Cancers	Melanoma	1	13	0.460191	0.969688	ko05218	LOC105230971(InR)	K05087
Cellular Processes	Cell growth and death	Cell cycle	4	76	0.470164	0.981551	ko04110	LOC105222207(Myc);LOC105223304(Mcm6);LOC105226613(Mcm2);LOC105229089(Mcm7)	K04377+K02542+K02540+K02210
Environmental Information Processing	Signal transduction	Ras signaling pathway	4	77	0.480433	0.981551	ko04014	LOC105224532(PLA2);LOC105230971(InR);LOC105232034(--);LOC105233100(Grin2b)	K01047+K05087+K01047+K05210
Human Diseases	Cancers	Choline metabolism in cancer	3	56	0.483548	0.981551	ko05231	LOC105225577(Pdk1);LOC105227848(PLPP1);LOC105227849(Plpp2)	K06276+K01080+K01080
Organismal Systems	Endocrine system	Ovarian Steroidogenesis	1	14	0.485248	0.981551	ko04913	LOC105230971(InR)	K05087
Human Diseases	Cancers	Proteoglycans in cancer	5	99	0.486616	0.981551	ko05205	LOC105222207(Myc);LOC105225577(Pdk1);LOC105226824(Cp1);LOC105230971(InR);LOC105232835(Ctla2a)	K04377+K06276+K01365+K05087+K01365
Organismal Systems	Endocrine system	PPAR signaling pathway	2	36	0.501688	0.999371	ko03320	LOC105225577(Pdk1);LOC105231309(SLC27A4)	K06276+K08745
Cellular Processes	Cell growth and death	Apoptosis	3	58	0.507258	0.999371	ko04210	LOC105225577(Pdk1);LOC105226824(Cp1);LOC105232835(Ctla2a)	K06276+K01365+K01365
Organismal Systems	Digestive system	Salivary secretion	3	59	0.518903	0.999371	ko04970	LOC105222909(Gnaq);LOC105225976(Slc12a2);LOC105229149(Nos)	K04634+K10951+K13240
Metabolism	Lipid metabolism	Fatty acid elongation	1	16	0.531948	0.999371	ko00062	LOC105226450(eloF)	K10249
Environmental Information Processing	Signal transduction	FoxO signaling pathway	3	62	0.552931	0.999371	ko04068	LOC105225577(Pdk1);LOC105229463(SAK);LOC105230971(InR)	K06276+K08863+K05087
Organismal Systems	Digestive system	Protein digestion and absorption	3	62	0.552931	0.999371	ko04974	LOC105225174(Prss1);LOC105228391(TRYP4);LOC105229065(CG1139)	K01312+K01312+K14209
Metabolism	Metabolism of other amino acids	beta-Alanine metabolism	1	17	0.553695	0.999371	ko00410	LOC105224512(Aldh1b1)	K00128
Human Diseases	Cancers	Breast cancer	2	40	0.559016	0.999371	ko05224	LOC105222207(Myc);LOC105230971(InR)	K04377+K05087
Human Diseases	Infectious diseases	African trypanosomiasis	1	18	0.574437	0.999371	ko05143	LOC105222909(Gnaq)	K04634
Environmental Information Processing	Signal transduction	MAPK signaling pathway - fly	4	87	0.578219	0.999371	ko04013	LOC105225122(dpp);LOC105232240(bi);LOC105232323(spi);LOC105233319(lz)	K04662+K10176+K20229+K20214
Environmental Information Processing	Signal transduction	Sphingolipid signaling pathway	3	65	0.585512	0.999371	ko04071	LOC105222909(Gnaq);LOC105223744(bwa);LOC105225577(Pdk1)	K04634+K01441+K06276
Cellular Processes	Cell growth and death	Necroptosis	2	42	0.585884	0.999371	ko04217	LOC105222009(GlyP);LOC105222926(Gdh)	K00688+K00261
Human Diseases	Cancers	Acute myeloid leukemia	1	19	0.594221	0.999371	ko05221	LOC105222207(Myc)	K04377
Organismal Systems	Aging	Longevity regulating pathway - mammal	2	43	0.598861	0.999371	ko04211	LOC105225893(atg101);LOC105230971(InR)	K19730+K05087
Organismal Systems	Nervous system	Long-term potentiation	2	43	0.598861	0.999371	ko04720	LOC105222909(Gnaq);LOC105233100(Grin2b)	K04634+K05210
Organismal Systems	Nervous system	Glutamatergic synapse	2	43	0.598861	0.999371	ko04724	LOC105222909(Gnaq);LOC105233100(Grin2b)	K04634+K05210
Organismal Systems	Endocrine system	Aldosterone synthesis and secretion	2	44	0.611533	0.999371	ko04925	LOC105222909(Gnaq);LOC105230478(Npr1)	K04634+K12323
Human Diseases	Drug resistance	Antifolate resistance	1	20	0.613092	0.999371	ko01523	LOC105221974(slc46a1)	K14613
Organismal Systems	Endocrine system	Cortisol synthesis and secretion	1	20	0.613092	0.999371	ko04927	LOC105222909(Gnaq)	K04634
Organismal Systems	Endocrine system	Thyroid hormone signaling pathway	3	68	0.61656	0.999371	ko04919	LOC105222207(Myc);LOC105225122(dpp);LOC105225577(Pdk1)	K04377+K04662+K06276
Environmental Information Processing	Signal transduction	Notch signaling pathway	1	21	0.63109	0.999371	ko04330	LOC105221842(fng)	K05948
Human Diseases	Cancers	Basal cell carcinoma	1	21	0.63109	0.999371	ko05217	LOC105225122(dpp)	K04662
Environmental Information Processing	Signal transduction	Rap1 signaling pathway	3	70	0.636377	0.999371	ko04015	LOC105222909(Gnaq);LOC105230971(InR);LOC105233100(Grin2b)	K04634+K05087+K05210
Organismal Systems	Nervous system	Cholinergic synapse	2	47	0.647723	0.999371	ko04725	LOC105222909(Gnaq);LOC105229768(ACHE1)	K04634+K01049
Cellular Processes	Cell growth and death	p53 signaling pathway	1	22	0.648257	0.999371	ko04115	LOC105230669(RnrS)	K10808
Organismal Systems	Immune system	Cytosolic DNA-sensing pathway	1	22	0.648257	0.999371	ko04623	LOC105223718(Trex1)	K10790
Organismal Systems	Endocrine system	Regulation of lipolysis in adipocyte	1	22	0.648257	0.999371	ko04923	LOC105230478(Npr1)	K12323
Cellular Processes	Transport and catabolism	Autophagy - other eukaryotes	1	23	0.66463	0.999371	ko04136	LOC105225893(atg101)	K19730
Organismal Systems	Excretory system	Collecting duct acid secretion	1	23	0.66463	0.999371	ko04966	LOC105227818(ATP6V0A1)	K02154
Metabolism	Global and overview maps	Carbon metabolism	4	97	0.664834	0.999371	ko01200	LOC105222327(GLO5);LOC105222926(Gdh);LOC105224810(Idh1);LOC105225803(gpmA)	K11517+K00261+K00031+K01834
Environmental Information Processing	Signal transduction	Apelin signaling pathway	2	49	0.670344	0.999371	ko04371	LOC105222909(Gnaq);LOC105229149(Nos)	K04634+K13240
Organismal Systems	Nervous system	Synaptic vesicle cycle	2	49	0.670344	0.999371	ko04721	LOC105227818(ATP6V0A1);LOC105228430(Slc18a2)	K02154+K08155
Metabolism	Carbohydrate metabolism	Glycolysis / Gluconeogenesis	2	51	0.691786	0.999371	ko00010	LOC105224512(Aldh1b1);LOC105225803(gpmA)	K00128+K01834
Human Diseases	Cancers	Transcriptional misregulation in cancers	2	51	0.691786	0.999371	ko05202	LOC105222207(Myc);LOC105230971(InR)	K04377+K05087
Environmental Information Processing	Signal transduction	Hedgehog signaling pathway - fly	1	25	0.695138	0.999371	ko04341	LOC105225122(dpp)	K04662
Organismal Systems	Excretory system	Aldosterone-regulated sodium reabsorption	1	25	0.695138	0.999371	ko04960	LOC105225577(Pdk1)	K06276
Human Diseases	Infectious diseases	Hepatitis C	1	26	0.709342	0.999371	ko05160	LOC105225577(Pdk1)	K06276
Human Diseases	Infectious diseases	Vibrio cholerae infection	2	54	0.721795	0.999371	ko05110	LOC105225976(Slc12a2);LOC105227818(ATP6V0A1)	K10951+K02154
Genetic Information Processing	Replication and repair	Fanconi anemia pathway	1	27	0.722888	0.999371	ko03460	LOC105227371(POLH)	K03509
Human Diseases	Cancers	Chronic myeloid leukemia	1	27	0.722888	0.999371	ko05220	LOC105222207(Myc)	K04377
Human Diseases	Cancers	Small cell lung cancer	1	28	0.735807	0.999371	ko05222	LOC105222207(Myc)	K04377
Organismal Systems	Immune system	Fc epsilon RI signaling pathway	1	29	0.748127	0.999371	ko04664	LOC105225577(Pdk1)	K06276
Organismal Systems	Endocrine system	Prolactin signaling pathway	1	29	0.748127	0.999371	ko04917	LOC105231214(SOCS5)	K04698
Environmental Information Processing	Signal transduction	AMPK signaling pathway	2	57	0.749321	0.999371	ko04152	LOC105225577(Pdk1);LOC105230971(InR)	K06276+K05087
Human Diseases	Cancers	Non-small cell lung cancer	1	30	0.759876	0.999371	ko05223	LOC105225577(Pdk1)	K06276
Human Diseases	Cancers	Glioma	1	31	0.771081	0.999371	ko05214	LOC105230971(InR)	K05087
Environmental Information Processing	Signal transduction	cGMP - PKG signaling pathway	2	60	0.77449	0.999371	ko04022	LOC105222909(Gnaq);LOC105230478(Npr1)	K04634+K12323
Organismal Systems	Immune system	T cell receptor signaling pathway	1	32	0.781767	0.999371	ko04660	LOC105225577(Pdk1)	K06276
Metabolism	Carbohydrate metabolism	Galactose metabolism	1	33	0.791956	0.999371	ko00052	LOC105223217(GLB1)	K12309
Metabolism	Carbohydrate metabolism	Glyoxylate and dicarboxylate metabolism	1	33	0.791956	0.999371	ko00630	LOC105222327(GLO5)	K11517
Organismal Systems	Endocrine system	Insulin signaling pathway	2	63	0.797441	0.999371	ko04910	LOC105222009(GlyP);LOC105225577(Pdk1)	K00688+K06276
Metabolism	Carbohydrate metabolism	Starch and sucrose metabolism	1	34	0.801673	0.999371	ko00500	LOC105222009(GlyP)	K00688
Human Diseases	Drug resistance	EGFR tyrosine kinase inhibitor resistance	1	34	0.801673	0.999371	ko01521	LOC105230971(InR)	K05087
Environmental Information Processing	Signal transduction	Calcium signaling pathway	2	64	0.804622	0.999371	ko04020	LOC105222909(Gnaq);LOC105229149(Nos)	K04634+K13240
Environmental Information Processing	Signal transduction	Phospholipase D signaling pathway	2	64	0.804622	0.999371	ko04072	LOC105227848(PLPP1);LOC105227849(Plpp2)	K01080+K01080
Human Diseases	Drug resistance	Endocrine resistance	1	35	0.810939	0.999371	ko01522	LOC105230971(InR)	K05087
Human Diseases	Infectious diseases	Toxoplasmosis	1	35	0.810939	0.999371	ko05145	LOC105225577(Pdk1)	K06276
Human Diseases	Cancers	Colorectal cancer	1	35	0.810939	0.999371	ko05210	LOC105222207(Myc)	K04377
Human Diseases	Cancers	MicroRNAs in cancer	2	65	0.811578	0.999371	ko05206	LOC105222207(Myc);LOC115066528(TNR)	K04377+K06252
Genetic Information Processing	Translation	Ribosome biogenesis in eukaryotes	2	66	0.818314	0.999371	ko03008	LOC105224702(Nop60B);LOC105224742(RIOK1)	K11131+K07178
Organismal Systems	Endocrine system	Oxytocin signaling pathway	2	66	0.818314	0.999371	ko04921	LOC105222909(Gnaq);LOC105230478(Npr1)	K04634+K12323
Metabolism	Lipid metabolism	Fatty acid degradation	1	36	0.819775	0.999371	ko00071	LOC105224512(Aldh1b1)	K00128
Organismal Systems	Excretory system	Endocrine and other factor-regulated calcium reabsorption	1	36	0.819775	0.999371	ko04961	LOC105222909(Gnaq)	K04634
Organismal Systems	Sensory system	Phototransduction - fly	1	37	0.8282	0.999371	ko04745	LOC105222909(Gnaq)	K04634
Human Diseases	Infectious diseases	Amoebiasis	1	37	0.8282	0.999371	ko05146	LOC105222909(Gnaq)	K04634
Metabolism	Carbohydrate metabolism	Citrate cycle (TCA cycle)	1	38	0.836234	0.999371	ko00020	LOC105224810(Idh1)	K00031
Organismal Systems	Endocrine system	Thyroid hormone synthesis	1	38	0.836234	0.999371	ko04918	LOC105222909(Gnaq)	K04634
Environmental Information Processing	Signal transduction	Hippo signaling pathway	2	69	0.837253	0.999371	ko04390	LOC105222207(Myc);LOC105225122(dpp)	K04377+K04662
Metabolism	Carbohydrate metabolism	Pyruvate metabolism	1	39	0.843895	0.999371	ko00620	LOC105224512(Aldh1b1)	K00128
Genetic Information Processing	Translation	Aminoacyl-tRNA biosynthesis	1	40	0.851199	0.999371	ko00970	LOC105222249(NARS)	K01893
Environmental Information Processing	Signal transduction	ErbB signaling pathway	1	40	0.851199	0.999371	ko04012	LOC105222207(Myc)	K04377
Metabolism	Carbohydrate metabolism	Inositol phosphate metabolism	1	41	0.858164	0.999371	ko00562	LOC105226135(miox)	K00469
Cellular Processes	Cellular community - eukaryotes	Adherens junction	1	41	0.858164	0.999371	ko04520	LOC105230971(InR)	K05087
Organismal Systems	Digestive system	Gastric acid secretion	1	41	0.858164	0.999371	ko04971	LOC105222909(Gnaq)	K04634
Human Diseases	Cancers	Gastric cancer	1	42	0.864805	0.999371	ko05226	LOC105222207(Myc)	K04377
Human Diseases	Infectious diseases	Human cytomegalovirus infection	2	74	0.864907	0.999371	ko05163	LOC105222207(Myc);LOC105222909(Gnaq)	K04377+K04634
Human Diseases	Infectious diseases	Human papillomavirus infection	4	132	0.869184	0.999371	ko05165	LOC105221842(fng);LOC105222583(thbs3a);LOC105227818(ATP6V0A1);LOC115066528(TNR)	K05948+K04659+K02154+K06252
Environmental Information Processing	Signal transduction	cAMP signaling pathway	2	75	0.869897	0.999371	ko04024	LOC105230478(Npr1);LOC105233100(Grin2b)	K12323+K05210
Organismal Systems	Endocrine system	Parathyroid hormone synthesis, secretion and action	1	43	0.871137	0.999371	ko04928	LOC105222909(Gnaq)	K04634
Organismal Systems	Immune system	Platelet activation	1	45	0.882931	0.999371	ko04611	LOC105222909(Gnaq)	K04634
Organismal Systems	Sensory system	Inflammatory mediator regulation of TRP channels	1	45	0.882931	0.999371	ko04750	LOC105222909(Gnaq)	K04634
Organismal Systems	Nervous system	Neurotrophin signaling pathway	1	46	0.888419	0.999371	ko04722	LOC105225577(Pdk1)	K06276
Organismal Systems	Endocrine system	GnRH signaling pathway	1	48	0.89864	0.999371	ko04912	LOC105222909(Gnaq)	K04634
Organismal Systems	Endocrine system	Melanogenesis	1	48	0.89864	0.999371	ko04916	LOC105222909(Gnaq)	K04634
Cellular Processes	Cell growth and death	Apoptosis - fly	1	49	0.903396	0.999371	ko04214	LOC105225270(Eip74EF)	K09428
Human Diseases	Infectious diseases	Epithelial cell signaling in Helicobacter pylori infection	1	49	0.903396	0.999371	ko05120	LOC105227818(ATP6V0A1)	K02154
Cellular Processes	Cellular community - eukaryotes	Gap junction	1	50	0.907931	0.999371	ko04540	LOC105222909(Gnaq)	K04634
Human Diseases	Infectious diseases	Kaposi sarcoma-associated herpesvirus infection	1	50	0.907931	0.999371	ko05167	LOC105222207(Myc)	K04377
Organismal Systems	Endocrine system	Progesterone-mediated oocyte maturation	1	52	0.916375	0.999371	ko04914	LOC105230971(InR)	K05087
Human Diseases	Infectious diseases	Hepatitis B	1	52	0.916375	0.999371	ko05161	LOC105222207(Myc)	K04377
Organismal Systems	Endocrine system	Insulin secretion	1	53	0.920304	0.999371	ko04911	LOC105222909(Gnaq)	K04634
Organismal Systems	Endocrine system	Estrogen signaling pathway	1	54	0.924049	0.999371	ko04915	LOC105222909(Gnaq)	K04634
Organismal Systems	Endocrine system	Relaxin signaling pathway	1	54	0.924049	0.999371	ko04926	LOC105229149(Nos)	K13240
Human Diseases	Infectious diseases	Influenza A	2	91	0.929853	0.999371	ko05164	LOC105225174(Prss1);LOC105228391(TRYP4)	K01312+K01312
Human Diseases	Neurodegenerative diseases	Alzheimer disease	3	125	0.935567	0.999371	ko05010	LOC105222909(Gnaq);LOC105229149(Nos);LOC105233100(Grin2b)	K04634+K13240+K05210
Environmental Information Processing	Signal transduction	MAPK signaling pathway	2	94	0.937708	0.999371	ko04010	LOC105222207(Myc);LOC105230971(InR)	K04377+K05087
Organismal Systems	Circulatory system	Adrenergic signaling in cardiomyocytes	1	59	0.94031	0.999371	ko04261	LOC105222909(Gnaq)	K04634
Environmental Information Processing	Signal transduction	mTOR signaling pathway	2	96	0.942475	0.999371	ko04150	LOC105225577(Pdk1);LOC105230971(InR)	K06276+K05087
Environmental Information Processing	Signal transduction	HIF-1 signaling pathway	1	60	0.94312	0.999371	ko04066	LOC105230971(InR)	K05087
Organismal Systems	Development	Axon guidance	1	61	0.945799	0.999371	ko04360	LOC105228810(NetA)	K06843
Human Diseases	Endocrine and metabolic diseases	Cushing syndrome	1	61	0.945799	0.999371	ko04934	LOC105222909(Gnaq)	K04634
Human Diseases	Infectious diseases	Tuberculosis	1	61	0.945799	0.999371	ko05152	LOC105227818(ATP6V0A1)	K02154
Cellular Processes	Cell motility	Regulation of actin cytoskeleton	1	64	0.953107	0.999371	ko04810	LOC105230363(Gel)	K05768
Human Diseases	Neurodegenerative diseases	Parkinson disease	2	102	0.954794	0.999371	ko05012	LOC105227310(DAT);LOC105228430(Slc18a2)	K05036+K08155
Cellular Processes	Cell growth and death	Cellular senescence	1	66	0.957426	0.999371	ko04218	LOC105222207(Myc)	K04377
Cellular Processes	Cell growth and death	Oocyte meiosis	1	69	0.963175	0.999371	ko04114	LOC105230971(InR)	K05087
Environmental Information Processing	Signal transduction	Wnt signaling pathway	1	75	0.97246	0.999371	ko04310	LOC105222207(Myc)	K04377
Organismal Systems	Nervous system	Retrograde endocannabinoid signaling	1	76	0.973763	0.999371	ko04723	LOC105222909(Gnaq)	K04634
Metabolism	Nucleotide metabolism	Pyrimidine metabolism	1	78	0.976188	0.999371	ko00240	LOC105230669(RnrS)	K10808
Genetic Information Processing	Folding, sorting and degradation	Ubiquitin mediated proteolysis	1	81	0.979415	0.999371	ko04120	LOC105232205(--)	K10456
Human Diseases	Cancers	Viral carcinogenesis	1	86	0.983856	0.999371	ko05203	LOC105230363(Gel)	K05768
Human Diseases	Infectious diseases	Epstein-Barr virus infection	1	99	0.991433	0.999371	ko05169	LOC105222207(Myc)	K04377
Human Diseases	Infectious diseases	HTLV-I infection	1	103	0.992955	0.999371	ko05166	LOC105222207(Myc)	K04377
Human Diseases	Neurodegenerative diseases	Huntington disease	2	149	0.993732	0.999371	ko05016	LOC105222909(Gnaq);LOC105233100(Grin2b)	K04634+K05210
Cellular Processes	Transport and catabolism	Endocytosis	1	109	0.994748	0.999371	ko04144	LOC105230971(InR)	K05087
Metabolism	Energy metabolism	Oxidative phosphorylation	1	111	0.995238	0.999371	ko00190	LOC105227818(ATP6V0A1)	K02154
Genetic Information Processing	Translation	RNA transport	1	117	0.996453	0.999371	ko03013	LOC105229288(EIF4EBP1)	K18644
Genetic Information Processing	Translation	Ribosome	1	123	0.997359	0.999371	ko03010	LOC115066478(UBI1)	K02927
Organismal Systems	Environmental adaptation	Thermogenesis	1	152	0.999371	0.999371	ko04714	LOC105230478(Npr1)	K12323

## Sheet: Glucose vs Glucose+YH
KEGG_A_class	KEGG_B_class	Pathway	Glucose-vs-Glucose-YH (185)	All (3266)	Pvalue	Qvalue	Pathway ID	Genes	K_IDs
Metabolism	Metabolism of terpenoids and polyketides	Insect hormone biosynthesis	12	37	4.07458e-07	8.75041e-05	ko00981	LOC105223822(SDR-1);LOC105223823(--);LOC105223827(SDR-1);LOC105224512(Aldh1b1);LOC105224514(ALDH2);LOC105224923(phm);LOC105224924(Cyp18a1);LOC105225180(pho2);LOC105227166(--);LOC105227167(PKS19);LOC105227882(SDR-1);LOC105232612(PGLP2)	K15890+K15890+K15890+K00128+K00128+K10720+K14985+K21013+K10718+K10718+K15890+K21013
Metabolism	Carbohydrate metabolism	Ascorbate and aldarate metabolism	11	32	6.50588e-07	8.75041e-05	ko00053	LOC105224512(Aldh1b1);LOC105224514(ALDH2);LOC105226135(miox);LOC105229550(UGT2A1);LOC105230262(UGT8);LOC105230325(ugt3);LOC105230804(UGT2B13);LOC105231227(UGT2B20);LOC105232622(Aldh7a1);LOC115065792(UGT2B13);LOC115066658(--)	K00128+K00128+K00469+K00699+K00699+K00699+K00699+K00699+K14085+K00699+K00699
Metabolism	Global and overview maps	Metabolic pathways	76	882	1.36513e-05	0.00122407	ko01100	LOC105221945(Hex-t2);LOC105222009(GlyP);LOC105222215(v1g246094);LOC105222327(GLO5);LOC105222689(Gld);LOC105222791(--);LOC105222808(Galt);LOC105222926(Gdh);LOC105222986(CHIA);LOC105223108(HMT-1);LOC105224026(PGP);LOC105224512(Aldh1b1);LOC105224514(ALDH2);LOC105224532(PLA2);LOC105224730(Hpd);LOC105224810(Idh1);LOC105224873(FAH);LOC105224947(Cryl1);LOC105225237(Oat);LOC105225353(AANAT1);LOC105225548…	K00844+K00688+K00826+K11517+K00115+K00072+K00965+K00261+K01183+K00547+K19269+K00128+K00128+K01047+K00457+K00031+K01555+K13247+K00819+K00669+K00901+K00731+K00731+K01800+K01077+K00273+K19572+K10249+K10249+K00710+K01077+K01908+K00753+K00827+K00728+K07127+K01189+K02154+K01080+K01080+K01080+K13247+K16055+K00314+K01934+K12373+K01594+K00699+K00108+K14677+K00699+K00699+K10808+K00815+K00787+K00789+K00699+…
Metabolism	Xenobiotics biodegradation and metabolism	Drug metabolism - cytochrome P450	12	57	5.70001e-05	0.0030666	ko00982	LOC105225817(GstD1);LOC105227725(GST1);LOC105228298(GSTT1);LOC105229550(UGT2A1);LOC105229681(GST1);LOC105229690(GstD1);LOC105230262(UGT8);LOC105230325(ugt3);LOC105230804(UGT2B13);LOC105231227(UGT2B20);LOC115065792(UGT2B13);LOC115066658(--)	K00799+K00799+K00799+K00699+K00799+K00799+K00699+K00699+K00699+K00699+K00699+K00699
Human Diseases	Cancers	Chemical carcinogenesis	12	57	5.70001e-05	0.0030666	ko05204	LOC105225817(GstD1);LOC105227725(GST1);LOC105228298(GSTT1);LOC105229550(UGT2A1);LOC105229681(GST1);LOC105229690(GstD1);LOC105230262(UGT8);LOC105230325(ugt3);LOC105230804(UGT2B13);LOC105231227(UGT2B20);LOC115065792(UGT2B13);LOC115066658(--)	K00799+K00799+K00799+K00699+K00799+K00799+K00699+K00699+K00699+K00699+K00699+K00699
Metabolism	Xenobiotics biodegradation and metabolism	Metabolism of xenobiotics by cytochrome P450	12	60	9.7029e-05	0.00371096	ko00980	LOC105225817(GstD1);LOC105227725(GST1);LOC105228298(GSTT1);LOC105229550(UGT2A1);LOC105229681(GST1);LOC105229690(GstD1);LOC105230262(UGT8);LOC105230325(ugt3);LOC105230804(UGT2B13);LOC105231227(UGT2B20);LOC115065792(UGT2B13);LOC115066658(--)	K00799+K00799+K00799+K00699+K00799+K00799+K00699+K00699+K00699+K00699+K00699+K00699
Metabolism	Amino acid metabolism	Tyrosine metabolism	7	21	9.85968e-05	0.00371096	ko00350	LOC105224730(Hpd);LOC105224873(FAH);LOC105225839(GstZ2);LOC105230711(Tat);LOC105233819(hgo);LOC105234241(amd);LOC115066680(hgo)	K00457+K01555+K01800+K00815+K00451+K01618+K00451
Metabolism	Lipid metabolism	Cutin, suberine and wax biosynthesis	5	10	0.000110363	0.00371096	ko00073	LOC105222769(wat);LOC105225825(wat);LOC105228879(FAR1);LOC105230858(far1);LOC105230898(Far1)	K13356+K13356+K13356+K13356+K13356
Metabolism	Xenobiotics biodegradation and metabolism	Drug metabolism - other enzymes	14	84	0.000203287	0.00607602	ko00983	LOC105225817(GstD1);LOC105227725(GST1);LOC105228298(GSTT1);LOC105229550(UGT2A1);LOC105229681(GST1);LOC105229690(GstD1);LOC105230262(UGT8);LOC105230325(ugt3);LOC105230669(RnrS);LOC105230804(UGT2B13);LOC105230951(XDH);LOC105231227(UGT2B20);LOC115065792(UGT2B13);LOC115066658(--)	K00799+K00799+K00799+K00699+K00799+K00799+K00699+K00699+K10808+K00699+K00106+K00699+K00699+K00699
Metabolism	Lipid metabolism	Steroid hormone biosynthesis	7	28	0.000715136	0.0192372	ko00140	LOC105229550(UGT2A1);LOC105230262(UGT8);LOC105230325(ugt3);LOC105230804(UGT2B13);LOC105231227(UGT2B20);LOC115065792(UGT2B13);LOC115066658(--)	K00699+K00699+K00699+K00699+K00699+K00699+K00699
Human Diseases	Drug resistance	Platinum drug resistance	9	48	0.00120897	0.0295649	ko01524	LOC105225577(Pdk1);LOC105225817(GstD1);LOC105227184(Msh6);LOC105227371(POLH);LOC105227725(GST1);LOC105228298(GSTT1);LOC105229681(GST1);LOC105229690(GstD1);LOC105231062(--)	K06276+K00799+K08737+K03509+K00799+K00799+K00799+K00799+K14686
Metabolism	Carbohydrate metabolism	Pentose and glucuronate interconversions	9	49	0.00140991	0.0316056	ko00040	LOC105224947(Cryl1);LOC105228395(CRYL1);LOC105229550(UGT2A1);LOC105230262(UGT8);LOC105230325(ugt3);LOC105230804(UGT2B13);LOC105231227(UGT2B20);LOC115065792(UGT2B13);LOC115066658(--)	K13247+K13247+K00699+K00699+K00699+K00699+K00699+K00699+K00699
Metabolism	Lipid metabolism	Glycerolipid metabolism	8	43	0.00238236	0.0467414	ko00561	LOC105224512(Aldh1b1);LOC105224514(ALDH2);LOC105225548(rdgA);LOC105227741(NAGA);LOC105227847(PLPP3);LOC105227848(PLPP1);LOC105227849(Plpp2);LOC105232622(Aldh7a1)	K00128+K00128+K00901+K01189+K01080+K01080+K01080+K14085
Metabolism	Metabolism of cofactors and vitamins	Retinol metabolism	7	34	0.00243264	0.0467414	ko00830	LOC105229550(UGT2A1);LOC105230262(UGT8);LOC105230325(ugt3);LOC105230804(UGT2B13);LOC105231227(UGT2B20);LOC115065792(UGT2B13);LOC115066658(--)	K00699+K00699+K00699+K00699+K00699+K00699+K00699
Organismal Systems	Digestive system	Fat digestion and absorption	6	26	0.00270507	0.0485109	ko04975	LOC105224532(PLA2);LOC105227847(PLPP3);LOC105227848(PLPP1);LOC105227849(Plpp2);LOC105231309(SLC27A4);LOC105232034(--)	K01047+K01080+K01080+K01080+K08745+K01047
Human Diseases	Cardiovascular diseases	Fluid shear stress and atherosclerosis	11	77	0.00356693	0.059969	ko05418	LOC105225122(dpp);LOC105225453(Act57B);LOC105225817(GstD1);LOC105226824(Cp1);LOC105227725(GST1);LOC105228298(GSTT1);LOC105229681(GST1);LOC105229690(GstD1);LOC105229889(Act87E);LOC105232205(--);LOC105232835(Ctla2a)	K04662+K05692+K00799+K01365+K00799+K00799+K00799+K00799+K05692+K10456+K01365
Metabolism	Amino acid metabolism	Arginine and proline metabolism	7	37	0.00403036	0.0635637	ko00330	LOC105224512(Aldh1b1);LOC105224514(ALDH2);LOC105225237(Oat);LOC105226309(daao-1);LOC105231755(P4HA2);LOC105232622(Aldh7a1);LOC105232635(Argk)	K00128+K00128+K00819+K00273+K00472+K14085+K00933
Organismal Systems	Digestive system	Bile secretion	8	47	0.00425333	0.0635637	ko04976	LOC105225576(Adcy9);LOC105229550(UGT2A1);LOC105230262(UGT8);LOC105230325(ugt3);LOC105230804(UGT2B13);LOC105231227(UGT2B20);LOC115065792(UGT2B13);LOC115066658(--)	K08049+K00699+K00699+K00699+K00699+K00699+K00699+K00699
Metabolism	Metabolism of other amino acids	Glutathione metabolism	9	59	0.00528024	0.0710645	ko00480	LOC105224810(Idh1);LOC105225817(GstD1);LOC105227725(GST1);LOC105228298(GSTT1);LOC105229681(GST1);LOC105229690(GstD1);LOC105230669(RnrS);LOC105230937(Anpep);LOC115065834(Ggct)	K00031+K00799+K00799+K00799+K00799+K00799+K10808+K11140+K00682
Metabolism	Amino acid metabolism	Histidine metabolism	3	7	0.00528361	0.0710645	ko00340	LOC105224512(Aldh1b1);LOC105224514(ALDH2);LOC105232622(Aldh7a1)	K00128+K00128+K14085
Metabolism	Lipid metabolism	Ether lipid metabolism	5	22	0.00660227	0.0845719	ko00565	LOC105224532(PLA2);LOC105227847(PLPP3);LOC105227848(PLPP1);LOC105227849(Plpp2);LOC105232034(--)	K01047+K01080+K01080+K01080+K01047
Metabolism	Metabolism of terpenoids and polyketides	Terpenoid backbone biosynthesis	6	32	0.00802017	0.0980648	ko00900	LOC105223822(SDR-1);LOC105223823(--);LOC105223827(SDR-1);LOC105226408(PDSS1);LOC105227882(SDR-1);LOC105230724(FDPS)	K15890+K15890+K15890+K12504+K15890+K00787
Organismal Systems	Aging	Longevity regulating pathway - worm	10	77	0.0105775	0.120268	ko04212	LOC105222769(wat);LOC105225817(GstD1);LOC105225825(wat);LOC105227725(GST1);LOC105228298(GSTT1);LOC105228879(FAR1);LOC105229681(GST1);LOC105229690(GstD1);LOC105230858(far1);LOC105230898(Far1)	K13356+K00799+K13356+K00799+K00799+K13356+K00799+K00799+K13356+K13356
Metabolism	Metabolism of cofactors and vitamins	Porphyrin and chlorophyll metabolism	7	44	0.0107302	0.120268	ko00860	LOC105229550(UGT2A1);LOC105230262(UGT8);LOC105230325(ugt3);LOC105230804(UGT2B13);LOC105231227(UGT2B20);LOC115065792(UGT2B13);LOC115066658(--)	K00699+K00699+K00699+K00699+K00699+K00699+K00699
Cellular Processes	Transport and catabolism	Peroxisome	10	78	0.0115519	0.124298	ko04146	LOC105222327(GLO5);LOC105222769(wat);LOC105224810(Idh1);LOC105225825(wat);LOC105226309(daao-1);LOC105228879(FAR1);LOC105229660(daao-1);LOC105230858(far1);LOC105230898(Far1);LOC105230951(XDH)	K11517+K13356+K00031+K13356+K00273+K13356+K00272+K13356+K13356+K00106
Genetic Information Processing	Replication and repair	DNA replication	6	35	0.0124768	0.129086	ko03030	LOC105222969(Dna2);LOC105223304(Mcm6);LOC105223305(PCNA);LOC105226613(Mcm2);LOC105229089(Mcm7);LOC105232527(DNApol-alpha60)	K10742+K02542+K04802+K02540+K02210+K02685
Metabolism	Metabolism of cofactors and vitamins	One carbon pool by folate	3	10	0.0159641	0.154545	ko00670	LOC105223295(aldh1l1);LOC105229163(5FCL);LOC105231540(Dhfr)	K00289+K01934+K00287
Metabolism	Amino acid metabolism	Glycine, serine and threonine metabolism	5	27	0.0160865	0.154545	ko00260	LOC105226309(daao-1);LOC105227212(AGXT2);LOC105228945(Sardh);LOC105229638(Gld);LOC105232622(Aldh7a1)	K00273+K00827+K00314+K00108+K14085
Metabolism	Carbohydrate metabolism	Amino sugar and nucleotide sugar metabolism	7	48	0.0170403	0.158064	ko00520	LOC105221945(Hex-t2);LOC105222808(Galt);LOC105222986(CHIA);LOC105226562(chs-2);LOC105229216(HEXB);LOC109579331(--);LOC115065892(--)	K00844+K00965+K01183+K00698+K12373+K01183+K01183
Metabolism	Amino acid metabolism	Tryptophan metabolism	4	19	0.0197517	0.177107	ko00380	LOC105224512(Aldh1b1);LOC105224514(ALDH2);LOC105225353(AANAT1);LOC105232622(Aldh7a1)	K00128+K00128+K00669+K14085
Human Diseases	Substance dependence	Cocaine addiction	4	20	0.0236238	0.204994	ko05030	LOC105227310(DAT);LOC105228430(Slc18a2);LOC105233100(Grin2b);LOC109580066(--)	K05036+K08155+K05210+K05210
Cellular Processes	Transport and catabolism	Lysosome	11	105	0.0334267	0.266689	ko04142	LOC105223379(Lip1);LOC105223550(Dnase2);LOC105223565(--);LOC105224023(CLN3);LOC105226824(Cp1);LOC105227741(NAGA);LOC105227769(Cd63);LOC105227818(ATP6V0A1);LOC105227880(mfsd8);LOC105229216(HEXB);LOC105232835(Ctla2a)	K01052+K01158+K12383+K12389+K01365+K01189+K06497+K02154+K12307+K12373+K01365
Organismal Systems	Endocrine system	Renin-angiotensin system	3	13	0.0335674	0.266689	ko04614	LOC105229185(--);LOC105230937(Anpep);LOC105233746(ANPEP)	K01283+K11140+K11141
Metabolism	Lipid metabolism	Glycerophospholipid metabolism	7	55	0.0337079	0.266689	ko00564	LOC105224532(PLA2);LOC105225548(rdgA);LOC105227847(PLPP3);LOC105227848(PLPP1);LOC105227849(Plpp2);LOC105229768(ACHE1);LOC105232034(--)	K01047+K00901+K01080+K01080+K01080+K01049+K01047
Metabolism	Amino acid metabolism	Cysteine and methionine metabolism	5	33	0.0359832	0.268874	ko00270	LOC105222215(v1g246094);LOC105223108(HMT-1);LOC105227212(AGXT2);LOC105230711(Tat);LOC105230754(Sam-S)	K00826+K00547+K00827+K00815+K00789
Metabolism	Amino acid metabolism	Valine, leucine and isoleucine degradation	5	33	0.0359832	0.268874	ko00280	LOC105222215(v1g246094);LOC105224512(Aldh1b1);LOC105224514(ALDH2);LOC105227212(AGXT2);LOC105232622(Aldh7a1)	K00826+K00128+K00128+K00827+K14085
Metabolism	Amino acid metabolism	Phenylalanine metabolism	2	6	0.0411601	0.283899	ko00360	LOC105224730(Hpd);LOC105230711(Tat)	K00457+K00815
Metabolism	Lipid metabolism	Linoleic acid metabolism	2	6	0.0411601	0.283899	ko00591	LOC105224532(PLA2);LOC105232034(--)	K01047+K01047
Metabolism	Glycan biosynthesis and metabolism	Glycosphingolipid biosynthesis - globo and isoglobo series	2	6	0.0411601	0.283899	ko00603	LOC105227741(NAGA);LOC105229216(HEXB)	K01189+K12373
Metabolism	Amino acid metabolism	Alanine, aspartate and glutamate metabolism	4	25	0.0495389	0.333149	ko00250	LOC105222926(Gdh);LOC105227212(AGXT2);LOC105229660(daao-1);LOC105232726(ASN2)	K00261+K00827+K00272+K01953
Metabolism	Lipid metabolism	Sphingolipid metabolism	4	26	0.0560512	0.347033	ko00600	LOC105227741(NAGA);LOC105227847(PLPP3);LOC105227848(PLPP1);LOC105227849(Plpp2)	K01189+K01080+K01080+K01080
Metabolism	Amino acid metabolism	Valine, leucine and isoleucine biosynthesis	1	1	0.0566442	0.347033	ko00290	LOC105222215(v1g246094)	K00826
Metabolism	Metabolism of other amino acids	D-Arginine and D-ornithine metabolism	1	1	0.0566442	0.347033	ko00472	LOC105226309(daao-1)	K00273
Metabolism	Energy metabolism	Nitrogen metabolism	3	16	0.0580538	0.347033	ko00910	LOC105222247(cahz);LOC105222926(Gdh);LOC105225061(Ca13)	K01672+K00261+K01672
Metabolism	Global and overview maps	2-Oxocarboxylic acid metabolism	3	16	0.0580538	0.347033	ko01210	LOC105222215(v1g246094);LOC105224810(Idh1);LOC105229765(Acy1b)	K00826+K00031+K14677
Human Diseases	Substance dependence	Amphetamine addiction	5	38	0.0607264	0.355117	ko05031	LOC105227310(DAT);LOC105228430(Slc18a2);LOC105231913(Syx1A);LOC105233100(Grin2b);LOC109580066(--)	K05036+K08155+K04560+K05210+K05210
Metabolism	Metabolism of other amino acids	beta-Alanine metabolism	3	17	0.0676544	0.379147	ko00410	LOC105224512(Aldh1b1);LOC105224514(ALDH2);LOC105232622(Aldh7a1)	K00128+K00128+K14085
Organismal Systems	Digestive system	Vitamin digestion and absorption	3	17	0.0676544	0.379147	ko04977	LOC105221974(slc46a1);LOC105225580(Cubn);LOC105232645(vanin-like)	K14613+K14616+K01435
Human Diseases	Cardiovascular diseases	Dilated cardiomyopathy (DCM)	4	28	0.0703838	0.383664	ko05414	LOC105225453(Act57B);LOC105225576(Adcy9);LOC105229889(Act87E);LOC105231331(CACNA2D3)	K05692+K08049+K05692+K04860
Human Diseases	Immune diseases	Systemic lupus erythematosus	2	8	0.071313	0.383664	ko05322	LOC105233100(Grin2b);LOC109580066(--)	K05210+K05210
Organismal Systems	Endocrine system	Oxytocin signaling pathway	7	66	0.0772023	0.394821	ko04921	LOC105222909(Gnaq);LOC105225453(Act57B);LOC105225576(Adcy9);LOC105229889(Act87E);LOC105230478(Npr1);LOC105231331(CACNA2D3);LOC109579326(Gnaq)	K04634+K05692+K08049+K05692+K12323+K04860+K04634
Human Diseases	Cardiovascular diseases	Arrhythmogenic right ventricular cardiomyopathy (ARVC)	3	18	0.0779256	0.394821	ko05412	LOC105225453(Act57B);LOC105229889(Act87E);LOC105231331(CACNA2D3)	K05692+K05692+K04860
Metabolism	Amino acid metabolism	Lysine degradation	5	41	0.0792578	0.394821	ko00310	LOC105222381(TMLHE);LOC105223355(BBOX1);LOC105224512(Aldh1b1);LOC105224514(ALDH2);LOC105232622(Aldh7a1)	K00474+K00471+K00128+K00128+K14085
Organismal Systems	Digestive system	Gastric acid secretion	5	41	0.0792578	0.394821	ko04971	LOC105222909(Gnaq);LOC105225453(Act57B);LOC105225576(Adcy9);LOC105229889(Act87E);LOC109579326(Gnaq)	K04634+K05692+K08049+K05692+K04634
Human Diseases	Cardiovascular diseases	Hypertrophic cardiomyopathy (HCM)	4	30	0.0864095	0.412002	ko05410	LOC105225453(Act57B);LOC105229185(--);LOC105229889(Act87E);LOC105231331(CACNA2D3)	K05692+K01283+K05692+K04860
Human Diseases	Cancers	Hepatocellular carcinoma	9	95	0.0865916	0.412002	ko05225	LOC105222207(Myc);LOC105225453(Act57B);LOC105225817(GstD1);LOC105227725(GST1);LOC105228298(GSTT1);LOC105229681(GST1);LOC105229690(GstD1);LOC105229889(Act87E);LOC105232205(--)	K04377+K05692+K00799+K00799+K00799+K00799+K00799+K05692+K10456
Human Diseases	Substance dependence	Nicotine addiction	2	9	0.0883583	0.412002	ko05033	LOC105233100(Grin2b);LOC109580066(--)	K05210+K05210
Environmental Information Processing	Signal transduction	Jak-STAT signaling pathway	3	19	0.0888333	0.412002	ko04630	LOC105222207(Myc);LOC105231214(SOCS5);LOC105231838(Stat92E)	K04377+K04698+K11224
Organismal Systems	Nervous system	Glutamatergic synapse	5	43	0.0931157	0.421562	ko04724	LOC105222909(Gnaq);LOC105225576(Adcy9);LOC105233100(Grin2b);LOC109579326(Gnaq);LOC109580066(--)	K04634+K08049+K05210+K04634+K05210
Environmental Information Processing	Signal transduction	Hippo signaling pathway -fly	6	56	0.0944174	0.421562	ko04391	LOC105222207(Myc);LOC105223592(ds);LOC105223634(--);LOC105223641(--);LOC105225453(Act57B);LOC105229889(Act87E)	K04377+K16507+K16689+K16689+K05692+K05692
Environmental Information Processing	Signal transduction	Rap1 signaling pathway	7	70	0.0986603	0.421562	ko04015	LOC105222909(Gnaq);LOC105225453(Act57B);LOC105225576(Adcy9);LOC105229889(Act87E);LOC105233100(Grin2b);LOC109579326(Gnaq);LOC109580066(--)	K04634+K05692+K08049+K05692+K05210+K04634+K05210
Metabolism	Glycan biosynthesis and metabolism	Mucin type O-glycan biosynthesis	3	20	0.100341	0.421562	ko00512	LOC105225673(C1GalTA);LOC105225674(C1GalTA);LOC105226711(gly-5)	K00731+K00731+K00710
Organismal Systems	Endocrine system	Cortisol synthesis and secretion	3	20	0.100341	0.421562	ko04927	LOC105222909(Gnaq);LOC105225576(Adcy9);LOC109579326(Gnaq)	K04634+K08049+K04634
Organismal Systems	Endocrine system	Renin secretion	4	32	0.104044	0.421562	ko04924	LOC105222909(Gnaq);LOC105229185(--);LOC105230478(Npr1);LOC109579326(Gnaq)	K04634+K01283+K12323+K04634
Metabolism	Metabolism of cofactors and vitamins	Ubiquinone and other terpenoid-quinone biosynthesis	2	10	0.106457	0.421562	ko00130	LOC105224730(Hpd);LOC105230711(Tat)	K00457+K00815
Cellular Processes	Cell growth and death	Apoptosis	6	58	0.107454	0.421562	ko04210	LOC105225453(Act57B);LOC105225577(Pdk1);LOC105225811(CASP7);LOC105226824(Cp1);LOC105229889(Act87E);LOC105232835(Ctla2a)	K05692+K06276+K04397+K01365+K05692+K01365
Organismal Systems	Immune system	Platelet activation	5	45	0.108133	0.421562	ko04611	LOC105222909(Gnaq);LOC105225453(Act57B);LOC105225576(Adcy9);LOC105229889(Act87E);LOC109579326(Gnaq)	K04634+K05692+K08049+K05692+K04634
Organismal Systems	Environmental adaptation	Circadian entrainment	5	45	0.108133	0.421562	ko04713	LOC105222909(Gnaq);LOC105225576(Adcy9);LOC105233100(Grin2b);LOC109579326(Gnaq);LOC109580066(--)	K04634+K08049+K05210+K04634+K05210
Organismal Systems	Nervous system	Serotonergic synapse	5	45	0.108133	0.421562	ko04726	LOC105222909(Gnaq);LOC105223854(SerT);LOC105228430(Slc18a2);LOC105230290(HTR2C);LOC109579326(Gnaq)	K04634+K05037+K08155+K04157+K04634
Metabolism	Metabolism of other amino acids	D-Glutamine and D-glutamate metabolism	1	2	0.110096	0.423084	ko00471	LOC105222926(Gdh)	K00261
Organismal Systems	Circulatory system	Vascular smooth muscle contraction	6	59	0.114306	0.433073	ko04270	LOC105222909(Gnaq);LOC105224532(PLA2);LOC105225576(Adcy9);LOC105230478(Npr1);LOC105232034(--);LOC109579326(Gnaq)	K04634+K01047+K08049+K12323+K01047+K04634
Cellular Processes	Transport and catabolism	Phagosome	7	73	0.116703	0.436016	ko04145	LOC105222583(thbs3a);LOC105223482(Mbl2);LOC105225453(Act57B);LOC105226824(Cp1);LOC105227818(ATP6V0A1);LOC105229889(Act87E);LOC105232835(Ctla2a)	K04659+K06560+K05692+K01365+K02154+K05692+K01365
Metabolism	Metabolism of cofactors and vitamins	Folate biosynthesis	4	34	0.12318	0.453908	ko00790	LOC105222791(--);LOC105226111(Alp-m);LOC105227008(Alp4);LOC105231540(Dhfr)	K00072+K01077+K01077+K00287
Organismal Systems	Nervous system	Dopaminergic synapse	6	61	0.128653	0.467672	ko04728	LOC105222909(Gnaq);LOC105227310(DAT);LOC105228430(Slc18a2);LOC105233100(Grin2b);LOC109579326(Gnaq);LOC109580066(--)	K04634+K05036+K08155+K05210+K04634+K05210
Human Diseases	Cancers	Prostate cancer	6	63	0.143829	0.513717	ko05215	LOC105225577(Pdk1);LOC105225817(GstD1);LOC105227725(GST1);LOC105228298(GSTT1);LOC105229681(GST1);LOC105229690(GstD1)	K06276+K00799+K00799+K00799+K00799+K00799
Metabolism	Glycan biosynthesis and metabolism	Other types of O-glycan biosynthesis	2	12	0.14514	0.513717	ko00514	LOC105221842(fng);LOC105227401(rt)	K05948+K00728
Organismal Systems	Sensory system	Phototransduction - fly	4	37	0.154424	0.539482	ko04745	LOC105222909(Gnaq);LOC105225453(Act57B);LOC105229889(Act87E);LOC109579326(Gnaq)	K04634+K05692+K05692+K04634
Human Diseases	Cancers	Pathways in cancer	14	185	0.160433	0.539799	ko05200	LOC105222207(Myc);LOC105222909(Gnaq);LOC105225122(dpp);LOC105225576(Adcy9);LOC105225811(CASP7);LOC105225817(GstD1);LOC105227184(Msh6);LOC105227725(GST1);LOC105228298(GSTT1);LOC105229681(GST1);LOC105229690(GstD1);LOC105231838(Stat92E);LOC105232205(--);LOC109579326(Gnaq)	K04377+K04634+K04662+K08049+K04397+K00799+K08737+K00799+K00799+K00799+K00799+K11224+K10456+K04634
Metabolism	Biosynthesis of other secondary metabolites	Neomycin, kanamycin and gentamicin biosynthesis	1	3	0.160535	0.539799	ko00524	LOC105221945(Hex-t2)	K00844
Organismal Systems	Immune system	Complement and coagulation cascades	1	3	0.160535	0.539799	ko04610	LOC105229510(F11)	K01323
Metabolism	Lipid metabolism	alpha-Linolenic acid metabolism	2	13	0.165425	0.549375	ko00592	LOC105224532(PLA2);LOC105232034(--)	K01047+K01047
Organismal Systems	Digestive system	Pancreatic secretion	7	82	0.180096	0.590804	ko04972	LOC105222909(Gnaq);LOC105224532(PLA2);LOC105225576(Adcy9);LOC105225976(Slc12a2);LOC105228391(TRYP4);LOC105232034(--);LOC109579326(Gnaq)	K04634+K01047+K08049+K10951+K01312+K01047+K04634
Metabolism	Lipid metabolism	Arachidonic acid metabolism	2	14	0.186165	0.603355	ko00590	LOC105224532(PLA2);LOC105232034(--)	K01047+K01047
Human Diseases	Infectious diseases	Vibrio cholerae infection	5	54	0.188443	0.603465	ko05110	LOC105225453(Act57B);LOC105225576(Adcy9);LOC105225976(Slc12a2);LOC105227818(ATP6V0A1);LOC105229889(Act87E)	K05692+K08049+K10951+K02154+K05692
Metabolism	Amino acid metabolism	Arginine biosynthesis	2	15	0.207244	0.63068	ko00220	LOC105222926(Gdh);LOC105229765(Acy1b)	K00261+K14677
Metabolism	Amino acid metabolism	Phenylalanine, tyrosine and tryptophan biosynthesis	1	4	0.20813	0.63068	ko00400	LOC105230711(Tat)	K00815
Metabolism	Glycan biosynthesis and metabolism	Mannose type O-glycan biosyntheis	1	4	0.20813	0.63068	ko00515	LOC105227401(rt)	K00728
Metabolism	Metabolism of cofactors and vitamins	Biotin metabolism	1	4	0.20813	0.63068	ko00780	LOC105232645(vanin-like)	K01435
Human Diseases	Cancers	Choline metabolism in cancer	5	56	0.208664	0.63068	ko05231	LOC105225548(rdgA);LOC105225577(Pdk1);LOC105227847(PLPP3);LOC105227848(PLPP1);LOC105227849(Plpp2)	K00901+K06276+K01080+K01080+K01080
Metabolism	Global and overview maps	Biosynthesis of amino acids	5	57	0.219033	0.654061	ko01230	LOC105222215(v1g246094);LOC105224810(Idh1);LOC105229765(Acy1b);LOC105230711(Tat);LOC105230754(Sam-S)	K00826+K00031+K14677+K00815+K00789
Organismal Systems	Nervous system	Long-term potentiation	4	43	0.224292	0.654061	ko04720	LOC105222909(Gnaq);LOC105233100(Grin2b);LOC109579326(Gnaq);LOC109580066(--)	K04634+K05210+K04634+K05210
Organismal Systems	Endocrine system	Prolactin signaling pathway	3	29	0.224384	0.654061	ko04917	LOC105222808(Galt);LOC105231214(SOCS5);LOC105231838(Stat92E)	K00965+K04698+K11224
Metabolism	Lipid metabolism	Fatty acid elongation	2	16	0.228557	0.654061	ko00062	LOC105226450(eloF);LOC105226451(eloF)	K10249+K10249
Environmental Information Processing	Signaling molecules and interaction	ECM-receptor interaction	2	16	0.228557	0.654061	ko04512	LOC105222583(thbs3a);LOC105230174(Col1a2)	K04659+K19719
Organismal Systems	Endocrine system	Aldosterone synthesis and secretion	4	44	0.236673	0.670157	ko04925	LOC105222909(Gnaq);LOC105225576(Adcy9);LOC105230478(Npr1);LOC109579326(Gnaq)	K04634+K08049+K12323+K04634
Organismal Systems	Sensory system	Inflammatory mediator regulation of TRP channels	4	45	0.249213	0.698316	ko04750	LOC105222909(Gnaq);LOC105225576(Adcy9);LOC105230290(HTR2C);LOC109579326(Gnaq)	K04634+K08049+K04157+K04634
Human Diseases	Immune diseases	Rheumatoid arthritis	3	31	0.255216	0.707765	ko05323	LOC105226824(Cp1);LOC105227818(ATP6V0A1);LOC105232835(Ctla2a)	K01365+K02154+K01365
Cellular Processes	Cell growth and death	Cell cycle	6	76	0.259171	0.711397	ko04110	LOC105222207(Myc);LOC105223304(Mcm6);LOC105223305(PCNA);LOC105226613(Mcm2);LOC105229089(Mcm7);LOC105230936(Orc2)	K04377+K02542+K04802+K02540+K02210+K02604
Human Diseases	Substance dependence	Alcoholism	4	46	0.261894	0.711612	ko05034	LOC105227310(DAT);LOC105228430(Slc18a2);LOC105233100(Grin2b);LOC109580066(--)	K05036+K08155+K05210+K05210
Organismal Systems	Immune system	Antigen processing and presentation	2	18	0.271521	0.711912	ko04612	LOC105226824(Cp1);LOC105232835(Ctla2a)	K01365+K01365
Human Diseases	Infectious diseases	African trypanosomiasis	2	18	0.271521	0.711912	ko05143	LOC105222909(Gnaq);LOC109579326(Gnaq)	K04634+K04634
Human Diseases	Cardiovascular diseases	Viral myocarditis	2	18	0.271521	0.711912	ko05416	LOC105225453(Act57B);LOC105229889(Act87E)	K05692+K05692
Organismal Systems	Nervous system	Cholinergic synapse	4	47	0.274698	0.711912	ko04725	LOC105222909(Gnaq);LOC105225576(Adcy9);LOC105229768(ACHE1);LOC109579326(Gnaq)	K04634+K08049+K01049+K04634
Metabolism	Nucleotide metabolism	Purine metabolism	9	125	0.275238	0.711912	ko00230	LOC105225576(Adcy9);LOC105226353(ada2);LOC105227488(SPCC285.04);LOC105230064(Ac76E);LOC105230478(Npr1);LOC105230669(RnrS);LOC105230951(XDH);LOC105232527(DNApol-alpha60);LOC105232649(ada2)	K08049+K19572+K07127+K01768+K12323+K10808+K00106+K02685+K19572
Metabolism	Carbohydrate metabolism	Galactose metabolism	3	33	0.286597	0.713586	ko00052	LOC105221945(Hex-t2);LOC105222808(Galt);LOC105227741(NAGA)	K00844+K00965+K01189
Metabolism	Metabolism of cofactors and vitamins	Thiamine metabolism	2	19	0.293014	0.713586	ko00730	LOC105226111(Alp-m);LOC105227008(Alp4)	K01077+K01077
Genetic Information Processing	Replication and repair	Mismatch repair	2	19	0.293014	0.713586	ko03430	LOC105223305(PCNA);LOC105227184(Msh6)	K04802+K08737
Human Diseases	Cancers	Acute myeloid leukemia	2	19	0.293014	0.713586	ko05221	LOC105222207(Myc);LOC105231838(Stat92E)	K04377+K11224
Environmental Information Processing	Signal transduction	Phospholipase D signaling pathway	5	64	0.295357	0.713586	ko04072	LOC105225548(rdgA);LOC105225576(Adcy9);LOC105227847(PLPP3);LOC105227848(PLPP1);LOC105227849(Plpp2)	K00901+K08049+K01080+K01080+K01080
Metabolism	Biosynthesis of other secondary metabolites	Caffeine metabolism	1	6	0.295415	0.713586	ko00232	LOC105230951(XDH)	K00106
Human Diseases	Infectious diseases	Malaria	1	6	0.295415	0.713586	ko05144	LOC105222583(thbs3a)	K04659
Organismal Systems	Immune system	Toll and Imd signaling pathway	6	80	0.298878	0.713586	ko04624	LOC105224657(Spn42Dd);LOC105228508(modSP);LOC105229884(snk);LOC105231780(CEC2);LOC115066596(Cfi);LOC115066711(--)	K20698+K20674+K20675+K20696+K20671+K20694
Metabolism	Carbohydrate metabolism	Starch and sucrose metabolism	3	34	0.302412	0.713586	ko00500	LOC105221945(Hex-t2);LOC105222009(GlyP);LOC105228748(tpsA)	K00844+K00688+K16055
Human Diseases	Cancers	Central carbon metabolism in cancer	3	34	0.302412	0.713586	ko05230	LOC105221945(Hex-t2);LOC105222207(Myc);LOC105224810(Idh1)	K00844+K04377+K00031
Cellular Processes	Cellular community - eukaryotes	Gap junction	4	50	0.313661	0.729133	ko04540	LOC105222909(Gnaq);LOC105225576(Adcy9);LOC105230290(HTR2C);LOC109579326(Gnaq)	K04634+K08049+K04157+K04634
Human Diseases	Drug resistance	Antifolate resistance	2	20	0.314422	0.729133	ko01523	LOC105221974(slc46a1);LOC105231540(Dhfr)	K14613+K00287
Metabolism	Carbohydrate metabolism	Glycolysis / Gluconeogenesis	4	51	0.326774	0.745514	ko00010	LOC105221945(Hex-t2);LOC105224512(Aldh1b1);LOC105224514(ALDH2);LOC105232622(Aldh7a1)	K00844+K00128+K00128+K14085
Human Diseases	Cancers	Proteoglycans in cancer	7	99	0.327943	0.745514	ko05205	LOC105222207(Myc);LOC105225453(Act57B);LOC105225577(Pdk1);LOC105226824(Cp1);LOC105227769(Cd63);LOC105229889(Act87E);LOC105232835(Ctla2a)	K04377+K05692+K06276+K01365+K06497+K05692+K01365
Metabolism	Lipid metabolism	Fatty acid degradation	3	36	0.334139	0.745514	ko00071	LOC105224512(Aldh1b1);LOC105224514(ALDH2);LOC105232622(Aldh7a1)	K00128+K00128+K14085
Organismal Systems	Excretory system	Endocrine and other factor-regulated calcium reabsorption	3	36	0.334139	0.745514	ko04961	LOC105222909(Gnaq);LOC105225576(Adcy9);LOC109579326(Gnaq)	K04634+K08049+K04634
Metabolism	Glycan biosynthesis and metabolism	Glycosphingolipid biosynthesis - ganglio series	1	7	0.335399	0.745514	ko00604	LOC105229216(HEXB)	K12373
Environmental Information Processing	Signaling molecules and interaction	Neuroactive ligand-receptor interaction	5	68	0.340886	0.745514	ko04080	LOC105228391(TRYP4);LOC105230290(HTR2C);LOC105233100(Grin2b);LOC105233744(PK1-R);LOC109580066(--)	K01312+K04157+K05210+K05052+K05210
Organismal Systems	Endocrine system	Thyroid hormone signaling pathway	5	68	0.340886	0.745514	ko04919	LOC105222207(Myc);LOC105225122(dpp);LOC105225453(Act57B);LOC105225577(Pdk1);LOC105229889(Act87E)	K04377+K04662+K05692+K06276+K05692
Organismal Systems	Endocrine system	Insulin secretion	4	53	0.353091	0.76598	ko04911	LOC105222909(Gnaq);LOC105225576(Adcy9);LOC105231913(Syx1A);LOC109579326(Gnaq)	K04634+K08049+K04560+K04634
Organismal Systems	Endocrine system	Regulation of lipolysis in adipocyte	2	22	0.356755	0.767736	ko04923	LOC105225576(Adcy9);LOC105230478(Npr1)	K08049+K12323
Organismal Systems	Endocrine system	Thyroid hormone synthesis	3	38	0.365815	0.780986	ko04918	LOC105222909(Gnaq);LOC105225576(Adcy9);LOC109579326(Gnaq)	K04634+K08049+K04634
Metabolism	Lipid metabolism	Steroid biosynthesis	1	8	0.373126	0.784148	ko00100	LOC105223379(Lip1)	K01052
Environmental Information Processing	Signaling molecules and interaction	Cell adhesion molecules (CAMs)	1	8	0.373126	0.784148	ko04514	LOC105222809(NRXN3)	K07377
Metabolism	Carbohydrate metabolism	Pyruvate metabolism	3	39	0.381571	0.795679	ko00620	LOC105224512(Aldh1b1);LOC105224514(ALDH2);LOC105232622(Aldh7a1)	K00128+K00128+K14085
Human Diseases	Cancers	Endometrial cancer	2	24	0.398126	0.820494	ko05213	LOC105222207(Myc);LOC105225577(Pdk1)	K04377+K06276
Metabolism	Metabolism of other amino acids	Taurine and hypotaurine metabolism	1	9	0.408722	0.820494	ko00430	LOC105229437(Csad)	K01594
Environmental Information Processing	Signaling molecules and interaction	Cytokine-cytokine receptor interaction	1	9	0.408722	0.820494	ko04060	LOC105225122(dpp)	K04662
Organismal Systems	Immune system	Hematopoietic cell lineage	1	9	0.408722	0.820494	ko04640	LOC105230937(Anpep)	K11140
Human Diseases	Cancers	Bladder cancer	1	9	0.408722	0.820494	ko05219	LOC105222207(Myc)	K04377
Organismal Systems	Digestive system	Mineral absorption	2	25	0.418354	0.829441	ko04978	LOC105221974(slc46a1);LOC105231062(--)	K14613+K14686
Cellular Processes	Cellular community - eukaryotes	Focal adhesion	5	75	0.421368	0.829441	ko04510	LOC105222583(thbs3a);LOC105225453(Act57B);LOC105225577(Pdk1);LOC105229889(Act87E);LOC105230174(Col1a2)	K04659+K05692+K06276+K05692+K19719
Cellular Processes	Cell growth and death	Necroptosis	3	42	0.428247	0.829441	ko04217	LOC105222009(GlyP);LOC105222926(Gdh);LOC105231838(Stat92E)	K00688+K00261+K11224
Human Diseases	Infectious diseases	Chagas disease (American trypanosomiasis)	3	42	0.428247	0.829441	ko05142	LOC105222909(Gnaq);LOC105229185(--);LOC109579326(Gnaq)	K04634+K01283+K04634
Organismal Systems	Circulatory system	Adrenergic signaling in cardiomyocytes	4	59	0.431679	0.829441	ko04261	LOC105222909(Gnaq);LOC105225576(Adcy9);LOC105231331(CACNA2D3);LOC109579326(Gnaq)	K04634+K08049+K04860+K04634
Organismal Systems	Digestive system	Salivary secretion	4	59	0.431679	0.829441	ko04970	LOC105222909(Gnaq);LOC105225576(Adcy9);LOC105225976(Slc12a2);LOC109579326(Gnaq)	K04634+K08049+K10951+K04634
Organismal Systems	Endocrine system	Parathyroid hormone synthesis, secretion and action	3	43	0.443543	0.842202	ko04928	LOC105222909(Gnaq);LOC105225576(Adcy9);LOC109579326(Gnaq)	K04634+K08049+K04634
Environmental Information Processing	Signal transduction	cGMP - PKG signaling pathway	4	60	0.444583	0.842202	ko04022	LOC105222909(Gnaq);LOC105225576(Adcy9);LOC105230478(Npr1);LOC109579326(Gnaq)	K04634+K08049+K12323+K04634
Human Diseases	Cancers	Chronic myeloid leukemia	2	27	0.457743	0.861068	ko05220	LOC105222207(Myc);LOC105231838(Stat92E)	K04377+K11224
Human Diseases	Neurodegenerative diseases	Amyotrophic lateral sclerosis (ALS)	2	28	0.476857	0.890795	ko05014	LOC105233100(Grin2b);LOC109580066(--)	K05210+K05210
Organismal Systems	Aging	Longevity regulating pathway - multiple species	3	46	0.488415	0.906094	ko04213	LOC105225576(Adcy9);LOC105229288(EIF4EBP1);LOC105230064(Ac76E)	K08049+K18644+K01768
Environmental Information Processing	Signal transduction	Calcium signaling pathway	4	64	0.495215	0.912417	ko04020	LOC105222909(Gnaq);LOC105225576(Adcy9);LOC105230290(HTR2C);LOC109579326(Gnaq)	K04634+K08049+K04157+K04634
Human Diseases	Cancers	Thyroid cancer	1	12	0.50389	0.917524	ko05216	LOC105222207(Myc)	K04377
Human Diseases	Cancers	Non-small cell lung cancer	2	30	0.513833	0.917524	ko05223	LOC105225577(Pdk1);LOC105231838(Stat92E)	K06276+K11224
Organismal Systems	Endocrine system	GnRH signaling pathway	3	48	0.517346	0.917524	ko04912	LOC105222909(Gnaq);LOC105225576(Adcy9);LOC109579326(Gnaq)	K04634+K08049+K04634
Organismal Systems	Endocrine system	Melanogenesis	3	48	0.517346	0.917524	ko04916	LOC105222909(Gnaq);LOC105225576(Adcy9);LOC109579326(Gnaq)	K04634+K08049+K04634
Environmental Information Processing	Signal transduction	Apelin signaling pathway	3	49	0.531481	0.917524	ko04371	LOC105222909(Gnaq);LOC105225576(Adcy9);LOC109579326(Gnaq)	K04634+K08049+K04634
Organismal Systems	Nervous system	Synaptic vesicle cycle	3	49	0.531481	0.917524	ko04721	LOC105227818(ATP6V0A1);LOC105228430(Slc18a2);LOC105231913(Syx1A)	K02154+K08155+K04560
Human Diseases	Endocrine and metabolic diseases	Insulin resistance	3	49	0.531481	0.917524	ko04931	LOC105222009(GlyP);LOC105225577(Pdk1);LOC105231309(SLC27A4)	K00688+K06276+K08745
Environmental Information Processing	Signal transduction	TGF-beta signaling pathway	2	31	0.531669	0.917524	ko04350	LOC105222207(Myc);LOC105225122(dpp)	K04377+K04662
Metabolism	Metabolism of cofactors and vitamins	Pantothenate and CoA biosynthesis	1	13	0.532095	0.917524	ko00770	LOC105222215(v1g246094)	K00826
Organismal Systems	Excretory system	Proximal tubule bicarbonate reclamation	1	13	0.532095	0.917524	ko04964	LOC105222926(Gdh)	K00261
Organismal Systems	Immune system	Fc gamma R-mediated phagocytosis	3	50	0.545385	0.934449	ko04666	LOC105227847(PLPP3);LOC105227848(PLPP1);LOC105227849(Plpp2)	K01080+K01080+K01080
Human Diseases	Infectious diseases	Bacterial invasion of epithelial cells	2	32	0.549056	0.934786	ko05100	LOC105225453(Act57B);LOC105229889(Act87E)	K05692+K05692
Environmental Information Processing	Signal transduction	Hippo signaling pathway	4	69	0.555618	0.939323	ko04390	LOC105222207(Myc);LOC105225122(dpp);LOC105225453(Act57B);LOC105229889(Act87E)	K04377+K04662+K05692+K05692
Organismal Systems	Endocrine system	Ovarian Steroidogenesis	1	14	0.558705	0.939323	ko04913	LOC105225576(Adcy9)	K08049
Metabolism	Carbohydrate metabolism	Glyoxylate and dicarboxylate metabolism	2	33	0.565989	0.945659	ko00630	LOC105222327(GLO5);LOC105224026(PGP)	K11517+K19269
Human Diseases	Infectious diseases	Hepatitis B	3	52	0.572464	0.950572	ko05161	LOC105222207(Myc);LOC105223305(PCNA);LOC105231838(Stat92E)	K04377+K04802+K11224
Metabolism	Glycan biosynthesis and metabolism	Glycosaminoglycan degradation	1	15	0.58381	0.957208	ko00531	LOC105229216(HEXB)	K12373
Human Diseases	Infectious diseases	Shigellosis	2	35	0.598474	0.957208	ko05131	LOC105225453(Act57B);LOC105229889(Act87E)	K05692+K05692
Human Diseases	Cancers	Colorectal cancer	2	35	0.598474	0.957208	ko05210	LOC105222207(Myc);LOC105227184(Msh6)	K04377+K08737
Organismal Systems	Endocrine system	Estrogen signaling pathway	3	54	0.59853	0.957208	ko04915	LOC105222909(Gnaq);LOC105225576(Adcy9);LOC109579326(Gnaq)	K04634+K08049+K04634
Organismal Systems	Endocrine system	Glucagon signaling pathway	3	54	0.59853	0.957208	ko04922	LOC105222009(GlyP);LOC105222909(Gnaq);LOC109579326(Gnaq)	K00688+K04634+K04634
Human Diseases	Infectious diseases	Human cytomegalovirus infection	4	74	0.612001	0.957208	ko05163	LOC105222207(Myc);LOC105222909(Gnaq);LOC105225576(Adcy9);LOC109579326(Gnaq)	K04377+K04634+K08049+K04634
Organismal Systems	Endocrine system	PPAR signaling pathway	2	36	0.614023	0.957208	ko03320	LOC105225577(Pdk1);LOC105231309(SLC27A4)	K06276+K08745
Human Diseases	Infectious diseases	Salmonella infection	2	36	0.614023	0.957208	ko05132	LOC105225453(Act57B);LOC105229889(Act87E)	K05692+K05692
Environmental Information Processing	Signal transduction	cAMP signaling pathway	4	75	0.622741	0.957208	ko04024	LOC105225576(Adcy9);LOC105230478(Npr1);LOC105233100(Grin2b);LOC109580066(--)	K08049+K12323+K05210+K05210
Organismal Systems	Immune system	Leukocyte transendothelial migration	2	37	0.629111	0.957208	ko04670	LOC105225453(Act57B);LOC105229889(Act87E)	K05692+K05692
Organismal Systems	Nervous system	Long-term depression	2	37	0.629111	0.957208	ko04730	LOC105222909(Gnaq);LOC109579326(Gnaq)	K04634+K04634
Human Diseases	Infectious diseases	Amoebiasis	2	37	0.629111	0.957208	ko05146	LOC105222909(Gnaq);LOC109579326(Gnaq)	K04634+K04634
Genetic Information Processing	Replication and repair	Base excision repair	1	17	0.629836	0.957208	ko03410	LOC105223305(PCNA)	K04802
Environmental Information Processing	Signal transduction	Hippo signaling pathway - multiple species	1	17	0.629836	0.957208	ko04392	LOC105223592(ds)	K16507
Organismal Systems	Digestive system	Cholesterol metabolism	1	17	0.629836	0.957208	ko04979	LOC105223379(Lip1)	K01052
Environmental Information Processing	Signal transduction	Ras signaling pathway	4	77	0.643657	0.960855	ko04014	LOC105224532(PLA2);LOC105232034(--);LOC105233100(Grin2b);LOC109580066(--)	K01047+K01047+K05210+K05210
Organismal Systems	Digestive system	Carbohydrate digestion and absorption	1	18	0.650913	0.960855	ko04973	LOC105221945(Hex-t2)	K00844
Metabolism	Global and overview maps	Carbon metabolism	5	97	0.651914	0.960855	ko01200	LOC105221945(Hex-t2);LOC105222327(GLO5);LOC105222926(Gdh);LOC105224026(PGP);LOC105224810(Idh1)	K00844+K11517+K00261+K19269+K00031
Human Diseases	Infectious diseases	Pathogenic Escherichia coli infection	2	39	0.657909	0.960855	ko05130	LOC105225453(Act57B);LOC105229889(Act87E)	K05692+K05692
Cellular Processes	Cell growth and death	Apoptosis - multiple species	1	19	0.670797	0.960855	ko04215	LOC105225811(CASP7)	K04397
Human Diseases	Endocrine and metabolic diseases	Type II diabetes mellitus	1	19	0.670797	0.960855	ko04930	LOC105221945(Hex-t2)	K00844
Human Diseases	Infectious diseases	Pertussis	1	19	0.670797	0.960855	ko05133	LOC105225811(CASP7)	K04397
Environmental Information Processing	Signal transduction	ErbB signaling pathway	2	40	0.671629	0.960855	ko04012	LOC105222207(Myc);LOC105231838(Stat92E)	K04377+K11224
Cellular Processes	Cellular community - eukaryotes	Tight junction	3	61	0.681345	0.960855	ko04530	LOC105223305(PCNA);LOC105225453(Act57B);LOC105229889(Act87E)	K04802+K05692+K05692
Human Diseases	Endocrine and metabolic diseases	Cushing syndrome	3	61	0.681345	0.960855	ko04934	LOC105222909(Gnaq);LOC105225576(Adcy9);LOC109579326(Gnaq)	K04634+K08049+K04634
Cellular Processes	Cellular community - eukaryotes	Adherens junction	2	41	0.684902	0.960855	ko04520	LOC105225453(Act57B);LOC105229889(Act87E)	K05692+K05692
Metabolism	Carbohydrate metabolism	Pentose phosphate pathway	1	20	0.689553	0.960855	ko00030	LOC105222689(Gld)	K00115
Metabolism	Glycan biosynthesis and metabolism	Other glycan degradation	1	20	0.689553	0.960855	ko00511	LOC105229216(HEXB)	K12373
Metabolism	Carbohydrate metabolism	Propanoate metabolism	1	20	0.689553	0.960855	ko00640	LOC105227092(Acss3)	K01908
Organismal Systems	Digestive system	Protein digestion and absorption	3	62	0.692086	0.960855	ko04974	LOC105228391(TRYP4);LOC105229065(CG1139);LOC105230174(Col1a2)	K01312+K14209+K19719
Organismal Systems	Endocrine system	Insulin signaling pathway	3	63	0.702554	0.960855	ko04910	LOC105221945(Hex-t2);LOC105222009(GlyP);LOC105225577(Pdk1)	K00844+K00688+K06276
Human Diseases	Infectious diseases	HTLV-I infection	5	103	0.703832	0.960855	ko05166	LOC105222207(Myc);LOC105223305(PCNA);LOC105225576(Adcy9);LOC105230724(FDPS);LOC105231838(Stat92E)	K04377+K04802+K08049+K00787+K11224
Genetic Information Processing	Folding, sorting and degradation	SNARE interactions in vesicular transport	1	21	0.707247	0.960855	ko04130	LOC105231913(Syx1A)	K04560
Environmental Information Processing	Signal transduction	Notch signaling pathway	1	21	0.707247	0.960855	ko04330	LOC105221842(fng)	K05948
Organismal Systems	Immune system	Th1 and Th2 cell differentiation	1	21	0.707247	0.960855	ko04658	LOC105231838(Stat92E)	K11224
Human Diseases	Cancers	Basal cell carcinoma	1	21	0.707247	0.960855	ko05217	LOC105225122(dpp)	K04662
Environmental Information Processing	Signal transduction	Sphingolipid signaling pathway	3	65	0.722679	0.964055	ko04071	LOC105222909(Gnaq);LOC105225577(Pdk1);LOC109579326(Gnaq)	K04634+K06276+K04634
Cellular Processes	Cell growth and death	p53 signaling pathway	1	22	0.723937	0.964055	ko04115	LOC105230669(RnrS)	K10808
Organismal Systems	Immune system	Cytosolic DNA-sensing pathway	1	22	0.723937	0.964055	ko04623	LOC105223718(Trex1)	K10790
Organismal Systems	Excretory system	Vasopressin-regulated water reabsorption	1	22	0.723937	0.964055	ko04962	LOC105225576(Adcy9)	K08049
Genetic Information Processing	Translation	Ribosome biogenesis in eukaryotes	3	66	0.732339	0.970439	ko03008	LOC105224702(Nop60B);LOC105224742(RIOK1);LOC105229667(CG7637)	K11131+K07178+K11130
Environmental Information Processing	Signal transduction	MAPK signaling pathway - fly	4	87	0.736549	0.970595	ko04013	LOC105225122(dpp);LOC105232240(bi);LOC105232323(spi);LOC105233319(lz)	K04662+K10176+K20229+K20214
Organismal Systems	Excretory system	Collecting duct acid secretion	1	23	0.73968	0.970595	ko04966	LOC105227818(ATP6V0A1)	K02154
Cellular Processes	Cellular community - eukaryotes	Signaling pathways regulating pluripotency of stem cells	2	46	0.744812	0.970595	ko04550	LOC105222207(Myc);LOC105225122(dpp)	K04377+K04662
Organismal Systems	Immune system	Th17 cell differentiation	1	24	0.75453	0.970595	ko04659	LOC105231838(Stat92E)	K11224
Cellular Processes	Transport and catabolism	Autophagy - animal	4	90	0.76059	0.970595	ko04140	LOC105225577(Pdk1);LOC105226824(Cp1);LOC105232835(Ctla2a);T53i1(TP53INP1)	K06276+K01365+K01365+K21247
Organismal Systems	Immune system	Chemokine signaling pathway	2	48	0.765917	0.970595	ko04062	LOC105225576(Adcy9);LOC105231838(Stat92E)	K08049+K11224
Human Diseases	Infectious diseases	Influenza A	4	91	0.76822	0.970595	ko05164	LOC105225453(Act57B);LOC105228391(TRYP4);LOC105229889(Act87E);LOC105230724(FDPS)	K05692+K01312+K05692+K00787
Metabolism	Carbohydrate metabolism	Fructose and mannose metabolism	1	25	0.768538	0.970595	ko00051	LOC105221945(Hex-t2)	K00844
Environmental Information Processing	Signal transduction	Hedgehog signaling pathway - fly	1	25	0.768538	0.970595	ko04341	LOC105225122(dpp)	K04662
Organismal Systems	Excretory system	Aldosterone-regulated sodium reabsorption	1	25	0.768538	0.970595	ko04960	LOC105225577(Pdk1)	K06276
Cellular Processes	Cell growth and death	Apoptosis - fly	2	49	0.775893	0.973568	ko04214	LOC105225270(Eip74EF);LOC105225811(CASP7)	K09428+K04397
Environmental Information Processing	Signal transduction	TNF signaling pathway	1	26	0.78175	0.973568	ko04668	LOC105225811(CASP7)	K04397
Human Diseases	Infectious diseases	Hepatitis C	1	26	0.78175	0.973568	ko05160	LOC105225577(Pdk1)	K06276
Genetic Information Processing	Replication and repair	Fanconi anemia pathway	1	27	0.794212	0.978791	ko03460	LOC105227371(POLH)	K03509
Human Diseases	Cancers	Transcriptional misregulation in cancers	2	51	0.794741	0.978791	ko05202	LOC105222207(Myc);LOC105224398(prd)	K04377+K09381
Environmental Information Processing	Signal transduction	PI3K-Akt signaling pathway	4	95	0.796859	0.978791	ko04151	LOC105222207(Myc);LOC105222583(thbs3a);LOC105225577(Pdk1);LOC105230174(Col1a2)	K04377+K04659+K06276+K19719
Human Diseases	Cancers	Small cell lung cancer	1	28	0.805966	0.985476	ko05222	LOC105222207(Myc)	K04377
Organismal Systems	Nervous system	Retrograde endocannabinoid signaling	3	76	0.814934	0.990031	ko04723	LOC105222909(Gnaq);LOC105225576(Adcy9);LOC109579326(Gnaq)	K04634+K08049+K04634
Organismal Systems	Immune system	Fc epsilon RI signaling pathway	1	29	0.817052	0.990031	ko04664	LOC105225577(Pdk1)	K06276
Human Diseases	Infectious diseases	Legionellosis	1	31	0.837369	0.999334	ko05134	LOC105225811(CASP7)	K04397
Organismal Systems	Immune system	T cell receptor signaling pathway	1	32	0.846669	0.999334	ko04660	LOC105225577(Pdk1)	K06276
Human Diseases	Neurodegenerative diseases	Alzheimer disease	5	125	0.847248	0.999334	ko05010	LOC105222909(Gnaq);LOC105225811(CASP7);LOC105233100(Grin2b);LOC109579326(Gnaq);LOC109580066(--)	K04634+K04397+K05210+K04634+K05210
Human Diseases	Infectious diseases	Measles	1	33	0.85544	0.999334	ko05162	LOC105231838(Stat92E)	K11224
Human Diseases	Infectious diseases	Tuberculosis	2	61	0.869451	0.999334	ko05152	LOC105223482(Mbl2);LOC105227818(ATP6V0A1)	K06560+K02154
Human Diseases	Drug resistance	Endocrine resistance	1	35	0.871514	0.999334	ko01522	LOC105225576(Adcy9)	K08049
Human Diseases	Infectious diseases	Toxoplasmosis	1	35	0.871514	0.999334	ko05145	LOC105225577(Pdk1)	K06276
Organismal Systems	Circulatory system	Cardiac muscle contraction	1	36	0.87887	0.999334	ko04260	LOC105231331(CACNA2D3)	K04860
Cellular Processes	Cell motility	Regulation of actin cytoskeleton	2	64	0.886457	0.999334	ko04810	LOC105225453(Act57B);LOC105229889(Act87E)	K05692+K05692
Metabolism	Carbohydrate metabolism	Citrate cycle (TCA cycle)	1	38	0.892351	0.999334	ko00020	LOC105224810(Idh1)	K00031
Human Diseases	Endocrine and metabolic diseases	AGE-RAGE signaling pathway in diabetic complications	1	39	0.89852	0.999334	ko04933	LOC105231838(Stat92E)	K11224
Genetic Information Processing	Translation	Aminoacyl-tRNA biosynthesis	1	40	0.904338	0.999334	ko00970	LOC105222249(NARS)	K01893
Genetic Information Processing	Replication and repair	Nucleotide excision repair	1	40	0.904338	0.999334	ko03420	LOC105223305(PCNA)	K04802
Human Diseases	Substance dependence	Morphine addiction	1	40	0.904338	0.999334	ko05032	LOC105225576(Adcy9)	K08049
Human Diseases	Cancers	Breast cancer	1	40	0.904338	0.999334	ko05224	LOC105222207(Myc)	K04377
Metabolism	Carbohydrate metabolism	Inositol phosphate metabolism	1	41	0.909824	0.999334	ko00562	LOC105226135(miox)	K00469
Organismal Systems	Nervous system	GABAergic synapse	1	42	0.914997	0.999334	ko04727	LOC105225576(Adcy9)	K08049
Human Diseases	Cancers	Gastric cancer	1	42	0.914997	0.999334	ko05226	LOC105222207(Myc)	K04377
Organismal Systems	Aging	Longevity regulating pathway - mammal	1	43	0.919874	0.999334	ko04211	LOC105225576(Adcy9)	K08049
Organismal Systems	Nervous system	Neurotrophin signaling pathway	1	46	0.932899	0.999334	ko04722	LOC105225577(Pdk1)	K06276
Metabolism	Nucleotide metabolism	Pyrimidine metabolism	2	78	0.941922	0.999334	ko00240	LOC105230669(RnrS);LOC105232527(DNApol-alpha60)	K10808+K02685
Human Diseases	Infectious diseases	Epithelial cell signaling in Helicobacter pylori infection	1	49	0.943816	0.999334	ko05120	LOC105227818(ATP6V0A1)	K02154
Human Diseases	Infectious diseases	Kaposi sarcoma-associated herpesvirus infection	1	50	0.947047	0.999334	ko05167	LOC105222207(Myc)	K04377
Human Diseases	Infectious diseases	Human papillomavirus infection	4	132	0.948364	0.999334	ko05165	LOC105221842(fng);LOC105222583(thbs3a);LOC105227818(ATP6V0A1);LOC105230174(Col1a2)	K05948+K04659+K02154+K19719
Organismal Systems	Endocrine system	Progesterone-mediated oocyte maturation	1	52	0.952965	0.999334	ko04914	LOC105225576(Adcy9)	K08049
Organismal Systems	Endocrine system	Relaxin signaling pathway	1	54	0.958225	0.999334	ko04926	LOC105225576(Adcy9)	K08049
Environmental Information Processing	Signal transduction	Phosphatidylinositol signaling system	1	57	0.965037	0.999334	ko04070	LOC105225548(rdgA)	K00901
Environmental Information Processing	Signal transduction	AMPK signaling pathway	1	57	0.965037	0.999334	ko04152	LOC105225577(Pdk1)	K06276
Environmental Information Processing	Signal transduction	HIF-1 signaling pathway	1	60	0.970744	0.999334	ko04066	LOC105221945(Hex-t2)	K00844
Organismal Systems	Development	Axon guidance	1	61	0.972432	0.999334	ko04360	LOC109579448(--)	K07525
Environmental Information Processing	Signal transduction	MAPK signaling pathway	2	94	0.973838	0.999334	ko04010	LOC105222207(Myc);LOC105231331(CACNA2D3)	K04377+K04860
Environmental Information Processing	Signal transduction	FoxO signaling pathway	1	62	0.974023	0.999334	ko04068	LOC105225577(Pdk1)	K06276
Human Diseases	Neurodegenerative diseases	Huntington disease	4	149	0.974401	0.999334	ko05016	LOC105222909(Gnaq);LOC105233100(Grin2b);LOC109579326(Gnaq);LOC109580066(--)	K04634+K05210+K04634+K05210
Organismal Systems	Environmental adaptation	Thermogenesis	4	152	0.977469	0.999334	ko04714	LOC105225453(Act57B);LOC105225576(Adcy9);LOC105229889(Act87E);LOC105230478(Npr1)	K05692+K08049+K05692+K12323
Human Diseases	Cancers	MicroRNAs in cancer	1	65	0.978269	0.999334	ko05206	LOC105222207(Myc)	K04377
Cellular Processes	Cell growth and death	Cellular senescence	1	66	0.979525	0.999334	ko04218	LOC105222207(Myc)	K04377
Human Diseases	Neurodegenerative diseases	Parkinson disease	2	102	0.982618	0.999334	ko05012	LOC105227310(DAT);LOC105228430(Slc18a2)	K05036+K08155
Cellular Processes	Cell growth and death	Oocyte meiosis	1	69	0.982876	0.999334	ko04114	LOC105225576(Adcy9)	K08049
Environmental Information Processing	Signal transduction	Wnt signaling pathway	1	75	0.988028	0.999334	ko04310	LOC105222207(Myc)	K04377
Genetic Information Processing	Folding, sorting and degradation	Ubiquitin mediated proteolysis	1	81	0.991636	0.999334	ko04120	LOC105232205(--)	K10456
Genetic Information Processing	Translation	RNA transport	2	117	0.992046	0.999334	ko03013	LOC105224486(--);LOC105229288(EIF4EBP1)	K14292+K18644
Human Diseases	Cancers	Viral carcinogenesis	1	86	0.9938	0.999334	ko05203	LOC105231838(Stat92E)	K11224
Environmental Information Processing	Signal transduction	mTOR signaling pathway	1	96	0.996598	0.999334	ko04150	LOC105225577(Pdk1)	K06276
Human Diseases	Endocrine and metabolic diseases	Non-alcoholic fatty liver disease (NAFLD)	1	98	0.996984	0.999334	ko04932	LOC105225811(CASP7)	K04397
Human Diseases	Infectious diseases	Epstein-Barr virus infection	1	99	0.99716	0.999334	ko05169	LOC105222207(Myc)	K04377
Metabolism	Energy metabolism	Oxidative phosphorylation	1	111	0.998623	0.999334	ko00190	LOC105227818(ATP6V0A1)	K02154
Genetic Information Processing	Translation	Ribosome	1	123	0.999334	0.999334	ko03010	LOC115066478(UBI1)	K02927

## Sheet: Frucose vs Frucose+YH
												KEGG_A_class	KEGG_B_class	Pathway	Frucose-vs-Frucose-YH (145)	All (3266)	Pvalue	Qvalue	Pathway ID	Genes	K_IDs
												Metabolism	Metabolism of terpenoids and polyketides	Insect hormone biosynthesis	10	37	2.71351e-06	0.000678379	ko00981	LOC105223822(SDR-1);LOC105223823(--);LOC105223827(SDR-1);LOC105224512(Aldh1b1);LOC105224923(phm);LOC105224924(Cyp18a1);LOC105225180(pho2);LOC105227882(SDR-1);LOC105230714(EH2);LOC109580008(--)	K15890+K15890+K15890+K00128+K10720+K14985+K21013+K15890+K10719+K21013
												Organismal Systems	Sensory system	Phototransduction - fly	9	37	2.24338e-05	0.00280423	ko04745	LOC105221897(trp);LOC105223942(Arr2);LOC105225234(Gbeta76C);LOC105225379(inaD);LOC105227342(rdgC);LOC105228222(Act79B);LOC105233243(trpl);LOC105233410(inaC);Rh1(ninaE)	K04967+K13805+K07972+K13804+K13807+K05692+K13803+K02677+K13802
												Metabolism	Lipid metabolism	Cutin, suberine and wax biosynthesis	5	10	3.39034e-05	0.00282528	ko00073	LOC105222769(wat);LOC105225825(wat);LOC105226693(far1);LOC105228879(FAR1);LOC105230858(far1)	K13356+K13356+K13356+K13356+K13356
												Metabolism	Amino acid metabolism	Glycine, serine and threonine metabolism	7	27	0.000123612	0.00772575	ko00260	LOC105225803(gpmA);LOC105226309(daao-1);LOC105226796(THA2);LOC105227212(AGXT2);LOC105228945(Sardh);LOC105232622(Aldh7a1);MSTRG.7038(AGXT)	K01834+K00273+K01620+K00827+K00314+K14085+K00830
												Metabolism	Amino acid metabolism	Tyrosine metabolism	6	21	0.000215539	0.010777	ko00350	LOC105224730(Hpd);LOC105224873(FAH);LOC105225839(GstZ2);LOC105230711(Tat);LOC105233819(hgo);LOC105234241(amd)	K00457+K01555+K01800+K00815+K00451+K01618
												Metabolism	Amino acid metabolism	Arginine and proline metabolism	7	37	0.000986163	0.0410901	ko00330	LOC105224512(Aldh1b1);LOC105225237(Oat);LOC105226309(daao-1);LOC105231755(P4HA2);LOC105231756(P4HA1);LOC105232622(Aldh7a1);LOC105232635(Argk)	K00128+K00819+K00273+K00472+K00472+K14085+K00933
												Metabolism	Global and overview maps	Metabolic pathways	56	882	0.00121064	0.0432372	ko01100	LOC105222327(GLO5);LOC105222926(Gdh);LOC105222986(CHIA);LOC105223108(HMT-1);LOC105224026(PGP);LOC105224512(Aldh1b1);LOC105224532(PLA2);LOC105224618(Pfk);LOC105224730(Hpd);LOC105224873(FAH);LOC105224947(Cryl1);LOC105225237(Oat);LOC105225353(AANAT1);LOC105225673(C1GalTA);LOC105225803(gpmA);LOC105225839(GstZ2);LOC105226309(daao-1);LOC105226349(stp1);LOC105226450(eloF);LOC105226796(THA2);LOC105227008…	K11517+K00261+K01183+K00547+K19269+K00128+K01047+K00850+K00457+K01555+K13247+K00819+K00669+K00731+K01834+K01800+K00273+K14394+K10249+K01620+K01077+K00827+K00728+K07127+K00772+K02154+K01080+K03783+K00314+K12373+K01594+K00699+K01590+K14677+K00699+K00901+K00815+K00787+K00789+K11140+K00106+K00472+K00472+K01047+K01596+K01183+K14085+K00933+K01435+K19572+K00757+K00451+K01183+K00699+K01183+K00830
												Organismal Systems	Endocrine system	Renin-angiotensin system	4	13	0.00194783	0.0568019	ko04614	LOC105229185(--);LOC105230937(Anpep);LOC105232277(Ance);LOC105233746(ANPEP)	K01283+K11140+K01283+K11141
												Cellular Processes	Transport and catabolism	Peroxisome	10	78	0.00204487	0.0568019	ko04146	LOC105222327(GLO5);LOC105222769(wat);LOC105225825(wat);LOC105226309(daao-1);LOC105226693(far1);LOC105228879(FAR1);LOC105229660(daao-1);LOC105230858(far1);LOC105230951(XDH);MSTRG.7038(AGXT)	K11517+K13356+K13356+K00273+K13356+K13356+K00272+K13356+K00106+K00830
												Metabolism	Carbohydrate metabolism	Ascorbate and aldarate metabolism	6	32	0.00240165	0.0597812	ko00053	LOC105224512(Aldh1b1);LOC105226135(miox);LOC105229550(UGT2A1);LOC105230325(ugt3);LOC105232622(Aldh7a1);LOC115065792(UGT2B13)	K00128+K00469+K00699+K00699+K14085+K00699
												Metabolism	Amino acid metabolism	Histidine metabolism	3	7	0.00263037	0.0597812	ko00340	LOC105224512(Aldh1b1);LOC105229708(Hdc);LOC105232622(Aldh7a1)	K00128+K01590+K14085
												Metabolism	Metabolism of terpenoids and polyketides	Terpenoid backbone biosynthesis	5	32	0.0122913	0.25607	ko00900	LOC105223822(SDR-1);LOC105223823(--);LOC105223827(SDR-1);LOC105227882(SDR-1);LOC105230724(FDPS)	K15890+K15890+K15890+K15890+K00787
												Metabolism	Amino acid metabolism	Cysteine and methionine metabolism	5	33	0.0139809	0.268864	ko00270	LOC105223108(HMT-1);LOC105227212(AGXT2);LOC105227713(Mtap);LOC105230711(Tat);LOC105230754(Sam-S)	K00547+K00827+K00772+K00815+K00789
												Metabolism	Carbohydrate metabolism	Amino sugar and nucleotide sugar metabolism	6	48	0.0181609	0.324302	ko00520	LOC105222986(CHIA);LOC105226562(chs-2);LOC105229216(HEXB);LOC105232357(Cht10);LOC109579331(--);LOC115065892(--)	K01183+K00698+K12373+K01183+K01183+K01183
												Metabolism	Amino acid metabolism	Alanine, aspartate and glutamate metabolism	4	25	0.0227796	0.362555	ko00250	LOC105222926(Gdh);LOC105227212(AGXT2);LOC105229660(daao-1);MSTRG.7038(AGXT)	K00261+K00827+K00272+K00830
												Organismal Systems	Digestive system	Fat digestion and absorption	4	26	0.0260173	0.362555	ko04975	LOC105224532(PLA2);LOC105227848(PLPP1);LOC105231309(SLC27A4);LOC105232034(--)	K01047+K01080+K08745+K01047
												Metabolism	Amino acid metabolism	Phenylalanine metabolism	2	6	0.026104	0.362555	ko00360	LOC105224730(Hpd);LOC105230711(Tat)	K00457+K00815
												Metabolism	Lipid metabolism	Linoleic acid metabolism	2	6	0.026104	0.362555	ko00591	LOC105224532(PLA2);LOC105232034(--)	K01047+K01047
												Environmental Information Processing	Signal transduction	MAPK signaling pathway - fly	8	87	0.0374439	0.485382	ko04013	LOC105225122(dpp);LOC105226487(aos);LOC105228744(aop);LOC105229783(RREB1);LOC105232239(bi);LOC105232240(bi);LOC105232323(spi);LOC115066544(pnt)	K04662+K02104+K03211+K20210+K10176+K10176+K20229+K02678
												Metabolism	Global and overview maps	Biosynthesis of amino acids	6	57	0.0388306	0.485382	ko01230	LOC105224618(Pfk);LOC105225803(gpmA);LOC105226796(THA2);LOC105229765(Acy1b);LOC105230711(Tat);LOC105230754(Sam-S)	K00850+K01834+K01620+K14677+K00815+K00789
												Organismal Systems	Immune system	Antigen processing and presentation	3	18	0.04287	0.504509	ko04612	LOC105226824(Cp1);LOC105231830(Hsc70-2);LOC105232835(Ctla2a)	K01365+K03283+K01365
												Metabolism	Metabolism of other amino acids	D-Arginine and D-ornithine metabolism	1	1	0.0443968	0.504509	ko00472	LOC105226309(daao-1)	K00273
												Metabolism	Amino acid metabolism	Tryptophan metabolism	3	19	0.0492999	0.50742	ko00380	LOC105224512(Aldh1b1);LOC105225353(AANAT1);LOC105232622(Aldh7a1)	K00128+K00669+K14085
												Organismal Systems	Aging	Longevity regulating pathway - multiple species	5	46	0.0510862	0.50742	ko04213	LOC105222463(Hsp23);LOC105228868(Ilp7);LOC105229288(EIF4EBP1);LOC105230971(InR);LOC105231830(Hsc70-2)	K09542+K19805+K18644+K05087+K03283
												Organismal Systems	Aging	Longevity regulating pathway - worm	7	77	0.0527717	0.50742	ko04212	LOC105222769(wat);LOC105225825(wat);LOC105226693(far1);LOC105228298(GSTT1);LOC105228879(FAR1);LOC105229681(GST1);LOC105230858(far1)	K13356+K13356+K13356+K00799+K13356+K00799+K13356
												Human Diseases	Cardiovascular diseases	Fluid shear stress and atherosclerosis	7	77	0.0527717	0.50742	ko05418	LOC105225122(dpp);LOC105226824(Cp1);LOC105228222(Act79B);LOC105228298(GSTT1);LOC105229681(GST1);LOC105232205(--);LOC105232835(Ctla2a)	K04662+K01365+K05692+K00799+K00799+K10456+K01365
												Human Diseases	Substance dependence	Cocaine addiction	3	20	0.056172	0.520111	ko05030	LOC105227310(DAT);LOC105228430(Slc18a2);LOC105233100(Grin2b)	K05036+K08155+K05210
												Metabolism	Metabolism of cofactors and vitamins	Ubiquinone and other terpenoid-quinone biosynthesis	2	10	0.0697214	0.612976	ko00130	LOC105224730(Hpd);LOC105230711(Tat)	K00457+K00815
												Metabolism	Lipid metabolism	Ether lipid metabolism	3	22	0.0711908	0.612976	ko00565	LOC105224532(PLA2);LOC105227848(PLPP1);LOC105232034(--)	K01047+K01080+K01047
												Metabolism	Carbohydrate metabolism	Glycolysis / Gluconeogenesis	5	51	0.0735571	0.612976	ko00010	LOC105224512(Aldh1b1);LOC105224618(Pfk);LOC105225803(gpmA);LOC105232191(Pepck);LOC105232622(Aldh7a1)	K00128+K00850+K01834+K01596+K14085
												Metabolism	Xenobiotics biodegradation and metabolism	Drug metabolism - other enzymes	7	84	0.0771356	0.617972	ko00983	LOC105228298(GSTT1);LOC105229550(UGT2A1);LOC105229681(GST1);LOC105230325(ugt3);LOC105230951(XDH);LOC105233253(Upp1);LOC115065792(UGT2B13)	K00799+K00699+K00799+K00699+K00106+K00757+K00699
												Organismal Systems	Endocrine system	Thyroid hormone signaling pathway	6	68	0.0791004	0.617972	ko04919	LOC105222207(Myc);LOC105224618(Pfk);LOC105225122(dpp);LOC105225577(Pdk1);LOC105228222(Act79B);LOC105233410(inaC)	K04377+K00850+K04662+K06276+K05692+K02677
												Human Diseases	Substance dependence	Amphetamine addiction	4	38	0.0856386	0.638497	ko05031	LOC105227310(DAT);LOC105228430(Slc18a2);LOC105233100(Grin2b);LOC105233410(inaC)	K05036+K08155+K05210+K02677
												Metabolism	Metabolism of other amino acids	D-Glutamine and D-glutamate metabolism	1	2	0.0868355	0.638497	ko00471	LOC105222926(Gdh)	K00261
												Cellular Processes	Transport and catabolism	Lysosome	8	105	0.092271	0.652371	ko04142	LOC105223550(Dnase2);LOC105223565(--);LOC105224023(CLN3);LOC105226824(Cp1);LOC105227818(ATP6V0A1);LOC105227880(mfsd8);LOC105229216(HEXB);LOC105232835(Ctla2a)	K01158+K12383+K12389+K01365+K02154+K12307+K12373+K01365
												Metabolism	Lipid metabolism	Glycerophospholipid metabolism	5	55	0.0948487	0.652371	ko00564	LOC105224532(PLA2);LOC105227848(PLPP1);LOC105229768(ACHE1);LOC105230334(CG34384);LOC105232034(--)	K01047+K01080+K01049+K00901+K01047
												Metabolism	Glycan biosynthesis and metabolism	Other types of O-glycan biosynthesis	2	12	0.0965509	0.652371	ko00514	LOC105221842(fng);LOC105227401(rt)	K05948+K00728
												Cellular Processes	Transport and catabolism	Phagosome	6	73	0.103077	0.660086	ko04145	LOC105222583(thbs3a);LOC105223482(Mbl2);LOC105226824(Cp1);LOC105227818(ATP6V0A1);LOC105228222(Act79B);LOC105232835(Ctla2a)	K04659+K06560+K01365+K02154+K05692+K01365
												Metabolism	Xenobiotics biodegradation and metabolism	Drug metabolism - cytochrome P450	5	57	0.106558	0.660086	ko00982	LOC105228298(GSTT1);LOC105229550(UGT2A1);LOC105229681(GST1);LOC105230325(ugt3);LOC115065792(UGT2B13)	K00799+K00699+K00799+K00699+K00699
												Human Diseases	Cancers	Chemical carcinogenesis	5	57	0.106558	0.660086	ko05204	LOC105228298(GSTT1);LOC105229550(UGT2A1);LOC105229681(GST1);LOC105230325(ugt3);LOC115065792(UGT2B13)	K00799+K00699+K00799+K00699+K00699
												Metabolism	Lipid metabolism	alpha-Linolenic acid metabolism	2	13	0.110894	0.660086	ko00592	LOC105224532(PLA2);LOC105232034(--)	K01047+K01047
												Organismal Systems	Excretory system	Proximal tubule bicarbonate reclamation	2	13	0.110894	0.660086	ko04964	LOC105222926(Gdh);LOC105232191(Pepck)	K00261+K01596
												Metabolism	Lipid metabolism	Glycerolipid metabolism	4	43	0.121229	0.660155	ko00561	LOC105224512(Aldh1b1);LOC105227848(PLPP1);LOC105230334(CG34384);LOC105232622(Aldh7a1)	K00128+K01080+K00901+K14085
												Environmental Information Processing	Signal transduction	Ras signaling pathway	6	77	0.124711	0.660155	ko04014	LOC105224532(PLA2);LOC105230971(InR);LOC105232034(--);LOC105233100(Grin2b);LOC105233410(inaC);LOC115066544(pnt)	K01047+K05087+K01047+K05210+K02677+K02678
												Metabolism	Lipid metabolism	Steroid hormone biosynthesis	3	28	0.125299	0.660155	ko00140	LOC105229550(UGT2A1);LOC105230325(ugt3);LOC115065792(UGT2B13)	K00699+K00699+K00699
												Metabolism	Xenobiotics biodegradation and metabolism	Metabolism of xenobiotics by cytochrome P450	5	60	0.125385	0.660155	ko00980	LOC105228298(GSTT1);LOC105229550(UGT2A1);LOC105229681(GST1);LOC105230325(ugt3);LOC115065792(UGT2B13)	K00799+K00699+K00799+K00699+K00699
												Metabolism	Lipid metabolism	Arachidonic acid metabolism	2	14	0.12575	0.660155	ko00590	LOC105224532(PLA2);LOC105232034(--)	K01047+K01047
												Human Diseases	Cancers	Hepatocellular carcinoma	7	95	0.12675	0.660155	ko05225	LOC105222207(Myc);LOC105228222(Act79B);LOC105228298(GSTT1);LOC105229681(GST1);LOC105230971(InR);LOC105232205(--);LOC105233410(inaC)	K04377+K05692+K00799+K00799+K05087+K10456+K02677
												Metabolism	Amino acid metabolism	Arginine biosynthesis	2	15	0.141045	0.707736	ko00220	LOC105222926(Gdh);LOC105229765(Acy1b)	K00261+K14677
												Human Diseases	Cancers	Prostate cancer	5	63	0.145638	0.707736	ko05215	LOC105225577(Pdk1);LOC105226759(zfh1);LOC105228298(GSTT1);LOC105229681(GST1);LOC105230971(InR)	K06276+K09299+K00799+K00799+K05087
												Human Diseases	Cardiovascular diseases	Hypertrophic cardiomyopathy (HCM)	3	30	0.145875	0.707736	ko05410	LOC105228222(Act79B);LOC105229185(--);LOC105232277(Ance)	K05692+K01283+K01283
												Human Diseases	Cancers	Proteoglycans in cancer	7	99	0.148056	0.707736	ko05205	LOC105222207(Myc);LOC105225577(Pdk1);LOC105226824(Cp1);LOC105228222(Act79B);LOC105230971(InR);LOC105232835(Ctla2a);LOC105233410(inaC)	K04377+K06276+K01365+K05692+K05087+K01365+K02677
												Human Diseases	Immune diseases	Rheumatoid arthritis	3	31	0.156555	0.707736	ko05323	LOC105226824(Cp1);LOC105227818(ATP6V0A1);LOC105232835(Ctla2a)	K01365+K02154+K01365
												Human Diseases	Drug resistance	Platinum drug resistance	4	48	0.162097	0.707736	ko01524	LOC105225577(Pdk1);LOC105228298(GSTT1);LOC105229681(GST1);LOC105231062(--)	K06276+K00799+K00799+K14686
												Metabolism	Amino acid metabolism	Phenylalanine, tyrosine and tryptophan biosynthesis	1	4	0.166178	0.707736	ko00400	LOC105230711(Tat)	K00815
												Metabolism	Glycan biosynthesis and metabolism	Mannose type O-glycan biosyntheis	1	4	0.166178	0.707736	ko00515	LOC105227401(rt)	K00728
												Metabolism	Metabolism of cofactors and vitamins	Biotin metabolism	1	4	0.166178	0.707736	ko00780	LOC105232645(vanin-like)	K01435
												Organismal Systems	Development	Dorso-ventral axis formation	3	32	0.167469	0.707736	ko04320	LOC105226487(aos);LOC105228744(aop);LOC115066544(pnt)	K02104+K03211+K02678
												Metabolism	Carbohydrate metabolism	Pentose and glucuronate interconversions	4	49	0.170816	0.707736	ko00040	LOC105224947(Cryl1);LOC105229550(UGT2A1);LOC105230325(ugt3);LOC115065792(UGT2B13)	K13247+K00699+K00699+K00699
												Metabolism	Metabolism of other amino acids	beta-Alanine metabolism	2	17	0.172688	0.707736	ko00410	LOC105224512(Aldh1b1);LOC105232622(Aldh7a1)	K00128+K14085
												Organismal Systems	Digestive system	Vitamin digestion and absorption	2	17	0.172688	0.707736	ko04977	LOC105227011(Slc23a2);LOC105232645(vanin-like)	K14611+K01435
												Metabolism	Amino acid metabolism	Valine, leucine and isoleucine degradation	3	33	0.178601	0.708693	ko00280	LOC105224512(Aldh1b1);LOC105227212(AGXT2);LOC105232622(Aldh7a1)	K00128+K00827+K14085
												Metabolism	Carbohydrate metabolism	Glyoxylate and dicarboxylate metabolism	3	33	0.178601	0.708693	ko00630	LOC105222327(GLO5);LOC105224026(PGP);MSTRG.7038(AGXT)	K11517+K19269+K00830
												Environmental Information Processing	Signaling molecules and interaction	Neuroactive ligand-receptor interaction	5	68	0.182245	0.708693	ko04080	LOC105222913(TkR99D);LOC105225174(Prss1);LOC105228391(TRYP4);LOC105230493(Rxfp2);LOC105233100(Grin2b)	K04224+K01312+K01312+K04307+K05210
												Human Diseases	Cancers	Transcriptional misregulation in cancers	4	51	0.18873	0.708693	ko05202	LOC105222207(Myc);LOC105226759(zfh1);LOC105228744(aop);LOC105230971(InR)	K04377+K09299+K03211+K05087
												Metabolism	Metabolism of cofactors and vitamins	Retinol metabolism	3	34	0.18993	0.708693	ko00830	LOC105229550(UGT2A1);LOC105230325(ugt3);LOC115065792(UGT2B13)	K00699+K00699+K00699
												Human Diseases	Cancers	Central carbon metabolism in cancer	3	34	0.18993	0.708693	ko05230	LOC105222207(Myc);LOC105224618(Pfk);LOC105225803(gpmA)	K04377+K00850+K01834
												Metabolism	Metabolism of cofactors and vitamins	Thiamine metabolism	2	19	0.20534	0.754927	ko00730	LOC105226349(stp1);LOC105227008(Alp4)	K14394+K01077
												Organismal Systems	Endocrine system	PPAR signaling pathway	3	36	0.213107	0.769185	ko03320	LOC105225577(Pdk1);LOC105231309(SLC27A4);LOC105232191(Pepck)	K06276+K08745+K01596
												Human Diseases	Infectious diseases	Influenza A	6	91	0.215372	0.769185	ko05164	LOC105225174(Prss1);LOC105228222(Act79B);LOC105228391(TRYP4);LOC105230724(FDPS);LOC105231830(Hsc70-2);LOC105233410(inaC)	K01312+K05692+K01312+K00787+K03283+K02677
												Environmental Information Processing	Signal transduction	Hippo signaling pathway -fly	4	56	0.235869	0.7851	ko04391	LOC105222207(Myc);LOC105223592(ds);LOC105228222(Act79B);LOC105228494(VIII-A)	K04377+K16507+K05692+K16677
												Human Diseases	Cancers	Choline metabolism in cancer	4	56	0.235869	0.7851	ko05231	LOC105225577(Pdk1);LOC105227848(PLPP1);LOC105230334(CG34384);LOC105233410(inaC)	K06276+K01080+K00901+K02677
												Cellular Processes	Cellular community - eukaryotes	Focal adhesion	5	75	0.23843	0.7851	ko04510	LOC105222583(thbs3a);LOC105225577(Pdk1);LOC105228222(Act79B);LOC105230971(InR);LOC105233410(inaC)	K04659+K06276+K05692+K05087+K02677
												Metabolism	Biosynthesis of other secondary metabolites	Caffeine metabolism	1	6	0.23867	0.7851	ko00232	LOC105230951(XDH)	K00106
												Metabolism	Glycan biosynthesis and metabolism	Glycosphingolipid biosynthesis - globo and isoglobo series	1	6	0.23867	0.7851	ko00603	LOC105229216(HEXB)	K12373
												Human Diseases	Infectious diseases	Malaria	1	6	0.23867	0.7851	ko05144	LOC105222583(thbs3a)	K04659
												Environmental Information Processing	Signal transduction	PI3K-Akt signaling pathway	6	95	0.244722	0.787271	ko04151	LOC105222207(Myc);LOC105222583(thbs3a);LOC105225577(Pdk1);LOC105230971(InR);LOC105232191(Pepck);LOC105233410(inaC)	K04377+K04659+K06276+K05087+K01596+K02677
												Environmental Information Processing	Signal transduction	AMPK signaling pathway	4	57	0.245629	0.787271	ko04152	LOC105224618(Pfk);LOC105225577(Pdk1);LOC105230971(InR);LOC105232191(Pepck)	K00850+K06276+K05087+K01596
												Metabolism	Carbohydrate metabolism	Pyruvate metabolism	3	39	0.248906	0.787676	ko00620	LOC105224512(Aldh1b1);LOC105232191(Pepck);LOC105232622(Aldh7a1)	K00128+K01596+K14085
												Cellular Processes	Cell growth and death	Apoptosis	4	58	0.255478	0.798368	ko04210	LOC105225577(Pdk1);LOC105226824(Cp1);LOC105228222(Act79B);LOC105232835(Ctla2a)	K06276+K01365+K05692+K01365
												Metabolism	Global and overview maps	Carbon metabolism	6	97	0.259827	0.801936	ko01200	LOC105222327(GLO5);LOC105222926(Gdh);LOC105224026(PGP);LOC105224618(Pfk);LOC105225803(gpmA);MSTRG.7038(AGXT)	K11517+K00261+K19269+K00850+K01834+K00830
												Metabolism	Glycan biosynthesis and metabolism	Glycosphingolipid biosynthesis - ganglio series	1	7	0.272533	0.813279	ko00604	LOC105229216(HEXB)	K12373
												Metabolism	Metabolism of cofactors and vitamins	Riboflavin metabolism	1	7	0.272533	0.813279	ko00740	LOC105226349(stp1)	K14394
												Cellular Processes	Cellular community - eukaryotes	Adherens junction	3	41	0.273262	0.813279	ko04520	LOC105226349(stp1);LOC105228222(Act79B);LOC105230971(InR)	K14394+K05692+K05087
												Organismal Systems	Immune system	Toll and Imd signaling pathway	5	80	0.281166	0.826959	ko04624	LOC105228508(modSP);LOC105229698(DEFC);LOC105229884(snk);LOC105232011(GNBP3);LOC115066711(--)	K20674+K20668+K20675+K20692+K20694
												Organismal Systems	Nervous system	Dopaminergic synapse	4	61	0.285474	0.829866	ko04728	LOC105227310(DAT);LOC105228430(Slc18a2);LOC105233100(Grin2b);LOC105233410(inaC)	K05036+K08155+K05210+K02677
												Human Diseases	Cancers	Endometrial cancer	2	24	0.28885	0.83003	ko05213	LOC105222207(Myc);LOC105225577(Pdk1)	K04377+K06276
												Organismal Systems	Digestive system	Protein digestion and absorption	4	62	0.295594	0.839007	ko04974	LOC105223014(yin);LOC105225174(Prss1);LOC105228391(TRYP4);MSTRG.4773(--)	K14206+K01312+K01312+K14209
												Organismal Systems	Digestive system	Pancreatic secretion	5	82	0.298686	0.839007	ko04972	LOC105224532(PLA2);LOC105225174(Prss1);LOC105228391(TRYP4);LOC105232034(--);LOC105233410(inaC)	K01047+K01312+K01312+K01047+K02677
												Human Diseases	Immune diseases	Systemic lupus erythematosus	1	8	0.3049	0.839453	ko05322	LOC105233100(Grin2b)	K05210
												Organismal Systems	Excretory system	Aldosterone-regulated sodium reabsorption	2	25	0.305561	0.839453	ko04960	LOC105225577(Pdk1);LOC105233410(inaC)	K06276+K02677
												Metabolism	Metabolism of cofactors and vitamins	Porphyrin and chlorophyll metabolism	3	44	0.310217	0.839589	ko00860	LOC105229550(UGT2A1);LOC105230325(ugt3);LOC115065792(UGT2B13)	K00699+K00699+K00699
												Human Diseases	Cancers	MicroRNAs in cancer	4	65	0.3262	0.839589	ko05206	LOC105222207(Myc);LOC105226759(zfh1);LOC105232101(igf2bp1);LOC105233410(inaC)	K04377+K09299+K17391+K02677
												Cellular Processes	Cellular community - eukaryotes	Signaling pathways regulating pluripotency of stem cells	3	46	0.334967	0.839589	ko04550	LOC105222207(Myc);LOC105225122(dpp);LOC105230971(InR)	K04377+K04662+K05087
												Human Diseases	Substance dependence	Alcoholism	3	46	0.334967	0.839589	ko05034	LOC105227310(DAT);LOC105228430(Slc18a2);LOC105233100(Grin2b)	K05036+K08155+K05210
												Metabolism	Metabolism of other amino acids	Taurine and hypotaurine metabolism	1	9	0.335836	0.839589	ko00430	LOC105229437(Csad)	K01594
												Environmental Information Processing	Signaling molecules and interaction	Cytokine-cytokine receptor interaction	1	9	0.335836	0.839589	ko04060	LOC105225122(dpp)	K04662
												Organismal Systems	Immune system	Hematopoietic cell lineage	1	9	0.335836	0.839589	ko04640	LOC105230937(Anpep)	K11140
												Human Diseases	Substance dependence	Nicotine addiction	1	9	0.335836	0.839589	ko05033	LOC105233100(Grin2b)	K05210
												Human Diseases	Cancers	Bladder cancer	1	9	0.335836	0.839589	ko05219	LOC105222207(Myc)	K04377
												Organismal Systems	Digestive system	Bile secretion	3	47	0.347337	0.859745	ko04976	LOC105229550(UGT2A1);LOC105230325(ugt3);LOC115065792(UGT2B13)	K00699+K00699+K00699
												Metabolism	Metabolism of cofactors and vitamins	One carbon pool by folate	1	10	0.365404	0.885723	ko00670	LOC105223295(aldh1l1)	K00289
												Cellular Processes	Transport and catabolism	Autophagy - animal	5	90	0.370124	0.885723	ko04140	LOC105225577(Pdk1);LOC105225893(atg101);LOC105226824(Cp1);LOC105230971(InR);LOC105232835(Ctla2a)	K06276+K19730+K01365+K05087+K01365
												Organismal Systems	Immune system	Fc epsilon RI signaling pathway	2	29	0.371434	0.885723	ko04664	LOC105225577(Pdk1);LOC105233410(inaC)	K06276+K02677
												Human Diseases	Endocrine and metabolic diseases	Insulin resistance	3	49	0.372004	0.885723	ko04931	LOC105225577(Pdk1);LOC105231309(SLC27A4);LOC105232191(Pepck)	K06276+K08745+K01596
												Environmental Information Processing	Signal transduction	Rap1 signaling pathway	4	70	0.377566	0.890485	ko04015	LOC105228222(Act79B);LOC105230971(InR);LOC105233100(Grin2b);LOC105233410(inaC)	K05692+K05087+K05210+K02677
												Human Diseases	Cancers	Non-small cell lung cancer	2	30	0.387546	0.90548	ko05223	LOC105225577(Pdk1);LOC105233410(inaC)	K06276+K02677
												Environmental Information Processing	Signal transduction	TGF-beta signaling pathway	2	31	0.403476	0.925404	ko04350	LOC105222207(Myc);LOC105225122(dpp)	K04377+K04662
												Human Diseases	Cancers	Glioma	2	31	0.403476	0.925404	ko05214	LOC105230971(InR);LOC105233410(inaC)	K05087+K02677
												Organismal Systems	Endocrine system	Renin secretion	2	32	0.41921	0.947466	ko04924	LOC105229185(--);LOC105232277(Ance)	K01283+K01283
												Human Diseases	Cancers	Thyroid cancer	1	12	0.420675	0.947466	ko05216	LOC105222207(Myc)	K04377
												Organismal Systems	Endocrine system	Glucagon signaling pathway	3	54	0.432751	0.957414	ko04922	LOC105224618(Pfk);LOC105225803(gpmA);LOC105232191(Pepck)	K00850+K01834+K01596
												Human Diseases	Infectious diseases	Vibrio cholerae infection	3	54	0.432751	0.957414	ko05110	LOC105227818(ATP6V0A1);LOC105228222(Act79B);LOC105233410(inaC)	K02154+K05692+K02677
												Metabolism	Metabolism of cofactors and vitamins	Nicotinate and nicotinamide metabolism	1	13	0.44649	0.969899	ko00760	LOC105227970(PNP)	K03783
												Human Diseases	Cancers	Melanoma	1	13	0.44649	0.969899	ko05218	LOC105230971(InR)	K05087
												Human Diseases	Drug resistance	EGFR tyrosine kinase inhibitor resistance	2	34	0.450033	0.969899	ko01521	LOC105230971(InR);LOC105233410(inaC)	K05087+K02677
												Genetic Information Processing	Replication and repair	DNA replication	2	35	0.465099	0.969978	ko03030	LOC105226613(Mcm2);LOC105229089(Mcm7)	K02540+K02210
												Human Diseases	Infectious diseases	Toxoplasmosis	2	35	0.465099	0.969978	ko05145	LOC105225577(Pdk1);LOC105231830(Hsc70-2)	K06276+K03283
												Organismal Systems	Endocrine system	Ovarian Steroidogenesis	1	14	0.471162	0.969978	ko04913	LOC105230971(InR)	K05087
												Metabolism	Lipid metabolism	Fatty acid degradation	2	36	0.479923	0.969978	ko00071	LOC105224512(Aldh1b1);LOC105232622(Aldh7a1)	K00128+K14085
												Metabolism	Metabolism of other amino acids	Glutathione metabolism	3	59	0.491289	0.969978	ko00480	LOC105228298(GSTT1);LOC105229681(GST1);LOC105230937(Anpep)	K00799+K00799+K11140
												Organismal Systems	Circulatory system	Vascular smooth muscle contraction	3	59	0.491289	0.969978	ko04270	LOC105224532(PLA2);LOC105232034(--);LOC105233410(inaC)	K01047+K01047+K02677
												Organismal Systems	Immune system	Leukocyte transendothelial migration	2	37	0.494494	0.969978	ko04670	LOC105228222(Act79B);LOC105233410(inaC)	K05692+K02677
												Organismal Systems	Nervous system	Long-term depression	2	37	0.494494	0.969978	ko04730	LOC105230971(InR);LOC105233410(inaC)	K05087+K02677
												Metabolism	Glycan biosynthesis and metabolism	Glycosaminoglycan degradation	1	15	0.494742	0.969978	ko00531	LOC105229216(HEXB)	K12373
												Environmental Information Processing	Signal transduction	HIF-1 signaling pathway	3	60	0.502651	0.969978	ko04066	LOC105224618(Pfk);LOC105230971(InR);LOC105233410(inaC)	K00850+K05087+K02677
												Metabolism	Lipid metabolism	Fatty acid elongation	1	16	0.517277	0.969978	ko00062	LOC105226450(eloF)	K10249
												Metabolism	Energy metabolism	Nitrogen metabolism	1	16	0.517277	0.969978	ko00910	LOC105222926(Gdh)	K00261
												Metabolism	Global and overview maps	2-Oxocarboxylic acid metabolism	1	16	0.517277	0.969978	ko01210	LOC105229765(Acy1b)	K14677
												Environmental Information Processing	Signaling molecules and interaction	ECM-receptor interaction	1	16	0.517277	0.969978	ko04512	LOC105222583(thbs3a)	K04659
												Human Diseases	Infectious diseases	Pathogenic Escherichia coli infection	2	39	0.522856	0.969978	ko05130	LOC105228222(Act79B);LOC105233410(inaC)	K05692+K02677
												Environmental Information Processing	Signal transduction	FoxO signaling pathway	3	62	0.524983	0.969978	ko04068	LOC105225577(Pdk1);LOC105230971(InR);LOC105232191(Pepck)	K06276+K05087+K01596
												Environmental Information Processing	Signal transduction	ErbB signaling pathway	2	40	0.536636	0.969978	ko04012	LOC105222207(Myc);LOC105233410(inaC)	K04377+K02677
												Human Diseases	Cancers	Breast cancer	2	40	0.536636	0.969978	ko05224	LOC105222207(Myc);LOC105230971(InR)	K04377+K05087
												Environmental Information Processing	Signal transduction	Hippo signaling pathway - multiple species	1	17	0.538814	0.969978	ko04392	LOC105223592(ds)	K16507
												Human Diseases	Neurodegenerative diseases	Prion diseases	1	17	0.538814	0.969978	ko05020	LOC105231830(Hsc70-2)	K03283
												Environmental Information Processing	Signal transduction	Phospholipase D signaling pathway	3	64	0.546763	0.969978	ko04072	LOC105227848(PLPP1);LOC105230334(CG34384);LOC105233410(inaC)	K01080+K00901+K02677
												Metabolism	Amino acid metabolism	Lysine degradation	2	41	0.550142	0.969978	ko00310	LOC105224512(Aldh1b1);LOC105232622(Aldh7a1)	K00128+K14085
												Organismal Systems	Digestive system	Gastric acid secretion	2	41	0.550142	0.969978	ko04971	LOC105228222(Act79B);LOC105233410(inaC)	K05692+K02677
												Human Diseases	Infectious diseases	African trypanosomiasis	1	18	0.559396	0.969978	ko05143	LOC105233410(inaC)	K02677
												Human Diseases	Cardiovascular diseases	Arrhythmogenic right ventricular cardiomyopathy (ARVC)	1	18	0.559396	0.969978	ko05412	LOC105228222(Act79B)	K05692
												Human Diseases	Cardiovascular diseases	Viral myocarditis	1	18	0.559396	0.969978	ko05416	LOC105228222(Act79B)	K05692
												Human Diseases	Infectious diseases	Chagas disease (American trypanosomiasis)	2	42	0.563372	0.969978	ko05142	LOC105229185(--);LOC105232277(Ance)	K01283+K01283
												Organismal Systems	Aging	Longevity regulating pathway - mammal	2	43	0.576324	0.969978	ko04211	LOC105225893(atg101);LOC105230971(InR)	K19730+K05087
												Organismal Systems	Nervous system	Long-term potentiation	2	43	0.576324	0.969978	ko04720	LOC105233100(Grin2b);LOC105233410(inaC)	K05210+K02677
												Organismal Systems	Nervous system	Glutamatergic synapse	2	43	0.576324	0.969978	ko04724	LOC105233100(Grin2b);LOC105233410(inaC)	K05210+K02677
												Environmental Information Processing	Signal transduction	Jak-STAT signaling pathway	1	19	0.579066	0.969978	ko04630	LOC105222207(Myc)	K04377
												Human Diseases	Cancers	Acute myeloid leukemia	1	19	0.579066	0.969978	ko05221	LOC105222207(Myc)	K04377
												Human Diseases	Cancers	Pathways in cancer	8	185	0.584906	0.969978	ko05200	LOC105222207(Myc);LOC105225122(dpp);LOC105228298(GSTT1);LOC105229681(GST1);LOC105230971(InR);LOC105232205(--);LOC105233410(inaC);LOC115066544(pnt)	K04377+K04662+K00799+K00799+K05087+K10456+K02677+K02678
												Metabolism	Carbohydrate metabolism	Pentose phosphate pathway	1	20	0.597864	0.969978	ko00030	LOC105224618(Pfk)	K00850
												Metabolism	Glycan biosynthesis and metabolism	Other glycan degradation	1	20	0.597864	0.969978	ko00511	LOC105229216(HEXB)	K12373
												Metabolism	Glycan biosynthesis and metabolism	Mucin type O-glycan biosynthesis	1	20	0.597864	0.969978	ko00512	LOC105225673(C1GalTA)	K00731
												Environmental Information Processing	Signal transduction	Hippo signaling pathway	3	69	0.5986	0.969978	ko04390	LOC105222207(Myc);LOC105225122(dpp);LOC105228222(Act79B)	K04377+K04662+K05692
												Organismal Systems	Environmental adaptation	Circadian entrainment	2	45	0.601386	0.969978	ko04713	LOC105233100(Grin2b);LOC105233410(inaC)	K05210+K02677
												Organismal Systems	Nervous system	Serotonergic synapse	2	45	0.601386	0.969978	ko04726	LOC105228430(Slc18a2);LOC105233410(inaC)	K08155+K02677
												Environmental Information Processing	Signal transduction	MAPK signaling pathway	4	94	0.607761	0.973976	ko04010	LOC105222207(Myc);LOC105230971(InR);LOC105231830(Hsc70-2);LOC105233410(inaC)	K04377+K05087+K03283+K02677
												Environmental Information Processing	Signal transduction	Notch signaling pathway	1	21	0.615827	0.97441	ko04330	LOC105221842(fng)	K05948
												Human Diseases	Cancers	Basal cell carcinoma	1	21	0.615827	0.97441	ko05217	LOC105225122(dpp)	K04662
												Organismal Systems	Nervous system	Cholinergic synapse	2	47	0.625326	0.983217	ko04725	LOC105229768(ACHE1);LOC105233410(inaC)	K01049+K02677
												Organismal Systems	Immune system	Cytosolic DNA-sensing pathway	1	22	0.632994	0.985257	ko04623	LOC105223718(Trex1)	K10790
												Organismal Systems	Nervous system	Synaptic vesicle cycle	2	49	0.648146	0.985257	ko04721	LOC105227818(ATP6V0A1);LOC105228430(Slc18a2)	K02154+K08155
												Cellular Processes	Transport and catabolism	Autophagy - other eukaryotes	1	23	0.649398	0.985257	ko04136	LOC105225893(atg101)	K19730
												Organismal Systems	Excretory system	Collecting duct acid secretion	1	23	0.649398	0.985257	ko04966	LOC105227818(ATP6V0A1)	K02154
												Organismal Systems	Immune system	Fc gamma R-mediated phagocytosis	2	50	0.659141	0.985257	ko04666	LOC105227848(PLPP1);LOC105233410(inaC)	K01080+K02677
												Cellular Processes	Cell growth and death	Cell cycle	3	76	0.664444	0.985257	ko04110	LOC105222207(Myc);LOC105226613(Mcm2);LOC105229089(Mcm7)	K04377+K02540+K02210
												Metabolism	Carbohydrate metabolism	Fructose and mannose metabolism	1	25	0.680054	0.985257	ko00051	LOC105224618(Pfk)	K00850
												Environmental Information Processing	Signal transduction	Hedgehog signaling pathway - fly	1	25	0.680054	0.985257	ko04341	LOC105225122(dpp)	K04662
												Organismal Systems	Endocrine system	Adipocytokine signaling pathway	1	25	0.680054	0.985257	ko04920	LOC105232191(Pepck)	K01596
												Organismal Systems	Digestive system	Mineral absorption	1	25	0.680054	0.985257	ko04978	LOC105231062(--)	K14686
												Human Diseases	Infectious diseases	Hepatitis B	2	52	0.680309	0.985257	ko05161	LOC105222207(Myc);LOC105233410(inaC)	K04377+K02677
												Metabolism	Lipid metabolism	Sphingolipid metabolism	1	26	0.694368	0.985257	ko00600	LOC105227848(PLPP1)	K01080
												Human Diseases	Infectious diseases	Hepatitis C	1	26	0.694368	0.985257	ko05160	LOC105225577(Pdk1)	K06276
												Organismal Systems	Endocrine system	Relaxin signaling pathway	2	54	0.700401	0.985257	ko04926	LOC105230493(Rxfp2);LOC105233410(inaC)	K04307+K02677
												Human Diseases	Cancers	Chronic myeloid leukemia	1	27	0.708046	0.985257	ko05220	LOC105222207(Myc)	K04377
												Human Diseases	Neurodegenerative diseases	Amyotrophic lateral sclerosis (ALS)	1	28	0.721116	0.985257	ko05014	LOC105233100(Grin2b)	K05210
												Human Diseases	Cancers	Small cell lung cancer	1	28	0.721116	0.985257	ko05222	LOC105222207(Myc)	K04377
												Human Diseases	Cardiovascular diseases	Dilated cardiomyopathy (DCM)	1	28	0.721116	0.985257	ko05414	LOC105228222(Act79B)	K05692
												Environmental Information Processing	Signal transduction	Phosphatidylinositol signaling system	2	57	0.728579	0.985257	ko04070	LOC105230334(CG34384);LOC105233410(inaC)	K00901+K02677
												Organismal Systems	Immune system	Natural killer cell mediated cytotoxicity	1	30	0.745538	0.985257	ko04650	LOC105233410(inaC)	K02677
												Organismal Systems	Digestive system	Salivary secretion	2	59	0.746101	0.985257	ko04970	LOC105228352(LysD);LOC105233410(inaC)	K13915+K02677
												Human Diseases	Infectious diseases	Legionellosis	1	31	0.75694	0.985257	ko05134	LOC105231830(Hsc70-2)	K03283
												Organismal Systems	Development	Axon guidance	2	61	0.762652	0.985257	ko04360	LOC105221897(trp);LOC105233410(inaC)	K04967+K02677
												Human Diseases	Infectious diseases	Tuberculosis	2	61	0.762652	0.985257	ko05152	LOC105223482(Mbl2);LOC105227818(ATP6V0A1)	K06560+K02154
												Environmental Information Processing	Signal transduction	VEGF signaling pathway	1	32	0.767834	0.985257	ko04370	LOC105233410(inaC)	K02677
												Organismal Systems	Immune system	T cell receptor signaling pathway	1	32	0.767834	0.985257	ko04660	LOC105225577(Pdk1)	K06276
												Human Diseases	Infectious diseases	Bacterial invasion of epithelial cells	1	32	0.767834	0.985257	ko05100	LOC105228222(Act79B)	K05692
												Metabolism	Carbohydrate metabolism	Galactose metabolism	1	33	0.778244	0.985257	ko00052	LOC105224618(Pfk)	K00850
												Human Diseases	Infectious diseases	Measles	1	33	0.778244	0.985257	ko05162	LOC105231830(Hsc70-2)	K03283
												Organismal Systems	Endocrine system	Insulin signaling pathway	2	63	0.778268	0.985257	ko04910	LOC105225577(Pdk1);LOC105232191(Pepck)	K06276+K01596
												Environmental Information Processing	Signal transduction	Calcium signaling pathway	2	64	0.785735	0.985257	ko04020	LOC105222913(TkR99D);LOC105233410(inaC)	K04224+K02677
												Metabolism	Metabolism of cofactors and vitamins	Folate biosynthesis	1	34	0.788189	0.985257	ko00790	LOC105227008(Alp4)	K01077
												Environmental Information Processing	Signal transduction	Sphingolipid signaling pathway	2	65	0.792983	0.985257	ko04071	LOC105225577(Pdk1);LOC105233410(inaC)	K06276+K02677
												Human Diseases	Drug resistance	Endocrine resistance	1	35	0.797692	0.985257	ko01522	LOC105230971(InR)	K05087
												Human Diseases	Infectious diseases	Shigellosis	1	35	0.797692	0.985257	ko05131	LOC105228222(Act79B)	K05692
												Human Diseases	Cancers	Colorectal cancer	1	35	0.797692	0.985257	ko05210	LOC105222207(Myc)	K04377
												Cellular Processes	Cell growth and death	Cellular senescence	2	66	0.800015	0.985257	ko04218	LOC105222207(Myc);LOC115066544(pnt)	K04377+K02678
												Organismal Systems	Endocrine system	Oxytocin signaling pathway	2	66	0.800015	0.985257	ko04921	LOC105228222(Act79B);LOC105233410(inaC)	K05692+K02677
												Organismal Systems	Excretory system	Endocrine and other factor-regulated calcium reabsorption	1	36	0.806771	0.985257	ko04961	LOC105233410(inaC)	K02677
												Human Diseases	Infectious diseases	Salmonella infection	1	36	0.806771	0.985257	ko05132	LOC105228222(Act79B)	K05692
												Environmental Information Processing	Signal transduction	mTOR signaling pathway	3	96	0.808626	0.985257	ko04150	LOC105225577(Pdk1);LOC105230971(InR);LOC105233410(inaC)	K06276+K05087+K02677
												Human Diseases	Infectious diseases	Amoebiasis	1	37	0.815446	0.985257	ko05146	LOC105233410(inaC)	K02677
												Human Diseases	Cancers	Renal cell carcinoma	1	37	0.815446	0.985257	ko05211	LOC115066544(pnt)	K02678
												Metabolism	Nucleotide metabolism	Purine metabolism	4	125	0.815661	0.985257	ko00230	LOC105227488(SPCC285.04);LOC105227970(PNP);LOC105230951(XDH);LOC105232649(ada2)	K07127+K03783+K00106+K19572
												Metabolism	Carbohydrate metabolism	Citrate cycle (TCA cycle)	1	38	0.823733	0.985257	ko00020	LOC105232191(Pepck)	K01596
												Organismal Systems	Endocrine system	Thyroid hormone synthesis	1	38	0.823733	0.985257	ko04918	LOC105233410(inaC)	K02677
												Human Diseases	Endocrine and metabolic diseases	AGE-RAGE signaling pathway in diabetic complications	1	39	0.831651	0.985257	ko04933	LOC105233410(inaC)	K02677
												Genetic Information Processing	Translation	Aminoacyl-tRNA biosynthesis	1	40	0.839215	0.985257	ko00970	LOC105222249(NARS)	K01893
												Human Diseases	Substance dependence	Morphine addiction	1	40	0.839215	0.985257	ko05032	LOC105233410(inaC)	K02677
												Human Diseases	Infectious diseases	HTLV-I infection	3	103	0.845066	0.985257	ko05166	LOC105222207(Myc);LOC105230724(FDPS);LOC115066544(pnt)	K04377+K00787+K02678
												Metabolism	Carbohydrate metabolism	Inositol phosphate metabolism	1	41	0.846442	0.985257	ko00562	LOC105226135(miox)	K00469
												Human Diseases	Infectious diseases	Human cytomegalovirus infection	2	74	0.849074	0.985257	ko05163	LOC105222207(Myc);LOC105233410(inaC)	K04377+K02677
												Cellular Processes	Cell growth and death	Necroptosis	1	42	0.853346	0.985257	ko04217	LOC105222926(Gdh)	K00261
												Organismal Systems	Nervous system	GABAergic synapse	1	42	0.853346	0.985257	ko04727	LOC105233410(inaC)	K02677
												Human Diseases	Cancers	Gastric cancer	1	42	0.853346	0.985257	ko05226	LOC105222207(Myc)	K04377
												Environmental Information Processing	Signal transduction	Wnt signaling pathway	2	75	0.854376	0.985257	ko04310	LOC105222207(Myc);LOC105233410(inaC)	K04377+K02677
												Organismal Systems	Endocrine system	Parathyroid hormone synthesis, secretion and action	1	43	0.859942	0.985257	ko04928	LOC105233410(inaC)	K02677
												Organismal Systems	Endocrine system	Aldosterone synthesis and secretion	1	44	0.866243	0.985257	ko04925	LOC105233410(inaC)	K02677
												Metabolism	Nucleotide metabolism	Pyrimidine metabolism	2	78	0.869286	0.985257	ko00240	LOC105227970(PNP);LOC105233253(Upp1)	K03783+K00757
												Organismal Systems	Immune system	Platelet activation	1	45	0.872263	0.985257	ko04611	LOC105228222(Act79B)	K05692
												Organismal Systems	Sensory system	Inflammatory mediator regulation of TRP channels	1	45	0.872263	0.985257	ko04750	LOC105233410(inaC)	K02677
												Organismal Systems	Nervous system	Neurotrophin signaling pathway	1	46	0.878013	0.985257	ko04722	LOC105225577(Pdk1)	K06276
												Organismal Systems	Endocrine system	GnRH signaling pathway	1	48	0.888754	0.985257	ko04912	LOC105233410(inaC)	K02677
												Organismal Systems	Endocrine system	Melanogenesis	1	48	0.888754	0.985257	ko04916	LOC105233410(inaC)	K02677
												Cellular Processes	Cell growth and death	Apoptosis - fly	1	49	0.893766	0.985257	ko04214	LOC105225270(Eip74EF)	K09428
												Human Diseases	Infectious diseases	Epithelial cell signaling in Helicobacter pylori infection	1	49	0.893766	0.985257	ko05120	LOC105227818(ATP6V0A1)	K02154
												Genetic Information Processing	Folding, sorting and degradation	RNA degradation	1	50	0.898555	0.985257	ko03018	LOC105224618(Pfk)	K00850
												Cellular Processes	Cellular community - eukaryotes	Gap junction	1	50	0.898555	0.985257	ko04540	LOC105233410(inaC)	K02677
												Human Diseases	Infectious diseases	Kaposi sarcoma-associated herpesvirus infection	1	50	0.898555	0.985257	ko05167	LOC105222207(Myc)	K04377
												Organismal Systems	Endocrine system	Progesterone-mediated oocyte maturation	1	52	0.907497	0.990718	ko04914	LOC105230971(InR)	K05087
												Organismal Systems	Endocrine system	Insulin secretion	1	53	0.911671	0.990947	ko04911	LOC105233410(inaC)	K02677
												Organismal Systems	Endocrine system	Estrogen signaling pathway	1	54	0.915657	0.990971	ko04915	LOC105231830(Hsc70-2)	K03283
												Organismal Systems	Circulatory system	Adrenergic signaling in cardiomyocytes	1	59	0.933061	0.998301	ko04261	LOC105233410(inaC)	K02677
												Cellular Processes	Cellular community - eukaryotes	Tight junction	1	61	0.938979	0.998301	ko04530	LOC105228222(Act79B)	K05692
												Human Diseases	Infectious diseases	Human papillomavirus infection	3	132	0.939406	0.998301	ko05165	LOC105221842(fng);LOC105222583(thbs3a);LOC105227818(ATP6V0A1)	K05948+K04659+K02154
												Human Diseases	Infectious diseases	Epstein-Barr virus infection	2	99	0.940236	0.998301	ko05169	LOC105222207(Myc);LOC105231830(Hsc70-2)	K04377+K03283
												Human Diseases	Neurodegenerative diseases	Parkinson disease	2	102	0.946733	0.998301	ko05012	LOC105227310(DAT);LOC105228430(Slc18a2)	K05036+K08155
												Cellular Processes	Cell motility	Regulation of actin cytoskeleton	1	64	0.946894	0.998301	ko04810	LOC105228222(Act79B)	K05692
												Cellular Processes	Cell growth and death	Oocyte meiosis	1	69	0.957884	0.998301	ko04114	LOC105230971(InR)	K05087
												Cellular Processes	Transport and catabolism	Endocytosis	2	109	0.959391	0.998301	ko04144	LOC105230971(InR);LOC105231830(Hsc70-2)	K05087+K03283
												Genetic Information Processing	Folding, sorting and degradation	Protein processing in endoplasmic reticulum	2	110	0.960947	0.998301	ko04141	LOC105222463(Hsp23);LOC105231830(Hsc70-2)	K09542+K03283
												Environmental Information Processing	Signal transduction	cAMP signaling pathway	1	75	0.968128	0.998301	ko04024	LOC105233100(Grin2b)	K05210
												Organismal Systems	Nervous system	Retrograde endocannabinoid signaling	1	76	0.969577	0.998301	ko04723	LOC105233410(inaC)	K02677
												Genetic Information Processing	Translation	RNA transport	2	117	0.970349	0.998301	ko03013	LOC105224486(--);LOC105229288(EIF4EBP1)	K14292+K18644
												Genetic Information Processing	Folding, sorting and degradation	Ubiquitin mediated proteolysis	1	81	0.975894	0.999151	ko04120	LOC105232205(--)	K10456
												Metabolism	Energy metabolism	Oxidative phosphorylation	1	111	0.994082	0.999151	ko00190	LOC105227818(ATP6V0A1)	K02154
												Genetic Information Processing	Transcription	Spliceosome	1	112	0.994354	0.999151	ko03040	LOC105231830(Hsc70-2)	K03283
												Genetic Information Processing	Translation	Ribosome	1	123	0.996638	0.999151	ko03010	LOC115066478(UBI1)	K02927
												Human Diseases	Neurodegenerative diseases	Alzheimer disease	1	125	0.996941	0.999151	ko05010	LOC105233100(Grin2b)	K05210
												Human Diseases	Neurodegenerative diseases	Huntington disease	1	149	0.99902	0.999151	ko05016	LOC105233100(Grin2b)	K05210
												Organismal Systems	Environmental adaptation	Thermogenesis	1	152	0.999151	0.999151	ko04714	LOC105228222(Act79B)	K05692
