# Supplementary material for: Protein feeding mediates sex pheromone biosynthesis in an insect
Source: eLife. 2023 Jan 19;12:e83469. doi: 10.7554/eLife.83469 (PMC9908074; doi:10.7554/eLife.83469)
Supplement: Supplementary file 6. [file elife-83469-supp6.xlsx]

## Sheet: all.genes.expression.annot
id	Rect-0d-1_fpkm	Rect-0d-2_fpkm	Rect-0d-3_fpkm	Rect-0d-4_fpkm	Rect-0d-5_fpkm	Rect-3d-1_fpkm	Rect-3d-2_fpkm	Rect-3d-3_fpkm	Rect-3d-4_fpkm	Rect-3d-5_fpkm	Rect-6d-1_fpkm	Rect-6d-2_fpkm	Rect-6d-3_fpkm	Rect-6d-4_fpkm	Rect-6d-5_fpkm	Rect-9d-1_fpkm	Rect-9d-2_fpkm	Rect-9d-3_fpkm	Rect-9d-4_fpkm	Rect-9d-5_fpkm	Rect-12d-1_fpkm	Rect-12d-2_fpkm	Rect-12d-3_fpkm	Rect-12d-4_fpkm	Rect-12d-5_fpkm	Rect-0d-1_count	Rect-0d-2_count	Rect-0d-3_count	Rect-0d-4_count	Rect-0d-5_count	Rect-3d-1_count	Rect-3d-2_count	Rect-3d-3_count	Rect-3d-4_count	Rect-3d-5_count	Rect-6d-1_count	Rect-6d-2_count	Rect-6d-3_count	Rect-6d-4_count	Rect-6d-5_count	Rect-9d-1_count	Rect-9d-2_count	Rect-9d-3_count	Rect-9d-4_count	Rect-9d-5_count	Rect-12d-1_count	Rect-12d-2_count	Rect-12d-3_count	Rect-12d-4_count
41	29.43	26.62	27.37	25.49	28.24	26.1	31.87	24.24	25.57	29.43	31.6	32.69	25.12	28.53	29.52	38.64	37.85	36.45	38.69	44.3	43.24	43.5	48.1	45.79	48.56	3461	2645	3220	2620	2838	2420	3979	2016	2403	3158	2823	3525	2032	2019	2402	3276	4116	3816	3164	4087	3891	3612	5381	5066
ATP6	18457.6	17026.5	18696.1	17484.5	18826	17559.2	16658.5	18944.9	17511.6	15706.2	17326.2	17321.7	19128.5	17642	18753.9	19022.3	19667.4	17383.2	19333.3	16842.9	16673.6	16568.2	12319	14359	15905.2	233295	181862	236434	193170	203360	175005	223515	169354	176859	181132	166371	200767	166323	134184	164031	173358	229849	195579	169907	167015	161279	147878	148128	170741
ATP8	5.37	3.17	5.03	5.37	10.99	6.38	4.11	4.74	4.62	3.31	3.97	8.41	4.88	7.25	4.36	6.98	6.53	2.64	6.75	4.27	3.07	5.7	3.53	4.63	0.42	16	8	15	14	28	15	13	10	11	9	9	23	10	13	9	15	18	7	14	10	7	12	10	13
Adf1	9.36	9.73	9.99	10.08	9.78	8.53	8.6	8.93	10.8	10.35	9.33	10.75	8.39	11.62	8.93	11.09	12.18	11.17	11.82	10.88	13.41	11.13	12.7	12.17	11.21	206	181	220	194	184	148	201	139	190	208	156	217	127	154	136	176	248	219	181	188	226	173	266	252
Adf1_1	1.15	0.85	0.82	0.66	0.68	0.46	0.66	0.63	0.42	0.45	0.67	1.22	0.75	0.54	1.07	1.26	1.6	1.21	1.68	1.62	1.68	1.66	1.79	1.29	2.01	43.29	26.92	30.71	21.57	21.91	13.62	26.39	16.66	12.7	15.43	19.3	42.19	19.29	12.33	27.9	34.19	55.85	40.41	44.08	47.69	48.28	44.02	64	45.59
Akt1	19.09	15.27	13.78	13.87	17.72	16.43	17.49	13.57	14.7	18.4	16.5	18.44	13.47	11.06	15.09	23.46	22.26	23.03	22.03	25.02	27.6	23.33	26.12	31.39	28.68	1095	801	889	847	898	752	1084	627	781	959	698	928	567	397	625	1006	1261	1194	900	1212	1279	1047	1501	1730
Bab2	0.57	0.62	0.62	0.73	0.9	0.77	0.65	0.72	0.37	0.51	0.8	0.89	0.61	0.87	0.45	0.8	0.77	0.86	1.15	0.86	0.93	0.93	1.07	1.22	1.02	34	32	38	39	47	37	42	31	18	28	37	50	25	32	19	34	43	46	48	41	43	40	60	68
C149b	4.08	2.8	2.23	2.65	2.43	0.89	1.71	1.14	1.43	1.68	1.23	1.33	1.21	1.6	1.8	2.63	1.77	2.95	2.13	2.42	2.95	2.94	3.44	2.87	2.86	157	91	86	89	80	27	70	31	44	59	36	47	32	37	48	73	63	101	57	73	87	80	126	104
COX1	33055.6	34350.2	36194.3	34587.2	39121.7	39624.7	40239.7	46016.7	42425.2	41002.9	46881.4	47013.7	51360.2	46775.2	44781.5	46560.6	51062.5	47943.2	50293.7	44201.5	46233.3	46950.5	41998.2	43176.4	44314.5	949671	833961	1040392	868560	960560	897655	1227227	935011	973920	1074822	1023234	1238583	1015072	808661	890291	964494	1356429	1226078	1004659	996264	1016488	952508	1147863	1166973
COX2	17493.1	16740.1	18228.7	17718.2	19700.3	16302.8	16211.3	17102.5	17830.8	15785	19893.3	20306.5	20025.7	19813.5	21921.7	20388.6	22369.7	19563.2	22357.5	19854.2	19237.7	19138.8	16044.1	16946.7	17322.8	225368	182252	234969	199527	216909	165617	221710	155833	183556	185551	194706	239902	177482	153607	195436	189394	266473	224351	200275	200672	189670	174117	196641	205398
COX3	29516	31865.2	34250.6	32663.6	35823.3	27970.3	30755.5	34386	30007.9	29408.4	34791	34877.4	37919.4	33638.2	33514.5	33041.9	37239.2	35546.7	38255.4	31830.7	33804.7	33293.8	29946.9	31483.4	31178.1	435061	396914	505113	420835	451269	325091	481234	358465	353427	395509	389588	471421	384499	298365	341845	351164	507526	466395	392068	368085	381319	346542	419928	436575
CYTB	16844.5	16639.8	18088.4	17794.1	18724.7	18694.3	20252.3	20843	18965.2	18355.8	22650.4	22778.2	24092.4	21618.1	21619.1	25538.2	27665.5	25938.2	27656	24707.6	25829.4	25813.2	25230.6	25961.2	26725.9	357580	298506	384190	330178	339710	312926	456386	312931	321695	355535	365290	443413	351834	276157	317584	390893	543027	490138	408209	411486	419613	386952	509536	518474
Cc115	44.77	41.1	51.37	48.67	48.84	46.79	45.7	47.31	44.15	44.89	51.42	53.7	48.45	51.15	50.86	54.05	52.94	59.31	47.93	60.45	55.48	56.09	56.16	66.36	58.5	707.64	538.77	768.75	639.19	643.58	568.16	745.75	475.82	501.41	613.97	625.54	748.13	522.48	472.46	524.69	635.6	752.74	820.51	532.87	735.86	691.9	616.13	815.33	952.33
Cc28b	30.41	27.99	30.23	28.63	28.16	26.53	26.93	27.47	30.57	28.75	29.6	28.05	31.22	31.46	32.22	32.91	31.95	35.96	33.43	33.18	40.56	34.93	39.08	38.09	38.83	657	509	654	544	511	436	600	412	507	556	475	537	443	399	475	514	625	678	498	552	654	518	779	748
Cg050	23.16	22.94	23.3	21.72	21.21	9.39	10.48	9.18	7.75	10.32	12.06	11.7	9.37	8.45	10.19	14.04	11.6	13.58	14.48	14.57	15.79	17.61	16.14	17.23	18.67	460	385	463	377	360	147	221	129	123	187	182	213	128	101	140	201	213	240	200	227	240	247	305	322
Comm	139.87	149.04	149.72	162.52	147.27	122.32	152.74	134.23	105.23	103.15	129.78	128.18	150	128.46	111.52	116.67	138.8	128.88	123.04	106.6	110.03	126.52	147.98	147.15	142.68	4681	4176	5014	4742	4204	3152	5348	3111	2762	3099	3278	3882	3425	2576	2569	2805	4297	3833	2859	2760	2806	2985	4686	4610
Cs052	30.22	27.8	26.26	30.58	25.9	20.68	22.98	18.57	21.06	17.87	22.15	21.17	19.66	21.08	23.01	24.05	24.22	19.48	19.45	23.92	20.13	24.56	19.73	21.53	23.66	467	363	406	413	342	252	377	203	260	252	260	300	209	196	246	268	346	268	209	290	238	268	290	313
Csga	23.86	22.97	24.14	25.51	22.32	25.14	25.93	29.58	30.61	29.42	23.18	28.73	28.95	32.68	29.67	34.04	26.25	29.38	29.8	25.54	26.91	24.26	25.31	25.79	27.28	492	398	493	460	393	410	565	430	506	548	362	545	412	405	423	506	502	539	422	412	426	352	491	498
Dcp1b	18.7	16.37	17.39	15.98	17.84	8.9	11.58	10.16	10.93	13.14	14.32	14.06	11.67	10.71	14.56	17.09	14.05	16.22	15.55	18.36	21.98	20.5	18.28	20.6	21.07	557	412	518	416	454	209	366	214	260	357	324	384	239	192	300	367	387	430	322	429	501	431	518	577
Dlgp2	19.96	18.85	17.74	17.84	19.47	5.19	10.74	4.9	6.19	8.35	9.99	11.68	7.03	8.05	11.89	17.42	17.53	15.66	17.64	18.49	22.98	22.8	21.56	21.98	21.26	1055	836	941	828	870	216	598	179	261	393	404	571	254	251	435	667	853	724	652	764	930	849	1073	1093
E4f1	1.66	1.52	1.58	1.33	1.48	1.17	1.43	1.01	1.09	1.19	1.62	1.61	1.12	1.74	1.62	1.98	2.52	2.38	2.64	2.7	3.28	2.95	2.63	3.08	3.21	141	107	134	101	105	76	127	59	70	94	103	122	62	88	96	117	199	176	150	177	208	173	210	241
Frpd4	9.84	9.12	10.05	8.51	9.41	3.57	6.47	3.56	3.56	4.5	5.78	6.49	4.66	5.59	6.34	9.65	10.09	9.58	9.54	10.76	9.51	9.84	9.43	9.72	9.79	1197	1005	1256	928	1031	347	826	334	364	505	579	778	414	456	584	911	1179	1085	860	1081	942	902	1130	1170
Irs1	2.61	2.93	1.92	1.73	3.7	0.7	1.55	1.36	2.06	0.9	1.09	1.35	2	1.14	1.19	2.1	1.19	2.01	1.58	2.28	4.49	4.87	2.17	2.05	3.13	19	18	14	11	23	4	12	7	12	6	6	9	10	5	6	11	8	13	8	13	25	25	15	14
Irs1_2	6.09	4.07	3.57	4.09	4.34	2.35	2.49	1.87	2.98	2.76	5.05	2.6	0.96	1.54	1.72	6.61	5.44	4.16	4.76	4.55	7.43	6.37	8.35	4.78	6.53	46	26	27	27	28	14	20	10	18	19	29	18	5	7	9	36	38	28	25	27	43	34	60	34
Irs1_3	17.63	16	15.99	15.5	16.6	5.52	9.8	7.53	6.93	7.23	10.39	11.41	6.77	8.34	11.54	17.41	16.94	19.16	18.05	20.55	26.99	27.8	26.58	25.11	26.1	583	447	529	448	469	144	344	176	183	218	261	346	154	166	264	415	518	564	415	533	683	649	836	781
K1161	172.56	161.93	166.51	175.35	164.19	129.03	144.98	120.33	114.36	118.11	88.99	95.95	89.24	86.71	82.2	88.26	96.64	92.09	92.34	91.52	81.62	82.69	97.34	90.25	83.2	10973	8702	10594	9747	8923	6470	9787	5412	5811	6853	4299	5595	3904	3318	3617	4047	5682	5213	4083	4566	3972	3713	5889	5399
L12r1	1.98	1.95	2.47	2.58	2.64	2.67	2.64	3.06	1.6	2.47	2.89	2.53	2.13	3.8	2.51	1.9	2.28	2.4	3.25	2.68	2.35	2.25	2.5	2.66	2.59	65	54	81	74	74	69	92	71	42	74	72	76	48	75	57	45	69	70	74	69	59	52	78	82
LOC105221763	28.34	27.96	27.39	25.37	28.74	50.38	49.71	46.32	48.28	55.04	47.71	41.66	49.84	50.77	51.15	43.61	45.13	49.98	45.04	49.39	48.53	49.64	47.92	50.09	47.95	667	556	645	522	578	935	1242	771	908	1182	853	899	807	719	833	740	982	1047	737	912	874	825	1073	1109
LOC105221765	1.62	1.82	1.76	1.55	1.27	0.66	0.93	0.76	0.52	0.8	0.6	0.9	0.62	0.45	0.83	0.83	0.82	0.65	0.71	0.99	0.74	1.14	0.54	0.58	0.74	157	148	169	130	105	49	94	52	40	70	44	80	41	26	55	57	73	55	47	75	54	77	48	52
LOC105221766	4.74	4.62	2.59	6.7	2.28	5.51	3.83	2.98	6.18	6.85	6.24	4.08	3.01	4.76	4.43	5.14	3.49	5.91	4.35	6.19	7.03	3.78	3.06	3.05	4.43	119	98	65	147	49	109	102	53	124	157	119	94	52	72	77	93	81	132	76	122	135	67	73	72
LOC105221767	24.97	24.9	25.03	27.52	26.01	12.47	13.36	12.4	13.32	12.24	13.85	12.66	12.75	14.98	12.42	13.19	14.34	16.26	16.16	18.7	16.27	16.3	15.55	16.07	15.78	1011	852	1014	974	900	398	574	355	431	452	426	470	355	365	348	385	537	586	455	594	504	466	599	612
LOC105221768	27.11	29.63	32.28	27.3	29.7	52.38	51.59	54.12	51.09	57.92	56.33	54.5	58.2	54.19	49.16	57.98	62.07	56.04	56.25	51.37	48.28	54.31	53.9	52.2	48.76	812	754	966	713	765	1237	1641	1148	1222	1586	1281	1499	1197	975	1018	1250	1717	1492	1172	1203	1108	1145	1535	1467
LOC105221769	6.02	5	4.81	5.41	5.31	8.13	6.33	4.42	6.61	6.43	5.3	5.16	3.75	5.72	5.59	5.42	4.19	6.1	3.88	4.53	5.47	5.87	5.18	4.82	5.69	154	108	123	121	116	164	172	80	135	150	103	121	66	88	99	100	99	139	69	91	107	106	126	116
LOC105221770	17.2	15.45	15.11	14.32	15.54	8.87	17.03	8.73	11.19	10.66	10.13	12.76	6.97	6.94	11.9	21.28	21.81	20.97	19.71	24.95	30.62	32.71	25.05	28.06	30.4	610	463	536	444	471	248	641	219	317	345	273	415	170	148	292	544	715	662	486	694	831	819	845	936
LOC105221771	0.18	0.24	0.3	0.13	0.2	0.25	0.88	0.37	0.48	0.63	0.56	1.02	0.87	0.63	0.42	0.53	0.86	1.13	0.78	0.62	1.11	1.02	0.95	1.5	1.5	9	9	15	5	8	9	42	13	18	26	21	43	27	18	13	17	38	48	26	24	39	34	43	67
LOC105221772	9.67	10.26	10.67	10.31	10.13	9.51	10.32	7.95	8.95	8.81	9.55	10.27	10.15	10.88	9.25	10.63	11.16	11.49	10.76	12.48	10.71	11.42	10.08	11.42	11.24	733	657	809	683	656	568	830	426	542	609	550	714	529	496	485	581	782	775	567	742	621	611	727	814
LOC105221773	0.78	0.86	0.92	0.9	0.77	0.58	0.79	0.57	0.6	0.48	0.37	0.5	0.51	0.54	0.6	0.65	0.55	0.52	0.6	0.5	0.62	0.51	0.64	0.58	0.57	117	109	137	117	98	68	126	60	72	66	42	68	52	49	62	70	76	69	62	59	71	54	91	82
LOC105221774	0.02	0	0.06	0	0.02	0.67	0.32	0.27	0.05	0.12	0.32	0.54	0.36	0.6	0.33	0.32	0.53	0.47	0.41	0.19	1.81	0.51	0.88	0.38	0.07	1	0	3	0	1	28	18	10	2	6	13	26	13	19	12	12	26	22	15	8	73	19	44	19
LOC105221775	36.72	32.69	30.49	40.7	35.7	42.79	44.3	40.17	45.84	43.78	36.71	43.09	34.31	48.81	49.65	35.64	34.04	37.61	35.08	42.01	42.72	42.34	34.64	36.05	37.82	420	316	349	407	349	386	538	325	419	457	319	452	270	336	393	294	360	383	279	377	374	342	377	388
LOC105221777	3.56	4.37	3.48	4.36	4.27	2.98	2.84	3.14	3.67	2.71	3.15	3.57	2.62	2.37	3.39	2.91	2.72	3.67	2.29	2.94	3.4	3.62	3.26	3.43	4.03	85	88	83	91	87	56	72	53	70	59	57	78	43	34	56	50	60	78	38	55	62	61	74	77
LOC105221778	0	0	0	0	0	0	0	0.09	0.16	0.14	0	0	0	0	0	0	0	0	0	0	0	0.28	0.07	0	0	0	0	0	0	0	0	0	1	2	2	0	0	0	0	0	0	0	0	0	0	0	3	1	0
LOC105221779	0	0	0	0	0	0	0	0	0	0	0	0	0	0	0	0	0	0	0	0	0	0	0.04	0	0	0	0	0	0	0	0	0	0	0	0	0	0	0	0	0	0	0	0	0	0	0	0	1	0
LOC105221780	0	0	0	0	0	0	0	0.06	0.1	0	0	0	0	0	0	0	0.04	0	0	0	0	0	0	0	0	0	0	0	0	0	0	0	1	2	0	0	0	0	0	0	0	1	0	0	0	0	0	0	0
LOC105221781	0	0	0	0	0	0	0	0	0	0	0	0	0	0.11	0	0	0	0	0	0	0	0	0	0	0	0	0	0	0	0	0	0	0	0	0	0	0	0	1	0	0	0	0	0	0	0	0	0	0
LOC105221782	41.7	38.81	39.12	42.3	37.03	76.11	74.54	75.47	74.29	73.22	63.57	57.71	60.99	60.19	59.18	58.19	56.86	58.78	63.6	51.81	51.73	55.71	58.8	56.58	53.84	829	652	778	735	629	1193	1573	1061	1180	1328	960	1052	834	720	814	834	1045	1040	879	808	787	782	1112	1058
LOC105221783	0	0	0	0	0	0.03	0	0.04	0	0	0.11	0.06	0	0	0.04	0	0.03	0.05	0	0	0	0	0.03	0.03	0	0	0	0	0	0	1	0	1	0	0	3	2	0	0	1	0	1	2	0	0	0	0	1	1
LOC105221784	101.05	95.16	99.8	99.06	99.18	143.23	143.43	141.74	178.03	190.36	139.4	146.53	135.67	151.49	156.84	150.61	131.85	163.79	139.49	158.82	178.94	165.35	161.43	163.42	163.42	1768	1407	1747	1515	1483	1976	2664	1754	2489	3039	1853	2351	1633	1595	1899	1900	2133	2551	1697	2180	2396	2043	2687	2690
LOC105221785	0	0.11	0.15	0.06	0.34	0	0.36	0.14	0.3	0.42	0.13	0.11	0.14	0.08	0.28	0.34	0.31	0.16	0.21	0.56	0.32	0.48	0.15	0.51	0.31	0	2	3	1	6	0	8	2	5	8	2	2	2	1	4	5	6	3	3	9	5	7	3	10
LOC105221786	0.67	1.18	0.59	1.09	0.89	0.24	0.9	0.4	0.74	1.82	0.41	0.49	0.48	0.4	0.48	0.4	0.26	0.21	0.55	0.39	1.09	0.27	0.47	0.51	0.18	28	42	25	40	32	8	40	12	25	70	13	19	14	10	14	12	10	8	16	13	35	8	19	20
LOC105221787	5.41	6.04	5.72	6.3	6.25	2.7	2.7	2.4	2.6	3.36	2.38	1.71	1.21	1.83	2.27	2.3	2.03	1.82	1.58	2.07	1.79	1.89	1.92	1.73	1.78	300	283	317	305	296	118	159	94	115	170	100	87	46	61	87	92	104	90	61	90	76	74	101	90
LOC105221788	0.47	0.39	0.27	0.3	0.08	0	0	0.09	0	0	0	0	0	0.11	0	0	0	0	0	0	0	0	0	0	0	7	5	4	4	1	0	0	1	0	0	0	0	0	1	0	0	0	0	0	0	0	0	0	0
LOC105221789	4.09	4.78	4.87	4.39	5.17	12.53	12.27	11.94	10.36	10.75	7.14	8.29	7.58	6.52	5.69	6.01	5.38	4.72	4.62	4.07	4.15	5.33	6.23	4.61	4.98	237	234	282	222	256	572	754	489	479	568	314	440	302	227	228	251	288	243	186	185	184	218	343	251
LOC105221790	0.1	0.09	0.13	0.13	0.14	0.18	0.33	0.09	0.23	0.33	0.22	0.37	0.17	0.28	0.3	0.62	0.45	0.47	0.55	0.93	0.79	0.91	0.81	0.79	1.14	8	6	10	9	9	11	27	5	14	23	13	26	9	13	16	34	32	32	29	56	46	49	59	57
LOC105221791	14.52	13.91	12.53	15.62	14.56	6.25	9.44	7.58	7.46	7.29	11.26	12.82	12.19	8.62	10.49	12.83	14.02	12.52	11.56	13.44	12.42	11.38	12.36	11.48	15.85	168	136	145	158	144	57	116	62	69	77	99	136	97	60	84	107	150	129	93	122	110	93	136	125
LOC105221792	0.34	0.26	0.22	0.62	0.4	0.08	0.06	0	0.03	0.11	0.11	0.07	0.29	0.1	0.14	0.11	0.15	0.18	0.32	0.1	0.08	0.06	0.02	0.04	0.08	17	11	11	27	17	3	3	0	1	5	4	3	10	3	5	4	7	8	11	4	3	2	1	2
LOC105221793	2.22	1.88	0.4	3.04	0.86	1.94	1.4	0.9	1.72	1.15	3.18	1.81	0.68	1.68	1.59	1.21	1.44	2.05	1.67	1.56	1.98	1.43	1.4	1.22	1.63	69	50	14	78	25	46	43	18	40	33	72	48	15	32	40	28	48	52	33	39	48	32	42	35
LOC105221795	1.58	1.5	1.12	0.99	0.83	2.26	2.3	1.73	1.91	2.56	2.21	3.27	3.25	2.62	2.5	3.67	5.17	4.05	2.78	3.05	4.05	4.18	3.47	3.89	4.63	31	25	22	17	14	35	48	24	30	46	33	59	44	31	34	52	94	71	38	47	61	58	65	72
LOC105221796	0	0	0	0	0	0	0	0	0	0	0	0	0	0	0	0	0	0	0	0	0	0	0	0	0	0	0	0	0	0	0	0	0	0	0	0	0	0	0	0	0	0	0	0	0	0	0	0	0
LOC105221797	0.02	0	0	0.02	0	0.02	0	0	0	0	0.04	0.11	0.07	0.06	0.05	0.07	0	0.04	0.05	0.04	0.09	0.05	0.16	0.13	0.04	1	0	0	1	0	1	0	0	0	0	2	6	3	2	2	3	0	2	2	2	4	2	9	7
LOC105221798	0	0	0	0.17	0	0	0	0.07	0	0	0	0	0	0	0	0	0	0.06	0	0	0	0	0.05	0	0	0	0	0	3	0	0	0	1	0	0	0	0	0	0	0	0	0	1	0	0	0	0	1	0
LOC105221799	23.56	24.99	24.13	23.61	23.66	19.16	20.57	15.58	18.56	19.08	29.65	28.12	30.75	29.9	31.96	33	36.84	32.87	35.51	37.33	37.6	34.86	32.09	37.92	32.23	686	615	703	601	589	440	636	321	432	507	656	751	616	524	644	693	992	852	719	853	838	717	889	1039
LOC105221800	0	0	0	0	0	0	0	0	0	0	0	0	0	0	0	0	0	0	0	0	0	0	0	0	0	0	0	0	0	0	0	0	0	0	0	0	0	0	0	0	0	0	0	0	0	0	0	0	0
LOC105221802	14.91	13.43	12.86	13.95	12.96	14.09	13.97	12.43	15.31	11.52	15.05	15.21	14.76	16.21	13.17	14.08	13.83	12.39	12.65	12.84	13.22	11.15	11.26	12.92	10.77	373	284	322	305	277	278	371	220	306	263	286	349	254	244	228	254	320	276	220	252	253	197	268	304
LOC105221803	15.47	11.86	10.87	18.24	14.58	31.01	25.74	22.76	24.66	32.76	138.3	110.44	98.85	95.5	89.31	90.98	113.53	82.79	99.89	79.7	70.84	71.57	94.29	76.99	81.39	489	317	344	504	394	773	864	509	623	945	3322	3202	2150	1817	1954	2074	3319	2330	2196	1977	1714	1598	2836	2290
LOC105221804	1460.5	1356	1255.54	1512.81	1256.17	1303.99	1140.08	1216.13	1316.65	1298.1	1118.98	1090.99	1044.82	1078.99	1120.45	966.5	960.69	1017.17	887.16	866.8	879.27	877.38	1085.73	978.2	978.1	18816	14763	16184	17036	13831	13247	15592	11081	13554	15259	10952	12889	9260	8365	9989	8978	11444	11665	7947	8761	8669	7982	13307	11856
LOC105221805	0.6	0.11	0.38	0.57	0.41	0.27	0.48	0.27	0.49	0.44	0.69	0.61	0.3	0.42	0.3	0.94	0.53	0.32	0.33	0.48	0.5	0.57	0.62	0.7	0.63	29.4	5.09	20.28	24.21	16.06	11.25	23.07	10.26	17	20.4	25.23	29.67	9	13.38	11.21	30.03	22.07	15.27	11.17	20.25	20.25	21.3	27.09	31.12
LOC105221806	32.14	32.52	32.45	33.12	33.81	10.35	11.73	10.11	10.73	10.78	13.86	12.93	12.7	15.75	12.5	15.37	14.39	15.15	15.79	16.77	17.14	17.03	17.11	19.39	19.49	1589.6	1358.91	1605.72	1431.79	1428.94	403.75	615.93	353.74	424	486.6	520.77	586.33	432	468.62	427.79	547.97	657.93	666.73	542.83	650.75	648.75	594.7	804.91	901.88
LOC105221807	4.06	4.56	5.56	4.58	4.57	7.46	7.3	9.34	9.25	8.95	9.31	8.79	9.98	8.47	8.5	8.44	9.51	9.76	8.31	7.49	8.29	6.56	8.53	8.07	8.89	78	74	107	77	75	113	149	127	142	157	136	155	132	98	113	117	169	167	111	113	122	89	156	146
LOC105221808	21.18	21.37	19.71	19.57	22.31	6.95	8.77	6.05	7.49	7.83	8.48	7.46	7.31	7.69	10.47	9.84	7.24	8.14	8.54	9.11	7.89	10.54	9.25	10.53	10.88	421	359	392	340	379	109	185	85	119	142	128	136	100	92	144	141	133	144	118	142	120	148	175	197
LOC105221809	10.12	8.83	9.53	8.94	9.61	5.49	8.46	4.96	4.61	5.24	5.48	6.16	3.6	2.64	4.98	9.88	9.91	10.35	11.17	13.08	12.53	13.88	12.31	12.67	12.31	925	676	868	720	752	395	818	319	338	432	371	512	224	144	308	652	837	835	716	927	868	889	1037	1072
LOC105221810	6.91	5.95	5.93	6.07	6.29	6.67	7.49	6.98	6.73	6.28	6.44	6.52	7.45	5.43	7.37	8.04	7.3	7.34	8.04	6.56	7.51	8.01	8.65	8.18	7.54	298	217	256	229	232	227	343	213	232	247	211	258	221	141	220	250	291	282	241	222	248	244	355	332
LOC105221811	0.07	0.13	0	0.33	0.42	0.18	0.1	0.3	0.13	0	0.09	0	0	0.06	0	0.1	0.04	0.04	0.05	0.09	0.05	0	0.23	0.08	0.05	2	3	0	8	10	4	3	6	3	0	2	0	0	1	0	2	1	1	1	2	1	0	6	2
LOC105221812	31.95	30.04	34.82	29.42	32.12	11.91	13.94	11.16	10.77	11.27	11.36	11.25	9.47	9.55	11.22	16.44	15.77	14.68	16.58	16.24	16.75	18.06	16.64	17.94	17.95	2690	2134	2937	2157	2305	783	1240	659	725	865	723	864	545	480	654	996	1228	1103	964	1072	1072	1067	1326	1416
LOC105221813	8.04	7.1	6.77	7.34	7.23	4.49	6.33	4.33	5.56	5.16	5.72	5.56	5.45	5.88	6.2	6.57	7.98	8.73	8.71	8.03	9.37	9.13	10.69	11.19	10.7	268	200	226	214	206	118	224	102	148	157	145	170	125	118	143	158	246	259	202	210	239	215	339	351
LOC105221814	5.72	5.17	5.25	5.6	4.57	4.1	3.92	3.21	4	4.26	4.66	4.56	3.78	5.31	5.23	6.17	5.56	5.67	6.51	7.12	7.95	6.3	6.6	7.12	6.82	297	227	273	254	203	168	216	118	166	202	184	217	135	166	188	231	267	262	235	290	316	231	326	348
LOC105221815	1551.19	1416.26	1361.13	1566.32	1396.56	1197.04	1085.74	1062.96	1243.44	1256.06	1088.12	1094.03	1029.96	1131.63	1103.36	971.7	959.36	986.86	886.52	903.31	922.47	913.71	1096.95	1039.01	994.19	33540	25878	29446	29603	25807	20409	24921	16255	21483	24780	17874	21692	15320	14724	16509	15149	19180	18994	13328	15323	15264	13951	22564	21135
LOC105221816	7.7	6.76	7.32	6.2	6.5	5.79	5.5	5.63	5.04	5.71	6.57	6.5	4.95	6.41	5.36	7.66	6.51	6.84	8.01	7.38	7.63	8.35	7.65	9.02	8.75	406	303	388	291	292	241	307	213	213	275	266	319	183	204	197	293	320	321	295	307	308	310	382	451
LOC105221817	0	0.12	0	0.12	0	0	0	0	0	0	0	0	0	0	0	0	0	0	0	0.13	0	0	0	0	0	0	1	0	1	0	0	0	0	0	0	0	0	0	0	0	0	0	0	0	1	0	0	0	0
LOC105221818	15.97	14.04	14.39	13.59	14.34	9.31	11.52	8.71	8.71	9.33	7.84	9.57	6.54	6.83	8.36	14.81	13.94	12.83	14.49	18.29	19.77	20.25	19.62	18.94	21.69	1290	959	1163	958	989	596	987	503	566	695	485	714	368	334	471	872	1045	929	817	1164	1232	1166	1515	1444
LOC105221819	8.98	8.91	8.27	8.92	7.99	8.82	12.24	8.9	9.75	9.02	13.16	12.63	10.88	11.56	11.39	11.91	11.62	13.31	12.35	16.05	14.21	17.34	14.49	15.45	16.1	204	171	188	177	155	158	295	143	177	187	227	263	170	158	179	195	244	269	195	286	247	278	313	330
LOC105221820	12.65	13.66	13.53	12.45	12.56	17.07	15.08	13.19	15.92	17.9	15.87	13.87	12.92	14.28	14.66	13.86	14.2	13.51	16.23	14.05	13.25	12.32	13.96	13.56	15.49	343	313	367	295	291	365	434	253	345	443	327	345	241	233	275	271	356	326	306	299	275	236	360	346
LOC105221821	13.89	12.82	12.36	13.22	13.9	15.37	16.93	14.68	17.43	17.3	15.88	16.13	16.49	14.21	14.4	14.65	15.87	15.51	16.92	14.27	15.68	15.51	17.32	16.59	16.74	463	361	412	385	396	404	599	346	464	526	402	493	378	285	332	352	489	460	392	373	400	365	549	520
LOC105221822	0.15	0	0.02	0.06	0.03	0.03	0.02	0.07	0.03	0.08	0.33	0.11	0.07	0.12	0.18	0.24	0.3	0.17	0.32	0.29	0.1	0.14	0.16	0.32	0.38	6	0	1	2	1	1	1	2	1	3	10	4	2	3	5	7	11	6	9	9	3	4	6	12
LOC105221823	0	0	0	0	0	0	0	0	0	0	0	0	0	0	0	0	0	0	0	0	0	0	0	0	0	0	0	0	0	0	0	0	0	0	0	0	0	0	0	0	0	0	0	0	0	0	0	0	0
LOC105221824	35.96	31.52	32.85	32.49	34.34	37.95	48.93	36.99	49.11	52.5	47.9	48.81	46.88	49.33	58.77	64.79	48.15	63.01	54.59	66.39	74.78	73.63	65.65	66.64	67.65	756	560	691	597	617	629	1092	550	825	1007	765	941	678	624	855	982	936	1179	798	1095	1203	1093	1313	1318
LOC105221825	6.61	8.04	5.94	7.77	7.07	6.22	6.49	4.4	9.21	6.62	5.96	4.94	4.8	5.02	6.96	7.07	4.7	6.15	5.97	6.02	6.54	6.01	3.97	5.62	4.3	70	72	63	72	64	52	73	33	78	64	48	48	35	32	51	54	46	58	44	50	53	45	40	56
LOC105221826	1.75	2.18	1.7	1.47	2.15	0.23	0.82	0.19	0.63	0.35	0.73	0.4	0.4	0.53	0.47	0.57	0.6	0.36	0.66	0.76	1.02	0.72	0.39	0.39	0.64	38	40	37	28	40	4	19	3	11	7	12	8	6	7	7	9	12	7	10	13	17	11	8	8
LOC105221827	2.45	1.54	2.03	1.77	2.03	1.09	2.27	0.88	1.26	1.39	1.06	1.36	0.69	0.66	0.75	2.3	2.43	2.07	1.97	2.28	2.77	3.42	2.92	3.04	3.5	224	122	186	144	158	81	223	59	93	118	76	114	45	36	47	153	205	174	124	166	195	223	262	261
LOC105221828	2.85	3.69	2.89	2.62	2.85	7.9	7.11	4.99	9.02	10.61	6.52	6.06	3.76	6.36	9.38	12.33	5.36	9.91	8.04	14.64	15.54	14.51	7.97	11.65	12.49	76	83	77	61	65	166	201	94	192	258	132	148	69	102	173	237	132	235	149	306	317	273	202	292
LOC105221829	0.24	0.17	0.47	0.22	0.28	0.06	0.13	0.13	0.12	0	0.06	0	0.07	0	0.07	0	0	0	0.07	0.06	0.25	0.34	0.1	0.05	0	5	3	10	4	5	1	3	2	2	0	1	0	1	0	1	0	0	0	1	1	4	5	2	1
LOC105221830	0.11	0.13	0	0	0	0.14	0.14	0.1	0	0.16	0.1	0.16	0	0.06	0.11	0.05	0	0	0.11	0	0.14	0	0.23	0.08	0	3	3	0	0	0	3	4	2	0	4	2	4	0	1	2	1	0	0	2	0	3	0	6	2
LOC105221831	0.66	0.18	0.54	0.59	0.85	1.53	1.71	1.32	1.59	1.82	1.99	2.14	1.93	2.61	2.57	2.47	2.25	1.63	2.82	3.04	3.39	2.22	2.41	2.79	2.37	22	5	18	17	24	40	60	31	42	55	50	65	44	52	59	59	69	48	65	79	86	52	76	87
LOC105221833	0	0	0	0	0	0	0	0	0	0	0.06	0.1	0	0	0	0	0	0	0	0	0	0	0	0	0	0	0	0	0	0	0	0	0	0	0	1	2	0	0	0	0	0	0	0	0	0	0	0	0
LOC105221834	0	0	0	0	0	0	0	0	0	0	0	0	0.08	0	0	0	0	0	0	0	0.15	0.08	0	0	0	0	0	0	0	0	0	0	0	0	0	0	0	1	0	0	0	0	0	0	0	2	1	0	0
LOC105221835	9.7	9.42	9.14	10.75	9.76	15.05	12.44	13.99	13.68	14.85	13.3	11.56	14.72	12.6	9.49	12.21	13.04	11.96	11.4	12.3	11.88	11.68	13.88	12.92	13.46	507	416	478	491	436	620	690	517	571	708	528	554	529	396	343	460	630	556	414	504	475	431	690	635
LOC105221836	0	0	0	0	0	0.09	0	0	0	0	0	0	0	0	0	0.07	0	0	0	0	0	0	0	0.05	0	0	0	0	0	0	3	0	0	0	0	0	0	0	0	0	2	0	0	0	0	0	0	0	2
LOC105221837	13.21	14.02	13.98	15.2	13.44	3.73	5.22	3.37	3.26	5.47	5.06	5.7	3.61	5.22	5.34	6.51	4.87	5.6	6.09	6.05	7.31	7.17	7.19	6.88	8.09	543	487	575	546	472	121	228	98	107	205	158	215	102	129	152	193	185	205	174	195	230	208	281	266
LOC105221838	99.63	99.56	101.41	115.32	97.53	66.86	68.32	67.21	66.25	62.8	108.01	92.44	108.98	97.33	94.27	103.93	110.78	100.07	94.38	87.22	85.28	90.46	113.5	88.92	87.75	3305	2791	3366	3344	2765	1749	2406	1577	1756	1901	2722	2812	2487	1943	2164	2486	3398	2955	2177	2270	2165	2119	3582	2775
LOC105221839	6.65	6.33	5.5	6.48	5.07	3.17	4.14	3.76	3.92	4.58	5.54	4.45	3.96	4.42	4.53	5.88	5.2	6.15	6.33	7.06	8.06	9.05	8.55	8.54	10.17	210	169	174	179	137	79	139	84	99	132	133	129	86	84	99	134	152	173	139	175	195	202	257	254
LOC105221840	1.64	1.44	1.68	1.71	1.71	1.4	1.56	1.58	1.11	1.27	1.63	1.19	0.68	1.21	1.42	1.84	1.56	1.88	1.66	1.97	1.94	1.92	1.45	2.04	1.9	176	130	180	160	157	118	178	120	95	124	133	117	50	78	105	142	155	179	124	166	159	145	148	206
LOC105221841	0	0	0	0	0	0	0	0	0	0	0	0	0	0	0	0	0	0	0.09	0	0.08	0	0	0	0	0	0	0	0	0	0	0	0	0	0	0	0	0	0	0	0	0	0	1	0	1	0	0	0
LOC105221842	4.26	3.86	3.01	3.8	3.52	2.79	2.96	3.08	3.48	2.86	2.54	2.54	2.42	2.57	2.17	2.13	1.48	2.04	2.47	1.55	1.98	2.11	2.08	2.25	2.37	195	150	138	152	138	100	142	98	127	121	86	108	76	72	70	69	61	82	77	56	68	67	91	96
LOC105221843	34.18	32.26	30.58	37.74	35	29.04	28.26	26.94	31.12	24.16	39.37	35.41	38.14	37.78	34.82	43.62	46.58	44.07	45.35	43.57	49.36	45.02	43.57	53.5	52.98	400	319	358	386	350	268	351	223	291	258	350	380	307	266	282	368	504	459	369	400	442	372	485	589
LOC105221844	0	0	0	0	0	0	0.04	0	0	0	0	0	0	0	0	0	0	0	0	0	0	0	0	0	0	0	0	0	0	0	0	1	0	0	0	0	0	0	0	0	0	0	0	0	0	0	0	0	0
LOC105221845	0	0	0	0	0	0	0	0	0	0	0	0	0	0	0	0	0	0	0	0	0	0	0	0	0	0	0	0	0	0	0	0	0	0	0	0	0	0	0	0	0	0	0	0	0	0	0	0	0
LOC105221846	28.84	30.46	32.34	30.56	30.71	32.17	37.11	30.96	37.08	38.66	42.29	39.12	33.11	40.15	45.29	41.54	35.99	43.68	39.41	48.97	50.69	51.13	47.25	49.6	48.61	623	556	699	577	567	548	851	473	640	762	694	775	492	522	677	647	719	840	592	830	838	780	971	1008
LOC105221847	0	0	0	0	0	0	0	0	0	0	0	0	0	0	0	0	0	0	0	0	0	0	0	0	0	0	0	0	0	0	0	0	0	0	0	0	0	0	0	0	0	0	0	0	0	0	0	0	0
LOC105221848	0	0	0	0	0	0	0	0	0	0	0	0	0	0	0	0	0	0	0	0	0	0	0	0	0	0	0	0	0	0	0	0	0	0	0	0	0	0	0	0	0	0	0	0	0	0	0	0	0
LOC105221849	0.54	0.61	0.74	0.57	0.45	0.94	0.78	0.45	0.53	0.88	0.77	0.65	0.43	0.61	0.54	0.59	0.54	0.62	0.48	0.49	0.41	0.76	0.48	0.39	0.54	29	28	40	27	21	40	45	17	23	44	32	32	16	20	20	23	27	30	18	21	17	29	25	20
LOC105221850	23.13	20.65	22.68	23.66	21.62	25.64	28.1	26.56	28.05	30.65	28.69	30.5	30.29	30.81	28.45	29.5	27.8	30.13	25.86	31.14	29.57	32.14	31.38	27.42	31.81	746	563	732	667	596	652	962	606	723	902	703	902	672	598	635	686	829	865	580	788	730	732	963	832
LOC105221851	1.16	0.77	0.51	0.64	0.6	61.85	51.11	51.34	45.85	51.06	48.9	51.51	51.09	48.05	39.77	54.1	72	59.64	71.01	61.69	65.31	65.44	73.06	62.41	66.41	25	14	11	12	11	1049	1167	781	788	1002	799	1016	756	622	592	839	1432	1142	1062	1041	1075	994	1495	1263
LOC105221852	0.07	0	0	1.37	0	0	0	0	0	0	0	0.07	0	0	0	0	0	0	0	0	0	0	0	0	0	1	0	0	18	0	0	0	0	0	0	0	1	0	0	0	0	0	0	0	0	0	0	0	0
LOC105221853	0.22	0	0	3.97	0	0	0.62	0.11	0.09	0	0	0	0.11	0	0.11	0	0	0	0	0	0.48	0.21	0.08	0.08	0.09	3	0	0	47	0	0	9	1	1	0	0	0	1	0	1	0	0	0	0	0	5	2	1	1
LOC105221854	8.53	7.34	9.57	8.05	7.51	5.02	6.65	5.46	5.87	5.61	8.64	9.09	6.44	7.64	8.66	13.9	12.73	12.61	14.04	13.41	16.16	15.8	12.92	15.84	16.6	360	262	404	297	271	167	298	163	198	216	277	352	187	194	253	423	497	474	412	444	522	471	519	629
LOC105221855	32.33	32.42	31.31	32.58	33.14	41.46	47.72	38.78	42.35	44.48	49.47	52.51	38.79	46.26	54.83	65.6	60.62	62.26	60.76	73.02	78.18	77.69	67.34	73.75	77.3	2222	1881	2153	1962	1953	2227	3452	1873	2307	2758	2556	3276	1824	1890	2574	3222	3817	3774	2883	3898	4078	3751	4369	4722
LOC105221856	21.8	18.76	18.91	19.73	20.74	3.97	6.24	4.17	4.23	4.88	7.31	7.13	6.08	5.85	6.9	10.36	10.08	9.86	9.23	10.98	10.93	11.52	12.56	13.99	12.92	954	694	828	755	776	137	290	129	148	195	243	286	183	154	209	327	408	384	281	377	366	356	523	576
LOC105221857	0	0	0	0	0	0	0	0	0	0	0	0	0	0	0	0	0	0	0	0	0	0	0	0	0	0	0	0	0	0	0	0	0	0	0	0	0	0	0	0	0	0	0	0	0	0	0	0	0
LOC105221858	0	0	0	0	0	0	0	0	0	0	0	0	0	0	0	0	0	0	0	0	0	0	0	0	0	0	0	0	0	0	0	0	0	0	0	0	0	0	0	0	0	0	0	0	0	0	0	0	0
LOC105221859	0	0	0.03	0	0	0.02	0	0.02	0	0	0	0.09	0.04	0.07	0	0.02	0.01	0.05	0.02	0	0	0	0.01	0	0	0	0	2	0	0	1	0	1	0	0	0	6	2	3	0	1	1	3	1	0	0	0	1	0
LOC105221860	1.71	1.84	0.16	7.9	0	2.66	0.22	0.66	14.86	6.72	1.02	0.17	0.23	0.9	1.57	0.54	2.27	10.38	1	0.59	0.81	0.22	0	0.74	5.6	22	20	2	89	0	27	3	6	153	79	10	2	2	7	14	5	27	119	9	6	8	2	0	9
LOC105221861	0	0	0	0	0	0	0	0	0	0	0	0	0	0	0	0	0	0	0	0	0	0	0	0	0	0	0	0	0	0	0	0	0	0	0	0	0	0	0	0	0	0	0	0	0	0	0	0	0
LOC105221862	0.69	0	1.11	0.59	0.6	0.54	1.21	0.48	0.54	1.6	0.56	0.28	0.62	1.28	1.12	0.71	0.83	0.58	0.49	0.66	0.56	0.36	1.08	0.55	1.84	8	0	13	6	6	5	15	4	5	17	5	3	5	9	9	6	9	6	4	6	5	3	12	6
LOC105221863	0	0	0	0	0	0	0	0	0	0	0	0	0	0	0	0	0	0	0	0	0	0	0	0	0	0	0	0	0	0	0	0	0	0	0	0	0	0	0	0	0	0	0	0	0	0	0	0	0
LOC105221864	0.48	0.09	1.6	2.2	0.09	2.24	1.89	0.79	2.81	2.55	4.12	6.56	2.68	9.86	2.32	2	3.99	6.76	3.81	21.77	4.51	3.75	7.75	2.47	6.7	6	1	20	24	1	22	25	7	28	29	39	75	23	74	20	18	46	75	33	213	43	33	92	29
LOC105221865	0.25	0.1	1.36	0.78	0.1	2.15	0.64	0	2.33	1.11	0.89	3.42	0.49	2.82	1.84	0.24	0.28	1.81	1.22	2.49	0.22	0.36	3.83	0	0.64	3	1	16	8	1	20	8	0	22	12	8	37	4	20	15	2	3	19	10	23	2	3	43	0
LOC105221866	0.36	0.11	0.27	72.5	0.1	0	0.33	0.13	1	0.29	0	0.39	0.9	0.15	0.64	0.62	0.38	0.6	0.77	1.59	0.46	1.13	0.37	0.47	1.57	4	1	3	713	1	0	4	1	9	3	0	4	7	1	5	5	4	6	6	14	4	9	4	5
LOC105221867	0.57	0.5	0.21	0.16	0	19.22	28.15	16.72	57.25	77.54	34.58	26.95	19.46	43.42	72.15	38.89	6.05	33.81	20.47	47.03	46.45	39.91	37	40.35	41.75	8	6	3	2	0	214	422	167	646	999	371	349	189	369	705	396	79	425	201	521	502	398	497	536
LOC105221868	0	0.09	0	0	0	0.39	0	0	0	0	0	0	0	0	0	0.11	0	0	0	0.1	0	0	0.08	0	0	0	1	0	0	0	4	0	0	0	0	0	0	0	0	0	1	0	0	0	1	0	0	1	0
LOC105221869	0.19	0.22	0	0	0.43	0.12	0	0.13	0.23	0.51	0.12	0.1	0	0	0	0.26	0	0	1.73	0	1.33	0.79	0	0	0.35	2	2	0	0	4	1	0	1	2	5	1	1	0	0	0	2	0	0	13	0	11	6	0	0
LOC105221870	0	0	0	0	0	0	0	0	0	0	0	0	0	0	0	0	0	0	0	0.06	0	0	0.05	0	0	0	0	0	0	0	0	0	0	0	0	0	0	0	0	0	0	0	0	0	1	0	0	1	0
LOC105221871	3.78	2.74	2.45	3.29	3.64	2.39	2.53	1.47	2.13	1.76	2.55	3.09	3.43	2.67	3.96	4.71	4.7	4.03	3.8	3.91	4.99	5.61	5.06	4.31	5.43	80	49	52	61	66	40	57	22	36	34	41	60	50	34	58	72	92	76	56	65	81	84	102	86
LOC105221872	2.05	2.3	2.12	2.12	2.21	1.34	1.4	1.05	1.3	1.22	2.07	1.89	1.36	1.67	1.81	1.71	1.81	1.9	1.85	2.68	2.51	2.2	2.37	2.01	2.03	116	110	120	105	107	60	84	42	59	63	89	98	53	57	71	70	95	96	73	119	109	88	128	107
LOC105221873	0	0	0	0	0	0	0	0	0	0	0	0	0	0	0.08	0	0	0.06	0	0	0	0	0	0	0	0	0	0	0	0	0	0	0	0	0	0	0	0	0	1	0	0	1	0	0	0	0	0	0
LOC105221874	0.42	0.99	0.94	0.93	0.83	0.58	0.55	0.69	0.59	0.62	0.87	0.74	0.66	1.04	0.77	0.72	0.76	1.02	0.75	0.88	0.92	0.62	0.63	0.7	0.64	27	53	60	52	45	29	37	31	30	36	42	43	29	40	34	33	45	58	33	44	45	28	38	42
LOC105221875	0.53	0.46	0.72	0.54	0.42	0.32	0.18	0.24	0.14	0.3	0.18	0.03	0.12	0.14	0.08	0.15	0.15	0.19	0.2	0.07	0.36	0.08	0.41	0.3	0.18	19	14	26	17	13	9	7	6	4	10	5	1	3	3	2	4	5	6	5	2	10	2	14	10
LOC105221876	0.41	0.61	1.23	0.24	0.84	1.43	1.16	0.15	0.64	0.34	0.27	1.46	0.15	0	0.15	1	1.33	0.46	1.03	0.79	0.94	0.58	0.76	0.22	0.78	4	5	12	2	7	11	12	1	5	3	2	13	1	0	1	7	12	4	7	6	7	4	7	2
LOC105221877	54.02	52.73	50.8	53.8	51.6	61.24	61.3	62.83	65.46	71.69	63.66	62.65	56.67	63.52	62.21	57.87	52.3	59.41	59.08	64.67	67.93	66.66	65.9	64.91	67.39	2267	1882	2156	2006	1865	2082	2807	1942	2254	2821	2079	2449	1686	1649	1821	1754	2059	2262	1747	2168	2187	1985	2658	2582
LOC105221878	0	0.06	0	0	0	0	0.02	0	0.03	0	0	0	0.03	0	0	0.03	0.03	0	0	0	0	0.1	0	0	0.06	0	2	0	0	0	0	1	0	1	0	0	0	1	0	0	1	1	0	0	0	0	3	0	0
LOC105221880	50.72	50.57	51.45	56.12	53.24	64.07	55.15	64.18	60.98	58.56	45.95	46.9	47.6	46.44	46.39	38.48	40.23	40.6	41.83	37.86	37.45	37.91	42.88	40.79	39.97	2768	2332	2809	2677	2483	2757	3195	2477	2659	2916	1905	2347	1787	1525	1752	1514	2030	1972	1587	1621	1564	1461	2226	2094
LOC105221881	0.91	0.63	0.96	0.74	0.81	0.55	0.5	0.26	0.54	0.45	0.76	1.1	0.97	0.53	1.01	0.96	0.7	0.88	1.06	0.94	1.11	0.81	1.04	1.37	0.79	39	23	42	28	30	19	23	8	18	18	25	44	29	14	30	30	28	34	32	32	37	25	43	56
LOC105221882	11.13	12.15	12.73	9.47	10.46	8.12	8.15	6.88	5.42	5.3	4.48	5.32	4.55	4.6	5.42	7.14	6.7	7.54	7.35	6.55	6.98	7.13	5.91	6.71	7.42	654	599	750	482	524	371	511	282	253	289	199	282	183	162	219	302	364	397	307	313	319	295	338	370
LOC105221883	0	0	0	0	0	0	0	0	0	0	0	0	0	0	0	0	0	0	0	0	0	0	0	0	0	0	0	0	0	0	0	0	0	0	0	0	0	0	0	0	0	0	0	0	0	0	0	0	0
LOC105221884	0	0	0	0	0	0	0	0	0	0	0	0	0	0	0	0	0	0	0	0	0	0	0	0	0	0	0	0	0	0	0	0	0	0	0	0	0	0	0	0	0	0	0	0	0	0	0	0	0
LOC105221885	1.56	1.22	1.01	1.32	1.03	1.02	1.06	1.07	1.09	1.43	1.12	1.23	1.17	1.5	1.49	1.09	1.08	1.3	1.39	2.11	1.45	1.84	1.69	1.73	1.79	97	64	63	72	55	50	70	47	54	81	53	70	50	56	64	49	62	72	60	103	69	81	100	101
LOC105221886	0	0	0	0	0.03	0	0	0	0	0	0	0	0	0	0	0	0.06	0.03	0	0	0	0	0	0.03	0	0	0	0	0	1	0	0	0	0	0	0	0	0	0	0	0	2	1	0	0	0	0	0	1
LOC105221887	0	0	0	0	0	0	0	0	0	0	0	0	0	0	0	0	0	0	0	0	0	0	0	0	0	0	0	0	0	0	0	0	0	0	0	0	0	0	0	0	0	0	0	0	0	0	0	0	0
LOC105221889	0	0	0	0	0	0	0	0	0	0	0	0	0	0	0	0	0	0	0	0	0.04	0	0	0	0	0	0	0	0	0	0	0	0	0	0	0	0	0	0	0	0	0	0	0	0	1	0	0	0
LOC105221890	0.06	0	0	0	0	0	0	0	0.07	0	0	0	0	0.05	0	0	0	0	0	0	0	0.08	0	0	0	2	0	0	0	0	0	0	0	2	0	0	0	0	1	0	0	0	0	0	0	0	2	0	0
LOC105221891	0	0.01	0	0	0	0	0.01	0	0	0.03	0.04	0	0	0	0	0	0	0	0.02	0	0	0	0	0	0.01	0	1	0	0	0	0	1	0	0	3	4	0	0	0	0	0	0	0	2	0	0	0	0	0
LOC105221892	0.57	0.57	0.84	0.7	0.89	0.43	0.48	0.42	0.32	0.37	0.36	0.28	0.25	0.28	0.58	0.47	0.48	0.45	0.49	0.54	0.36	0.33	0.29	0.47	0.24	27	23	40	29	36	16	24	14	12	16	13	12	8	8	19	16	21	19	16	20	13	11	13	21
LOC105221893	27.32	17.56	24.52	22.35	20.28	29.62	26.43	21.81	38.61	23.99	26.68	25.47	22.42	21.73	36.3	24.24	28.6	22.28	30.63	24.72	26.87	19.35	30.27	24.2	25.28	186	101	167	133	118	159	191	105	210	149	138	159	105	89	171	119	180	135	145	132	140	93	196	155
LOC105221894	0	0	0	0	0	0	0	0	0	0.03	0	0.03	0	0	0	0.07	0.04	0	0	0.02	0.02	0.02	0	0	0.02	0	0	0	0	0	0	0	0	0	2	0	2	0	0	0	4	3	0	0	1	1	1	0	0
LOC105221895	1.59	1.71	2.08	1.57	1.58	1.72	0.94	1.19	1.07	0.69	1.03	0.61	0.54	1.14	1.04	1.11	1.28	1	0.95	1.37	0.9	0.97	1.31	1.28	1.29	86	78	112	74	73	73	54	46	46	34	42	30	20	37	39	43	64	48	36	58	37	37	67	65
LOC105221896	0.08	0.03	0.24	0.22	0	0	0.03	0	0	0.09	0	0.03	0	0	0.04	0.04	0	0.09	0.04	0.03	0	0	0	0.06	0	3	1	9	7	0	0	1	0	0	3	0	1	0	0	1	1	0	3	1	1	0	0	0	2
LOC105221897	0	0	0	0	0	0.02	0	0	0.02	0	0	0	0	0	0	0	0.02	0	0.04	0	0.04	0.06	0.11	0	0.15	0	0	0	0	0	1	0	0	1	0	0	0	0	0	0	0	1	0	2	0	2	3	7	0
LOC105221898	0	0	0	0	0	0	0	0	0	0	0	0	0	0	0	0	0	0	0	0	0	0	0	0	0	0	0	0	0	0	0	0	0	0	0	0	0	0	0	0	0	0	0	0	0	0	0	0	0
LOC105221899	0.45	0.55	0.57	0.82	0.59	0.4	0.4	0.32	0.3	0.33	0.09	0.2	0.21	0.31	0.17	0.31	0.27	0.13	0.1	0.22	0.43	0.24	0.32	0.35	0.3	34	35	43	54	38	24	32	17	18	23	5	14	11	14	9	17	19	9	5	13	25	13	23	25
LOC105221900	10.54	8.9	8.12	7.32	7.99	12.39	8.63	9.41	13.52	7.29	4.89	3.68	3.77	6.32	5.99	2.16	2.43	1.36	1.49	0.77	1.02	0.86	0.91	0.92	0.77	122	87	94	74	79	113	106	77	125	77	43	39	30	44	48	18	26	14	12	7	9	7	10	10
LOC105221901	0.17	0	0	0.1	0.1	2.28	0.97	1.21	0.86	1.22	0.23	0.19	1.37	1.42	0.5	0	0.56	0.1	0.25	0.11	0.11	0	0.36	0.18	0.33	2	0	0	1	1	21	12	10	8	13	2	2	11	10	4	0	6	1	2	1	1	0	4	2
LOC105221902	2.59	2.12	2.03	3.24	1.66	4.6	4.62	3.73	2.95	3.51	2.79	3.96	4.18	6.42	3.95	4.19	3.82	3.71	4.34	2.04	3.94	3.81	4.21	4.11	3.1	55	38	43	60	30	77	104	56	50	68	45	77	61	82	58	64	75	70	64	34	64	57	85	82
LOC105221903	9.22	8.95	8.55	10.77	9.93	7.89	8.6	6.71	7.23	7.42	6.21	7.18	4.49	5.39	6.26	8.73	8.15	7.76	7.61	7.92	8.25	8.56	8.26	8.61	9.55	913	749	847	932	840	616	904	470	572	670	467	652	306	321	429	623	746	684	524	615	625	598	778	802
LOC105221904	0.08	0.01	0.06	0.06	0.03	0.07	0.03	0.07	0.06	0.03	0.04	0.07	0.03	0.04	0.05	0.09	0.11	0.15	0.05	0.09	0.11	0.11	0.08	0.16	0.05	13	1	9	9	4	9	5	8	8	4	5	11	3	4	6	10	16	21	6	11	13	12	13	24
LOC105221905	7.8	8.46	7.58	8.29	8.66	8.37	8.02	7.6	8.46	8.44	7.26	6.36	7.48	8.24	6.53	7.77	6.19	6.11	5.57	5.73	6.36	6.6	6.96	7.4	6.1	338	310	329	314	321	286	369	233	293	334	239	253	223	215	196	243	248	236	168	195	211	202	287	302
LOC105221906	18.22	20.1	19.44	19.12	16.91	19.24	19.52	20.05	18.86	21.25	16.86	16.47	18.12	18.84	16.98	17.38	17.74	16.2	17.44	15.37	17.27	17.8	18.5	17.91	17.64	532	496	568	488	422	443	605	414	440	566	374	441	364	331	343	366	479	421	354	352	386	367	514	492
LOC105221907	1.12	1.05	1.01	1.08	0.93	1.3	2.05	1.26	1.57	1.74	2.05	1.86	2.05	1.88	2.23	2.56	2.35	2.15	2.63	3.24	2.77	2.65	2.3	2.67	2.19	82	65	74	69	58	75	159	65	92	116	114	125	103	83	113	135	159	140	134	186	155	137	160	184
LOC105221908	9.97	10.42	10.6	9.84	10.44	9.35	10.37	11.19	10.5	10.45	13.44	12.83	12.27	12.82	11.6	17.01	15.18	14.26	16	15.44	15.47	15.15	15.59	16.05	16.6	925	817	985	800	829	684	1022	735	778	884	947	1091	783	715	744	1138	1302	1178	1032	1124	1098	992	1375	1400
LOC105221909	0.34	0.3	0.09	0.05	0.1	0.11	0.24	0.12	0.05	0.09	0.06	0	0.06	0.07	0.06	0	0	0	0.06	0	0.06	0	0.05	0	0	8	6	2	1	2	2	6	2	1	2	1	0	1	1	1	0	0	0	1	0	1	0	1	0
LOC105221910	1.32	0.63	1.69	0.42	1.3	4.29	2.49	3.21	2.45	3.3	2.5	3.17	3.15	2.37	2.29	2.86	2.51	2.2	2.66	1.95	2.62	2.92	3.11	1.24	2.34	25	10	32	7	21	64	50	43	37	57	36	55	41	27	30	39	44	37	35	29	38	39	56	22
LOC105221911	11.42	12.8	11.35	11.56	10.16	9.63	10.76	9.94	8.82	11.09	10.12	10.4	10.68	10.82	10.57	9.61	9.58	11.24	11.11	11.89	12.08	12.48	11.79	12.55	14.3	464	440	463	412	350	310	464	286	287	410	312	388	299	263	299	281	359	406	314	379	375	357	452	479
LOC105221912	0.23	0.37	0.23	0.36	0.24	0.26	0.29	0.37	0.37	0.34	0.3	0.55	0.4	0.37	0.43	0.51	0.75	0.45	0.92	0.64	0.84	0.93	0.46	0.77	0.79	13	18	13	18	12	12	18	15	17	18	13	29	16	13	17	21	40	23	37	29	37	38	25	42
LOC105221913	39.53	34.74	36.24	36.94	35.21	27.61	29.22	36.77	32.45	33.19	32.05	27.94	29.4	30.03	26.84	34.68	34.09	32.07	35.13	32.71	36.65	35.52	37.75	36.08	33.34	1026	762	941	838	781	565	805	675	673	786	632	665	525	469	482	649	818	741	634	666	728	651	932	881
LOC105221915	67.26	67.17	56.83	69.93	61.85	62.21	63.54	64.5	73.48	69.03	61.02	55.11	51.32	62.52	68.2	59.78	52.15	57.71	54.38	58.97	52.44	55.65	54.3	55.99	55.71	724	611	612	658	569	528	726	491	632	678	499	544	380	405	508	464	519	553	407	498	432	423	556	567
LOC105221916	0	0	0	0	0	0	0	0	0	0	0	0	0	0	0	0	0	0.08	0	0	0	0	0	0	0	0	0	0	0	0	0	0	0	0	0	0	0	0	0	0	0	0	1	0	0	0	0	0	0
LOC105221917	0.17	0.2	0.04	0.15	0.15	1.35	3.34	1.57	1.76	2.2	7.24	5.63	3.6	5.25	5.49	7.63	8.07	10.78	10.92	10.49	11.82	12.57	14.3	13.29	16.35	4	4	1	3	3	25	83	26	33	47	129	121	58	74	89	129	175	225	178	193	212	208	319	293
LOC105221918	0	0	0.03	0.04	0.08	0	0.16	0	0.04	0	0	0	0	0	0	0	0	0	0	0	0	0	0	0	0	0	0	1	1	2	0	5	0	1	0	0	0	0	0	0	0	0	0	0	0	0	0	0	0
LOC105221919	0.21	0.75	0.21	0.12	0	2.02	1.1	0.75	0.66	0.81	0.56	0.81	0.46	0.88	0.46	0.15	1.26	0.84	0.61	0.41	0.97	1.35	0.89	0.56	0.27	2	6	2	1	0	15	11	5	5	7	4	7	3	5	3	1	11	7	4	3	7	9	8	5
LOC105221920	0.1	0.06	0.05	0.12	0.04	0.33	0.43	0.34	0.1	0.33	1.3	0.77	1.08	1.6	0.65	0.92	0.99	0.66	0.99	1.43	1.85	0.63	1.35	0.4	1.28	3	1	1	3	1	6	12	7	2	8	23	17	17	24	11	18	22	17	19	29	39	13	33	9
LOC105221921	0.04	0	0	0.23	0.09	0	0	0	0	0	0.05	0	0	0	0	0.05	0.17	0.09	0	0	0	0	0.04	0	0.1	1	0	0	5	2	0	0	0	0	0	1	0	0	0	0	1	4	2	0	0	0	0	1	0
LOC105221922	3.79	4.2	4.33	3.55	3.57	2.75	2.55	2.27	2.83	2.54	1.74	2.13	2.24	2.04	2.2	2.93	4.18	2.68	3.22	3.17	3.82	3.26	3.82	3.12	3.55	286	267	326	232	231	163	204	120	171	174	99	147	115	92	115	158	290	181	173	187	224	172	273	222
LOC105221923	0	0.04	0	0	0	0	0	0	0	0	0	0	0	0	0	0	0	0	0	0	0.09	0	0	0	0	0	1	0	0	0	0	0	0	0	0	0	0	0	0	0	0	0	0	0	0	2	0	0	0
LOC105221924	0.04	0	0	0	0	0	0.07	0.06	0	0	0	0	0	0	0	0	0.04	0	0	0	0	0	0	0	0	1	0	0	0	0	0	2	1	0	0	0	0	0	0	0	0	1	0	0	0	0	0	0	0
LOC105221925	0	0	0	0	0	0	0	0	0	0	0	0	0	0	0	0	0	0	0	0	0	0	0	0	0	0	0	0	0	0	0	0	0	0	0	0	0	0	0	0	0	0	0	0	0	0	0	0	0
LOC105221926	0	0.04	0.14	0.08	0.48	0.09	0	0	0	0	0.13	0.04	0.15	0	0.05	0	0.07	0.15	0.1	0	0.13	0	0.07	0	0.17	0	1	4	2	12	2	0	0	0	0	3	1	3	0	1	0	2	4	2	0	3	0	2	0
LOC105221927	0	0	0	0	0	0.03	0	0	0	0	0	0	0	0	0	0	0	0	0	0	0	0	0	0	0	0	0	0	0	0	1	0	0	0	0	0	0	0	0	0	0	0	0	0	0	0	0	0	0
LOC105221928	0.55	0.83	0.8	0.57	0.76	44.11	30.54	36.81	44.28	34.43	9	7.62	8.18	9.52	8.57	7.04	6.9	6.49	9.25	6.15	5.78	6.12	7.08	6.3	4.96	11	14	16	10	13	692	645	518	704	625	136	139	112	114	118	101	127	115	128	96	88	86	134	118
LOC105221929	0.04	0	0	0	0.05	0	0	0	0	0	0	0	0	0.07	0	0	0	0.05	0.06	0	0	0	0	0	0	1	0	0	0	1	0	0	0	0	0	0	0	0	1	0	0	0	1	1	0	0	0	0	0
LOC105221930	0.07	0.02	0.01	0	0	0.02	0	0	0.02	0	0	0	0	0	0	0.04	0	0	0	0	0	0	0	0.01	0	5	1	1	0	0	1	0	0	1	0	0	0	0	0	0	2	0	0	0	0	0	0	0	1
LOC105221931	0.91	0.47	0.67	0.66	1.32	0.73	0.37	0.3	0.76	0.6	0.48	0.66	0.4	0.3	1.19	0.89	0.59	0.99	0.92	0.47	0.92	0.43	1.03	0.62	1.31	30	13	22	19	37	19	13	7	20	18	12	20	9	6	27	21	18	29	21	12	23	10	32	19
LOC105221932	0.07	0.03	0.04	0.04	0.01	1.5	0.56	1.21	1.9	1.77	0.26	0.04	0.04	0.22	0.26	0.2	0.07	0.11	0.09	0.2	0.14	0.28	0.12	0.06	0.17	6	2	3	3	1	97	49	70	124	132	16	3	2	11	15	12	5	8	5	13	9	16	9	5
LOC105221933	0	0	0	0	0	0	0	0	0	0	0	0	0	0	0	0.07	0	0.06	0	0	0.13	0	0	0	0	0	0	0	0	0	0	0	0	0	0	0	0	0	0	0	1	0	1	0	0	2	0	0	0
LOC105221934	8.77	8.33	8.01	8.44	7.44	5.68	6.53	5.47	5.14	5.82	6.3	6.7	5.36	5.41	6.24	8.98	8.41	9.83	9.33	10.79	14.07	13.96	12.76	13.26	15.95	891	715	814	750	646	455	704	393	417	540	486	624	375	331	439	658	790	889	659	860	1094	1002	1234	1268
LOC105221935	0	0	0	0	0	0	0	0	0	0	0	0	0	0	0	0	0	0	0	0	0	0	0	0	0	0	0	0	0	0	0	0	0	0	0	0	0	0	0	0	0	0	0	0	0	0	0	0	0
LOC105221936	0	0	0	0	0	0	0	0	0	0	0	0	0	0	0	0	0	0	0	0	0	0	0	0	0	0	0	0	0	0	0	0	0	0	0	0	0	0	0	0	0	0	0	0	0	0	0	0	0
LOC105221937	0	0	0	0.04	0	0.04	0	0	0.04	0.17	0.08	0.03	0.09	0.05	0.05	0.09	0.07	0.11	0	0.29	0.29	0.13	0.13	0.15	0.21	0	0	0	1	0	1	0	0	1	5	2	1	2	1	1	2	2	3	0	9	8	3	4	5
LOC105221938	0	0	0	0	0	0.03	0	0	0	0	0	0	0	0	0.1	0	0	0	0	0.03	0	0	0.05	0.02	0	0	0	0	0	0	1	0	0	0	0	0	0	0	0	3	0	0	0	0	1	0	0	2	1
LOC105221939	0	0	0	0	0	0	0	0	0	0	0	0	0	0	0	0	0	0	0	0	0	0	0	0	0	0	0	0	0	0	0	0	0	0	0	0	0	0	0	0	0	0	0	0	0	0	0	0	0
LOC105221940	3.81	4.33	3.62	3.87	3.67	7.64	8.81	7.8	6.98	7.67	6.63	6.57	7.2	6.8	6.1	5.92	6.28	5.76	6.46	6.38	5.73	5.94	5.78	5.44	5.75	544	522	517	483	447	860	1334	787	796	999	719	859	707	584	602	609	829	731	641	714	626	598	785	730
LOC105221941	0.49	0.37	0.2	0.46	0.39	0.74	0.36	0.36	0.53	0.72	0.34	0.4	0.08	0.3	0.16	1.17	0.48	0.33	1.11	0.49	0.41	0.23	0.29	0.18	0.28	27	17	11	22	18	32	21	14	23	36	14	20	3	10	6	46	24	16	42	21	17	9	15	9
LOC105221942	0	0	0	0.21	0	0	0.09	0	0	0.1	0.12	0.1	0	0.31	0	0	0	0	0	0.12	0	0	0.1	0	0.12	0	0	0	2	0	0	1	0	0	1	1	1	0	2	0	0	0	0	0	1	0	0	1	0
LOC105221943	2.79	1.9	2.15	2.85	2.68	4.54	3.9	3.04	4.11	4.75	3.23	2.95	2.61	3.9	2.93	4.94	2.59	3.66	3.78	4.41	4.68	3.41	3.78	4.03	4.18	198	114	151	175	163	254	296	152	231	308	174	191	127	165	144	254	170	232	188	247	252	169	257	268
LOC105221944	0.29	0.16	0.31	0.2	0.48	0.61	1.09	0.36	0.59	0.65	0.76	0.88	0.53	0.62	0.65	1.49	0.99	1.05	1.26	1.79	1.19	1.18	0.79	1.16	0.95	27	13	29	16	38	45	108	24	44	55	54	75	34	35	42	100	85	87	82	131	85	78	70	102
LOC105221945	4.58	3.48	1.88	6.41	4	6.76	4.38	1.79	3.76	9.36	8.86	4.84	1.74	6.3	4.59	5.02	2.92	5.14	5.75	5.83	6.92	2.9	4.85	4.03	4.54	134	86	55	164	100	156	136	37	88	250	197	130	35	111	93	106	79	134	117	134	155	60	135	111
LOC105221946	3.8	3.73	3.46	3.41	3.66	3.72	3.77	4.51	4.53	3.96	3.96	3.68	4.86	3.76	3.67	4.5	4.37	4.1	4.39	4.16	4.04	5.16	4.04	4.79	4.45	138	118	124	110	112	111	149	121	135	127	112	126	123	82	92	121	153	138	115	123	110	129	146	165
LOC105221947	0.69	0.48	0.53	0.55	0.65	0.32	0.41	0.52	0.67	0.68	0.28	0.27	0.35	0.3	0.29	0.51	0.52	0.47	0.44	0.41	0.41	0.3	0.33	0.26	0.3	66	39	51	46	53	24	42	35	51	59	20	24	23	17	19	35	46	40	29	31	30	20	30	23
LOC105221948	0.06	0	0.17	0.13	0	0.14	0.05	0	0.07	0.06	0	0.12	0.17	0	0	0	0	0.19	0	0	0.07	0	0.12	0	0.14	1	0	3	2	0	2	1	0	1	1	0	2	2	0	0	0	0	3	0	0	1	0	2	0
LOC105221949	0.24	0.29	0.27	0.09	0.13	0.17	0.2	0.5	0.03	0.18	0.36	0.3	0.04	0.32	0.2	0.49	0.5	0.61	0.35	0.31	0.21	0.42	0.49	0.32	0.48	9	9	10	3	4	5	8	13	1	6	10	10	1	7	5	13	17	20	9	9	6	11	17	11
LOC105221950	31.99	26.78	25.54	26.16	27.56	22.67	24.36	24.52	24.1	28.34	32.42	30.87	28.11	28.05	33.6	31.18	32.69	33.7	40.06	35.01	33.89	41.4	29.84	33.85	36.69	417	295	333	298	307	233	337	226	251	337	321	369	252	220	303	293	394	391	363	358	338	381	370	415
LOC105221952	6.03	5.95	2.13	7.78	4.85	3.26	2.77	1.54	3.98	2.47	4.34	2.54	1.52	3.27	2.38	3.23	1.83	4.25	2.95	3.64	6.1	2.73	3.17	2.65	4.43	150	125	53	169	103	64	73	27	79	56	82	58	26	49	41	58	42	94	51	71	116	48	75	62
LOC105221953	0	0	0	0	0	0	0	0	0	0	0	0	0	0	0	0	0	0	0	0	0	0	0	0	0	0	0	0	0	0	0	0	0	0	0	0	0	0	0	0	0	0	0	0	0	0	0	0	0
LOC105221954	8.07	6.07	8.49	7.29	8.83	1.42	1.48	1.5	1.19	1.17	1.26	1.5	1.33	1.35	1.22	1.04	1.67	1.18	1.92	1.76	1.32	1.04	1.18	1.36	1.34	784	498	825	619	733	109	153	103	92	104	93	134	89	79	82	73	150	102	130	134	98	71	109	124
LOC105221955	8.5	7.74	8.85	7.55	7.93	15.46	15.94	14.65	16.49	15.09	18.81	15.67	19.82	16.1	17.7	17.73	18.41	18.74	16.87	18.03	16.62	16.3	18.12	16.64	17.12	429	330	447	333	342	615	854	523	665	695	721	725	688	489	618	645	859	842	592	714	642	581	870	790
LOC105221956	8.04	6.7	5.66	8.55	7.95	14.07	9.17	15.21	14.74	8.81	9.09	9.26	9.05	8.09	15.22	10.99	10.78	7	7.82	9.38	9.02	7.54	6.43	9.27	4.87	71	50	50	66	60	98	86	95	104	71	61	75	55	43	93	70	88	55	48	65	61	47	54	77
LOC105221960	0	0	0	0	0	0.04	0	0	0	0	0	0	0	0	0	0.04	0.03	0	0	0	0	0	0	0	0	0	0	0	0	0	1	0	0	0	0	0	0	0	0	0	1	1	0	0	0	0	0	0	0
LOC105221962	0	0	0	0.08	0	0	0	0	0	0	0	0	0	0	0.1	0	0	0	0	0	0	0	0	0	0	0	0	0	1	0	0	0	0	0	0	0	0	0	0	1	0	0	0	0	0	0	0	0	0
LOC105221963	1.03	9.42	1.67	1.66	8.73	5.6	10.74	2.88	3.08	24.32	0.03	0.06	0.12	0.09	0	0	0.11	0.15	0.61	0	0.62	0.11	0.14	0	0	39	301	63	55	282	167	431	77	93	839	1	2	3	2	0	0	4	5	16	0	18	3	5	0
LOC105221964	8.1	7.35	6.97	7.94	7.33	13.64	11.19	12.64	11.84	12.81	12.19	14.16	15.31	14.14	14.11	16.08	15.54	15.38	14.8	17	14.64	15.42	14.35	16.88	14.79	433	332	373	371	335	575	635	478	506	625	495	694	563	455	522	620	768	732	550	713	599	582	730	849
LOC105221965	47.36	36.11	41.25	42.99	41.17	24.4	26.73	20.52	26.68	29.47	19.62	20	14.13	20.13	22.28	20.13	18.99	20.53	18.64	25.02	27.94	28.08	24.04	23.49	25.66	731	471	637	580	543	297	438	224	329	415	230	283	150	187	238	224	271	282	200	303	330	306	353	341
LOC105221966	496.27	517.37	518.54	486.81	501.64	479.4	489.71	568.48	459.6	469.78	568.49	610.22	612.45	575.86	586.36	678.13	670.42	641.72	655.84	652.88	671.1	661.25	622.79	660.91	652.55	11931	10511	12473	10230	10307	9088	12498	9666	8829	10305	10383	13453	10129	8331	9755	11755	14903	13733	10963	12314	12347	11226	14244	14948
LOC105221967	3.39	4.45	3.63	5.14	3.74	5.74	5.41	4.94	7.49	6.11	4.74	5.39	4.34	4.08	4.96	5.61	6.18	5.73	5.86	5.26	5.99	6.25	5.27	5.31	6.71	66	72	70	86	61	87	111	67	114	105	69	95	58	47	67	78	113	96	79	80	89	85	95	98
LOC105221968	3.51	2.67	2.61	2.34	2.43	3.77	3.78	3.75	4.17	4.05	2.92	2.81	4.12	3.75	2.74	1.94	2.67	3.26	3.4	3.75	3.32	3.7	4.29	3.66	4.26	98	63	73	57	58	83	112	74	93	103	62	72	79	63	53	39	69	81	66	82	71	73	114	96
LOC105221969	21.89	24.72	21.88	23.33	21.31	21.66	21.82	18.69	22.28	18.37	24.33	23.48	22.85	23.63	20.54	26.71	25.99	22.96	24.3	21.94	23.62	23.99	25.78	23.56	23.39	482	460	482	449	401	376	510	291	392	369	407	474	346	313	313	424	529	450	372	379	398	373	540	488
LOC105221970	5.09	5.27	3.92	4.24	3.1	7.66	7.49	8.24	13.67	7.32	6.14	5.09	7.24	8.1	10.26	9.56	6.76	6.19	8.08	5.41	6.65	5.1	6.24	6.87	5.63	48	42	37	35	25	57	75	55	103	63	44	44	47	46	67	65	59	52	53	40	48	34	56	61
LOC105221972	0.09	0.05	0.21	0.44	0	0.05	0.08	0.24	0	0.38	0	0.09	0.13	0.43	0.25	0.06	0.09	0.05	0.25	0.16	0.17	0.06	0.14	0.27	0.33	2	1	5	9	0	1	2	4	0	8	0	2	2	6	4	1	2	1	4	3	3	1	3	6
LOC105221973	0.04	0.14	0.03	0.1	0.04	0.11	0.07	0.11	0.06	0.16	0.23	0.11	0.16	0.11	0.08	0.11	0.13	0.06	0.03	0.08	0.07	0.06	0.08	0.13	0.22	4	11	3	8	3	8	7	7	4	13	16	9	10	6	5	7	11	5	2	6	5	4	7	11
LOC105221974	2.1	1.82	1.71	2.25	2.05	2.85	2.43	2.03	2.29	2.4	1.29	1.5	1.27	1.41	1.22	1.2	0.86	0.68	1.2	0.72	0.96	0.64	1.2	0.6	1.37	75	56	62	71	65	81	93	51	66	79	35	50	31	31	30	31	28	22	31	20	26	16	41	20
LOC105221975	0	0	0	0	0.08	0.13	0.03	0	0	0	0	0	0	0.05	0	0	0.04	0	0	0	0	0	0.03	0	0	0	0	0	0	2	3	1	0	0	0	0	0	0	1	0	0	1	0	0	0	0	0	1	0
LOC105221976	0	0.1	0.03	0	0	0.18	0.03	0.04	0.07	0	0	0.03	0.04	0	0.08	0	0	0	0	0	0	0	0	0.18	0	0	3	1	0	0	5	1	1	2	0	0	1	1	0	2	0	0	0	0	0	0	0	0	6
LOC105221977	0.19	0.28	0.19	0.05	1.39	0.36	0.65	0.1	0.24	0.52	0.03	0.1	0.17	0.04	0.17	0.1	0.05	0	0.14	0.09	0.25	0.13	0.08	0.08	0.15	8	10	8	2	50	12	29	3	8	20	1	4	5	1	5	3	2	0	4	3	8	4	3	3
LOC105221978	0.15	0.25	0.12	0.16	0.11	0.02	0.05	0.05	0.02	0	0	0	0	0	0.11	0.03	0.02	0.09	0	0.05	0.03	0.05	0	0.02	0	8	11	6	7	5	1	3	2	1	0	0	0	0	0	4	1	1	4	0	2	1	2	0	1
LOC105221979	4.23	4.87	3.68	5.9	3.52	5.91	7.98	4.77	8.75	7.13	9.45	8.5	9.1	6.73	7.71	10.21	7.3	11.03	8.56	10.32	14.83	14.08	15.42	17.48	18.48	69	67	60	84	49	76	138	55	114	106	117	127	102	66	87	120	110	160	97	132	185	162	239	268
LOC105221980	0	0.03	0.03	0	0	0	0	0	0	0	0.04	0.06	0.08	0	0.04	0.16	0.06	0	0.04	0.04	0.04	0.12	0.09	0.03	0.04	0	1	1	0	0	0	0	0	0	0	1	2	2	0	1	4	2	0	1	1	1	3	3	1
LOC105221982	0	0	0	0	0	0	0	0	0	0	0	0	0	0	0	0	0	0	0	0	0	0	0	0	0	0	0	0	0	0	0	0	0	0	0	0	0	0	0	0	0	0	0	0	0	0	0	0	0
LOC105221983	0	0	0	0	0.02	0	0	0	0.02	0	0.02	0	0	0	0	0	0	0.02	0	0.02	0	0	0	0.07	0.04	0	0	0	0	1	0	0	0	1	0	1	0	0	0	0	0	0	1	0	1	0	0	0	4
LOC105221984	7.4	11.49	9.59	7.99	9.67	4.68	4.29	4.75	3.96	3.89	4.11	3.45	4.97	3.84	4.07	5.54	5.68	4.9	4.49	4.1	4.6	3.92	5.57	5.65	4.85	465	610	603	439	519	232	286	211	199	223	196	199	215	145	177	251	330	274	196	202	221	174	333	334
LOC105221985	65.92	68.16	65.55	69.01	70.85	141.11	136.67	118.07	142.69	156.05	136.04	141.94	157.54	153.12	171.56	148.58	121.43	170.43	125.67	153.38	168.25	181.95	179.99	174.07	173.39	2141	1872	2113	1945	1952	3518	4616	2649	3635	4538	3292	4168	3437	2918	3759	3439	3637	4860	2809	3818	4164	4032	5564	5262
LOC105221986	28.27	29.34	27.92	26.99	26.53	24.22	29.59	22.5	23.16	25.97	25.69	29.18	22.59	24.78	29.64	31.56	35.26	33.46	36.86	36.81	36.02	37.72	40.17	37.1	39.09	1399	1225	1404	1168	1130	933	1552	794	896	1161	941	1283	747	719	980	1071	1539	1436	1212	1381	1311	1276	1802	1661
LOC105221987	0.49	0.19	0.55	0.45	0.41	0.21	0.25	0.44	0.44	0.4	0.35	0.22	0.12	0.17	0.33	0.23	0.27	0.3	0.27	0.31	0.78	0.47	0.24	0.24	0.31	24	8	27	19	17	8	13	15	17	18	13	10	4	5	11	8	12	13	9	12	29	16	11	11
LOC105221988	0.1	0.06	0.09	0.05	0.16	0.14	0.17	0.18	0.15	0.18	0.12	0.14	0.09	0.1	0.06	0.22	0.16	0.13	0.19	0.25	0.14	0.06	0.15	0.15	0.2	20	11	19	10	28	23	38	23	21	29	17	26	11	10	8	32	30	25	26	37	23	7	23	29
LOC105221989	0	0.06	0.05	0.09	0	0.14	0.05	0	0.03	0.15	0.14	0.06	0	0	0	0	0.12	0.03	0.16	0	0.18	0	0	0	0.1	0	2	2	3	0	4	2	0	1	5	4	2	0	0	0	0	4	1	4	0	5	0	0	0
LOC105221990	0	0	0	0	0	0	0	0	0	0	0	0.05	0	0	0	0	0	0	0.07	0.06	0	0	0	0.05	0	0	0	0	0	0	0	0	0	0	0	0	1	0	0	0	0	0	0	1	1	0	0	0	1
LOC105221991	3.85	2.32	2.24	3.3	2.58	9.55	5.74	5.72	4.71	7.03	8.07	5.68	4.66	5.39	5.27	6.17	5.11	5.13	4.61	5	4.45	5.05	5.9	5.15	5.07	96	49	56	72	55	188	152	101	94	160	153	130	80	81	91	111	118	114	80	98	85	89	140	121
LOC105221992	0	0	0	0.07	0	0	0	0	0	0	0.15	0.06	0	0	0	0	0	0.13	0	0	0.07	0.08	0	0.06	0	0	0	0	1	0	0	0	0	0	0	2	1	0	0	0	0	0	2	0	0	1	1	0	1
LOC105221993	0	0.67	0.11	0.32	0	1.36	0.21	0	0.28	0.12	0.89	0.12	0.08	0	0	0	0	0	0	0	0	0.08	0.12	0.06	0	0	10	2	5	0	19	4	0	4	2	12	2	1	0	0	0	0	0	0	0	0	1	2	1
LOC105221994	0	0	0	0	0	0	0	0	0	0	0	0	0	0	0	0	0	0	0	0	0	0	0	0	0	0	0	0	0	0	0	0	0	0	0	0	0	0	0	0	0	0	0	0	0	0	0	0	0
LOC105221995	1.9	1.45	1.72	1.43	1.79	2.54	2.63	1.66	1.54	2.37	2.5	3.03	2.58	3.01	3.27	3.73	4.1	3.51	4.42	3.69	2.8	3.53	3.73	4.22	3.55	108	70	98	71	87	114	159	67	70	123	108	158	101	103	129	153	216	178	175	165	122	142	202	226
LOC105221996	0.58	0.61	0.24	0.94	0.56	3.55	2.12	1.83	1.45	2.06	1.35	2.23	1.59	2.44	1.68	2.27	1.62	1.49	1.52	1.3	1.56	1.79	2.11	1.52	1.08	17	15	7	24	14	82	66	38	34	55	30	60	32	43	34	48	44	39	31	30	35	37	59	42
LOC105221997	0	0	0	0	0	0	0	0	0	0	0	0	0	0	0	0	0	0	0	0	0	0	0	0	0	0	0	0	0	0	0	0	0	0	0	0	0	0	0	0	0	0	0	0	0	0	0	0	0
LOC105221998	0	0	0	0	0	0	0	0	0	0	0	0	0	0	0	0	0	0	0	0	0	0	0	0	0	0	0	0	0	0	0	0	0	0	0	0	0	0	0	0	0	0	0	0	0	0	0	0	0
LOC105221999	0	0	0	0	0	0	0.05	0	0	0	0	0	0	0	0	0	0	0	0	0	0	0	0	0	0	0	0	0	0	0	0	1	0	0	0	0	0	0	0	0	0	0	0	0	0	0	0	0	0
LOC105222000	0	0	0	0	0	0	0	0	0	0	0	0	0	0	0	0	0	0	0	0	0	0	0	0	0	0	0	0	0	0	0	0	0	0	0	0	0	0	0	0	0	0	0	0	0	0	0	0	0
LOC105222001	0.57	0.44	0.47	0.47	0.64	0.41	0.67	0.45	0.37	0.31	0.46	0.39	0.52	0.3	0.34	0.48	0.4	0.42	0.5	0.51	0.35	0.32	0.31	0.48	0.44	69	45	57	49	66	39	85	38	36	34	42	43	43	22	28	42	44	45	42	48	32	27	35	54
LOC105222002	0	0.2	0	0	0	0	0	0	0	0	0	0	0	0	0.12	0	0	0	0	0	0	0	0	0	0	0	2	0	0	0	0	0	0	0	0	0	0	0	0	1	0	0	0	0	0	0	0	0	0
LOC105222003	0	0.05	0	0	0	0.03	0	0	0	0	0.03	0	0	0	0	0.06	0.02	0.05	0	0	0.05	0	0	0	0	0	2	0	0	0	1	0	0	0	0	1	0	0	0	0	2	1	2	0	0	2	0	0	0
LOC105222004	0.05	0.06	0.09	0.08	0.39	0.42	0.18	0.1	0.18	0.05	0.21	0.1	0.28	0.12	0.07	0.3	0.13	0.34	0.07	0.21	0.33	0.33	0.12	0.25	0.21	2.01	2.01	4	3	14.39	14.2	8.14	3	6.18	2.09	7	4.03	8.16	3	2.05	9.18	5.1	13.01	2	7	11	10	5	10
LOC105222005	1.85	2.36	1.9	2.38	2.24	4.33	3.18	2.87	3.44	3.8	1.89	1.8	1.79	1.89	1.69	2.21	1.34	1.93	1.98	1.8	1.25	1.68	1.65	1.53	1.74	152.99	164.99	157	172	158.61	282.8	279.86	168	227.82	286.91	119	136.97	101.84	94	96.95	131.82	102.9	141.99	114	117	79	98	130	119
LOC105222006	280.76	282.55	229.07	257.9	147.97	176.39	165.69	191.25	151.25	165.83	125	114	149.28	140	96.94	108.76	113.34	99.75	107.41	108.98	73.98	100.13	103.28	78.17	85.81	9328	7900	7635	7515	4185	4405	5570	4331	3824	4769	3004	3289	3231	2644	2114	2456	3269	2781	2342	2691	1789	2235	2995	2278
LOC105222007	22.24	22.18	23.44	25.33	21.81	26.48	24.5	25.23	23.78	24.57	21.35	21.94	20.27	23.77	22	21.59	20.16	20.76	18.71	18.06	21.43	18.22	20.81	19.84	20.45	1113	938	1174	1108	933	1045	1302	893	951	1122	812	1007	698	716	762	779	933	925	651	709	821	644	991	934
LOC105222008	225.39	229.23	237.44	215.83	241.75	233.41	273.51	234.74	240	241.41	200.61	233.12	175.91	174.28	218.96	338.92	334.13	311.47	337.24	355.45	392.32	392.43	372.14	406.81	423.42	13071	11335	13834	10983	11981	11337	17219	10271	11664	13610	9378	12916	7489	6380	9143	15358	19357	17428	14597	17342	18743	17328	22534	24651
LOC105222009	130.46	132.68	123.95	135.59	119.62	244	221.63	233.81	240.88	228.87	275.32	281.03	282.42	290.07	264.88	247.54	274.51	268.78	287.62	258.97	243.73	238.2	272.51	230.69	244.84	9270	7967	8812	8421	7264	13671	16717	11750	13676	14838	14862	18311	13805	12403	13024	12682	18035	17000	14210	14436	13253	11952	18421	15421
LOC105222010	0.09	0.07	0.08	0.12	0.12	0.19	0.11	0.03	0.22	0.17	0.12	0.06	0.02	0.11	0.1	0.23	0.12	0.21	0.15	0.19	0.28	0.4	0.27	0.32	0.31	14	10	12	17	16	24	19	3	28	25	14	8	2	10	11	26	17	29	17	23	34	45	41	47
LOC105222011	8.73	10.39	8.57	8.7	9.22	12.75	11.15	12.18	11.97	12.38	9.7	11.06	11.3	12.63	12.13	10.26	10.86	11.41	12.52	11.11	11.64	12.31	13.21	11.81	11.35	427	429	419	374	385	494	578	423	468	552	361	500	380	374	413	363	493	496	429	428	432	429	620	545
LOC105222012	15.07	14.99	15.99	17.26	20.1	23.93	20.43	22.65	19.8	20.7	19.14	20.38	17.97	17.32	17.61	21.79	25.24	20.06	27.57	23.71	28.47	25.15	31.01	27.35	26.4	846	711	898	847	964	1059	1217	899	888	1060	816	1049	694	585	684	882	1310	1002	1076	1044	1223	997	1656	1444
LOC105222013	0.7	0.42	0.56	0.58	0.85	0.84	0.59	0.92	0.72	0.93	0.58	0.95	0.81	1.06	1.07	1.08	0.89	0.95	0.94	1.29	1.51	1.11	1.05	1.41	1.5	54	27	43	39	56	51	48	50	44	65	34	67	43	49	57	60	63	65	50	78	89	60	77	102
LOC105222014	161.33	164.19	156.77	171.81	160.16	115.37	120.2	113.46	120.74	126.04	134	131.82	135.02	132.19	134.03	136.53	121.1	138.63	128.16	140.28	138.14	140.26	134.62	138.7	146.44	3458	2974	3362	3219	2934	1950	2735	1720	2068	2465	2182	2591	1991	1705	1988	2110	2400	2645	1910	2359	2266	2123	2745	2797
LOC105222015	0	0.07	0.06	0	0.07	0	0.05	0	0	0.13	0	0.19	0.08	0.09	0	0	0	0	0.08	0	0.07	0	0	0	0	0	1	1	0	1	0	1	0	0	2	0	3	1	1	0	0	0	0	1	0	1	0	0	0
LOC105222016	6.08	6.17	6.08	6.23	6.3	11.25	10.57	11.25	10.84	11.03	9.33	9.12	10.14	10.27	8.83	8.53	9.34	8.48	9.29	9.11	7.44	7.46	8.15	8.18	7.55	1854	1589	1854	1660	1642	2705	3422	2426	2642	3068	2161	2550	2126	1884	1863	1876	2632	2301	1970	2179	1735	1607	2365	2345
LOC105222017	0	0	0	0.04	0	0	0	0	0	0	0	0	0	0	0	0	0	0	0	0	0	0	0	0	0	0	0	0	1	0	0	0	0	0	0	0	0	0	0	0	0	0	0	0	0	0	0	0	0
LOC105222018	1.03	0.76	1.12	0.59	0.86	0.61	0.36	0.23	0.48	0.53	0.17	0.35	0.61	0.64	0.28	0.31	0.45	0.18	0.23	0.74	0.38	0.36	0.4	0.55	0.53	32	20	35	16	23	15	12	5	12	15	4	10	13	12	6	7	13	5	5	18	9	8	12	16
LOC105222019	0	0	0	0	0	0	0	0	0	0	0	0	0	0	0	0	0	0	0	0	0	0.06	0	0	0	0	0	0	0	0	0	0	0	0	0	0	0	0	0	0	0	0	0	0	0	0	1	0	0
LOC105222020	0	0	0	0.05	0	0	0	0	0	0	0	0	0	0	0	0	0	0	0	0	0	0	0	0	0	0	0	0	1	0	0	0	0	0	0	0	0	0	0	0	0	0	0	0	0	0	0	0	0
LOC105222021	0	0	0	0	0	0	0.05	0	0	0	0	0	0	0	0	0	0	0	0	0	0	0	0	0	0	0	0	0	0	0	0	1	0	0	0	0	0	0	0	0	0	0	0	0	0	0	0	0	0
LOC105222022	0	0	0	0	0	0	0	0	0	0	0	0	0	0	0	0	0	0	0	0	0	0	0	0	0	0	0	0	0	0	0	0	0	0	0	0	0	0	0	0	0	0	0	0	0	0	0	0	0
LOC105222023	3.88	3.76	3.86	3.5	4.04	2.01	2.37	2.09	2.04	2.39	2.27	3.07	1.95	2.41	3.05	3.59	3.21	2.7	2.9	3.15	4.77	4.21	3.53	3.96	4.33	171	140	170	135	152	70	111	65	72	96	76	124	59	64	93	114	131	106	89	109	161	131	148	164
LOC105222024	17.12	17.09	14.57	17.61	13.18	6.43	5.57	5.76	7.65	6.84	5.77	5.53	6.74	7.41	5.52	6.33	5.81	5.41	5.24	5.98	4.99	5.81	5.81	4.9	5.74	672	567	572	604	442	199	232	160	240	245	172	199	182	175	150	179	211	189	143	184	150	161	217	181
LOC105222025	3.42	2.65	3.47	2.99	4.68	3.26	3.41	3.09	4.46	3.13	3.51	3.01	3.66	4.51	3.3	4.68	3.24	3.05	3.01	3.7	3.48	4.65	4	3.39	3.79	72	47	73	55	84	54	76	46	75	60	56	58	53	57	48	71	63	57	44	61	56	69	80	67
LOC105222026	2.76	3	3.42	4.67	2.7	3.05	2.89	2.83	3.49	2.75	3.4	3.21	3.13	3.2	2.82	2.36	2.93	3.02	2.62	2.29	3.38	3.16	3.38	2.99	3.43	109	100	135	161	91	95	121	79	110	99	102	116	85	76	77	67	107	106	72	71	102	88	127	111
LOC105222027	0	0.03	0	0	0	0	0	0	0	0	0	0	0	0	0	0	0	0.03	0	0	0	0	0	0.03	0	0	1	0	0	0	0	0	0	0	0	0	0	0	0	0	0	0	1	0	0	0	0	0	1
LOC105222028	22.46	14.76	15.44	18.37	15.32	26.62	33.79	29.05	25.91	25.81	18.22	21.71	22.86	13.98	19.17	31.73	29.47	28.23	32.57	37.56	65.08	64.95	57.71	61.08	72.14	1147.55	636	787.39	824.26	668.35	1062.71	1819.1	1036	1045.83	1192.13	696.32	1002.44	792.71	424	669.75	1152.77	1371.92	1262.47	1135.69	1484.41	2505.53	2310.58	2768	2897.18
LOC105222029	9.53	14.75	9.77	12.65	8.65	13.32	11.62	10.54	14.22	12.18	9.25	8.39	8.61	11.06	10.59	8.13	7.07	7.55	7.2	8.02	8.06	7.78	9.18	7.21	6.8	156	204	160	181	121	172	202	122	186	182	115	126	97	109	120	96	107	110	82	103	101	90	143	111
LOC105222030	22.89	25.85	23.92	24.96	24.95	28.71	21.28	25.59	27.5	24.43	21.83	18.49	18.8	20.75	20.52	23.28	22.66	21.7	24.64	24.87	27.25	31.04	34.45	28.97	31.19	922	880	964	879	859	912	910	729	885	898	668	683	521	503	572	676	844	778	690	786	840	883	1320	1098
LOC105222031	7.29	8.34	6.94	9.33	5.89	7.53	10.07	9.42	8.12	6.2	6.4	5.72	6.16	7.73	5.72	6.74	7.62	7.53	6.69	5.31	6.71	5.7	6.97	7.9	5.49	210	203	200	235	145	171	308	192	187	163	140	151	122	134	114	140	203	193	134	120	148	116	191	214
LOC105222032	130.35	147.34	145	131.01	133.82	142.9	128.99	146.59	135.01	150.71	158.01	134.56	134.22	149.61	142	163.56	139.17	161.37	150.1	144.42	165.57	170.92	171.79	177.21	160.77	3298	3147	3688	2890	2898	2828	3461	2607	2728	3470	3039	3123	2317	2266	2489	2982	3293	3613	2633	2846	3191	3063	4122	4194
LOC105222033	0	0	0	0	0.04	0	0.11	0	0	0	0.1	0	0	0	0	0.11	0	0	0.17	0.2	0.3	0.05	0.08	0.12	0.24	0	0	0	0	1	0	3	0	0	0	2	0	0	0	0	2	0	0	3	4	6	1	2	3
LOC105222034	81.11	92.44	92.22	85.77	80.95	122.7	93.64	89.2	101.06	104.49	97.82	81.39	70.75	88.39	95.23	81.64	69.3	86.98	71.09	71.14	80.11	77.74	80.15	82.28	74.34	1744	1682	1993	1621	1489	2085	2139	1358	1741	2060	1594	1602	1047	1143	1421	1272	1382	1672	1066	1202	1319	1184	1646	1667
LOC105222035	2.05	1.44	1.61	1.55	1.5	3.71	4.04	3.83	3.35	3.58	4.11	4.1	3.35	3.45	3.66	4.83	4.64	4.58	4.61	5.25	4.17	4.11	4.6	4.2	4.25	306	182	240	205	195	439	635	409	405	487	461	555	354	306	386	521	648	618	482	607	479	429	657	588
LOC105222036	3.79	4.64	3.79	4.68	4.68	4	5.02	2.71	3.04	4.06	2.41	3.81	3.96	3.89	2.83	2.78	3.59	3.88	3.55	4.23	4.06	4.34	4.3	3.53	3.45	89	92	89	96	94	74	125	45	57	87	43	82	64	55	46	47	78	81	58	78	73	72	96	78
LOC105222037	0.08	0.43	0.17	0.22	0.1	0.28	0.18	0.28	0.56	0.58	0.36	0.18	0.24	0.51	0.56	0.23	0.33	0.25	0.44	0.11	0.29	0.24	0.21	0.47	0.32	3	13	6	7	3	8	7	7	16	19	10	6	6	11	14	6	11	8	11	3	8	6	7	16
LOC105222038	17.26	15.92	16.25	17.03	16.91	21.09	19.83	19.99	20.11	20.96	20.75	21.74	15.3	18.01	21.25	17.45	18.6	18.62	17.56	17.79	20.76	19.58	23.18	18.54	18.28	277	216	261	239	232	267	338	227	258	307	253	320	169	174	236	202	276	266	196	224	255	222	354	280
LOC105222039	1.46	1.22	1.74	1.24	1.3	2.35	2.1	1.62	1.75	2	1.88	1.74	2.12	1.95	1.57	2.46	1.82	2.05	2.18	1.82	1.94	2.02	1.5	1.85	1.95	51	36	61	38	39	65	78	40	49	64	50	56	51	41	38	62	59	64	53	50	52	50	50	61
LOC105222040	13.1	15.64	13.11	13.8	13.23	15.44	14.38	14.63	16.68	15.14	13.08	11.74	12.02	12.67	11.82	12.38	10.9	13.57	11.58	11.84	11.3	11.39	10.92	12.07	10.73	524	529	514	475	454	492	598	416	537	555	399	433	332	298	330	355	406	479	323	372	348	325	406	456
LOC105222041	8.92	7.86	7.35	6.67	7.34	3.35	4.52	2.35	3.19	3.13	4.11	5.09	3.52	5.11	4.66	6.69	4.94	5.23	4.87	6.81	6.63	7.93	7.14	7.51	7.52	220	164	182	144	156	66	120	41	63	71	77	115	60	77	80	120	113	115	84	132	125	138	168	175
LOC105222042	0	0	0	0.02	0	0	0	0	0	0	0	0	0	0	0	0	0	0	0	0	0	0	0	0	0	0	0	0	1	0	0	0	0	0	0	0	0	0	0	0	0	0	0	0	0	0	0	0	0
LOC105222043	0	0	0	0	0	0	0	0	0	0	0	0	0	0	0	0	0	0	0	0	0	0	0	0	0	0	0	0	0	0	0	0	0	0	0	0	0	0	0	0	0	0	0	0	0	0	0	0	0
LOC105222044	0	0	0	0	0	0	0	0	0	0	0	0	0	0	0	0	0	0	0	0	0	0	0	0	0.08	0	0	0	0	0	0	0	0	0	0	0	0	0	0	0	0	0	0	0	0	0	0	0	0
LOC105222045	0.03	0	0	0	0	0.04	0.06	0.04	0.11	0	0	0.13	0.09	0.05	0	0	0.03	0	0.13	0.08	0	0	0.03	0.06	0.04	1	0	0	0	0	1	2	1	3	0	0	4	2	1	0	0	1	0	3	2	0	0	1	2
LOC105222047	19.9	18.92	24.56	19.79	15.34	29.94	26.7	36.78	24.65	29.11	16.08	18.78	18.95	15.51	16.96	17.32	12.47	19.04	15.6	14.17	14.44	15.84	16.16	18.16	15.8	290	233	358	252	191	344	413	379	287	387	178	251	190	136	171	182	168	247	158	162	161	163	224	249
LOC105222048	0.13	1.2	0.32	0.8	0.22	3.05	0.66	0.45	0.16	0.83	1	0.62	1.2	0.32	0.46	0.44	0.68	0.36	0.91	0.73	0.74	0.54	1.26	0.67	0.48	2	16	5	11	3	38	11	5	2	12	12	9	13	3	5	5	10	5	10	9	9	6	19	10
LOC105222049	7.3	7.23	10.37	6.54	10.42	7.84	8.8	7.14	8.54	8.64	7.9	9.5	8.66	8.82	9.66	10.49	12.12	9.89	12.33	13.96	13.62	12.94	14.56	13.37	15.13	483	404	686	378	589	409	618	334	451	521	397	576	394	351	442	500	741	582	567	724	689	604	916	832
LOC105222050	14.4	10.29	11.55	13.29	11.88	21.5	21.53	19.21	20.5	19.76	18.13	19.8	22.61	18.25	21.47	19.81	22.45	18.4	16.97	16.99	18.25	21.04	18.82	18.08	18.55	227	137	182	183	160	267	360	214	258	284	217	286	245	173	234	225	327	258	186	210	220	234	282	268
LOC105222051	3.7	2.66	3.04	3.48	3.58	2.23	2.77	1.88	1.46	1.92	1.41	2.39	2.11	1.64	1.41	3.41	3.29	3.45	3.3	3.95	4.12	4.62	4.79	4.64	4.44	270	164	222	222	223	128	214	97	85	128	78	160	106	72	71	179	222	224	167	226	230	238	332	318
LOC105222052	0	0	0	0	0	0.13	0	0	0	0	0	0	0.11	0	0	0	0	0	0	0	0	0	0	0.17	0	0	0	0	0	0	1	0	0	0	0	0	0	1	0	0	0	0	0	0	0	0	0	0	2
LOC105222053	24.82	21.67	22.37	22.37	22.03	10.84	15.69	10.48	11.78	12.66	15.25	17.04	12.95	13.07	15.35	21.44	20.81	19.72	20.61	22.89	26.64	22.6	24.59	27.73	29.43	925	680	832	727	701	308	620	273	351	427	441	571	334	295	389	585	721	654	525	670	759	586	865	960
LOC105222054	4.16	4.28	5.04	4.13	4.59	3.2	3.85	3.71	4.14	3.55	6.19	5.87	4.41	4.87	4.78	5.53	5.79	6.51	5.93	6.52	7.53	7.1	7.31	7.36	7.16	122	106	148	106	115	74	120	77	97	95	138	158	89	86	97	117	157	170	121	150	169	147	204	203
LOC105222055	13.21	9.89	10.02	13.51	13.3	100.27	107.29	110.22	112.9	89.47	64.69	66.78	66.58	64.82	76.5	56.96	62.01	51.96	53.77	52.13	47.91	50.42	44.28	51.11	46.81	237	150	180	212	204	1419	2044	1399	1619	1465	882	1099	822	700	950	737	1029	830	671	734	658	639	756	863
LOC105222056	54.44	55.09	52.59	54.5	52.07	60.15	64.73	59.81	56.57	60.56	69.42	67.93	69.21	72.93	64.77	74.24	75.68	71.3	77.96	77.87	72.94	74.31	80.58	83.23	76.96	1857	1588	1795	1625	1518	1618	2344	1443	1542	1885	1799	2125	1624	1497	1529	1826	2387	2165	1849	2084	1904	1790	2615	2671
LOC105222057	71.06	75.15	74.15	67.4	70.98	46.39	52.45	48.08	50.51	51.53	50.12	53.11	57.05	51.86	48.53	60.45	61.96	58.19	64.84	67.33	64.35	65.22	72.01	70.26	70.47	5770	5157	6024	4784	4926	2970	4521	2761	3277	3818	3092	3955	3187	2534	2727	3539	4652	4206	3661	4289	3999	3740	5563	5367
LOC105222058	29.17	30.71	31.56	30.29	30.89	36.89	31.63	28.56	39.57	35.68	40.87	35.86	37.9	38.71	37.32	38.87	34.55	36.85	32.1	34.74	35.19	34.96	39.93	37.51	35.87	715	636	774	649	647	713	823	495	775	798	761	806	639	571	633	687	783	804	547	668	660	605	931	865
LOC105222059	0.14	0.23	0.22	0.25	0.39	0.21	0.45	0.12	0.17	0.52	0.11	0.3	0.4	0.46	0.4	0.42	0.75	0.56	0.36	0.46	0.65	0.87	0.56	0.65	1.16	5	7	8	8	12	6	17	3	5	17	3	10	10	10	10	11	25	18	9	13	18	22	19	22
LOC105222060	5.56	5.05	5.31	4.6	5.39	2.45	4.38	1.73	2.22	2.74	4.9	4.9	2.75	4.37	4.33	9.21	8	7.83	8.69	9.22	10.05	12.28	11	13.16	11.76	391	300	374	283	324	136	327	86	125	176	262	316	133	185	211	467	520	490	425	509	541	610	736	871
LOC105222062	32.2	36.4	29.7	30.24	29.55	40.24	42.36	45.85	37.4	36.83	55.91	49.58	62.92	50.96	54.46	65.51	70.23	66.47	60.81	60.39	59.28	59.9	67.44	61.37	55.46	1442	1412	1360	1233	1128	1459	2103	1525	1378	1563	1947	2088	1998	1434	1749	2181	3038	2757	1986	2188	2075	1988	3010	2668
LOC105222063	0	0	0	0	0	0	0	0	0	0	0	0	0	0	0	0	0	0	0	0.37	0	0	0	0	0	0	0	0	0	0	0	0	0	0	0	0	0	0	0	0	0	0	0	0	2	0	0	0	0
LOC105222064	78.16	83.05	80.88	87.28	82.92	91.13	78.74	85.43	98.93	92.15	98.61	95.77	94.14	97.62	108.54	94.87	86.56	86.04	90.16	96.62	89.39	95.06	90.14	103.2	90.41	793	712	821	774	719	729	848	613	802	853	760	891	657	596	762	694	812	777	636	769	694	681	870	985
LOC105222065	7.96	7.21	7.49	6.6	6.81	10.56	8.81	10.07	10.13	8.82	8.57	8.73	6.83	8.35	8.27	4.58	9.51	6.8	7.36	7.53	7.9	8.3	7.73	8.36	9.54	171	131	161	124	125	179	201	153	174	173	140	172	101	108	123	71	189	130	110	127	130	126	158	169
LOC105222066	0.01	0	0.01	0	0	0.07	0	0	0.01	0.03	0	0	0	0	0	0	0.08	0	0	0.01	0	0	0	0.01	0	1	0	1	0	0	5	0	0	1	2	0	0	0	0	0	0	6	0	0	1	0	0	0	1
LOC105222067	0.08	0.12	0	0.26	0.18	0.23	0.02	0.11	0	0	0.13	0	0	0	0	0	0.06	0	0	0	0.17	0	0.03	0	0.03	3	4	0	9	6	7	1	3	0	0	4	0	0	0	0	0	2	0	0	0	5	0	1	0
LOC105222068	0	0	0	0	0	0	0.27	0	0	0	0	0	0.08	0	0	0	0	0	0	0	0	0	0	0	0	0	0	0	0	0	0	5	0	0	0	0	0	1	0	0	0	0	0	0	0	0	0	0	0
LOC105222070	0.15	0.12	0	0.06	0.3	74.81	96.04	141.99	244.59	159.5	177.59	168.33	127.44	320.03	306.69	218.19	30.02	194.28	140.62	163.65	211.11	221.2	154.48	180.13	255.46	3	2	0	1	5	1156	1998	1968	3830	2852	2644	3025	1718	3774	4159	3083	544	3389	1916	2516	3166	3061	2880	3321
LOC105222071	0	0	0	0	0	3.1	2.66	6.23	11.22	6.37	5.08	4.15	2.69	13.1	12.25	5.96	0.59	3.97	6.25	5.47	4.47	6.47	2.8	5.32	7.22	0	0	0	0	0	45	52	81	165	107	71	70	34	145	156	79	10	65	80	79	63	84	49	92
LOC105222072	0.49	0.29	0.24	0.49	0.36	100.4	150.01	114	319.04	372.64	387.38	382.73	132.62	446.62	579.05	399.96	56.68	368.27	198.96	628.28	838.87	672.73	368.93	467.84	533.17	8	4	4	7	5	1299	2613	1323	4183	5579	4829	5759	1497	4410	6575	4732	860	5379	2270	8088	10534	7795	5759	7222
LOC105222073	0.82	1.22	0.64	1.3	0.96	0.18	0.13	0.35	0.27	0.31	0.05	0.08	0	0.18	0.26	0.15	0.08	0.04	0.1	0.14	0.23	0	0.04	0.04	0.05	23	29	18	32	23	4	4	7	6	8	1	2	0	3	5	3	2	1	2	3	5	0	1	1
LOC105222074	0	0	0	0	0	0	0	0	0	0	0	0	0	0	0.08	0	0	0	0	0	0	0	0	0	0	0	0	0	0	0	0	0	0	0	0	0	0	0	0	3	0	0	0	0	0	0	0	0	0
LOC105222075	77	82.07	78.33	78.35	78.59	83.51	83.05	87.31	89.36	76.41	83.68	79.5	88.77	81.35	78.97	81.79	74.02	72.7	74.27	67.8	66.88	71	73.19	77.11	71.33	1691	1523	1721	1504	1475	1446	1936	1356	1568	1531	1396	1601	1341	1075	1200	1295	1503	1421	1134	1168	1124	1101	1529	1593
LOC105222076	206.4	212.82	224.9	198.82	203.12	213.84	203.21	219.97	198.25	217.11	169.53	183.2	179.92	185.98	168.96	150.08	145.6	143.4	152.76	151.45	141.54	141.86	163.38	161.27	148.79	9909	8634	10803	8343	8334	8095	10356	7469	7605	9510	6183	8065	5942	5373	5613	5195	6463	6128	5099	5704	5200	4809	7462	7284
LOC105222077	83.63	90.44	90.08	94.4	87.19	60.35	66.14	57.77	61.9	65.3	59.29	64.06	60.67	56.05	56.86	59.82	54.61	56.86	57.51	53.3	59.9	58.99	58.73	60.41	56.08	2100	1919	2263	2072	1871	1195	1763	1026	1242	1496	1131	1475	1048	847	988	1083	1268	1271	1004	1050	1151	1046	1403	1427
LOC105222078	316.29	333.84	333.74	315.05	294.15	347.77	310.29	358.46	327.01	331.79	287.13	310.69	297.34	294.75	272.12	224.63	219.35	206.92	223.87	195.8	174.46	169.58	191.95	197.93	165.71	10985	9798	11597	9564	8731	9524	11440	8805	9075	10514	7576	9895	7104	6160	6540	5625	7044	6397	5406	5335	4637	4159	6342	6467
LOC105222079	0.09	0.11	0.13	0.04	0.11	0.08	0.15	0.13	0.12	0.21	0.17	0.21	0.18	0.21	0.05	0.31	0.07	0.07	0.09	0.04	0.08	0.09	0.23	0.23	0.16	3	3	4	1	3	2	5	3	3	6	4	6	4	4	1	7	2	2	2	1	2	2	7	7
LOC105222080	13.7	9.47	10.71	9.62	11.43	11.18	9.2	12.66	16.47	12.49	14.65	11.39	13.22	9.92	14.51	14.49	10.86	11.74	13.27	9.17	13.12	12.11	12.55	12.98	16.14	101	59	79	62	72	65	72	66	97	84	82	77	67	44	74	77	74	77	68	53	74	63	88	90
LOC105222081	1.79	1.77	2.11	1.66	1.62	1.07	1.2	1.06	0.74	0.77	0.93	1.66	0.63	1.36	1.51	1.95	1.99	1.74	1.44	2.09	2.14	2.16	2.13	2	2.18	79	66	93	64	61	37	56	33	26	31	31	67	19	36	46	62	81	68	44	72	72	67	89	83
LOC105222082	0.09	0	0	0.15	0	0.06	0.08	0	0	0	0.17	0	0	0	0	0	0.05	0.05	0	0	0	0	0.14	0.14	0.06	2	0	0	3	0	1	2	0	0	0	3	0	0	0	0	0	1	1	0	0	0	0	3	3
LOC105222083	0	0	0	0	0	0	0	0.04	0	0	0	0	0	0	0	0.06	0	0	0	0	0	0	0	0	0	0	0	0	0	0	0	0	2	0	0	0	0	0	0	0	3	0	0	0	0	0	0	0	0
LOC105222084	0	0	0	0	0	0	0	0	0	0	0	0	0	0	0	0	0	0	0	0	0	0	0	0	0	0	0	0	0	0	0	0	0	0	0	0	0	0	0	0	0	0	0	0	0	0	0	0	0
LOC105222085	0.14	0.45	0.06	0.16	0.02	0.13	0.21	0.26	0.35	0.95	0.03	0.02	0	0	0.2	0	0.04	0.18	0	0	0.16	0.09	0	0.11	0	7	19	3	7	1	5	11	9	14	43	1	1	0	0	7	0	2	8	0	0	6	3	0	5
LOC105222086	0	0	0	0	0	0	0	0.21	0	0	0	0	0	0	0	0	0	0	0	0	0	0	0	0	0	0	0	0	0	0	0	0	1	0	0	0	0	0	0	0	0	0	0	0	0	0	0	0	0
LOC105222087	0	0	0	0	0	0	0	0	0	0	0	0	0	0	0	0	0	0	0	0	0	0	0	0	0	0	0	0	0	0	0	0	0	0	0	0	0	0	0	0	0	0	0	0	0	0	0	0	0
LOC105222088	0	0	0	0	0	0	0	0	0	0	0	0	0	0	0	0	0	0.24	0	0.07	0	0.07	0.06	0	0.07	0	0	0	0	0	0	0	0	0	0	0	0	0	0	0	0	0	4	0	1	0	1	1	0
LOC105222089	0.25	0.3	0	0.43	0.29	0.48	0.59	0.27	0.39	0.27	0	0	0	0.1	0.09	0.17	0.07	0.21	0.27	0.16	0	0.18	0.13	0.07	0	4	4	0	6	4	6	10	3	5	4	0	0	0	1	1	2	1	3	3	2	0	2	2	1
LOC105222090	11.85	11.28	11.51	11.22	12	19.42	18.18	18.39	17.54	17.45	17.74	17.03	20.56	19.21	16.68	19.32	19.89	19.91	20.15	19.31	17.99	18.37	20.64	19.65	18.85	1142	912	1108	939	988	1468	1860	1259	1346	1540	1298	1510	1359	1102	1114	1343	1773	1698	1341	1455	1323	1237	1871	1758
LOC105222091	0	0	0	0	0	0	0	0	0	0	0	0	0	0	0	0	0	0	0	0	0	0	0	0	0	0	0	0	0	0	0	0	0	0	0	0	0	0	0	0	0	0	0	0	0	0	0	0	0
LOC105222092	9.41	10.29	8.45	9.36	7.83	9.42	11.08	9.72	7.44	8.15	9.49	8.84	5.82	8.13	7.39	10.12	8.82	5.35	6.5	7.61	8.24	9.41	7.62	10.02	8.3	118	107	105	101	82	95	148	88	75	94	90	103	50	60	64	91	102	59	57	75	80	84	90	117
LOC105222093	12.38	14.06	13.18	13.12	14.33	5.3	5.94	6.34	5.61	6.92	6.79	5.81	6.43	7.17	6.37	6.79	7.23	6.41	8.43	7.66	8.02	7.6	8.34	8.15	8.58	657	631	700	609	650	222	335	238	238	335	274	283	235	229	234	260	355	303	311	319	326	285	421	407
LOC105222094	591.14	670.62	619.27	627.96	561.25	669.07	576.95	607.82	631.02	660.66	439.12	413.58	448.34	429.82	431.74	321.09	327.48	319.2	289.75	275.05	251.85	261.88	322.99	259.95	258.42	13336	12785	13978	12383	10821	11902	13817	9698	11375	13599	7526	8556	6958	5835	6740	5223	6831	6410	4545	4868	4348	4172	6932	5517
LOC105222095	61.94	61.39	62.6	64.53	57.76	34.45	35.19	31.39	38.01	44.38	42.46	34.56	33.36	40.86	43.26	44.91	42.17	42.67	42.96	41.12	47.66	44.7	47.66	44.32	41.53	985	825	996	897	785	432	594	353	483	644	513	504	365	391	476	515	620	604	475	513	580	502	721	663
LOC105222096	4.4	4.18	4.2	3.27	2.5	4.13	3.96	4.83	5.1	4.39	3.83	4.91	3.64	4.04	3.65	2.86	3.62	4.05	3.59	4.45	4.05	4.04	4.17	5.05	4.26	187	151	179	122	91	139	179	146	174	171	123	192	107	103	108	88	143	154	106	149	132	122	169	203
LOC105222097	6.04	4.32	5.35	5.33	4.84	3.65	2.9	3.72	3.96	4.22	3.04	4.2	4.18	2.49	3.75	2.42	2.8	3.6	4.2	3.62	2.44	4.02	3.41	3.88	3.08	149	90	132	115	102	71	76	65	78	95	57	95	71	37	64	43	64	79	72	70	46	70	80	90
LOC105222098	2.17	1.82	2.05	1.89	2.1	1.82	2.13	1.56	1.59	1.65	1.48	1.71	0.92	1.29	1.34	2.13	2.19	2.02	2.58	2.26	1.93	1.7	1.49	1.6	2.4	210	149	199	160	174	139	219	107	123	146	109	152	61	75	90	149	196	174	174	172	143	116	137	146
LOC105222099	63.39	63.33	61.1	61.16	63.55	44.36	50.67	48.29	50.25	46.78	55.68	57.46	51.89	50.45	55	61.56	60.94	68.96	67.91	63.03	65.8	72.28	75.51	77.17	73.59	2305	1946	2223	1944	1975	1272	1956	1242	1460	1552	1538	1916	1298	1104	1384	1614	2049	2232	1717	1798	1831	1856	2612	2640
LOC105222100	0.09	0.08	0.06	0.17	0.1	0.16	0.22	0.12	0.11	0.14	0.17	0.02	0.06	0	0.09	0.21	0.05	0.05	0.06	0.05	0.03	0	0	0.02	0	4	3	3	7	4	6	11	4	4	6	6	1	2	0	3	7	2	2	2	2	1	0	0	1
LOC105222101	98.17	106.47	104.78	84.73	112.06	62.73	50.52	62.29	49.77	53.99	51.72	51.29	42.72	42.24	44.16	48.86	51	48.99	55.76	51.72	41.8	45.32	47.62	49	42.43	6206	5688	6627	4682	6054	3127	3390	2785	2514	3114	2484	2973	1858	1607	1932	2227	2981	2757	2451	2565	2022	2023	2864	2914
LOC105222102	0	0	0	0	0.02	0	0	0	0	0	0	0	0	0	0	0	0	0	0.05	0	0	0	0	0	0	0	0	0	0	1	0	0	0	0	0	0	0	0	0	0	0	0	0	2	0	0	0	0	0
LOC105222103	0.04	0	0	0	0	0	0	0.05	0	0	0.05	0	0	0	0.16	0	0.04	0	0	0	0	0	0.04	0	0.05	1	0	0	0	0	0	0	1	0	0	1	0	0	0	3	0	1	0	0	0	0	0	1	0
LOC105222104	10.76	11.32	9	11.4	9.27	27.28	26.77	28.35	34.65	43.69	25.41	21.91	13.19	32.49	30.1	21.07	10.47	15.71	11.64	19.42	18.94	13.71	11.31	10.05	14.04	190	169	159	176	140	380	502	354	489	704	341	355	160	345	368	266	171	247	143	269	256	171	190	167
LOC105222105	1.19	1.23	1.07	1.16	1.28	0.86	1.03	0.72	0.91	0.58	0.41	0.19	0.39	0.81	0.6	0.94	1.05	0.82	0.59	1.02	0.7	1	0.33	0.44	0.67	49	43	44	42	45	28	45	21	30	22	13	7	11	20	17	28	40	30	17	33	22	29	13	17
LOC105222106	0.06	0.18	0	0	0.04	0	0	0	0	0.03	0	0.03	0	0	0	0.04	0	0	0	0.04	0.04	0.04	0.03	0	0	2	5	0	0	1	0	0	0	0	1	0	1	0	0	0	1	0	0	0	1	1	1	1	0
LOC105222107	14.68	15.32	13.23	14.28	13.39	7.95	5.97	8.11	7.3	6.32	5.31	4.4	4.11	6	6.41	3.95	4.97	3.4	6.44	5.04	4.67	4.7	4.68	5.25	4.73	471	416	423	397	366	195	197	181	183	179	127	127	89	112	139	89	145	96	138	123	113	103	139	154
LOC105222108	8.04	8.54	7.06	9.66	8.19	2.57	3.47	2.3	2.8	3.23	3.15	2.44	2.05	3.42	3.86	4.43	4.71	4.62	4.68	6.34	5.22	5	2.97	4.67	3.96	262	235	230	275	228	66	120	53	73	96	78	73	46	67	87	104	142	134	106	162	130	115	92	143
LOC105222109	28.13	27.01	28.64	26.25	27.59	26.9	21.99	25.76	24.96	21.92	18.59	22.38	23.38	20.5	19.91	17.91	18.7	14.38	16.08	15.73	16.12	16.9	17.15	15.99	16.19	488	396	497	398	409	368	405	316	346	347	245	356	279	214	239	224	300	222	194	214	214	207	283	261
LOC105222110	34.16	29.5	31.31	33.47	30.19	55.4	48.01	48.65	54.25	52.81	47.13	37.36	43	43.76	49.32	42.09	36.88	41.46	39.5	36.69	37.51	36.65	32.65	37.45	36.32	425.86	312.01	392.4	366.12	324.86	545.21	634.59	424.57	535.48	599.04	447.01	426.05	368.45	327.81	421.7	378.07	426.32	456.94	340.49	359.85	355.24	321.75	386.1	442.27
LOC105222111	1.97	2.12	2.01	2.31	1.81	1.61	1.79	1.44	1.93	1.52	2.01	2.1	2.01	2.23	2.24	2.43	2.35	2.05	2.49	2.69	3.06	2.32	2.23	2.16	2.9	113.14	102.99	115.6	115.88	89.14	72.79	109.41	58.43	88.52	79.96	87.99	110.95	79.55	77.19	89.3	100.93	124.68	105.06	99.51	121.15	134.76	94.25	121.9	116.73
LOC105222112	5.04	5.43	5.02	5.44	4.39	5.03	4.12	5.34	5.17	5.76	3.11	3.15	2.88	3.89	3.52	2.72	2.56	2.34	2.13	3.05	2.78	1.86	1.96	2.39	2.42	211	192	210	199	157	166	183	158	173	220	99	121	83	98	102	82	99	87	62	100	89	55	78	94
LOC105222113	0.3	0.27	0.34	0.61	0.33	0.67	0.35	0.47	0.31	0.79	0.51	0.33	0.15	0.24	0.36	0.27	0.36	0.24	0.28	0.32	0.21	0.48	0.63	0.43	0.4	17	13	19	30	16	30	21	19	14	41	22	17	6	8	14	11	19	12	11	14	9	19	34	23
LOC105222114	12.96	14.11	12.66	14.66	13.3	12.81	9.69	11.71	11.15	11.8	9.87	8.67	10.85	9.07	9.07	8.34	8.31	8.34	8.76	7.86	7.76	8.36	9.37	7.93	8.55	349	321	341	345	306	272	277	223	240	290	202	214	201	147	169	162	207	200	164	166	160	159	240	201
LOC105222115	23.49	23.66	21.34	21.85	24.19	7.77	7.58	6.83	8.37	7.29	7.66	6.92	6.7	8.02	7.25	8.93	7.5	8.07	6.9	9.15	7.97	7.19	9.11	9.41	8.3	759	646	690	617	668	198	260	156	216	215	188	205	149	156	162	208	224	232	155	232	197	164	280	286
LOC105222117	22.66	20.77	19.16	19.97	18.74	17.29	24.86	17.5	18.42	18.03	23.96	23.9	19.76	20.15	23.1	33.45	35.26	32.12	32.87	37.96	40.57	43.36	46.38	44.53	44.31	1544	1196	1306	1189	1091	929	1798	843	1003	1121	1240	1493	926	826	1089	1643	2221	1948	1557	2029	2115	2086	3006	2854
LOC105222118	6.27	6.53	5.19	6.63	5.86	4.77	5.08	5.62	5.21	6	4.1	5.04	5.4	4.42	3.91	4.64	5.37	4.61	4.6	5.2	4.6	4.71	4.14	4.18	5.15	292	257	242	270	233	175	251	185	194	255	144	215	173	123	126	155	231	191	149	190	164	155	183	183
LOC105222119	3.87	4.69	3.69	4.02	5.18	2.68	3.17	2.96	2.4	2.71	3.25	4.05	3.49	3.85	3.63	5.4	4.21	4.73	3.81	4.28	5.87	5.29	5.43	6.22	5.86	174	178	166	158	199	95	151	94	86	111	111	167	108	104	113	175	175	189	119	151	202	168	232	263
LOC105222120	0	0	0	0	0.06	0	0	0	0.03	0	0	0	0	0	0.03	0.03	0	0.05	0	0	0	0	0.05	0	0.06	0	0	0	0	2	0	0	0	1	0	0	0	0	0	1	1	0	2	0	0	0	0	2	0
LOC105222121	0.43	0.77	0.77	0.75	0.48	0.2	0.28	0.25	0.37	0.33	0.26	0.41	0.26	0.2	0.17	0.44	0.43	0.4	0.4	0.3	0.36	0.53	0.5	0.29	0.4	22	33	41	35	21	8	15	9	15	16	10	19	9	6	6	16	20	18	14	12	15	19	24	14
LOC105222122	0	0	0	0	0.06	0	0	0	0	0	0	0	0	0	0	0	0	0	0.21	0	0	0	0	0	0	0	0	0	0	1	0	0	0	0	0	0	0	0	0	0	0	0	0	3	0	0	0	0	0
LOC105222124	0.87	1.01	0.74	1.15	0.58	0.48	0.25	0.35	0.62	0.93	0.53	0.27	0.23	0.41	0.39	0.72	0.39	0.5	1.29	0.6	0.62	0.38	0.52	0.31	0.45	39	38	33	45	22	17	12	11	22	38	18	11	7	11	12	23	16	20	40	21	21	12	22	13
LOC105222125	3.64	2.75	2.11	2.66	2.72	3.08	3.78	3.95	3.56	4.97	3.05	3.91	2.68	3.07	3.35	3.15	2.68	3.73	2.96	2.55	2.96	3.81	2.66	3.64	3.4	69	44	40	44	44	46	76	53	54	86	44	68	35	35	44	43	47	63	39	38	43	51	48	65
LOC105222126	4.73	4.17	3.94	4.39	4.86	5.59	7.04	5.43	5.48	5.76	4.64	5.44	4.22	4.39	4.68	6.71	6.83	6.11	7.01	7.11	7.51	7.65	9.6	7.93	7.74	530	396	453	432	467	497	838	432	492	590	396	557	326	295	368	545	706	610	546	634	653	610	1027	839
LOC105222127	1.47	1.15	1.84	1.43	1.56	0.74	1.39	0.94	1.04	0.86	1.25	1.83	1.53	2.11	0.96	1.59	1.59	1.65	1.71	1.75	2.45	1.54	2.54	2.02	1.74	73	48	91	62	66	29	73	33	41	39	47	83	52	63	33	57	73	73	59	68	93	54	120	94
LOC105222128	14.82	15.4	13.75	14.58	14.48	14.75	11.56	15.24	15.69	11.7	7.97	9.38	10.89	11.39	7.75	6.56	7.12	5.43	6.03	6.36	6.52	5.49	3.74	5.42	5.64	279	245	259	240	233	219	231	203	236	201	114	162	141	129	101	89	124	91	79	94	94	73	67	96
LOC105222129	0	0	0	0	0	0.05	0	0	0	0.04	0	0	0	0	0.05	0	0.16	0.04	0	0	0	0	0	0	0.19	0	0	0	0	0	1	0	0	0	1	0	0	0	0	1	0	4	1	0	0	0	0	0	0
LOC105222131	0	0	0	0	0	0	0.1	0.15	0.4	0.29	0.14	0	0.31	0.09	0.15	0	0	0.06	0.08	0.2	0	0.23	0.11	0.23	0.13	0	0	0	0	0	0	2	2	6	5	2	0	4	1	2	0	0	1	1	3	0	3	2	4
LOC105222132	0.67	0.49	0.42	0.32	0.65	6.22	4.46	5.75	5.3	4.21	9.02	6.93	9.72	8.89	7.17	15.73	14.37	12.21	13.02	12.04	10.92	11.84	12.77	14.01	11.28	24	15	15	10	20	176	170	146	152	138	246	228	240	192	178	407	477	390	325	339	300	300	436	473
LOC105222133	73.73	71.63	65.63	66.12	68.57	53.46	62.41	45.87	50.94	52.78	61.85	61.04	52.07	53.63	58.18	81.31	74.79	74.71	80.71	77.58	91.46	95.2	96.11	101.08	96.39	2641	2168	2352	2070	2099	1510	2373	1162	1458	1725	1683	2004.96	1283	1156	1442	2100	2477	2382	2010	2180	2507	2408	3275	3406
LOC105222134	1.67	1.09	1.25	1.37	1.38	1.66	1.83	1.57	1.6	1.8	1.17	1.28	0.98	1.62	1.26	1.67	1.12	1.64	0.9	1.72	1.73	2.57	1.13	1.42	1.71	149	84	113	107	104	115	175	97	115	146	77	105	61	88	77	104	91	131	57	119	117	157	96	119
LOC105222135	0.1	0.23	0.28	0.15	0.15	0.28	0.65	0.41	0.32	0.55	0.54	0.63	0.37	0.52	0.55	0.83	1.04	0.32	1.31	1.43	1.09	1.54	0.83	1.24	0.56	3	6	9	4	4	7	22	9	8	16	13	18	8	10	12	19	30	9	29	35	26	34	25	36
LOC105222136	43.21	41.4	43.14	39.91	41.75	24.14	31.41	24.59	29.25	25.13	28.73	30.65	22.89	24.02	32.41	36.84	37.35	34.88	40.93	42.5	42.39	42.49	29.65	35.28	31.9	867	702	866	700	716	382	669	349	469	460	438	564	316	290	450	533	693	623	571	669	651	602	566	666
LOC105222137	30.36	31.33	29.26	27.08	28.24	49.12	63.55	57.82	74.33	84.04	61.47	63.4	52.75	73.07	75.69	64.82	41.83	73.25	60.73	79.77	89.22	88.41	67.65	78.3	79.25	748	649	717	579	568	873	1515	921	1326	1707	1028	1285	805	956	1155	1039	867	1434	955	1413	1541	1383	1453	1675
LOC105222138	1612.68	1406.17	1375.98	1506.81	1441.62	892.28	783.28	746.34	922.22	896.27	735.03	735.2	670.34	701.41	773.41	662.54	606.13	663.54	620.8	628.67	627.93	600.48	681.11	661.45	642.04	18206	13415	15542	14869	13909	7943	9387	5959	8319	9232	6304	7611	5206	4765	6042	5393	6327	6668	4873	5568	5425	4787	7315	7025
LOC105222139	38.28	33.46	39.31	38.38	37.05	52.65	51.08	45.94	59.21	59.02	51.38	48.8	50.18	54.37	56.08	52.47	44.17	46.64	46.41	53.97	56.02	50.27	41.74	45.25	44.44	509	376	523	446	421	552	721	432	629	716	519	595	459	435	516	503	543	552	429	563	570	472	528	566
LOC105222140	288.8	299.46	292.3	286.94	301.01	277.28	268.09	251.06	257.77	260.58	250.97	250.29	259.32	262.86	253.72	249.65	261.12	237.18	258.31	233.24	235.32	230.23	264.88	244.88	234.97	10756	9425	10892	9341	9581	8143	10599	6613	7671	8855	7101	8548	6644	5891	6539	6704	8992	7863	6689	6815	6707	6055	9385	8580
LOC105222141	11.37	12.51	9.53	10.15	10.3	6.26	8.29	6.2	7.27	7.85	7.97	8.27	7.99	7.63	7.74	10.52	9.37	8.56	8.9	7.45	8.27	8.97	7.86	10.2	8.67	327	304	274	255	253	142	253	126	167	206	174	218	158	132	154	218	249	219	178	168	182	182	215	276
LOC105222142	0.93	1.04	1.14	0.63	1.33	1.44	1.65	1.36	1.97	2.46	1.73	1.85	1.53	1.41	1.64	1.7	1.8	1.71	1.85	1.19	1.83	2.31	1.87	1.8	1.85	32	30	39	19	39	39	60	33	54	77	45	58	36	29	39	42	57	52	44	32	48	56	61	58
LOC105222143	0.02	0.06	0.05	0.06	0.06	2.17	2.66	1.78	4.65	4.24	4.58	4.19	1.76	4.37	5.44	3.65	0.57	3.55	4.48	6.34	8.93	6.33	2.13	5.24	7.27	1	2	2	2	2	71	117	52	154	160	144	159	50	109	156	109	22	131	129	206	283	185	84	204
LOC105222144	0	0	0	0	0	0.06	0.05	0.04	0.06	0.03	0	0.11	0.04	0	0.11	0.14	0	0	0.11	0.1	0.1	0.25	0.08	0	0.06	0	0	0	0	0	2	2	1	2	1	0	4	1	0	3	4	0	0	3	3	3	7	3	0
LOC105222147	1.66	1.78	1.09	1.31	0.77	1.03	0.31	0.22	0.38	0.42	1.21	0.67	0.15	0.21	0.29	0.35	0.25	0.72	0.18	0.88	0.7	0.76	0.46	1.19	0.74	65	59	43	45	26	32	13	6	12	15	36	24	4	5	8	10	9	25	5	27	21	21	17	44
LOC105222148	0	0	0	0	0	0.08	0	0	0.08	0.14	0	0.07	0.09	0	0.27	0.17	0.13	0.07	0.09	0	0	0	0	0.13	0	0	0	0	0	0	1	0	0	1	2	0	1	1	0	3	2	2	1	1	0	0	0	0	2
LOC105222149	2.12	2.29	2.57	2.48	2.66	1.29	1.32	0.89	1.02	1.34	0.97	1.06	1.3	0.86	0.84	1.59	1.99	1.89	1.85	1.64	1.74	1.76	2.13	1.7	1.61	135	123	164	138	145	65	89	40	52	78	47	62	57	33	37	73	117	107	82	82	85	79	129	102
LOC105222150	0.08	0	0.08	0.14	0	0	0.12	0.18	0.1	0.23	0.61	0.23	0.49	0.07	0.12	0.35	0.45	0.28	0.18	0.48	0.05	0	0.4	0.27	0.58	2	0	2	3	0	0	3	3	2	5	11	5	8	1	2	6	10	6	3	9	1	0	9	6
LOC105222151	60.58	67.67	55.88	66.37	61.65	51.76	54.49	58.75	59.06	44.52	64.91	69.39	48.81	50.48	52.29	84.69	107.2	91.34	83.68	94.44	86.56	80.05	93.69	104.48	91.38	2856	2696	2636	2735	2484	1924	2727	1959	2225	1915	2325	3000	1583	1432	1706	2879	4673	3833	2743	3493	3123	2665	4202	4634
LOC105222152	40.06	43.25	41.17	39.33	38.49	44.54	52.87	47.06	45.63	45.67	44.59	42.45	45.91	40.92	37.73	39.56	45.26	46.34	44.01	42.53	43.84	42.83	45.64	41.82	44.14	1347	1229	1385	1156	1106	1181	1887	1119	1226	1401	1139	1309	1062	828	878	959	1407	1387	1029	1122	1128	1017	1460	1323
LOC105222153	0.04	0.14	0.04	0.09	0.05	0.05	0	0.23	0	0.26	0	0.09	0.23	0.13	0.12	0.11	0	0.04	0.23	0.05	0.05	0.11	0.13	0.34	0.2	1	3	1	2	1	1	0	4	0	6	0	2	4	2	2	2	0	1	4	1	1	2	3	8
LOC105222154	2.12	2.55	1.2	2.55	2.61	4.71	2.73	3.3	3.76	2.87	4.38	3.36	3.75	3.76	2.61	2.6	2.49	1.63	2.8	2.26	2.03	2.15	2.72	1.69	2.42	60	61	34	63	63	105	82	66	85	74	94	87	73	64	51	53	65	41	55	50	44	43	73	45
LOC105222155	1.18	0.29	0.38	1.69	1.07	2.42	1.6	1.1	2.02	1.47	3.4	1.44	0.94	3.84	1.67	1.45	1.02	2.18	1.31	1.89	2.81	1.49	1.81	1.17	1.77	44	9	14	55	34	71	63	29	60	50	96	49	24	86	43	39	35	72	34	55	80	39	64	41
LOC105222156	6.3	6.14	6.42	6.69	6.36	2.21	2.57	2.42	2.22	2.17	4.11	2.88	2.97	3.19	2.95	5.37	4.64	5.53	5.87	4.48	7.49	6.37	7.41	7.3	7.52	210	173	214	195	181	58	91	57	59	66	104	88	68	64	68	129	143	164	136	117	191	150	235	229
LOC105222157	59.54	76.73	70.8	60.64	76.79	13.56	14.77	12.84	12.79	14.23	8.73	9.39	7.06	7.07	9.49	12.57	12.63	12.59	13.79	16.58	17.31	16.55	14.6	15.43	19.2	4060	4421	4830	3614	4475	729	1069	619	697	885	452	587	331	290	448	618	796	764	654	887	903	797	947	990
LOC105222158	1.35	0.98	1.05	1.06	1.1	1.19	0.95	0.83	1.05	0.97	0.66	0.89	1.03	1.08	0.89	0.83	0.72	0.79	1.06	0.76	0.51	0.62	0.54	0.64	0.8	99	61	77	68	69	69	74	43	62	65	37	60	52	48	45	44	49	52	54	44	29	32	38	44
LOC105222159	15.3	14.75	14.72	13.45	14.16	8.84	10.51	8.66	9.53	9.45	11.68	13.79	11.93	12.08	11.29	13.74	13.46	13.55	13.61	16.29	16.66	17.77	18.16	17.41	18.27	830	676	792	638	656	373	597	328	408	460	480	683	444	391	428	534	679	648	517	698	688	674	933	876
LOC105222160	5.32	5.48	7.14	5.94	6.42	3.88	2.6	2.83	2.93	2.7	4.65	5.43	3.65	4.95	3.93	5.37	4	4.39	3.98	4.01	5.33	4.16	4.56	4.66	5.54	125	109	168	122	129	72	65	47	55	58	83	117	59	70	64	91	87	92	65	74	96	69	102	103
LOC105222161	15.38	11.74	13.36	12.59	13.69	13.48	17.13	12.49	13.73	12.68	10.7	11.95	9.61	10.96	11.72	18.92	19.08	18.96	17.2	21.23	23.23	22.33	23.08	21.63	21.56	1107	714	962	792	842	765	1309	636	790	833	585	789	476	475	584	982	1270	1215	861	1199	1280	1135	1581	1465
LOC105222162	2962.75	2856.43	2760.33	2983.01	2754.35	2990.26	2813.81	2778.58	2966.56	3009.53	2819.06	2760.91	2831.98	2831.6	2678.79	2658.32	2631.69	2693.01	2459.32	2402.01	2453.79	2431.22	2937.9	2685.57	2612.25	165236	134624	154028	145419	131283	131503	166589	109599	132201	153145	119443	141200	108653	95031	103384	106898	135710	133694	95368	105098	104729	95749	155876	140907
LOC105222163	0.88	0.68	0.9	0.81	0.92	1.41	1.3	1.46	1.37	1.38	1.18	1.17	1.22	0.83	1.08	1.75	1.49	1.1	1.71	1.39	1.95	1.6	1.79	2.16	1.91	46	30	47	37	41	58	72	54	57	66	47	56	44	26	39	66	72	51	62	57	78	59	89	106
LOC105222164	0	0	0.05	0.19	0	0.03	0.18	0.03	0.12	0	0.53	0.23	0.24	0.35	0.14	0.33	0.2	0.13	0.07	0.27	0.49	0.3	0.45	0.4	0.45	0	0	2	7	0	1	8	1	4	0	17	9	7	9	4	10	8	5	2	9	16	9	18	16
LOC105222165	2.77	2.48	2.53	3.02	2.03	1.07	1.35	0.9	0.95	1.3	1.23	1.59	1.17	1.13	1.23	1.47	1.8	1.4	1.73	1.81	2.7	2.27	2.77	2.36	2.5	378.75	287.03	346.6	361.13	236.97	115.12	196.72	87.26	104	162.2	127.33	200.01	110.13	92.81	116.58	145.03	227.43	170.65	164.88	194.68	282.6	219.22	359.85	303.33
LOC105222166	0.05	0.08	0	0.19	0.02	0.11	0.06	0.09	0.04	0.05	0.02	0.02	0	0	0.12	0.02	0	0.02	0.05	0.08	0.02	0	0.11	0.02	0.02	3	4	0	10	1	5	4	4	2	3	1	1	0	0	5	1	0	1	2	4	1	0	6	1
LOC105222167	13.67	12.73	11.65	13.2	12.18	19.66	26.07	19.12	23.29	20.12	22.68	27.18	18.62	18.7	26.8	24.48	26.11	19.56	22.1	26.08	22.13	22.96	25.62	22.11	24	330	259	281	278	251	366	656	320	440	434	408	589	301	266	440	418	569	414	362	485	402	382	573	491
LOC105222168	0.16	0	0.02	0.18	0.04	0	0.02	0.02	0.09	0.04	0.02	0.21	0.15	0.03	0.08	0	0.06	0.22	0.13	0.09	0.07	0.05	0.09	0.04	0.11	9	0	1	9	2	0	1	1	4	2	1	11	6	1	3	0	3	11	5	4	3	2	5	2
LOC105222169	105.35	102.59	108.94	92.77	105.47	80.31	81.39	70.73	76.97	76.22	59.91	65.28	51.82	53.71	53.56	68.68	73.36	59.91	68.47	69.36	66.73	63.87	78.37	70.8	69.08	4625	3806	4785	3560	3957	2780	3793	2196	2700	3053	1998	2628	1565	1419	1627	2174	2978	2341	2090	2389	2242	1980	3273	2924
LOC105222170	0	0	0	0	0	0	0	0	0	0	0	0	0	0	0	0	0	0	0	0	0	0	0	0	0	0	0	0	0	0	0	0	0	0	0	0	0	0	0	0	0	0	0	0	0	0	0	0	0
LOC105222171	0	0	0	0	0	0	0	0	0	0	0	0	0	0	0	0	0	0	0	0	0	0	0	0	0	0	0	0	0	0	0	0	0	0	0	0	0	0	0	0	0	0	0	0	0	0	0	0	0
LOC105222172	19.85	15.47	16.36	14.39	15.92	15.87	22.54	18.62	14.32	17.76	11.61	14.57	13.09	10.26	12.1	21.69	21.82	18.84	21.39	25.23	27.29	31.34	29.05	28.21	30.35	2231	1469	1839	1413	1529	1406	2689	1480	1286	1821	991	1501	1012	694	941	1757	2267	1884	1671	2224	2347	2487	3105	2982
LOC105222173	0	0.01	0	0	0.01	0.02	0	0.04	0.02	0	0.05	0	0.02	0.02	0	0	0	0.01	0	0	0	0	0.04	0.05	0.05	0	1	0	0	1	1	0	2	1	0	3	0	1	1	0	0	0	1	0	0	0	0	3	4
LOC105222174	95.42	95.78	113.93	103.92	113.82	93.03	78.62	80.42	76.5	67.39	61.8	73.01	64.72	63.2	63.99	71.3	73.66	65.57	69.62	69.05	67.74	70.36	81.03	82.72	78.45	3144	2667	3756	2993	3205	2417	2750	1874	2014	2026	1547	2206	1467	1253	1459	1694	2244	1923	1595	1785	1708	1637	2540	2564
LOC105222175	0	0.08	0	0	0	0.09	0	0	0.09	0	0	0.08	0	0	0	0	0.08	0	0.1	0.09	0	0	0	0	0	0	1	0	0	0	1	0	0	1	0	0	1	0	0	0	0	1	0	1	1	0	0	0	0
LOC105222176	26.9	24.95	25.42	25.24	23.4	16.64	17.43	19.48	15.8	16.29	18.08	18.18	19.44	17.86	18.7	22.15	22.95	24.15	23.88	23.56	23.83	21.43	24.47	25.01	25.99	1189	932	1124	975	884	580	818	609	558	657	607	737	591	475	572	706	938	950	734	817	806	669	1029	1040
LOC105222177	0.02	0.08	0.07	0.03	0.08	0	0	0	0.03	0.03	0	0	0	0	0	0	0	0.03	0	0	0	0	0.02	0.05	0	1	3	3	1	3	0	0	0	1	1	0	0	0	0	0	0	0	1	0	0	0	0	1	2
LOC105222178	2.72	2.59	3.07	2.79	2.75	1.67	2.1	1.55	1.51	1.75	1.62	1.76	1.47	1.37	1.63	3.02	3.08	2.91	3.43	3.55	3.31	2.96	2.67	2.95	2.99	647	520	730	581	560	314	530	261	287	380	292	383	241	196	268	519	678	617	567	662	602	497	605	660
LOC105222179	7.75	6.39	7.02	6.56	6.42	2.2	4.52	1.86	2.42	2.68	4.1	4.38	2.41	2.86	4.12	7.83	8	8.08	8.76	10.35	10.82	10.54	9.98	9.98	11.47	735	517	671	548	522	164	458	126	184	234	297	381	158	165	270	539	703	684	581	772	788	709	904	894
LOC105222180	0.17	0.3	0.13	0.14	0.2	0.21	0.28	0.18	0.16	0.55	0.28	0.36	0.36	0.28	0.3	0.7	0.27	0.56	0.84	0.64	0.66	0.41	0.66	0.8	0.79	4	6	3	3	4	4	7	3	3	12	5	8	6	4	5	12	6	12	14	12	12	7	15	18
LOC105222181	9.58	8.55	8.24	7.2	8.83	6.3	9.23	5.8	7.09	8.72	8.6	9.2	6.7	9.1	8.89	11.26	10.95	13.6	12.64	13.47	15.78	13.99	14.31	14.47	14.85	598	451	515	393	471	310	612	256	354	497	408	527	288	342	384	507	632	756	549	660	754	617	850	850
LOC105222182	12.55	10.5	11.69	10.71	11.64	2.19	4.55	2.41	2.52	2.69	4.12	5.47	3.22	2.73	3.7	7.97	7.16	7.89	7.39	8.05	9.34	10.58	8.69	10.06	10.15	618	437	576	461	490	85	238	84	99	121	154	247	109	81	126	283	326	346	253	311	352	368	407	466
LOC105222183	510	532.36	521.09	514.68	512.15	295.68	319.3	263.34	283.71	307.09	284.32	299.6	291.05	281.15	277.37	326.38	319.82	310.95	311.58	322.37	333.06	350.08	381.04	370.73	373.54	17550	15481	17941	15481	15062	8023	11664	6409	7801	9642	7433	9454	6890	5822	6605	8098	10176	9525	7455	8703	8771	8507	12474	12002
LOC105222184	16.31	10.66	8.93	15.17	10.54	39.48	35.34	28.88	40.2	42.64	20.07	18.17	12.47	20.5	26.85	23.41	13.57	20.15	25.6	26.85	20.94	24.7	18.41	19.82	26.82	230	127	126	187	127	439	529	288	453	546	215	235	121	174	262	238	177	253	251	291	226	246	247	263
LOC105222185	327.08	337.63	387.38	341.96	356.77	291.5	286.43	274.61	316.47	327.04	302.86	296.33	290.64	324.05	316.92	354.53	294.07	309.68	314.12	326.19	359.55	371.13	291.53	350.65	349.04	5827	5083	6905	5325	5432	4095	5417	3460	4505	5316	4099	4841	3562	3474	3907	4554	4844	4911	3891	4559	4902	4669	4941	5877
LOC105222186	97.32	94.89	94.17	100.01	95	151.29	137.72	158.19	151.32	141.21	141.93	137.56	145.84	139.84	140.19	143.08	131.85	141.46	136.77	129.22	135.03	135.84	128.56	132.51	140.23	2232	1839	2161	2005	1862	2736	3353	2566	2773	2955	2473	2893	2301	1930	2225	2366	2796	2888	2181	2325	2370	2200	2805	2859
LOC105222187	0	0	0	0.04	0	0	0	0	0	0	0	0	0	0	0	0	0	0	0	0	0	0	0	0	0	0	0	0	2	0	0	0	0	0	0	0	0	0	0	0	0	0	0	0	0	0	0	0	0
LOC105222188	1	1.11	1.17	0.89	1.25	1.6	3.05	2.34	2.43	1.31	2.13	2.19	2.87	2.75	2.25	2.88	2.49	2.26	2.24	3.51	2.29	2.71	3	3.1	3.48	31	29	36	24	33	39	100	51	60	37	50	62	61	51	48	64	71	62	48	85	54	59	88	90
LOC105222189	5.31	6.29	7.9	5.55	7.5	10.74	11.2	12.63	10.06	10.04	11.49	11.08	11	10.81	10.51	10.82	10.49	10.03	10.6	11.26	11.24	10.72	11.87	11.68	9.24	160	160	238	146	193	255	358	269	242	276	263	306	228	196	219	235	292	269	222	266	259	228	340	331
LOC105222190	0.32	0	0	0.72	0.18	0	0.74	0	0.59	0	0.21	0.34	0.46	0	0.23	0.44	0	0	0.23	0.6	0.62	0.89	0	0.34	0.6	2	0	0	4	1	0	5	0	3	0	1	2	2	0	1	2	0	0	1	3	3	4	0	2
LOC105222191	23.02	23.08	24.35	24.65	23.65	10.36	14.07	11.31	10.07	11.84	16.43	15.16	12.47	13.22	14.45	19.22	18.16	18.03	20.42	19.77	21.81	19.21	17.06	18.31	19.08	900	761	950	838	789	317	583	313	315	421	486	542	335	310	390	540	656	625	554	604	648	529	630	669
LOC105222192	10.33	12.74	10.83	11.36	10.55	4.87	7.94	5.93	6.83	6.06	8.36	8.13	8.05	7.61	8.79	10.9	10.63	11.99	11.83	10.68	12.72	13.23	8.84	12.3	12.82	320	334	344	316	286	115	268	132	173	172	200	237	166	144	193	249	310	337	258	266	307	294	250	342
LOC105222193	15.25	17.11	17.57	15.29	16.23	8.22	8.43	6.95	8.84	9.26	10.12	10.02	9.97	10.86	10.64	13.35	12.87	13.69	13.13	14.26	16.04	14.39	14.14	15.81	15.31	518	491	597	454	471	220	304	167	240	287	261	312	233	222	250	327	404	414	310	380	417	345	457	505
LOC105222194	0.25	0.38	0.33	0.29	0.43	0.67	0.69	0.65	0.74	0.63	1.13	0.87	1.06	1.35	1.24	1.39	1.7	1.31	1.49	1.36	1.81	1.29	1.37	1.86	2.01	16	20	21	16	23	33	46	29	37	36	54	50	46	51	54	63	99	73	65	67	87	57	82	110
LOC105222195	2.74	2.78	4.41	3.14	2.52	1.86	2.4	0.69	1.84	1.83	1.68	2.24	2.14	2.77	3.12	2.72	1.59	2.53	2.54	2.5	2.69	4.72	2.99	2.6	4.59	28	24	45	28	22	15	26	5	15	17	13	21	15	17	22	20	15	23	18	20	21	34	29	25
LOC105222196	619.26	653.17	632.92	617.04	603.66	578.25	614.92	615.53	578.17	593.91	560.97	580.24	616.41	598.03	583.43	497.41	569.68	492.7	511.9	501.05	433.46	424.83	504.76	483.89	446.34	23440	20903	23973	20423	19531	17264	24715	16478	17489	20516	16140	20150	16056	13630	15287	13587	19948	16609	13483	14885	12565	11362	18188	17245
LOC105222197	30.29	31.23	34.22	30.33	34.67	21.72	20.6	18.14	19.18	18.15	20.5	18.45	16.63	20.15	17.6	19.63	18.08	18.23	17.75	18.8	31.41	19.6	25.88	19.3	18.31	2241	1935	2510	1959	2106	1237	1591	938	1107	1242	1104	1181	866	857	865	980	1152	1151	859	1028	1721	993	1686	1290
LOC105222198	4.32	4.13	3.75	3.96	4.06	1.64	2.58	1.57	2.14	2.06	2.3	2.48	1.72	1.65	2.27	3.35	2.64	2.77	3.17	3.41	3.48	3.87	3.65	3.92	4.08	780	631	678	625	627	234	496	201	309	340	316	411	214	180	284	436	442	446	399	484	482	494	627	666
LOC105222199	34.14	30.91	27.84	31.25	27.9	51.54	44.11	45.82	71.62	55.59	50.5	49.05	36.39	49.71	64.69	49.3	36.57	49.31	41.15	42.97	41.36	37.45	31.67	30.07	36.34	315	241	257	252	220	375	432	299	528	468	354	415	231	276	413	328	312	405	264	311	292	244	278	261
LOC105222200	15.57	14.33	12.78	14.51	14.8	5.14	6.13	4.42	5.47	5.88	5.29	5.4	4.39	5.71	5.06	5.29	5.23	5.73	5.17	6.69	5.63	5.49	5.48	5.26	4.85	958.67	745.59	787.71	781.25	779.16	249.7	401.05	192.53	269.07	330.61	247.43	305.01	185.98	211.54	215.49	234.75	297.61	313.93	221.45	323.26	265.41	238.92	321.32	304.93
LOC105222201	19.17	18.48	19.37	18.5	19.55	15.1	15.31	14.17	14.41	14.63	14.79	14.69	12.06	12.44	15.56	18.47	18.96	17.23	18.53	19.63	19.7	17.52	18.2	17.83	19.77	1146.33	969.41	1184.29	955.75	991.84	717.3	995.95	585.47	681.93	803.39	671.57	816.99	496.02	453.46	653.51	812.25	1049.39	933.07	793.55	922.74	904.59	750.08	987.68	1002.07
LOC105222202	23.08	20.28	20.8	18.37	21.02	15.24	32.57	17.19	27.54	36.5	31.85	36.55	15.51	26.4	43.97	60.28	32.21	51.54	45.86	84.98	95.71	93.86	59.94	76.81	87.44	1659	1232	1496	1154	1291	864	2485	874	1582	2394	1739	2409	767	1142	2187	3124	2141	3298	2292	4792	5265	4764	4099	5194
LOC105222204	0.01	0	0	0	0	0	0	0	0	0	0	0	0	0	0	0.01	0	0	0	0.02	0	0.01	0.01	0.04	0	2	0	0	0	0	0	0	0	0	0	0	0	0	0	0	1	0	0	0	2	0	1	2	6
LOC105222205	0.03	0	0	0	0	0	0.03	0	0	0	0	0.03	0	0	0	0	0	0	0	0	0	0.04	0	0	0	1	0	0	0	0	0	1	0	0	0	0	1	0	0	0	0	0	0	0	0	0	1	0	0
LOC105222206	0	0	0	0	0	0	0	0	0	0	0	0	0	0.05	0	0.04	0	0	0	0	0	0	0	0.07	0.04	0	0	0	0	0	0	0	0	0	0	0	0	0	1	0	1	0	0	0	0	0	0	0	2
LOC105222207	0.6	0.52	0.61	0.63	0.57	0.54	0.37	0.28	0.3	0.41	0.52	0.59	0.57	0.39	0.65	1.17	0.97	1.02	0.9	0.67	1.07	0.93	0.8	0.99	1.28	74	54	75	68	60	52	48	24	29	46	49	66	48	29	55	104	110	112	77	65	101	81	94	115
LOC105222208	0.38	0.16	0.74	0.23	0.83	0.16	0	0	0.32	0.2	0.27	0.29	1.01	0.08	0.27	0.72	0.68	0.59	0.78	0.67	1.07	0.68	0.79	0.5	0.4	6	3	14	4	13	2	0	0	4	4	4	5	11	1	3	10	10	9	10	9	13	9	14	9
LOC105222209	49.49	48.52	48.83	48.82	48.43	69.18	68.92	57	76.38	85.3	72.07	73.3	61.24	80.37	86.07	78.93	67.66	79.98	72.53	84.24	85.21	84.21	77.01	80.27	77.84	1008	835	995	869	843	1111	1490	821	1243	1585	1115	1369	858	985	1213	1159	1274	1450	1027	1346	1328	1211	1492	1538
LOC105222210	14.16	14.2	13.03	12.81	13.57	21.42	22.72	21.05	25.66	26.56	24.56	24.42	23.45	24.14	26.09	21.54	20.79	20.06	20.77	19.33	22.39	22.1	22.56	23.5	22.64	353	299	325	279	289	421	601	371	511	604	465	558	402	362	450	387	479	445	360	378	427	389	535	551
LOC105222211	56.08	58.53	65.89	64.7	62.03	82.91	78.65	79.96	92.96	90.99	79	69.83	71.68	70.03	78.31	73.19	66.36	64.24	63.33	65.66	65.67	71.72	60.19	60.95	58.9	712	628	837	718	673	830	1060	718	943	1054	762	813	626	535	688	670	779	726	559	654	638	643	727	728
LOC105222212	66.71	69.17	62.65	68.65	68.21	52.82	61.35	49.38	45.6	47.93	85.81	76.45	87.49	76.46	68.81	95.62	105.32	104.28	98.81	91.43	103.34	102.15	119.42	113.95	111.65	4724	4139	4439	4249	4128	2949	4612	2473	2580	3097	4616	4964	4262	3258	3372	4882	6896	6573	4865	5079	5600	5108	8045	7591
LOC105222213	1.97	1.69	1.62	1.66	1.56	0.6	0.95	0.81	0.46	0.54	0.88	0.49	0.49	0.52	0.84	1	1.1	0.76	1.04	0.97	0.96	1.21	1.17	1.23	1.08	145	105	119	107	98	35	74	42	27	36	49	33	25	23	43	53	75	50	53	56	54	63	82	85
LOC105222214	8.62	9.17	8.26	9.58	8.14	4.88	5.81	6.02	5.91	4.99	5.39	5.12	6.19	6.44	5.16	5.98	5.84	6.25	6.16	6.85	7.41	7.45	6.91	7.16	6.8	316	284	303	307	255	141	226	156	173	167	150	172	156	142	131	158	198	204	157	197	208	193	241	247
LOC105222215	3.07	3.24	2.99	3.88	2.56	2.18	2.15	1.7	2.76	2.42	3.24	2.47	2.1	3.15	3.59	2.48	2.17	2.15	3.28	3.23	3.67	2.71	2.4	2.87	2.91	168	150	164	186	120	94	125	66	121	121	135	124	79	104	136	98	110	105	125	139	154	105	125	148
LOC105222216	1.27	1.33	1.42	0.91	0.95	1.19	1.14	1.54	1.09	0.69	2.36	2.01	2.29	2.74	1.95	3.43	4	3.48	3.36	4.24	4.44	3.93	5.37	5.71	4.85	130	115	145	81	83	96	123	111	89	64	183	188	161	168	138	252	377	316	238	339	347	283	521	548
LOC105222217	0	0	0	0	0	0.17	0	0	0	0	0	0	0	0	0	0	0	0	0	0	0	0	0	0	0	0	0	0	0	0	2	0	0	0	0	0	0	0	0	0	0	0	0	0	0	0	0	0	0
LOC105222218	9.99	10.8	10.79	11.6	10.06	14.23	12	13.14	14.33	13.84	13.59	12.97	13.48	12.24	11.83	14.14	13.5	12.12	12.53	12.06	10.8	12.34	14.54	12.05	13.7	533	487	576	541	459	599	680	496	611	674	551	635	495	393	437	544	666	576	465	505	441	465	738	605
LOC105222219	4.43	4.08	4.98	4.98	4.61	2.47	2.56	2.08	2.24	2.42	1.32	1.76	1.38	1.27	1.6	2.8	2.06	2.59	2.54	2.76	2.49	2.08	1.82	2.17	1.85	261	200	292	255	237	115	157	91	105	132	60	92	55	47	65	118	112	140	103	127	109	87	100	125
LOC105222220	40.99	47.2	41.38	41.09	40.31	34.58	34	35.31	32.03	32.67	34.38	32.94	34.71	32.85	32.02	32.4	29.95	32.73	31.91	29.1	26.56	25.22	33.92	31.69	29.81	1636	1592	1652	1433	1374	1088	1440	996	1021	1189	1042	1205	953	789	884	933	1105	1163	885	912	811	711	1287	1190
LOC105222221	6.02	6.79	6.77	7.37	6.65	3.82	4.87	2.7	4.01	4.28	5.7	6.16	3.68	5.61	5.81	9.05	7.45	7.61	7.97	8.89	9.56	10.47	9.9	9.57	11.6	214	204	241	229	202	107	184	68	114	139	154	201	90	120	143	232	245	241	197	248	260	263	335	320
LOC105222222	10.66	9.64	8.25	10.91	9.26	7.85	8.95	8.35	11.79	13.81	10.98	12	8.11	13.24	13.96	14.1	8.3	11.68	14.18	16.96	21.56	22.24	14.89	19.21	20.98	653	499	506	584	485	379	582	362	577	772	511	674	342	488	592	623	470	637	604	815	1011	962	868	1107
LOC105222224	12.65	14.08	14.42	12.33	14.04	14.62	14.87	15.24	13.57	14.03	15.37	15.64	16.9	14.84	13.91	23.07	18.62	19.55	21.45	18.98	20.19	20.38	21.93	24.15	24.93	742	700	846	634	707	676	922	626	639	753	683	848	683	525	565	971	1004	1018	877	868	901	840	1225	1331
LOC105222225	1.18	1.84	1.37	1.86	1.6	5.61	4.98	4.86	4.38	5.54	5.91	4.34	2.87	4.92	4.6	5.6	3.75	4.79	4.94	4.38	5.4	5.32	6.72	5.07	5.27	37	49	43	51	43	139	166	108	110	159	141	125	62	93	100	127	109	134	108	108	130	118	201	150
LOC105222226	0.46	0.3	0.58	0.39	0.5	0.33	0.51	0.27	0.34	0.65	0.17	0.47	0.21	0.17	0.36	0.6	0.75	0.53	1.15	0.99	1.01	0.43	0.91	1	1.14	50	28	63	37	47	28	59	21	30	65	14	47	16	11	27	47	76	51	87	85	84	33	94	103
LOC105222227	10.96	9.9	9.76	9.49	10.45	9.26	10.58	10.04	10.18	9.75	10.62	12.39	8.96	10.08	9.73	9.43	10.99	9.73	9.35	11.22	11.37	12.7	12.47	13.25	12.61	329	251	293	249	268	219	337	213	244	267	242	341	185	182	202	204	305	260	195	264	261	269	356	374
LOC105222228	36.86	35.26	34.42	36.8	33.3	69.56	70.48	67.33	86.6	93.56	66.1	64.51	53.18	67.06	68.2	55.26	45.42	57.25	57.18	57.8	64.56	59.22	51.78	54.84	53.7	1233	997	1152	1076	952	1835	2503	1593	2315	2856	1680	1979	1224	1350	1579	1333	1405	1705	1330	1517	1653	1399	1648	1726
LOC105222229	0.23	0.43	0.37	0.42	0.43	0.12	0.13	0	0	0.1	0.18	0	0	0.08	0.13	0.25	0.05	0	0.2	0.12	0.12	0.13	0.1	0.39	0.29	5	8	8	8	8	2	3	0	0	2	3	0	0	1	2	4	1	0	3	2	2	2	2	8
LOC105222230	14.18	15.68	16.43	14.17	16.28	17.65	17.81	19.2	26.58	23.49	19.54	20.98	20.42	22.35	30.21	27.05	14.62	22.44	20.3	24.01	25.84	33.66	24.7	28.45	31.33	213	199	247	186	209	209	284	204	319	322	223	289	211	202	314	293	203	300	212	283	297	357	353	402
LOC105222231	3.07	2.65	2.38	2.64	2.4	2.78	2.8	2.67	2.5	2.72	2.7	2.8	2.47	2.87	2.39	2.36	2.23	2.68	2.69	2.57	2.55	2.72	2.19	2.82	2.6	339	247	263	255	227	242	328	209	221	274	227	284	188	191	183	188	228	264	207	223	216	212	230	293
LOC105222232	0.64	0.35	0.38	0.97	0.4	0.7	0.52	0.84	0.58	0.37	0.17	0.05	0.62	0.56	0.12	0.29	0.14	0.53	0.18	0.11	0.28	0.42	0.27	0.23	0.11	15	7	9	20	8	13	13	14	11	8	3	1	10	8	2	5	3	11	3	2	5	7	6	5
LOC105222233	21.14	23.6	21.13	23.28	21.11	33.66	21.93	22.36	25.06	24.13	24.06	24.53	22.87	26.81	24.35	29.21	23.72	20.89	20.12	19.25	20.35	20.48	25.23	17.23	24.83	266	251	266	256	227	334	293	199	252	277	230	283	198	203	212	265	276	234	176	190	196	182	302	204
LOC105222236	0	0	0	0.04	0	0.04	0	0.14	0.04	0.11	0	0.04	0.05	0.11	0.05	0.18	0.21	0	0.05	0.25	0	0	0.03	0.14	0.12	0	0	0	1	0	1	0	3	1	3	0	1	1	2	1	4	6	0	1	6	0	0	1	4
LOC105222238	6.67	6.81	6.18	6.76	7.74	4.24	4.37	3.73	4.44	4.07	5.45	7.49	5.29	6.42	6.39	9.63	7.87	7.62	8.76	9.54	9.42	9.97	11.99	9.97	11.66	359	310	333	318	356	180	250	142	191	200	223	370	196	208	238	374	392	365	328	403	388	379	614	505
LOC105222239	1.33	1.09	1.7	1.22	1.47	2.45	2.81	2.12	2.02	2.58	2.09	2.15	2.33	2.71	2.46	2.88	3.46	3.69	3.32	4.06	4.24	3.39	3.76	4.28	4.09	92	64	118	74	87	134	207	104	112	163	110	137	111	113	118	144	222	228	160	221	225	166	248	279
LOC105222240	157.49	146.87	150.38	137.61	143.15	133.81	146.69	125.19	133.47	134.63	143.65	139.53	130.47	136.17	146.42	146.14	157.27	155.07	143.38	152.05	145.76	152.64	173.46	168.31	154.42	2218	1748	2119	1694	1723	1486	2193	1247	1502	1730	1537	1802	1264	1154	1427	1484	2048	1944	1404	1680	1571	1518	2324	2230
LOC105222241	30.24	25.91	27.41	24.61	25.74	34.84	34.76	30.65	37.23	35.81	30.32	35.64	33.72	33.05	35.24	38.33	31.36	36.53	34.14	32.74	34.84	36.84	38.11	35.94	39.97	558	404	506	397	406	507	681	400	549	603	425	603	428	367	450	510	535	600	438	474	492	480	669	624
LOC105222242	41.56	41.93	47.95	45.13	42.28	22.6	21.9	19.82	21.33	22.08	22.9	28.5	25.19	23.3	23.41	21.69	24.76	23.5	22.19	22.9	26.33	24.94	19.92	26.28	23.26	590	503	681	560	513	253	330	199	242	286	247	371	246	199	230	222	325	297	219	255	286	250	269	351
LOC105222243	9.86	12.08	10.93	11.48	10.39	2.83	6.31	4.93	5.38	4.3	6.66	7.72	5.44	5.46	6.62	9.42	7.59	8.96	9.56	10.21	10.43	11.3	10.26	12.77	12.22	340	352	377	346	306	77	231	120	148	135	174	244	129	113	158	234	242	275	229	276	275	275	336	414
LOC105222245	1.67	2.73	2.44	1.99	2.39	3.05	3.46	2.79	3.43	3.44	3.83	2.73	2.92	2.28	2.61	3.15	2.57	2.78	3.32	2.73	3.58	3.5	2.88	3.34	3.43	50	69	73	52	61	72	110	59	82	94	87	75	60	41	54	68	71	74	69	64	82	74	82	94
LOC105222246	18.03	17.33	16.38	15.77	17.81	15.49	16.39	14.16	15.88	15.02	18.69	18.22	18.01	19.41	16.96	24.89	22.17	23.08	23.15	25.89	23.44	23.58	23.68	25.68	24.67	1951	1585	1774	1492	1647	1322	1883	1084	1373	1483	1537	1808	1341	1264	1270	1942	2218	2223	1742	2198	1941	1802	2438	2615
LOC105222247	133.55	146.27	126.3	157.12	129.17	302.57	392.05	207.73	218.32	178.53	299.98	258.41	215.06	234.32	233.23	258.14	206.71	242.99	226.62	198.33	266.4	240.79	265.59	314.52	266.52	3386	3134	3204	3482	2799	6049	10552	3725	4423	4130	5778	6008	3751	3575	4092	4719	4846	5484	3995	3945	5169	4311	6406	7502
LOC105222248	0.52	0.55	0.31	0.61	0.6	0.31	0.57	0.15	0.41	0.3	0.63	0.35	0.45	0.27	0.29	0.81	0.93	0.62	0.84	0.98	0.72	0.57	0.59	0.93	0.9	45	40	27	46	42	21	52	9	28	22	41	26	26	14	17	50	71	47	50	66	47	34	46	74
LOC105222249	153.08	140.38	137.42	139.62	139.02	94.12	98.69	94.87	96.04	103.24	106.13	96.16	106.68	110.79	106.16	107.52	99.1	98.19	102	105.54	105.32	99.39	107.48	97.8	100.62	6711.66	5201.12	6028.23	5350.77	5209.28	3254.04	4593.57	2941.73	3364.76	4130	3535.14	3866.11	3217.77	2922.99	3220.82	3399.07	4017.6	3832.13	3109.62	3630.15	3533.84	3077.12	4482.93	4034.04
LOC105222250	12.02	10.72	9.62	12.02	11.26	16.05	15.83	15.01	17.47	17.42	18.69	15.64	21.23	21.33	17.16	18.95	18.1	19.26	20.4	16.77	20.07	19.29	22	22.2	21.11	334.34	251.88	267.77	292.23	267.72	351.96	467.43	295.27	388.24	442	394.86	398.89	406.23	357.01	330.18	379.93	465.4	476.87	394.38	365.85	427.16	378.88	582.07	580.96
LOC105222251	0.12	0	0	0.41	0	0	0	0	0	0.26	0.16	0.13	0	0.2	0	0	0	0	0.34	0.45	0.15	0.17	0.12	0	0.75	1	0	0	3	0	0	0	0	0	2	1	1	0	1	0	0	0	0	2	3	1	1	1	0
LOC105222252	4.46	4	4.74	3.27	3.42	2.39	3.14	1.73	2.77	2.15	2.36	2.67	2.54	3	3.02	3.27	3.28	4.02	3.53	3.64	4.62	4.23	4.87	5.71	4.97	284	215	302	182	186	120	212	78	141	125	114	156	111	115	133	150	193	228	156	182	225	190	295	342
LOC105222253	195.22	191.28	182.9	192.91	186.58	172.12	170.8	175.46	181.11	175.55	166.28	159.32	159.33	149.03	145.76	133.65	135.23	132.17	124.3	117.17	112.46	121.99	132.13	126.02	124.64	4529	3746	4245	3915	3698	3149	4206	2879	3358	3714	2929	3394	2544	2082	2340	2236	2899	2730	2005	2132	2000	1997	2918	2751
LOC105222254	4.6	5.02	3.9	4.36	4.32	2.68	4.11	2.47	3.3	2.79	4.85	5.58	3.54	2.71	4.53	4.57	6.84	7.1	6.2	6.32	6.08	6.46	6.52	5.32	6.54	156.2	132.09	141	138	122.14	76.45	158	63.14	85.83	92	133.21	174.63	88	59	113.38	119.32	205.2	148.74	156	140.54	168.41	154.38	224.38	181
LOC105222255	11.73	10.01	10.71	13.43	11.58	27.49	16.18	14.72	20.7	18.96	18.38	13.63	9.39	11.46	7.37	9.65	10.25	8.63	8.75	9.62	8.88	11.84	10.58	9.57	10.3	438.8	315.91	399	439	369.86	807.55	639	386.86	615.17	646	519.79	465.37	241	258	190.62	258.68	352.8	285.26	226	280.46	254.59	311.62	374.62	337
LOC105222256	0.03	0.17	0	0.05	0	0.03	0	0	0	0.03	0	0.12	0	0	0.04	0.03	0.12	0	0	0	0.18	0.08	0.06	0.12	0.03	1	7	0	2	0	1	0	0	0	1	0	4	0	0	1	1	4	0	0	0	5	2	3	4
LOC105222257	6.18	6.13	6.05	6.58	6.62	2.39	2.84	2.6	2.48	2.94	2.59	2.64	2.77	3.29	3.26	4.3	3.96	3.82	3.91	3.61	3.36	3.35	3.21	3.38	3.37	557	467	549	517	511	170	273	166	180	242	178	219	171	180	205	280	330	306	247	256	232	214	276	286
LOC105222258	99.35	99.57	99.3	100.26	99.94	75.8	99	76.12	86.52	90.03	101.32	104.43	109.54	96.32	98.3	106.36	110.92	111	98.56	102.36	104.31	107.47	113.77	117.01	105.98	3130	2651	3130	2761	2691	1883	3311	1696	2178	2588	2425	3017	2374	1826	2143	2416	3231	3113	2159	2530	2515	2391	3410	3468
LOC105222259	49.35	41.27	43.54	49.14	51.44	56.95	56.89	57.69	64.71	69.73	61.59	58.15	54.71	57.73	70.05	67.89	58.11	60.51	64.1	63.68	67.74	60.93	54.5	57.68	61.5	733	518	647	638	653	667	897	606	768	945	695	792	559	516	720	727	798	800	662	742	770	639	770	806
LOC105222260	21.87	16.08	18.37	15.99	18.78	29.87	24.26	29.65	37.09	27.09	34.07	27.24	34.81	31.4	31.24	30.16	33.04	25.59	30.34	23.1	29.09	25.11	29.39	31.64	37.01	169	105	142	108	124	182	199	162	229	191	200	193	185	146	167	168	236	176	163	140	172	137	216	230
LOC105222262	18.33	19.69	20.2	19.55	19.13	11.8	15.13	13.25	13.44	14.46	14.35	15.33	15.1	15.52	14.19	15.12	14.62	16.11	15.04	14.5	17.91	17.78	17.66	19.01	19.03	575	522	634	536	513	292	504	294	337	414	342	441	326	293	308	342	424	450	328	357	430	394	527	561
LOC105222263	21.03	16.52	17.18	17.06	17.14	10.05	15.64	9.9	10.53	11.53	12.87	14.63	7.57	10.79	12.72	20	18.07	19.07	18.57	24.69	27.51	26.91	24.85	26.07	27.11	1127	750	922	800	785	425	888	375	451	564	523	719	279	347	470	772	895	908	690	1036	1126	1018	1267	1313
LOC105222264	8.01	9.76	6.93	9.71	9.51	14.86	8.45	14.54	17.96	16.12	11.8	14.6	10.43	15.3	10.19	11.77	12.8	11.01	12.55	10.82	8.59	10.84	14.45	13.47	11.04	67	69	58	71	68	98	75	86	120	123	75	112	60	77	59	71	99	82	73	71	55	64	115	106
LOC105222265	7.73	9	7.83	8.6	8.99	2.14	2.41	1.87	2.9	3.04	2.51	2.53	2.88	3.94	2.93	3.48	2.34	2.82	4.02	3.43	3.66	4.26	3.58	3.53	4.01	293	288	297	285	291	64	97	50	88	105	72	88	75	90	77	95	82	95	106	102	106	114	129	126
LOC105222266	7.2	7.51	8.37	8.98	10.41	8.88	8.26	9.16	8.43	7.31	7.92	11.7	6.94	9.02	10.68	9.62	9.41	10.14	10.45	8.67	9.66	9.17	8.05	9.11	9.35	110	97	128	120	136	107	134	99	103	102	92	164	73	83	113	106	133	138	111	104	113	99	117	131
LOC105222268	33.75	30.3	29.08	33.2	29.56	6.51	11.16	7.07	9.51	10.35	15.68	15.08	10.55	12.29	16.52	19.18	18.21	18.38	18.8	18.24	25.94	19.29	22.16	23.21	20.79	493	374	425	424	369	75	173	73	111	138	174	202	106	108	167	202	246	239	191	209	290	199	308	319
LOC105222269	54.22	50.98	54.33	51.61	49.63	32.02	39.74	32.36	36.59	36.82	45.28	42.73	48.36	44.56	43.41	43.28	44.54	50.15	47.41	44.95	50.95	49.42	54.2	54.17	51.64	1630	1295	1634	1356	1275	759	1268	688	879	1010	1034	1178	1000	806	903	938	1238	1342	991	1060	1172	1049	1550	1532
LOC105222270	34.56	33.96	34.27	35.45	34.24	22.8	24.93	25.58	22.43	24.36	28.37	29.71	26.46	27.19	29.61	30.12	26.15	29.73	34.29	33.67	27.29	27.83	25.06	28.49	26.99	619	514	614	555	524	322	474	324	321	398	386	488	326	293	367	389	433	474	427	473	374	352	427	480
LOC105222271	0.03	0.12	0.07	0.04	0.08	0.31	0	0.05	0.35	0.11	0.05	0.04	0.05	0.23	0.25	0.05	0	0.04	0.1	0.09	0	0.05	0.04	0.04	0.04	1	3	2	1	2	7	0	1	8	3	1	1	1	4	5	1	0	1	2	2	0	1	1	1
LOC105222272	0	0	0	0	0	0	0	0	0	0	0	0	0	0	0	0	0	0	0.09	0	0	0	0	0	0	0	0	0	0	0	0	0	0	0	0	0	0	0	0	0	0	0	0	2	0	0	0	0	0
LOC105222273	0	0	0	0	0	0	0	0	0	0	0.03	0	0	0	0	0	0	0.05	0	0	0	0	0	0	0	0	0	0	0	0	0	0	0	0	0	1	0	0	0	0	0	0	2	0	0	0	0	0	0
LOC105222274	0	0	0	0	0	0	0	0	0	0	0	0	0	0	0	0	0	0	0	0	0	0	0	0	0	0	0	0	0	0	0	0	0	0	0	0	0	0	0	0	0	0	0	0	0	0	0	0	0
LOC105222275	0	0	0.01	0	0	0.05	0.04	0	0	0	0.04	0	0	0.02	0	0	0.03	0.03	0.06	0.07	0.04	0	0.01	0.13	0.03	0	0	1	0	0	3	3	0	0	0	2	0	0	1	0	0	2	2	3	4	2	0	1	9
LOC105222276	1.63	1.66	2.27	2.14	2.25	5.25	6.21	3.22	7.3	9.46	6.99	4.96	2.97	5.43	9.7	10.68	6.31	7.14	8.06	12.57	11.51	12.23	7.79	9.36	9.45	28	24	39	32	33	71	113	39	100	148	91	78	35	56	115	132	100	109	96	169	151	148	127	151
LOC105222278	1.98	1.43	1.67	1.75	1.55	0.42	1.46	1.02	1.1	0.68	1.72	1.5	0.86	1.06	1.38	2.5	1.88	2.22	2	2.34	2.65	2.6	3.12	3.17	3.25	124	76	105	96	83	21	97	45	55	39	82	86	37	40	60	113	109	124	87	115	127	115	186	187
LOC105222280	5.38	5.42	5.24	5.65	5.11	1.7	3.01	2.23	1.74	2.29	3.19	3.92	2.7	3.01	3.06	4.69	4.68	4.28	4.6	4.88	5.8	6.22	5.71	5.85	6.33	229	195	223	210	186	57	136	67	59	89	103	153	79	77	90	144	184	162	136	163	189	187	231	234
LOC105222281	5.71	4.56	4.84	4.21	3.8	3.27	4.92	3.24	4.17	3.88	5.08	5.38	5.61	4.96	5.32	6.88	6.49	6.12	6.8	7.17	9.21	7.43	10.39	9	8.99	197	133	167	127	112	89	180	79	115	122	133	170	133	103	127	171	207	188	163	194	243	181	341	292
LOC105222282	0.99	1.41	1.27	0.78	1.29	0.54	1.01	0.64	0.64	0.59	1.12	0.8	0.78	1.46	1.02	1.02	1.56	0.92	1.63	1.77	1.52	1.36	1.79	1.44	1.25	35	42	45	24	39	15	38	16	18	19	30	26	19	31	25	26	51	29	40	49	41	34	60	48
LOC105222283	9.95	6.53	8.13	7.77	8.51	3.07	5.83	2.88	3.78	3.24	5.84	5.66	3.37	4.88	4.79	8.62	8.47	9.14	9.08	8.79	9.37	12.19	12.24	11.4	12.87	498	276	407	340	364	121	310	102	151	148	222	260	116	147	166	311	392	407	316	345	359	431	583	537
LOC105222284	3.68	2.99	3.17	6.52	4.36	1.83	2.33	2.18	1.72	1.4	2.44	2.26	2.03	1.56	1.77	1.7	2.34	2.19	2.35	1.81	1.63	1.43	3.46	3.02	2.43	153	105	132	237	155	60	103	64	57	53	77	86	58	39	51	51	90	81	68	59	52	42	137	118
LOC105222285	257.17	196.92	210.82	220.28	198.56	512.69	381.57	404.66	528.96	425.37	400.4	391.73	385.29	401.17	506.96	355.76	362.51	348.37	354.18	344.04	289.02	300.94	302.36	312.17	326.52	1958	1267	1606	1466	1292	3078	3084	2179	3218	2955	2316	2735	2018	1838	2671	1953	2552	2361	1875	2055	1684	1618	2190	2236
LOC105222286	0.1	0	0	0.12	0	9.85	12.49	8.78	31.62	31.32	23.99	28	22.43	31.32	51.17	21.83	3.92	31.76	15.19	39.86	53.17	33.58	32.33	29.83	37.47	1	0	0	1	0	75	128	60	244	276	176	248	149	182	342	152	35	273	102	302	393	229	297	271
LOC105222287	0.26	0.61	0.32	0.44	0.53	358.89	470.51	297.93	844.89	1039.79	500.46	441.28	313.17	703.44	1023.47	553.15	116.74	640.28	405.89	777.79	1089.6	805.09	685.49	752.69	730.57	4	8	5	6	7	4373	7718	3256	10432	14660	5875	6253	3329	6541	10944	6163	1668	8807	4361	9429	12885	8785	10077	10942
LOC105222288	0	0	0	0	0	10.05	9.86	7.75	19.35	24.02	11.08	10.67	4.98	22.28	29.41	15.06	2.96	14.07	10.55	18.58	27.49	18.98	16.25	25.48	23.02	0	0	0	0	0	81	107	56	158	224	86	100	35	137	208	111	28	128	75	149	215	137	158	245
LOC105222289	0	0	0	0	0.04	0	0.02	0	0	0.02	0	0.02	0	0	0	0	0	0.04	0	0.02	0.1	0	0	0.02	0	0	0	0	0	2	0	1	0	0	1	0	1	0	0	0	0	0	2	0	1	4	0	0	1
LOC105222290	5	4.88	5.74	5.77	5.88	5.2	5.48	6.06	4.97	4.45	5.92	6.23	5.1	4.19	4.34	6.27	6.68	5.64	6.47	5.87	7.5	6.07	6.94	7.15	7.47	238	196	273	240	239	195	277	204	189	193	214	272	167	120	143	215	294	239	214	219	273	204	314	320
LOC105222291	0.03	0	0	0.03	0	0.03	0	0	0.03	0.11	0.07	0.03	0.11	0.09	0.08	0.04	0.14	0.03	0.08	0.07	0.1	0.11	0.14	0.11	0.13	1	0	0	1	0	1	0	0	1	4	2	1	3	2	2	1	5	1	2	2	3	3	5	4
LOC105222292	0	0.01	0	0	0	0	0	0	0	0	0.02	0	0.07	0.04	0	0.05	0	0.03	0.03	0.01	0.02	0	0	0	0.01	0	1	0	0	0	0	0	0	0	0	1	0	4	2	0	3	0	2	2	1	1	0	0	0
LOC105222293	1.21	0.97	0.9	1.14	0.9	1.37	2.97	1.43	1.43	1.41	1.14	0.95	0.89	0.48	0.93	1.45	1.71	2.06	2.04	2.4	6.14	5.38	4.74	4.17	5.99	75	51	56	62	48	67	196	63	71	80	54	54	38	18	40	65	98	114	88	117	292	236	280	244
LOC105222294	139.32	150.45	146.02	132.21	149.87	61.43	78.8	62.87	67.55	63.69	76.49	88.4	67.1	72.63	80.46	76.82	80.49	78.99	82.82	87.1	92.63	87.14	94.41	95.78	102.65	5330	4864	5589	4421	4900	1853	3200	1701	2065	2223	2223	3101	1766	1672	2130	2119	2847	2690	2203	2614	2712	2354	3436	3447
LOC105222295	1.04	0.91	0.56	0.63	0.77	0.44	0.83	0.32	0.38	0.57	0.46	0.48	0.42	0.24	0.69	0.65	1.03	0.88	0.62	1.24	1.21	1.39	1.16	1.24	1.72	87	64	47	46	55	29	73	19	25	43	29	37	24	12	40	39	79	65	36	81	77	82	92	97
LOC105222296	108.49	111.02	108.95	107.91	113	84.6	97.48	90.14	86.25	89.56	67.54	62.75	56.97	65.21	60.14	62.84	68.07	64.09	61.18	64.74	63.59	63.09	70.02	62.68	68.29	6848	5922	6881	5954	6096	4211	6532	4024	4350	5158	3239	3632	2474	2477	2627	2860	3973	3601	2685	3206	3072	2812	4205	3722
LOC105222298	0.63	0.51	0.33	0.48	0.59	0.65	0.34	0.65	0.79	0.59	1.04	0.85	0.77	1.29	1.1	0.32	0.61	0.63	1.43	0.65	0.88	0.85	0.43	0.66	0.23	23.65	16.19	12.59	15.79	19.11	19.31	13.57	17.21	23.79	20.4	29.64	29.38	19.81	29.18	28.48	8.61	21.22	21	37.49	19.09	25.43	22.72	15.3	23.42
LOC105222299	2.78	2.74	2.62	2.27	2.26	1.81	2.56	1.89	1.99	2.28	2.77	2.62	2.27	2.27	2.5	3.21	3.06	3.05	2.83	3.71	4.33	4.5	4.04	4.35	4.73	613.35	510.81	576.41	437.21	424.89	314.69	598.43	294.79	350.21	457.6	463.36	529.62	343.19	300.82	380.52	510.39	622.78	598	433.51	640.91	730.57	700.28	846.7	901.58
LOC105222300	37.72	43.78	45.02	35.89	38.25	32.54	32.48	37.66	42.51	42.9	30.77	31.59	30.68	37.2	33.99	28.12	26.59	26.69	27.85	31.13	30	30.82	22.47	26.77	27.06	1011	1012	1221	852	907	695	946	716	931	1070	635	796	575	623	658	555	671	648	523	680	636	581	561	675
LOC105222301	0	0	0	0	0	0	0	0	0	0	0	0	0	0	0	0	0	0	0	0	0	0	0.08	0	0.37	0	0	0	0	0	0	0	0	0	0	0	0	0	0	0	0	0	0	0	0	0	0	1	0
LOC105222302	42.73	47.45	53.63	42.39	53.84	41.99	44.43	42.17	45.86	46.2	51.26	54.84	50.4	50.25	53.55	50.37	45.59	48.28	49.4	53.62	49.82	49.68	54.5	53.1	52.08	520	488	653	451	560	403	574	363	446	513	474	612	422	368	451	442	513	523	418	512	464	427	631	608
LOC105222303	13.3	15.24	14.43	15.45	14.79	14.37	17.08	13.36	13.66	14.7	15.34	15.75	13.87	13.6	14.56	22.52	22.52	19.81	21.7	20.27	22.22	22.13	21.72	22.7	25.16	855	828	926	870	807	729	1166	605	702	862	746	927	612	521	647	1039	1338	1130	972	1019	1092	1006	1324	1372
LOC105222304	0.16	0.33	0.16	0.23	0.4	0.1	0.22	0.11	0.28	0.2	0.16	0.37	0.21	0.17	0.35	0.31	0.37	0.25	0.2	0.49	0.61	0.46	0.47	0.51	0.36	8	14	8	10	17	4	12	4	11	9	6	17	7	5	12	11	17	11	7	19	23	16	22	24
LOC105222305	20.11	17.22	17.58	14.35	17.75	11.83	19.02	11.58	12.55	14.86	20.31	21.07	15.55	18	21.2	30.6	28.2	29.77	28.25	37.27	42.58	44.08	39.84	43.27	44.67	1173	849	1026	732	885	544	1178	478	585	791	900	1127	624	632	856	1287	1521	1546	1146	1706	1901	1816	2211	2375
LOC105222306	0.26	0.34	0.29	0.42	0.04	0.21	0.23	0.21	0.25	0.24	0.37	0.59	0.19	0.22	0.28	0.37	0.47	0.54	0.56	0.42	0.48	0.68	0.28	0.34	0.44	13	15	16	18	2	9	13	7	10	11	14	29	7	6	9	13	22	25	21	16	20	23	13	17
LOC105222307	3.87	2.73	2.93	3	3.07	0.87	2	1.23	2.19	1.64	2.46	2.11	1.63	1.87	2.52	3.11	2.97	3.29	3.14	3.1	1.63	2.21	2.23	1.66	2.37	62	37	47	42	42	11	34	14	28	24	30	31	18	18	28	36	44	47	35	39	20	25	34	25
LOC105222308	51.1	51.05	50.32	50.6	46.79	23.54	33.32	29.48	28.83	26.64	46.94	45.64	38.86	41.01	37.9	55.12	52.95	52.98	55.58	54.7	54.1	58.49	52	48.16	55.73	2165	1825	2134	1875	1693	784	1500	881	977	1028	1496	1750	1135	1035	1103	1669	2052	1978	1619	1809	1744	1747	2081	1889
LOC105222309	11.45	12.31	11.7	12.44	11.69	9.24	9.7	6.99	10.61	9.24	13.22	10.72	9.53	11.76	13.38	15.3	12.77	14.09	12.5	12.47	12.85	14.37	12.03	14.93	14.09	220	200	225	209	192	140	198	95	163	162	193	189	126	136	178	212	227	241	167	188	189	195	220	270
LOC105222310	10.23	10.26	10.65	10.62	11.27	14.89	12.55	12.07	12.01	13.47	8.51	9.06	7.78	10.11	9.15	8.76	9.13	8.77	8.39	9.97	8.18	8.36	8.25	7.95	6.98	1090	919	1142	987	1019	1220	1389	886	1014	1284	680	867	561	640	666	663	907	815	621	838	652	613	810	778
LOC105222311	35.08	31.43	32.06	31.1	30.2	48.45	38.8	45.22	50	42.81	42.05	38.5	32.03	37.68	53.97	43.12	34.26	35.64	29.86	37.5	30.28	34.51	33.97	33.68	33.17	296	224	270	229	217	322	346	269	336	328	269	298	185	191	314	262	266	267	175	248	196	206	272	267
LOC105222312	2.05	1.33	0.66	1.81	1.47	0.5	1.62	0.93	0.58	0.72	1.74	1.22	0.48	0.77	1.24	1.56	0.64	2.3	1.04	2.86	3.79	2.52	1.53	2.03	3.76	31	17	10	24	19	6	26	10	7	10	20	17	5	7	13	17	9	31	11	34	44	27	22	29
LOC105222313	6.62	9.03	10.19	9.59	7.69	5.3	4.64	4.27	3.75	3.63	7	5.77	5.37	6.26	6.35	8.51	8.31	7.84	7.75	9.86	7.51	7.39	8.28	7.91	7.58	274	316	422	347	272	173	204	125	124	137	220	219	153	156	182	254	318	289	223	320	238	216	326	308
LOC105222314	17.91	19.39	19.39	16.86	20.14	19.64	21.71	21.9	18.14	18.37	17.01	19.01	20.12	17.41	18.09	18.82	18.53	17.9	17.9	20.31	17.63	19.18	18.64	19.06	20.23	718	657	778	591	690	621	924	621	581	672	518	699	555	420	502	544	687	639	499	639	541	543	711	719
LOC105222315	24.32	22.3	23.57	21.39	22.76	19.9	20.19	19.63	17.71	18.03	21.62	20.6	21.74	18.84	21.05	24.81	24.08	26.27	23.76	29.25	29.32	28.93	28.36	27.74	29.03	995	771	965	765	796	642	877	568	579	673	672	773	612	464	596	732	911	957	676	939	918	836	1104	1068
LOC105222316	6.62	7.88	8.55	7.56	7.05	17.22	16.79	16.46	16.44	15.88	16.11	15.5	17.46	16.65	14.15	16.46	17.31	16.34	14.89	15.6	14.89	15.51	17.4	15.18	16.91	376	378	486	375	342	771	1012	661	746	823	695	807	682	569	556	674	909	826	588	695	647	622	940	811
LOC105222317	0.91	0.79	0.91	0.88	0.49	1.47	1.06	0.94	2.02	2	0.6	0.96	0.92	0.82	1.12	0.88	0.72	0.71	0.91	1.88	1.65	1.04	1.29	1.72	1.64	26	19	26	22	12	33	32	19	46	52	13	25	18	14	22	18	19	18	18	42	36	21	35	46
LOC105222318	0	0	0	0	0	0	0.15	0	0	0.17	0	0.17	0	0	0	0	0.17	0	0	0.2	0	0.22	0.98	0	0.2	0	0	0	0	0	0	1	0	0	1	0	1	0	0	0	0	1	0	0	1	0	1	6	0
LOC105222319	64.66	69.8	55.08	54.14	52.64	212.29	224.35	204.26	228.73	222.82	249.59	242.24	231.25	237.98	246.53	307.92	262.79	298.07	285.72	312.04	278.91	288.88	325.04	301.86	271.89	3189	2909	2718	2334	2219	8256	11746	7125	9014	10027	9352	10956	7846	7063	8414	10950	11984	13086	9798	12074	10527	10061	15251	14006
LOC105222320	0.18	0.59	0.66	0.67	0.4	0.1	0.62	0.41	0.66	0.38	0.49	0.32	0.35	0.22	0.08	0.55	0.2	0.3	0.68	1.01	0.66	0.64	0.5	0.76	0.64	7	19	25	22	13	3	25	11	20	13	14	11	9	5	2	15	7	10	18	30	19	17	18	27
LOC105222321	17.04	19.91	20.07	15.35	21.4	34.93	32.41	34.35	35.18	34.34	30.74	33.9	33.66	32.49	38.31	29.26	33.6	34.42	29.45	32.62	32.5	28.12	34.9	34.84	32.49	646	655	764	510	692	1025	1296	930	1039	1178	860	1163	864	735	986	789	1151	1153	769	962	926	738	1226	1222
LOC105222322	15.26	14.18	13.99	13.39	15.37	3.9	7.09	3.91	5.55	4.37	8.69	10.16	7.43	7.06	8.57	14.22	13.16	13.36	12.45	13.87	15.04	15.6	16.09	16.33	16.38	1042	818	956	799	897	210	514	189	303	272	451	636	349	290	405	700	831	812	591	743	786	752	1045	1049
LOC105222323	10.11	10.8	12.13	11.85	12.12	12.57	12.55	13.81	13.46	15.19	13.44	13.66	12.05	14.67	14.9	13.48	12.59	15.46	12.77	15.28	14.37	11.81	12.44	13.58	13.61	205	185	246	210	210	201	270	198	218	281	207	254	168	179	209	197	236	279	180	243	223	169	240	259
LOC105222324	24.45	21.17	26.14	21.07	23.41	16.82	15.21	14.52	13.66	10.38	9.93	8.89	7.99	8.88	8.43	7.88	7.79	10.26	8.18	7.68	6.39	9.12	8.53	6.73	7.05	645	472	690	486	528	350	426	271	288	250	199	215	145	141	154	150	190	241	150	159	129	170	214	167
LOC105222325	80.5	84.34	87.76	89.01	85.66	77.49	94.27	73.93	75.53	73.19	78.53	84.09	78.66	79.18	74.46	81.75	90.8	83.81	78.71	88.52	68.38	74.06	77.92	83.33	78.73	7432	6590	8113	7182	6754	5648	9228	4826	5571	6170	5503	7120	5005	4401	4754	5437	7750	6889	5049	6415	4831	4830	6835	7238
LOC105222326	22.85	20.48	17.93	23.08	21.3	8.72	8.24	8.43	8.91	8.28	8.27	7.85	7.85	6.26	6.6	8.32	7.42	8.38	8.54	8.56	7.61	7.82	7.4	7.71	7.84	1146	868	900	1012	913	345	439	299	357	379	315	361	271	189	229	301	344	374	298	337	292	277	353	364
LOC105222327	2.01	2.15	1.01	2.61	2.76	1.62	4.88	1.2	2.62	6.49	4.07	3.08	0.79	4.69	2.63	3.17	2.01	2.91	2.56	2.71	5.46	1.04	2.07	1.65	2.55	52	47	26	59	61	33	134	22	54	153	80	73	14	73	47	59	48	67	46	55	108	19	51	40
LOC105222328	76.36	78.39	74.53	76.26	74.83	80.19	95.13	88.61	97.04	92.48	87.2	95.08	91.03	86.83	90.27	79.91	92.09	78.73	84.26	82.1	82.09	80.94	83.22	83.99	86.85	1495	1297	1460	1305	1252	1238	1977	1227	1518	1652	1297	1707	1226	1023	1223	1128	1667	1372	1147	1261	1230	1119	1550	1547
LOC105222329	5.52	6.91	5.91	5.71	5.71	7.95	8.19	6.95	8.07	7.77	7.88	7.23	8.54	8.41	7.1	7.9	7.55	8.32	7.63	6.9	7.59	7.06	8.16	8.18	8.43	155	164	166	140	137	176	244	138	181	199	168	186	165	142	138	160	196	208	149	152	163	140	218	216
LOC105222330	38.21	38.23	40.23	36.9	37.74	37.25	44.47	41.56	38.16	39.64	39	34.79	38.81	39.14	34.78	34.32	39.87	37.33	38.34	39.13	35	37.14	36.1	35.82	38.07	2414	2052	2583	2075	2064	1867	3032	1858	1956	2304	1898	2017	1687	1509	1520	1588	2326	2119	1692	1953	1718	1663	2145	2125
LOC105222332	11.8	13.16	13.25	11.32	15.33	11.61	11.58	11.77	13.64	12.04	13.23	14.5	16.2	15.13	15.43	14.73	14.26	17.11	17.43	14.59	17.01	16.21	13.07	16.03	15.36	285	274	324	242	325	225	300	208	268	270	249	329	270	230	261	258	327	371	295	278	323	278	301	365
LOC105222333	5.91	5.96	5.95	5.27	4.42	2.09	3.6	1.9	3.48	3.09	3.03	3.93	2.65	3.68	3.83	3.43	2.77	4.98	4.31	3.43	4.26	4.3	3.93	3.42	4.18	136	116	137	106	87	38	88	31	64	65	53	83	42	51	61	57	59	102	69	62	75	70	86	74
LOC105222334	7.76	7.96	7.72	8.22	8.12	7.76	10.05	8	9.35	8.15	7.63	6.98	8.74	7.86	8.38	5.18	6.31	8.07	6.45	6.94	6.23	7.41	6.62	6.16	6.53	218	189	217	202	195	172	300	159	210	209	163	180	169	133	163	105	164	202	126	153	134	147	177	163
LOC105222335	1870.39	1784.73	1827.67	1919.9	1860.93	1473.19	1389.61	1331.46	1589.75	1513.53	1603.64	1571.86	1487.55	1563	1616.14	1563.92	1532.63	1511.99	1464.11	1403.24	1486.45	1419.75	1589.46	1550.61	1398.22	24484	19574	23722	21742	20631	15085	19081	12170	16404	17886	15713	18683	13150	12150	14464	14562	18240	17339	13103	14202	14714	12953	19544	18814
LOC105222336	13.5	15.13	15.54	14.06	12.37	12.54	13.25	12.63	13.78	14.31	10.75	12.39	12.35	11.35	14.05	12.01	12.35	11.57	12.69	11.21	14.1	13.77	12.66	15.36	13.31	494	468	569	450	387	362	515	327	403	478	299	416	311	250	356	317	418	377	323	322	395	356	441	529
LOC105222337	2.72	2.56	2.48	2	1.61	1.04	1.24	1.49	1.28	0.58	2.81	1.78	1.53	1.02	1.9	2.84	3	2.26	2.81	3.16	3.13	3.27	3.68	3.17	3.4	93	74	85	60	47	28	45	36	35	18	73	56	36	21	45	70	95	69	67	85	82	79	120	102
LOC105222338	4.08	3.33	2.69	3.82	2.72	3.15	4.61	4.61	5.51	7.06	3.27	5.11	2.49	4.2	4.89	3.84	4.59	4.31	3.17	4.16	3.73	5.37	4.11	3.16	4.23	100	69	66	82	57	61	120	80	108	158	61	115	42	62	83	68	104	94	54	80	70	93	96	73
LOC105222339	27.81	26.77	24.09	27.61	28.33	35.56	34.71	36.97	37.98	35.85	29.98	31.28	36.83	36.68	33.42	29.3	27.75	28.62	31.42	28.4	31.14	31.56	36.36	36.36	31.95	504	410	437	437	439	508	668	474	550	593	413	520	459	400	419	383	465	462	396	404	432	404	627	620
LOC105222341	13.7	12.88	14.24	13.41	13.09	12.69	11.76	10.92	10.62	10.42	12.41	14.11	10.5	12.51	11.98	14.6	13.29	14.3	14.81	15.73	14.11	13.97	13.79	14.17	15.08	846	672	880	724	691	618	771	477	524	587	582	799	446	465	512	650	759	786	636	762	667	609	810	823
LOC105222342	4.78	4.75	5.31	3.72	5.87	2.11	1.9	2.62	2.02	1.27	0.7	0.99	1.28	0.39	1.08	0.49	1.54	1.45	1.32	1.54	1.3	0.91	0.95	1.12	1.09	81.37	68.29	90.38	55.37	85.43	28.34	34.43	31.52	27.49	19.71	9	15.48	15	4	12.74	6	24.32	22	15.63	20.52	17	11	15.43	18
LOC105222343	4.79	4.69	5.07	4.79	4.39	1.49	2	1.11	1.64	1.83	2.49	2.19	1.55	2.06	1.88	3.05	2.86	2.42	2.82	3.05	3.67	3	3.26	4.22	3	217	181	232	190	171	54	97	36	60	76	87	92	49	57	59	101	121	99	90	110	127	97	140	181
LOC105222344	5.75	3.69	5.01	5.11	3.42	1.83	2.72	3	2.37	3.17	2.49	1.96	2.24	2.19	1.62	3.56	1.95	3.32	3.05	3.07	3.69	3.87	4.05	3.04	3.74	179	97	156	139	91	45	90	66	59	90	59	56	48	41	35	80	56	92	66	75	88	85	120	89
LOC105222345	24.67	24.49	24	24.61	25.54	37.33	38.15	34.83	42.73	46.83	37.87	35.24	36.86	42.14	37.68	38.23	31.82	38.24	36.56	45.12	46.38	44.3	40.7	42.31	43.21	2093	1756	2037	1825	1852	2497	3436	2090	2897	3625	2441	2742	2151	2152	2212	2339	2496	2888	2157	3003	3012	2654	3286	3377
LOC105222346	29.84	32.08	32.47	32.19	26.58	20.57	24.09	27.47	22.09	20.5	25.57	28.98	25.54	26.46	26.9	29.43	33.18	32.76	31.62	31.97	30.99	30.71	31.17	37.21	32.41	1398	1270	1522	1318	1064	760	1198	910	827	876	910	1245	823	746	872	994	1437	1366	1030	1175	1111	1016	1389	1640
LOC105222347	9.45	9.48	7.02	9.56	6.44	9.5	6.03	7.49	11.4	10.84	8.82	8.47	7.32	10.87	14.34	10.47	5.56	10.93	7.5	14.32	13.22	17.02	9.5	11.89	15.24	319	263	239	283	190	236	206	176	307	321	206	265	167	226	307	261	167	339	182	364	356	392	282	371
LOC105222348	1.43	1.56	1.32	1.04	1.41	0.94	1.36	1.37	1.14	1.46	1.08	1.08	1.43	1.44	1.67	1.12	1.27	1.67	1.21	1.72	1.92	1.54	1.23	2.38	1.55	124	114	114	79	104	64	125	84	79	115	71	87	85	75	100	71	102	129	74	118	127	94	101	195
LOC105222349	24.47	25.71	22.38	23.34	22.64	12.03	13.53	12.2	13.14	13.6	13.58	14.57	13.69	15.62	15.46	15.05	14.73	16.33	17.48	18.08	18.12	18.22	17.54	17.05	17.08	1246	1121	1161	1053	995	493	749	446	542	638	536	691	487	484	545	559	709	750	623	736	721	667	864	833
LOC105222350	0	0.08	0.05	0	0	0	0.04	0	0.06	0.05	0.06	0.03	0.03	0.08	0.14	0	0.03	0.03	0.03	0	0	0	0.02	0.02	0	0	3	2	0	0	0	2	0	2	2	2	1	1	2	4	0	1	1	1	0	0	0	1	1
LOC105222351	0	0	0	0	0	0	0	0	0	0	0	0	0	0	0	0	0	0	0	0	0	0	0	0	0	0	0	0	0	0	0	0	0	0	0	0	0	0	0	0	0	0	0	0	0	0	0	0	0
LOC105222353	0.02	0.01	0	0	0	0.01	0.06	0.06	0.04	0.04	0.01	0.01	0.01	0	0.01	0	0	0.02	0.01	0	0.01	0.02	0.01	0	0.02	4	1	0	0	0	2	11	8	6	6	2	1	1	0	1	0	0	3	1	0	1	3	2	0
LOC105222354	16.55	20.27	18.03	19.65	17.2	22.36	21.92	22.52	22.83	21.88	14.29	15.65	14.06	15.59	14.82	11.07	13.53	12.11	12.29	11.83	10	11.31	11.72	12.96	12.56	852	882	929	884	757	908	1198	820	939	1028	559	739	498	483	528	411	644	555	440	478	394	411	574	628
LOC105222355	4.91	3.69	3.76	4.27	3.71	3.83	4.62	3.89	5.16	5.42	6.57	7.1	4.26	6.47	7.67	10.27	7.04	9.72	7.88	12.97	11.6	12.35	8.65	10.16	12.21	799	508	612	608	516	492	798	448	672	805	813	1061	477	634	864	1206	1060	1409	892	1657	1446	1421	1341	1557
LOC105222356	6.48	7.34	7.03	7.2	6.14	0.72	0.66	0.46	0.83	1.06	0.82	0.95	0.3	1.1	0.47	0.82	0.27	0.75	0.52	1.33	1.49	1.13	0.64	0.91	0.82	342	327	371	332	277	30	37	17	35	51	33	46	11	35	17	31	13	35	19	55	60	42	32	45
LOC105222357	17.27	17.84	20.11	21.12	20.98	34.87	27.87	31.61	36.67	33.21	26.67	22.93	24.27	21.58	23.65	18.01	19.6	19.51	21.35	18.92	16.85	21.15	20.7	19.42	19.02	363	317	423	388	377	578	622	470	616	637	426	442	351	273	344	273	381	365	312	312	271	314	414	384
LOC105222358	76.13	80.84	82.34	75.44	78.96	24.89	47.14	31.12	28.08	29.8	53.87	60.97	39.3	36.67	55.53	84.58	81.95	76.88	85.42	95.57	102.09	102.08	86.2	101.91	106.11	1219.16	1094.01	1319.44	1056.04	1080.73	314.3	801.42	352.51	359.27	435.46	655.38	895.33	432.98	353.42	615.45	976.63	1213.44	1095.97	951.13	1200.71	1251.25	1154.44	1313.29	1535.39
LOC105222359	0	0	0	0	0	0	0	0	0	0	0	0	0	0	0	0	0	0	0	0	0.12	0	0	0.1	0	0	0	0	0	0	0	0	0	0	0	0	0	0	0	0	0	0	0	0	0	1	0	0	1
LOC105222360	0	0	0	0	0.04	0	0	0	0	0.03	0	0.03	0	0.05	0	0	0.03	0	0.13	0.12	0.04	0.39	0.1	0	0	0	0	0	0	1	0	0	0	0	1	0	1	0	1	0	0	1	0	3	3	1	9	3	0
LOC105222361	0.29	0.34	0.19	0.65	1.22	151.31	203.04	107.53	465.7	420.78	482.41	513.02	327.08	789.81	1069.39	579.33	111.63	660.33	357.84	731.71	1056.68	840.25	529.3	689.46	664.92	3	3	2	6	11	1256	2270	801	3917	4042	3858	4953	2370	5005	7790	4397	1087	6191	2618	6043	8516	6248	5299	6830
LOC105222362	0	0	0	0.46	0	0.3	0.22	0.11	0.1	0	0.1	0	0	0.93	0	0	0	0.09	0.11	0.2	0.1	0.11	0	0	0	0	0	0	5	0	3	3	1	1	0	1	0	0	7	0	0	0	1	1	2	1	1	0	0
LOC105222363	21.15	22.12	19.17	20.5	19.49	24.09	27.41	27.49	26.04	24.77	25.76	29.01	23.7	23.66	24.56	24.6	25.72	24.57	27.92	25.71	25.38	27.72	28.21	27.97	29.11	917	814	841	781	726	835	1265	845	895	973	843	1147	721	611	744	772	1033	943	853	873	838	842	1142	1125
LOC105222364	24.17	20.8	22.13	23.61	20.38	16.7	19.22	17.89	17.85	19.33	18.71	17.99	17.22	20.78	17.47	21.98	20.41	21.59	21.52	21.56	24.62	26.51	27.74	24.08	25.35	868.56	631.48	795.39	741.47	625.77	473.08	732.94	454.68	512.44	633.58	510.77	592.88	425.66	449.39	434.44	569.51	678.04	690.42	537.67	607.61	677.01	672.71	948.17	813.84
LOC105222366	56.73	58.42	59.37	56.68	52.32	21.98	33	21.04	22.7	19.67	37.95	43.8	23.53	25.94	40.1	66.27	56.17	52.33	56.89	66.74	78.58	70.62	45.06	57.6	68.92	630.84	548.99	660.56	550.96	497.27	192.7	389.58	165.49	201.73	199.54	320.62	446.67	180.02	173.58	308.55	531.37	577.56	518.03	439.87	582.29	668.75	554.56	476.71	602.61
LOC105222367	24.29	25.15	21.56	21.57	24.58	8.04	15.66	8.98	9.21	10.13	16.89	19.82	14.5	14.77	19.14	34.34	33.31	34.59	38.21	31.51	49.79	53.43	46.19	52.03	57	849	743	752	659	728	219	581	222	256	319	439	627	346	309	457	861	1062	1067	925	858	1308	1309	1502	1691
LOC105222368	16.13	16.76	18.71	18.32	13.47	25.46	23.09	21.68	27.43	25.31	26.99	22.09	20.95	26.3	25.45	25.19	22.38	22.55	19.39	21.51	24.78	25.99	26.21	25.85	24.38	262	230	304	260	187	326	398	249	356	375	333	329	234	257	286	295	336	326	219	274	308	298	405	395
LOC105222369	7.62	6.01	5.01	6.28	6.34	10.71	10.15	9.22	14.17	14.59	7.05	7.78	7.38	10.61	9.92	7.33	8.09	7.17	6.51	6.12	7.44	10.11	6.35	7.08	8.07	111	74	73	80	79	123	157	95	165	194	78	104	74	93	100	77	109	93	66	70	83	104	88	97
LOC105222370	12.66	11.78	11.88	11.18	12.77	8.93	11.31	9.17	9.03	9.02	8.46	8.55	7.48	7.84	7.76	10.11	10.7	11.38	12.39	11.88	11.38	10.96	13.79	12.23	12.97	1219	960	1160	955	1035	674	1150	624	698	790	619	743	492	455	539	712	944	996	836	886	845	746	1234	1084
LOC105222371	2.79	2.46	2.2	2.81	2.86	2.42	2.53	2.22	2.45	2.61	2.19	2.32	3.23	2.65	2.68	2.36	2.77	2.64	2.44	2.55	2.09	1.8	2.25	2.17	2.17	421	313	331	370	368	288	404	237	295	357	251	320	335	240	280	255	386	354	255	301	241	192	323	307
LOC105222372	13.2	13.53	13.29	12.11	11.81	5.39	5.64	4.1	5.39	5.94	6.39	5.13	4.57	5.07	5.7	6.86	5.7	7.12	5.59	6.59	7.58	7.95	8.35	7.4	7.34	696	603	701	557	531	224	316	153	227	286	256	248	165	161	208	261	278	334	205	271	306	296	419	367
LOC105222373	167.63	168.93	164.19	158.59	146.51	143.64	116.72	139.67	110.14	137.81	112.84	107.69	110.25	109.37	107.16	81.72	96.61	95.66	89.15	85.62	84.37	84.66	100.49	93.2	90.27	4157	3543	4072	3444	3107	2817	3081	2457	2190	3125	2144	2464	1895	1647	1850	1474	2231	2138	1551	1682	1621	1501	2398	2199
LOC105222374	0.67	0.53	0.56	0.39	0.26	0.57	1.69	0.63	1.26	0.86	1.48	2.2	0.49	1.49	1.3	1.71	2.19	1.39	1.29	2.43	3.23	3.34	3.54	3.34	3.27	6	4	5	3	2	4	16	4	9	7	10	18	3	8	8	11	18	11	8	17	22	21	30	28
LOC105222375	0.37	0.56	0.12	0.29	0.05	0.74	0.31	0.13	1.29	0.38	1.14	0.91	0.41	1.01	1	1.04	0.38	1.11	1.05	0.57	1.18	0.56	0.62	0.52	1.09	17	23	5	12	2	28	17	4	51	16	45	37	13	28	36	35	18	50	36	23	41	18	28	21
LOC105222376	7.31	8.47	6.77	6.14	6.96	3.62	4.32	2.88	3.63	2.68	4.95	6.09	3.4	5.43	4.75	10.65	8.61	7.95	9.08	9.62	8.99	7.72	7.5	8.51	7.53	338	331	313	248	275	132	212	94	134	113	174	258	108	151	152	355	368	327	292	349	318	252	330	370
LOC105222377	11.82	12.73	13.16	11.79	12.29	3.71	3.3	2.79	2.82	3.58	2.28	2.6	2.08	2.27	2.59	2.4	2.38	2.24	2.22	2.74	2.23	2.41	2.53	3.04	2.06	943	858	1050	823	837	233	279	157	180	260	138	190	114	109	143	139	175	159	124	172	136	136	192	228
LOC105222379	1192.99	1152.09	1094.96	1227.77	1071.29	1043	945.34	952.88	1058.43	1057.23	866.94	886.16	873.47	866	868.21	735.56	721.95	768.44	692.13	687.12	695.35	694.29	831.09	771.06	769.61	28927	23607	26564	26022	22200	19942	24333	16341	20507	23390	15970	19704	14570	12636	14568	12860	16186	16586	11669	13071	12903	11888	19171	17589
LOC105222380	24.27	23.47	22.54	25.1	20.24	43.4	46.26	46.85	49.93	44.48	50.3	61.24	49.21	56.15	57.22	58.09	48.9	62.87	57.07	56.88	68.54	74.51	58.95	63.83	64.88	1237	1000	1128	1092	868	1727	2422	1638	1988	2029	1936	2812	1677	1668	1984	2113	2253	2779	1981	2258	2644	2654	2786	2977
LOC105222381	1.34	2.69	0.77	2.79	0.81	2.21	1.53	0.63	3.2	1.74	1.71	0.93	0.24	1.55	1.53	0.62	0.66	0.96	0.7	0.67	1.8	1.21	0.55	0.91	0.67	33	56	19	60	17	43	40	11	63	39	32	21	4	23	26	11	15	21	12	13	34	21	13	21
LOC105222382	72.99	67.44	67.18	75.9	68.02	86.89	99.46	81.46	116.21	119.06	98.81	104.94	85.11	118.39	108.53	109.02	73.33	105.52	92.7	127.71	130.37	134.99	107.5	117.09	117.73	2249	1756	2071	2044	1791	2111	3253	1775	2861	3347	2313	2965	1804	2195	2314	2422	2089	2894	1986	3087	3074	2937	3151	3394
LOC105222383	0.02	0.03	0	0	0.03	0	0	0.03	0	0.03	0	0.1	0.1	0.08	0.14	0.24	0.19	0.3	0.07	0.36	0.23	0.47	0.39	0.35	0.22	1	1	0	0	1	0	0	1	0	1	0	4	3	2	4	8	8	12	2	13	8	15	17	15
LOC105222384	19.74	17.7	18.4	21.9	19.23	24.67	24.46	22.51	26.88	26.59	19.33	19.76	18.98	20.66	21.11	18.76	16.82	17.77	17	18.38	15.81	16.55	16.04	16.98	15.08	2601	1968	2425	2525	2170	2571	3434	2108	2849	3211	1943	2396	1726	1643	1937	1790	2058	2091	1558	1912	1598	1539	2008	2107
LOC105222385	0.02	0	0	0.16	0	0.03	0	0	0	0	0.06	0.03	0	0	0	0	0.03	0	0	0	0	0	0.02	0	0	1	0	0	6	0	1	0	0	0	0	2	1	0	0	0	0	1	0	0	0	0	0	1	0
LOC105222386	0.49	0.51	0.51	0.62	0.7	0.38	0.38	0.23	0.37	0.27	0.14	0.2	0.06	0.23	0.23	0.28	0.42	0.35	0.23	0.26	0.19	0.18	0.21	0.38	0.31	75	68	79	84	92	46	63	25	45	39	16	28	6	21	24	32	60	49	25	31	22	20	31	56
LOC105222387	51.2	56.92	45.82	58.18	40.97	143.77	118.6	124.86	134.26	131.46	7.38	10.32	9.92	12.84	8	3.72	3.46	3.13	4.51	2.48	1.55	2.07	2.56	2.37	1.63	1471	1382	1317	1461	1006	3257	3617	2537	3082	3446	161	272	196	222	159	77	92	80	90	56	34	42	70	64
LOC105222388	0	0	0	0	0	0	0	0	0	0	0	0	0	0	0	0	0	0	0	0	0	0	0	0	0	0	0	0	0	0	0	0	0	0	0	0	0	0	0	0	0	0	0	0	0	0	0	0	0
LOC105222389	0.43	0	0.14	0.32	0.08	0	0.07	0	0	0	0	0	0	0	0	0	0	0	0.1	0	0	0	0.07	0	0	6	0	2	4	1	0	1	0	0	0	0	0	0	0	0	0	0	0	1	0	0	0	1	0
LOC105222390	0.64	0.19	0	0.55	0.09	0	0	0.11	0	0	0	0	0	0	0	0	0	0	0	0	0	0	0	0	0	8	2	0	6	1	0	0	1	0	0	0	0	0	0	0	0	0	0	0	0	0	0	0	0
LOC105222391	2.22	2.23	2.49	2.74	2.61	3.83	2.42	3.55	2.76	2.42	3.24	3.12	2.63	2.73	3.17	3.41	3.05	2.99	3.28	3.31	3.31	2.66	3.26	3.28	3.14	177	150	199	191	178	241	205	200	176	176	196	228	144	131	175	196	225	212	182	207	202	150	247	246
LOC105222392	14.82	15.26	16.31	15.24	15.48	13.99	18.37	15.77	17.9	14.77	13.6	14.33	14.13	13.25	11.79	13.69	14.44	12.12	11.82	11.76	11.98	10.95	12.01	14.16	13.69	485	422	534	436	433	361	638	365	468	441	338	430	318	261	267	323	437	353	269	302	300	253	374	436
LOC105222393	5.42	3.5	3.57	4.07	3.84	3.18	5.11	2.93	3.02	3.68	2.07	2.62	2.5	2.23	2.43	5.12	4.7	4.54	5	6.33	9.25	8.11	7.6	7.3	9.14	413	225	272	271	250	191	413	158	184	256	120	183	131	102	128	281	331	308	265	378	539	436	551	523
LOC105222395	0.21	0.18	0.23	0.17	0.34	0.41	0.46	0.37	0.22	0.4	0.41	0.3	0.18	0.23	0.52	0.49	0.24	0.25	0.41	0.41	0.2	0.41	0.24	0.31	0.46	17	12	18	12	23	26	39	21	14	29	25	22	10	11	29	28	18	18	23	26	12	23	18	23
LOC105222396	1757.32	1633.04	1679.21	1545.1	1817.68	876.63	1016.86	796.07	823.17	859.67	736.68	812.02	629.98	636.76	756.54	620.63	595.92	575.16	640.5	621.59	593.41	562.99	651.95	602.28	626.35	59156	46456	56559	45463	52292	23265	36331	18949	22138	26402	18838	25065	14587	12897	17621	15061	18545	17232	14990	16414	15286	13381	20877	19072
LOC105222397	8.78	7.7	6.26	8.23	8.82	5.37	5.78	4.45	6.9	6.28	5.21	5.74	5.84	4.76	5.54	4.88	4.45	4.65	6.09	4.09	5.05	5.34	5.6	4.83	5.99	282	209	201	231	242	136	197	101	177	184	127	169	129	92	123	113	132	133	136	103	124	121	171	146
LOC105222398	0	0	0.11	0	0	0	0	0	0	0.24	0	0	0	0	0	0	0	0	0	0	0	0	0	0	0	0	0	1	0	0	0	0	0	0	2	0	0	0	0	0	0	0	0	0	0	0	0	0	0
LOC105222399	75.87	79.56	78.44	78.2	78.19	85.03	83.3	77.82	84.53	80.98	80.74	86.07	81.7	91.23	84.8	80.32	91.74	87	80.96	86.73	80.03	86.99	91.86	88.68	92.23	1686	1494	1744	1519	1485	1490	1965	1223	1501	1642	1363	1754	1249	1220	1304	1287	1885	1721	1251	1512	1361	1365	1942	1854
LOC105222400	36.43	37.52	32.72	37.86	33.99	41.23	39.42	38.84	42.37	43.1	39	38.63	36.1	40.91	41.35	46.85	42.18	40.81	43.72	45.05	47.95	44.43	48.91	48.91	49.64	2129	1851	1910	1932	1695	1891	2437	1601	1968	2281	1720	2062	1445	1429	1659	1966	2274	2115	1770	2054	2131	1819	2711	2672
LOC105222401	0	0	0	0.07	0	0.04	0	0	0	0.07	0	0	0	0	0	0	0	0	0.05	0	0.04	0	0	0	0	0	0	0	2	0	1	0	0	0	2	0	0	0	0	0	0	0	0	1	0	1	0	0	0
LOC105222402	11.58	11.6	10.54	10.93	12.25	10.07	9.86	10.76	11.03	9.97	10.51	10.42	10.16	12.03	12.55	12.11	11.54	10.88	11.66	13.13	13.3	13.36	13.74	12.36	12.25	280	237	255	231	253	192	253	184	213	220	193	231	169	175	210	211	258	234	196	249	246	228	316	281
LOC105222404	1.49	2.4	2.26	2.79	3.71	1.74	1.18	1.58	1.05	1.16	0.98	0.35	1.08	0.92	0.32	0.83	1.26	0.54	0.74	0.64	0.76	0.71	0.93	0.9	0.7	28.02	38.17	42.44	45.91	59.67	25.88	23.59	21	15.82	19.84	14.04	6	14.03	10.45	4.18	11.25	22	9	9.62	9.39	11	9.39	16.66	16
LOC105222405	19.39	16.92	16.24	19.83	16.67	84.35	91.21	93.56	88.03	85.88	104.36	98.16	120.78	107.27	100.53	95.29	104.57	97.04	89.14	91.65	73.53	85.45	103.34	86.12	85.49	1001	737	838	892	738	3425	4991	3409	3629	4030	4081	4637	4278	3329	3583	3553	4979	4458	3197	3700	2900	3117	5062	4172
LOC105222406	0	0.01	0	0	0	0	0	0	0	0	0.03	0	0	0	0	0.02	0	0	0.04	0	0.03	0	0	0.01	0	0	1	0	0	0	0	0	0	0	0	2	0	0	0	0	1	0	0	2	0	2	0	0	1
LOC105222407	0.09	0.26	0.48	0.38	0.26	0.62	0.4	0.38	0.53	0.66	0.75	0.62	0.31	0.2	0.91	0.5	0.32	0.39	0.47	0.4	0.51	0.53	0.57	0.48	0.17	3	6	16	8	7	16	14	9	14	20	19	19	7	4	21	11	10	10	11	10	11	11	17	15
LOC105222408	3.4	2.35	2.96	3.58	2.41	5.15	4.51	5.18	5.25	5.44	3.46	3.2	3.04	3.52	3.59	2.47	2.62	2.78	3.07	3.35	1.51	1.84	1.54	1.74	1.51	509	297	443	468	308	607	716	548	628	743	393	439	313	317	372	266	362	370	319	393	173	194	219	245
LOC105222409	2.45	2.97	3.01	2.21	3	2.23	2.07	2.32	2.46	2.58	2.64	3.11	2.75	3.08	2.48	2.65	2.13	2.67	2.47	2.39	3.08	2.38	2.98	2.28	2.86	127	130	156	100	133	91	114	85	102	122	104	148	98	96	89	99	102	123	89	97	122	87	147	111
LOC105222410	2.03	1.32	1.14	1.61	1.08	0.84	1.5	1.15	0.72	0.63	0.72	0.6	0.53	0.57	0.54	0.77	0.96	0.83	1.29	1.23	1.65	1.85	1.35	1.52	1.71	274	150	153	189	124	89	215	110	77	78	74	74	49	46	50	75	120	100	121	130	170	176	173	193
LOC105222411	10.86	11.64	10.33	9.79	10.3	12.88	11.22	12.11	10.99	11.13	16.16	15.89	16.68	14.92	17.25	18.77	21.17	18.12	20.9	18.29	23.21	25.21	26.08	25.69	25.83	544	493	518	429	441	509	597	429	440	509	615	730	575	450	598	678	981	808	728	719	890	892	1243	1211
LOC105222412	0.26	0.18	0.52	0.16	0.17	0.49	0.04	0.17	0.15	0.19	0.1	0.13	0.03	0.04	0	0	0.15	0.21	0.31	0.1	0.28	0.11	0.12	0.18	0.12	12	8	27	6	7	17	2	5	5	8	4	6	1	1	0	0	7	8	9	4	9	4	6	7
LOC105222413	0.04	0	0	0	0	0	0.15	0.11	0	0	0	0	0	0	0	0	0.04	0	0	0	0.05	0	0	0	0.05	1	0	0	0	0	0	4	2	0	0	0	0	0	0	0	0	1	0	0	0	1	0	0	0
LOC105222414	6.57	6.04	6.56	4.97	5.03	11.02	7.88	7.48	9.4	8.39	9.33	8.45	9.54	6.28	9.21	9.5	8.53	9.5	8.97	10.29	9.87	11.5	10.58	11.3	11.11	139	108	139	92	91	184	177	112	159	162	150	164	139	80	135	145	167	179	132	171	160	172	213	225
LOC105222415	22.2	19.7	19.35	25.5	24.16	31.65	28.44	27.87	28.84	32.94	27.23	25.66	30.27	29.44	32.02	30.91	30.78	31.47	23.82	31.75	28.95	31.69	20.72	25.01	27.41	500	375	436	502	465	562	680	444	519	677	466	530	469	399	499	502	641	631	373	561	499	504	444	530
LOC105222416	0.78	0.65	0.6	0.62	0.34	2.39	3.7	1.71	1.85	2.33	4.38	5.41	4.44	6.47	4.64	10.1	11.52	7.44	10.72	7.79	10.76	9.07	10.78	11.07	12.19	40	28	31	28	15	97	202	62	76	109	171	255	157	200	165	374	547	340	383	314	423	329	527	535
LOC105222418	3.23	3.45	3.16	2.95	3.43	0.9	1.32	1.22	1.08	1.41	1.18	1.57	1.35	1.01	1.47	1.94	1.76	2.08	2.25	2.03	1.94	1.33	1.79	1.89	1.84	213	192	208	170	193	47	92	57	57	85	59	95	61	40	67	92	107	122	103	105	98	62	112	117
LOC105222419	0.08	0.18	0.31	0.09	0	0	0	0	0	0	0.1	0	0	0	0	0	0	0	0	0	0	0	0	0.08	0	1	2	4	1	0	0	0	0	0	0	1	0	0	0	0	0	0	0	0	0	0	0	0	1
LOC105222420	11.06	11.66	12.33	13.22	12.7	10.14	10.74	10.05	9.69	11.05	9.29	9.74	10.87	10.41	7.97	11.36	9.69	10.33	9.23	10.37	9.79	11.15	10.92	10.65	10.31	917	813	1020	955	905	666	949	598	645	832	577	740	620	515	465	688	740	764	535	669	613	652	861	840
LOC105222421	34.32	35.95	34.11	35.02	35.24	48.35	43.37	51.17	46.52	46.93	38.61	43.11	47.1	47	41.1	31.76	36.12	37.58	38.65	34.82	35.23	33.94	38.48	37.49	35.19	923	817	917	821	810	1021	1240	975	1001	1150	787	1063	869	761	764	618	898	903	726	737	726	645	981	948
LOC105222422	0	0.05	0.17	0.09	0.15	0	0	0.12	0.05	0.05	0	0.23	0.12	0	0.05	0	0.13	0.19	0.06	0	0.05	0	0.04	0	0	0	1	4	2	3	0	0	2	1	1	0	5	2	0	1	0	3	4	1	0	1	0	1	0
LOC105222423	0	0	0	0.17	0	0	0.03	0	0	0.03	0.12	0.07	0.04	0	0.09	0	0	0	0.04	0	0	0	0	0	0	0	0	0	5	0	0	1	0	0	1	3	2	1	0	2	0	0	0	1	0	0	0	0	0
LOC105222424	3.39	3.48	3	3.8	4.21	3.17	3.7	2.37	3.05	2.97	3.07	2.75	2.37	2.92	2.19	4.19	3.33	3.21	3.91	3.24	3.44	3.5	3.03	4.25	3.36	219	190	196	209	227	158	253	105	159	170	148	158	105	110	91	191	192	180	171	163	166	154	187	253
LOC105222425	11.16	10.85	11.15	12.31	11.01	18.3	18.62	22.54	19.15	20.01	20.88	17.65	21.2	17.22	19.12	14.81	19.31	15.76	16.97	14.94	14.69	12.19	14.41	14.4	14.72	140	115	140	135	118	181	248	200	192	229	199	203	183	130	166	134	224	176	148	147	141	108	172	170
LOC105222426	5.39	5.64	4.96	5.29	5.35	8.06	8.18	7.39	8.11	9.41	7.74	7.14	7.58	7.67	7.2	7.45	6.84	8.35	7.91	7.28	7.93	8.23	8.12	7.71	8.21	396	350	365	340	336	467	638	384	476	631	432	481	383	339	366	395	465	546	404	420	446	427	568	533
LOC105222427	21.15	18.94	20.27	21.63	20.46	41.7	40.27	38.36	41.02	37.78	40.18	42.67	42.94	41.17	39.76	54.73	51.15	50.55	38.07	32.9	36.17	37.18	44.88	39.9	41.46	386	292	370	345	319	600	780	495	598	629	557	714	539	452	502	720	863	821	483	471	505	479	779	685
LOC105222428	1.66	1.85	1.65	1.83	1.77	0.84	1.14	1.04	0.69	0.79	0.89	0.87	1.34	0.98	0.98	0.78	0.91	0.97	1.38	1.07	1.26	0.9	1.01	1.01	1.08	133	125	132	128	121	53	97	59	44	58	54	64	74	47	54	45	67	69	77	67	77	51	77	76
LOC105222429	14.06	13.69	13.4	14.18	14.67	4.7	7.07	4.96	5.69	5.3	7.11	6.97	5.75	5.83	6.12	9.19	8.52	9.03	8.74	9.14	11.28	10.86	10.5	11.56	12.09	953	784	909	840	850	251	509	238	308	328	366	433	268	238	287	449	534	545	412	486	585	520	677	737
LOC105222430	185.69	182.88	187.34	180.47	185.23	134.88	161.48	146.23	158.1	149.08	163.94	160.63	155.45	144.29	156.32	181.02	184.96	187.42	179.8	197.83	210.63	206.99	216.87	233.4	216.7	4252	3529	4288	3611	3623	2431	3917	2362	2888	3111	2848	3370	2441	1983	2471	2982	3909	3806	2856	3552	3684	3337	4711	5007
LOC105222431	16.76	17.08	16.79	15.89	16.39	16.25	17.86	17.22	16.61	18.39	17.12	17.07	18.29	15.15	16.04	19.35	18.89	19.93	18.16	20.53	23.04	22.27	22.97	19.34	22.27	798	683	791	661	661	612	913	582	629	799	614	738	601	430	528	659	827	837	600	766	840	749	1030	866
LOC105222432	0	0.03	0.17	0.25	0	0	0.18	0.04	0	0	0	0.03	0.04	0	0	0	0	0.03	0.12	0	0	0.12	0.03	0.06	0.14	0	1	6	8	0	0	7	1	0	0	0	1	1	0	0	0	0	1	3	0	0	3	1	2
LOC105222433	9.13	10.02	8.71	10.32	9.52	3.98	4.87	3.44	4.9	4.14	5.85	5.14	4.98	4.41	5.24	5.24	6.19	6.66	5.79	5.92	5.63	7.04	5.97	6.74	6.49	413	383	394	408	368	142	234	110	177	171	201	213	155	120	164	171	259	268	182	210	195	225	257	287
LOC105222434	8.6	9.91	8.81	9.32	9.96	7.05	8.46	7.76	6.58	7.3	7.93	7.06	7.19	8.01	6.85	7.08	7.19	7.57	7.44	9.14	9.08	8.38	8.96	8.87	8.37	419	402	421	411	411	273	412	259	253	320	279	303	241	227	224	255	336	315	246	341	325	285	401	397
LOC105222435	6.69	6.25	5.23	7.2	4.89	9.71	10.36	7.96	10.68	10.66	8.05	7.77	8.83	8.63	7.25	7.44	7.42	8.01	8.04	8.97	10.69	10.59	8.56	9.96	10.41	152	120	119	143	95	174	250	128	194	221	139	162	138	118	114	122	156	162	127	160	186	170	185	213
LOC105222436	143.45	175.69	149.32	170.62	170.29	231.2	200.24	233.39	156.64	186.92	148.97	135.39	176.32	145.4	168.48	188.65	223.45	200.26	189.47	130.77	165.25	144.1	210.57	146.72	135.62	2590.64	2681.17	2698	2693.35	2628.23	3292.3	3838.71	2980.92	2260.26	3079.89	2043.82	2242.05	2190.45	1580.12	2105.46	2456.49	3731.18	3219.2	2379.1	1852.78	2283.77	1837.6	3617.63	2492.74
LOC105222437	0	0	0	0	0	0.18	0.07	0	0.18	0.39	0.19	0.16	0.1	0	0	0.5	0.85	0.56	0.41	0.27	0.19	0.51	0.38	0.46	0.09	0	0	0	0	0	2	1	0	2	5	2	2	1	0	0	5	11	7	4	3	2	5	5	6
LOC105222438	0	0.04	0	0.04	0	0	0	0	0	0	0	0	0	0	0.05	0.1	0	0.04	0.05	0	0.05	0	0.08	0	0.14	0	1	0	1	0	0	0	0	0	0	0	0	0	0	1	2	0	1	1	0	1	0	2	0
LOC105222439	0.1	0.17	0.03	0.32	0.05	0.05	0.05	0.02	0.04	0.02	0.09	0.09	0.16	0.16	0.15	0.23	0.25	0.1	0.2	0.19	0.19	0.14	0.3	0.1	0.11	17	26	5	50	7	7	10	3	5	4	12	15	19	17	18	29	40	16	24	26	26	18	50	17
LOC105222440	28.14	25.48	27.01	29.19	25.5	24.56	23.5	23.49	21.24	23.3	27.83	29.06	27.81	27.54	26	30.13	30.93	30.97	31.72	30.94	25.93	26.06	29.79	29.9	27.83	2646	2025	2541	2399	2049	1821	2346	1562	1596	1999	1988	2506	1799	1558	1692	2043	2689	2592	2074	2282	1866	1730	2665	2645
LOC105222441	6.14	5.6	6.02	6.21	5.85	5.94	5.3	6.45	5.87	5.78	4.59	4.11	4.93	5.38	5.02	5.52	4.79	4.77	4.98	4.41	3.29	4.27	4.36	4.26	4.56	436	336	428	386	355	333	400	324	333	375	248	268	241	230	247	283	315	302	246	246	179	214	295	285
LOC105222442	7.94	6.92	7.64	7.31	7.62	9.15	8.31	7.27	8.46	7.81	4.73	4.38	5.84	6.07	5.72	6.59	4.67	5.3	4.42	6.25	5.41	6.03	4.42	5.05	4	261	192	251	210	214	237	290	169	222	234	118	132	132	120	130	156	142	155	101	161	136	140	138	156
LOC105222443	15.07	16.04	15.24	16.33	15.62	19.99	20.11	17.75	20.01	21.2	19.73	21.27	20.26	21.63	19.96	19.55	17.93	20.44	20.27	20.58	20.16	20.39	21.63	20.56	21.59	588	529	595	557	521	615	833	490	624	755	585	761	544	508	539	550	647	710	550	630	602	562	803	755
LOC105222444	0.08	0	0.02	0	0	0	0.02	0	0	0	0	0	0	0	0	0	0	0.02	0	0	0	0	0.02	0	0	4	0	1	0	0	0	1	0	0	0	0	0	0	0	0	0	0	1	0	0	0	0	1	0
LOC105222445	0	0	0	0	0	0	0	0	0	0	0	0	0	0	0	0	0	0	0	0	0	0	0	0	0	0	0	0	0	0	0	0	0	0	0	0	0	0	0	0	0	0	0	0	0	0	0	0	0
LOC105222446	2.67	2.55	2.31	2.4	2.77	1.7	1.77	1.34	1.71	1.52	1.79	1.37	1.22	1.48	1.41	2.17	1.83	1.7	2.06	2.39	1.38	1.56	1.52	1.61	1.84	466	376	404	367	413	234	328	166	239	243	237	220	147	156	170	273	295	265	250	328	185	192	252	265
LOC105222447	1.33	1.65	0.78	0.7	1.4	4.27	4.27	3.34	2.8	1.49	26.04	18.47	26.36	23.08	18.15	25.33	26.26	21.75	18.67	15.1	26.15	21.32	23.59	32.35	26.13	41	43	24	19	37	104	140	73	69	42	611	523	560	429	388	564	750	598	401	366	618	465	693	940
LOC105222448	0.12	0.21	0.09	0.24	0.16	0.02	0.08	0.1	0.11	0.23	0.05	0.11	0.08	0.06	0.08	0	0.25	0.08	0.2	0.18	0.27	0.25	0.26	0.17	0.18	7	10	5	12	8	1	5	4	5	12	2	6	3	2	3	0	13	4	8	8	12	10	14	9
LOC105222449	4.31	3.04	3.32	3.88	3.74	4.47	3.47	3.82	4.57	4.29	3.86	5.2	3.92	5.2	4.28	4.43	5.48	4.44	5.16	5.5	4.9	5.36	6.57	6.12	6.04	131	78	101	103	97	107	112	82	111	119	89	145	82	95	90	97	154	120	109	131	114	115	190	175
LOC105222450	39.81	38.64	52.12	40.63	53.16	18.83	22.43	15.26	18.51	19.33	12.76	13.55	10.66	10.09	12.03	22.06	20.73	18.31	22.22	30.37	25.61	26.7	24.31	24.23	24.92	2899	2378	3797	2586	3308	1081	1734	786	1077	1284	706	905	534	442	606	1158	1396	1187	1125	1735	1427	1373	1684	1660
LOC105222451	20.06	19.43	20.05	17.31	17.39	4.91	5.34	4.78	4.46	5.36	3.74	4.53	3.22	2.66	4.03	5.99	5.84	5.6	6.67	5.83	6.14	7.4	6.17	6.86	7.69	599	493	603	456	448	116	167	100	104	145	85	123	63	47	82	128	161	150	137	134	140	154	175	190
LOC105222452	324.64	318.23	322.08	307.56	288.9	331.07	332.05	338.85	326.04	324.2	327.21	349.77	309.55	335.8	321.53	292.76	314.66	305.49	296.34	287.66	268.67	281.65	288.07	299.3	266.17	3671	3041	3644	3040	2792	2952	3986	2710	2946	3345	2811	3627	2408	2285	2516	2387	3290	3075	2330	2552	2325	2249	3099	3184
LOC105222453	1.57	1.12	1.77	1.18	1.09	1.22	1.44	1.34	1.36	0.85	1.38	1.37	1.35	1.43	1.07	1.41	1.51	1.55	1.51	2.17	1.82	1.68	1.74	1.65	1.59	91	55	103	60	54	56	89	55	63	45	61	73	54	50	43	59	81	80	61	99	81	69	96	90
LOC105222454	67.4	58	18.03	56.72	23.09	168.23	152.86	101.57	124.41	170.5	46.2	40.3	15.51	38.45	29.39	6.24	8.89	3.89	5.39	2.89	0.86	0.62	0.6	0.2	2.63	2141	1557	573	1575	627	4214	5155	2282	3158	4942	1115	1174	339	735	646	143	261	110	119	72	21	14	18	6
LOC105222455	0.22	0.1	0	1.4	0.05	7.35	2.34	3.14	6.33	1.82	2.75	2.38	1.01	2.17	0.82	2	1.18	0.59	0.69	1.5	0.34	0.37	0.73	0.05	0.5	5	2	0	28	1	133	57	51	116	38	48	50	16	30	13	33	25	12	11	27	6	6	16	1
LOC105222456	4.08	2.86	2.34	1.47	2.65	0.38	0.5	0.32	0.95	0.58	0.3	0.99	0.22	0.88	1.09	0.73	1.06	0.42	0.54	0.77	0.49	1.07	0.24	0.64	0.96	54	32	31	17	30	4	7	3	10	7	3	12	2	7	10	7	13	5	5	8	5	10	3	8
LOC105222457	4.88	6.32	5.15	5.11	5.82	6.71	7.73	7.93	8.22	7.15	7.03	8.36	7.96	7.73	7.05	7.28	6.66	7.02	6.1	6.92	6.2	6.07	8.49	7.27	6.93	107	117	113	98	109	116	180	123	144	143	117	168	120	102	107	115	135	137	93	119	104	94	177	150
LOC105222458	24.01	23.55	20.96	24.1	21.4	17.74	19.93	16.28	17.57	20.68	16.69	16.48	18.37	16.57	16.91	19.02	16.22	18.68	18.17	17.68	18.59	16.51	19.59	18.5	17.7	1028	852	898	902	783	599	906	493	601	808	543	647	541	427	501	587	642	712	541	594	609	499	798	745
LOC105222459	4.53	4.17	3.79	3.31	4.61	9.63	8.86	8.24	9.2	8.83	11.54	8.87	10.11	9.69	9.77	11.41	11.79	10.48	10.99	10.02	10.91	10.48	10.79	11.17	9.76	185	144	155	118	161	310	384	238	300	329	358	332	284	238	276	336	445	381	312	321	341	302	419	429
LOC105222460	1.04	0.85	0.86	1.29	0.9	1.54	0.68	0.38	0.79	1.29	1.66	0.98	1.57	0.82	1.04	1.19	1.41	1.22	1.3	0.63	1.53	0.96	1.23	0.48	1.08	23	16	19	25	17	27	16	6	14	26	28	20	24	11	16	19	29	24	20	11	26	15	26	10
LOC105222461	16.47	16.47	11.21	9.86	24.58	6.72	5.47	5.33	5.3	5.92	10.94	10.17	13.86	8.47	10.46	11.88	9.48	8.25	10.63	9.94	10.19	9.96	10.29	10.13	11.42	323	273	220	169	412	104	114	74	83	106	163	183	187	100	142	168	172	144	145	153	153	138	192	187
LOC105222462	0.52	0.45	0.38	0.7	0.55	0.12	0.22	0.2	0.18	0.41	0.31	0.83	0.76	0.08	0.34	0.52	0.77	0.11	0.68	0.42	0.43	0.07	0.3	0.4	0.3	11	8	8	13	10	2	5	3	3	8	5	16	11	1	5	8	15	2	10	7	7	1	6	8
LOC105222463	1.37	0.85	1.3	1.49	1.53	0.5	0.12	0.83	0.24	0	0.6	0.28	1.9	0.22	0.57	1.54	0.63	0.44	1.22	0.66	1.11	0.37	0.34	0.83	1.07	21	11	20	20	20	6	2	9	3	0	7	4	20	2	6	17	9	6	13	8	13	4	5	12
LOC105222464	9.87	7.79	4.63	7.68	8.02	6.3	8.67	6.17	6.47	5.23	13.61	12.45	20.11	23.33	16.01	15.65	11.48	8.9	15.65	13.18	14.13	14.74	16.45	12.99	12.15	147	98	69	100	102	74	137	65	77	71	154	170	206	209	165	168	158	118	162	154	161	155	233	182
LOC105222465	0.82	0.61	0.77	0.91	0.77	0.54	0.33	0.4	0.37	0.47	0.76	0.29	0.91	0.82	0.5	0.53	0.61	0.61	0.47	0.48	0.47	0.56	0.83	0.42	0.48	50	31	47	48	40	26	21	17	18	26	35	16	38	30	21	23	34	33	20	23	22	24	48	24
LOC105222466	3.64	3.09	3.1	4.31	3.7	8.01	6.47	5.24	5.7	5.46	9.99	9.21	14.13	9.99	9.3	11.79	7.69	6.48	8.3	7.74	8.97	10.58	6.77	9.62	10.76	60	43	51	62	52	104	113	61	75	82	125	139	160	99	106	140	117	95	95	100	113	123	106	149
LOC105222467	1.6	1.42	0.93	1.15	0.55	0.59	0.31	1.13	0.42	0.44	0.44	0.95	0.58	0.44	0.77	2.04	0.65	0.45	1.25	0.77	1.22	0.95	1.19	1.99	1.44	24	18	14	15	7	7	5	12	5	6	5	13	6	4	8	22	9	6	13	9	14	10	17	28
LOC105222468	3.55	4.79	3.11	4	5.97	2.39	2.4	1.73	3.33	4.07	3.51	2.97	2.9	3.5	3.85	3.23	2.64	2.68	3.51	3.47	3.84	4.32	4.67	3.13	4.91	64	73	56	63	92	34	46	22	48	67	48	49	36	38	48	42	44	43	44	49	53	55	80	53
LOC105222469	0.12	0.21	0.06	0.07	0.07	0.15	0.22	0.17	0.15	0.19	0.23	0.13	0.17	0.2	0	0.08	0.13	0.26	0.17	0.45	0.31	0.33	0.56	0.25	0.3	2	3	1	1	1	2	4	2	2	3	3	2	2	2	0	1	2	4	2	6	4	4	9	4
LOC105222470	15.5	14.13	12.9	14.67	14.07	11.6	12.15	10.96	13.2	12.61	12.83	11.67	11.73	13.08	12.76	12.8	9.76	10.99	11.89	10.95	10.91	13.29	10.92	13.2	14.25	388	299	323	321	301	229	323	194	264	288	244	268	202	197	221	231	226	245	207	215	209	235	260	311
LOC105222471	1.03	1.06	1	1	0.51	0.69	0.7	0.62	0.41	0.55	0.55	0.48	0.73	0.51	0.85	0.94	0.33	0.69	0.28	0.39	0.66	0.65	0.76	0.77	0.63	47	41	46	40	20	25	34	20	15	23	19	20	23	14	27	31	14	28	9	14	23	21	33	33
LOC105222472	1.25	0.78	1.25	1.08	1.18	1.13	1.32	1.06	1.2	1.37	0.59	1.24	0.46	0.66	0.67	1.8	1.71	1.38	1.45	1.79	1.17	1.72	1.02	1.24	1.31	78	41	78	59	63	56	88	47	60	78	28	71	20	25	29	81	99	77	63	88	56	76	61	73
LOC105222473	0	0	0	0.03	0	0	0	0	0	0	0	0.03	0	0	0	0	0	0	0	0	0	0.07	0	0	0	0	0	0	1	0	0	0	0	0	0	0	1	0	0	0	0	0	0	0	0	0	2	0	0
LOC105222476	0.09	0	0	0.03	0	0.23	0.29	0.04	0	0.3	0	0.07	0	0	0	0	0	0	0	0	0	0	0	0	0	3	0	0	1	0	6	10	1	0	9	0	2	0	0	0	0	0	0	0	0	0	0	0	0
LOC105222477	49.65	48.2	23.69	42.18	25	16.94	12.09	11.4	16.65	7.84	10.3	6.03	8.39	10.07	8.48	3.84	3.1	6.32	4.32	1.95	1.31	1.82	3.96	1.57	1.63	1041	854	497	773	448	280	269	169	279	150	164	116	121	127	123	58	60	118	63	32	21	27	79	31
LOC105222478	0.7	0.66	0.52	0.54	0.77	0.48	0.46	0.16	0.39	0.39	0.26	0.39	0.4	0.31	0.15	0.43	0.4	0.29	0.24	0.77	0.38	0.44	0.43	0.41	0.53	72	57	54	49	68	39	50	12	32	37	20	37	28	19	11	32	38	27	17	62	30	32	42	40
LOC105222479	70.76	74.5	75.15	71.15	71.21	61.37	59.63	57.13	58.94	60.62	57.16	53.94	62.68	58.38	60.54	52.86	49.65	54.8	56.9	56.96	55.99	53.81	47.45	54.49	50.68	1851	1647	1967	1627	1592	1266	1656	1057	1232	1447	1136	1294	1128	919	1096	997	1201	1276	1035	1169	1121	994	1181	1341
LOC105222480	4.65	7.13	6.04	6.25	5.9	9.94	10.32	11.51	11.37	11.71	10.1	10.64	11.46	10.71	12.14	10.23	9.87	11.41	8.96	9.28	10	11.69	9.26	10.68	9.97	177	221	220	205	187	278	393	297	323	381	273	343	283	227	301	267	327	362	223	262	281	294	311	359
LOC105222481	0.15	0.05	0.06	0.12	0.09	0.32	0.33	0.4	0.31	0.48	0.43	0.55	0.54	0.54	0.45	0.52	0.75	0.86	1.1	0.97	1.13	1.04	1.1	1.11	0.94	18	5	7	12	9	30	42	34	29	52	39	60	44	39	37	45	82	91	91	91	103	87	124	124
LOC105222482	43.16	43.62	44.87	42.7	43.47	45.13	53.17	46.15	76.71	87.7	67.45	74.78	56.44	80.93	99.68	79.89	45.24	82.49	74.12	114.14	123.21	107.91	68.32	91.5	98.6	747	638	777	646	643	616	977	565	1061	1385	887	1187	672	843	1194	997	724	1271	892	1550	1632	1319	1125	1490
LOC105222483	25.81	25.29	27.6	26.05	25	17.6	18.2	17.3	18.81	15.98	26.75	26.46	21.92	27.13	28.28	34.21	31.05	30.79	34.61	30.8	33.54	35.85	35.43	33.97	35.82	517	428	553	456	428	278	387	245	301	292	407	486	302	327	392	494	575	549	482	484	514	507	675	640
LOC105222484	173.31	186.92	182.46	182.68	179.99	116.79	121.64	127.36	119.93	125.57	164.73	158.25	134.58	153.2	158.88	148.6	146.52	161.37	158.41	168.74	166.1	181.19	149.13	164.29	181.36	3523	3211	3711	3246	3127	1872	2625	1831	1948	2329	2544	2950	1882	1874	2235	2178	2754	2920	2239	2691	2584	2601	2884	3142
LOC105222485	1.07	1.51	1.54	1.61	0.83	0.6	0.38	0.52	0.5	0.18	0.53	0.37	0.2	0.61	0.49	0.28	0.18	0.23	0.58	0.56	0.22	0.05	0.32	0.18	0.08	32	38	46	42	21	14	12	11	12	5	12	10	4	11	10	6	5	6	12	13	5	1	9	5
LOC105222486	16.28	16.07	15.45	17.45	15.23	22.38	19.39	20.33	22.05	24.08	19.84	17.11	18.29	21.33	17.32	19.62	18.03	19.59	19.87	19.67	17.65	21.97	18.52	20.73	21.74	633	528	601	593	506	686	800	559	685	854	586	610	489	499	466	550	648	678	537	600	525	603	685	758
LOC105222487	0	0.01	0.02	0.01	0	0	0.05	0.03	0	0.02	0.07	0	0.09	0.03	0.14	0.06	0.06	0.04	0.06	0.04	0.03	0.04	0.11	0.1	0.11	0	1	2	1	0	0	5	2	0	2	5	0	6	2	9	4	5	3	4	3	2	3	10	9
LOC105222488	0.75	0.49	0.56	0.5	0.82	0.31	0.43	0.41	0.67	0.27	0.51	0.4	0.11	0.28	0.32	0.34	0.52	0.54	0.59	0.71	0.73	0.93	0.87	0.8	1.32	31	17	23	18	29	10	19	12	22	10	16	15	3	7	9	10	20	20	17	23	23	27	34	31
LOC105222489	3.13	2.46	2.08	2.22	2.66	2.33	3.72	2.17	1.66	2.37	6.48	7.96	4.86	3.57	6.55	14.68	15.59	14.31	14.3	20.14	24.06	21.44	23.09	19.88	22.99	194	129	129	120	141	114	245	95	82	134	305	452	207	133	281	656	893	789	616	979	1141	938	1361	1159
LOC105222490	3.1	2.92	2.3	2.17	2.29	3.28	2.92	3.25	4.82	3.27	3.03	2.38	3.51	1.72	2.99	3.59	2.67	2.07	1.9	2.64	2.85	2.28	1.93	2.75	2.69	54	43	40	33	34	45	54	40	67	52	40	38	42	18	36	45	43	32	23	36	38	28	32	45
LOC105222491	9.91	8.19	8.73	8.81	8.05	5.86	8.98	6.13	6.51	6.56	6	6.33	4.87	4.34	6.74	9.72	7.73	7.83	9.67	10.7	10.71	11.42	10.26	11.01	11.53	444	310	391	345	308	207	427	194	233	268	204	260	150	117	209	314	320	312	301	376	367	361	437	464
LOC105222492	13.16	14.28	12.33	15.67	14.64	31.43	40.7	28.6	25.95	25.64	17.25	17.58	27.43	16.07	22.82	18.99	38.1	21.66	21.44	19.57	15.65	15.41	22.82	15.69	12.91	445	408	417	463	423	838	1461	684	701	791	443	545	638	327	534	463	1191	652	504	519	405	368	734	499
LOC105222493	24.81	24.49	22.93	23.77	25.76	10.57	14.97	10.89	10.79	11.61	9.89	13.03	7.85	8.61	10.53	14.82	13.76	14.2	13.07	14.4	15.62	16.8	16.85	18.12	17.9	1447	1207	1338	1212	1284	486	927	449	503	618	438	697	315	302	425	623	742	737	530	659	697	692	935	994
LOC105222494	1.35	0.99	0.91	1	0.87	1.64	1.93	1.61	1.19	1.41	1.33	1.34	1.24	1.4	1.72	2.18	2.25	2.55	1.94	2.13	2.21	2.61	2.67	2.84	2.52	139	86	94	90	77	133	211	117	98	133	104	127	88	87	123	162	214	234	139	172	174	190	262	275
LOC105222495	2.16	1.94	3.13	2.44	3.13	4.01	3.99	2.67	4.3	3.75	3.42	3.96	3.53	3.07	3.79	5.72	5.52	4.32	6.02	6.16	5.98	5.27	5.25	5.98	6.34	144	109	209	142	178	211	282	126	229	228	173	242	162	123	175	275	340	256	279	322	305	248	333	375
LOC105222497	0.08	0.18	0.1	0.41	0.12	0.03	0.02	0	0	0	0.03	0	0	0.04	0.04	0	0	0	0	0.03	0	0.04	0.11	0	0	3	6	4	14	4	1	1	0	0	0	1	0	0	1	1	0	0	0	0	1	0	1	4	0
LOC105222498	0	0	0	0	0	0.03	0	0	0	0	0	0	0	0	0	0	0	0	0	0	0	0	0	0.04	0	0	0	0	0	0	1	0	0	0	0	0	0	0	0	0	0	0	0	0	0	0	0	0	2
LOC105222499	76.22	73.13	74.01	62.53	76.12	33.21	46.47	29.06	31.29	32.89	37.65	42	29.88	31.36	36.78	39.58	40.86	36.93	42.85	45.92	42.55	43.04	45.56	45.14	46.96	2177	1765	2115	1561	1858	748	1409	587	714	857	817	1100	587	539	727	815	1079	939	851	1029	930	868	1238	1213
LOC105222500	3.65	3.19	3.08	3	3.53	2.83	3.71	3.66	3.28	3.15	2.66	3.56	2.68	1.94	2.46	2.41	2.3	1.55	1.89	2.03	1.9	2.16	2.31	2.34	2.92	103	76	87	74	85	63	111	73	74	81	57	92	52	33	48	49	60	39	37	45	41	43	62	62
LOC105222501	0.09	0.11	0.18	0.21	0	0.11	0.17	0	0	0.1	0	0.2	0	0	0	0.12	0.1	0	0.13	0	0.24	0	0	0	0	1	1	2	2	0	1	2	0	0	1	0	2	0	0	0	1	1	0	1	0	2	0	0	0
LOC105222502	0	0.09	0.09	0	0.09	0	0	0	0	0.03	0.05	0	0	0.13	0	0	0.1	0	0.11	0.04	0.1	0.06	0.1	0	0.26	0	2	3	0	2	0	0	0	0	1	1	0	0	2	0	0	3	0	2	1	2	1	3	0
LOC105222503	8.46	7.54	8.59	7.79	7.3	10.06	7.86	8.85	8.15	7.97	6.51	7.09	6.54	6.43	6.57	8.52	9.23	7.7	7.69	8.91	7.86	7.68	8.18	7.45	7.7	928	704	942	748	686	873	918	685	711	795	542	713	494	422	497	679	939	755	586	770	660	597	856	764
LOC105222504	7.11	8	8.33	7.67	7.16	6.8	4.56	4.45	5.4	4.47	4.37	5.02	3.64	4.55	5.56	4.45	5.36	4.12	5.28	5.27	4.72	3.71	5.57	5.39	5.46	122	116	143	115	105	92	83	54	74	70	57	79	43	47	66	55	85	63	63	71	62	45	91	87
LOC105222506	11.97	11.52	11.38	13.87	11.68	8.4	10.78	9.5	13.46	14.16	8.11	7.51	5.8	9.06	7.67	6.89	3.82	6.64	4.1	6.98	5.72	7.86	6.93	5.69	6.65	492	400	468	498	410	272	470	276	442	531	253	283	164	224	218	204	145	243	117	225	180	228	271	220
LOC105222507	0	0.03	0.03	0.48	0	0	0.24	0	0	0	0.04	0.03	0	0	0.16	0	0	0.03	0	0	0	0	0	0	0	0	1	1	15	0	0	9	0	0	0	1	1	0	0	4	0	0	1	0	0	0	0	0	0
LOC105222508	10.56	9.92	9.71	8.88	10.67	6.57	7.26	6.37	6.99	7.17	8.34	8.42	6.02	7.79	9.01	10.16	8.45	8.42	9.75	10.46	11.11	10.99	10.02	10.52	10.45	872	692	802	641	753	428	636	372	461	540	523	638	342	387	515	605	645	619	560	678	702	641	787	817
LOC105222509	195.66	204.4	205.41	207.15	198.11	149.89	180.33	146.53	164.85	169.53	198.08	195.32	177.06	194.14	195.26	226.27	220.73	225.29	230.35	252.89	239.25	236.37	204.82	224.05	217.2	6289	5552	6606	5820	5442	3799	6153	3331	4234	4972	4837	5757	3915	3755	4343	5244	6560	6446	5148	6377	5885	5365	6263	6775
LOC105222510	12.78	11.22	11.43	11.26	10.82	14.71	13.3	12.56	14.66	13.41	10.43	12	12.49	12.06	17.91	11.18	11.22	11.29	10.73	12.36	11.14	13.01	11.58	11.91	13.68	385	286	345	297	279	350	426	268	353	369	239	332	259	219	374	243	313	303	225	292	257	277	332	338
LOC105222511	2.68	2.43	2.44	2.76	3.29	3.69	3.71	3.97	3.48	4.7	3.61	3.46	3.84	3.96	2.87	3.44	3	3.64	3.66	2.65	3.11	3.93	2.84	3.3	2.47	81	62	75	73	85	88	119	85	84	130	83	96	80	72	60	75	84	98	77	63	72	84	82	94
LOC105222512	936.43	932.84	956.81	892.82	940.66	868.29	752.61	842.67	880.16	796.46	711.94	770.94	689.03	732.05	778.61	604.83	607.13	580.57	627.74	545.08	502.88	488.65	580.6	550.92	482.73	9957	8382	10179	8298	8548	7280	8495	6337	7478	7727	5751	7517	5040	4684	5729	4637	5969	5495	4641	4547	4092	3669	5873	5511
LOC105222513	20.07	17.68	17.78	18.86	19.36	27.09	24.09	22.74	26.2	28.75	26.62	23.36	27.04	30.54	29.63	29.33	23.39	26.29	25.22	30.95	30.31	28.91	19.94	21.46	25.42	311	232	275	255	256	331	396	249	324	407	313	332	287	285	318	328	335	363	272	376	358	317	294	311
LOC105222514	38.4	38.97	36.06	37.78	35.22	39.1	34.62	35.43	38.2	37.43	33.19	30.76	32.26	34.49	34.8	33.49	27.8	31.48	30.6	30.08	31.11	31.08	31.32	28.65	27.5	1258	1079	1182	1082	986	1010	1204	821	1000	1119	826	924	727	680	789	791	842	918	697	773	780	719	976	883
LOC105222515	1.65	1.74	0.87	1.19	1.25	1.76	0.87	1	1.8	1.79	0.93	0.7	0.47	1.01	0.72	1.02	0.38	0.66	0.13	0.63	0.46	0.08	0.68	0.75	0.88	57	51	30	36	37	48	32	25	49	56	24	22	11	21	17	25	12	20	3	17	12	2	22	24
LOC105222516	11.28	14.2	9.94	12.31	10.23	8.23	8.73	10.47	8.9	10.94	8.54	7.36	8.72	8.83	8.11	6.02	6.81	6.12	6.1	5.61	5.37	4.53	6.96	5.93	5.98	346	368	305	330	268	199	284	227	218	306	199	207	184	163	172	133	193	167	130	135	126	98	203	171
LOC105222518	0	0	0.23	0.11	0.05	0.7	0.48	0.26	0.29	0.45	0.24	0.35	0.33	0.31	0.27	0.26	0.35	0.31	0.46	0.18	0.36	0.52	0.24	0.15	0.35	0	0	5	2	1	12	11	4	5	9	4	7	5	4	4	4	7	6	7	3	6	8	5	3
LOC105222519	0.04	0.1	0.04	0.08	0.02	0.03	0.05	0.06	0	0	0	0.04	0.04	0.05	0.02	0.06	0.12	0.05	0	0	0.11	0.02	0.19	0.07	0.02	3	6	3	5	1	2	4	3	0	0	0	3	2	2	1	3	8	3	0	0	6	1	13	5
LOC105222520	0	0	0	0	0	0	0	0	0	0	0	0	0	0	0	0	0	0	0	0	0	0	0	0	0	0	0	0	0	0	0	0	0	0	0	0	0	0	0	0	0	0	0	0	0	0	0	0	0
LOC105222521	0	0	0	0	0.11	0.12	0.73	0.76	0.73	0.16	1.41	0.48	0.64	0.65	0.28	0.61	0.37	0.6	0.35	0.12	0.32	0.21	1.07	1.09	0.49	0	0	0	0	2	2	16	11	12	3	22	9	9	8	4	9	7	11	5	2	5	3	21	21
LOC105222522	11.73	19.04	26.69	12.6	29.71	10.97	8.93	9.67	12.42	10.29	9.16	8.77	10.95	11.02	8.54	6.82	6.52	7.81	6.97	6.71	5.06	5.81	7.26	6.43	5.81	506	694	1152	475	1095	373	409	295	428	405	300	347	325	286	255	212	260	300	209	227	167	177	298	261
LOC105222523	0.21	0	0.15	0.27	0	1.98	2.97	5.42	13.03	3.52	0.82	0.58	0.47	1.08	3.79	1.43	0.1	2.19	0.13	0.83	0.42	0.54	0.47	0.22	0.37	7	0	5	8	0	53	107	130	353	109	21	18	11	22	89	35	3	66	3	22	11	13	15	7
LOC105222524	0	0	0.26	0	0	0.19	0.21	0.16	0.23	0.53	0.1	0.08	0	0.19	0.05	0	0.04	0.17	0	0.05	0.05	0.16	0.2	0.04	0.33	0	0	7	0	0	4	6	3	5	13	2	2	0	3	1	0	1	4	0	1	1	3	5	1
LOC105222525	5.2	6.15	4.93	4.86	4.71	12.56	12.84	12.57	17.47	15.84	14.85	13.05	12.93	14.62	14.22	11.74	11.03	10.76	11.71	10.29	14.31	14.45	11.38	13.03	10.26	159	159	151	130	123	303	417	272	427	442	345	366	272	269	301	259	312	293	249	247	335	312	331	375
LOC105222526	16.04	15.42	15.78	17.59	16.66	28.39	31.26	26.54	25.91	26.28	39.52	34.7	37.93	35.12	33.56	35.3	36.56	36.24	37.52	34.91	35.33	37.15	34.33	37.12	35.69	913.2	741.57	899	877.13	811.48	1274.54	1891.56	1070.5	1181.01	1364.17	1715.75	1816.96	1484.4	1204.59	1322.89	1452.04	1927.74	1839.9	1490.4	1560.45	1541.46	1497.02	1865.05	1989.23
LOC105222527	0	0	0	0.04	0	0	0	0	0	0.07	0	0.03	0	0	0	0	0	0.03	0	0.04	0.12	0.04	0.13	0	0	0	0	0	1	0	0	0	0	0	2	0	1	0	0	0	0	0	1	0	1	3	1	4	0
LOC105222528	22.03	21.49	18.86	20.13	19.98	8.55	9.38	8.22	10.16	9.22	8.87	9.41	8.49	9.74	9.79	9.46	9.91	11.38	10.06	9.71	11.29	10.51	10.09	10.83	11.35	952.8	785.43	816	760.87	738.52	291.46	430.44	251.5	350.99	363.83	291.25	373.04	252.6	253.41	293.11	294.96	396.26	438.1	302.6	329.55	373.54	320.98	414.95	440.77
LOC105222529	19.43	18.09	18.31	15.35	19.66	22.64	23.25	19.22	25.85	26.41	26.11	23.35	21.8	27.34	24.37	22.66	19.24	21.5	22.91	27.74	27.67	22.72	24.59	27.04	22.44	333	262	314	230	288	306	423	233	354	413	340	367	257	282	289	280	305	328	273	373	363	275	401	436
LOC105222530	43.13	38.67	38.96	39.01	36.21	18.46	20.04	16.19	17.42	17.91	19.29	26.07	20.24	17.81	22.47	26.74	30.11	26.44	26.82	29.4	27.94	29.91	30.32	31.38	30.77	821	622	742	649	589	277	405	218	265	311	279	455	265	204	296	367	530	448	355	439	407	402	549	562
LOC105222531	14.46	15.47	15.84	16.05	14.62	15.29	15.28	17.56	16.46	14.49	14.81	16.81	20.71	18.33	16.57	18.74	19.83	21.01	15.23	21.51	18.52	17.69	14.67	17.32	19.69	198	179	217	192	171	165	222	170	180	181	154	211	195	151	157	185	251	256	145	231	194	171	191	223
LOC105222532	44.77	42.31	41.65	45.29	46.65	53.06	54.53	52.31	56.94	57.76	64.04	61.9	53.94	60.36	60.13	65.21	63.03	59.15	68.84	62.16	67.18	68.74	62.74	70.03	65.33	795	635	740	703	708	743	1028	657	808	936	864	1008	659	645	739	835	1035	935	850	866	913	862	1060	1170
LOC105222533	9.13	8.1	7.95	6.98	8.94	7.67	6.9	7.13	10.49	10.64	9.71	7.35	8.18	8.55	9.05	6.03	7.29	7.21	9.69	9.13	10.05	9.02	9.26	7.78	11.21	172	129	150	115	144	114	138	95	158	183	139	127	106	97	118	82	127	121	127	135	145	120	166	138
LOC105222534	0	0	0	0.07	0	0	0.06	0	0	0	0	0	0	0	0.04	0	0.03	0	0.07	0	0	0.08	0.03	0.06	0.11	0	0	0	2	0	0	2	0	0	0	0	0	0	0	1	0	1	0	2	0	0	2	1	2
LOC105222535	1.99	2.21	1.37	2.56	0.93	16.7	16.25	16.48	17.15	13.27	16.61	14.32	13.67	15.75	14.49	18.17	20.5	19.63	16.59	16.66	17.32	15.33	16.08	14.9	17.52	66	62	45	74	26	429	561	379	446	394	411	428	306	309	327	427	617	569	376	426	432	353	498	456
LOC105222536	98.87	105.67	108.58	112.84	105.05	69.61	76.7	73.58	87.55	81.36	88.67	88.01	78.15	95.02	93.07	80.68	72.66	79.89	78.93	87.98	82.08	83.77	51.5	66.12	67.25	2282	2053	2499	2284	2072	1278	1888	1210	1626	1732	1582	1903	1251	1342	1503	1359	1579	1659	1292	1617	1463	1386	1158	1463
LOC105222537	8.84	4.9	5.26	4.57	3.3	2.92	3.83	3.23	2.53	3.24	2.3	2.7	1.79	3.29	1.79	2.12	2.66	3.93	1.56	2.44	3.42	2.36	2.18	1.98	3.08	222.73	104.21	132.61	100.61	71	58	102.45	57.45	51	74.36	44	62.41	31	49.82	31.25	38.57	62	88	27.28	48.18	66	42	52.13	47
LOC105222539	7.64	7.61	7.25	7.71	7.75	4.63	5.95	4.9	3.88	4.34	5.95	5.72	4.47	5.56	4.62	10.75	9.49	9.1	9.69	9.13	11.35	11.32	11.85	11.48	13.52	692	583	658	611	600	331	573	313	280	359	410	475	279	302	290	701	796	735	611	650	788	725	1020	980
LOC105222540	28.91	23.24	22.75	23.19	23.61	21.17	44.05	23.35	29.28	41.51	41.96	44.71	25.39	33.42	50.38	69.85	43.48	64.89	57.95	91.13	121.03	123.76	93.6	102.18	117.87	1278	868	1006	896	892	738	2067	730	1034	1674	1409	1812	772	889	1541	2226	1777	2553	1781	3160	4094	3863	3936	4249
LOC105222541	2.91	2.97	2.59	2.87	3.12	4.31	3.88	2.17	3.14	3.32	3.41	4.41	5.11	4.57	3.39	5.78	4.72	6	5.23	4.48	5.97	6.07	4.55	6.7	5.83	72	62	64	62	66	84	102	38	62	75	64	100	87	68	58	103	108	132	90	87	113	106	107	156
LOC105222542	0	0	0	0	0	0	0	0	0	0	0	0	0	0	0	0	0	0	0	0	0	0	0	0	0	0	0	0	0	0	0	0	0	0	0	0	0	0	0	0	0	0	0	0	0	0	0	0	0
LOC105222543	0	0	0	0	0	0	0	0.11	0	0	0	0	0.11	0.12	0	0	0	0	0.32	0	0	0	0	0	0	0	0	0	0	0	0	0	1	0	0	0	0	1	1	0	0	0	0	3	0	0	0	0	0
LOC105222544	1.04	1.14	0.74	1.11	1.22	5.94	3.99	3.37	4.37	3.5	5.38	2.92	3.78	1.73	2.9	5.36	3.22	3.68	5.24	1.9	3.21	3.37	2.97	3.95	3.01	14	13	10	13	14	63	57	32	47	43	55	36	35	14	27	52	40	44	49	20	33	32	38	50
LOC105222545	402.49	287.2	363.09	285.46	363.64	164.9	146.16	184.11	175.44	154.92	127.23	136.66	128.89	118.77	143.64	103.47	100.58	99.04	136.49	99.04	80.14	74.81	94.26	121.53	98.16	4612	2779	4160	2859	3563	1487	1775	1490	1603	1617	1105	1432	1014	816	1135	853	1062	1008	1085	888	701	603	1024	1307
LOC105222546	5.35	4.59	4.27	5.17	4.34	1.97	4.01	1.88	2.52	2.32	2.24	2.74	2.05	2.03	2.61	5.32	4.85	4.5	4.77	4.73	4.72	5.87	5.25	5.36	5.25	258	187	206	218	179	75	205	64	97	102	82	121	68	59	87	185	216	193	160	179	174	200	241	243
LOC105222547	0	0	0	0.06	0	0	0	0	0.19	0.05	0	0.05	0	0	0	0	0.05	0.06	0.07	0.06	0	0.35	0.21	0	0.13	0	0	0	1	0	0	0	0	3	1	0	1	0	0	0	0	1	1	1	1	0	5	4	0
LOC105222548	5.26	5.12	5.19	5.15	5.57	3.51	3.97	3.82	4.02	3.77	4.58	4.45	4.29	4.62	3.89	4.94	5.77	5.31	6.26	6.11	5.63	5.93	6.32	6.4	6.86	502	414	496	430	455	265	402	258	307	329	332	390	282	266	257	340	509	451	415	457	411	400	574	575
LOC105222549	26.31	26.53	25.93	26.36	26.6	38.2	38.18	37.95	45.54	47.12	38	36.45	39.78	37.14	37.39	38.16	31.35	37.97	37.28	40.72	39.02	37.14	33.9	39.03	39.06	883	752	870	773	763	1011	1360	901	1221	1442	969	1122	918	750	868	923	973	1134	870	1072	1002	880	1083	1232
LOC105222550	47.95	52.41	43.32	58.49	45.76	30.64	27.86	27.82	28.14	29.43	26.86	27.43	27.31	25.29	24.49	29.41	26.42	26.51	23.59	24.7	22.81	23.88	28.27	25.33	26.84	1775	1639	1604	1892	1448	894	1095	728	832	994	755	931	695	563	627	785	904	873	608	717	646	624	995	883
LOC105222551	3.55	4.52	3.36	5.31	4.18	10.24	9.5	10.49	10.04	9.72	11.53	10.36	9.65	9.99	9.45	12.05	10.66	11.41	10.9	11.07	9.98	9.86	10.57	11.99	11.86	249	268	236	326	251	567	708	521	563	623	615	667	466	422	459	610	692	713	532	610	536	489	706	792
LOC105222552	0.65	0.51	0.29	0.38	0.23	4.45	4.01	1.77	4.31	5.51	0.11	0.15	0.1	0.28	0.16	0.02	0.11	0.03	0.04	0.05	0.04	0.02	0.07	0	0.09	47	31	21	24	14	253	307	90	248	362	6	10	5	12	8	1	7	2	2	3	2	1	5	0
LOC105222553	19.52	20.24	18.3	19.27	16.11	21.61	20.28	20.19	21.75	23.25	20.33	19.52	18.32	20.97	20.53	20.64	19.81	19.04	20.3	18.67	19.03	19.71	21.41	21.78	21.12	727	636	683	628	514	630	797	528	641	782	570	661	472	466	521	551	681	632	527	546	540	519	758	764
LOC105222554	49.65	61.26	58.6	54.22	61.11	32.88	30.56	30.86	30.99	31.38	23.05	22.14	27.26	26.13	21.57	20.94	21.58	21.32	22.4	19	22.2	20.71	22.84	21.8	20.48	2631	2722	3106	2526	2768	1390	1729	1157	1326	1531	928	1077	1000	838	799	805	1056	1013	828	808	909	789	1162	1097
LOC105222555	0.04	0.08	0.06	0.05	0.1	0.05	0.06	0.12	0.11	0	0.28	0.02	0.03	0.11	0.06	0.09	0	0.07	0.09	0.05	0.06	0.06	0.07	0.05	0.05	2	3	3	2	4	2	3	4	4	0	10	1	1	3	2	3	0	3	3	2	2	2	3	2
LOC105222556	0.5	0.3	0.14	0.1	0.19	0.09	0.17	0.23	0.36	0.32	0.33	0.2	0.16	0.18	0.16	0.27	0.37	0.38	0.26	0.8	0.68	1.12	0.7	0.82	0.71	28	14	8	5	9	4	10	9	16	16	14	10	6	6	6	11	19	19	10	35	29	44	37	43
LOC105222557	0.29	0.79	0.37	0.47	0.24	2.26	1.29	1.99	1.71	1.41	1.53	1.04	1.87	1.17	1.38	0.92	1.57	1.26	1.37	0.63	0.87	1.59	1.13	1.63	1.99	7	16	9	10	5	43	33	34	33	31	28	23	31	17	23	16	35	27	23	12	16	27	26	37
LOC105222558	1.75	2.13	2.22	2.85	1.73	5.04	5.32	4.64	5.49	5.03	4.87	5.38	4.55	4.26	5.56	5.03	4.93	5.9	5.89	3.84	5.58	5.76	6.74	5.45	6.27	71	73	90	101	60	161	229	133	178	186	150	200	127	104	156	147	185	213	166	122	173	165	260	208
LOC105222559	16.6	16.92	17.32	17.33	18.58	25.21	21.46	17.82	24.87	26.03	21.22	20.22	19.56	20.54	27.67	20.67	20.19	18.65	15.86	17.3	17.26	20.25	23.31	15.97	18.25	137	118	143	125	131	164	188	104	164	196	133	153	111	102	158	123	154	137	91	112	109	118	183	124
LOC105222560	12.51	11.91	12.38	12.66	8.39	19.46	18.84	18.94	19.12	15.16	18.04	15.91	24.22	19.23	18.54	19.1	16.25	14.98	16.91	13.87	17.34	16.47	14.28	14.44	16.31	199	160	197	176	114	244	318	213	243	220	218	232	265	184	204	219	239	212	187	173	211	185	216	216
LOC105222561	11.42	6.97	8.83	9.14	9.92	5.89	7.9	5.49	6.65	6.46	9.22	7.64	7.2	6.45	6.26	8.85	8.25	8.32	7.96	6.77	6.82	9.54	8.44	7.73	7	256	132	198	179	190	104	188	87	119	132	157	157	111	87	97	143	171	166	124	119	117	151	180	163
LOC105222562	16.1	14.09	13.73	16.62	13.78	18.01	13.99	17.76	18.01	13.98	15.33	18.48	17.02	18.59	15.32	16.97	17.41	16.91	14.59	13.59	17.1	13.99	16.16	17.25	11.92	246	182	210	222	180	217	227	192	220	195	178	259	179	171	162	187	246	230	155	163	200	151	235	248
LOC105222563	0	0.33	0	0	0	0	0	0	0	0	0	0	0	0	0	0	0	0	0	0	0.18	0	0.15	0	0	0	2	0	0	0	0	0	0	0	0	0	0	0	0	0	0	0	0	0	0	1	0	1	0
LOC105222564	7.37	8.5	6.1	5.43	6.24	3.04	3.02	3.64	2.15	3.12	3.45	2.91	3.48	2.78	3.72	4.2	4.06	3.1	4.03	4.49	4.67	3.01	4.32	3.94	4.92	163	159	135	105	118	53	71	57	38	63	58	59	53	37	57	67	83	61	62	78	79	47	91	82
LOC105222565	980.18	1042.03	1039.56	992.88	959.62	957.62	920.36	1025.05	920.57	958.85	758.43	782.17	816.57	792.94	721.24	586.03	627.93	587.94	599.63	507.05	483.8	460.35	555.84	537.34	515.8	21984	19750	23328	19465	18394	16936	21913	16260	16498	19622	12923	16087	12599	10702	11194	9477	13022	11738	9351	8922	8304	7291	11860	11338
LOC105222566	50.32	43.91	46.4	44.64	47.34	88.93	93.67	85.7	120.54	132.74	90.05	96.83	74.57	103.9	107.76	105.26	76.05	98.22	84.32	111.89	112.16	117.41	89.32	103.88	108.55	1291	952	1191	1001	1038	1799	2551	1555	2471	3107	1755	2278	1316	1604	1913	1947	1804	2243	1504	2252	2202	2127	2180	2507
LOC105222567	47.1	44.23	42.86	44.25	44.63	24.76	29.47	23.81	26.99	28.05	22.4	24.4	19.95	22.39	26.48	29.52	24.41	26.77	25.34	32.27	30.96	30.18	20.3	27.58	27.43	1922	1531	1753	1515	1499	934	1775	821	1044	1289	905	1200	572	570	943	1152	1128	1336	934	1402	1401	1328	1170	1493
LOC105222568	6.87	6.25	7.98	6.35	6.93	5.88	10.7	6.45	6.24	7.09	8.65	8.49	5.08	3.42	9.21	11.93	10.75	11.59	10.52	15.01	18.01	18.01	15.22	16.34	17.97	277	213	322	224	239	187	458	184	201	261	265	314	141	83	257	347	401	416	295	475	556	513	584	620
LOC105222569	6.17	8.93	7.24	6.47	7.32	11.87	8.45	11.16	8.48	10.64	5.85	6.02	6.52	7.53	4.93	8.02	5.27	5.43	6.39	4.12	3.78	4.95	5.67	5.64	4.48	143	175	168	131	145	217	208	183	157	225	103	128	104	105	79	134	113	112	103	75	67	81	125	123
LOC105222570	75.88	86.77	84.08	79.18	84.08	83.49	71.48	92.63	80.44	96.23	66.83	64.65	69.87	65.92	58.01	58.48	64.98	66.37	69.05	57.34	59.74	66.53	61.86	60.46	63.49	2584	2497	2865	2357	2447	2242	2584	2231	2189	2990	1729	2019	1637	1351	1367	1436	2046	2012	1635	1532	1557	1600	2004	1937
LOC105222571	14.74	13.56	12.4	12.16	12.71	10.68	14.8	10.98	10.26	12.17	13.67	14.38	13.37	12.9	14.09	20.21	18.59	19.54	19.87	23.36	22.47	23.89	21.51	20.72	23.26	1845	1434	1554	1334	1366	1054	1973	974	1025	1389	1297	1649	1149	970	1224	1829	2155	2181	1731	2298	2156	2110	2554	2437
LOC105222572	1.45	0.93	1.2	1.39	1.29	0.25	0.17	0.07	0.1	0.05	0.06	0.04	0.05	0	0.02	0	0	0.06	0.05	0.06	0.13	0	0	0.03	0	88	48	73	74	67	12	11	3	5	3	3	2	2	0	1	0	0	3	2	3	6	0	0	2
LOC105222573	9.58	8.97	7.32	8.31	7.65	4.27	5.56	4.95	7.11	9.42	8.22	8.18	5.58	7.83	10.64	11.27	3.63	10.78	8.3	13.65	19.59	21.62	13.21	13.29	17.6	345	270	261	258	235	121	211	127	205	307	222	268	133	169	265	292	118	343	208	383	540	540	443	435
LOC105222574	0	0	0	0	0	0	0	0	0	0	0	0	0	0	0	0	0	0	0	0	0	0	0.1	0	0	0	0	0	0	0	0	0	0	0	0	0	0	0	0	0	0	0	0	0	0	0	0	1	0
LOC105222575	1.45	0.86	0.84	1.05	0.71	1.24	1.25	0.78	0.79	0.77	0.99	1.12	0.81	0.61	1.22	1.16	2.35	1.22	1.34	2.29	1.3	1.57	1.18	1.16	1.38	154	77	89	98	65	104	141	59	67	76	80	109	59	39	91	90	231	116	99	194	106	118	120	118
LOC105222576	0.05	0.11	0.03	0.1	0.11	0.03	0.05	0.05	0.05	0.07	0.05	0.03	0.07	0.13	0.04	0.05	0.03	0.01	0	0.1	0.07	0.16	0.07	0.1	0.1	4	7	2	7	7	2	4	3	3	5	3	2	4	6	2	3	2	1	0	6	4	9	5	7
LOC105222577	4.94	4.3	4.01	3.92	4.2	4.13	5.27	3.82	4.32	4.32	3.28	3.82	2.7	2.92	3.19	7	5.76	6.32	6.01	7.2	7.99	8.08	6.91	8.2	8.12	565	415	459	392	410	372	639	309	395	451	285	400	212	201	252	577	609	643	478	646	699	652	751	882
LOC105222579	9.86	10.26	8.16	8.54	10.55	23.58	20.53	21.07	20.32	17.01	20.09	15.07	19.12	16.49	17.44	14.71	16.2	15.45	18.12	15.26	11.79	14.44	14.64	11.32	11.81	194.53	171.06	161.12	147.23	177.92	366.83	429.86	294.05	320.36	306.11	301.17	272.57	259.47	195.77	238.13	209.3	295.52	271.39	248.58	236.11	178.01	201.16	274.71	210.12
LOC105222581	0	0.11	0.09	0	0	0	0.09	0	0	0	0	0.2	0	0	0	0	0	0	0	0	0	0	0	0	0.12	0	1	1	0	0	0	1	0	0	0	0	2	0	0	0	0	0	0	0	0	0	0	0	0
LOC105222582	1.01	0.85	0.89	1.32	1.48	0.47	0.35	0.57	0.58	0.44	0.57	0.25	0.71	0	0.33	0.36	0.22	0.39	0.46	0.37	0.15	0.45	0.51	0.28	0.25	35	25	31	40	44	13	13	14	16	14	15	8	17	0	8	9	7	12	11	10	4	11	17	9
LOC105222583	4.53	5.17	4.27	5.03	3.85	4.97	3.5	2.5	4.85	4.41	4.56	5.06	3.11	3.22	3.53	1.9	2.15	1.12	1.48	1.11	0.91	0.8	0.92	0.48	0.99	208	185	177	182	142	216	198	98	210	226	186	255	109	116	126	67	99	54	62	48	40	33	50	31
LOC105222584	0.06	0	0	0.56	0.07	0	0.06	0	0	0	0.08	0.07	0.27	0	0.18	0.17	0.07	0	0.26	0.31	0	0	0	0.13	0.08	1	0	0	8	1	0	1	0	0	0	1	1	3	0	2	2	1	0	3	4	0	0	0	2
LOC105222585	0	0	0.12	0.07	0	0	0.06	0	0	0	0.08	0	0.09	0	0	0	0	0	0	0	0	0	0	0	0	0	0	2	1	0	0	1	0	0	0	1	0	1	0	0	0	0	0	0	0	0	0	0	0
LOC105222586	0	0	0	0	0	0	0	0	0	0	0	0	0	0	0	0	0	0	0	0	0	0	0	0	0.06	0	0	0	0	0	0	0	0	0	0	0	0	0	0	0	0	0	0	0	0	0	0	0	0
LOC105222587	17.22	17.27	15.6	17.61	15.64	32.88	29.65	27.61	32.57	33.54	28.84	25.78	25.64	30.4	28.45	26.7	27.54	28.39	24.74	26.89	24.13	25.02	26.43	25.52	25.55	1076	912	975	962	835	1620	1967	1220	1626	1912	1369	1477	1102	1143	1230	1203	1591	1579	1075	1318	1154	1104	1571	1500
LOC105222588	0.03	0.07	0.06	0	0.07	0	0.05	0.04	0	0	0	0	0	0.05	0	0	0.09	0.07	0	0.04	0.04	0	0	0.18	0.07	1	2	2	0	2	0	2	1	0	0	0	0	0	1	0	0	3	2	0	1	1	0	0	6
LOC105222589	0	0	0	0	0	0	0	0	0	0	0	0	0	0	0	0	0	0	0	0	0	0	0	0	0	0	0	0	0	0	0	0	0	0	0	0	0	0	0	0	0	0	0	0	0	0	0	0	0
LOC105222590	0.89	1.01	0.63	2.12	0.96	4.66	0.66	0.42	0.33	1.42	1.56	0	0	0	0	0	0.12	0.13	0.53	0.05	1.41	0.11	0.39	0	0.23	24	23	17	50	22	99	19	8	7	35	32	0	0	0	0	0	3	3	10	1	29	2	10	0
LOC105222591	35.69	38.34	36.77	35.84	37.55	39.7	37.79	40.25	41.04	40.53	31.02	32.1	32.75	32.82	31.45	27.17	29.35	30.11	27.48	29.43	28.36	26.41	31.49	27.44	33.18	1761	1581	1830	1554	1587	1550	1997	1417	1629	1865	1163	1460	1133	972	1077	982	1337	1337	961	1155	1072	934	1468	1291
LOC105222592	0	0.08	0.07	0	0.08	0	0.07	0.2	0	0	0	0.3	0.2	0.12	0	0	0	0	0	0	0	0.1	0	0	0	0	1	1	0	1	0	1	2	0	0	0	4	2	1	0	0	0	0	0	0	0	1	0	0
LOC105222593	19.57	18.48	17.5	21.12	18.86	7.09	7.37	8.23	6.68	7.89	7.4	7.69	6.9	8.48	6.29	8.1	7.45	8.04	8.7	8.12	8.77	7.81	9.46	9.6	9.26	1096	875	981	1034	903	313	438	326	299	403	315	395	266	286	244	327	386	401	339	357	376	309	504	506
LOC105222594	0.69	0.41	0.62	0.43	0.95	2.42	1.21	1.59	3.13	1.58	2.84	2.52	2.36	2.44	3.12	3.73	2.91	3.51	2.43	3.63	3.35	3.28	3.29	6.88	4.9	22	11	20	12	26	61	41	36	80	46	69	74	52	47	69	86	86	100	54	91	82	74	100	207
LOC105222595	8.72	6.79	5.58	6.91	7.7	11.64	14.56	10.38	11.11	11.24	12.89	13.77	11.68	12.71	18.91	13.69	14.31	11	9.79	14.92	13.6	15.28	13.67	15.13	13.84	114	75	73	79	86	120	202	96	116	134	128	165	105	100	171	129	173	128	89	153	136	141	170	186
LOC105222596	5.92	5.92	6.75	6.53	7.74	6.25	6.19	5.02	6.07	5.58	7.49	7.05	6.71	7.19	6.8	11.2	8.98	9.21	9.48	9.46	8.92	9.25	9.88	9.98	11.76	244.33	206.38	278.7	235.75	272.91	203.3	271.23	146.43	200.05	210.13	234.93	266.95	190.4	178.5	194.28	333.26	342.83	338.44	272.1	306.47	281.74	269.69	388.01	387.47
LOC105222597	0	0.06	0.05	0.09	0.18	0.36	0.2	0.22	0.1	0.31	0.17	0.2	0.3	0.35	0.08	0.61	0.31	0.23	0.37	0.1	0.31	0.44	0.49	0.69	0.4	0	2	2	3	6	11	8	6	3	11	5	7	8	8	2	17	11	8	10	3	9	12	18	25
LOC105222598	4.48	3.98	2.93	4.12	4.56	1114.34	1321.89	1162.9	990.37	967.68	4942.82	4353.62	6097.4	4397.3	4503.76	5439.72	6318.21	5885.63	5680.33	4791.44	4099.46	4481.43	5622.76	4793.12	5443.15	79.97	60	52.34	64.22	69.45	15670.5	25025.7	14667.8	14113	15746.1	66968.6	71198.9	74806	47190.9	55581.5	69948.6	104186	93434.2	70436.9	67038.7	55949.5	56437.4	95396.2	80418.2
LOC105222599	0.08	0	0.25	0	0.29	1.36	1.01	1.4	0.83	0.18	4.45	0.54	4.07	2.47	5.72	1.26	2.94	2.5	4.62	1.79	3.23	3.5	2.95	3.07	2.5	1	0	3	0	3	13	13	12	8	2	41	6	34	18	48	11	33	27	39	17	30	30	34	35
LOC105222601	0.04	0	0	0.14	0.05	0.2	0	0	0	0.09	0.05	0	0	0.07	0.11	0.16	0.04	0.04	0.11	0.1	0.26	0	0.12	0.21	0.1	1	0	0	3	1	4	0	0	0	2	1	0	0	1	2	3	1	1	2	2	5	0	3	5
LOC105222603	260.76	244.89	215.32	210.35	205.03	138.03	107.62	131.22	127.54	123.5	253.04	249.05	263.04	207.57	240.99	261.14	285.36	247.01	252.17	224.3	244.48	222.07	312.17	300.29	234.38	6440.03	5111	5320.66	4541	4327.55	2688	2821.6	2292	2516.89	2783	4747.74	5640.46	4469.05	3084.87	4118.72	4650.3	6516.62	5430.41	4330.44	4346	4620.72	3873.02	7334.65	6977.32
LOC105222604	4.56	5.11	3.6	2.06	2.55	22.25	17.68	16.45	19.28	15.51	72.3	67.61	100.21	66.63	71.56	52.5	61.83	54.1	63.44	52.93	50.93	52.73	68.14	61.63	64.02	134	127	106	53	64	516	552	342	453	416	1615	1823	2027	1179	1456	1113.1	1681	1416	1297	1221	1146	1095	1906	1705
LOC105222605	0.06	0	0	0	0	0	0.12	0.18	0.08	0	0	0.34	0.09	0	0	0	0	0	0	0.08	0	0	0	0	0	1	0	0	0	0	0	2	2	1	0	0	5	1	0	0	0	0	0	0	1	0	0	0	0
LOC105222606	0	0	0	0	0	0.32	0	0	0	0	0	0	0	0	0	0	0	0	0	0	0	0	0	0	0	0	0	0	0	0	3	0	0	0	0	0	0	0	0	0	0	0	0	0	0	0	0	0	0
LOC105222607	40.29	35.59	36.94	35.14	36.53	17.38	27.32	17.35	18.2	21.05	24.85	27.72	19.24	21.12	24.59	36.57	33.11	36.2	35.38	41.25	43.52	44.73	40.23	42.32	42.9	4282	3197	3928	3265	3318	1457	3083	1304	1546	2041	2007	2702	1407	1351	1809	2803	3254	3425	2615	3440	3540	3357	4068	4232
LOC105222608	0.28	0.11	0.46	0.32	0.43	0.12	0.09	0	0.12	0.1	0	0	0	0	0	0	0	0	0	0	0	0.13	0.1	0	0	3	1	5	3	4	1	1	0	1	1	0	0	0	0	0	0	0	0	0	0	0	1	1	0
LOC105222609	0	0	0	0	0	0	0	0	0	0	0	0	0	0	0	0	0	0.26	0	0	0.2	0	0	0.08	0	0	0	0	0	0	0	0	0	0	0	0	0	0	0	0	0	0	3	0	0	2	0	0	1
LOC105222610	0	0	0	0	0	0	0.16	0	0	0	0.11	0	0	0	0	0	0	0	0	0	0	0	0	0	0	0	0	0	0	0	0	2	0	0	0	1	0	0	0	0	0	0	0	0	0	0	0	0	0
LOC105222611	0	0	0	0	0	0	0	0	0	0.07	0	0	0	0	0	0	0	0	0	0	0	0	0	0	0	0	0	0	0	0	0	0	0	0	1	0	0	0	0	0	0	0	0	0	0	0	0	0	0
LOC105222612	42.4	42.23	40.24	34.74	40.08	28.03	44.23	29.03	29.91	31.15	64.88	56.5	45.59	45.52	53.55	119.2	106.13	89.94	113.58	103.72	115.9	116.65	103.51	128.89	142.85	1483	1248	1408	1062	1198	773	1642	718	836	994	1724	1812	1097	958	1296	3006	3432	2800	2762	2846	3102	2881	3444	4241
LOC105222613	59.35	54.95	55.19	53.74	61.91	37.5	34.11	31.78	29.78	33.58	34.36	33.87	39.51	30.91	30.22	35.69	37.91	38.73	39.44	42.21	33.79	32.06	35.2	33.19	35.9	1439	1126	1339	1139	1283	717	878	545	577	743	633	753	659	451	507	624	850	836	665	803	627	549	812	757
LOC105222614	10.8	9.45	11.28	10.3	10.84	11.29	11.3	10.92	9.67	9.98	8.92	10.06	8.02	8.86	9.58	11.78	11.49	11.74	11.71	13.49	10.93	11.51	12.72	11.57	11.96	2246	1661	2346	1872	1926	1851	2494	1606	1607	1894	1409	1919	1147	1109	1378	1766	2210	2173	1693	2201	1740	1690	2516	2263
LOC105222617	0	0	0	0	0	0	0	0	0	0	0	0	0	0	0	0	0	0	0	0	0	0	0	0	0	0	0	0	0	0	0	0	0	0	0	0	0	0	0	0	0	0	0	0	0	0	0	0	0
LOC105222618	98.27	109.64	108.67	107.48	99.36	50.36	58.62	52.49	53.97	55.37	72.47	71.2	60.43	65.99	66.32	80.43	80.2	83.6	85.95	89.01	85.49	95.46	77.9	88.15	87.97	2274	2144	2516	2174	1965	919	1440	859	998	1169	1274	1511	962	919	1062	1342	1716	1722	1383	1616	1514	1560	1715	1919
LOC105222619	0.2	0	0.05	0	0.06	0	0	0	0	0	0	0	0	0	0	0	0	0	0	0	0	0	0	0	0	4	0	1	0	1	0	0	0	0	0	0	0	0	0	0	0	0	0	0	0	0	0	0	0
LOC105222620	0	0	0	0	0	0	0	0	0	0	0	0	0	0	0	0	0	0	0	0	0	0	0	0	0	0	0	0	0	0	0	0	0	0	0	0	0	0	0	0	0	0	0	0	0	0	0	0	0
LOC105222621	0	0	0	0	0	0	0	0	0	0	0	0	0	0	0	0	0	0	0	0	0	0	0	0	0	0	0	0	0	0	0	0	0	0	0	0	0	0	0	0	0	0	0	0	0	0	0	0	0
LOC105222622	0	0	0	0.13	0.13	0.07	0	0	0.28	0	0.07	0	0	0	0	0.08	0	0	0	0.07	0.07	0	0	0.06	0	0	0	0	2	2	1	0	0	4	0	1	0	0	0	0	1	0	0	0	1	1	0	0	1
LOC105222623	0	0	0	0	0	0	0	0	0	0	0	0	0	0	0	0	0	0	0	0	0	0	0	0	0	0	0	0	0	0	0	0	0	0	0	0	0	0	0	0	0	0	0	0	0	0	0	0	0
LOC105222624	0	0	0	0	0	0.12	0	0	0	0.26	0.06	0.05	0	0	0	0	0	0	0	0.24	0	0	0	0.2	0.06	0	0	0	0	0	2	0	0	0	5	1	1	0	0	0	0	0	0	0	4	0	0	0	4
LOC105222625	12.13	13.26	13.21	11.76	11.3	11.08	10.34	12.35	11.51	13.55	10.27	13.06	15.17	11.56	13.29	13.4	15.96	12.07	15.01	19.31	13.33	13.02	13.73	15.53	16.82	157	145	171	133	125	113	142	113	119	160	101	155	135	90	119	125	191	139	135	196	132	119	169	189
LOC105222626	0.68	0.13	0.11	1.04	0	0.14	0	0	0	0.12	0.15	0	0	0	0	0.16	0	0.13	0	0	0.15	0	0	0.24	0.29	6	1	1	8	0	1	0	0	0	1	1	0	0	0	0	1	0	1	0	0	1	0	0	2
LOC105222627	0	0	0	0	0	0	0.05	0	0	0	0	0	0	0	0	0	0	0	0	0	0	0	0	0	0	0	0	0	0	0	0	1	0	0	0	0	0	0	0	0	0	0	0	0	0	0	0	0	0
LOC105222628	0	0	0	0	0	0	0	0	0	0	0	0	0	0	0	0	0	0	0	0	0	0	0	0	0	0	0	0	0	0	0	0	0	0	0	0	0	0	0	0	0	0	0	0	0	0	0	0	0
LOC105222629	0	0	0	0.09	0	0	0	0	0	0	0	0	0	0	0	0	0	0	0	0	0	0	0	0	0	0	0	0	1	0	0	0	0	0	0	0	0	0	0	0	0	0	0	0	0	0	0	0	0
LOC105222630	0	0	0	0	0	0	0	0	0	0	0	0	0	0	0	0	0	0	0	0	0	0	0	0	0	0	0	0	0	0	0	0	0	0	0	0	0	0	0	0	0	0	0	0	0	0	0	0	0
LOC105222631	6.34	4.22	6.13	7.71	4.88	9.68	9.78	7.93	9.02	8.62	6.69	7.35	7.28	6.97	6.36	8.07	9.75	5.6	8.82	7.49	3.43	3.49	3.03	3.48	2.59	242	136	234	257	159	291	396	214	275	300	194	257	191	160	168	222	344	190	234	224	100	94	110	125
LOC105222632	0.02	0	0	0	0	0	0	0	0	0	0	0	0	0	0	0	0.02	0.02	0	0	0	0	0.02	0	0	1	0	0	0	0	0	0	0	0	0	0	0	0	0	0	0	1	1	0	0	0	0	1	0
LOC105222633	0.13	0	0	0.22	0	3.76	4.75	4.05	8.96	9.92	7.67	7.77	5.16	11.09	17.5	8.71	1.41	8.7	4.87	15.52	17.74	12.86	11.43	11.21	10.17	4	0	0	6	0	91	155	88	220	278	179	219	109	205	372	193	40	238	104	374	417	279	334	324
LOC105222634	1.91	2.86	2.27	1.7	1.88	45.3	57.93	41.83	21.81	39.96	108.2	86.44	82.66	70.19	86.31	88.57	89.03	77.38	76.77	57.04	72.46	71.06	89.61	89.27	74.65	86	109	102	67	72	1610	2770	1332	785	1642	3700	3570	2561	1903	2692	2877	3708	3102	2405	2016	2498	2262	3838	3781
LOC105222635	0	0	0	0	0	0	0	0	0	0	0	0	0	0	0	0	0	0	0	0	0	0	0	0	0.04	0	0	0	0	0	0	0	0	0	0	0	0	0	0	0	0	0	0	0	0	0	0	0	0
LOC105222636	0.75	0.61	0.52	0.75	0.79	1.82	6.14	4.15	2.84	2.44	9.46	10.78	7.17	5.44	9.52	13.37	15.23	9.9	15.65	13.3	16.41	15.44	19.11	18.79	17.11	65	45	45	57	59	125	568	256	198	194	626	861	430	285	574	840	1227	768	948	909	1094	950	1584	1540
LOC105222637	0	0	0	0	0	0	0	0.04	0.07	0	0	0.03	0.15	0	0.04	0	0.03	0	0.08	0.06	0	0.09	0	0	0.07	0	0	0	0	0	0	0	1.11	2.33	0	0	1.05	4.46	0	1.11	0	1.14	0	2.47	2.22	0	2.85	0	0
LOC105222638	8.73	8.15	8.86	10.31	10.87	6.16	6.88	5.31	5.45	5.28	7.6	8.9	6.39	6.87	7.93	9.35	10.75	11.07	8.96	10.68	10.43	9.76	10.09	10.33	9.69	377	291	374	376	386	214	322	164.89	186.67	212	241	344.95	183.54	176	241.89	294	428.86	414	265.53	358.78	340	292.15	399	406
LOC105222639	4.05	2.98	2.8	2.71	3.55	4.18	3.84	4.9	3.87	4.78	3.27	3.97	4.03	4.37	3.09	3.49	2.69	2.66	2.29	4.35	2.53	3.11	2.61	2.92	2.89	140	87	97	82	105	114	141	120	107	151	86	126	96	91	74	87	86	82	55	118	67	76	86	95
LOC105222640	20.3	16.75	16.99	19.19	18.23	25.31	26.46	27.41	23.98	25.73	26.79	35.21	27.93	30.14	31.88	31.46	34	30.34	29.52	32.54	24.89	33.09	31.01	35.89	29.06	357	249	299	295	274	351	494	341	337	413	358	568	338	319	388	399	553	475	361	449	335	411	519	594
LOC105222641	3.39	3.41	3.17	3.67	2.96	4.93	4.63	3.65	4.04	4.46	4.75	4.2	5.41	4.87	4.69	4.81	5.55	5.19	5.27	5.58	4.93	5.09	4.84	5.18	5.4	185	157	173	175	138	212	268	141	176	222	197	210	203	160	177	189	280	252	200	239	206	196	251	266
LOC105222642	18.66	19.7	20.07	20.31	20.13	23.67	20.19	20.12	19.64	18.48	21.89	22.5	24.83	23.8	21.82	22.49	24.9	26.78	25.5	24.81	26.6	25.44	22.31	24.18	22.58	891	790	949	849	798	867	1012	676	745	806	790	987	810	678	721	770	1100	1122	847	930	969	855	1018	1088
LOC105222643	48.67	43.01	59.42	56.24	45.25	3.03	2.14	5.29	3.61	3.22	3.23	1.67	1.87	2.95	2.48	0.68	2.32	0.48	1.67	1.17	0.72	0.69	1.74	0.52	1.63	794	593	970	802	631	39	37	61	47	48	40	25	21	29	28	8	35	7	19	15	9	8	27	8
LOC105222644	0.63	0.49	0.97	0.72	0.61	1.06	0.66	0.93	1	0.88	0.05	0.38	0.3	0.17	0.05	0.24	0.08	0.12	0.1	0.04	0.18	0.2	0.26	0.18	0.04	18	12	28	18	15	24	20	19	23	23	1	10	6	3	1	5	2	3	2	1	4	4	7	5
LOC105222645	8.91	8.89	8.89	8.96	7.81	5.05	5.79	6.06	6.47	6.31	4.36	4.75	3.45	4.4	4.12	4.23	3.98	3.82	4.31	4.32	4.42	3.7	3.42	4.33	3.45	785	667	790	688	590	343	533	381	459	500	294	387	203	231	249	271	327	302	266	284	297	232	286	362
LOC105222646	0.31	0.32	0.13	0.26	0.42	0.06	0.17	0.16	0.17	0.2	0.09	0.07	0.13	0.04	0.06	0.06	0.05	0.1	0.06	0	0.03	0.1	0.16	0.02	0.14	14	12	6	10	16	2	8	5	6	8	3	3	4	1	2	2	2	4	2	0	1	3	7	1
LOC105222647	0.54	0.41	0.7	0.69	0.62	0.44	0.44	0.62	0.5	0.34	0.58	0.38	0.67	0.64	0.51	0.45	0.51	0.51	0.52	0.51	0.6	0.47	0.53	0.64	0.81	46	23	50	49	35	25	32	32	32	24	29	36	41	30	27	25	34	34	24	33	33	24	37	41
LOC105222649	0.13	0.11	0.21	0.19	0.03	0.26	0.35	0.29	0.08	0.23	0.2	0.17	0.28	0.36	0.17	0.25	0.29	0.22	0.26	0.34	0.24	0.31	0.27	0.23	0.37	10	7	16	13	2	16	29	16	5	16	12	12	15	17	9	14	21	15	14	21	14	17	20	17
LOC105222650	33.31	34.93	32.4	46.01	37.29	105.12	143.91	104.79	92.46	80.54	93.02	82.85	81.04	75.23	77.26	114.47	135.07	127.72	108.35	109.34	118.95	117.46	127.3	136.65	124.26	2313	2039	2200	2787	2201	5601	10339	5018	5001	4952	4697	5080	3703	3037	3587	5491	8300	7522	5026	5665	6027	5474	7926	8477
LOC105222651	6.56	7.43	6.01	6.09	6.56	4.49	5.5	4.38	4.69	4.08	5.4	5.21	6.04	4.98	5.04	5.98	7.93	6.73	6.91	6.75	5.84	6.91	6.84	6.7	7.32	254	243	233	206	217	137	226	120	145	144	159	185	161	116	135	167	284	232	186	205	173	189	252	244
LOC105222652	20.27	18.65	18.2	16.61	18.55	11.49	16.59	10.84	12.59	12.88	17.42	19.19	15.41	14.93	18.19	23.06	23.06	24.94	23.01	26.69	28.09	29.25	30.81	29.85	29.99	1092	849	981	782	854	488	949	413	542	633	713	948	571	484	678	896	1149	1196	862	1128	1158	1113	1579	1513
LOC105222653	0.01	0	0.01	0	0	0	0.02	0	0	0.01	0	0	0	0	0.03	0	0	0.02	0	0	0	0	0.02	0.04	0	1	0	1	0	0	0	1	0	0	1	0	0	0	0	1	0	0	1	0	0	0	0	1	2
LOC105222655	2.29	4.45	3.3	5.54	2.57	0.4	0.17	0.54	0.17	0.41	0.12	0.27	0.32	0.26	0.65	0.22	0.22	0.12	0	0.39	0.06	0.19	0.3	0.28	0.22	121	197	179	256	118	17	8	19	7	20	4	12	11	7	23	8	9	5	0	16	2	6	13	13
LOC105222657	3.75	1	0.85	2.21	0.85	2.91	1.71	1.37	3.03	3.58	2.71	1.58	0.35	0.6	1.05	0.84	0.92	0.95	0.7	1.08	0.47	1.71	1.02	1.16	2.45	31	7	7	16	6	19	15	8	20	27	17	12	2	3	6	5	7	7	4	7	3	10	8	9
LOC105222658	12.32	12.13	13.91	12.19	14.24	12.45	10.86	10.46	11.09	12.32	10.69	10.43	11.96	10.65	10.6	10.92	11.12	11.68	11.02	12.68	9.92	11.06	9.35	10.69	10.63	937	805	1067	817.69	938	733	881	558	695	861	619	723	616	511	569	617	782	785	603	761	591	604	665	766
LOC105222660	89.48	99.17	98.83	91.84	92.17	87.88	87.71	92.42	88.91	95.86	86.85	88.1	97.45	93.11	87.64	96.96	90.11	90.84	92.63	92.17	103.02	101.86	99.59	105.58	106.59	2616	2450	2891	2347	2303	2026	2722	1911	2077	2557	1929	2362	1960	1638	1773	2044	2436	2364	1883	2114	2305	2103	2770	2904
LOC105222661	26.6	23.6	21.44	22.52	22.82	9.89	12	9.08	11.52	11.55	12.41	13.51	9.96	13.49	12.41	14.06	13.82	14.84	14	15.8	17.42	17.11	15.2	15.84	14.61	1356	1031	1109	1018	983	416	670	343	492	553	483	659	366	431	445	525	663	679	498	640	699	634	748	774
LOC105222662	0.02	0	0	0	0	0	0	0	0	0	0.03	0	0.03	0	0	0	0	0.05	0	0	0.06	0	0	0	0	1	0	0	0	0	0	0	0	0	0	1	0	1	0	0	0	0	2	0	0	2	0	0	0
LOC105222663	3.93	4.37	3.52	2.98	4.2	6.05	5.4	5.58	5.04	6.01	5.62	6.11	5.68	4.93	5.64	5.48	6.08	5.88	5.84	6.08	6.46	7.18	7.67	6.05	6.36	210	198	189	140	192	256	307	211	215	294	228	300	209	159	208	211	300	279	218	256	264	271	391	305
LOC105222664	11.59	10.78	11.71	9.96	11.09	5.74	7.83	5.58	6.64	7.02	8.87	10.11	7.88	9.98	9.7	12.17	12.08	13.68	13.67	13.94	16.71	14.59	16.46	17.01	16.39	494	388	499	371	404	193	354	168	226	273	287	395	231	256	286	374	476	519	405	466	545	439	667	682
LOC105222665	11.1	10.35	10.13	10.19	11.37	5.98	7.92	5.7	5.7	6.74	5.59	6.8	4.96	4.97	5.54	9.34	10.67	9.28	10.66	12.03	11.71	10.78	9.25	10.55	11.21	1239	1013	1165	1028	1126	535	948	469	532	693	486	727	397	352	453	767	1056	938	837	1075	1040	882	969	1128
LOC105222666	1.78	1.16	1.49	1.2	1.2	1.33	2.07	1.55	1.31	1.5	2.67	2.4	1.7	0.97	2.93	4.03	3.2	3.98	4.14	4.86	6.29	5.77	6.03	4.72	5.65	73	40	61	43	42	43	90	45	43	56	83	90	48	24	83	119	121	145	118	156	197	167	235	182
LOC105222667	58.35	55.83	56.56	55.29	55.99	66.44	77.86	61.45	66.06	64.23	81.61	85.3	76.43	87.59	82.44	101.61	96.88	98.22	98.65	113.18	114.78	112.85	103.3	106.88	111.97	3393	2743	3288	2808	2780	3041	4798	2522	3065	3400	3596	4541	3052	3060	3309	4251	5202	5079	3981	5153	5097	4623	5702	5833
LOC105222668	0	0	0	0.04	0	0.04	0	0	0	0	0	0.03	0	0	0	0	0	0	0	0	0	0	0	0	0	0	0	0	1	0	1	0	0	0	0	0	1	0	0	0	0	0	0	0	0	0	0	0	0
LOC105222669	0	0	0.03	0.09	0	0.04	0.03	0	0	0	0	0	0	0	0	0	0	0	0	0.04	0.13	0	0	0.04	0	0	0	1	2.31	0	1	1	0	0	0	0	0	0	0	0	0	0	0	0	1	3	0	0	1
LOC105222670	0	0.04	0	0.03	0	0	0	0	0	0	0	0	0	0	0	0.04	0	0	0	0	0	0.04	0	0	0	0	1	0	1	0	0	0	0	0	0	0	0	0	0	0	1	0	0	0	0	0	1	0	0
LOC105222672	14.31	17.32	17.11	14.47	14.77	108.11	117.6	109.7	111.91	102.75	75.5	74.95	82.79	70.86	66.74	53.46	68.85	60.15	66.69	58.48	53.04	49.11	66.03	57.03	54.19	525	537	628	464	463	3127	4579	2846	3280	3439	2104	2521	2089	1564	1694	1414	2335	1964	1701	1683	1489	1272	2304	1968
LOC105222673	0.72	0.58	0.56	0.86	0.55	0.77	0.62	1.12	0.64	0.74	1.05	0.94	0.85	0.66	0.78	1.72	0.94	0.92	1.01	0.95	1.1	1.22	1.25	1.39	1.39	31	21	24	32	20	26	28	34	22	29	34	37	25	17	23	53	37	35	30	32	36	37	51	56
LOC105222674	0	0	0	0	0	0	0	0	0	0	0	0	0	0	0	0	0	0	0	0	0	0	0	0	0	0	0	0	0	0	0	0	0	0	0	0	0	0	0	0	0	0	0	0	0	0	0	0	0
LOC105222675	110.19	107.02	100.34	117.4	105.52	77.17	70.65	68.78	74.79	77.8	71.25	66.16	66.95	73.02	64.2	67.79	66.9	67.75	64.42	61.51	63.36	63.58	71.63	67.07	66.16	4261	3497	3882	3968	3487	2353	2900	1881	2311	2745	2093	2346	1781	1699	1718	1890	2392	2332	1732	1866	1875	1736	2635	2440
LOC105222676	120.94	128.6	124.97	127.47	129.62	94.28	93.05	96.69	91.54	91.1	93.43	97.89	92.05	98.82	106.69	117.76	107.61	109.53	113.62	121.71	128.06	128.86	105.27	122.08	115.63	8118	7285	8389	7501	7447	4985	6625	4564	4907	5558	4757	6007	4232	3981	4948	5684	6674	6545	5293	6393	6559	6089	6729	7700
LOC105222677	3.79	4.07	4	3.4	3.75	5.64	6.02	4.53	4.71	4.98	5.98	6.46	6.84	8.09	6.15	6.91	5.95	8.04	6.6	8.29	8.13	9.18	7.11	7.96	7.16	162	147	171	127	137	190	273	137	161	194	194	253	201	208	182	213	235	306	196	278	266	277	289	320
LOC105222678	0.13	0.05	0.17	0.07	0.14	0.27	0.25	0.26	0.35	0.11	0.58	0.44	0.36	0.35	0.59	0.4	0.38	0.63	0.3	0.66	0.53	0.44	0.4	0.5	0.34	7	2	9	3	6	11	14	9	14	5	23	21	13	11	20	15	18	29	11	27	21	16	19	24
LOC105222679	3.07	2.48	3.18	2.47	2.4	4.51	7.72	4.1	4.49	4.1	8.03	7.43	5.37	5.37	6.43	13.23	13.24	11.15	13.14	15.75	15.58	17.02	18.2	15.84	17.13	192	131	199	135	128	222	512	181	224	234	381	426	231	202	278	596	765	620	571	772	745	751	1082	931
LOC105222680	28.33	27.62	27.82	28.26	28.62	25.13	24.32	21.66	25.19	25.02	27.92	27.07	28.09	30.46	28	30.03	27.45	31.23	32.67	35.06	35.3	36.15	33.72	35.19	35.87	1544	1272	1517	1346	1333	1080	1407	835	1097	1244	1156	1353	1053	999	1056	1180	1383	1515	1238	1499	1472	1391	1748	1804
LOC105222681	19.76	20.35	18.67	20.69	20.73	41.02	44.78	42.69	47.96	56.04	48.24	47.78	49.23	56.09	51.52	44.65	42.69	46.68	45.93	54.62	49.25	54.85	47.7	50.64	50.97	532	463	503	487	477	871	1280	813	1032	1377	987	1180	912	909	960	867	1063	1119	860	1154	1015	1043	1222	1283
LOC105222682	28.14	27.88	24.56	25.45	23.15	16.39	19.51	16.6	20.63	17.39	17.76	19.37	17	17.17	20.39	17.01	19.59	18.32	17.58	18.38	20.11	20.48	19.69	20.89	20.97	640	536	559	506	450	294	471	267	375	361	307	404	266	235	321	279	412	371	278	328	350	329	426	447
LOC105222683	0.91	0.83	1.16	1.07	1.26	1.02	0.76	0.55	0.99	0.97	0.71	0.8	0.89	1.2	0.8	0.91	1.04	0.86	1	1.15	0.84	0.81	0.84	1.17	1.01	99	76	126	101	117	87	87	42	86	96	58	79	66	78	60	71	104	83	75	98	70	62	87	119
LOC105222684	0.08	0.05	0.13	0.24	0.1	0.04	0.03	0.16	0.04	0.02	0.02	0.03	0.06	0	0.04	0.02	0	0.02	0	0.09	0.02	0	0.04	0.03	0	6	3	9	15	6	2	2	8	2	1	1	2	3	0	2	1	0	1	0	5	1	0	3	2
LOC105222686	0	0	0	0	0	0	0	0	0	0	0	0	0	0	0	0	0	0	0	0.02	0.05	0	0	0	0	0	0	0	0	0	0	0	0	0	0	0	0	0	0	0	0	0	0	0	1	3	0	0	0
LOC105222688	0.02	0.02	0.02	0.02	0.04	0.01	0.01	0	0.03	0.04	0	0.01	0.01	0	0.02	0.03	0.02	0	0.01	0.01	0.01	0.04	0.04	0.03	0.03	3	3	3	2	5	1	2	0	3	5	0	2	1	0	2	3	3	0	1	1	1	4	5	4
LOC105222689	164.84	99.85	89.58	116.6	85.57	53.6	54.16	30.23	67.12	100.78	36.6	39.93	18.49	46.5	51.26	34.21	9.86	39.27	19.4	48.39	50.98	65.66	38.08	43.93	43.53	10238	5241	5567	6330	4542	2625	3571	1328	3331	5711	1727	2274	790	1738	2203	1532	566	2171	838	2358	2423	2880	2250	2567
LOC105222690	12.82	10.85	11.12	12.14	14.31	6.57	7.68	6.6	7.44	6.14	11.96	11.57	9.75	9.88	13.5	17.31	8.72	9.35	10.99	14.5	11.87	10.82	13.75	13.81	13.75	151	108	131	125	144	61	96	55	70	66	107	125	79	70	110	147	95	98	90	134	107	90	154	153
LOC105222691	1.1	0.63	0.29	1.5	0.33	0	0.23	0.12	0.05	0.09	0	0.13	0	0	0	0	0	0.09	0.24	0.05	0.11	0.06	0.09	0.13	0.16	27	13	7	32	7	0	6	2	1	2	0	3	0	0	0	0	0	2	4	1	2	1	2	3
LOC105222692	8.81	8.62	9.73	9.76	10.53	8.66	8.82	6.78	10.28	8.54	7.71	5.99	9.72	8.74	6.2	7.81	6.24	7.88	8.23	6.41	7.11	6.27	6.21	7.6	5.25	191	158	211	185	195	148	203	104	178	169	127	119	145	114	93	122	125	152	124	109	118	96	128	155
LOC105222693	6.07	5.85	6.67	5.9	7.66	4.51	5.76	3.68	4.77	4.51	4.39	6.19	4.98	3.67	4.89	6.37	6.24	4.63	5.86	6.91	4.93	5.16	7.43	5.16	7.24	140	114	154	119	151	82	141	60	88	95	77	131	79	51	78	106	133	95	94	125	87	84	163	112
LOC105222694	8.65	8.2	8.64	9.5	6.53	12.5	10.58	13.27	12.31	12.09	9.31	11.2	11.56	12.25	11.21	11.43	12.77	11.81	8.53	9.68	9.36	11.21	10.83	9.41	10.65	220	177	213	206	140	247	280	239	246	267	176	249	196	180	190	204	290	264	146	190	179	192	244	217
LOC105222695	16.66	14.28	11.61	13.86	12.97	2.04	2.6	1.69	2.27	2.78	3.71	3.32	2.69	2.53	3.96	5.14	3.65	5.09	5.1	5.51	7.11	5.86	5.98	7.38	5.94	809	586	564	588	538	78	134	58	88	123	137	148	90	74	133	180	164	220	172	210	264	201	276	337
LOC105222696	0.14	0.17	0.14	0.2	0.08	0.09	0.13	0.1	0.13	0.08	0.19	0.19	0.05	0.24	0.1	0.35	0.12	0.32	0.1	0	0.23	0.05	0.07	0.42	0.32	4	4	4	5	2	2	4	2	3	2	4	5	1	4	2	7	3	8	2	0	5	1	2	11
LOC105222697	3.8	3.81	3.78	4.6	4.19	7.29	6.89	4.89	6.04	5.29	5.93	5.47	5.67	4.21	5.81	7.71	5.93	6.98	6.69	4.75	4.49	6.01	7.76	6.92	7.62	156	132	155	165	147	236	300	142	198	198	185	206	160	104	165	228	225	255	191	153	141	174	303	267
LOC105222698	0	0	0	0.03	0.03	0	0.04	0	0	0.05	0	0	0	0	0.03	0	0	0	0	0	0.03	0	0.02	0	0	0	0	0	1	1	0	2	0	0	2	0	0	0	0	1	0	0	0	0	0	1	0	1	0
LOC105222699	0.49	0.18	0.53	0.1	0.23	0.08	0.02	0.16	0.08	0.02	0.12	0.12	0.1	0	0.1	0.03	0.1	0.07	0.13	0.06	0.03	0	0.05	0.17	0.17	22	7	24	4	9	3	1	5	3	1	4	5	3	0	3	1	4	3	4	2	1	0	2	7
LOC105222700	10.24	8.5	10.59	8.81	8.88	2.8	4.51	2.73	4.37	3.16	5.7	5.8	4.09	3.54	4.74	9.57	7.5	7.71	8.34	8.48	10.3	10.88	8.71	9.91	10.86	338.6	237.75	350.37	254.65	250.91	73.1	158.39	63.87	115.55	95.52	143.2	175.79	93.05	70.37	108.51	228.37	229.34	227.13	191.78	220.11	260.71	254.14	273.99	308.56
LOC105222701	0.94	0.94	1.06	0.96	0.87	0.42	0.18	0.25	0.3	0.24	0.07	0.06	0.11	0.02	0.05	0.09	0.04	0.11	0.11	0.11	0.11	0.12	0.08	0.09	0.11	87	74	99	77	68	30	17	16	22	20	5	5	7	1	3	6	3	9	7	8	8	8	7	8
LOC105222702	0	0	0	0	0	0	0.35	0	0.31	0	0	0	0	0	0	0	0	0	0	0	0	0	0.13	0.13	0	0	0	0	0	0	0	3	0	2	0	0	0	0	0	0	0	0	0	0	0	0	0	1	1
LOC105222703	0.03	0.04	0.06	0	0	0.04	0	0	0.19	0	0.04	0	0.04	0	0	0	0.1	0	0	0	0	0	0	0	0	1	1	2	0	0	1	0	0	5	0	1	0	1	0	0	0	3	0	0	0	0	0	0	0
LOC105222704	1.21	0.48	0.43	2.4	0.84	0.51	0.6	0	0.4	0.5	0.04	0.03	0	0.24	0	0	0.06	0.03	0.12	0	0.53	0.08	0.27	0.06	0.11	42	14	15	73	25	14	22	0	11	16	1	1	0	5	0	0	2	1	3	0	14	2	9	2
LOC105222705	1.17	0.39	1.66	1.12	1.68	7.48	2.95	0.78	0.45	5.97	1.37	0.04	0	0.22	0.09	0.05	0	0.18	1.17	0.12	1.24	0.09	1.06	0	0.04	36	10	51	30	44	181	96	17	11	167	32	1	0	4	2	1	0	5	25	3	29	2	31	0
LOC105222706	0.07	0.12	0.2	0.37	0.11	0.37	0.49	0.55	1.06	0.79	0.26	0.14	0.38	0.65	0.66	0.27	0.64	0.55	0.85	0.63	0.6	0.37	0.14	0.14	0.25	2	3	6	10	3	9	16	12	26	22	6	4	8	12	14	6	18	15	18	15	14	8	4	4
LOC105222707	0.05	0	0.03	0.11	0	0.19	0.07	0.07	0.09	0.11	0	0.03	0	0.17	0	0	0.08	0.06	0.04	0.03	0.29	0.04	0.24	0.13	0.19	2	0	1	4	0	6	3	2	3	4	0	1	0	4	0	0	3	2	1	1	9	1	9	5
LOC105222708	3.89	3.49	3.99	3.95	4.84	2.61	3.7	2.3	2.91	3.22	2.59	3.25	1.87	2.49	2.61	4.89	4.27	3.95	4.66	5.99	4.9	4.46	3.82	4.8	4.82	283.09	214.35	290.43	251.48	301.07	149.91	285.69	118.38	168.97	213.52	142.96	216.78	93.56	109.25	131.41	256.77	287.31	256.01	235.87	341.85	273.03	229.35	264.39	328.38
LOC105222709	4.26	3.93	4.03	4.93	4.42	9.96	8.74	8.87	10.24	9.77	12.23	10.87	11.33	10.54	12.22	12.63	13.18	11.9	10.85	13.34	13	16.48	17.51	16.09	13.92	280	222	278	281	245	529	616	430	552	592	626	656	526	425	558	611	811	709	505	687	658	773	1105	1008
LOC105222710	7.55	6.55	7.79	7.53	7.06	11.46	10.55	10.73	9.57	10.87	10.11	10.92	9.28	10.3	9.09	13.35	13.92	11.95	11.66	15.03	12.56	12.52	13.24	13.16	12.67	412	302	425	359	329	493	611	414	417	541	419	546	348	338	343	525	702	580	442	643	524	482	687	675
LOC105222711	38.4	41.26	38.42	42.67	38.37	45.91	41.19	52.85	48.79	48.18	47.65	44.22	44.77	44.47	45.24	41.95	45.64	41.24	46.55	42.1	40.55	41.06	45.26	45.35	43.23	980	890	981	952	837	924	1116	954	995	1122	924	1035	786	683	799	772	1077	937	826	843	792	740	1099	1089
LOC105222712	5.86	6.7	6.31	6.52	6.75	8.66	9.76	9.55	8.46	8.89	7.9	8.93	8.01	7.21	8.21	8.16	7.1	7.59	7.55	8.41	9.27	8.49	8.69	9.05	9.03	278.91	269.65	300.57	271.52	274.93	325.09	493.31	321.62	322.03	386.48	286.04	390.22	262.44	206.75	270.59	280.23	312.69	321.99	250.13	314.15	337.97	285.65	393.61	405.62
LOC105222713	12.38	10.12	8.78	9	11.11	4.56	8.08	5.04	5.14	5.69	6.83	8.73	4.98	5.98	6.08	11.24	11.63	13.22	12.29	12.71	13.7	14.51	16.62	16.15	18.15	365	252	259	232	280	106	253	105	121	153	153	236	101	106	124	239	317	347	252	294	309	302	466	448
LOC105222714	53.87	56.94	56.95	57.41	57.3	60.13	65.2	61.89	64.4	64.08	53	58.01	58.02	56.8	54.18	54.15	52.63	56.01	53.75	59.56	56.29	55.27	57.52	59.13	55.02	3148	2812	3330	2932	2863	2772	4046	2559	3008	3418	2355	3111	2334	1998	2192	2283	2846	2915	2185	2732	2519	2283	3200	3254
LOC105222715	0	0	0	0	0	0	0	0	0	0	0	0	0	0.08	0	0	0	0	0	0	0	0	0.05	0	0	0	0	0	0	0	0	0	0	0	0	0	0	0	1	0	0	0	0	0	0	0	0	1	0
LOC105222716	17.48	18.76	17.21	18.67	19.1	4.02	4.22	3.8	3.8	4.62	7.05	4.64	4.26	5.05	4.72	6.78	7.26	7.19	6.76	6.47	5.29	5.2	6.61	5.21	5.03	937	850	923	875	875	170	240	144	163	226	287	228	157	163	175	262	360	343	252	272	217	197	337	263
LOC105222717	12.46	14.47	14.44	13.62	13.39	11.9	11.33	12.34	8.59	9.71	16.83	14.19	12.88	12.99	14.17	14.37	14.57	13.26	15.66	14.75	14.23	13.8	15.95	13.03	14.27	381	374	442	364	350	287	368	267	210	271	391	398	271	239	300	317	412	361	333	354	333	298	464	375
LOC105222718	1.01	1.46	1.26	0.92	1.04	2.6	1.5	3.47	2.92	2.47	1.5	1.64	1.77	2.46	1.71	0.84	2.26	1.64	1.77	1.43	1.8	0.59	0	0.8	0.67	24.99	30.49	31.2	19.87	22.08	50.76	39.27	60.67	57.8	55.66	28.2	37.23	30.14	36.64	29.31	14.91	51.79	36.1	30.36	27.83	34.13	10.37	0	18.67
LOC105222719	2.89	1.87	1.83	2.04	2.12	1.17	1.76	1.2	1.13	1.39	2.11	2.66	2.44	1.66	2.23	3.87	3.6	3.84	3.45	2.98	4.04	4.62	4.04	3.48	3.77	151.01	82.51	95.8	93.13	94.92	48.24	97.73	44.33	47.2	66.34	83.8	127.77	87.86	52.36	80.69	146.09	174.21	178.9	125.64	122.17	161.87	170.63	201	171.33
LOC105222720	273.85	251.75	248.78	280.05	250.72	303.16	304.98	306.61	283.19	258.92	123.53	120.52	124.62	134.93	118.25	81.23	92.95	87.55	90.77	79.24	67.69	73.95	87.57	76.27	74.86	9864	7651	8948	8799	7691	8611	11638	7807	8140	8496	3368	3976	3082	2910	2938	2113	3093	2805	2271	2239	1860	1882	2993	2581
LOC105222722	0	0	0	0.06	0	1.33	0.05	0.15	0	0.23	1.04	0.11	0	1.22	0	0.07	0	1	1.44	0.2	12.92	0.89	5.25	0	0	0	0	0	1	0	20	1	2	0	4	15	2	0	14	0	1	0	17	19	3	188	12	95	0
LOC105222723	9.06	9.15	9.46	9.28	9.1	11.16	10.48	11.93	11.51	11.26	11.69	12.27	11.42	13.53	12.97	12.3	11.86	14.2	12.68	16.33	15.61	12.94	14.46	13.73	14.51	574	490	600	514	493	558	705	535	583	651	563	713	498	516	569	562	695	801	559	812	757	579	872	819
LOC105222724	5.1	4.94	5.12	4.84	4.56	5.22	4.52	6.03	5.09	5.65	5.49	5.76	5.46	5.01	4.97	5.64	4.61	5.04	5.27	5.92	5.37	5.72	6.7	6.17	5.82	341	280	342	283	260	275	321	285	271	346	280	356	253	204	236	271	285	300	248	312	274	269	423	386
LOC105222725	0.36	0	0.07	0	0	0.09	0	0.1	0.09	0.08	0.47	0.23	0	0	0	0.3	0.16	0.08	0	0	0.28	0.3	0	0.15	0.27	5	0	1	0	0	1	0	1	1	1	5	3	0	0	0	3	2	1	0	0	3	3	0	2
LOC105222726	2.95	2.51	2.33	2.74	2.44	3.1	2.49	2.23	2.72	2.86	2.74	3	2.86	2.84	2.57	2.68	2.65	2.61	3.08	2.58	1.98	1.96	2.44	2.18	2.06	592	425	468	481	418	490	529	316	435	523	417	551	395	343	356	388	491	465	430	406	304	278	466	412
LOC105222727	0.23	0.37	0.93	0.3	0.39	0.41	0.51	0.44	0.47	0.39	0.24	0.45	0.31	0.41	0.34	0.48	0.35	0.43	0.77	0.48	0.67	0.67	0.49	0.57	0.93	25	22	55	22	24	17	30	18	26	16	13	24	15	14	13	17	28	26	33	34	38	43	35	34
LOC105222728	4.34	4.61	4.73	4.21	4.35	4.15	3.58	3.84	4.59	4.66	4.37	3.39	3.02	3.35	3.6	3.43	3.63	3.42	3.6	3.4	3.04	3.48	3.44	2.96	3.52	265	238	289	225	227	200	232	166	224	260	203	190	127	123	152	151	205	186	153	163	142	150	200	170
LOC105222729	0.11	0	0.08	0.06	0.1	0.11	0.16	0.27	0.03	0.09	0.04	0.21	0.24	0	0	0	0.15	0.12	0.16	0.14	0.14	0.35	0.03	0.09	0.21	4	0	3	2	3	3	6	7	1	3	1	7	6	0	0	0	5	4	4	4	4	9	1	3
LOC105222730	0.39	0.36	0.16	0.2	0.21	0.27	0.15	0.08	0.07	0.18	0.14	0.12	0.18	0.15	0.15	0.12	0.23	0.26	0.26	0.16	0.16	0.25	0.19	0.19	0.36	22	17	9	10	10	12	9	3	3	9	6	6	7	5	6	5	12	13	10	7	7	10	10	10
LOC105222731	0.68	0.61	0.57	0.99	0.73	0.13	0.26	0.24	0.32	0.25	0.29	0.1	0.27	0.12	0.16	0.45	0.37	0.39	0.32	0.24	0.61	0.66	0.52	0.58	0.66	48	37	40	60	44	7	20	12	18	16	15	6	13	5	8	23	24	24	16	13	33	32	35	38
LOC105222732	12.48	9.14	12.8	10.17	9.9	11.14	10.86	11.82	16.68	9.74	14.07	13.85	11.23	14.07	18.35	10.42	13.16	14.38	11.41	18.48	12.3	13.04	12.35	11.58	14.46	118	73	121	84	80	83	109	79	126	84	101	120	73	80	120	71	115	121	75	137	89	87	111	103
LOC105222733	0.53	0.32	0.46	0.46	0.47	0.6	0.77	0.88	0.62	0.48	0.99	0.58	0.32	0.52	0.66	0.58	0.55	0.8	1	0.7	1.17	0.96	0.84	1.3	1.39	29	15	25	22	22	26	45	34	27	24	41	29	12	17	25	23	28	39	38	30	49	37	44	67
LOC105222734	1.21	0.96	0.84	0.78	0.37	1.57	1.75	1.19	1.89	2.12	1.29	1.64	1.52	1.4	1.82	1.06	1.4	1.56	1.74	1.77	2.01	1.92	1.62	1.78	2.18	73	49	51	41	19	75	112	51	91	117	59	91	63	51	76	46	78	84	73	84	93	82	93	101
LOC105222735	0.18	0.16	0.14	0.23	0.07	0.08	0.06	0.06	0.04	0.05	0.02	0.03	0	0	0.02	0.15	0.07	0.12	0.04	0.06	0	0.02	0.02	0.02	0.02	12	9	9	13	4	4	4	3	2	3	1	2	0	0	1	7	4	7	2	3	0	1	1	1
LOC105222736	0.23	0.11	0.11	0.07	0.1	0.02	0.02	0.04	0.02	0.03	0.03	0.04	0	0.05	0.02	0.05	0.05	0.03	0.04	0	0	0.06	0.06	0.01	0.01	35	14	17	9	13	3	4	4	2	4	3	5	0	5	2	6	7	4	4	0	0	7	8	1
LOC105222737	0.02	0.02	0	0	0.02	0	0.01	0	0	0	0.02	0.02	0	0	0	0	0	0	0	0	0	0	0	0	0.02	1	1	0	0	1	0	1	0	0	0	1	1	0	0	0	0	0	0	0	0	0	0	0	0
LOC105222738	30.62	28.89	32.95	30.89	31.7	22.31	21.82	22.72	22.7	24.79	18.35	23.73	23.1	24.73	24.89	22.46	23.6	22.91	23.86	27.04	28.12	28.79	25.12	25.46	26.34	1006	802	1083	887	890	578	761	528	596	743	458	715	522	489	566	532	717	670	545	697	707	668	785	787
LOC105222739	0.52	0.92	0.52	0.79	0.35	0.71	0.49	0.85	0.54	0.61	0.74	0.66	0.38	0.64	0.44	0.12	0.05	0.44	0.5	0.71	0.45	0.06	0.14	0.41	0.22	12	18	12	16	7	13	12	14	10	13	13	14	6	9	7	2	1	9	8	13	8	1	3	9
LOC105222741	0.12	0.14	0.22	0.15	0.17	0.47	0.3	0.48	0.32	0.46	0.24	0.28	0.31	0.25	0.21	0.35	0.55	0.29	0.38	0.53	0.44	0.28	0.37	0.47	0.32	11	11	21	12	14	35	30	32	24	40	17	24	20	14	14	24	48	24	25	39	32	19	33	42
LOC105222743	0	0.07	0	0	0	0	0.11	0	0	0	0	0	0	0	0	0	0	0	0	0	0	0	0	0	0	0	1	0	0	0	0	2	0	0	0	0	0	0	0	0	0	0	0	0	0	0	0	0	0
LOC105222744	8.56	7.89	8.44	7.17	8.24	6.21	6.99	5.8	5.7	6.15	8.7	8.62	8.3	6.75	8.57	10.38	10.51	10.11	10.62	11.21	11.86	11.53	12.37	13.46	11.11	430	335	424	315	354	246	373	206	229	282	332	397	287	204	298	376	488	452	371	442	456	409	591	636
LOC105222745	9.33	8.38	8.07	11.09	8.75	14.09	16.61	13.35	22.62	24.93	19.28	16.72	12.19	21.03	22.63	19.35	10.71	18.79	16.65	24.91	27.21	26.23	16.02	20.06	20.71	345	262	298	357	276	411	650	347	665	829	537	565	309	468	566	509	363	614	422	720	766	677	553	688
LOC105222746	13.14	11.5	12.56	12.18	11.37	6.56	8.64	7.01	8.32	8.58	9.12	8.63	10.51	9.73	8.31	11.66	9.56	11.1	9.88	12.56	10.48	10.58	11.05	12.08	12.85	480	355	459	389	355	189	335	181	243	286	253	289	264	214	210	307	323	361	251	360	293	273	384	415
LOC105222747	9.67	10.13	10.52	9.51	8.61	16.63	17.93	17.94	19.79	19.89	18.6	15.26	17.72	20.41	19.21	18.38	14.8	19.08	18.13	19.12	22.08	20.58	19.05	20.99	20.41	356	315	388	306	271	483	701	467	582	668	520	515	449	452	489	488	504	625	464	552	622	535	667	727
LOC105222748	0.52	0.57	1.22	0.8	0.82	0.22	0.33	0.25	0.16	0.53	0.29	0.24	0.13	0.07	0.51	0.61	0.95	0.83	0.94	1	0.29	1.05	0.46	0.98	0.61	12	11	28	16	16	4	8	4	3	11	5	5	2	1	8	10	20	17	15	18	5	17	10	21
LOC105222750	7.54	8.88	8.39	7.67	8.51	7.13	8.63	8.61	8.8	8.64	7.5	9.43	6.66	9.19	7.95	7.36	7.28	8.4	7.44	8.72	9.63	7.28	9.81	10.99	11.06	255	252	282	225	245	190	306	204	236	265	190	291	155	187	185	179	223	250	174	229	246	173	311	348
LOC105222751	0.3	0.44	0.29	1.01	0.43	0.19	0.49	0.21	0.18	0.4	0.1	0.16	0.43	0.25	0.43	0.31	0.88	0	0.64	1.03	0.48	0.31	0.54	0.16	1.21	4	5	4	12	5	2	7	2	2	5	1	2	4	2	4	3	11	0	6	11	5	3	7	2
LOC105222752	0.11	0.03	0.12	0.09	0.08	0.13	0.11	0.02	0.1	0.07	0.24	0.35	0.23	0.15	0.15	0.26	0.39	0.3	0.27	0.44	0.47	0.39	0.22	0.49	0.54	8	2	9	6	5	8	9	1	6	5	14	24	12	7	8	14	27	20	14	26	27	21	16	35
LOC105222753	5.55	4.89	4.83	5.97	4.1	1.63	3.26	2.48	2.53	2	2.97	3.86	3.52	2.39	3.42	3.4	3.74	4.89	3.63	4.82	5.03	5.22	4.54	6.12	5.46	143	106	124	134	90	33	89	45	52	47	58	91	62	37	61	63	89	112	65	97	99	95	111	148
LOC105222754	13.24	13.71	14.24	13.34	13.04	12.28	13.5	12.38	13.49	11.94	11.81	11.44	13.03	11.81	10.31	12.42	10.4	12.24	11.24	9.66	12.44	13.39	11.2	11.24	11.58	327	286	351	288	275	239	353	216	266	269	221	259	221	175	176	221	237	269	193	187	235	233	263	261
LOC105222755	29.59	29.38	30.48	27.62	29.9	24.35	25.95	27.21	27.38	29.59	31.54	34.69	34.11	30.92	31.87	34.24	36.52	34.31	38.57	37.2	37.78	38.56	36.21	38.11	38.64	652	547	672	532	563	423	607	424	482	595	528	701	517	410	486	544	744	673	591	643	637	600	759	790
LOC105222756	42.64	52.77	50.59	53.5	51.46	26.32	35.43	26.21	26.73	32.15	41.42	45.01	38.09	38.98	43.6	48.35	48.22	46.96	52.83	54.16	54.63	52.94	44.55	51.94	49.71	1118	1169	1327	1226	1153	544	986	486	560	769	825	1082	687	615	791	914	1169	1096	963	1114	1096	980	1111	1281
LOC105222757	50.13	48.39	49.05	46.22	44.84	70.34	84.09	68.05	99.93	118.54	76.57	80.48	63.42	89.43	98.33	91.69	63.67	90.65	76.34	99.67	111.68	109.54	90.47	98.09	96.62	1427	1164	1397	1150	1091	1579	2541	1370	2273	3079	1656	2101	1242	1532	1937	1882	1676	2297	1511	2226	2433	2202	2450	2627
LOC105222758	19.42	19.25	18.92	20.4	19.76	19.34	18.46	17.26	19.54	20.03	19.54	17.98	20.22	19.37	18.12	20.36	20.28	22.26	21.77	22.56	22.64	20.54	23.47	22.19	23.22	1540	1290	1501	1414	1339	1209	1554	968	1238	1449	1177	1307	1103	924	994	1164	1487	1571	1200	1403	1374	1150	1770	1655
LOC105222759	10.61	10.19	10.82	11.35	10.63	5.62	8.01	3.65	5.09	5.37	6.69	7.68	7.18	6.1	6.46	10.68	10.18	9.83	9.56	13.38	14.14	14.45	13.14	14.63	16.18	292	237	298	273	250	122	234	71	112	135	140	194	136	101	123	212	259	241	183	289	298	281	344	379
LOC105222760	70.92	70.1	74.55	70.1	74.23	83.88	75.02	81.12	85.71	89.11	76.05	74.55	70.34	71.39	83.13	70.78	68.8	74.95	65.57	65.85	70.11	67.46	62.92	65.71	69.43	949	800	1001	822	854	896	1069	779	917	1101	771	907	642	564	765	678	848	879	605	687	711	631	796	816
LOC105222761	3.32	3.58	3.46	4.91	4.17	1.86	2.21	2.83	3.48	2.73	4.17	4.15	2.77	5.19	3.95	4.53	4.43	5.04	3.58	3.54	6.38	4.35	3.54	4.51	4.75	68	62	71	88	73	30	48	41	57	51	65	78	39	64	56	67	84	92	51	57	100	63	69	87
LOC105222762	163.12	161.6	164.44	164.08	156.08	57.23	69.83	65.34	56.29	61.77	89.92	83.46	74.29	71.37	88.21	97.65	92.15	82.72	95.72	110.73	102.9	101.12	91.95	103.51	106.35	3666	3036	3752	3060	3189	995	1573	924	1003	1186	1366	1676	1129	930	1308	1568	1865	1769	1459	1878	1642	1511	1802	2098
LOC105222763	0.02	0.05	0.04	0.04	0.02	0.03	0.02	0	0	0.01	0.03	0.05	0.08	0.09	0.08	0.07	0.03	0.09	0.12	0.08	0.05	0.04	0.08	0.14	0.11	2	4	4	3	2	2	2	0	0	1	2	4	5	5	5	5	3	8	8	6	4	3	7	13
LOC105222764	139.62	139.41	126.75	133.29	139.33	113.45	135.73	111.23	124.48	129.12	136.07	143.57	135.02	125.41	133.25	118.08	136.83	130.72	132.57	128.4	128.47	131.64	142.38	141.37	129.14	3752	3166	3408	3131	3200	2404	3872	2114	2673	3166	2778	3538	2496	2028	2478	2288	3400	3127	2477	2707	2642	2498	3640	3574
LOC105222765	3.32	3.2	3.41	4.34	2.83	4.87	6.26	7.18	7.42	5.77	5.81	4.35	5.79	4.89	5.76	3.68	5.28	5.12	5.73	6.59	5.58	4.97	6.18	5.35	4.2	70	57	72	80	51	81	140	107	125	111	93	84	84	62	84	56	103	96	84	109	90	74	124	106
LOC105222766	47.4	41.67	37.83	54.58	40.84	19.72	18.99	16.68	22.44	24.09	14.05	17.16	14.04	17.32	15.32	15.79	14.98	15.97	14.46	15.22	14.59	15.53	17.28	16.43	17.66	1482	1096	1190	1463	1093	472	647	386	557	672	338	491	297	333	326	348	426	451	308	388	349	345	511	467
LOC105222767	6.81	6.29	5.42	6.24	6.42	3.45	3.76	3.29	2.47	2.98	4.03	4.3	2.86	2.34	2.59	4.89	5.35	4.99	4.84	5.63	7.38	7.14	7.06	7.37	8.73	296	230	236	230	243	112	168	101	87	109	127	165	82	59	77	158	208	192	149	196	242	216	267	299
LOC105222768	1476.3	1466.31	1413.63	1531.93	1381.21	1779.23	1600.61	1654.42	1582.17	1745.7	1273.23	1265.48	1242.83	1221.56	1168.38	1091.51	1027.26	1086.41	1066.19	938.3	1068.77	998.33	1106.8	1184.05	1155.25	50197.1	41903.9	48252	45161	40186.9	47848.4	57460.8	39677.1	44542.1	54670.2	33184.8	40012.5	29184.8	25585	28295.3	27389.2	32441	33343.9	25403.4	25742.3	28061.8	24359.3	34431.1	37181.5
LOC105222769	0.41	0.66	0.91	1.09	1.14	1.25	1.25	0.82	1.22	1.11	1.34	1.05	1.03	0.93	1.28	1.46	1.44	1.44	1.39	1.36	1.85	1.49	1.35	1.71	2	19.87	27.05	43.96	46	47.05	47.62	64.17	27.93	46.88	48.79	49.24	46.5	34.15	26.95	42.72	50.79	64.05	62.06	46.56	51.66	68.21	50.7	61.9	77.47
LOC105222770	50.82	49.08	49.08	51.27	47.2	59.15	51.74	59.93	58.75	53.28	53.04	50.7	54.6	52.77	46.71	55.94	48.47	49.32	49.82	47.1	51.57	48.03	54.78	55.75	54.06	1338	1092	1293	1180	1062	1228	1446	1116	1236	1280	1061	1224	989	836	851	1062	1180	1156	912	973	1039	893	1372	1381
LOC105222771	5.05	5.45	5.36	4.65	6.07	4.37	3.97	4.4	4.86	4.67	5.68	6.07	4.83	5.17	5.82	6.32	7.08	6.91	6.68	7.37	7.26	7.34	7.77	7.39	6.31	346.39	316.85	367.55	278.5	355.52	236.97	289.88	213.79	267.59	293.45	296.98	382.91	228.94	213.92	275.78	312.66	450.12	422.79	319.17	396.62	381.68	355.84	507.59	478.26
LOC105222772	27.48	27.13	27.23	28.52	31.15	25.58	26.45	28.39	28.23	26.07	24.12	23.95	21.33	24.86	24.28	26.62	26.11	26.43	28.85	28.42	28.67	26.93	30.31	30.11	30.17	1501	1254	1493	1364	1455	1102	1538	1095	1234	1302	1004	1205	801	819	918	1052	1324	1289	1100	1221	1201	1041	1577	1547
LOC105222773	3.01	2.91	3.17	3.42	3.25	2.64	3.92	3.31	2.95	2.88	3.94	3.57	4.06	3.75	4.07	5.45	4.75	5.35	4.76	6.04	6.36	5.69	4.56	5.46	5.52	318	259	333	312	288	219	439	244	247	272	311	349	291	241	301	420	478	505	355	508	512	422	450	531
LOC105222774	1.65	1.55	1.5	1.52	1.57	1.3	1.45	0.64	1.94	2.15	1.15	1.92	0.62	2.14	2.3	2.79	1.29	2.29	2.04	3.44	3.64	3.88	2.48	2.58	3.57	124	86	107	89	83	71	98	29	104	131	58	114	31	83	110	140	87	138	100	191	190	173	155	167
LOC105222775	0	0	0	0	0	0	0	0	0	0	0	0	0	0	0	0	0	0	0	0	0	0	0	0	0	0	0	0	0	0	0	0	0	0	0	0	0	0	0	0	0	0	0	0	0	0	0	0	0
LOC105222776	0	0	0	0	0	0	0	0	0	0	0	0	0	0	0	0	0	0	0	0	0	0	0	0	0	0	0	0	0	0	0	0	0	0	0	0	0	0	0	0	0	0	0	0	0	0	0	0	0
LOC105222777	0	0	0	0	0	0	0	0	0	0	0	0	0	0	0	0	0	0	0	0	0	0	0	0	0	0	0	0	0	0	0	0	0	0	0	0	0	0	0	0	0	0	0	0	0	0	0	0	0
LOC105222778	33.69	33.4	27.02	33.5	34.88	38.25	40.82	42.21	42.27	42.95	44.75	41.2	43.91	46.39	42.19	50.02	43.19	46.9	48.32	41.37	41.2	43.21	44.53	40.72	42.28	765	641	614	665	677	685	984	678	767	890	772	858	686	634	663	819	907	948	763	737	716	693	962	870
LOC105222779	0	0	0	0	0	0	0	0	0	0	0	0	0	0	0	0	0	0	0	0	0	0	0	0	0	0	0	0	0	0	0	0	0	0	0	0	0	0	0	0	0	0	0	0	0	0	0	0	0
LOC105222780	5.88	5.98	6.35	5.75	6.4	6.81	6.76	6.97	6.92	6.82	6.03	5.31	6.43	6.15	6.67	5.79	7.14	7.14	5.77	6.16	5.78	6.54	6.98	7.8	7.32	186	160	201	159	173	170	227	156	175	197	145	154	140	117	146	132	209	201	127	153	140	146	210	232
LOC105222781	0.09	0	0.03	0.1	0.07	0.07	0.08	0.04	0.07	0.07	0.08	0.2	0	0.05	0.04	0.04	0.13	0.07	0.04	0.07	0.46	0.13	0.09	0.44	0.11	3.02	0	1.01	3.02	2	2	3.02	1	2.02	2.04	2	6.14	0	1	1.03	1.01	4	2	1.02	2	12	3.18	3	14
LOC105222782	4.43	4.5	5.4	6.25	5.97	3.33	4.11	3.42	2.99	3.39	3.92	3.99	3.73	3.09	3.37	3.6	3.8	4.41	3.99	4.4	3.39	3.5	3.16	3.2	3.55	149.98	129	182.99	184.98	173	89	147.98	82	80.98	104.96	101	123.86	87	63	78.97	87.99	119	133	93.98	117	88	83.82	102	102
LOC105222783	132.13	139.42	123.96	130.44	124.32	210.08	200.14	180.04	204.42	217.24	199.33	186.02	180.3	192.98	175.85	197.19	180.13	202.32	170.88	178.05	196.47	188.32	169.2	194.67	176.85	4592	4101	4318	3970	3692	5748	7372	4419	5666	6869	5251	5911	4303	4027	4220	4930	5776	6249	4117	4842	5210	4611	5576	6344
LOC105222784	33.93	26.36	28.68	21.28	23.46	17.11	17.77	14.26	16.72	14.79	13.97	19.29	15.81	15.46	20.64	17.26	19.55	21.64	16.96	24.72	20.54	20.59	27.41	24.79	29.34	259	170	219	142	153	103	144	77	102	103	81	135	83	71	109	95	138	147	90	148	120	111	199	178
LOC105222785	6.27	6.75	6.37	6.17	5.47	2.08	3.48	2.98	2.76	4.84	4.06	5.15	4.33	4.95	2.9	5.49	4.89	4.44	3.99	4.26	4.77	4.44	5.56	5.95	6.24	122	111	124	105	91	32	72	41	43	86	60	92	58	58	39	77	88	77	54	65	71	61	103	109
LOC105222786	1.61	1.9	0.63	2.95	1.39	6.73	1.45	0.59	0.61	2.37	3.03	0.23	0.3	0.81	0.61	0.1	0.3	0.86	1.41	0.44	3.37	0.2	2.57	0.15	0.62	23	23	9	37	17	76	22	6	7	31	33	3	3	7	6	1	4	11	14	5	37	2	35	2
LOC105222787	22.56	22.57	23.39	22.85	23.8	14.39	14.66	15.68	14.35	15.53	17.86	18	18.43	17.73	17.35	20.45	19.62	17.73	20.03	22.7	19.94	22.74	18.34	19.61	21.22	1302	1101	1351	1153	1174	655	898	640	662	818	783	953	732	616	693	851	1047	911	804	1028	881	927	1007	1065
LOC105222788	0.61	0.39	0.54	0.46	0.6	0.13	0.24	0.18	0.18	0.16	0.11	0.36	0.19	0.19	0.14	0.3	0.08	0.18	0.29	0.05	0.22	0.32	0.4	0.05	0.29	43	23	38	28	36	7	18	9	10	10	6	23	9	8	7	15	5	11	14	3	12	16	27	3
LOC105222789	6.32	7.42	6.74	7.72	7.52	7.28	7.66	6.48	6.82	7.45	7.7	6.63	7.12	6.47	6.23	7.6	6.81	7.49	7.88	8.19	7.19	8.58	8.95	8.62	9.31	239	237	255	255	243	217	307.57	173.25	206	257	221.2	230	185.1	147.18	163	207.17	238	252	207.27	243	208	229	322	306.43
LOC105222790	7.73	6.6	4.22	7.06	5.19	39.01	57.61	42.58	52.72	47.65	66.06	68.93	59.27	63.39	67.47	79.75	70.24	75.71	75.1	82.24	87.07	90.65	99.98	88.51	92.53	183	132	100	146	105	728	1447.43	712.75	997	1029	1187.8	1496	964.9	902.82	1105	1360.83	1537	1595	1235.73	1527	1577	1515	2251	1970.57
LOC105222791	14.58	5.62	1.29	13.77	5.55	4.43	1.26	3.36	5.08	4.4	6.19	3.34	1.82	5.74	3.74	1.44	1.54	3.88	2.17	3.52	2.76	1.34	2.77	4.17	2.95	338	110	30	279	110	81	31	55	94	93	109	71	29	80	60	24	33	80	35	64	49	22	61	91
LOC105222792	0.25	0.09	0	0.29	0.3	0	0.03	0	0.05	0.08	0	0	0.05	0	0	0.05	0.04	0	0.1	0	0	0	0	0	0	7	2	0	7	7	0	1	0	1	2	0	0	1	0	0	1	1	0	2	0	0	0	0	0
LOC105222793	0	0	0	0	0.05	0	0	0	0	0	0.03	0	0	0	0	0.03	0	0	0	0.03	0.03	0.03	0	0	0	0	0	0	0	2	0	0	0	0	0	1	0	0	0	0	1	0	0	0	1	1	1	0	0
LOC105222794	21.71	25.05	25.05	22.83	23.71	49.62	48.54	52.49	49.59	46.14	51.29	59.52	59.99	58.55	51.76	56.77	65.17	58.05	58.53	61.51	54.04	63.42	78.43	70	67.34	1482	1445	1711	1362	1383	2671	3517	2534	2705	2874	2660	3726	2817	2405	2445	2794	4113	3527	2778	3294	2823	3057	5093	4495
LOC105222795	3.52	2.14	2.25	1.45	1.06	26.78	13.94	16.46	15.92	18.59	59.38	22.93	26.89	19.49	42.64	24.28	10.15	23.72	10.77	48.99	34.07	34.75	15.84	29.44	30.48	39	20	25	14	10	234	164	129	141	188	500	233	205	130	327	194	104	234	83	426	289	272	167	307
LOC105222796	0	0	0	0	0	0	0	0	0	0	0	0	0	0	0	0	0	0	0	0	0	0	0	0	0	0	0	0	0	0	0	0	0	0	0	0	0	0	0	0	0	0	0	0	0	0	0	0	0
LOC105222797	0.29	0.12	0.22	0.2	0.15	0.02	0.03	0.05	0.11	0.17	0.02	0.06	0.15	0.03	0.05	0.15	0.31	0.14	0.28	0.14	0.18	0.1	0.25	0.32	0.26	17.61	6.15	13.45	10.5	7.48	1.03	2.12	2.21	5.41	9.55	1.02	3.09	6.06	1.08	2.22	6.34	16.88	7.21	11.83	6.38	8.32	4.16	14.41	17.74
LOC105222798	40.84	41.07	42.56	35.44	40.8	26.61	37.54	27.56	24.81	25.68	35.42	39.48	33.27	26.25	34.22	43.82	45.34	41.18	48.13	48.57	46.87	48.33	53.05	49.76	51.57	985	837	1027	747	841	506	961	470	478	565	649	873	552	381	571	762	1011	884	807	919	865	823	1217	1129
LOC105222799	5.13	2.28	3.38	4.1	3.42	2.13	2.8	3.05	2.93	1.67	1.44	1.8	1.85	2.2	1.43	3.63	1.04	2.91	2.85	2.27	2.32	2.66	2.32	1.59	1.45	202	76	133	141	115	66	117	85	92	60	43	65	50	52	39	103	38	102	78	70	70	74	87	59
LOC105222800	8.32	7.59	9.19	8.43	9.11	13.02	9.28	11.24	12.8	12.52	10.63	11.42	13.42	11.35	12.44	12.4	12.22	12.93	11.97	12.45	10.5	11.32	13.97	11.93	12.2	201	155	222	178	188	248	238	192	247	276	195	253	223	165	208	216	273	278	201	236	194	193	321	271
LOC105222801	28.39	24.48	21.83	29.24	25.74	6.11	5.18	4.74	5.7	5.68	6.41	7.08	6.55	6.7	4.84	6.54	6.46	7.06	6.93	5.54	5.48	6.82	5.73	5.18	7.29	542	395	417	488	420	92	105	64	87	99	93	124	86	77	64	90	114	120	92	83	80	92	104	93
LOC105222802	9.2	9.4	8.09	11.25	7.89	13.54	14.56	14.2	12.16	12.18	13.01	12.78	13.85	12.52	13.11	18.25	15.43	15.85	12.33	13.09	15.94	16.37	20.18	17	20.82	346	303	323	359	279	435	597	395	388	427	392	465	394	299	350	513	590	558	342	431	473	458	745	628
LOC105222803	11.78	11.66	10.78	10.9	11.23	13.18	13.78	12.56	14.41	13.5	12.66	12.89	13.69	13.25	13.8	14.92	13.86	14.03	13.74	14.71	15.56	15.85	16.87	16.17	14.98	545	456	499	441	444	481	677	411	533	570	445	547	436	369	442	498	593	578	442	534	551	518	743	704
LOC105222804	0	0	0	0	0	0	0	0	0	0	0	0	0	0	0	0	0	0	0.02	0.02	0	0	0	0	0	0	0	0	0	0	0	0	0	0	0	0	0	0	0	0	0	0	0	1	1	0	0	0	0
LOC105222806	8.81	8.86	8.33	6.84	8.26	6.44	6.57	6.53	5.89	5.81	4.05	4.85	4.56	4.55	5.28	5.51	6.14	5.03	4.88	5.69	5.83	5.92	6.86	6.18	6.1	685	582	648	465	549	395	542	359	366	412	239	346	244	213	284	309	441	348	264	347	347	325	507	452
LOC105222807	15.35	16.1	16.49	15.76	15.57	11.27	10.34	10.04	10.96	11.33	12.87	13.12	13.35	11.02	12.23	13.09	12.83	13.18	13.52	12.2	15.39	16.62	16.14	14.06	18.24	361	320	388	324	313	209	258	167	206	243	230	283	216	156	199	222	279	276	221	225	277	276	361	311
LOC105222808	29.89	34.26	32.46	31.77	32.14	27.35	27.36	25.27	25.13	26.57	18.27	18.01	16.73	20.04	20.55	14.84	14.92	19.27	15.33	15.59	18.31	16.59	17.94	18.41	16.81	704	682	765	654	647	508	684	421	473	571	327	389	271	284	335	252	325	404	251	288	330	276	402	408
LOC105222809	0.14	0.16	0.17	0.45	0.17	0.05	0.21	0.11	0.1	0.15	0.06	0.18	0.1	0.15	0.12	0.16	0.23	0.3	0.28	0.25	0.04	0.06	0.12	0.26	0.17	20	20	24	57	20	6	31	11	11	19	6	23	10	12	12	16	30	38	28	28	4	6	16	34
LOC105222810	3.42	10.38	5.74	16.69	4.45	33.17	0.15	0.11	0	0.17	0.1	0.08	0	0	0	0.11	0.08	0	0	0	0.1	0	0	0	0	44	113	74	188	49	337	2	1	0	2	1	1	0	0	0	1	1	0	0	0	1	0	0	0
LOC105222811	0	0.21	0.17	0	0	0	0	0	0.11	0	0	0	0	0	0	0	0	0	0.25	0	0.23	0	0.18	0.09	0	0	2	2	0	0	0	0	0	1	0	0	0	0	0	0	0	0	0	2	0	2	0	2	1
LOC105222812	41.94	44.69	45.1	45.03	40.69	65.23	57.21	64.09	64.31	64.25	64.38	60.75	60.25	62.03	55.89	53.91	58.44	56.1	62.08	57.15	60.64	58.9	59.56	64.12	60.57	1709	1539	1839	1604	1417	2096	2475	1847	2094	2389	1993	2270	1689	1521	1576	1584	2202	2035	1759	1827	1891	1695	2309	2458
LOC105222813	3.88	3.61	3.56	4.19	4.22	3.33	4.42	3.52	3.7	4.64	3.96	3.3	3.58	3.48	3.69	3.27	2.52	3.35	3.41	3.19	3	3.05	3.37	2.94	3.03	304	239	279	287	283	206	368	195	232	332	236	237	193	164	200	185	183	234	186	196	180	169	251	217
LOC105222814	141.02	139.56	143.42	140.86	141.59	143.73	158.55	144.23	143.95	158.18	166.37	158.03	168.87	161.02	156.96	145.62	161.4	161.52	164.3	144.31	144.09	144.51	159.56	160.35	143.19	3586	2999	3649	3131	3077	2882	4280	2594	2925	3670	3214	3685	2954	2464	2762	2670	3795	3656	2905	2879	2804	2595	3860	3836
LOC105222816	129.86	129.68	123.35	125.37	121.26	232.46	230.12	231.51	238.75	227.68	200.92	182.29	210.16	178.83	190.48	170.3	180.86	173.18	191	175.75	160.98	169.92	195.09	165.42	169.03	7700	6498	7318	6498	6145	10869	14485	9709	11312	12318	9051	9912	8573	6381	7816	7281	9916	9141	7875	8176	7305	7115	11005	9228
LOC105222817	25.83	23.99	26.13	23.63	24.01	16.24	19.27	17.67	17.13	18.65	25.12	22.98	24.19	23.56	21.78	21.92	21.17	25.02	24.01	22.71	21.98	22.02	24.96	23.11	22.08	1072	838	1085	851	853	527	841	516	565	701	791	865	684	583	620	654	809	917	687	733	697	637	979	895
LOC105222818	40.62	40.11	38.2	39.84	38.03	20.53	25.59	20.74	19.91	22.12	25.94	27.23	26.04	25.75	27.27	35.22	30.42	32.53	34.34	36.76	36.41	36.89	40.65	40.46	43.76	1941	1620	1826	1664	1553	773	1297	701	760	964	941	1193	856	740	901	1213	1344	1383	1141	1378	1331	1244	1847	1818
LOC105222819	0.02	0.03	0.02	0.14	0	0.13	0.05	0.04	0.06	0.03	0.36	0.14	0.18	0.12	0.14	0.8	0.35	0.25	0.83	0.41	0.82	0.25	0.39	0.29	0.66	1	1	1	5	0	4	2	1	2	1	11	5	5	3	4	23	13	9	23	13	25	7	15	11
LOC105222820	80.36	75.53	74.14	81.07	78.5	56.56	83.28	53.55	59.62	54.74	72.01	61.84	56.48	55.28	63.12	76.77	74.28	73.78	75.41	77.88	84.73	85.65	83.89	87.37	95.87	2616	2078	2415	2307	2184	1452	2878	1233	1551	1626	1781	1846	1265	1083	1422	1802	2236	2138	1707	1989	2111	1969	2598	2676
LOC105222821	7.77	6.88	7.47	6.74	7.44	3.21	4.15	3.11	3.02	3.66	5.87	6.26	5.52	5.55	5.6	9.76	9.04	9.12	11.06	10.2	10.58	10.19	10.21	10.87	11.02	821	614	789	622	672	267	465	232	255	353	471	606	401	353	409	743	883	857	812	845	855	760	1026	1080
LOC105222822	5.14	5.4	4.94	4.86	4.87	2.5	4.46	3.01	3.49	2.71	4.81	3.95	2.88	3.09	3.79	6.54	6.42	6.36	6.79	6.66	9.05	9.2	9.47	8.79	10.7	304	270	292	251	246	113	280	126	165	146	216	214	117	110	155	279	351	334	277	309	407	384	531	489
LOC105222823	1847.41	1776.98	1641.17	1855.1	1685.02	1468.68	1335.71	1311.4	1488.46	1516.54	1334.32	1274.45	1255	1282.93	1278.17	1123.17	1115.68	1162.83	1101.3	1001.5	1056.88	1065.04	1242.71	1145.37	1109.7	50061	40692	44496	43940	39023	31382	38423	25133	32229	37496	27469	31669	23395	20920	23968	21945	27954	28049	20750	21291	21917	20380	32036	29199
LOC105222824	11.18	11.18	9.86	12.14	10.3	4.36	6.59	4.44	4.88	6.13	7.31	6.06	5.72	6.52	6.88	8.73	7.56	8.36	7.77	10.59	12.01	10.08	10.99	11.12	10.92	696	588	603	668	542	210	436	191	244	345	353	347	238	239	282	381	425	461	339	513	558	434	639	637
LOC105222825	1.18	1.22	1.06	1.37	1.08	0.76	1.31	0.6	0.85	0.82	0.69	0.71	0.49	0.62	0.83	1.04	1.31	0.99	1.18	1.26	1.92	1.97	1.72	1.93	1.6	115	100	103	116	90	58	135	41	66	73	51	63	33	36	56	73	118	86	80	96	143	135	159	176
LOC105222826	87.04	92.66	96.44	99.55	96.13	60.91	65.07	55.61	52.36	54.06	80.57	74.39	83	75.29	73.31	83.31	98.1	83.67	90.43	84.48	83.52	82.86	103.27	91.52	93.39	4985	4501	5512	5018	4725	2766	3977	2242	2389	2828	3481	3893	3204	2597	2874	3444	5193	4266	3594	3777	3664	3292	5525	4874
LOC105222828	13.98	12.95	13.07	13.93	13.41	8.8	9.44	8.92	9.24	8.77	7.95	8.39	8.49	10.37	10.27	8.93	7.76	7.91	8.16	9.66	12.08	9.97	8.63	9.9	9.63	419	328	392	365	341	208	298	188	220	236	181	229	175	187	213	193	215	211	170	227	277	211	246	279
LOC105222829	4.24	3.94	3.53	3.06	3.84	4.09	2.52	2.57	2.78	3.43	2.99	2.42	2.71	2.85	3.21	2.52	2.84	2.95	2.47	2.06	1.78	2.71	4.35	2.95	4.21	84	66	70	53	65	64	53	36	44	62	45	44	37	34	44	36	52	52	34	32	27	38	82	55
LOC105222830	65.18	64.33	62.75	63.97	67.28	52.06	51.26	51.77	51.45	55.25	52.12	49.91	52.99	50.08	51.83	50.39	46.15	53.31	52.7	51.93	54.87	52.05	57.69	56.62	56.5	2585	2135	2466	2211	2261	1582	2111	1415	1609	1935	1557	1791	1420	1181	1394	1432	1692	1852	1451	1602	1666	1447	2156	2099
LOC105222832	7.81	7.59	7.48	6.68	7.68	4.77	9.64	4.71	4.8	6.05	8.01	8.68	6.07	7.35	7	12.4	11.82	10.45	12.24	13.18	15.99	14.97	16.44	15.86	16.1	413	339	396	309	347	199	541	176	203	292	322	421	221	234	256	473	578	492	450	547	647	559	827	789
LOC105222833	14.8	13.49	13.66	13.6	13.31	10.9	13.4	11.13	10.86	11.93	23.32	19.81	19.63	17.77	19.77	38.06	32.9	32.9	35.23	33.45	40.85	37.67	40.19	40.84	42.38	1438	1107	1337	1162	1106	839	1370	771	847	1060	1733	1769	1312	1041	1358	2674	2960	2856	2384	2562	3059	2605	3678	3728
LOC105222834	4.35	1.56	2.06	5.24	2.48	149.26	0.05	0.57	0.14	0.25	50.31	0	0.25	0	0	0	0	0.06	0.08	0	0	0.08	0.24	0.18	0.07	76	23	36	80	37	2057	1	7	2	4	668	0	3	0	0	0	0	1	1	0	0	1	4	3
LOC105222835	0	0	0.02	0	0	0.02	0.04	0.05	0	0	0.02	0.1	0.11	0	0	0.13	0.04	0	0.03	0	0	0.03	0.08	0.08	0.05	0	0	1	0	0	1	2	2	0	0	1	5	4	0	0	5	2	0	1	0	0	1	4	4
LOC105222836	0.68	0.68	0.41	1.24	0.62	0.86	0.6	0.32	0.77	0.4	1.08	0.38	0.21	0.72	0.62	0.17	0.33	0.6	0.15	0.26	0.59	0.61	0.19	0.26	0.8	33	28	20	53	26	33	31	11	30	18	40	17	7	21	21	6	15	26	5	10	22	21	9	12
LOC105222837	4.29	3.78	4.98	4.37	4.88	10.56	9.65	8.96	7.97	9	7.82	8.89	6.59	6.57	7.01	11.59	12.6	8.92	11.27	11.7	6.57	6.86	7.11	7.69	8.42	532	395	615	475	516	1028	1267	782	789	1018	734	1007	562	488	598	1031	1438	983	968	1137	623	598	834	892
LOC105222838	0	0	0	0	0	0	0	0.17	0.15	0.53	0	0	0.18	0.2	0	0.17	0	0	0	0	0	0	0.13	0	4.6	0	0	0	0	0	0	0	1	1	4	0	0	1	1	0	1	0	0	0	0	0	0	1	0
LOC105222839	41.57	35.4	39.27	34.39	36.36	41.57	42.36	45.12	34.73	33.07	42.52	46.04	40.97	36.73	46.95	49.87	54.85	54.62	51.51	50.86	55.17	52.82	75.6	73.87	64.17	1149	827	1086	831	859	906	1243	882	767	834	893	1167	779	611	898	994	1402	1344	990	1103	1167	1031	1988	1921
LOC105222840	19.2	19.05	19.29	19	19.81	32.81	30.88	30.5	29.93	30.06	37.83	34.2	37.97	36.73	31.96	42.22	42.03	40.84	43.71	41.96	39.65	39.5	41.68	44.18	41.58	1901	1582	1905	1644	1668	2528	3232	2122	2357	2713	2838	3106	2579	2192	2182	2993	3804	3599	2991	3253	3007	2761	3919	4100
LOC105222841	6.93	6.44	7.1	6.93	7.12	7.32	7.66	7.2	6.81	6.41	8.01	8.17	7.55	7.04	7.56	9.62	9.88	9.09	9.92	10.89	9.76	9.52	8.3	9.07	9.31	839	660	862	735	738	699	986	618	660	709	738	909	630	514	635	842	1109	982	837	1035	902	816	954	1035
LOC105222842	12.79	12.3	11.78	13.46	12.42	23.55	26.43	28.46	26.51	25.28	15.91	14.56	18.17	17.11	14.81	12.21	14.37	14.95	11.86	12.07	11.86	11.4	10.21	11.1	11.85	523	425	482	481	434	759	1147	823	866	943	494	546	511	421	419	360	543	544	337	387	371	329	397	427
LOC105222843	19.29	19.97	23.78	22.07	23.76	22.04	23	21.63	19.71	19.3	24.06	25.15	24.28	22.34	24.14	26.45	24.21	25.28	22.09	23.02	21.98	25.49	24.06	24.22	25.05	343	300	423	343	361	309	434	272	280	313	325	410	297	239	297	339	398	400	273	321	299	320	407	405
LOC105222844	5.17	5.45	5.63	4.51	5.86	8.12	6.65	5.77	8.34	7.2	6.72	6.22	6.56	5.51	5.56	5.98	4.48	5.4	5.39	4.86	6.33	5.12	6.66	5.43	5.41	156	139	170	119	151	193	213	123	201	198	154	172	136	100	116	130	125	145	113	115	146	109	191	154
LOC105222845	0.05	0	0.03	0.02	0	0.04	0.04	0	0	0	0	0.08	0.09	0	0	0	0.02	0	0.04	0	0.02	0.04	0.02	0.02	0	3	0	2	1	0	2	3	0	0	0	0	5	4	0	0	0	1	0	2	0	1	2	1	1
LOC105222846	0.12	0.05	0.19	0.11	0.22	0.02	0.09	0	0.03	0.02	0.03	0.02	0.05	0	0	0.06	0.03	0	0	0.13	0.03	0.03	0.06	0.05	0.07	10	3	14	8	16	1	7	0	2	1	2	1	3	0	0	3	2	0	0	8	2	2	5	4
LOC105222847	3.48	3.73	2.77	3.54	3.04	1.87	2.07	2.35	1.82	2.49	1.96	1.94	1.86	1.97	1.93	1.99	1.86	1.57	2.01	2.17	1.42	1.98	2.03	1.83	1.89	182	165	145	162	136	77	115	87	76	119	78	93	67	62	70	75	90	73	73	89	57	73	101	90
LOC105222849	5.14	5.24	4.89	5.14	4.71	3.57	3.85	3.27	4.07	3.87	4.51	4.58	4.49	4.97	4.39	5.45	5.4	4.94	5.83	5.88	4.8	5.39	5.23	5.51	5.64	498	429	474	435	390	273	396	224	315	342	332	407	299	290	294	381	484	426	393	447	356	369	482	502
LOC105222850	0	0.02	0	0.02	0	0.05	0	0	0.05	0	0.03	0.13	0.03	0	0	0.11	0.06	0.02	0.08	0	0.1	0.08	0.04	0.04	0.17	0	1	0	1	0	2	0	0	2	0	1	6	1	0	0	4	3	1	3	0	4	3	2	2
LOC105222851	0.1	0.49	0.05	0.06	0.12	0.46	0.59	0.07	0.39	0.68	0.75	0.51	0.6	0.26	1.05	0.65	0.9	0.76	0.9	0.6	1.08	0.95	0.6	0.94	0.85	2	8	1	1	2	7	12	1	6	12	11	9	8	3	14	9	16	13	12	9	16	13	11	17
LOC105222852	0.09	0	0	0	0	0.04	0.03	0	0	0.1	0	0	0.05	0.11	0	0.04	0	0	0.05	0	0	0	0	0.03	0.2	3	0	0	0	0	1	1	0	0	3	0	0	1	2	0	1	0	0	1	0	0	0	0	1
LOC105222853	14.13	11	12.34	12.92	10.88	28.84	23.03	26.04	34.37	34.68	25.2	24.8	20.33	25.65	29.71	24.33	15.99	21.71	18.7	20.09	25.77	24.02	21.92	23.48	23.3	389	256	340	311	256	626	673	507	756	871	527	626	385	425	566	483	407	532	358	434	543	467	574	608
LOC105222854	0	0	0.01	0.02	0.02	0.02	0	0	0	0	0	0	0	0	0	0	0	0.01	0	0	0.02	0	0	0	0	0	0	1	1	1	1	0	0	0	0	0	0	0	0	0	0	0	1	0	0	1	0	0	0
LOC105222855	3.64	2.6	2.83	4.11	2.73	5.81	6.09	6.1	5.28	6.84	5.62	4.85	5.68	4.18	5.52	5.17	5.15	5.6	6.01	6.24	4.58	6.3	7.27	6.11	6.14	81	49	63	80	52	102	144	96	94	139	95	99	87	56	85	83	106	111	93	109	78	99	154	128
LOC105222856	42.24	39.04	40.45	40.96	39.28	52.03	55.18	44.71	48.58	52.47	54.65	49.58	51.07	48.79	47	54.32	49.8	55.64	55.54	54.77	61.83	56.57	58.04	56.68	57.55	1456	1137	1395	1234	1157	1414	2019	1090	1338	1650	1431	1567	1211	1012	1121	1350	1587	1707	1331	1481	1631	1377	1903	1838
LOC105222857	16.86	5.15	6.83	4.21	9.93	3.81	5.59	4.94	6.72	4.69	2.27	4.3	6.39	4.87	2.71	3.96	3.33	4.51	3.56	4.45	6.08	3.3	8.49	6.31	7.84	449	116	182	98	226	80	158	93	143	114	46	105	117	78	50	76	82	107	66	93	124	62	215	158
LOC105222858	4.63	4.76	5.42	5.7	6.03	2.88	3.46	3.21	2.19	2.49	2.53	3.15	1.78	3.78	2.78	5.7	5.67	4.52	4.65	6.02	5.48	4.95	6.16	4.27	5.09	53	46	62	57	59	26	42	26	20	26	22	33	14	26	22	47	60	46	37	54	48	40	67	46
LOC105222859	66.41	67.03	66.99	63.47	59.45	91.54	86.81	91.12	74.65	78.78	76.09	78.32	73.32	70.75	73.86	55.98	63.05	63.77	53.19	54.82	46.8	53.68	57.67	59.82	54.64	1081	922	1091	903	827	1175	1500	1049	971	1170	941	1169	821	693	832	657	949	924	602	700	583	617	893	916
LOC105222860	0.71	0.46	0.34	2.01	0.49	0.66	1.51	0.74	0.79	0.8	1	1.31	1.07	1.04	1.51	0.98	0.85	1.06	0.87	0.57	1.16	1.52	1.62	1.36	1.19	27	15	13	67	16	20	61	20	24	28	29	46	28	24	40	27	30	36	23	17	34	41	59	49
LOC105222861	109.48	107.81	102.15	109.18	105.66	127.54	115.18	127.31	115.27	120.93	85.46	88.07	87.41	92.38	84.31	71.03	69.78	74.27	71.21	70.41	66.15	67.93	71.88	68.79	63.13	4096	3441	3864	3585	3402	3768	4609	3412	3455	4129	2431	3043	2274	2095	2177	1923	2429	2515	1867	2083	1900	1793	2564	2446
LOC105222862	61.27	53.19	59.64	49.01	57.93	24.22	37.08	20.87	27.71	28.52	21.59	26.99	18.48	14.52	25.35	34.78	35.83	38.21	34.11	43.57	52.08	56.9	49.25	53.03	54.69	2839	2083	2765	1985	2294	885	1824	684	1026	1206	760	1147	589	405	813	1162	1535	1576	1099	1584	1847	1862	2171	2312
LOC105222863	4.9	5.36	5	5.96	5.48	3.29	4.13	3.3	3.82	3.35	4.39	4.52	4.06	4.23	3.85	5.28	5.1	5.26	5.7	6.64	6.63	6.36	5.04	5.89	7.02	279	258	285	297	267	148	250	133	174	174	190	236	159	145	152	217	269	267	226	297	289	256	273	316
LOC105222864	19.04	19.22	19.21	18.98	18.93	27.12	26.83	27.78	23.95	22.81	21.1	22.18	26.41	26.51	21.49	21.59	24.89	22.95	24.87	22.1	19.24	18.84	19.55	20.99	20.85	1195	1019	1206	1041	1015	1342	1787	1233	1201	1306	1006	1276	1140	1001	933	977	1444	1282	1085	1088	924	835	1167	1239
LOC105222865	3.87	3.09	3.73	2.39	4.52	3.63	5.53	3.82	5.05	5.27	3.44	4.67	2.99	3.51	5.63	9.1	5.14	8.37	8.2	10.81	13.96	13.94	9.94	10.26	11.65	139	94	134	75	139	103	211	97	145	173	94	154	74	76	140	236	171	268	205	305	384	354	340	347
LOC105222866	0	0.01	0.01	0.05	0.02	0.03	0.06	0.03	0.03	0.07	0.09	0.03	0.03	0.07	0.04	0.13	0.15	0.1	0.26	0.14	0.16	0.16	0.2	0.17	0.14	0	1	2	6	2	3	10	3	4	9	10	4	3	6	4	14	21	14	27	16	18	17	28	24
LOC105222867	0.21	0.19	0.4	0.28	0.25	3.06	3.12	2.83	1.7	3.01	0.6	0.7	0.54	1.07	0.27	0.44	0.35	0.63	0.39	0.27	0.56	0.34	0.53	0.51	0.41	8	6	15	9	8	90	124	75	51	103	17	24	14	24	7	12	12	21	10	8	16	9	19	18
LOC105222868	221.78	210.85	211.62	220.97	201.35	286.81	263.99	299.3	271.14	259.65	254.74	252.4	268.6	261.63	267.72	216.7	240.97	213.22	216.48	197.44	175.86	177.12	216.2	196.69	200.55	4105	3298	3919	3575	3185	4186	5187	3918	4010	4385	3582	4284	3420	2914	3429	2892	4124	3513	2786	2867	2491	2315	3807	3425
LOC105222869	27.69	24.65	25.32	26.72	24.56	16	20.02	15.61	17.9	17.49	18.18	20.02	14.15	15.93	21.35	23.71	21.75	24.04	22.6	29.19	34.82	33.04	32.22	30.96	35.98	879	666	806	741	675	401	673	354	453	511	437	581	310	308	467	542	643	679	502	727	849	737	967	916
LOC105222870	10.59	10.58	11.89	12.79	13.46	13.84	12.88	13.57	16.79	14.99	14.02	13.05	11.66	13.66	15.68	13.5	11.66	12.19	11.63	12.07	11.6	13.69	9.26	10.06	7.74	161	136	181	170	175	166	208	146	204	208	162	182	122	125	165	148	164	165	123	144	135	147	134	144
LOC105222871	26.92	24.99	22.87	23.52	24.63	5.34	6.14	5.51	6.06	6.44	5.93	7.02	6.26	6.37	5.44	6.56	6.08	6.95	6.13	7	8.17	8.28	8.51	9.84	8.54	1201	942	1021	917	939	188	291	174	216	262	201	287	192	171	168	211	251	276	190	245	279	261	361	413
LOC105222872	16.74	17.3	18.78	16.23	16.57	11.71	14.16	11.84	11.96	14.35	14.14	13.13	14.06	13.27	12.76	15.44	14.58	16.14	14.86	16.11	16.54	15.83	17.02	15.93	16.02	734	641	824	622	621	405	659	367	419	574	471	528	424	350	387	488	591	630	453	554	555	490	710	657
LOC105222873	13.24	12.32	14	12.94	14.29	10.2	9.93	11.28	9.6	9.18	10.67	10.66	10.62	8.82	10.56	11.48	11.51	12.22	11.04	10.34	13.65	10.68	12.94	12.52	10.85	397	312	420	339	366	241	316	239	230	251	243	293	219	159	219	248	319	326	230	243	313	226	369	353
LOC105222874	9.99	8.72	9.23	8.03	7.97	5.57	10.33	6.36	6.02	5.27	9.15	8.11	7.14	7.13	7.45	10.98	13.73	10.53	12.68	13.14	11.66	14.59	14.94	14.7	16.19	289	213	267	203	197	127	317	130	139	139	201	215	142	124	149	229	367	271	255	298	258	298	411	400
LOC105222875	4.05	4.03	3.67	3.6	3.38	1.88	2.82	1.82	1.65	2.08	3.08	3.07	2.42	2.36	2.61	4.01	3.9	4.69	4.27	4.37	4.93	4.83	5.58	5.43	5.74	265	223	240	206	189	97	196	84	86	124	153	184	109	93	118	189	236	273	194	224	247	223	347	334
LOC105222876	17.31	17.32	18.64	16.41	17.34	26.24	31.01	27.5	26.39	25.71	25.91	26.09	26.16	22.56	23.44	24.65	28.11	23.19	27.16	28.12	23.81	26.5	25.42	26.34	27	1014	857	1092	840	868	1212	1928	1139	1235	1374	1153	1401	1054	795	950	1041	1522	1209	1106	1292	1067	1096	1416	1451
LOC105222877	0.9	0.67	0.68	0.81	0.43	1.58	0.72	1.04	1.1	0.53	0.97	1.39	0.94	1.36	1.18	1.25	1.34	0.98	0.85	1.08	0.74	1.12	1.19	0.78	1	32	20	24	25	13	44	27	26	31	17	26	45	23	29	29	32	44	31	21	30	20	28	40	26
LOC105222878	12.28	11.49	9.76	12.4	10.55	2.54	4.19	2.98	2.64	2.76	4.53	4.51	2.99	3.8	3.9	4.38	5	4.56	5.14	4.58	4.53	5.38	4.78	6.31	6.66	478	378	380	422	351	78	173	82	82	98	134	161	80	89	105	123	180	158	139	140	135	148	177	231
LOC105222879	15.19	17.29	13.48	13.91	15.03	17.1	20.59	18.69	21.93	23.36	26.93	26.9	27.71	29.82	32.97	34.84	34.76	34.63	37	40.11	37.53	44.04	38.38	38.76	40.32	730	702	648	584	617	648	1050	635	842	1024	983	1185	916	862	1096	1207	1544	1481	1236	1512	1380	1494	1754	1752
LOC105222880	32.08	33.55	30.58	35.28	32.2	61.25	51.24	52.05	59.63	59.35	56.87	48.66	47.4	57.14	55.85	54.42	54.54	59.37	53.97	51.52	49.8	54.48	50.7	53.16	46.65	542	479	517	521	465	816	919	622	805	915	730	754	551	581	653	663	852	893	634	683	644	650	815	845
LOC105222881	9.29	10.78	10.9	9.65	10.12	16.28	21.62	15.56	14.91	15.86	40.81	30.75	35.26	31.5	32.64	55.6	59.28	48.21	58.56	47.44	59.85	57.99	56.09	61.68	52.39	563	552	661	511	524	778	1391	667	722	877	1879	1709	1470	1149	1369	2430	3322	2601	2468	2256	2776	2482	3234	3517
LOC105222882	32.65	26	30.7	31.2	28.83	38.58	51.42	41.23	38.86	39.82	35.54	36.75	35.75	31.21	35.08	51.77	62.38	52.25	52.88	55.67	61.26	58.63	69.2	70.46	74.25	1229	803	1133	1015	907	1098	1988	1065	1124	1309	957	1200	881	667	865	1333	2065	1663	1323	1564	1658	1476	2338	2363
LOC105222883	8.03	8.38	8.68	8.13	8.5	8.99	8.64	8.76	7.95	6.4	10.03	9.1	9.43	10.54	10.86	9.05	8.2	7.76	8.46	6.79	7.6	9.85	8.29	7.31	8.76	135	120	147	120	123	119	155	105	107	99	130	141	110	107	127	111	128.88	116.91	99	90	98	118	132.91	116
LOC105222884	19.51	21.15	20.5	22.4	18.59	20.2	19.48	21.67	19.96	19.15	17.67	21.76	14.69	18.07	16.83	16.64	15.88	14.34	16.73	14.13	13.2	14.41	11.61	15.99	13.78	278	256	293	279	227	227	296	219	228	249	192	286	144	155	166	171	211.12	183.09	167	158	144	145	158.09	215
LOC105222885	5.61	5.46	4.22	5.62	4.01	6.36	5.47	7.16	8.89	8	7.58	8.66	7.22	8.75	7.82	8.06	6.82	5.52	5.43	9.11	8.3	7.52	8.87	6.39	6.91	113	93	85	99	69	101	117	102	143	147	116	160	100	106	109	117	127	99	76	144	128	107	170	121
LOC105222886	0	0	0	0	0	0	0	0	0	0	0	0	0	0	0	0	0	0	0	0	0	0	0	0	0	0	0	0	0	0	0	0	0	0	0	0	0	0	0	0	0	0	0	0	0	0	0	0	0
LOC105222888	8.46	8.26	7.93	7.38	5.82	8.59	5.88	10.32	9	6.49	8.08	4.62	8.92	7.56	8.1	5.43	7.32	7.37	5.17	5.66	6.22	6.44	4.45	6.75	4.28	80	66	75	61	47	64	59	69	68	56	58	40	58	43	53	37	64	62	34	42	45	43	40	60
LOC105222889	17.42	14.98	15.46	14.64	16.35	9.73	14.65	10.11	11.19	12.65	10.49	12.61	9.05	9.48	11.99	17.68	18.52	18.18	18.46	22.94	26.39	28.44	23.13	26.16	27.31	845	615	748	619	680	371	755	347	435	563	388	561	302	276	400	619	835	784	622	876	984	973	1069	1194
LOC105222890	24.92	20.04	23.21	21.88	21.64	33.26	38.35	28.69	29.88	28	22.64	26.14	21.33	21.83	26.55	33.98	35.48	31.05	34.32	40.18	39.58	41.81	34.97	38.33	42.68	1870	1271	1743	1435	1388	1968	3055	1523	1792	1917	1291	1799	1101	986	1379	1839	2462	2074	1791	2366	2273	2216	2497	2706
LOC105222891	0.38	0.56	0.26	0.48	0.81	0.4	0.2	0.6	0.33	0.86	0.42	0.51	0.46	0.26	0.38	1.44	0.97	1.25	0.4	1.08	1.61	1.8	1.02	1.18	1.54	7.09	9	5	8	13	6	4	8	5	14.76	6	8.9	6	3	5	19.66	17	20.97	5.27	16	23.29	24.07	18.31	21.01
LOC105222892	41.82	31.35	34.37	32.9	32.3	41.23	63.37	44.48	44.74	44.28	45.15	56.87	50.72	38.17	52.1	101.91	105.11	100.71	101.74	132.86	161.32	165.51	165.04	181.09	200.29	2620	1609	2091	1789	1672	1921	3983	1875	2145	2382	1954	3018	1996	1284	2052	4231	5653	5163	4075	6086	7218	6779	9010	9801
LOC105222893	11.24	12.17	11.39	10.21	12.43	13.94	14.08	12.22	13.18	13.06	14.79	15.62	11.94	14.98	15.57	18.33	16.56	14.74	17.41	18.73	17.11	20.94	22.62	18.61	19.42	364	333	369	289	344	356	484	280	341	386	364	464	266	292	349	428	496	425	392	476	424	479	697	567
LOC105222894	20.27	20.93	23.57	23.06	21.93	11.33	14.59	9.91	10.4	9.5	13.16	16.2	11.49	11.56	15.04	25.96	21.18	22.74	19.38	25.48	22.61	29.24	23.56	27.03	24.68	746	651	868	742	690	329	570	258	306	319	368	547	291	256	383	689	721	745	496	736	637	760	825	936
LOC105222895	33.71	34.67	36.76	41.07	30.95	22.24	24.67	22.63	19.85	18.7	23.84	23.42	21.58	22.11	22.36	27.49	28.1	28.71	33.13	27.03	29.63	34.47	33.71	33.84	35.52	2689	2334	2929	2858	2105	1397	2086	1274	1265	1358	1445	1709	1184	1059	1233	1578	2071	2037	1834	1690	1808	1939	2559	2536
LOC105222896	11.15	11.21	9.07	11.29	11.05	4.82	4.03	4.45	5.15	3.95	6.27	5.72	4.74	6.5	4.8	6.1	8.16	6.56	5.92	7.85	6.34	6.55	7.25	7.42	8.65	393	334	320	348	333	134	151	111	145	127	168	185	115	138	117	155	266	206	145	217	171	163	243	246
LOC105222897	0.29	0.72	0.37	0.28	0.27	0.22	0.29	0.39	0.05	0.27	0.21	0.11	0.25	0.22	0.28	0.34	0.14	0.08	0.33	0.41	0.22	0.29	0.31	0.27	0.22	29	60	37	24	23	17	30	27	4	24	16	10	17	13	19	24	13	7	23	32	17	20	29	25
LOC105222898	25.99	29.31	26.33	25.89	19.6	16.22	19	18.41	15.26	16.13	7.58	9.25	9.28	8.15	7.88	6.61	4.63	5.87	8.52	6.66	6.44	6.31	6.35	7.41	7.32	1798	1714	1819	1558	1157	894	1415	907	840	1019	403	596	440	350	375	336	304	369	418	363	350	318	422	478
LOC105222899	26.39	26.61	27.66	24.34	24.33	27.3	27.84	29.35	31.18	29.28	32.07	30.18	29.1	32.35	30.37	33.12	35.34	33.53	34.88	35.56	39.77	34.5	33.85	34.66	34.45	717	611	752	578	565	585	803	564	677	726	662	752	544	529	571	649	888	811	659	758	827	662	875	886
LOC105222900	39.37	40.95	37.28	34.93	37.24	29.73	28.13	28.62	27.77	30.24	28.26	28.32	30	30.03	25.93	30.49	33.09	37.19	32.46	37.26	30.24	27.9	34.42	33.48	28.98	4278	3761	4054	3318	3459	2548	3245	2200	2411	2998	2333	2822	2243	1964	1950	2389	3325	3598	2453	3177	2515	2141	3559	3423
LOC105222901	20.05	19.6	20.12	21.87	20.91	11.56	10.97	9.54	10.94	11.88	16.41	15.63	17.21	15.17	15.72	19.74	19.14	16.85	19.06	21.59	17.37	16.47	20.35	18.61	18.06	2466	2040	2469	2348	2196	1115	1416	816	1062	1309	1519	1739	1435	1111	1319	1716	2137	1812	1604	2035	1606	1392	2326	2112
LOC105222902	744.25	588.72	499.31	660.68	496.07	653.09	510.67	522.91	687.21	619.83	521.44	535.27	453.4	537.23	615.64	444.7	450.93	441.8	433.71	395.81	414.78	388.31	438.4	395.8	426.75	6476	4329	4347	5025	3689	4481	4717	3218	4778	4921	3447	4271	2714	2813	3707	2790	3628	3422	2624	2702	2762	2386	3629	3240
LOC105222903	30.95	30.9	27.09	31.51	22.95	26.74	22.2	24.78	25.63	23.6	28.23	22.55	24.44	26.65	19.88	24.68	21.95	22.11	27.26	23.44	22.15	18.49	22.16	18.83	20.21	663	561	581	590	422	452	507	377	439	464	464	446	362	345	296	382	437	425	408	395	366	281	453	380
LOC105222904	19.27	19.17	17.79	27.17	18.9	31.97	27.6	23.23	21.9	26.11	25.83	22.25	23.79	25.71	25.19	27.86	25.47	29.37	24.8	23.46	17.99	31.75	32.74	29.08	31.89	506	429	470	631	427	667	778	436	464	634	519	541	437	411	464	539	623	699	459	490	366	603	838	733
LOC105222905	0.66	0	0.44	0	0.78	0.56	0.21	0.31	0.55	0.49	1.46	0.48	1.93	0.37	0.96	0.92	0	0.5	0.32	0.28	0.58	0.63	1.16	0.71	1.4	3	0	2	0	3	2	1	1	2	2	5	2	6	1	3	3	0	2	1	1	2	2	5	3
LOC105222905_1	58.3	63.75	66.5	59.76	58.21	67.03	59.31	67.04	67.81	59.72	73.57	76.55	69.38	74.41	78.07	71.26	77.76	80.6	78.26	79.46	77.91	80.14	70.03	80.81	72.68	750	693	856	672	640	680	810	610	697	701	719	903	614	576	695	661	925	923	700	802	767	728	857	978
LOC105222906	26.66	22.35	23.35	30.37	27.45	71.13	57.91	54.4	59.93	57.94	59.79	39.97	45.74	52.75	44.95	52.71	40.04	48.22	49.32	39.89	44.55	49.92	50.3	48.66	57.08	716	517	650	728	648	1530	1669	1052	1295	1446	1215	1002	860	850	855	1034	1005	1166	939	865	929	957	1307	1254
LOC105222907	0	0	0	0	0	0	0	0	0	0	0	0	0	0	0	0	0	0	0	0	0	0	0	0	0	0	0	0	0	0	0	0	0	0	0	0	0	0	0	0	0	0	0	0	0	0	0	0	0
LOC105222908	0	0	0	0	0	0	0.01	0	0	0.01	0	0	0	0	0.04	0	0	0	0.02	0	0	0	0	0	0	0	0	0	0	0	0	1	0	0	1	0	0	0	0	2	0	0	0	1	0	0	0	0	0
LOC105222909	0.1	0	0.1	0.17	0.24	0.7	0	0.14	0.4	0.4	0.47	0.45	0.15	0.25	0.44	0.65	1.29	1.41	0.87	0.9	1.65	1.43	1.64	1.76	2.57	2	0	2	3	4	11	0	2	6.29	7.24	7	8.1	2	3	6	9.25	23.61	24.87	12	14	25.02	20.04	30.93	32.88
LOC105222910	5.32	6.72	5.23	5.94	5.38	6.21	5.96	5.28	6.34	6.13	5.61	5.52	7.12	6.21	5.76	6.29	6.18	6.54	7.25	5.73	6.87	7.77	7.85	7.65	6.99	252	269	248	246	218	232	300	177	240	265	202	240	232	177	189	215	271	276	239	213	249	260	354	341
LOC105222911	0.61	0.53	0.46	0.55	0.47	0.26	0.48	0.49	0.45	0.46	0.54	0.43	0.43	0.46	0.35	0.52	0.53	0.57	0.74	0.57	0.47	0.48	0.56	0.83	0.6	90	67	68	71	60	31	76	51	53	63	61	58	44	41	36	56	73	76	76	67	53	50	79	116
LOC105222912	0	0	0	0	0	0	0	0	0	0	0	0	0	0	0	0	0	0	0	0	0	0	0	0	0	0	0	0	0	0	0	0	0	0	0	0	0	0	0	0	0	0	0	0	0	0	0	0	0
LOC105222913	3.5	2.57	2.49	2.97	2.84	4.36	6.07	3.36	3.45	3.66	3.82	2.04	1.53	2.33	3.07	4.3	4.45	4.27	2.85	3.05	2.1	2.61	3.38	2.73	3.23	222	138	158	165	154	218	409	151	175	212	184	119	67	89	135	197	261	241	126	152	102	117	204	163
LOC105222914	1.68	1.66	2.12	2.1	1.64	3.06	3.46	3.12	3.44	3.75	3.08	3.04	3.06	3.49	2.91	3.07	2.71	3.3	2.93	3.46	3.21	3.25	2.66	3.11	3.46	318	266	400	347	265	458	706	418	519	649	442	527	397	397	381	420	474	556	387	515	467	432	483	553
LOC105222915	22.15	22.84	22.44	25.09	21.52	31.92	31.12	26.31	34.04	31.71	29.16	23.5	23.41	24.18	28.45	26.35	25.31	26.97	26.76	25.76	23.7	24.76	28.68	28.36	27.75	513	447	520	508	426	583	765	431	630	670	513	499	373	337	456	440	542	556	431	468	420	405	632	618
LOC105222916	18.13	16.71	16.19	16.42	18.04	13.36	15.38	14.71	17.57	16.11	14.69	15.02	15.6	17.44	16.25	15.77	12.42	14.76	12.25	13.45	12.19	13.19	10.69	14.43	12.52	440	343	395	345	372	257	401	253	341	357	270	335	256	257	272	276	275	321	209	259	227	230	244	329
LOC105222917	18.64	20	19.74	19.43	20.31	12.51	13.91	12.37	11.7	12.96	14.52	11.16	12.76	10.8	13.8	15.3	14.67	14.5	16.89	15.04	16.72	15.34	17.23	17.24	17.2	654	593	693	596	609	346	518	307	328	415	387	359	308	228	335	387	476	453	412	414	449	380	575	569
LOC105222918	9.67	12.33	11.24	10.54	11.02	14.51	18.02	17.13	18.35	19.07	19.21	17.77	18.17	20.16	21.64	20.27	16.41	20.36	18.77	22.5	22.17	20.76	17.17	18.69	20.12	398.81	429.73	463.98	379.97	388.46	472.04	789.08	499.93	604.92	717.88	602.24	672.37	515.7	500.45	617.85	603.09	626.02	747.89	538.38	728.13	699.87	604.87	673.98	725.47
LOC105222919	10.74	6.74	10.36	8.97	9.62	4.97	5.72	4.23	7.36	4.71	6.27	10.29	6.11	4.35	5.67	8.94	9.09	10.18	11.15	12.74	9.64	11.64	10.9	10.32	13.71	115	61	111	84	88	42	65	32	63	46	51	101	45	28	42	69	90	97	83	107	79	88	111	104
LOC105222920	0.88	0.78	0.54	1.07	0.81	2.33	1.84	1.28	2.06	1.83	3.19	3.57	2.6	2.47	2.95	5.13	4.31	4.83	4.34	3.82	4.96	4.97	5.91	4.46	5.75	31.19	23.27	19.02	33.03	24.54	64.96	68.92	32.07	58.08	59.12	85.76	115.63	63.3	52.55	72.15	130.91	140.98	152.11	106.62	105.87	134.13	124.13	199.02	148.53
LOC105222921	20.67	20.01	19.74	20.08	21.28	13.89	17.67	13.99	17.31	16.55	25.67	25.83	21.29	23.63	25.36	29.55	29.53	26.73	29.93	31.5	30.86	31.08	36.41	34.07	34.94	583	477	557	495	513	309	529	279	390	426	550	668	413	401	495	601	770	671	587	697	666	619	977	904
LOC105222922	40.01	38.33	37.33	38.09	41.08	42.96	48.03	43.44	45.4	45.49	50.56	50.99	50.07	51.77	51.94	59.93	56.2	56.04	59.51	64.05	60.07	65.62	62.37	61.5	62.01	3717	3017	3480	3117	3275	3158	4761	2865	3362	3873	3575	4352	3212	2880	3329	4044	4837	4670	3865	4699	4274	4321	5520	5365
LOC105222923	1.66	0.9	1.66	1.52	1	1.8	1.12	0.87	0.71	0.88	1.56	2.28	0.97	1.02	1.23	1.05	1.39	1.49	1.16	1.81	2.48	2.35	1.1	0.71	1.38	35	16	35	28	18	30	25	13	12	17	25	44	14	13	18	16	27	28	17	30	40	35	22	14
LOC105222924	0	0	0.14	0.15	0	0	0	0	0	0	0.06	0	0	0	0	0	0.05	0	0	0	0	0.13	0	0	0	0	0	3	3	0	0	0	0	0	0	1	0	0	0	0	0	1	0	0	0	0	2	0	0
LOC105222925	22.3	28.04	25.65	24.45	22.81	13.8	13.23	12.96	11.84	11.64	12.7	14.5	13.61	14.38	13.53	17.41	17.32	13.6	17.64	16.09	15.27	15.27	14.79	15.89	16.09	691	734	795	662	604	337	435	284	293	329	299	412	290	268	290	389	496	375	380	391	362	334	436	463
LOC105222926	1010.41	1089.85	1030.28	1208.29	1041.33	1558.34	1905.99	1624.93	1468.55	1154.78	2608.77	2461.66	2766.53	2533.38	2188.63	2613.09	2744.56	2657.91	2342.6	2296.25	2267.21	2440.02	2513.37	2619.84	2335.9	49501	45150	50521	51695	43608	60022	98750	56127	57307	51482	96691	110137	92863	74384	73891	91883	123761	115365	79446	87873	84598	84027	116608	120183
LOC105222927	78.67	76.87	73.52	75.64	78.08	56.06	62.4	58.55	65.79	62.87	73.37	71.54	65.42	68.39	74.98	82.04	70.53	80.14	85.89	89.64	90.77	87.76	86.48	80.96	86.59	1549	1287	1450	1315	1319	876	1303	820	1040	1126	1100	1286	889	814	1027	1167	1292	1407	1182	1391	1369	1225	1615	1498
LOC105222928	36.79	38.71	38.15	37.9	39.79	30.01	30.66	29.17	28.8	29.61	33.06	32.39	36.29	32.96	30.71	39.91	38.6	39.58	41.71	44.26	42.58	44.88	46.04	47.68	46.64	1942	1727	2015	1749	1795	1249	1718	1089	1215	1426	1326	1568	1318	1047	1122	1519	1884	1860	1531	1833	1720	1673	2312	2368
LOC105222929	47.72	52.02	48.79	53.57	47.36	77.15	74.42	75.06	76.99	76.66	74.86	66.42	69.86	80.03	70.64	63.27	69.82	77.22	64.87	63.28	68.37	67.86	76.1	71.19	66.84	2033	1874	2080	1999	1722	2607	3387	2276	2636	3001	2435	2611	2057	2062	2095	1955	2766	2949	1934	2128	2243	2050	3100	2870
LOC105222930	1988.16	2025.02	2037.59	1779.61	1818.35	632.37	616.74	564.98	561.43	584.54	544.25	550.8	587.44	565.33	555.83	717.78	674.2	634.56	663.25	613.74	632.55	692.88	710.22	792.89	741.21	41646	35846	42704	32584	32552	10445	13714	8370	9397	11172	8661	10580	8465	7126	8057	10841	13058	11832	9660	10086	10140	10249	14153	15625
LOC105222931	1.74	0.59	0.5	2.7	1.16	0.47	0.7	0.7	0.93	1.5	3.1	0.95	0.72	2.06	0.36	0	1.74	1.53	1.43	1.74	1.94	1.05	1.04	0.4	2.35	14	4	4	19	8	3	6	4	6	11	19	7	4	10	2	0	13	11	8	11	12	6	8	3
LOC105222932	168.71	183.77	137.88	155.86	126.24	270.24	211.3	247.69	254.89	274.72	268.27	235.53	232.15	267.22	270.75	238.57	239.25	251.45	201.38	220.66	199.87	191.08	238.1	210.34	231.56	2452	2257	2005	1980	1568	3097	3260	2546	2960	3643	2962	3139	2321	2337	2723	2500	3215	3253	2035	2516	2223	1961	3292	2876
LOC105222933	9.35	9.16	6.25	8.72	7.32	41.71	32.56	32.23	68.36	42.83	61.47	39.71	36.37	68.75	59.52	54.11	39.12	59.98	44.8	43.66	55.19	59.11	59.83	45.36	53.13	151	125	101	123	101	531	558	368	882	631	754	588	404	668	665	630	584	862	503	553	682	674	919	689
LOC105222934	0.85	0.34	0.43	0.65	0.5	0	0.94	0.8	0	0.31	2.05	0.46	0.21	0.47	0	1.57	0	0	0	0	0.19	0.2	0.45	0.3	0.36	6	2	3	4	3	0	7	4	0	2	11	3	1	2	0	8	0	0	0	0	1	1	3	2
LOC105222935	7.76	4.82	5.62	4.21	6.47	4.92	6.76	4.25	5.1	5.1	8.55	5.82	8.03	5.96	8.27	8.34	7.13	10.02	7.95	5.19	4.69	3.84	7.03	6.9	7.73	80	42	58	38	57	40	74	31	42	48	67	55	57	37	59	62	68	92	57	42	37	28	69	67
LOC105222936	0.27	0.55	0.4	0.27	0.55	0.51	0.53	0.47	0.29	0.44	0.39	0.22	0.34	0.44	0.48	0.83	0.54	0.79	1.01	0.98	0.96	0.33	0.77	1.06	0.88	8	14	12	7	14	12	17	10	7	12	9	6	7	8	10	18	15	21	21	23	22	7	22	30
LOC105222937	5.71	3.99	0.92	7.08	2.91	4.15	1.47	2.41	2.95	1.83	4.28	3	2.1	6.53	3.81	1.82	2.55	3.8	0.94	2.34	2.21	0.76	1.79	1.53	2.6	43.61	25.71	7	47.26	19	25	11.9	13	18	12.72	24.8	21	11	30	20.1	10	18	25.79	5	14	12.91	4.09	13	11
LOC105222938	0.99	0.29	0.62	1.13	0.87	0.16	0.47	0.17	0.15	0.14	0.49	0.4	0.36	1.03	0.18	0.34	0.13	0.69	0	0.95	0.32	0.18	0.26	0	0.78	8	2	5	8	6	1	4	1	1	1	3	3	2	5	1	2	1	5	0	6	2	1	2	0
LOC105222940	0	0.08	0	0	0	0.09	0	0	0	0	0	0	0	0	0	0	0	0	0	0	0	0	0	0	0	0	1	0	0	0	1	0	0	0	0	0	0	0	0	0	0	0	0	0	0	0	0	0	0
LOC105222941	0	0	0	0	0	0	0	0	0	0	0	0	0	0	0	0	0	0	0	0	0	0.11	0	0	0	0	0	0	0	0	0	0	0	0	0	0	0	0	0	0	0	0	0	0	0	0	1	0	0
LOC105222942	0	0	0	0	0	0	0	0	0	0	0	0	0	0	0	0	0	0	0	0	0	0	0	0	0	0	0	0	0	0	0	0	0	0	0	0	0	0	0	0	0	0	0	0	0	0	0	0	0
LOC105222943	24.96	26.78	22.47	26.96	26.03	28.31	29.21	30.9	31.72	28.71	31.12	24.34	27.38	25.37	27.11	24.29	24.73	21.77	25.3	18.38	21.47	22.39	23.87	21.59	21.87	322	292	290	304	287	288	400	282	327	338	305	288	243	197	242	226	295	250	227	186	212	204	293	262
LOC105222944	2.82	3.68	0.83	2.33	2.67	0.25	0.09	0.14	0.61	0.69	0.19	0.11	0.07	0.08	0.07	0.13	0.32	0.16	0.21	0.19	0.32	0.14	0.2	0.31	0.12	58	64	17	42	47	4	2	2	10	13	3	2	1	1	1	2	6	3	3	3	5	2	4	6
LOC105222945	3.69	3.84	5.03	5.35	3.54	10.52	12.25	11.15	12.3	11.82	9.77	8.9	8.1	9.44	8.21	8.53	8.77	10.05	8.72	8.39	9.83	9.66	9.81	9.53	10.72	127	112	173	161	104	286	448	272	339	372	256	281	192	195	196	212	279	308	209	227	259	235	322	309
LOC105222946	2.72	2.82	2.42	2.8	2.59	2.14	2.64	1.92	2.06	2.01	2.52	2.33	1.59	1.54	2.47	4.45	4.18	3.89	4.13	4.74	4.36	3.98	4.42	4.39	4.73	548	480	487	494	446	340	565	273	332	369	385	431	221	187	345	646	778	697	578	750	672	567	847	832
LOC105222947	0.03	0	0	0.03	0.03	0	0	0.04	0	0	0	0.03	0.04	0	0	0	0	0.03	0	0.1	0	0	0	0.03	0	1	0	0	1	1	0	0	1	0	0	0	1	1	0	0	0	0	1	0	3	0	0	0	1
LOC105222948	2.88	1.97	3.34	2.43	2.04	1.54	2.14	21.13	37.4	7.07	32.75	44.83	24.04	49.29	70.59	9.57	11.24	26.08	12.65	35.29	46.78	34.05	13.48	43.14	17.18	38	22	44	28	23	16	30	197	394	85	328	542	218	391	644	91	137	306	116	365	472	317	169	535
LOC105222949	13.52	9.32	11.28	8.16	7.99	7.72	5.6	6.09	9.48	8.14	7.82	9.23	6.48	10.12	8.59	8.65	9.8	5.84	6.2	4.35	5.05	5.68	9.84	8.68	10.52	91	53	76	48	46	41	40	29	51	50	40	57	30	41	40	42	61	35	29	23	26	27	63	55
LOC105222950	3.06	3.11	3.31	3.3	3.08	1.03	1.55	1.39	1.49	1.25	2.3	2.43	1.98	1.89	2.23	3.01	3.39	4.17	3.56	3.87	5.02	4.47	4.62	4.78	4.92	121	104	131	114	104	32	65	39	47	45	69	88	54	45	61	86	124	147	98	120	152	125	174	178
LOC105222951	1.86	1.91	2.03	1.76	2.27	1.23	1.48	1.28	1	1.27	1.46	1.81	1.75	0.92	2.21	2.72	2.83	2.22	2.48	3.4	3.66	2.75	2.97	3.35	3.01	81	70	88	67	84	42	68	39	35	50	48	72	52	24	66	85	113	85	75	115	121	84	122	137
LOC105222952	14.93	14.93	15.12	14.31	14.53	4.91	8.02	5.25	5.39	6.5	9.6	9.86	7.15	7.79	8.54	15.58	12.94	13.41	13.52	17.04	16.16	16.17	13.43	16.78	16.19	659	557	668	552	548	171	376	164	190	262	322	399	217	207	261	496	528	527	415	590	546	504	564	697
LOC105222953	6.48	4.77	4.58	4.43	5.18	1.77	4.24	1.83	1.96	3.08	2.18	3.09	1.68	1.28	2.33	5.91	5.96	5.7	6.02	8.86	11.24	9.62	9.34	10.89	11.61	455	283	322	272	311	98	316	91	110	197	116	199	81	54	113	299	387	356	294	488	604	477	624	719
LOC105222954	0.2	0.27	0.29	0.26	0.09	0.34	0.33	0.19	0.25	0.3	0.38	0.31	0.26	0.2	0.31	0.44	0.47	0.53	0.54	0.71	0.77	1.01	0.73	0.72	1.01	13	15	19	15	5	18	23	9	13	18	19	19	12	8	14	21	29	31	25	37	39	47	46	45
LOC105222955	21.98	23.07	20.37	20.75	21.92	12.18	14.37	10.47	13.23	11.72	13.02	13.93	15.54	15.37	13.48	14.94	13.94	15.34	13.47	17.71	14.28	14.91	13.55	14.64	17.93	549	487	509	453	468	240	381	185	264	267	247	319	267	231	233	269	322	341	234	347	273	263	322	344
LOC105222956	1.63	0.81	1.91	1.66	1.46	1.87	0.38	0.5	1.31	2.39	1.38	1.32	0.73	0.78	1.19	1.71	1.41	2.97	0.53	1.96	1.44	2.08	1.04	3.37	2.19	19	8	19	22	14	17	5	4	14	28	10	12	6	5	11	15	14	30	4	18	12	16	14	35
LOC105222957	0	0	0	0	0	0.15	0	0.05	0	0.04	0	0	0	0	0.11	0.05	0.04	0	0	0	0	0	0	0	0	0	0	0	0	0	3	0	1	0	1	0	0	0	0	2	1	1	0	0	0	0	0	0	0
LOC105222958	36.41	37.66	35.39	33.32	32.82	20.05	25.47	22.34	24.34	25.6	26.59	29.27	25.68	26.17	28.54	32.22	32.7	30.02	29.83	34.47	30.71	31.87	32.64	31.45	36.16	1007	871	984	800	772	446	750	445	536	644	558	752	491	440	561	670	858	744	573	772	664	627	846	843
LOC105222959	31.34	29.37	32.25	31.96	30.53	38.76	30.39	34.59	34.79	32.33	29.03	29.62	33.81	31.58	34.94	27.14	31.83	29.79	27.33	30.82	26.69	30.13	28.92	28.79	32.48	442	350	455	394	368	431	455	345	392	416	311	383	328	268	341	276	415	374	268	341	288	300	388	382
LOC105222960	5951.51	6071.68	5868.91	5800.23	5493.7	5866.6	5308.68	6088.67	5493.76	5794.49	4651.79	4843.42	5245.94	5178.92	4574.03	4414.94	4512.07	4426.98	4369	4032.55	3756.25	3688.4	4764.8	4272.24	3916.38	148439	127973	146456	126451	117102	115378	140556	107403	109487	131865	88143	110776	90009	77729	78945	79396	104055	98286	75767	78906	71696	64962	113057	100245
LOC105222961	16.83	16.93	14.9	13.57	16.77	4.93	7.84	4.13	4.92	5.85	6.75	6.87	4.8	4.14	6.02	15.57	14.14	11.54	15.62	15.82	21.53	20.27	20.74	21.76	24.74	1141	879	989	765	908	246	523	209	272	351	318	394	192	161	282	747	804	664	594	760	1036	896	1059	1244
LOC105222962	12.09	10.22	9.05	10.5	10.92	3.77	6.17	3.82	5.37	7.51	6.4	6.6	5.23	4.86	7.25	10.66	9.17	10.09	10.26	12.88	13.79	14.45	14.01	15.45	15.28	851	608	637	646	657	209	461	190	302	482	342	426	253	206	353	541	597	632	502	711	743	718	938	1023
LOC105222963	0.03	0.1	0.03	0.07	0.05	0.08	0.1	0.09	0.16	0.07	0.03	0.13	0.06	0.07	0.04	0.09	0.22	0.06	0.24	0.22	0.16	0.08	0.13	0.18	0.11	1	4	1	2	2	3	5	3	6	3	1	5	2	2	1	3	7	2	8	8	5	2	6	8
LOC105222964	24.22	23.62	21.66	24.01	22.77	11.49	14.57	11.33	13.2	14.19	16.45	17.4	17.11	16.45	17.48	22.2	20.28	22.53	20.08	26.12	26.27	26.49	24.9	25.64	25.53	3347	2758	2995	2900	2689	1252	2137	1107	1457	1789	1727	2205	1627	1368	1672	2212	2591	2771	1929	2832	2778	2585	3273	3334
LOC105222965	104.08	95.85	101.85	87.4	100.37	42.51	47.8	34.3	38.64	47.67	42	42.64	41.07	42.73	43.73	48.93	52.12	49.57	49.44	55.66	40.49	41.06	44.57	44.63	47.22	13365	10406	13101	9808	11023	4312	6518	3120	3970	5592	4100	5023	3634	3301	3888	4533	6192	5671	4425	5607	3984	3722	5445	5394
LOC105222966	23.2	22.21	22.89	22.34	22.78	17.93	17.68	15.28	13.36	13.91	14.85	13.28	14.44	13.45	13.8	19.43	18.39	20.52	18.28	20.47	22.15	19.3	22.39	21.18	20.87	2352	1894	2296	1946	1955	1366	1810	1078	1022	1253	1095	1206	981	780	932	1361	1675	1756	1244	1570	1641	1362	2081	1950
LOC105222967	0.55	0.21	0.64	0.54	0.27	0.29	0.56	0.46	0.59	0.56	0.51	0.77	0.24	0.35	0.78	0.58	0.6	0.77	0.85	1.09	1.19	1.46	0.99	1.21	1.66	30	10	35	27	12	13	34	18	27	28	22	39	9	12	31	24	32	38	34	49	52	57	54	65
LOC105222968	0.07	0	0.1	0.03	0.11	0.12	0.16	0.1	0.09	0.1	0.19	0	0.17	0	0.14	0.2	0.23	0.08	0.24	0.06	0.28	0.37	0.35	0.38	0.24	3	0	4	1	4	4	7	3	3	4	6	0	5	0	4	6	9	3	7	2	9	11	14	15
LOC105222969	0.17	0.1	0.24	0.16	0.13	0.22	0.21	0.24	0.2	0.63	0	0.06	0.08	0.24	0.08	0.18	0.23	0.13	0.1	0.18	0.11	0.04	0.07	0.06	0.07	12	6	17	10	8	12	16	12	11	40	0	4	4	10	4	9	15	8	5	10	6	2	5	4
LOC105222970	0.06	0.08	0	0	0.04	0.04	0.21	0.05	0.08	0.03	0.04	0.07	0	0.05	0.05	0.09	0	0.04	0.14	0.16	0	0.05	0	0.03	0.04	2	2	0	0	1	1	7	1	2	1	1	2	0	1	1	2	0	1	3	4	0	1	0	1
LOC105222971	0	0.04	0	0.04	0	0.05	0.24	0.1	0.05	0.35	0	0.12	0.1	0	0.31	0	0.04	0	0.16	0	0.05	0	0	0.08	0	0	1	0	1	0	1	7	2	1	9	0	3	2	0	6	0	1	0	3	0	1	0	0	2
LOC105222972	0	0	0	0	0	0	0	0	0	0	0	0	0	0	0	0	0	0	0	0	0	0	0	0	0	0	0	0	0	0	0	0	0	0	0	0	0	0	0	0	0	0	0	0	0	0	0	0	0
LOC105222974	0	0	0	0	0	0	0	0	0	0	0	0	0	0	0	0	0.03	0	0.11	0	0	0	0.05	0.06	0.03	0	0	0	0	0	0	0	0	0	0	0	0	0	0	0	0	1	0	3	0	0	0	2	2
LOC105222975	31.76	29.77	29.52	32.76	33.19	10.21	10.19	9.39	11.39	11.05	10.18	9.67	11.41	9.74	9.09	10.29	8.07	8.65	9.66	9.56	7.91	9.29	10.84	9.59	8.85	813	644	756	733	726	206	277	170	233	258	198	227	201	150	161	190	191	197	172	192	155	168	264	231
LOC105222976	14.64	13.68	13.5	13.27	13.12	7.55	8.43	8.04	8.72	10.15	7.22	8.02	8.54	9.38	10.63	8.75	6.57	8.7	9.01	8.53	10.43	7.33	9.21	9.85	8.67	376	297	347	298	288	153	230	146	179	238	141	189	151	145	189	162	156	199	161	172	205	133	225	238
LOC105222977	479.95	483.79	484.16	509.82	469.76	69.64	61.09	64.79	52.54	62.37	31.71	40.64	39.66	40.51	33.43	24.08	29.46	26.52	29.71	26.07	23.35	20.44	27.48	24.94	25.67	23608	20110	23828	21920	19748	2701	3190	2254	2065	2799	1185	1833	1342	1199	1138	854	1340	1161	1016	1006	879	710	1286	1154
LOC105222978	1275.92	1162.86	1058.5	1171.83	1009.3	1079.95	862.41	919.62	1072.75	1044.61	836.39	894.62	813.1	824.14	951.53	744.8	780.61	875.1	713.4	740.01	695.87	629.67	797.07	763.42	815.52	12514	9638	10387	10046	8460	8352	8979	6379	8407	9348	6232	8046	5486	4864	6458	5267	7079	7640	4865	5694	5223	4361	7437	7044
LOC105222979	13.57	11.13	15.01	12.23	11.44	18.63	20.79	18.36	19.99	18.92	19.9	18.88	16.23	17.85	19.07	18.16	16.18	17.71	19.67	18.73	17.46	19.37	18.65	16.87	18.05	254	176	281	200	183	275	413	243	299	323	283	324	209	201	247	245	280	295	256	275	250	256	332	297
LOC105222980	6.48	2.56	4.32	5.8	4.17	1.31	1.33	1.06	1.53	1.95	0.37	1.54	0.82	3.59	0.68	0.26	0.61	1.37	0.68	0.6	3.56	0.4	3.16	1.1	0.36	69	23	46	54	38	11	15	8	13	19	3	15	6	23	5	2	6	13	5	5	29	3	32	11
LOC105222981	0.37	0.22	0.37	0	0	2.32	0.69	0	1.38	1.61	5.55	5.6	4	8.53	9.27	3.81	5.55	4.73	7.12	8.41	3.83	1.56	3.85	1.36	4.17	2	1	2	0	0	10	4	0	6	8	23	28	15	28	35	15	28	23	27	36	16	6	20	7
LOC105222982	0	0	0	0	0	0	0	0	0	0	0	0	0	0	0	0	0	0	0	0	0	0	0	0	0	0	0	0	0	0	0	0	0	0	0	0	0	0	0	0	0	0	0	0	0	0	0	0	0
LOC105222983	11.19	10.4	9.77	8.43	10.58	3.3	6.98	4.94	4.21	4.65	6.29	6.62	5.88	4.89	5.83	8.08	9.33	8.42	8.71	9.05	10.61	10.76	10.68	10.39	11.78	791	621	691	521	639	184	524	247	238	300	338	429	286	208	285	412	610	530	428	502	574	537	718	691
LOC105222984	9.53	11.79	12.53	13.56	8.74	8.82	8.09	9.23	9.24	8	8.59	10.77	8.11	10.27	7.57	6.79	5.85	8.39	7.16	8.43	8.86	9.85	8.67	8.12	7.39	111	116	146	138	87	81	100	76	86	85	76	115	65	72	61	57	63	87	58	77	79	81	96	89
LOC105222985	5.01	3.91	4.34	5.07	4.16	1.9	2	1.99	1.91	2.07	3.74	3.15	2.38	2.76	3.17	5.92	4.39	5.26	4.88	5.41	5.91	5.92	6.43	5.28	6.63	217	143	188	192	154	65	92	61	66	82	123	125	71	72	95	185	176	203	147	184	196	181	265	215
LOC105222986	0.23	0.27	0.17	0.08	0.21	0.18	0.4	0.29	0.33	0.49	0.38	0.35	0.1	0.14	0.4	0.08	0.1	0.05	0.12	0.14	0.03	0.07	0.01	0.04	0.11	19	19	14	6	15	12	35	17	22	37	24	27	6	7	23	5	8	4	7	9	2	4	1	3
LOC105222987	20.71	19.06	17.04	19.88	19.57	7.44	7.57	6.71	7.34	8.49	7.67	8.69	6.74	8.48	8.95	9.39	7.48	7.73	8.33	11.49	10.45	10.46	9.74	8.85	9.66	572	445	471	480	462	162	222	131	162	214	161	220	128	141	171	187	191	190	160	249	221	204	256	230
LOC105222988	31.68	35.12	31.12	30.13	30.17	53.43	43.89	47.05	44.92	41.58	56.65	56.02	61.3	57.45	50.85	56	59.42	54.61	53.58	50.88	46.66	48.57	52.7	52.35	45.35	1392	1304	1368	1157	1133	1851	2047	1462	1577	1667	1891	2257	1853	1519	1546	1774	2414	2136	1637	1754	1569	1507	2203	2164
LOC105222989	0.17	0.23	0.23	0.27	0.27	0.33	0.36	0.17	0.26	0.25	0.2	0.28	0.13	0.29	0.29	0.67	0.55	0.35	0.68	0.59	0.58	0.52	0.43	0.47	0.65	25	28	33	34	34	38	56	17	30	33	22	37	13	25	29	70	73	45	68	67	64	53	59	64
LOC105222990	1706.26	1812.42	1769.37	1694.52	1659.6	1677.82	1581.53	1833.65	1571.22	1621.8	1475.58	1684.5	1628.31	1581.79	1461.09	1558.58	1646.23	1536.26	1589.9	1573.59	1512.84	1503.92	1918.88	1739	1718.42	59012	53030	61397	51306	49133	45576	57267	44800	43423	51126	37972	53360	38051	32855	34704	39050	52167	46617	37663	41921	39907	36137	61629	55465
LOC105222992	5.41	5.46	5.2	4.92	5.05	10.79	12.59	9.48	20.84	25.08	12.63	12.54	7.82	18.29	18.19	12.02	5.3	10.04	9.78	13.51	16.59	17.01	10.27	13.39	14.8	498	425	479	396	397	783	1230	617	1533	2107	883	1059	495	1013	1159	798	451	823	626	976	1169	1106	899	1160
LOC105222993	10.05	9.12	9.72	9.8	9.89	10.53	10.71	9.08	10.6	9.44	9.7	9.96	9.2	8.4	8.67	12.93	12.39	10.82	12.07	13.41	10.97	10.02	10.47	11.38	10.44	1514	1161	1464	1290	1273	1250	1713	967	1276	1297	1110	1376	953	761	904	1404	1725	1451	1264	1584	1264	1066	1500	1612
LOC105222994	1.64	1.57	2.25	1.35	1.98	0	0	0	0	0	0	0	0	0	0	0	0	0	0	0.13	0	0	0	0	0	32	26	44	23	33	0	0	0	0	0	0	0	0	0	0	0	0	0	0	2	0	0	0	0
LOC105222995	19.2	24.32	22.47	19.57	24.12	20.89	19.63	21.62	19.91	22.23	23.42	23.4	22.41	20.94	20.35	22.62	23.25	20.43	28.02	21.55	25.73	22.15	25.71	24.01	25.19	454	484	531	406	489	385	487	358	371	478	415	503	359	294	325	380	501	425	453	395	456	364	567	528
LOC105222996	0.49	0.66	0.6	0.7	0.54	1.14	0.78	0.83	0.74	1.56	1.14	0.88	0.56	0.48	0.87	0.58	1.07	1.03	1.22	1.37	1.31	0.97	0.82	0.93	1.13	21	25	26	28	19	40	37	25	27	64	37	37	16	12	27	18	42	41	35	47	44	29	33	37
LOC105222998	147.7	152.27	151.44	145.07	144	226.18	235.93	262.96	216.18	198.43	158.1	170.54	164.69	163.85	155.16	191.81	189.13	172.05	173.76	164.71	148.34	159.22	193.98	165.14	161.26	13738	11969	14094	11795	11447	16589	23296	17299	16067	16840	11172	14546	10538	9171	9987	12864	16266	14245	11238	12019	10559	10458	17165	14451
LOC105222999	0	0	0	0	0	0	0	0	0	0	0.03	0	0	0	0	0.04	0	0	0	0	0	0	0	0	0	0	0	0	0	0	0	0	0	0	0	1	0	0	0	0	1	0	0	0	0	0	0	0	0
LOC105223000	0	0	0	0	0	0	0	0	0	0	0	0	0	0	0	0	0	0	0	0	0	0	0	0	0	0	0	0	0	0	0	0	0	0	0	0	0	0	0	0	0	0	0	0	0	0	0	0	0
LOC105223001	0	0	0	0.03	0	0	0	0	0.07	0	0	0.03	0.09	0.05	0.04	0	0.03	0	0	0	0	0.08	0.03	0	0.07	0	0	0	1	0	0	0	0	2	0	0	1	2	1	1	0	1	0	0	0	0	2	1	0
LOC105223003	0.33	0.63	0.13	0.91	0.46	0.17	0.12	0	0.41	0.15	0.09	0	0.19	0	0.1	0.46	0.79	0.15	0.86	1.01	0.86	0.84	0.56	0.98	1.93	5	8	2	12	6	2	2	0	5	2	1	0	2	0	1	5	11	2	9	12	10	9	8	14
LOC105223004	0.07	0	0	0	0	0	0	0	0.09	0.04	0	0	0	0	0	0	0	0	0.05	0	0.05	0	0	0	0.05	2	0	0	0	0	0	0	0	2	1	0	0	0	0	0	0	0	0	1	0	1	0	0	0
LOC105223005	7.57	6.24	6.26	6.29	7.12	5.2	7.64	4.02	5.81	5.48	7.3	7.52	5.57	6.22	6.45	12.63	9.31	11.49	11.67	10.86	11.72	8.81	8.96	10.45	8.9	168	117	139	122	135	91	180	63	103	111	123	153	85	83	99	202	191	227	180	189	199	138	189	218
LOC105223006	20.85	18.51	19.19	23.03	20.31	24.41	21.73	21.85	22.67	20.89	27.75	28.43	27.85	30.21	29	34.64	33.05	29.4	32.32	33.07	33.69	32	36.41	31.72	32.89	962	720	886	928	800	888	1064	713	836	879	972	1202	883	838	925	1153	1410	1207	1036	1197	1190	1043	1597	1376
LOC105223007	1.32	1.29	1.05	0.98	1.36	0.11	0.36	0.16	0.21	0.36	0.18	0.33	0.15	0.23	0.37	0.33	0.18	0.21	0.29	0.29	0.61	0.34	0.29	0.62	0.34	104	86	83	68	92	7	30	9	13	26	11	24	8	11	20	19	13	15	16	18	37	19	22	46
LOC105223008	6.92	5.89	6.78	6.31	6.93	8.23	8.23	7.72	9.37	8.98	10.25	9.79	11.64	10.96	10.24	9.08	9.68	10.54	9.64	9.03	9.93	10.07	11.71	11.21	11.46	256	184	251	204	219	240	323	202	277	303	288	332	296	244	262	242	331	347	248	262	281	263	412	390
LOC105223009	0	0.17	0.04	0.29	0.17	0.55	0.44	0.87	0.5	0.4	0.67	0.63	0.68	1.26	0.42	0.7	0.35	0.49	0.47	0.74	0.66	0.51	0.76	1.08	0.92	0	4	1	7	4	12	13	17	11	10	14	16	13	21	8	14	9	12	9	16	14	10	20	28
LOC105223010	13.97	12.09	13.04	11.94	13.25	42.88	47.26	44.29	40.37	46.01	72.66	71.22	74.5	71.9	68.49	87.65	84.28	86.16	90.74	95.4	62.97	77.9	72.91	69.6	68.55	1812	1310	1679	1353	1452	4384	6577	4103	4134	5446	7150	8488	6695	5653	6128	8277	10114	9998	8260	9836	6228	7258	8953	8426
LOC105223011	5.6	4.24	4.22	5.76	3.76	13.82	13.73	11.08	12.34	12.09	21.12	16.19	18.68	17.59	17.23	21.18	23.55	23.84	20.02	24.24	23.87	25.86	22.87	23.45	22.07	289	184.94	217.84	259.96	165.82	561.94	751.78	403.83	508.6	568.93	827.6	765.55	663	545.92	614.98	787.5	1122.88	1094.94	717.88	980.78	942.26	941.82	1121.67	1137.9
LOC105223012	0.05	0.11	0.05	0	0	0	0	0	0.06	0	0.13	0	0.07	0	0.07	0.2	0.05	0.05	0	0.06	0.19	0	0.2	0.2	0.12	1	2	1	0	0	0	0	0	1	0	2	0	1	0	1	3	1	1	0	1	3	0	4	4
LOC105223013	3.38	2.73	2.37	3.81	2.97	17.53	14.1	15.41	22.57	20.39	11.77	13.23	9.7	18.08	17.81	13.11	7.69	13.73	11.71	19.07	20.46	16.72	11.39	13.8	18.01	203	139	143	200	151	830	898	655	1086	1119	534	729	402	654	742	569	428	735	490	901	943	711	650	782
LOC105223014	0.02	0.02	0.08	0.07	0.07	0.25	0.34	0.17	0.16	0.18	0.33	0.36	0.29	0.1	0.32	0.37	0.74	0.14	0.29	0.31	0.33	0.32	0.47	0.36	0.41	1	1.06	4.16	3.04	3.18	10.06	18.22	6.17	6.4	8.07	12.4	16.45	10	3.08	11.02	13.5	34.12	6.06	10.12	12.22	12.74	11.18	22.33	17.1
LOC105223015	0.09	0.11	0.08	0.07	0.11	0.22	0.25	0.13	0.23	0.17	0.1	0.07	0.17	0.3	0.32	0.31	0.27	0.22	0.15	0.32	0.19	0.11	0.19	0.25	0.2	7	7	6	5	7	13	20	7	14	12	6	5	9	14	17	17	19	15	8	19	11	6	14	18
LOC105223016	2.17	2.66	1.78	2.68	1.59	1.22	0.74	0.84	1.11	1.14	0.81	0.94	0.97	1.15	0.68	0.86	1.2	0.78	0.96	0.69	0.52	1.05	0.86	0.84	0.84	88	91	72	95	55	39	32	24	36	42	25	35	27	28	19	25	45	28	27	22	16	30	33	32
LOC105223017	3.18	3.13	3.44	3.54	2.69	1.79	1.58	1.12	1.66	1.35	1.98	1.06	0.77	1.61	1.02	0.12	1.72	0.79	1.9	1.24	0.12	0.5	1.02	1.6	1.01	36	30	39	35	26	16	19	9	15	14	17	11	6	11	8	1	18	8	15	11	1	4	11	17
LOC105223018	5.23	5.06	5.05	5.25	4.61	7.23	7.7	6.57	8.54	8.59	6.77	6.35	5.96	7.16	5.71	6.65	5.48	7.2	7.08	7.64	6.86	8.01	6.4	6.72	7.23	356	291	344	312	268	388	556	316	464	533	350	396	279	293	269	326	345	436	335	408	357	385	414	430
LOC105223019	16.43	15.61	14.76	15.51	15.63	15.87	15.45	15.51	18.38	18.17	15.87	16.26	16.61	18.27	14.91	15.78	14.71	16.18	17.93	16.32	15.91	16.56	18.03	16.67	17.06	680	546	611	561	553	518	679	454	608	686	499	617	473	455	427	471	563	596	516	530	504	484	710	649
LOC105223020	30.73	33.59	34.65	30.76	32.75	34.19	33.01	35.15	32.07	31.18	37.06	38.43	39.17	38.24	33.72	41.66	43.71	42.71	44.57	44.48	37.04	38.14	40.78	41	39.7	3686	3405	4158	3225	3357	3234	4203	2982	3074	3412	3377	4227	3232	2760	2799	3603	4848	4560	3717	4186	3400	3230	4653	4626
LOC105223021	0.17	0.05	0.11	0.09	0.04	0.35	0.17	0.27	0.22	0.34	0.23	0.16	0.34	0.24	0.28	0.45	0.35	0.34	0.44	0.33	0.48	0.46	0.38	0.31	0.4	11	3	7	5	2	18	12	12	11	20	11	9	15	9	12	21	21	19	19	16	24	21	23	18
LOC105223022	9.29	9.72	8.82	10.65	9.58	11.33	8.79	10.76	11.49	10.63	7.65	7.84	8.3	8.44	6.8	5.87	7.59	6.87	6.72	5.95	7.58	6.85	7.58	7	8.27	415	367	394	416	366	399	417	340	410	433	260	321	255	227	210	189	314	273	209	209	259	216	322	294
LOC105223023	0	0	0	0	0	0	0	0	0	0	0	0	0	0	0.26	0	0	0	0	0	0.35	0	0.1	0.1	0.11	0	0	0	0	0	0	0	0	0	0	0	0	0	0	2	0	0	0	0	0	3	0	1	1
LOC105223024	11.52	11.39	11.44	10.87	10.2	25.53	23.91	26.33	23.61	23.2	25.78	25.24	27.91	25.59	24.54	29.89	27.21	27.16	28.86	25.97	32.33	30.37	31.75	32.67	34.01	807	674	802	666	611	1412	1778	1304	1322	1483	1373	1625	1345	1080	1192	1514	1763	1698	1406	1432	1735	1505	2122	2158
LOC105223025	2.18	1.58	1.48	1.65	1.43	1.74	1.5	2.98	2.92	1.7	3.55	2.62	2.69	2.21	3.79	4.1	3.12	2.66	2.77	2.36	2.08	2.98	2.8	3.34	2.29	59	36	40	39	33	37	43	57	63	42	73	65	50	36	71	80	78	64	52	50	43	57	72	85
LOC105223026	1.93	1.57	0.86	1.76	1.8	1.79	2.46	1.39	1.45	2.25	3.32	2.52	2.49	2.92	3.15	4.93	2.82	3.03	2.83	3.93	4.08	3.94	3.78	3.73	4.06	45	31	20	36	36	33	61	23	27	48	59	54	40	41	51	83	61	63	46	72	73	65	84	82
LOC105223027	2.67	2.16	2.25	5.14	2.49	7.47	11.5	7.9	12.39	8.52	8.79	6.16	5.56	9.69	6.85	8.51	6.44	6.35	4.45	5.42	7.14	6.36	7.66	10.07	6.53	44	30	37	74	35	97	201	92	163	128	110	93	63	96	78	101	98	93	51	70	90	74	120	156
LOC105223028	0	0	0	0	0	0	0	0	0	0	0	0	0	0	0	0	0	0	0	0	0	0	0	0	0	0	0	0	0	0	0	0	0	0	0	0	0	0	0	0	0	0	0	0	0	0	0	0	0
LOC105223029	0.06	0.05	0.06	0.02	0	0.1	0.09	0	0.08	0.04	0.11	0.04	0.03	0	0.09	0.03	0.02	0.11	0.14	0.05	0.03	0.06	0.08	0.15	0.05	3	2	3	1	0	4	5	0	3	2	4	2	1	0	3	1	1	5	5	2	1	2	4	7
LOC105223030	13.23	13.15	14.49	13.76	14.46	10.58	12.26	10.76	10.73	8.87	11.83	12.92	10.13	10.77	10.23	13.83	12.61	13.48	13.93	13.69	13.05	13.5	12.84	13.45	14.04	1133	916	1192	1035	995	667	1032	542	660	681	679	903	549	514	524	734	858	893	731	826	727	650	874	910
LOC105223031	26.62	26.38	28.74	24.23	28.63	36.67	30.9	41.45	32.96	31.36	41.4	47.59	41.05	42.58	45.18	40.32	47.64	43.94	49.36	50.6	41.62	45.66	56.5	52.85	53.25	1932	1607	2072	1540	1784	2111	2382	2148	1905	2067	2310	3174	2053	1866	2278	2128	3214	2847	2502	2906	2316	2337	3890	3589
LOC105223032	0.17	0	0	0	0	0	0.23	0.12	0.21	0	0.11	0	0	0	0	0	0	0.19	0.12	0.11	0.22	0	0	0	0	2	0	0	0	0	0	3	1	2	0	1	0	0	0	0	0	0	2	1	1	2	0	0	0
LOC105223033	11.77	13.67	11.68	12.08	12.41	27.01	22.22	25.21	26.1	24.82	17.74	18.5	17.15	19.82	18.36	16.88	14.84	15.93	16.81	16.78	14.14	16.61	16.35	15.68	17.69	533	523	529	478	480	964	1068	807	944	1025	610	768	534	540	575	551	621	642	529	596	490	531	704	668
LOC105223034	14.86	13.64	13.78	16.17	13.73	21.92	19.72	22.37	21.95	21.38	18.31	15.21	14.6	15.84	14.73	15.26	14.91	12.09	12.94	12.56	12.69	11.69	12.7	12.32	12.83	273	212	252	259	214	315	382	290	320	358	255	255	185	175	186	202	253	196	165	180	178	152	222	213
LOC105223035	51.98	50.35	48.55	45.3	39.97	20.3	28.77	21.19	25.53	22.07	36.45	39.29	27.28	31.81	41.8	51.28	50.1	51.59	46.54	66.47	58.33	71.26	54.31	57.39	65.77	1939	1587	1812	1477	1274	597	1139	559	761	751	1033	1344	700	714	1079	1379	1728	1713	1207	1945	1665	1877	1927	2014
LOC105223036	22.74	25.49	25.51	22.15	20.18	14.89	14.64	12.88	21.39	26.61	12.24	14.35	10.69	18.59	20.96	12.11	4.05	16.03	8.03	14.02	21.41	15.38	14.61	15.39	15.5	639	606	719	547	484	331	438	257	482	683	263	370	207	316	408	247	105	401	156	311	460	306	392	407
LOC105223037	0.75	0.33	0.33	0.32	0.44	0.12	0.09	0	0.12	0.26	0.06	0.05	0	0.08	0.14	0.52	0	0.05	0.14	0.12	0.43	0.13	0.15	0.15	0.42	16	6	7	6	8	2	2	0	2	5	1	1	0	1	2	8	0	1	2	2	7	2	3	3
LOC105223038	47.85	50.07	45.64	46.85	49.01	61.99	61.63	61.57	63.41	63.31	61.77	61.03	64.24	61.93	64.31	67.94	66.02	69.19	64.84	69.68	67.66	71.49	58.23	63.45	63.62	2092	1850	1996	1790	1831	2137	2860	1903	2215	2525	2051	2447	1931	1628	1945	2142	2667	2692	1971	2389	2263	2206	2421	2609
LOC105223039	0.1	0.08	0.13	0.11	0.11	0.33	0.18	0.18	0.2	0.49	0.04	0.14	0.19	0.16	0.19	0.22	0.42	0.4	0.05	0.16	0.17	0.18	0.37	0.1	0.41	3	2	4	3	3	8	6	4	5	14	1	4	4	3	4	5	12	11	1	4	4	4	11	3
LOC105223040	0	0	0	0	0	0	0	0	0	0	0	0	0	0	0	0	0	0	0	0	0.09	0	0	0	0	0	0	0	0	0	0	0	0	0	0	0	0	0	0	0	0	0	0	0	0	1	0	0	0
LOC105223041	0.01	0.04	0.01	0.01	0.03	0.02	0.03	0.03	0.09	0.04	0.02	0.04	0.07	0.04	0.04	0.02	0.08	0.07	0.05	0.11	0.14	0.1	0.06	0.12	0.14	1	3	1	1	2	1	3	2	6	3	1	3	4	2	2	1	6	5	3	7	9	6	5	9
LOC105223043	0.62	0.73	0.49	0.71	0.14	0.47	1.16	0	0.77	0.54	0.81	1.08	1.08	0.41	0.54	2.57	1.33	1.11	1.78	0.94	1.29	0.7	1.82	1.44	2.5	5	5	4	5	1	3	10	0	5	4	5	8	6	2	3	15	10	8	10	6	8	4	14	11
LOC105223045	0	0.03	0	0	0	0.03	0.04	0	0	0.02	0	0	0	0	0	0.03	0	0.02	0.09	0.05	0.03	0.03	0.02	0.05	0.03	0	1	0	0	0	1	2	0	0	1	0	0	0	0	0	1	0	1	3	2	1	1	1	2
LOC105223046	17.51	16.4	16.49	18.3	17.93	10.52	11.37	9.68	11.58	10.22	11.45	13.09	11.11	13.45	13.17	14.53	13.12	13	14.69	14.97	15.08	14.59	13.87	15.91	13.65	1218	963	1146	1111	1064	575	837	476	642	648	603	833	531	562	632	727	842	803	708	815	801	716	917	1039
LOC105223047	0.34	0.33	0.28	0.47	0.38	0.75	0.74	0.88	0.86	0.69	1.58	1.24	1.32	1.35	0.81	2.25	2.18	1.81	1.8	1.75	2.96	1.93	1.94	2.79	2.37	22	18	18	26	21	38	50	40	44	40	77	73	58	52	36	104	129	103	80	88	145	87	118	168
LOC105223048	951.61	1023.45	973.5	1006.46	943.97	1133.09	976.19	1128.17	1117.74	1072.5	970.36	923.58	910.71	980.33	934.02	819.72	785.3	727.36	734.57	704.77	627.46	643.64	718.04	698.99	627.83	11082	10072	11343	10245	9395	10405	12068	9292	10401	11396	8585	9863	7296	6870	7527	6883	8456	7540	5948	6439	5592	5293	7955	7658
LOC105223049	2.29	2.6	2.85	3	2.73	1.81	1.64	2.27	1.84	2.31	1.61	2.25	1.64	1.65	1.41	2.1	1.88	2.11	2.05	1.82	2.25	1.57	1.4	1.76	1.4	101	97	126	116	103	63	77	71	65	93	54	91	50	44	43	67	77	83	63	63	76	49	59	73
LOC105223050	0.01	0.04	0	0.04	0	0.01	0.06	0.03	0.06	0.01	0.03	0.1	0	0	0.01	0.03	0.06	0.09	0.1	0.03	0.05	0.07	0.02	0.13	0.05	1	3	0	3	0	1	6	2	5	1	2	9	0	0	1	2	5	8	7	2	4	5	2	12
LOC105223051	25.87	26.48	26.91	22.74	24.02	20.81	21.39	18.9	16.87	19.86	14.33	17.36	16.81	13.23	15.26	12.08	14.58	15.17	17.24	16.95	10.64	13.72	17.3	16.12	15.34	1105	956	1150	849	877	701	970	571	576	774	465	680	494	340	451	372	576	577	512	568	348	414	703	648
LOC105223052	77.98	92.13	82.81	73.61	76.05	148.7	115.67	143.32	113.43	142.61	71.59	74.36	92.58	90.38	73.98	52.71	69.06	69.57	71.63	66.35	42.87	56.72	64.58	58.99	56.74	1904	1901	2023	1571	1587	2863	2998	2475	2213	3177	1328	1665	1555	1328	1250	928	1559	1512	1216	1271	801	978	1500	1355
LOC105223053	9.23	9.25	9.26	9.75	8.88	10.19	11.2	10.63	10.46	10.15	11.67	12.06	10.96	11.36	11.4	18.15	16.19	15.69	17.18	17.3	17.5	16.25	16.2	18.77	18.82	1055	888	1056	985	863	925	1376	874	958	1062	1023	1274	865	785	909	1515	1737	1611	1379	1575	1531	1323	1770	2015
LOC105223054	0	0	0	0.35	0.06	0.06	0.19	0	0.06	0.06	0.27	0.11	0	0.08	0.15	0.28	0.05	0.29	0	0.19	0.2	0.29	0.05	0	0.06	0	0	0	6	1	1	4	0	1	1	4	2	0	1	2	4	1	5	0	3	3	4	1	0
LOC105223055	12.13	11.43	12.07	13.08	11.53	7.03	8.72	8.05	8.3	7.11	6.58	8.69	7.85	7.57	7.73	8.03	7.76	9.51	9.04	6.82	8.22	9.68	9.63	9.37	8.21	245	195	244	231	199	112	187	115	134	131	101	161	109	92	108	117	145	171	127	108	127	138	185	178
LOC105223056	71.17	68.13	72.76	69.55	68.61	25.48	35.81	27.83	30.25	33.74	41.33	39.45	32.59	33.65	40.54	42.7	39.65	46.92	38.93	42.83	48.98	52.96	47.17	49.17	50.99	1743	1410	1783	1489	1436	492	931	482	592	754	769	886	549	496	687	754	898	1023	663	823	918	916	1099	1133
LOC105223057	49.06	55.4	49.25	50.99	49.34	42.38	43.07	41.76	48.32	45.44	38.37	39.18	40.79	39.72	42.44	32.16	28.98	37.66	34.37	33.53	35.81	35.16	32.6	34.76	32.73	897	856	901	815	771	611	836	540	706	758	533	657	513	437	537	424	490	613	437	481	501	454	567	598
LOC105223058	0.62	0.69	1.17	0.88	0.94	1.43	1.31	1.86	1.1	1.4	1.73	1.55	1.96	1.39	1.53	2.38	2.13	1.56	1	1.49	0.95	1.45	1.69	1.05	1.57	17	16	32	21	22	31	38	36	24	35	36	39	37	23	29	47	54	38	19	32	20	28	44	27
LOC105223059	60.09	51.35	46.97	57.89	50.68	75.31	61.41	57.64	74.76	62.01	64.76	58.06	56.44	59.13	59.54	47.88	49.12	46.58	44.35	38.86	42.59	40.18	44.6	40.62	38.23	684	494	535	576	493	676	742	464	680	644	560	606	442	405	469	393	517	472	351	347	371	323	483	435
LOC105223060	4.67	3.85	4.03	5.83	3.72	5.38	1.33	2.5	0.71	1.78	6.14	4.86	5.55	4.47	3.88	10.89	9.26	6.36	7.53	7.12	8.41	4.61	8.55	9.32	5.28	66	46	57	72	45	60	20	25	8	23	66	63	54	38	38	111	121	80	74	79	91	46	115	124
LOC105223061	103.37	106.56	104.69	112.65	120.84	47.24	54.53	48.96	33.46	41.71	53.54	56.28	65.21	62.84	46.61	41.43	52.17	43.34	48.1	29.04	38.97	29.98	47.2	47.63	34.55	2173	1893	2202	2070	2171	783	1217	728	562	800	855	1085	943	795	678	628	1014	811	703	479	627	445	944	942
LOC105223062	0.04	0	0	0	0	0	0.04	0	0	0	0.05	0.04	0.16	0	0.11	0.21	0	0.08	0.05	0.05	0	0.16	0.08	0.24	0.19	1	0	0	0	0	0	1	0	0	0	1	1	3	0	2	4	0	2	1	1	0	3	2	6
LOC105223063	76.38	80.94	100.35	77.84	89.76	57.93	33.71	35.1	31.94	38.85	34.27	26.55	29.24	33.55	34.38	45.75	35.4	36.36	41.26	46.97	42.24	38.33	40.9	37.41	45.13	2077	1860	2730	1850	2086	1242	973	675	694	964	708	662	547	549	647	897	890	880	780	1002	879	736	1058	957
LOC105223064	0	0	0	0	0	0	0	0	0	0	0	0	0.36	0	0	0	0	0	0.18	0.08	0	0	0	0	0	0	0	0	0	0	0	0	0	0	0	0	0	4	0	0	0	0	0	2	1	0	0	0	0
LOC105223065	0.07	0	0	0	0	0.13	0	0.1	0.04	0.08	0.14	0.15	0.05	0.06	0.05	0.24	0.08	0.04	0.25	0.31	0.14	0	0.11	0.19	0.27	2	0	0	0	0	3	0	2	1	2	3	4	1	1	1	5	2	1	5	7	3	0	3	5
LOC105223066	291.48	296.81	309.25	261.66	353.59	117.45	170.78	120.6	127.97	139.09	195.53	205.26	149.67	167.6	188.8	209.21	214.33	201.56	232.89	231.25	217.09	219.97	212.78	197.54	239.87	19006	16354	20174	14907	19694	6040	11813	5560	6666	8276	9685	12275	6709	6574	8518	9835	12920	11691	10555	11829	10832	10121	13191	12106
LOC105223067	0.31	3	0.31	0.2	1.75	0.47	1.19	0.28	0.8	3.83	0	0	0.06	0.04	0	0	0	0	0.11	0.08	1.15	0.06	0.59	0.02	0.06	14	115.34	14	8	68	17	57.4	9	29	159.05	0	0	2	1	0	0	0	0	3.33	3	40.01	2	25.6	1
LOC105223068	0.1	0.09	0.05	0.11	0.1	0.15	0.11	0.02	0.23	0.11	0.21	0.2	0.09	0.25	0.29	0.14	0.11	0.22	0.14	0.38	0.48	0.54	0.35	0.24	0.39	8	6	4	9	7	10	10	1	15	10	13	15	5	12	16	8	10	17	8	25	31	31	27	18
LOC105223069	0	0	0	0	0	0	0	0	0	0	0	0	0	0	0.21	0	0	0	0	0	0	0	0	0	0	0	0	0	0	0	0	0	0	0	0	0	0	0	0	2	0	0	0	0	0	0	0	0	0
LOC105223070	0.03	0.03	0	0	0	0	0	0	0	0.03	0.07	0.06	0	0.05	0.28	0	0.03	0.15	0.16	0.59	0.32	0.16	0.14	0.03	0	1	1	0	0	0	0	0	0	0	1	2	2	0	1	7	0	1	5	4	17	9	4	5	1
LOC105223071	21.42	22.08	19.58	20.47	19.21	105.62	80.28	62.94	76.64	74.68	66.77	72.84	67.53	69.33	64.55	46.71	53.76	47.56	56.86	37.69	47.35	35.94	45.6	41.7	39.76	551.95	480.87	504.88	460.92	422.97	2145.86	2195.93	1146.9	1577.83	1755.8	1306.94	1720.97	1196.92	1074.91	1150.91	867.85	1280.9	1090.91	1018.61	761.89	933.59	654	1117.83	1010.87
LOC105223072	3.75	3.31	3.63	3.37	3.8	3.15	3.17	2.97	2.96	3.27	2.9	2.94	3.25	3.11	2.93	2.7	3.13	3.13	3.03	3.5	3.02	3.21	3.83	2.94	3.31	491	360	473	385	417	325	437	274	306	380	286	353	290	243	264	254	378	359	275	359	298	297	472	360
LOC105223073	3.12	2.95	3.05	2.89	3.27	1.97	2.83	2.33	2.38	2.55	2.13	1.69	2.2	2.04	2.22	2.55	2.15	2.29	2.25	2.34	2.73	2.77	3.29	2.97	2.96	185	148	181	150	166	92	178	98	113	138	96	92	90	73	91	109	118	121	93	109	124	116	186	166
LOC105223074	26.95	25.23	27.5	26.86	25.91	12.32	15.21	11.28	13.27	13.16	19.26	17.65	16.69	16.95	17.66	24.1	22.28	22.54	22.27	25.05	24.77	26.4	22.75	26.58	27.05	2148	1699	2193	1871	1765	774	1287	636	845	957	1166	1290	915	813	974	1385	1642	1599	1234	1566	1511	1486	1725	1993
LOC105223075	32.48	32.92	26.32	33.71	29.89	9.32	12.95	7.82	9.09	9.77	8.96	11.88	9.54	9.47	9.84	10.42	8.17	11.45	10.39	10.94	10.73	9.82	12.71	10.79	11.17	787	674	638	714	619	178	333	134	176	216	165	264	159	138	165	182	183	247	175	208	199	168	293	246
LOC105223076	29.73	29.62	28.73	29.68	25.78	52.58	55.45	55.95	54.25	51.8	44.62	43.86	46.24	44.31	46.44	40.69	43.22	36.62	43.22	42.96	37.48	39.14	38.65	41.58	39.09	456	384	441	398	338	636	903	607	665	725	520	617	488	409	493	450	613	500	461	517	440	424	564	600
LOC105223077	187.38	186.29	178.16	197.72	183.14	186.1	182.64	168.53	193.74	198.45	184.51	178.23	170.83	176.16	167.58	162.25	166.27	167.76	149.72	151.15	160.17	154.04	171.28	162.21	147.34	4930	4142	4690	4547	4118	3861	5101	3136	4073	4764	3688	4300	3092	2789	3051	3078	4045	3929	2739	3120	3225	2862	4287	4015
LOC105223078	24.19	26.23	24.13	21.81	21.69	34.37	32.59	33.11	32.7	34.63	35.35	34.3	32.64	33.21	30	33.22	30.72	30.88	32.43	32.13	27.88	30.97	34.44	30.14	33.12	500	458	499	394	383	560	715	484	540	653	555	650	464	413	429	495	587	568	466	521	441	452	677	586
LOC105223079	18.03	17.52	17.07	17.51	18.62	12.09	14.77	10.51	12.18	11.19	12.98	13.67	10.68	11.22	12.09	16.74	18.2	17.01	16.3	19.11	18.66	18.96	18.9	18.05	19.91	1234	1014	1171	1050	1090	654	1076	510	668	702	678	860	502	463	575	833	1155	1040	777	1033	983	917	1233	1169
LOC105223080	53.01	38.39	39.3	43.39	41.23	8.24	14.42	8.65	10.47	12.92	15.47	15.06	9.12	8.9	14.33	25.27	21.14	25.81	22.06	29.85	36.23	36.43	33.21	33.88	39.81	1673	1024	1241	1197	1112	205	483	193	264	372	371	436	198	169	313	575	617	725	484	739	875	812	997	1006
LOC105223081	16.53	13.21	13.74	14.9	15.41	31.41	24.34	27.63	27.95	27.85	27.61	23.57	26.22	31.64	30.31	26.21	22.84	22.03	23.78	24.36	23.1	27.87	12.87	15.14	17.48	231	156	192	182	184	346	361	273	312	355	293	302	252	266	293	264	295	274	231	267	247	275	171	199
LOC105223082	0.48	0.23	0.82	0.26	0.36	0.11	0.03	0.12	0.18	0.12	0.15	0.06	0.16	0.09	0.08	0.2	0.12	0.06	0.24	0.14	0.07	0.32	0.12	0.09	0.11	17	7	29	8	11	3	1	3	5	4	4	2	4	2	2	5	4	2	6	4	2	8	4	3
LOC105223083	21.13	20.47	21.58	20.33	19.26	31.44	32.42	30.14	25.97	28.59	18.67	19.86	21.34	20.28	16.31	16.59	16.26	16.77	15.82	15.79	15.34	13.56	17.29	16.31	15.6	1092	894	1115	919	851	1281	1778	1101	1072	1348	732	941	758	630	582	617	776	770	568	639	606	494	848	792
LOC105223084	8.71	6.65	8.36	8.52	8.05	14.1	14	15.64	15.45	13.93	12.03	13.21	16.98	14.08	14.26	12.86	12.99	12.31	11.48	12.37	12.33	10.46	11.95	9.71	11.01	300	194	289	257	238	384	514	382	427	439	316	419	404	293	341	320	415	379	276	335	326	255	393	316
LOC105223085	0.06	0.18	0.12	0.12	0.21	0.08	0.11	0.18	0.19	0.06	0.19	0.17	0.21	0.29	0.11	0.12	0.24	0.21	0.19	0.31	0.16	0.08	0.27	0.29	0.16	4.23	10.5	8.46	7.08	12.27	4.55	8.14	9	10.35	3.87	10	10.64	10	12.18	5.29	6	15.76	13.12	9.03	17.22	8.35	4.18	18	18.99
LOC105223086	5.64	5.78	6.92	5.62	5.81	11.64	10.94	11.23	10.95	10.95	9.59	10.93	10.78	11.57	9.88	11.12	10.74	11.74	11.51	13.11	12.08	11.16	10.1	10.32	10.24	529.77	456.5	646.54	460.92	464.73	854.45	1084.86	738	817.65	937.13	679	933.36	690	648.82	642.71	745	931.24	980.88	749.97	959.78	860.65	738.82	897	910.01
LOC105223087	0.35	0.08	0.77	0.32	0.49	0.09	0.46	0.2	0.18	0.15	0	0.08	0.1	0.23	0	0.1	0	0.08	0	0.27	0.18	0.3	0	0.37	0.36	5	1	11	4	6	1	7	2	2	2	0	1	1	2	0	1	0	1	0	3	2	3	0	5
LOC105223088	44.09	46.48	42.54	45.42	42.8	78.27	87.55	74.92	106.97	113.23	76.24	75.54	69.18	84.34	89.44	84.08	59.82	85.78	72.63	81.41	93	96.9	80.4	83.14	82.41	1045	931	1009	941	867	1463	2203	1256	2026	2449	1373	1642	1128	1203	1467	1437	1311	1810	1197	1514	1687	1622	1813	1854
LOC105223089	3.39	3.38	3.34	4.19	2.87	4.58	3.32	3.34	4.24	4.11	2.88	4.18	3.05	3.93	2.19	1.55	2.51	3.61	3.4	4.04	3.27	3.67	2.86	2.7	2.54	76	64	75	82	55	81	79	53	76	84	49	86	47	53	34	25	52	72	53	71	56	58	61	57
LOC105223090	10.22	12.63	11.5	10.78	11.27	11.03	10.8	11.66	12.66	12.23	12.95	10.43	12.74	11.46	11.87	12.59	11.35	10.63	10.51	13.25	12.22	12.95	13.18	12.26	13.59	295	308	332	272	278	251	331	238	292	322	284	276	253	199	237	262	303	273	211	300	270	264	362	333
LOC105223091	10.78	10.23	12.6	9.55	12.09	5.49	7.41	5.34	5.75	5.36	6.68	8.64	5.06	6.77	6.8	7.11	9.63	8.75	8.8	9.66	8.87	11.45	9.79	9.63	11.51	290	233	340	225	279	116	211	102	123	132	137	214	94	110	127	138	240	210	165	204	183	217	251	243
LOC105223092	17.33	17.39	18.45	21.28	18.2	15.76	15.92	18.47	16.08	18.05	14.58	19.28	16.51	15.22	15.8	16.15	17.2	18.83	16.24	16.83	18.09	14.08	15	16.45	18.33	244	207	260	262	219	175	238	184	181	232	156	249	160	129	154	164	224	236	159	186	195	140	201	218
LOC105223093	746.86	781.14	830.67	686.63	730.6	359.38	322.29	418.33	333.82	305.28	255.37	286.14	293.39	278.21	296.91	261.68	298.51	296.21	278.7	287.1	232.08	254.56	270.47	250.62	254.64	33334	29462	37094	26787	27868	12648	15270	13205	11905	12432	8659	11711	9008	7472	9170	8421	12319	11768	8649	10053	7927	8023	11484	10523
LOC105223094	88.82	88.37	88.37	116.34	87.08	206.83	210.55	209.44	202.13	159.82	108.25	106.33	112.04	131.82	118.91	128.72	110.92	129.28	115.99	129.5	126.88	134.61	116.67	115.26	116.84	1739	1462	1731	1991	1457	3193	4376	2900	3162	2855	1610	1909	1509	1553	1611	1817	2008	2253	1579	1989	1901	1861	2173	2123
LOC105223095	0	0.09	0.08	0	0	0	0.18	0.22	0.24	0	0	0.08	0	0	0	0.05	0	0.04	0.11	0.1	0.15	0	0.16	0.08	0.1	0	2	2	0	0	0	5	4	5	0	0	2	0	0	0	1	0	1	2	2	3	0	4	2
LOC105223096	352.27	378.95	395.48	336.67	385.03	402.04	371.72	462.86	383.63	283.1	425.81	412.06	489.43	395.79	419.73	428.05	494.69	473.44	431.87	404.51	425.36	418.43	435.5	442.93	435.89	9744	8858	10945	8140	9102	8769	10915	9055	8479	7145	8948	10452	9313	6588	8034	8537	12652	11657	8306	8778	9004	8173	11460	11526
LOC105223097	0.21	0.31	0.42	0	0	0.74	1.24	1.05	1.46	0.64	2.02	2.25	2	2.37	1.83	1.91	1.89	1.96	2.51	4.18	4.21	3.82	3.28	4.27	5.35	4	5	8	0	0	11	25	14	22	11	29	39	26	27	24	26	33	33	33	62	61	51	59	76
LOC105223098	2.12	3.47	0.63	6.65	1.77	22.82	0.03	0.36	0.24	0	9.89	0.24	0.69	0.26	0.56	0.61	0.34	0.43	0.23	0.6	0.91	0.76	0.96	0.77	0.52	67	93	20	184	48	570	1	8	6	0	238	7	15	5	12	14	10	12	5	15	22	17	29	23
LOC105223099	0.18	0.62	0.21	1.09	0.36	7.54	1.21	1.08	0.53	0.47	2.3	1.9	1.38	1.58	1.06	1.44	1.06	1.24	0.53	1.4	1.36	0.56	0.74	0.81	1.43	6	17	7	31	10	194	42	25	14	14	57	57	31	31	24	34	32	36	12	36	34	13	23	25
LOC105223100	0	0	0	0	0	0	0	0.09	0	0.04	0	0.04	0	0.05	0.05	0.05	0.07	0.04	0.05	0.12	0	0.09	0.03	0.09	0.07	0	0	0	0	0	0	0	2	0	1	0	1	0	1	1	1	2	1	1	3	0	2	1	3
LOC105223101	33.45	31.81	33.86	37.57	34.08	46.47	44.13	47.05	56.78	49.26	42.43	42.6	34.93	44.24	46.96	32.24	32.43	36.99	28.84	31.84	32.75	29.13	25.62	28.48	28.43	387	311	392	380	337	424	542	385	525	520	373	452	278	308	376	269	347	381	232	289	290	238	282	310
LOC105223102	6.23	5.92	5.6	8.18	6.45	8.73	10.69	8	8.05	5.55	8.51	6.53	4.76	5.25	7.06	12.56	12.18	10.94	11.91	10.9	13.7	11.01	12.59	11.18	12.81	209	168	188	240	185	231	381	190	216	170	217	201	110	106	164	304	378	327	278	287	352	261	402	353
LOC105223103	1.82	1.72	1.66	2.07	1.41	1.55	1.38	1.65	1.53	1.89	1.69	1.87	1.75	1.91	1.6	1.48	1.67	1.8	2.11	1.71	1.67	1.9	2.17	1.82	1.82	133	106	121	132	88	89	107	85	89	126	94	125	88	84	81	78	113	117	107	98	93	98	151	125
LOC105223104	7.6	6.65	6.51	6.41	7.27	4.86	5.75	5.35	4.11	5.47	5.42	6.39	5.62	5.62	5.54	6.71	6.19	6.34	5.8	5.95	6.36	6.19	6.33	6.16	5.4	454	336	389	335	371	229	365	226	196	298	246	350	231	202	229	289	342	337	241	279	291	261	360	346
LOC105223105	60.3	58.71	57.66	56.03	58.4	67	67.02	63.38	72.17	65.13	63.46	65.89	67.7	74.2	61.32	68.9	64.68	68.12	54.75	60.94	48.46	54.63	60.35	57.54	49.02	2224	1828	2125	1802	1840	1942	2619	1650	2121	2185	1774	2226	1714	1642	1558	1828	2199	2233	1400	1760	1365	1420	2108	1992
LOC105223106	20.55	20.48	21.12	20.97	20.25	18.68	20.99	15.8	20.3	20.9	20.41	20.45	19.33	22.67	18.65	25.42	22.17	24.18	25.22	25.01	23.78	25.6	24.86	24.44	24.5	1750	1504	1916	1546	1629	1049	1536	820	1095	1303	1089	1350	983	912	860	1315	1523	1542	1237	1391	1222	1233	1599	1558
LOC105223108	3.62	4.67	2.48	4.45	2.9	1.06	0.87	1.39	1.35	1.05	2.05	1.14	0.83	1.49	1.04	0.5	0.68	1.11	1.33	0.8	1.37	0.63	0.47	0.6	0.72	121	132	83	130	83	28	31	33	36	32	52	35	19	30	24	12	21	33	31	21	35	15	15	19
LOC105223109	68.24	61.77	67.25	62.2	53.37	82.47	72.12	81.16	84.64	71.56	83.89	91.72	89.74	80.83	89.34	70.59	79.24	78.9	84.05	75.27	74.78	75.88	75.65	68.39	75.03	787	602	776	627	526	750	883	662	780	753	735	970	712	561	713	587	845	810	674	681	660	618	830	742
LOC105223110	5.84	4.55	6.14	7.22	5.64	3.73	4.09	4.62	4.56	3.75	4.47	4.35	5.95	4.69	5.08	4.81	4.24	5.19	4.2	4.9	4.99	5.69	4.88	5.04	4.26	234	154	246	253	193	118	174	131	146	137	136	160	164	113	141	139	157	185	117	154	153	161	186	190
LOC105223111	0.51	0.32	0.24	0.18	0.34	0.26	0.42	0.17	0.21	0.22	0.45	0.22	0.21	0.2	0.12	0.26	0.22	0.44	0.37	0.47	0.4	0.24	0.39	0.45	0.37	30	16	14	9	16	12	26	7	10	12	20	12	8	7	5	11	12	23	14	20	18	10	22	25
LOC105223112	142.73	145.11	146.31	168.76	150.79	290.36	341.83	298.29	293.05	265.77	290.14	265.79	276.37	270.03	253.13	260.02	283.75	284.91	261.22	251.94	278.58	281.21	308.42	324.22	288.03	4588	3938	4674	4723	4101	7215	11454	6650	7385	7677	6939	7689	5993	5119	5541	5922	8264	8008	5732	6261	6731	6284	9250	9637
LOC105223113	23.95	20.19	23.06	22.07	19.4	13.28	12.97	13.3	14.68	14.77	12.51	13.96	13.25	13.37	15.27	13.45	11.11	13.61	13.67	14.58	13.3	14.14	11.52	12.06	11.65	247	176	238	199	171	108	142	97	121	139	98	132	94	83	109	100	106	125	98	118	105	103	113	117
LOC105223114	0	0	0	0	0	0	0	0	0	0	0	0	0	0	0	0	0	0	0	0	0	0	0	0	0	0	0	0	0	0	0	0	0	0	0	0	0	0	0	0	0	0	0	0	0	0	0	0	0
LOC105223115	3.21	2.91	3.46	4.02	3.7	2.6	3.22	2.16	3.03	3.73	3.61	3.38	3.02	4	3.74	4.79	4.37	4.71	5.35	5.13	6.18	6.33	4.82	5.65	5.55	252	193	272	276	248	161	268	120	190	267	215	243	163	189	203	271	317	329	292	316	371	351	360	417
LOC105223116	3.76	3.04	3.05	3.47	3.66	6.38	5.86	6.5	5.54	5.28	6.36	6.18	6.88	6.53	5.36	6.56	6.06	6.12	6.61	5.17	7.03	5.99	6.34	6.1	5.6	224.9	153.31	182.47	181.03	186.88	300.8	371.68	274.76	264.61	288.16	288.92	338.81	282.75	234.72	221.56	282.51	334.9	325.72	274.65	242.6	321.46	252.85	360.59	343.08
LOC105223117	10.04	9.72	10.45	12.02	11.97	4.43	3.65	3.84	2.92	4.4	4.85	5.35	4.68	5.28	6.35	6.25	8.05	6.79	7.85	8.5	8.51	8.49	9.68	9.24	7.92	663	571	688	688	690	243	267	171	159	254	246	329	219	226	296	306	480	408	370	429	422	381	577	545
LOC105223118	0.56	0.31	0.6	0.64	0.22	0.31	0.31	0.53	0.68	0.34	0.49	0.3	0.28	0.46	0.63	0.46	0.29	0.58	0.59	0.42	0.64	0.46	0.32	0.43	0.58	21.1	9.69	22.53	20.97	7.12	9.2	12.32	13.24	18.39	8.84	14.08	10.19	7.25	10.28	16.44	12.49	10.1	19.28	15.35	12.4	15.54	12.15	11.41	13.92
LOC105223119	4.94	4.04	4.67	4.58	4.2	3.19	3.21	2.97	3.28	3.36	3.49	3.17	2.88	3.75	3.16	4.27	4.51	5	5.46	4.21	4.5	4.63	4.47	5.85	4.9	379	262	358	307	275	193	261	161	200	235	202	223	152	173	167	236	320	341	291	252	264	250	326	422
LOC105223120	26.61	28.41	26.46	26.26	25.33	42.99	43.39	44.56	43.2	46.06	54.28	53.81	54.47	54.8	53.68	56.18	58.9	53.06	54.87	56.78	56.44	59.63	66.9	67.25	61.47	982	886	977	847	799	1251	1700	1163	1274	1551	1522	1821	1383	1217	1371	1495	2010	1743	1408	1644	1594	1554	2349	2335
LOC105223121	0.25	0.23	0.42	0.26	0.07	11.93	13.01	14.53	12.72	10.89	9.24	9.89	13.71	10.83	12.42	9.66	8.62	9.27	9.61	7.12	6.05	6.04	7.79	7.22	6.89	9	7	15	8	2	335	492	366	362	354	250	323	336	232	306	248	284	294	238	199	165	152	264	242
LOC105223122	0.54	0.63	0.88	0.51	0.8	0.28	0.35	0.72	0.31	0.35	0.48	0.38	0.32	0.71	0.18	0.68	0.36	0.48	0.5	0.71	0.8	0.42	0.89	1.27	0.45	17.05	17.13	24.12	12.08	21.03	6.14	9.07	16.1	7.17	12.2	12.06	11.03	8.08	11.09	4.09	14.15	11.1	14.09	15.39	19.11	22.41	9	26.17	32.13
LOC105223124	1.5	1.68	0.67	2.58	0.59	0.32	0.47	0.47	0.1	0.27	0.33	0	0	0	0.24	0.12	0.18	0	0	0	0.11	0	0.09	0	0.11	18	17	8	27	6	3	6	4	1	3	3	0	0	0	2	1	2	0	0	0	1	0	1	0
LOC105223125	74.87	77.6	73.43	75.29	81.84	35.92	38.2	32.94	33.8	34.1	35.32	39.75	31.54	34.25	38.59	42.33	44.5	41.53	43.08	46.14	47.33	45.96	47.59	46.81	53.43	2902	2542	2848	2551	2711	1098	1572	903	1047	1206	1040	1413	841	799	1035	1183	1595	1433	1161	1403	1404	1258	1755	1707
LOC105223126	21.97	23.04	22.48	19.4	22.11	26.53	24.66	26.19	26.8	22.44	29.18	28.58	28.03	29.89	28.78	31.33	27.61	30.1	32.21	33.51	27.75	30.29	25.86	31.58	29.52	616	546	631	476	531	587	735	520	601	574	622	736	541	505	559	635	716	752	629	738	596	601	690	834
LOC105223127	38.6	44.13	41.76	42.93	41.18	41.53	44.23	43.57	48.45	45.11	47.52	45.94	50.66	53.57	50.28	43.92	45.87	41.13	46.11	49.64	51.85	42.02	47.15	45.99	49.34	679	656	735	660	619	576	826	542	681	724	635	741	613	567	612	557	746	644	564	685	698	522	789	761
LOC105223129	3.02	1.66	1.17	2.06	2.13	16.92	5.83	11.44	25.09	15.27	27.24	20.26	25.44	30.96	30.12	46.54	1.32	28.01	36.14	66.71	84.06	98.27	29.4	42.37	76.57	196	91	76	117	118	866	402	525	1301	904	1343	1206	1136	1209	1353	2178	79	1618	1631	3397	4175	4504	1815	2587
LOC105223130	3.89	2.83	3.17	3.2	3.1	2.07	2.57	1.92	2.06	2.1	1.85	2.3	1.6	1.81	2.07	2.59	2.95	2.8	3.3	3.52	3.55	3.82	3.39	3.6	3.83	410	252	334	295	279	172	287	143	173	202	148	222	116	115	151	197	287	263	242	291	286	284	340	357
LOC105223131	4.22	5.71	3.74	4.21	3.11	0.92	2.78	1.96	2.11	2.98	1.99	2.43	2.72	1.9	1.74	3.26	1.7	1.97	3.3	2.92	2.6	4.19	2.73	3.27	2.82	70	80	62	61	44	12	49	23	28	45	25	37	31	19	20	39	26	29	38	38	33	49	43	51
LOC105223132	21.14	20.24	16.5	20.42	15.73	26.61	21.04	28.93	28.04	21.12	22.71	23.37	24.21	18.49	24.93	26.83	23.34	22.23	18.8	17.33	19.62	22.63	23.63	21.04	21.92	283	229	221	239	180	281	299	274	300	258	231	287	223	149	231	259	289	265	175	182	201	214	301	265
LOC105223133	7.08	5.62	5.31	4.65	6.21	1.97	2.73	1.35	2.05	2.39	3.11	3.13	2.57	2.85	3.18	4.36	4.1	4.78	4.1	5.85	6.19	7.06	6.38	6.49	6.83	569	382	427	327	427	125	233	77	132	175	190	231	142	138	177	253	305	342	229	369	381	401	488	491
LOC105223134	11.69	9.78	10.74	10.49	10.99	8.82	8.8	8.3	9.32	9.25	10.1	7.98	10.44	7.73	7.57	7.58	8.06	10.25	10.71	8.17	9.44	9.14	9.21	7.73	7.77	259	183	238	203	208	154	207	130	165	187	170	162	159	103	116	121	165	202	165	142	160	143	194	161
LOC105223135	113.92	114.84	116.63	112.99	115.74	50.62	54.3	51.82	50.31	54.63	50.15	50.69	47.63	54.04	52.5	50.75	53.41	54.11	52.9	56.45	55.34	56.29	54.96	55.52	58.84	8306	7076	8508	7201	7212	2910	4203	2672	2931	3634	2778	3389	2389	2371	2649	2668	3601	3512	2682	3229	3088	2898	3812	3808
LOC105223136	19.62	19.81	20.27	17.71	21.41	10.72	14.4	10.69	10.48	12.7	15.02	16.64	11.39	10.73	14.29	20.79	21.68	19.24	20.44	23.27	23.97	24.93	25	26.42	27.28	1359	1157	1403	1077	1266	582	1068	523	580	806	792	1056	544	447	685	1031	1388	1192	983	1266	1268	1216	1639	1721
LOC105223137	21	21.56	20.97	20.86	21.84	38.7	33.78	37.97	37.4	30.89	26	27.58	29.16	25.9	24.09	26.08	23.9	24.64	25.77	21.65	19.53	20.57	20.97	22.3	20.55	746	647	745	647	662	1085	1273	953	1061	1000	702	899	712	553	593	668	784	780	637	604	531	515	710	745
LOC105223138	2.21	2.12	1.53	1.7	1.69	3.08	3.85	2.65	2.61	2.71	3.19	1.3	1.55	1.98	1.72	1.53	1.56	1.91	1.65	1.3	4.17	1.33	2.86	1.81	0.54	52	42	36	35	34	57	96	44	49	58	57	28	25	28	28	26	34	40	27	24	75	22	64	40
LOC105223139	0.12	0.03	0	0	0.06	0	0.07	0	0	0	0	0	0	0	0	0	0	0	0	0	0.07	0.07	0	0.06	0.07	5	1	0	0	2	0	3	0	0	0	0	0	0	0	0	0	0	0	0	0	2	2	0	2
LOC105223140	18.3	17.68	17.67	17.7	17.52	45.75	45.89	41.89	40.95	39.18	21.27	23.62	21.68	19.25	20.07	19.54	22.36	22.89	21.21	19.34	20.95	20.37	18.03	19.17	20.28	556	454	537	470	455	1096	1480	900	994	1086	491	658	453	352	422	428	628	619	448	461	487	437	521	548
LOC105223141	60.46	68.54	67.1	55.3	59	31.69	31.56	39.53	32.49	37.57	23.77	24.68	27.27	28.14	24.22	19.77	23.5	21.34	22.54	22.21	21.81	22.09	20.8	23.17	21.55	3542	3393	3933	2832	2954	1464	1963	1638	1521	2008	1058	1326	1099	992	982	835	1273	1113	918	1021	978	914	1159	1277
LOC105223142	4.11	3.48	3.62	4.01	3.18	3.84	4.58	3.28	3.36	4.09	5.54	5.23	4.8	3.66	4.49	5.82	6.41	6.24	6.23	7.89	7.48	6.96	7.46	8.06	7.87	239	171	211	204	158	176	283	135	156	217	245	279	192	128	181	244	345	323	252	360	333	286	413	441
LOC105223143	2.02	1.85	1.94	2.24	1.81	4.15	3.5	4.77	5.1	4.53	5.49	5.65	5.98	5.03	5.17	3.75	4.49	5.28	4.66	5.19	5.05	5.15	4.94	4.37	5.08	106	82	102	103	81	172	195	177	214	217	219	272	216	159	188	142	218	247	170	214	203	191	247	216
LOC105223144	0.8	1.02	0.68	0.8	0.62	1.93	1.47	1.76	1.75	2.43	2.61	3.17	2.6	3.71	3.49	3.29	2.98	2.95	3.13	3.95	3.94	3.98	3.13	3.59	3.02	57	62	49	50	38	109	112	89	100	159	142	208	128	160	173	170	197	188	156	222	216	201	213	242
LOC105223145	0	0	0	0	0	0	0	0	0	0	0	0	0.05	0	0	0	0	0	0	0.05	0	0	0.04	0.11	0	0	0	0	0	0	0	0	0	0	0	0	0	1	0	0	0	0	0	0	1	0	0	1	3
LOC105223146	0.06	0	0	0	0	0	0	0	0	0	0	0	0	0	0	0	0	0	0	0	0	0	0	0	0	1	0	0	0	0	0	0	0	0	0	0	0	0	0	0	0	0	0	0	0	0	0	0	0
LOC105223147	0.53	0.33	0.48	0.67	0.33	0.97	1.51	1.76	1.85	1.14	3.96	4.05	3.78	2.33	2.5	2.37	2.97	2	3.48	2.14	3.26	1.41	1.37	1.73	2.29	21	11	19	23	11	30	63	49	58	41	118	146	102	55	68	67	108	70	95	66	98	39	51	64
LOC105223148	6.82	5.63	6.04	5.7	6.19	4.9	6.53	4.55	5.04	5.53	7.64	8.76	5.17	7.39	9	12.87	12.54	12.95	13.3	14.63	19.1	18.43	16.35	17.63	18.43	422	294	374	308	327	239	429	199	249	312	359	497	220	275	385	574	717	713	572	710	904	805	962	1026
LOC105223149	10.3	9.46	9.74	10.59	10.52	12.19	10.83	11.87	12.81	12.43	10.61	10.84	11.04	10.92	10.84	10.89	8.09	10.62	9.94	10.29	10.73	11.67	10.19	10.87	10.17	465	357	431	418	398	427	505	366	459	500	355	444	339	296	337	345	333	419	312	361	360	368	427	459
LOC105223150	5.31	6.11	3.97	5.19	4.5	9.05	9	10.19	8.86	9.83	15.54	15.44	14.59	15.7	17.9	18.11	15.91	14.03	15.59	15.91	18.78	18.41	15.41	16.62	17.53	164	166	124	139	118	214	278	223	224	286	362	450	311	287	381	391	468	383	349	398	469	402	441	482
LOC105223151	0	0.02	0	0.05	0.05	0	0.02	0	0.02	0	0.08	0.06	0.14	0	0	0.08	0.06	0.02	0.09	0.03	0.08	0.08	0.06	0.08	0.2	0	1	0	2	2	0	1	0	1	0	3	3	5	0	0	3	3	1	3	1	3	3	3	4
LOC105223152	0.83	0.72	1	0.83	1.07	0.33	0.45	0.51	0.26	0.31	0.41	0.42	0.45	0.19	0.22	0.66	0.38	0.22	0.31	0.25	0.44	0.29	0.35	0.44	0.2	64.62	47.31	78.6	56.52	71.55	20.21	37.19	28.13	16.17	22.19	24.17	30.21	24.25	9.07	12.12	37.28	27.16	15.06	17.11	15.1	26.18	16.12	26.14	32.21
LOC105223153	0.02	0.02	0	0.11	0.02	0.08	0.03	0.04	0.02	0	0.02	0	0.05	0	0	0.11	0	0.05	0.02	0	0.06	0.04	0.02	0	0.04	1	1	0	6	1	4	2	2	1	0	1	0	2	0	0	5	0	3	1	0	3	2	1	0
LOC105223154	0	0.04	0	0.12	0	0.09	0	0.21	0.09	0.04	0.14	0	0.05	0.06	0.26	0	0	0.04	0	0	0	0.1	0.04	0.04	0.09	0	1	0	3	0	2	0	4	2	1	3	0	1	1	5	0	0	1	0	0	0	2	1	1
LOC105223155	4.46	5.49	5.04	5.45	5.9	4.96	5.48	5.92	4.96	5.11	4.39	4.76	4.23	3.83	4.6	3.34	3.8	3.01	3.86	2.65	4	3.73	5.3	4	4.12	178	185	201	190	201	156	232	167	158	186	133	174	116	92	127	96	140	107	107	83	122	105	201	150
LOC105223156	0.05	0.05	0.03	0.02	0.1	0	0	0	0.12	0.06	0	0	0	0.02	0.02	0.02	0.03	0	0.02	0.02	0.02	0	0.01	0.04	0	4	3	2	1	6	0	0	0	7	4	0	0	0	1	1	1	2	0	1	1	1	0	1	3
LOC105223157	0	0	0	0	0.03	0	0	0	0	0.03	0	0	0	0	0	0	0	0.03	0	0	0	0	0	0.07	0	0	0	0	0	1	0	0	0	0	1	0	0	0	0	0	0	0	1	0	0	0	0	0	3
LOC105223158	0.29	0.38	0.52	0.45	0.23	0.29	0.15	0.05	0.37	0.21	0.43	0.04	0.05	0.11	0.23	0.23	0.18	0.36	0.19	0.33	0.68	0.09	0.24	0.03	0.12	9	10	16	12	6	7	5	1	9	6	10	1	1	2	5	5	5	10	4	8	16	2	7	1
LOC105223159	0	0	0	0	0	0	0	0	0	0	0	0	0	0	0	0	0	0	0	0	0	0	0	0	0	0	0	0	0	0	0	0	0	0	0	0	0	0	0	0	0	0	0	0	0	0	0	0	0
LOC105223160	4.79	4.57	5.1	4.14	4.81	3.72	4.18	3.9	3.17	3.82	3.78	4.4	4.16	3.73	3.41	5.42	5.09	4.69	4.81	5.16	4.12	4.68	5.53	4.7	4.7	572	462	610	433	491	351	530	330	303	417	343	482	342	268	282	467	562	499	400	484	377	395	629	528
LOC105223161	0.02	0	0	0	0	0.01	0.05	0.01	0.06	0.05	0.06	0.02	0.05	0.05	0.07	0.04	0	0.01	0.01	0.05	0.02	0.03	0.02	0.04	0.02	2	0	0	0	0	1	6	1	5	5	5	2	4	3	5	3	0	1	1	4	2	2	2	4
LOC105223163	0.03	0.06	0.04	0.06	0.02	0.02	0.03	0.07	0.15	0.08	0.06	0.03	0.02	0.02	0.02	0.07	0.02	0.03	0.03	0.06	0.04	0	0	0.03	0.04	5	7	6	8	2	2	5	7	17	10	6	4	2	2	2	7	3	4	3	7	4	0	0	4
LOC105223164	0	0	0	0	0	0	0.03	0	0	0	0	0.04	0	0	0	0	0.04	0	0	0.17	0	0	0	0	0	0	0	0	0	0	0	1	0	0	0	0	1	0	0	0	0	1	0	0	4	0	0	0	0
LOC105223166	0.02	0	0	0.07	0	0	0.1	0.03	0	0	0	0	0	0	0	0.03	0.02	0.02	0.03	0.06	0	0	0.02	0.02	0.03	1	0	0	3	0	0	5	1	0	0	0	0	0	0	0	1	1	1	1	2	0	0	1	1
LOC105223167	0.27	0.31	0.46	0.38	0.31	0.17	0.25	0.28	0.25	0.22	0	0.14	0	0.33	0.1	0	0.29	0.15	0	0.34	0.35	0	0.07	0.14	0.42	4	4	7	5	4	2	4	3	3	3	0	2	0	3	1	0	4	2	0	4	4	0	1	2
LOC105223168	0.03	0	0	0	0	0	0	0	0	0	0	0	0.1	0	0	0	0.04	0	0	0	0	0	0	0	0	1	0	0	0	0	0	0	0	0	0	0	0	2	0	0	0	1	0	0	0	0	0	0	0
LOC105223169	3.68	3.18	3.36	3.99	3.8	6.47	7.7	6.95	8.16	8.32	8.71	9.77	7.47	10.29	11.06	11.96	10.02	10.54	10.82	14.57	15.36	14.05	13.19	14.32	15.58	380	277	347	360	335	526	843	507	673	783	683	924	530	639	790	890	956	968	776	1179	1213	1024	1295	1390
LOC105223170	7.63	8.19	7.95	8.5	7.31	8.59	8.96	9.74	8.24	8.72	10.03	9.32	9.13	9.6	8.36	7.75	7.3	8.44	8.78	8.71	7.12	7.05	7.9	7.47	6.81	1692	1534	1763	1647	1384	1502	2108	1527	1460	1763	1689	1895	1393	1281	1282	1238	1497	1666	1353	1515	1208	1104	1666	1557
LOC105223172	0.76	0.62	0.38	0.36	0.39	1.09	1.08	0.67	1.88	2.57	1.62	1.69	0.62	2.02	2.9	1.67	0.47	1.74	0.66	2.78	2.39	3.37	1.37	1.98	2.39	69	48	35	29	30	78	104	43	137	214	112	141	39	111	183	110	40	141	42	199	167	217	119	170
LOC105223174	16.23	16.49	17.17	17.35	14.8	2.98	6.38	4.75	4.83	4.17	6.56	6.65	6.34	5.39	5.9	6.98	6.6	7.23	7.56	9.27	8.41	11.89	10.88	9.4	11.26	290	249	307	271	226	42	121	60	69	68	89	109	78	58	73	90	109	115	94	130	115	150	185	158
LOC105223175	16.39	15.66	12.7	14.14	13.75	4.46	4.85	3.85	4.28	5.05	4.67	4.14	5.01	5.81	5.03	5.65	4.53	5.93	6.36	6.02	6.28	6.4	6.66	6.05	5.89	993	802	770	749	712	213	312	165	207	279	215	230	209	212	211	247	254	320	268	286	291	274	384	345
LOC105223176	241.64	223.02	224.94	226.48	218.25	221.93	205.85	218.6	220.57	223.71	226.66	208.33	190.79	201.81	212.39	182.68	172.26	155.58	157.3	150.43	139.97	139.34	162.43	151.34	149.01	3104	2421	2891	2543	2396	2248	2807	1986	2264	2622	2212	2454	1686	1560	1888	1692	2046	1779	1405	1516	1376	1264	1985	1829
LOC105223177	0	0	0	0	0.05	0.16	0.12	0	0.05	0.05	0.06	0.09	0.12	0.07	0	0.18	0	0.1	0.06	0.16	0.11	0.67	0.13	0.18	0.11	0	0	0	0	1	3	3	0	1	1	1	2	2	1	0	3	0	2	1	3	2	11	3	4
LOC105223178	14.07	14.59	16.48	13.87	16.72	6.9	9.79	8.61	6.84	7.59	9.7	9.58	6.1	7.15	8.53	12.5	11.35	10.14	11.12	11.14	11.48	11.22	9.04	12.36	10.69	881.87	772.9	1033.91	760	895.91	340.91	651.85	381.89	342.74	434	462	551	263	269.88	370	565	658	566	484.89	547.79	551	496.9	538.95	728.79
LOC105223179	32.67	33.7	32.93	32.9	32.67	34.93	32.83	31.38	36.34	32.59	27.13	27.71	26.45	31.08	26.29	25.49	21.89	26.45	27.57	26.81	23.96	26.69	23.67	23.2	23.84	702	612	708	618	600	592	749	477	624	639	443	546	391	402	391	395	435	506	412	452	394	405	484	469
LOC105223180	0	0.06	0	0.11	0	0	0.31	0	0	0	0	0	0	0	0.05	0.1	0.19	0.08	0	0.19	0.07	0.18	0.03	0	0.04	0	2	0	3.95	0	0	13	0	0	0	0	0	0	0	1.52	2.82	6.88	2.94	0	5.91	2	5	1	0
LOC105223181	0	0	0	0.08	0	0	0	0	0.16	0.14	0.08	0.21	0.19	0	0.23	0.19	0.01	0.15	0	0.01	0	0	0	0.14	0.05	0	0	0	1.05	0	0	0	0	2	2	1	3	2	0	2.48	2.18	0.12	2.06	0	0.09	0	0	0	2
LOC105223182	0.08	0	0	0.09	0	0.1	0	0	0	0	0	0	0.11	0.38	0.22	0.11	0.08	0	0.11	0	0.1	0.11	0.08	0	0.1	1	0	0	1	0	1	0	0	0	0	0	0	1	3	2	1	1	0	1	0	1	1	1	0
LOC105223183	12.04	12.04	12.37	13.62	13.33	1.54	2.9	1.43	3.43	2.93	3.78	4.42	3.49	3.54	4.06	4.69	4.02	3.65	6.03	5.6	5.21	5.55	7.18	7.04	6.67	356	301	366	352	337	36	91	30	81	79	85	120	71	63	83	100	110	96	124	130	118	116	202	196
LOC105223184	15.13	13.26	14.69	13.85	12.77	9.6	8.42	7.79	8.52	9.12	9.3	9.86	8.38	8.44	7.13	10.74	9.98	10.2	9.07	9.37	11.11	11.68	9.54	12.6	11.9	420	311	408	336	303	210	248	153	189	231	196	251	160	141	137	215	256	252	175	204	236	229	252	329
LOC105223185	12.33	12.65	12.97	12.4	11.96	9.01	10.73	9.32	10.06	10.26	10.43	11.1	11.2	12.17	10.63	13.23	13.13	13.29	14.2	13.31	14.73	14.62	14.24	15.41	15.23	739	641	778	650	613	426	683	395	482	561	475	610	462	439	441	573	728	709	592	626	676	619	812	869
LOC105223186	103.04	103.08	101.59	93.5	97.89	37.42	49.06	37.79	38.62	37.93	35.31	42.98	33.42	34.67	40.22	58.78	61.1	52.06	58.83	65.77	68.89	73.31	77.95	72.97	78.31	9192	7771	9067	7291	7463	2632	4646	2384	2753	3087	2393	3516	2051	1861	2483	3781	5040	4134	3649	4603	4703	4618	6615	6124
LOC105223187	0.15	0.08	0.17	0.08	0	0	0.4	0.67	1.06	1.17	0.22	0	0.12	0.42	0.12	0.1	0.09	0.08	0	0.22	0.11	0.24	0	0	0.11	2	1	2	1	0	0	5	6	10	14	2	0	1	3	1	1	1	1	0	2	1	2	0	0
LOC105223188	21.95	18.4	16.16	18.05	16.75	2.19	3.74	2.04	2	2.72	3.47	3.89	2.29	1.62	3.3	5.01	4.19	4.38	5.93	6.58	8.51	8.38	8.13	7.16	8.72	991	702	730	712	646	78	179	65	72	112	119	161	71	44	103	163	175	176	186	233	294	267	349	304
LOC105223189	23.39	23.72	22.09	24.77	21.67	28.87	25.54	26.33	27.1	28.61	24.28	22.55	21.1	22.56	21.43	20.18	20.18	20.57	19.97	19.12	20.79	18.63	20.01	18.35	17.31	672	576	635	622	532	654	779	535	622	750	530	594	417	390	426	418	536	526	399	431	457	378	547	496
LOC105223190	841.59	751.56	708.89	772.61	674.66	741.97	610.78	699.89	734.54	656.7	532.18	532.77	490.65	502.87	550.73	406.2	433.01	382.12	367.75	340.73	319.52	314.97	388.05	343.13	346.51	8342	6289	7034	6672	5703	5693	6256	4810	5688	5808	3873	4724	3255	2919	3673	2811	3856	3264	2453	2566	2337	2118	3526	3077
LOC105223191	7.9	7.5	7.55	7.29	6.73	6.81	8.23	6.12	7.24	7.56	9.03	9.79	7.76	7.83	10.77	10.28	12.78	10.51	11.26	10.6	13.63	13.05	11.15	12.04	12.63	228	183	218	184	166	155	252	125	167	199	198	259	154	136	215	214	341	270	226	240	301	266	306	327
LOC105223192	260.05	231.46	280.39	302.2	289.42	355.48	439.05	283.02	269.79	235	325.31	298.5	294.41	246.54	227.22	500.77	564.52	480.42	479.59	499.61	507.04	486.84	424.98	500.01	484.03	19061	14308	20605	19376	18142	20371	34079	14538	15738	15618	17873	19810	14652	10737	11401	26182	37977	31040	24201	28461	28102	24870	29125	33982
LOC105223193	22.21	21.94	21.24	22.44	20.12	6.66	13.8	5.85	7.97	8.24	13.41	13.93	10.64	11.31	13.34	17.39	22.21	18.96	21.06	18.72	21.89	19.1	20.37	26.61	20.84	558	466	534	493	432	132	368	104	160	189	256	321	184	171	232	315	516	424	368	369	421	339	487	629
LOC105223194	1.18	1.32	0.93	1.23	0.96	2.16	1.99	2.44	3.12	2.95	3.52	3.35	2.81	3.71	2.71	3.7	3.22	3.53	4.06	3.94	2.68	3.2	3.47	4.16	3.48	46	43	36	38	32	65	82	67	97	102	98	115	73	84	71	102	113	122	106	120	78	85	122	144
LOC105223196	4.39	4.24	3.67	4.38	3.66	2.74	3.57	2.58	3.1	2.96	3.32	3.49	3.83	3.26	2.96	3.97	4.24	5.24	4.31	5.14	5.5	5.71	6.39	5.32	6.19	195	159	163	170	139	96	168	81	110	120	112	142	117	87	91	127	174	207	133	179	187	179	270	222
LOC105223198	3.09	3.28	3.53	4.07	3.24	2.66	3.22	3.09	3.03	2.65	3.11	2.86	2.37	2.62	2.74	2.35	3.22	2.92	2.81	3.05	3.85	3.72	2.91	3.5	3.14	106	95	121	122	95	72	117	75	83	83	81	90	56	54	65	58	102	89	67	82	101	90	95	113
LOC105223199	3.71	3.48	3.34	4.1	4.18	1.95	2.81	2.18	2.07	2.45	2.91	3.26	2.7	3.06	2.65	3.63	3.95	4.01	3.97	3.71	4.14	4.43	4.53	4.35	4.04	292	231	263	282	281	121	235	121	130	176	174	235	146	145	144	206	287	281	217	229	249	246	339	322
LOC105223200	48.43	45.46	42.28	48.1	40.92	79.61	65.26	75.97	75.1	69.54	85.8	76.03	81.65	84.18	83.46	71.61	74.59	79.52	77.01	62.56	76.97	69.72	75.85	63.54	65.22	695	547	606	605	502	898	996	774	864	912	934	998	804	723	831	739	988	1014	769	705	841	703	1037	857
LOC105223201	0	0	0	0	0	0	0	0	0	0	0	0	0	0	0	0	0	0	0	0	0	0	0	0	0	0	0	0	0	0	0	0	0	0	0	0	0	0	0	0	0	0	0	0	0	0	0	0	0
LOC105223202	21.57	16.96	18.82	21.14	20.31	25.84	20.32	21.26	22.77	21.41	18.59	21.07	24.1	20.78	21.93	20.46	21.28	21.63	19	16.66	19.37	18.61	16.84	18.74	19.29	307	204	268	263	247	290	307	214	259	278	201	275	236	178	216	210	280	274	188	186	211	187	228	251
LOC105223204	0	0	0	0	0	0	0	0	0	0	0	0	0	0	0	0	0	0	0	0	0	0	0	0	0	0	0	0	0	0	0	0	0	0	0	0	0	0	0	0	0	0	0	0	0	0	0	0	0
LOC105223205	7.16	7.3	7.38	7.95	7.36	1.58	3.06	2.06	2.13	2.44	2.82	2.69	2.89	2.61	3.19	4.08	2.84	3.98	4.21	4.37	4.74	4.18	4.28	3.63	3.91	447	386	461	434	398	78	203	91	107	139	135	156	124	98	138	186	165	221	183	215	230	186	254	213
LOC105223206	16.42	15.7	16.69	14.44	16.14	9.73	11.16	9.01	7.89	7.99	10.59	12.05	7.93	8.73	11.31	16.89	17.7	16.48	18.42	18.31	18.34	18.15	16.61	17.15	18.8	1479	1194	1501	1134	1241	690	1066	572	568	655	723	995	490	471	704	1095	1471	1318	1150	1291	1263	1151	1420	1450
LOC105223207	0.04	0	0.04	0	0	0	0	0.11	0	0.04	0	0	0	0	0.34	0.33	0.04	0.18	0	0.15	0.15	0.06	0.04	0.29	0.15	1	0	1	0	0	0	0	2	0	1	0	0	0	0	6	6	1	4	0	3	3	1	1	7
LOC105223208	13.85	12.76	11.04	12.33	13.55	22.88	22.62	22.3	23.14	21.48	19.88	21.47	21.82	22.21	23.82	19.83	21.97	23.87	23.19	21.35	22	21.7	17.33	17.52	20.35	311	242	248	242	260	405	539	354	415	440	339	442	337	300	370	321	456	477	362	376	378	344	370	370
LOC105223209	4.19	3.74	3.44	3.46	3.53	2.2	3.19	2.27	2.13	2.88	3.09	3.22	2.78	3.09	3.17	4.57	3.94	4.6	4.7	5.57	6.12	6.49	6.41	6.35	6.23	624.35	470.05	512.73	449.75	448.98	258.82	504.12	238.75	253.02	391.62	349.79	439.05	285.12	276.38	326.12	490.45	541.73	609.37	486.11	650.94	697.54	681.82	908.37	889.86
LOC105223210	419.36	256.78	293.59	335.53	298.45	358.85	286.73	243.19	386.14	278.87	286.65	282.02	249.35	289.92	381.29	249.87	253.19	237.2	231.19	219.23	191.72	173.07	241.38	221.65	225.01	2721	1408	1906	1903	1655	1836	1975	1116	2002	1651	1413	1678	1113	1132	1712	1169	1519	1370	1043	1116	952	793	1490	1353
LOC105223211	3.9	4.58	4.47	4.3	4.75	6.81	7.56	5.97	5.66	6.03	8.05	6.35	5.67	7.3	5.95	5.1	5.04	6.85	6.06	5.1	6.18	5.28	5.23	4.68	4.17	125.65	124.95	144.27	121.25	131.02	173.18	258.88	136.25	145.98	177.38	197.21	187.95	125.88	141.62	132.88	118.55	150.27	196.63	135.89	129.06	152.46	120.18	160.63	142.14
LOC105223212	3.6	2.73	2.7	3.14	3.23	2.04	2.44	1.74	1.97	2.09	1.73	1.95	1.54	1.3	1.71	2.36	2.2	2.42	2.39	3.19	3.07	3.74	2.49	2.38	2.77	405	259	304	309	310	181	291	138	177	214	148	201	119	88	133	191	229	242	187	281	264	297	266	252
LOC105223213	0.04	0	0	0.23	0	0	0	0	0	0	0.03	0.05	0	0	0	0.14	0	0	0	0.14	0.17	0.04	0.09	0.09	0.13	2	0	0	8	0	0	0	0	0	0	1	2	0	0	0	4	0	0	0	5	6	1	4	4
LOC105223214	15.35	15.9	14.21	15.87	13.55	12.58	12.96	13.11	12.71	12.96	15.14	13.51	12.62	14.07	12.27	12.34	13.43	13.44	13.14	13.19	14.54	13.47	17.4	16.14	14.79	571	500	529	516	431	369	512	345	378	440	428	461	323	315	316	331	462	445	340	385	414	354	616	565
LOC105223215	11.42	11.99	9.63	10.38	10.69	12.82	16.25	12.97	16.38	17.39	18.62	17.64	17.21	17.28	19.99	22.78	22	22.27	22.3	25.41	25.65	25.43	24.73	24.33	22.46	595	528	502	473	476	527	899	478	682	827	737	843	617	542	721	856	1060	1033	808	1039	1023	936	1226	1193
LOC105223216	0.1	0.07	0.03	0.08	0.11	0.26	0.12	0.18	0.31	0.17	0.37	0.28	0.6	0.31	0.47	0.63	0.1	0.31	0.6	0.45	0.3	0.13	0.12	0.44	0.53	4	2	1	3	4	9	4	5	8	5	9	11	14	8	14	17	4	12	18	12	10	4	5	18
LOC105223217	3.32	2.7	3.14	3.2	2.95	3.59	3.83	3.37	4.36	4.4	4.47	3.06	3.51	3.69	3.38	3.19	3.19	2.73	2.43	2.69	2.87	2.93	2.38	2.84	2.69	141	96	134	121	112	126	181	102	151	175	151	125	104	97	104	102	131	108	72	91	97	88	97	119
LOC105223218	78.05	76.61	81.6	83.48	75.8	57.8	60.45	57.95	59.47	61.63	69.5	69.32	67.84	73.4	76.13	82.35	78.39	84.74	82.09	92.03	101.36	96.14	89.42	103.72	91.65	1935	1605	2024	1809	1606	1130	1591	1016	1178	1394	1309	1576	1157	1095	1306	1472	1797	1870	1415	1790	1923	1683	2109	2419
LOC105223219	14.1	16.39	16.02	16	16.11	17.49	20.44	19.22	18.41	19.52	23.01	23.69	23.9	24.59	23.24	27.49	27.63	27.79	28.51	26.94	31.78	31.08	25.47	32.23	31.61	505	496	574	501	493	494	777	487	527	638	626	778	589	530	576	710	915	886	710	757	871	786	868	1086
LOC105223220	29.8	26.27	25.84	26.89	26.85	14.66	18.11	14.41	17.87	22.77	16.46	17.89	12.1	16.29	17.01	24.85	18.43	22.26	18.43	26.22	31.65	31.08	26.11	26.67	29.8	2338	1744	2059	1840	1806	923	1568	811	1173	1721	1013	1323	670	790	962	1453	1370	1603	1031	1692	2023	1800	1990	2041
LOC105223221	37.93	38.17	37.7	36.27	35.31	29.45	31.67	32.54	35.37	30.97	27.41	31.43	31.53	31.66	30.74	26.42	29.63	27.02	28.8	27.87	26.48	25.8	32.34	30.56	29.07	1091	928	1085	912	868	668	967	662	813	813	599	829	624	548	612	548	788	692	576	629	583	524	885	827
LOC105223222	12.06	11.34	11.36	11.76	11.63	7.97	9.55	8.69	8.5	7.28	9.45	10.7	9.88	9.98	8.59	14.21	14.51	13.16	13.45	14.52	13.96	15.12	14.74	15.76	14.49	779	619	734	664	642	406	655	397	439	429	464	634	439	388	384	662	867	757	604	736	690	690	906	958
LOC105223223	0	0	0	0	0	0.05	0.05	0	0.13	0.01	0.04	0.08	0.05	0.09	0.05	0.11	0.26	0.23	0.15	0.24	0.25	0.41	0.28	0.16	0.24	0	0	0	0	0	4	5	0	10	1	3	7	3	5	3	8	23	20	10	18	18	29	26	15
LOC105223224	4.04	3.95	3.72	4.32	3.74	10.17	11.16	9.98	10.61	12.03	13.53	14.03	12.16	9.41	13.89	14.02	11.81	15.79	13.7	13.4	13.25	10.9	17.71	13.86	12.71	139	115	128	130	110	276	408	243	292	378	354	443	288	195	331	348	376	484	328	362	349	265	580	449
LOC105223225	12.84	13.46	11.81	13.15	12.7	6.95	9.13	6.31	8.29	9.44	12.45	12.2	14.19	12.34	12.24	16.08	14.52	16.89	17.87	17.69	14.79	14.96	14.91	15.21	14.49	884	783	813	791	747	377	667	307	456	593	651	770	672	511	583	798	924	1035	855	955	779	727	976	985
LOC105223226	28.43	19.68	22.52	32.64	23.95	44.29	47.27	37.7	55.78	46.8	39.37	39.91	42.91	43.16	46.78	34.8	42.56	37.25	32.54	34.74	33.3	36.09	33.92	31.16	35.35	289	169	229	290	208	355	510	271	453	434	304	372	300	264	329	255	400	337	230	277	259	259	328	298
LOC105223227	103.49	104.62	105.41	91.62	103.13	65.29	107.79	64.84	68.07	75.78	98.13	105.28	83.33	80.62	97.49	132.89	127.99	126.19	132.84	144.63	141.68	148.54	150.27	151.09	147.29	7012	5990	7146	5426	5972	3488	7753	3107	3685	4685	5051	6541	3884	3287	4571	6492	8018	7611	6258	7688	7346	7107	9686	9631
LOC105223228	5.86	5.84	4.98	5.47	6.57	3.41	5.66	4.42	4.58	4.39	6.43	6.23	4.4	4.54	5.36	4.94	7.82	7.68	8.01	10.15	9.12	8.16	7.6	7.53	6.55	120	101	102	98	115	55	123	64	75	82	100	117	62	56	76	73	148	140	114	163	143	118	148	145
LOC105223229	0.25	0.08	0.18	0.15	0.24	0.28	0.23	0.16	0.06	0.2	0.21	0.12	0.1	0	0.29	0.41	0.17	0.23	0.39	0.2	0.18	0.25	0.28	0.24	0.65	11	3	8	6	9	10	11	5	2	8	7	5	3	0	9	13	7	9	12	7	6	8	12	10
LOC105223230	0	0.03	0	0	0	0.18	0.3	0.2	0.29	0.16	0.53	0.44	0.38	0.53	0.33	0.2	0.34	0.32	0.12	0.37	0.3	0.04	0.24	0.67	0.4	0	1	0	0	0	5	11	5	8	5	14	14	9	11	8	5	11	10	3	10	8	1	8	22
LOC105223231	0	0	0	0.04	0	0	0	0	0	0	0	0	0	0	0	0	0	0	0	0	0	0	0	0	0	0	0	0	1	0	0	0	0	0	0	0	0	0	0	0	0	0	0	0	0	0	0	0	0
LOC105223232	0.28	0.52	0.06	0.21	0	13.03	11.06	9.01	6.92	8.97	12.25	6.85	10.99	11.94	8.49	3.6	3.95	5.51	4.18	3.34	3.02	2.79	4.63	3.59	2.53	9	14	2	6	0	329	376	204	177	262	298	201	242	230	188	83	117	157	93	84	74	63	141	108
LOC105223233	0	0	0	0.11	0	0	0.05	0	0	0	0	0	0.14	0	0	0	0	0	0	0	0	0	0	0	0	0	0	0	2	0	0	1	0	0	0	0	0	2	0	0	0	0	0	0	0	0	0	0	0
LOC105223234	4.56	5.01	5.98	7.4	5.24	6.56	6.25	4.89	4.18	5.31	4.45	3.6	5.21	4.33	4.76	3.78	6.38	3.89	4.04	5.34	4.41	3.92	6.68	3.85	4.02	112	104	147	159	110	127	163	85	82	119	83	81	88	64	81	67	145	85	69	103	83	68	156	89
LOC105223235	0.12	0.26	0.25	0.14	0.22	0.2	0.38	0.04	0.04	0.03	0.28	0.13	0.13	0.1	0	0.04	0.2	0.14	0.18	0.16	0	0	0.06	0.03	0	4	7	8	4	6	5	13	1	1	1	7	4	3	2	0	1	6	4	4	4	0	0	2	1
LOC105223236	6.35	6.2	6.15	6.53	8.12	11.72	6.73	8.38	9.54	9.6	10.44	10.79	9.97	8.64	12.07	8.59	10.15	9	9.57	8.69	7.88	8.45	10.4	8.58	9.24	314	259	304	282	343	457	353	293	377	433	392	489	339	257	413	306	464	396	329	337	298	295	489	399
LOC105223237	0.98	0.93	0.72	0.42	0.58	0.45	0.39	0.38	0.58	0.47	0.51	0.73	0.47	0.43	0.44	0.29	0.62	0.56	0.83	0.63	0.86	0.86	0.81	0.95	0.91	61	49	45	23	31	22	26	17	29	27	24	42	20	16	19	13	36	31	36	31	41	38	48	56
LOC105223238	1.07	1.02	1.38	0.94	1.13	0.62	0.74	0.84	0.73	0.67	1.05	1.03	0.82	0.97	1.09	1.63	1.23	1.23	1.13	1.35	1.16	1.15	0.94	1.09	1.21	112	90	144	86	101	51	82	62	61	64	83	99	59	61	79	123	119	114	82	111	93	85	93	107
LOC105223239	0	0.62	0.74	0.6	0.62	0.4	0.8	0	1.06	0.81	0.69	0.81	0.31	0.18	0.46	0.15	0.34	0.83	0.91	0.54	0.55	1.79	0.44	0.67	0.8	0	5	7	5	5	3	8	0	8	7	5	7	2	1	3	1	3	7	6	4	4	12	4	6
LOC105223240	12.67	13.66	14.45	15.9	13.29	9.17	8.93	6.24	10.93	7.61	10.63	9.32	6	8.58	8.41	8.85	6.8	8.33	9.59	9.69	6.38	9.44	8.49	8.08	7.48	135	123	154	148	121	77	101	47	93	74	86	91	44	55	62	68	67	79	71	81	52	71	86	81
LOC105223241	30.68	30.55	29.4	29.53	29.55	43.56	36.01	36.3	42.02	38.65	33.05	33	31.79	33.76	35.47	33.07	32.57	27.81	29.93	30.3	32.08	26.67	27.14	25.87	27.58	435	366	417	366	358	487	542	364	476	500	356	429	310	288	348	338	427	351	295	337	348	267	366	345
LOC105223242	1.96	1.84	2.07	1.94	1.55	1.2	2.04	1.48	1.87	1.71	1.43	1.4	1.38	1.29	1.81	1.69	0.95	1.14	1.17	1.77	2.08	1.63	1.57	1.33	2.01	58	46	61	50	39	28	64	31	44	46	32	38	28	23	37	36	26	30	24	41	47	34	44	37
LOC105223244	23.39	23.58	23.02	22.82	23.97	55.54	63.76	52.81	59.32	48.52	90.04	65.74	79.8	73.91	70.53	81.63	89.82	94.19	75.11	70.43	72.55	75.34	96.86	91.41	67.28	1129	962	1112	963	989	2114	3267	1803	2288	2137	3302	2910	2650	2147	2356	2841	4009	4047	2521	2667	2680	2568	4448	4151
LOC105223245	10.49	10.07	9	9.74	9.25	12.57	15.7	14.05	14.26	14.62	20.7	18.24	16.31	21.17	21.19	22.55	19.14	21.78	20.31	26.85	23.91	24.19	24.9	23.52	23.51	2218	1799	1903	1800	1671	2095	3523	2100	2408	2820	3324	3535	2372	2693	3099	3436	3740	4098	2985	4453	3867	3610	5007	4676
LOC105223246	44.81	43.3	40.15	43.79	43.23	37.28	50.65	37.2	48.17	41.66	59.79	54.83	54.16	54.94	62.58	69.06	72.28	69.53	79.61	80.91	84.1	86.14	82.59	83.94	86.12	1015	829	910	867	837	666	1218	596	872	861	1029	1139	844	749	981	1128	1514	1402	1254	1438	1458	1378	1780	1789
LOC105223247	7.26	5.28	4.49	5.75	5.3	5.31	4.5	3.64	5.27	4.91	5.04	5.28	6.59	3.03	3.82	3.28	3.95	2.82	3.34	5.16	5.19	5.34	7.05	4.23	3.85	493	303	304	341	308	288	328	176	288	307	262	330	307	125	179	162	250	169	159	275	270	259	456	276
LOC105223248	0	0.03	0	0.03	0	0	0	0	0	0	0	0.03	0	0	0	0	0.03	0	0	0.07	0	0	0.03	0	0	0	1	0	1	0	0	0	0	0	0	0	1	0	0	0	0	1	0	0	2	0	0	1	0
LOC105223249	0	0.05	0	0.19	0.1	0	0	0	0.1	0	0	0	0	0	0	0	0.09	0	0	0	0	0	0	0.04	0	0	1	0	4	2	0	0	0	2	0	0	0	0	0	0	0	2	0	0	0	0	0	0	1
LOC105223250	22.95	26.02	24.65	22.14	25.22	24.33	26.43	25.42	20.91	24.13	25.56	28.03	21.74	22.54	25.05	31.75	30.3	26.95	28.61	31.71	30.12	29.58	33.7	32.8	33.6	1893	1833	2057	1579	1784	1591	2356	1484	1398	1829	1604	2137	1213	1136	1409	1838	2274	1986	1638	2054	1899	1718	2573	2520
LOC105223251	26.66	29.58	24.98	29.46	24.66	53.24	53.78	48.34	60.95	61.21	53.07	46.54	48.45	51.81	55.31	50.55	45.75	49.1	44.14	49.4	47.91	48.87	52.21	47.48	41.83	496	465	465	479	392	781	1062	636	906	1039	750	794	620	580	712	678	787	813	571	721	682	642	924	831
LOC105223252	0.39	0.29	0.32	0.42	0.43	0.1	0.19	0.29	0.23	0.23	0.3	0.32	0.2	0.41	0.4	0.56	0.39	0.47	0.47	0.64	0.91	0.71	0.32	0.58	0.48	46	29	38	44	44	9	24	24	22	25	27	35	16	29	33	48	43	50	39	60	83	60	36	65
LOC105223253	0.03	0	0	0	0	0	0	0.05	0	0	0	0	0	0	0	0	0	0.04	0	0	0.09	0	0.04	0.04	0	1	0	0	0	0	0	0	1	0	0	0	0	0	0	0	0	0	1	0	0	2	0	1	1
LOC105223254	16.31	15.14	16.3	17.65	10.97	13.38	15.18	13.95	15.89	14.13	10.67	13.21	11.36	14.12	15.38	15.04	10.67	15.03	11.8	12.82	17.61	14.94	12.63	15.78	14.95	167	131	167	158	96	108	165	101	130	132	83	124	80	87	109	111	101	137	84	103	138	108	123	152
LOC105223255	0.27	0.16	0.16	0.13	0.17	0.22	0.21	0.11	0.19	0.19	0.18	0.15	0.08	0.16	0.08	0.25	0.22	0.15	0.12	0.11	0.25	0.13	0.18	0.17	0.17	28	14	17	12	15	18	23	8	16	18	14	14	6	10	6	19	21	14	9	9	20	10	18	17
LOC105223256	0	0	0	0	0	0	0	0	0	0	0	0	0	0	0	0.11	0	0	0.11	0.1	0	0	0.08	0	0	0	0	0	0	0	0	0	0	0	0	0	0	0	0	0	1	0	0	1	1	0	0	1	0
LOC105223257	8.26	8.15	8.41	8.51	8.84	12.88	14.67	12.03	11.39	13.47	13.33	15.02	14.5	13.71	13.91	15.92	15.24	16.95	17.58	18.35	17.64	19	19.74	19.09	16.71	540	450	550	486	494	664	1018	556	595	803	662	900	652	539	629	750	921	986	799	941	882	877	1227	1174
LOC105223258	0	0	0	0	0	0	0	0	0	0	0	0	0	0	0	0	0	0	0	0	0	0	0	0	0	0	0	0	0	0	0	0	0	0	0	0	0	0	0	0	0	0	0	0	0	0	0	0	0
LOC105223259	0.96	0.72	1.01	0.52	0.95	1.22	0.52	1	1.01	1.33	0.2	0.5	0.15	0.08	0.22	0.14	0.49	0.34	0.15	0.19	0.46	0.36	0.9	0.38	0.32	19	12	20	9	16	19	11	14	16	24	3	9	2	1	3	2	9	6	2	3	7	5	17	7
LOC105223260	42.05	44.36	43.86	43.74	38.2	71.36	79.63	89.06	75.86	69.82	32.4	33.12	36.41	38.07	36.73	43.48	35.92	31.79	29.53	26.53	33.06	27.28	34.68	32.12	37.2	1030	925	1081	942	804	1380	2072	1542	1486	1561	605	744	618	562	622	773	815	695	504	509	619	476	807	743
LOC105223261	73.55	74.74	77.09	69.27	77.45	82.36	83.14	88.51	78.43	78.45	50.52	60.57	53.75	52.61	52.47	52.13	55.12	56.15	57.67	53.73	55.56	58.71	59.51	58.41	63.58	2790	2400	2901	2290	2489	2485	3352	2378	2399	2733	1466	2119	1400	1206	1383	1431	1940	1895	1522	1605	1607	1594	2130	2080
LOC105223262	11.08	11.48	11.06	11.22	12.17	12.12	13.16	11.6	13.91	11.69	15.67	16.02	16.86	15.06	15.83	18.66	17.86	18.15	18.5	18.93	19.24	20.4	19.29	20	17.77	620	543	619	549	582	535	782	459	622	597	666	822	649	507	613	753	924	904	720	831	824	806	1027	1053
LOC105223263	44.39	43.26	45.96	45.69	46.88	71.3	83.86	81.6	78.97	79.07	86.55	82.32	96.3	85.98	84.55	73.76	88.61	87.29	90.71	89.71	79.27	79.26	78.05	79.43	77.76	2028	1656	2071	1806	1817	2612	4027	2617	2922	3283	3051	3423	3027	2368	2668	2444	3753	3554	2887	3210	2771	2547	3401	3432
LOC105223264	6.24	4.63	6.19	5.75	5.56	7.86	8.07	8.96	8.33	8.37	7.97	8.48	5.75	5.42	7.87	6.39	7.96	6.85	6.83	6.59	6.57	6	6.27	7.92	6.07	134	84	133	108	102	133	184	136	143	164	130	167	85	70	117	99	158	131	102	111	108	91	128	160
LOC105223265	5.39	4.15	4.61	5.86	4.86	3.49	3.6	3.62	2.87	2.57	1.21	1.18	1.76	1.61	1.13	1.53	0.67	1.66	1.12	0.62	0.95	0.8	0.71	0.52	1.36	200	130	171	190	154	102	142	95	85	87	34	40	45	36	29	41	23	55	29	18	27	21	25	18
LOC105223266	1.26	1.37	1.33	1.63	1.52	0.7	0.61	0.62	0.5	0.17	0.78	0.29	0.78	0.92	0.44	0.32	0.29	0.56	0.38	0.39	0.17	0.16	0.04	0.16	0.34	66	61	70	75	68	29	34	23	21	8	31	14	28	29	16	12	14	26	14	16	7	6	2	8
LOC105223267	1469.08	1352.76	1385.93	1270.69	1273.96	976.73	923.1	1033.66	939.15	977.7	827.72	882.89	890.95	895.89	847.83	695.07	822.9	715.76	768.57	736.48	543.73	556.82	699.07	657.54	639.74	32097	24966	30299	24226	23770	16789	21360	15942	16389	19495	13711	17628	13346	11759	12778	10935	16567	13887	11610	12576	9028	8521	14457	13426
LOC105223268	2.04	2.36	1.95	2.69	1.63	1.01	1.54	0.9	1.85	1.88	1.89	1.74	2.73	1.46	1.96	1.61	1.34	1.3	2.58	2.44	2.45	3.79	2.35	2.42	2.63	51	50	49	59	35	20	41	16	37	43	36	40	47	22	34	29	31	29	45	48	47	67	56	57
LOC105223269	85.18	79.64	81.02	76.88	83.04	115.57	125.69	109.5	100.78	109.64	89.7	93.74	87.08	95.51	95.01	104.14	95.59	101.29	101.59	100.77	109.58	106.74	123.21	108.06	120.45	8309	6702	7971	6637	7006	8889	12985	7815	7870	9739	6732	8538	5951	5688	6521	7438	8729	8991	7044	7756	8447	7560	11638	10239
LOC105223270	4.04	3.13	3.29	3.66	2.91	1.13	1.85	1.41	1.55	1.55	1.45	1.41	1.32	1.1	1.49	1.55	1.51	1.55	2.06	1.23	1.85	2.01	2.32	1.67	1.86	231	151	188	183	142	51	112	57	71	81	63	74	52	38	59	64	80	79	82	55	81	81	126	90
LOC105223271	23.39	22.92	21.21	25.4	20.38	21.6	20.95	24.08	21.09	21.69	21.36	20.4	25.52	22.37	20.21	18.57	19.97	18.38	19.01	17.47	17.96	19.66	20.29	22.75	18.89	669	554	607	635	498	487	636	487	482	566	464	535	502	385	400	383	528	468	378	392	393	397	552	612
LOC105223272	0.05	0.18	0	0	0.12	0.16	0.02	0	0.06	0.11	0.13	0.11	0.04	0	0.07	0.04	0.22	0.14	0	0.16	0.23	0.32	0.13	0.03	0.16	2	6	0	0	4	5	1	0	2	4	4	4	1	0	2	1	8	5	0	5	7	9	5	1
LOC105223273	0.17	0.07	0.08	0.13	0.09	0.19	0.12	0.09	0.14	0.09	0.02	0.18	0.04	0.08	0.07	0.2	0.15	0.14	0.16	0.29	0.21	0.12	0.12	0.29	0.18	18	6	8	12	8	16	13	7	12	9	2	18	3	5	5	15	15	13	12	24	17	9	12	29
LOC105223275	37.91	38.53	36.91	37.13	38.1	49.59	46.8	51.63	54.65	52.47	51.51	49.84	49.36	51.43	52.12	54.58	48.25	51.46	53.92	58.96	60.99	59.24	59.39	62.86	62.47	1362	1170	1327	1166	1170	1405	1785	1312	1569	1720	1406	1642	1220	1112	1296	1414	1603	1646	1347	1662	1677	1503	2030	2125
LOC105223276	14.38	15.63	12.53	13.29	12.42	23	20.23	22.22	21.86	22.17	14.41	15.31	22.36	19.03	19.08	19.24	17.54	19.53	14.06	17.05	17.47	18.46	16.52	15.9	17.13	172	158	150	139	127	217	257	188	209	242	131	168	184	137	158	166	194	208	117	160	160	156	188	179
LOC105223277	17.74	16.28	15.72	19.31	17.07	23.59	20.12	24.69	21.29	24.06	20.29	20.14	20.32	20.42	18.45	16.75	16.42	14.07	16.63	12.85	14.61	12.02	15.82	15.22	14.71	514	398.71	455.84	489	422.8	539	618.94	506	493	636	446.67	535	405	356	370	350	440	363	334.95	292	323.86	245.91	436	414.95
LOC105223278	1.77	1.31	0.92	1.69	1.27	2.31	1.22	1.44	1.62	1.4	1.5	1.49	1.27	1.42	1.42	1.18	1.21	1.11	0.97	1.21	1.14	1.24	0.92	0.82	1.08	108	67.29	56.16	90	66.2	111	79.06	62	79	78	69.33	83	53	52	60	52	68	60	41.05	58	53.14	53.09	53	47.05
LOC105223279	0	0	0.1	0	0	0.09	0.05	0	0.03	0	0.03	0.08	0	0.04	0.03	0	0	0.11	0	0	0	0	0.03	0	0	0	0	4	0	0	3	2	0	1	0	1	3	0	1	1	0	0	4	0	0	0	0	1	0
LOC105223280	0.11	0.17	0	0.2	0.11	0.15	0.06	0	0.05	0	0	0.25	0	0.06	0	0	0	0.12	0.14	0.31	0.16	0.05	0.1	0	0	3	4	0	5	3	4	2	0	1	0	0	7	0	1	0	0	0	3	3	8	4	1	3	0
LOC105223282	0	0.07	0	0.07	0	0	0	0.04	0	0.03	0	0	0	0	0.04	0.12	0	0.03	0.13	0	0.04	0	0	0.03	0	0	2	0	2	0	0	0	1	0	1	0	0	0	0	1	3	0	1	3	0	1	0	0	1
LOC105223283	14.22	15.03	14.49	12.57	13.42	9.19	10.42	7.46	7.68	9.05	8.82	9.33	8.04	10.03	8.82	11.7	11.08	12.19	10.57	13.56	11.63	12.85	16.24	13.66	13.41	290	259	296	224	234	148	227	108	127	170	138	176	114	124	125	175	211	221	151	220	183	186	318	264
LOC105223284	1.23	1.78	1.24	1.45	1.51	1.83	1.42	1.72	1.09	1.35	1.28	1.79	2.15	1.85	1.43	1.96	1.63	1.28	1.57	1.42	1.29	1.77	1.59	2.37	2.04	59	69	59	62	59	64	73	59	43	58	48	74	73	54	49	70	70	54	54	55	47	55	73	108
LOC105223285	1.29	0.88	1.29	1.09	0.99	1.9	2.14	1.68	1.45	1.64	1.03	1.04	0.64	1.69	1.33	1.27	1.03	1.34	1.42	2.21	1.33	1.39	1.07	1.37	1.29	38	22	38	28	25	44	67	35	34	44	23	28	13	30	27	27	28	35	29	51	30	29	30	38
LOC105223286	0	0	0	0	0	0.02	0	0.03	0	0	0	0	0	0	0	0	0	0	0	0	0.02	0	0.04	0	0	0	0	0	0	0	1	0	1	0	0	0	0	0	0	0	0	0	0	0	0	1	0	2	0
LOC105223287	39.44	40.6	42.17	45.45	42.8	48.05	41.71	45.57	51.29	48	46.05	42.74	47.83	44.55	50.21	50	46.52	46.86	44.75	51.69	46.03	48.1	36.62	43.87	45.49	815	709	872	821	756	783	915	666	847	905	723	810	680	554	718	745	889	862	643	838	728	702	720	853
LOC105223289	2.49	2.74	3.34	2.88	1.75	4.36	5.07	4.63	4.56	4.78	3.86	3.12	3.76	2.77	3	2.84	2.95	2.91	3.19	3.13	3.21	4.2	3.08	3.19	3.32	73	68	98	74	44	101	158	96	107	128	86	84	76	49	61	60	80	76	65	72	72	87	86	88
LOC105223290	9.91	9.69	9.75	9.75	9.91	5	7.45	5.28	4.54	6.01	8.1	9.35	5.02	7.19	7.52	10.07	10.11	10.67	10.18	11.59	11.64	12.54	13.1	13.14	13.52	385	318	379	331	329	153	307	145	141	213	239	333	134	168	202	282	363	369	275	353	346	344	484	480
LOC105223291	12.34	13.27	12.63	14.79	12.72	8.85	9.85	10.34	11.02	11.3	8.84	7.34	9.69	11.79	10.06	7.12	7.6	6.2	6.67	5.77	6.52	6.51	7.24	6.66	6.89	399	367	414	413	354	226	344	242	286	333	217	221	215	232	225	170	227	181	148	146	164	151	226	202
LOC105223292	0.63	0	0.11	0	0.12	78.63	95.48	66.27	197.96	213.83	127.01	136.96	101.51	245.98	337.13	176.23	33.41	192.43	128.28	254.62	287.57	229.09	140.8	195.69	203.87	6	0	1	0	1	586	958	443	1495	1844	912	1187	660	1399	2205	1201	292	1619	843	1888	2080	1529	1266	1740
LOC105223293	12.55	13.22	14.08	13.36	13.44	6.16	7.5	7.12	7.69	6.28	6.64	6.93	6.65	6.02	7.66	8.59	9.27	8.57	8.94	9.85	9.26	9.38	11.16	10.11	10.64	744	663	835	689	682	289	471	300	365	340	298	371	267	208	310	364	508	447	370	462	418	383	632	559
LOC105223294	82.15	42.45	42.39	57.86	49.99	68.8	108.05	73.97	72.69	78.76	29.39	33.51	46.75	28.81	34.34	60.11	59.64	57.04	63.61	82.28	115.49	125.71	97.26	100.86	110.35	2123	927	1096	1307	1104	1402	2964	1352	1501	1857	577	794	831	448	614	1120	1425	1312	1143	1668	2284	2294	2391	2452
LOC105223295	4.21	4.94	2.22	2.64	2.87	14.25	12.2	10.21	20.24	23.23	2.34	1.31	0.95	6.18	1.78	3.79	3.18	5.76	3.5	5.95	5.13	1.8	4.18	1.61	2.79	239	237	126	131	139	638	735	410	918	1203	101	68	37	211	70	155	167	291	138	265	223	72	226	86
LOC105223296	0	0	0	0	0	0	0.02	0	0	0	0	0	0	0	0	0	0	0	0	0	0	0.01	0	0	0	0	0	0	0	0	0	2	0	0	0	0	0	0	0	0	0	0	0	0	0	0	1	0	0
LOC105223297	9.34	9.69	9.73	7.68	9.49	9.26	9.53	8.4	9.08	9.06	9.65	9.83	8.72	10.59	8.87	11.07	11.21	11.55	11.9	12.26	12.13	12.14	13.15	12.5	12.49	894	781	928	651	778	700	990	571	698	785	705	842	570	595	595	761	988	978	794	915	864	807	1169	1119
LOC105223298	6.02	6.09	6.67	5.99	5.92	5.17	6.86	4.99	5.76	6.45	5.28	5.92	6.24	6.45	6.3	6.89	7.21	6.66	6.99	7.14	7.83	7.69	8.48	7.39	7.25	276	236	306	240	232	187	334	162	211	270	184	249	197	178	200	228	306	272	223	257	275	249	370	319
LOC105223300	0.37	0.09	0.3	0.09	0.09	0.28	0	0.11	0.09	0.33	0.29	0.24	0	0.5	0	0.21	0	0	0	0.19	0.39	0.11	0	0	0	5	1	4	1	1	3	0	1	1	4	3	3	0	4	0	2	0	0	0	2	4	1	0	0
LOC105223301	1166.19	1113.37	1048.77	1218.38	1051.9	975.62	872.25	913.99	1020.62	1013.16	893.13	903.24	856.46	937.8	924.61	823.27	802.55	841.53	748.17	759.04	789.02	805.32	906.67	884.89	862.93	16096	12986	14483	14699	12408	10618	12780	8922	11256	12759	9365	11432	8132	7789	8831	8193	10242	10339	7180	8219	8334	7849	11905	11490
LOC105223302	8.33	9.52	8.2	9.05	8.25	12.23	13.13	12.12	16.3	18.75	12.45	11.57	11.5	13.67	13.9	13.52	10.15	13.42	12.06	14.06	14.93	15.33	13.66	15.32	14.85	318	307	313	302	269	368	532	327	497	653	361	405	302	314	367	372	358	456	320	421	436	413	496	550
LOC105223303	4.62	4.73	4.44	4.37	3.74	4.53	5.12	4.76	4.27	5.46	3.71	4.23	3.73	3.51	3.69	3.84	3.79	3.8	4.1	3.59	3.96	3.85	3.49	4.03	4.01	269	234	266	227	190	210	321	197	197	291	164	227	150	123	150	162	206	198	168	168	177	158	193	222
LOC105223304	4.75	4.77	4.41	5.45	4.56	3.54	2.85	2.81	3.6	5.26	1.54	1.71	1.63	2.17	1.38	1.39	1.19	1.88	1.11	1.3	1.62	1.35	1.44	1.94	1.27	284	241	264	285	233	167	181	119	172	287	70	94	67	78	57	60	66	100	46	61	74	57	82	109
LOC105223305	15.12	12.12	12.37	11.41	11.98	14.75	14.86	10.84	18.48	23.44	11.87	11.16	10.51	10.64	11.02	9.06	9	8.37	8.58	9.27	10.25	8.27	9.07	10	11.3	347	235	284	229	235	267	362	176	339	491	207	235	166	147	175	150	191	171	137	167	180	134	198	216
LOC105223306	125.24	122.5	122.21	130.33	123.45	139.2	153.83	121.3	145.36	163.1	194.6	210.42	150.17	213.73	235.27	240.26	171.42	231.32	221.74	298.59	313.99	315.6	249.58	277.32	300.69	5355	4426	5228	4871	4511	4693	6982	3668	4966	6363	6321	8250	4417	5499	6961	7407	6777	8804	6592	10016	10274	9529	10152	11155
LOC105223307	69.14	38.16	43.19	54.96	36.47	73.4	88.52	72.15	78.98	74.08	33	34.21	37.81	26.63	39.73	50.78	64.97	54.12	56.41	88.29	110.34	105.86	80.56	100.7	121.34	915	420	572	633	403	766	1296	634	808	852	340	414	333	206	344	475	743	600	521	865	1090	935	891	1119
LOC105223308	0	0	0	0	0	0	0	0	0	0	0	0	0	0	0	0	0	0	0	0	0	0	0	0	0	0	0	0	0	0	0	0	0	0	0	0	0	0	0	0	0	0	0	0	0	0	0	0	0
LOC105223309	18.27	17.3	16.9	17.09	15.05	9.71	12.61	10.08	10.46	12.4	12.9	13.31	12.77	14.67	11.38	17.25	16.73	17.38	18.43	17.8	19.71	20.52	20.88	21.41	22.66	861	689	797	704	606	361	631	336	394	533	462	575	414	416	371	586	729	729	604	658	711	683	936	949
LOC105223310	42.69	40.62	40.42	39.05	45.36	11.05	15.84	13.2	13.68	14.31	17.19	16.73	18.69	15.71	17.29	20.87	21.41	21.72	22.63	24.12	25.44	23.94	25.8	25.5	25.56	2322	1860	2179	1842	2087	458	905	505	581	698	689	834	685	505	639	793	1061	1025	850	1012	1048	911	1318	1291
LOC105223311	1.2	1.22	0.99	1.2	0.87	0.3	0.52	0.3	0.2	0.5	0.48	0.36	0.4	0.26	0.34	0.58	0.3	0.44	0.24	0.6	0.56	0.7	0.67	0.76	0.58	92	79	76	80	57	18	42	16	12	35	28	25	21	12	18	32	21	30	13	36	33	38	49	55
LOC105223312	115.38	111.11	122.45	101.1	112.98	87.12	82.97	86.8	80.2	78.16	89.93	87.01	95.61	85.37	77.56	84.04	86.66	81.47	86.66	85.41	83.01	85.03	91.12	89.8	93.34	6027	4914	6411	4629	5042	3581	4599	3204	3348	3715	3563	4162	3433	2686	2808	3164	4180	3788	3143	3499	3315	3131	4520	4407
LOC105223314	2.15	2.52	2.42	2.01	1.63	4.5	4.7	3.27	7.39	5.91	8	6.26	4.52	8.39	8.43	9.52	9.15	9.35	8.09	11.61	13.43	11.88	12.06	13.82	10.41	156	155	176	128	101	258	363	168	429	392	442	417	226	367	424	499	615	605	409	662	747	610	834	945
LOC105223315	0.03	0	0.03	0	0.04	0.26	0.1	0	0.09	0.04	0.05	0.07	0.05	0.11	0	0.19	0.19	0.19	0.64	0.13	0.31	0.19	0.11	0.22	0.13	1	0	1	0	1	6	3	0	2	1	1	2	1	2	0	4	5	5	13	3	7	4	3	6
LOC105223316	12.08	12.9	13.07	12.48	11.59	7.57	7.21	8.12	7.96	7.66	10.4	9.47	8.85	10.32	9.15	11.9	10.42	10.74	10.58	12.06	10.54	13.12	9.92	13.33	11.32	494	446	535	446	405	244	313	235	260	286	323	355	249	254	259	351	394	391	301	387	330	379	386	513
LOC105223317	9.29	9.13	7.63	7.84	7.25	11.2	6.63	5.34	4.88	7.1	6.09	5.49	3.06	3.23	5.67	7.86	7.11	6.51	9.07	9.54	12.17	8.95	9.69	9.73	11.34	436	356	358	322	288	427	330	175	181	297	217	234	99	91	183	262	304	268	293	349	435	298	429	430
LOC105223318	3.88	2.96	3.42	3.99	3.23	2.54	2.57	4.18	3.33	3.82	8.09	10.07	5.54	7.92	5.32	16.92	6.29	4.69	11.87	9.6	8.25	7.91	5.6	5.42	5.99	118	76	104	106	84	61	83	90	81	106	187	281	116	145	112	371	177	127	251	229	192	170	162	155
LOC105223319	9	8.36	6.13	5.51	7.63	8.86	7.17	7.02	6.8	7.83	6.85	8.55	8.69	4.9	6.73	7.32	8.48	9.24	8.15	8.01	8.62	5.83	8.49	9.32	8.74	116	91	79	62	84	90	98	64	70	92	67	101	77	38	60	68	101	106	73	81	85	53	104	113
LOC105223320	0	0.08	0.04	0.04	0	0.09	0.03	0.05	0	0.12	0	0.04	0.1	0	0.36	0.1	0.08	0.2	0.25	0.27	0.19	0.1	0.3	0.15	0.18	0	2	1	1	0	2	1	1	0	3	0	1	2	0	7	2	2	5	5	6	4	2	8	4
LOC105223321	79.35	92.4	90.81	91.09	95.43	105.81	90.89	113.71	107.35	106.4	101.63	104.85	116.13	115.19	94.08	92.42	102.1	84.56	80.83	73.51	72.83	74	86.72	79.94	67.63	1186	1167	1358	1190	1219	1247	1442	1202	1282	1451	1154	1437	1194	1036	973	996	1411	1125	840	862	833	781	1233	1124
LOC105223322	22.25	22.82	22.23	20.93	23.33	9.72	9.34	9.02	8.39	9.32	10.01	11.85	10.66	10.1	9.39	12.83	10.01	11.91	12.14	11.72	13.38	13.31	12.59	15.44	12.99	743	644	743	611	666	256	331	213	224	284	254	363	245	203	217	309	309	354	282	307	342	314	400	485
LOC105223323	23.94	25.26	22.73	26.34	23.38	30.89	27.13	27.18	31.32	35.51	24.68	25.35	25.07	28.89	25.97	28.56	25.29	25.45	26.69	25.89	25.45	27.9	27.19	29.9	27.4	858	765	815	825	716	873	1032	689	897	1161	672	833	618	623	644	738	838	812	665	728	698	706	927	1008
LOC105223324	37.55	39.03	36.85	39.01	41.8	41.98	36.83	38.29	41.13	43.76	34.03	30.87	31.52	42.03	35.24	34.09	35.2	29.08	32.44	31.18	30.26	31.61	28.05	28.91	30.25	947	832	930	860	901	835	986	683	829	1007	652	714	547	638	615	620	821	653	569	617	584	563	673	686
LOC105223325	33.82	37.9	34.81	33.56	37.72	53.28	48.54	53.35	53.38	52.19	41.39	44.49	43.71	45.76	43.61	36.43	34.69	37.34	34.81	33.88	31.63	33.45	36.44	35.95	33.57	640	606	659	555	610	795	975	714	807	901	595	772	569	521	571	497	607	629	458	503	458	447	656	640
LOC105223326	589.62	607.29	602.69	536.72	586.69	1094.6	1051.81	1074.87	982.52	1000.23	820.84	812.43	908.15	833.03	759.98	790.74	836.18	831.09	856.01	786.02	740.89	742.05	949.24	879.89	854.22	32237	28042	32995	25655	27456	47172	61063	41550	42972	49841	34154	40774	34098	27409	28778	31139	42285	40389	32506	33761	31039	28711	49335	45273
LOC105223328	17.53	15.53	16.25	19.06	17.4	13.88	11.95	9.49	15.93	16.87	9.41	12.27	7.92	12.17	11.28	9.92	6.27	8.82	10.1	11.39	12.19	11.42	8.34	9.55	9.49	402	301	373	382	341	251	291	154	292	353	164	258	125	168	179	164	133	180	161	205	214	185	182	206
LOC105223329	1.5	0.99	0.42	0.83	0.69	4.51	4.05	4.2	4.61	4.03	5.05	5.49	6.57	7.14	4.82	4.99	6.14	6.42	7.07	5.1	5.3	5.11	5.44	5.17	4.97	35	19	9	16	13	78	99	66	81	84	88	113	102	97	76	84	130	134	112	96	93	86	118	114
LOC105223330	30.28	30.02	31.26	29.37	27.8	52.87	47.97	53	56.82	54.99	54.84	53.9	55.36	61.58	62.2	59.41	52.26	61.21	59.5	65.43	70.07	69.55	61.74	63.55	62.54	1100	920	1133	928	863	1513	1844	1358	1644	1814	1509	1788	1376	1342	1561	1552	1750	1977	1494	1859	1942	1785	2126	2164
LOC105223331	82.51	90.77	89.63	105.66	90.66	73.23	80.5	70.16	69.55	55.43	62.33	50.92	45.78	61.54	56.93	50.58	56.59	57.84	53.1	53.61	50.47	55.68	49.67	55.81	47.98	3631	3376	3947	4065	3410	2541	3761	2184	2446	2226	2084	2054	1386	1630	1734	1605	2303	2266	1625	1851	1700	1730	2079	2311
LOC105223332	1.36	1.3	1.09	1.39	1.46	1.69	2.62	1.72	1.3	1.36	1.25	1.23	0.77	1.18	0.94	1.03	2.05	1.73	2.04	1.55	1.2	2.39	0.84	1.76	1.65	46	37	37	41	42	45	94	41	35	42	32	38	18	24	22	25	64	52	48	41	31	57	27	56
LOC105223333	11.94	10.26	10.63	10.14	11.39	5.94	9.43	6.25	6.74	8.62	9.82	9.93	8.89	8.21	10.6	13.36	10.06	11.94	12.49	14.22	15.41	13.44	13.89	14.49	15.08	613	445	541	451	500	239	515	226	276	400	390	475	314	257	375	499	485	549	446	578	612	488	677	704
LOC105223334	8.89	10.62	10.2	8.98	9.18	6.26	6.15	7.31	6.31	6.17	6.55	6.23	5.6	6.67	6.5	7.6	6.58	7.31	7.55	7.33	8.75	7.97	6.86	8.14	8.02	425	429	488	375	375	236	312	247	241	269	238	273	184	192	215	262	291	311	251	275	320	269	312	366
LOC105223335	52.95	55.83	56.96	58.45	57.43	36.61	36.25	34.54	34.81	34.55	25.33	25.22	25.88	26.83	24.01	19.03	20.88	20.4	20.11	16.58	17.2	17.05	20.32	18.36	18.11	2397	2136	2580	2313	2222	1307	1742	1106	1259	1427	871	1047	806	731	752	621	874	822	633	589	596	545	875	782
LOC105223336	8.85	9.17	7.59	12.79	8.25	2.64	5.07	4.04	3.42	3.56	5.08	4.86	4.27	3.98	4.43	7.61	7.21	8.24	6.18	6.6	7.43	9.04	6.98	7.86	9.79	344	301	295	435	273.75	81	209	111	106	126	150	173	114	93	119	213	259	285	167	201	221	248	258	287
LOC105223337	14.18	13.63	14.17	12.09	14.14	8.49	9.7	8.69	8.62	10.09	8.48	8.32	6.66	6.64	9.57	11.53	10.11	10.19	10.11	11.99	13.67	14.17	13.88	13.74	15.31	805	654	805	600	686.25	380	585	349	391	523	366	433	260	227	376	472	531	515	399	534	594	568	750	734
LOC105223338	15.29	13.77	12.32	13.68	12.65	2.19	4.05	1.96	2.29	2.7	3.4	3.79	2.2	3.24	3.03	6.14	4.69	5.57	5.33	5.41	6.56	7.02	7.25	6.81	6.97	1160	883	935	907	820	131	326	105	139	187	196	264	115	148	159	336	329	376	281	322	381	376	523	486
LOC105223339	0.14	0.06	0	0.27	0	0	0.13	0.07	0	0.05	0	0.1	0	0	0	0.07	0.05	0	0.14	0.18	0	0	0.05	0.1	0.12	3	1	0	5	0	0	3	1	0	1	0	2	0	0	0	1	1	0	2	3	0	0	1	2
LOC105223340	0.42	0.5	0.31	0.39	0.52	0.23	0.59	0.19	0.23	0.26	0.28	0.2	0.38	0.17	0.19	0.62	0.59	0.26	0.53	0.53	0.34	0.52	0.66	0.36	0.5	16	16	12	13	17	7	24	5	7	9	8	7	10	4	5	17	21	9	14	16	10	14	24	13
LOC105223341	1249.45	1149.81	1181.27	1292.85	1150	1098.33	971.52	1064.61	1100.94	1066.79	1004.85	982.87	1020.04	1026.83	1086.47	937.18	971.1	1003.51	940.59	865.23	909.17	890.18	1058.01	982.74	976.22	19143	14887	18108	17314	15058	13269	15801	11536	13478	14913	11696	13809	10751	9467	11519	10353	13757	13686	10020	10400	10660	9631	15421	14165
LOC105223342	28	27.17	27.84	29.52	29.94	36.92	35.2	36.34	36.13	40.97	38.94	39.48	38.38	41.93	39.73	39.82	38.44	43.01	42.48	45.19	50.85	48.45	40.23	47.27	48.67	1370	1119	1365	1264	1251	1414	1821	1248	1408	1818	1442	1767	1283	1228	1342	1402	1733	1859	1438	1728	1893	1672	1868	2167
LOC105223343	5.15	4.92	4.77	4.66	5.29	4.38	5.86	4.65	4.73	4.98	4.5	4.88	4.11	3.82	4.4	6.1	6.21	5.99	6.75	7.12	6.56	6.62	6.11	6.22	6.48	1119	894	1048	895	984	744	1348	715	820	980	735	982	606	497	670	968	1249	1174	1013	1219	1101	1030	1255	1275
LOC105223344	7.44	6.93	7.33	8.39	7.19	7.9	6.08	6.76	5.32	7.72	4.81	4.3	4.86	5.01	4.01	3.82	3.57	4.7	2.88	2.95	3.8	3.77	3.98	3.23	3.29	338	266	333	333	279	283	293	217	193	320	166	179	152	137	126	125	150	190	91	105	132	121	172	138
LOC105223345	5.78	4.56	4.53	4.53	4.06	8.06	8.02	8.27	6.26	7.9	4.34	7.43	6.66	6.7	6.47	5.36	5.48	6.16	6.52	6.52	5.56	5.61	7.64	7.69	7.78	275	184	214	188	164	304	404	279	239	344	156	322	217	192	213	184	240	260	215	242	201	189	348	345
LOC105223346	0	0	0	0	0	0	0	0	0	0	0	0.16	0	0	0.04	0.04	0	0.03	0.04	0	0.24	0	0	0	0	0	0	0	0	0	0	0	0	0	0	0	5	0	0	1	1	0	1	1	0	6	0	0	0
LOC105223347	0	0	0	0	0	0	0	0	0	0	0	0	0	0	0	0	0	0	0	0	0	0	0	0	0	0	0	0	0	0	0	0	0	0	0	0	0	0	0	0	0	0	0	0	0	0	0	0	0
LOC105223348	51.31	47.55	47.02	52.61	47.5	68.19	81.52	65.98	89.64	105.66	82.41	88.16	74.69	101.15	105.23	111.83	83.66	121.46	105.96	147.91	155.24	147.55	121.76	133.58	137.44	1503	1177	1378	1347	1189	1575	2535	1367	2098	2824	1834	2368	1505	1783	2133	2362	2266	3167	2158	3399	3480	3052	3393	3681
LOC105223349	0	0	0	0	0	0	0	0	0	0	0	0.11	0	0	0	0	0	0	0	0	0	0	0	0	0	0	0	0	0	0	0	0	0	0	0	0	2	0	0	0	0	0	0	0	0	0	0	0	0
LOC105223350	0	0	0	0	0	0	0.09	0	0.06	0	0.06	0.05	0.14	0	0	0	0	0	0	0	0	0	0	0	0	0	0	0	0	0	0	2	0	1	0	1	1	2	0	0	0	0	0	0	0	0	0	0	0
LOC105223351	0.2	0.28	0.24	0.32	0.28	0.05	0	0	0.15	0.09	0.05	0.09	0	0.2	0.17	0	0.13	0	0.06	0	0.16	0.06	0.13	0.13	0	5	6	6	7	6	1	0	0	3	2	1	2	0	3	3	0	3	0	1	0	3	1	3	3
LOC105223352	0.73	0.51	0.45	0.64	0.49	0.79	0.94	0.98	0.82	0.76	0.99	1.07	0.92	0.94	0.92	1.45	1.5	1.32	1.4	1.53	1.32	1.17	1.33	1.54	1.4	206	122	128	159	119	177	283	197	186	196	214	278	180	161	180	297	393	334	277	341	286	234	359	412
LOC105223353	0	0	0	0.03	0	0.11	0	0	0.04	0	0.08	0	0.04	0	0	0	0	0	0	0	0.04	0	0.06	0.06	0.04	0	0	0	1	0	3	0	0	1	0	2	0	1	0	0	0	0	0	0	0	1	0	2	2
LOC105223354	0	0	0	0	0	0	0	0	0	0	0	0	0	0	0	0	0	0	0	0	0	0	0	0	0	0	0	0	0	0	0	0	0	0	0	0	0	0	0	0	0	0	0	0	0	0	0	0	0
LOC105223355	0	0.04	0.07	0	0	0.71	0.1	0.05	0.4	0.35	0	0	0	0	0	0	0.04	0.08	0	0	0.05	0	0	0	0	0	1	2	0	0	16	3	1	9	9	0	0	0	0	0	0	1	2	0	0	1	0	0	0
LOC105223356	0	0	0	0	0	0	0	0	0	0	0	0	0	0	0	0	0	0	0	0	0	0	0	0	0	0	0	0	0	0	0	0	0	0	0	0	0	0	0	0	0	0	0	0	0	0	0	0	0
LOC105223357	0.08	0	0	0.29	0.1	79.04	103.37	65.38	222.11	236.51	200.16	137.93	130.32	231.51	376.75	203.61	33.88	159.87	130.86	249.47	370.72	260.64	199.08	217.96	274.92	1	0	0	3	1	748	1317	555	2130	2590	1825	1518	1076	1672	3129	1762	376	1708	1092	2349	3405	2209	2273	2461
LOC105223358	0.49	0.5	0.14	0.32	0.08	111.71	166.68	100.86	339.88	322.97	226.47	215.86	109.78	282.43	423.02	297.47	50.58	272.95	155.69	338.7	582.8	407.82	371.02	442.4	419.45	7	6	2	4	1	1262	2535	1022	3891	4222	2465	2836	1082	2435	4194	3073	670	3481	1551	3807	6390	4126	5057	5963
LOC105223359	2.94	3.05	2.05	2.8	3.02	0.87	1.69	1.34	0.94	1.54	1.37	1.71	1.28	1.36	1.98	1.99	1.69	1.72	1.88	2.2	1.71	2.22	1.54	1.91	2.19	90	79	63	75	79	21	55	29	23	43	32	48	27	25	42	44	48	47	40	53	40	48	45	55
LOC105223360	0.04	0	0	0.04	0	0	0	0	0	0	0	0	0	0	0	0	0	0	0	0	0	0	0	0	0.09	1	0	0	1	0	0	0	0	0	0	0	0	0	0	0	0	0	0	0	0	0	0	0	0
LOC105223361	0	0	0	0	0	0	0	0	0	0	0	0	0	0	0	0	0	0	0	0	0	0	0	0	0	0	0	0	0	0	0	0	0	0	0	0	0	0	0	0	0	0	0	0	0	0	0	0	0
LOC105223362	0	0	0	0	0	0	0	0	0	0	0	0	0	0	0	0	0	0.05	0	0	0	0	0	0	0	0	0	0	0	0	0	0	0	0	0	0	0	0	0	0	0	0	1	0	0	0	0	0	0
LOC105223363	0	0.06	0	0.22	0	0	0.13	0	0	0	0	0	0	0.04	0	0	0	0.03	0	0	0.04	0	0	0	0.03	0	2	0	7	0	0	5	0	0	0	0	0	0	1	0	0	0	1	0	0	1	0	0	0
LOC105223364	1.26	0.75	1.55	0.72	1.34	4.14	4.05	2.43	4.66	2.7	2.64	3.06	3.66	2.95	4.14	2.86	5.95	3.15	3.54	3.14	2.84	2.11	3.13	3.17	2.46	22	11	27	11	20	57	75	30	65	43	35	49	44	31	50	36	96	49	43	43	38	26	52	52
LOC105223365	0.21	0.15	0.13	0.33	0.24	0.23	0.22	0.37	0.49	0.06	0.86	0.43	0.19	0.13	0.53	0.47	0.59	0.64	0.64	0.53	0.81	0.92	1.01	1.24	1.15	8	5	5	11	8	7	9	10	15	2	25	15	5	3	14	13	21	22	17	16	24	25	37	45
LOC105223366	0	0	0	0	0	0	0	0	0	0.12	0.07	0	0	0.05	0	0	0.03	0	0	0.04	0.04	0.16	0.03	0.09	0.04	0	0	0	0	0	0	0	0	0	4	2	0	0	1	0	0	1	0	0	1	1	4	1	3
LOC105223367	0.15	0.58	0.45	0.17	0.61	0.47	0.39	0.69	0.42	0.33	0.64	0.24	0.76	0.37	0.54	0.83	0.73	0.55	0.59	1.05	0.44	0.58	0.86	0.64	0.76	4	13	12	4	14	10	11	13	9	8	13	6	14	6	10	16	18	13	11	22	9	11	22	16
LOC105223368	0	0	0	0	0	0	0	0	0	0	0	0.05	0	0	0.06	0	0	0	0	0	0.05	0	0	0.04	0.05	0	0	0	0	0	0	0	0	0	0	0	1	0	0	1	0	0	0	0	0	1	0	0	1
LOC105223369	1011.74	977.5	1052.63	933.52	1022.79	815.89	920.56	786.91	747.56	754.95	807.36	903.9	791.7	757.73	842.55	840.08	860.59	843.94	845.92	817.9	946.86	860.33	1054.56	951.98	1010.89	24627	20107	25636	19862	21277	15660	23787	13547	14540	16767	14930	20176	13257	11099	14192	14744	19369	18286	14317	15619	17638	14788	24420	21800
LOC105223370	0.14	0	0.17	0.23	0.03	0.22	0.4	0.12	0.21	0.22	0.23	0.28	0.08	0.05	0.04	0.12	0.37	0.13	0.16	0.15	0.34	0.28	0.18	0.24	0.14	5	0	6	7	1	6	15	3	6	7	6	9	2	1	1	3	12	4	4	4	9	7	6	8
LOC105223371	0	0	0	0	0	0	0	0	0	0	0	0	0	0	0	0	0	0	0	0	0	0	0	0	0	0	0	0	0	0	0	0	0	0	0	0	0	0	0	0	0	0	0	0	0	0	0	0	0
LOC105223372	0.55	0.65	0.43	0.63	0.93	0.62	0.8	0.69	0.08	0.53	0.64	0.27	0.8	0.2	0.53	0.93	0.72	0.82	0.7	0.78	0.56	1.12	1.02	0.78	0.77	9	9	7	9	13	8	14	8	1	8	8	4	9	2	6	11	11	12	8	10	7	13	16	12
LOC105223373	4.23	3.67	1.23	4.4	2.38	3.89	3.96	3.06	5.06	4.04	9.19	4.76	1.22	4.73	3.69	7.84	4.86	7.7	7.53	11.16	11.95	7.09	7.78	6.6	14.56	131	96	38	119	63	95	130	67	125	114	216	135	26	88	79	175	139	212	162	271	283	155	229	192
LOC105223374	5.01	4.67	3.96	4.43	3.82	3.65	3.56	4.03	3.17	3.96	4.99	4.81	4.49	1.72	5.97	5.14	5.13	4.62	3.59	5.28	6.39	5.72	5.45	7.12	3.3	136.91	107.74	108.24	105.69	89.2	78.6	103.37	77.85	69.12	98.66	103.6	120.43	84.45	28.22	112.84	101.17	129.61	112.44	68.27	113.14	133.66	110.28	141.69	183.01
LOC105223375	1.09	1.25	1.01	1.4	0.98	0.66	0.66	0.69	0.78	0.77	0.91	0.53	0.83	0.5	0.83	0.68	0.91	1.17	1.01	0.88	1.1	1.74	1.66	1.43	1.51	65	63	60	73	50	31	42	29	37	42	41	29	34	18	34	29	50	62	42	41	50	73	94	80
LOC105223376	11.9	12.42	11.66	9.82	11.35	7.57	10.64	6.33	8.52	11.25	10.87	11.6	8.68	8.37	9.44	15.27	15.94	14.83	13.35	14.63	15.67	15.39	18.54	16.81	18.65	255	225	250	184	208	128	242	96	146	220	177	228	128	108	140	236	316	283	199	246	257	233	378	339
LOC105223377	7.1	7.34	6.44	6.47	6.78	2.3	3.8	2.15	3.05	3.16	3.86	4.09	3.47	3.7	3.7	5.09	5.6	5.13	5.07	5.59	5.76	5.92	5.99	6.49	5.71	443	387	402	353	362	113	252	95	152	180	183	234	149	139	160	229	323	285	220	274	275	261	356	381
LOC105223378	0.02	0	0.01	0	0.02	0.05	0.04	0.01	0.02	0.04	0.07	0.03	0.03	0	0.03	0.01	0	0.01	0.03	0.02	0.04	0.04	0.01	0.01	0.11	2	0	1	0	2	4	4	1	2	4	6	3	2	0	2	1	0	1	2	2	3	3	1	1
LOC105223379	0.47	0.55	0	0.8	0.11	2.84	1.32	2.5	2.16	2.04	0.43	0.41	0.27	0.54	0.47	0.13	0.25	0.16	0.47	0.53	0.18	0.33	0.29	0.15	0.18	10	10	0	15	2	48	30	38	37	40	7	8	4	7	7	2	5	3	7	9	3	5	6	3
LOC105223381	5.11	5.79	4.25	6.95	5.15	1.65	1.85	2.26	1.79	1.94	3.15	2.35	2.75	2.18	3.22	2.99	2.76	2.34	2.91	2.88	2.66	2.49	2.78	2.48	2.69	346	331	288	411	298	88	133	108	97	120	162	146	128	89	151	146	173	141	137	153	138	119	179	158
LOC105223382	2.1	1.68	1.73	1.85	1.89	1.43	1.75	1.41	1.59	1.9	1.52	2	1.54	1.9	1.83	1.33	1.82	2.19	2.3	1.88	1.82	2.58	2.12	1.96	2.03	158	106	130	120	119	84	140	74	96	129	83	138	80	85	95	71	129	148	122	114	103	141	148	137
LOC105223383	101.87	101.68	104.49	106.3	106.04	66.33	66.79	67.37	67.03	71.83	68.64	73.1	73.7	74.43	74.1	72.86	75.94	75.58	79.07	78.45	80.05	82.47	88.58	86.31	87.27	3878	3271	3980	3537	3450	1991	2699	1814	2039	2495	1985	2552	1930	1705	1952	2000	2673	2561	2093	2343	2332	2217	3208	3091
LOC105223384	9.01	6.47	9.24	7.73	7.81	15.4	12.12	12.74	14.19	13.31	12.49	14.65	10.87	10.69	13.37	12.38	11.66	14.1	13.65	13.43	15.13	12.07	14.37	15.99	12.72	112	68	115	84	83	151	160	112	141	151	118	167	93	80	115	111	134	156	118	131	144	106	170	187
LOC105223385	0.05	0.03	0	0	0	0	0	0	0	0	0	0	0	0	0	0.03	0	0	0	0.03	0	0.03	0	0	0.03	2	1	0	0	0	0	0	0	0	0	0	0	0	0	0	1	0	0	0	1	0	1	0	0
LOC105223386	0.4	1.54	0.18	3.64	0.21	0.28	0	0	0.11	0	0	0	0	0	0	0	0	0	0	0	0	0	0	0.1	0	9	29	4	71	4	5	0	0	2	0	0	0	0	0	0	0	0	0	0	0	0	0	0	2
LOC105223387	0.04	0	0	0	0.04	0.05	0	0	0	0	0	0	0	0	0	0	0	0	0	0	0	0	0	0.04	0	1	0	0	0	1	1	0	0	0	0	0	0	0	0	0	0	0	0	0	0	0	0	0	1
LOC105223388	0	0	0	0	0	0.1	0	0	0.05	0	0.1	0	0	0.06	0	0	0	0	0	0	0.1	0	0	0	0	0	0	0	0	0	2	0	0	1	0	2	0	0	1	0	0	0	0	0	0	2	0	0	0
LOC105223389	6.87	5.74	6.04	7.53	7.29	5.5	5.65	5.23	4.23	5.25	9.96	10.21	7.82	8	8.53	9.21	9.61	10.64	10.94	9.07	12.3	13.25	13.84	12.46	12.06	364	257	320	349	330	230	318	196	179	254	401	496	285	255	313	352	471	502	403	377	499	496	698	621
LOC105223391	6.18	5.4	5.14	6.11	4.83	8.78	7.37	8.92	8.74	8.9	7.58	8.38	10.18	9.17	9.58	7.31	7.77	8.74	8.4	7.73	7.46	7.21	7.17	8.17	8.43	382	282	318	330	255	428	484	390	432	502	356	475	433	341	410	326	444	481	361	375	353	315	422	475
LOC105223392	3.38	3.97	4.05	3.45	3.81	1.94	3.09	2.63	1.7	3.71	4.02	3.22	4.44	3.14	3.45	4.23	4.16	3.95	3.72	4.53	4.25	6.25	5.79	5.54	4.79	102	101	122	91	98	46	99	56	41	102	92	89	92	57	72	92	116	106	78	107	98	133	166	157
LOC105223393	7.78	6.97	6.48	9.26	6.89	8.34	7.67	8.33	8.87	8.17	9.57	8.38	10.5	9.94	8.18	9.12	8.96	9.41	8.27	9.09	8.66	9.64	8.22	9.78	12.17	169	128	141	176	128	143	177	128	154	162	158	167	157	130	123	143	180	182	125	155	144	148	170	200
LOC105223394	3.03	4.15	3.33	4.1	3.01	3.58	4.17	4.35	4.27	4.38	3.65	2.53	2.7	4.1	2.5	3.35	3.16	2.97	3.62	3.37	3.49	3.03	3.29	2.98	3.35	119	138	131	141	101	111	174	121	134	157	109	91	73	97	68	95	115	104	99	104	105	84	123	110
LOC105223395	63.79	64.93	61.78	65.96	58.51	293.22	349.02	350.95	298.54	296.95	255	262	261.51	266.9	231.51	211.96	261	219.57	233.89	215.43	172.4	199.77	241.42	189.14	186.49	1755	1490	1695	1583	1382	6328	10161	6828	6544	7406	5290	6568	4932	4396	4384	4180	6607	5347	4468	4630	3598	3858	6233	4840
LOC105223396	7.84	7.61	9.26	7	10.93	8.48	8.28	6.82	6.53	5.99	6.89	7.21	6.62	6.67	5.38	7.36	8.54	8.36	6.98	5.63	8.09	7.22	6.13	6.01	6.1	267	220	317	209	318	229	300	164	178	186	179	226	155	139	127	182	270	256	165	151	211	175	200	194
LOC105223397	0	0	0	0	0	0	0	0	0	0	0	0.03	0	0.05	0	0.02	0	0	0.05	0.02	0.02	0	0	0.03	0.02	0	0	0	0	0	0	0	0	0	0	0	2	0	2	0	1	0	0	2	1	1	0	0	2
LOC105223398	0	0	0	0	0	0.05	0	0	0	0	0	0	0	0	0	0	0	0	0	0	0	0	0	0	0	0	0	0	0	0	1	0	0	0	0	0	0	0	0	0	0	0	0	0	0	0	0	0	0
LOC105223399	0	0.18	0.05	0.49	0.18	0.03	0	0	0	0	0	0.03	0	0.12	0.29	0.28	0	0	0	0.03	0.07	0.07	0.03	0.03	0.03	0	6	2	17	6	1	0	0	0	0	0	1	0	3	8	8	0	0	0	1	2	2	1	1
LOC105223400	0	0	0	0	0	0	0	0.1	0.09	0.23	0	0	0	0	0	0.1	0.08	0	0	0	0.09	0	0	0	0	0	0	0	0	0	0	0	1	1	3	0	0	0	0	0	1	1	0	0	0	1	0	0	0
LOC105223401	0.79	0.8	0.69	0.6	0.63	0.56	0.53	0.33	0.39	0.33	0.51	0.48	0.31	0.23	0.46	0.65	0.69	0.67	0.71	0.66	0.73	0.64	0.71	0.52	0.37	74	63	64	49	50	41	53	22	29	28	36	41	20	13	30	44	60	56	46	48	52	42	63	46
LOC105223402	0.29	0.38	0.56	0.34	0.31	0.19	0.22	0.17	0.22	0.19	0.19	0.16	0.17	0.24	0.34	0.24	0.25	0.33	0.08	0.3	0.46	0.21	0.18	0.12	0.48	10	11	19	10	9	5	8	4	6	6	5	5	4	5	8	6	8	10	2	8	12	5	6	4
LOC105223403	7.26	6.85	6.83	6.52	7	5.57	8.01	5.27	5.32	6.27	6.25	8.8	5.94	4.46	6.65	10.73	10.99	10.02	12.77	13.74	15.47	16.17	16.07	17.51	17.92	306	244	288	240	252	185	358	157	179	241	200	340	172	113	194	326	428	376	374	454	499	481	644	694
LOC105223404	8	8.63	7.83	7.55	8.25	8.06	8.26	8.28	8.65	8.9	11.43	10.05	10.33	12.75	14.2	13.59	13.71	14	13.05	14.88	16.14	14.97	13.7	15.65	13.88	223	202	217	183	195	174	244	161	189	225	240	253	195	214	273	270	349	343	251	324	340	293	359	404
LOC105223405	9.43	11.51	9.83	9.91	10.45	7.41	8.11	6.65	6.55	7.86	11.09	9.88	9.31	9.67	11.75	13.3	10.63	13.19	11.23	12.97	13.05	12.87	11.9	11.35	12.07	355	366	370	326	336	220	324	177	197	270	317	341	241	219	306	361	370	442	294	383	376	342	426	402
LOC105223406	0	0	0	0	0	0	0	0	0	0	0	0	0	0	0	0	0	0	0	0	0	0	0	0	0	0	0	0	0	0	0	0	0	0	0	0	0	0	0	0	0	0	0	0	0	0	0	0	0
LOC105223407	14.11	12.99	13.41	12.76	14.92	11.74	12.54	13.16	13.29	13.53	10.92	12.36	11.55	11.44	11.7	9.97	10.18	9.21	12.95	11.55	10.25	11.4	14.21	12.69	9.92	279	217	265	221	252	183	263	184	210	244	164	224	157	136	160	142	186	162	178	179	155	159	267	236
LOC105223408	805.34	751.59	761.13	770.59	720.59	902.95	724.85	846.07	892.49	771.55	748.9	742.41	671.37	721.96	754.55	618.91	650.31	587.67	607.71	537.25	483.73	461.95	592.68	553.14	511.17	9137	7206	8640	7642	6987	8078	8730	6789	8091	7987	6455	7724	5240	4929	5924	5063	6822	5935	4794	4782	4200	3701	6397	5904
LOC105223409	18.18	15.97	17.36	14.98	18.3	11.19	9.44	9.35	9.37	10.47	10.64	10.35	8.74	10.55	10.43	8.71	8.6	10.36	10.57	9.88	10.91	9.46	11.31	11.01	9.72	272	202	260	196	234	132	150	99	112	143	121	142	90	95	108	94	119	138	110	116	125	100	161	155
LOC105223410	10.38	10.94	10.39	10.87	11.78	9.47	11.95	11.5	10.29	11.17	13.16	12.9	14.24	13.97	11.51	12.85	15.52	13.33	13.62	14.65	14.16	14.74	17.44	16.71	14.69	606	540	607	555	588	436	741	475	480	595	584	691	572	491	465	541	838	693	553	671	633	608	969	918
LOC105223411	43.32	45.21	45.94	44.67	46.09	56.09	53.33	74.35	62.45	67.75	43.77	51.74	49.01	53.19	47.04	49.13	44.84	47.32	48.91	54.61	54.54	50.92	51.76	55.23	54.06	3345	2965	3561	3027	3028	3381	4318	4002	3804	4735	2554	3622	2600	2465	2456	2739	3198	3203	2616	3266	3201	2766	3751	3956
LOC105223412	0	0	0	0	0	0.02	0	0	0	0	0.2	0.02	0.08	0	0.14	0.03	0	0	0.03	0	0	0.03	0	0.02	0	0	0	0	0	0	1	0	0	0	0	8	1	3	0	5	1	0	0	1	0	0	1	0	1
LOC105223413	1.98	2.47	2.13	2.22	2.07	2.54	2.18	2.26	1.51	2.1	2.5	1.82	2.41	1.89	1.75	1.65	1.52	1.51	1.85	1.63	1.25	1.61	1.58	1.28	1.51	225	237	242	220	201	227	262	181	137	217	215	189	188	129	137	135	159	152	146	145	109	129	171	137
LOC105223414	0	0	0	0	0	0	0	0	0	0	0	0	0	0	0	0	0	0	0	0	0	0	0	0	0	0	0	0	0	0	0	0	0	0	0	0	0	0	0	0	0	0	0	0	0	0	0	0	0
LOC105223415	0	0	0	0	0	0	0	0	0	0	0	0	0	0	0	0	0	0	0	0	0	0	0	0	0	0	0	0	0	0	0	0	0	0	0	0	0	0	0	0	0	0	0	0	0	0	0	0	0
LOC105223416	2.33	2.27	2.17	2.09	2.41	2.68	3.25	3.11	3.25	3.03	3.45	3.62	3.46	3.48	3.1	4.18	3.88	4.47	3.61	4.39	4.07	4.66	4.23	4.1	4.17	181	149	169	142	160	164	268	171	202	215	204	258	185	163	167	234	279	309	195	268	242	256	313	300
LOC105223417	0.03	0	0	0	0	0	0	0	0	0	0.04	0	0	0	0	0	0	0	0.09	0	0	0.13	0	0	0	1	0	0	0	0	0	0	0	0	0	1	0	0	0	0	0	0	0	2	0	0	3	0	0
LOC105223418	3.62	3.35	3.36	3.68	3.63	2.84	3.74	3.14	3.06	3.18	3.31	2.85	3.63	3.91	2.87	4.16	3.4	4.65	3.54	3.8	4.11	3.7	3.67	4.28	4.21	197	154	183	175	169	122	216	121	133	158	137	142	136	128	108	163	171	225	134	162	171	142	190	219
LOC105223419	0	0	0	0.1	0	0	0	0	0	0	0	0	0.06	0	0	0	0	0	0	0	0	0	0	0	0	0	0	0	2	0	0	0	0	0	0	0	0	1	0	0	0	0	0	0	0	0	0	0	0
LOC105223420	14.73	16.91	15.79	15.46	15.68	9.21	9.21	10.51	7.35	7.83	7.24	9.37	8.08	8.17	10.49	4.86	5.35	7.67	6.57	5.64	6.05	6.15	8.49	7.26	6.66	509	494	546	467	463	251	338	257	203	247	190	297	192	170	251	121	171	236	158	153	160	150	279	236
LOC105223421	54.47	48.16	49.85	55.39	51.95	82.11	85.92	84.24	110.88	113.39	92.19	86.18	82.62	99	101.3	88.11	71.68	85.13	77.33	84.48	88.27	82.74	88.91	90.65	88.12	854	638	782	759	696	1015	1430	934	1389	1622	1098	1239	891	934	1099	996	1039	1188	843	1039	1059	916	1326	1337
LOC105223422	0.02	0.08	0	0.05	0	0.03	0.07	0	0.03	0.03	0.09	0.05	0.03	0.23	0.03	0	0	0.05	0.03	0.09	0.03	0.07	0.07	0.12	0.06	1	3	0	2	0	1	3	0	1	1	3	2	1	6	1	0	0	2	1	3	1	2	3	5
LOC105223423	5.03	5.52	4.03	4.77	4.54	4.12	6.5	5.31	5.24	4.96	5.81	5.73	4.12	4.89	5.18	7.91	7.64	6.91	6.95	9.22	9.36	9.94	8.61	9.37	10.46	328	304	263	272	253	212	450	245	273	295	288	343	185	192	234	372	461	401	315	472	467	458	534	575
LOC105223425	1.92	1.83	1.77	2.54	2.31	1.26	1.44	0.91	1.2	1.91	1.57	1.47	1.52	1.32	1.44	1.36	1.78	1.79	1.43	1.99	1.67	2.02	1.45	1.34	1.28	116	93	107	134	119	60	92	39	58	105	72	81	63	48	60	59	99	96	60	94	77	86	83	76
LOC105223426	3.86	3.16	3.28	3.42	3.12	3.14	3.94	2.74	2.85	2.87	3.55	3.72	2.7	3.68	3.02	4.2	4.58	3.72	4.53	4.78	3.18	3.58	4.03	4.2	3.92	660	457	561	512	456	423	715	331	389	448	461	584	318	379	357	518	725	567	539	642	417	433	656	676
LOC105223427	0	0	0	0	0	0	0	0	0	0	0	0	0	0	0	0	0	0	0	0	0	0	0	0	0	0	0	0	0	0	0	0	0	0	0	0	0	0	0	0	0	0	0	0	0	0	0	0	0
LOC105223428	0	0	0	0	0	0	0	0.13	0	0	0	0.1	0	0	0	0	0.1	0	0	0	0	0	0	0	0	0	0	0	0	0	0	0	1	0	0	0	1	0	0	0	0	1	0	0	0	0	0	0	0
LOC105223429	0	0	0	0	0	0.12	0	0	0	0	0	0	0	0	0	0	0	0	0	0	0	0	0	0	0	0	0	0	0	0	1	0	0	0	0	0	0	0	0	0	0	0	0	0	0	0	0	0	0
LOC105223430	0	0	0	0.11	0.06	0	0	0	0	0	0	0	0	0	0	0	0	0	0	0	0	0	0	0	0	0	0	0	2	1	0	0	0	0	0	0	0	0	0	0	0	0	0	0	0	0	0	0	0
LOC105223431	0	0	0	0	0	0	0	0	0	0	0	0	0	0	0	0	0	0	0.36	0	0	0	0	0	0	0	0	0	0	0	0	0	0	0	0	0	0	0	0	0	0	0	0	2	0	0	0	0	0
LOC105223432	0	0	0	0	0	0	0	0	0	0	0	0	0	0	0	0	0	0	0	0	0	0	0	0	0	0	0	0	0	0	0	0	0	0	0	0	0	0	0	0	0	0	0	0	0	0	0	0	0
LOC105223433	0	0	0	0	0	0	0	0	0	0	0	0	0	0	0	0	0	0	0	0	0	0	0	0	0	0	0	0	0	0	0	0	0	0	0	0	0	0	0	0	0	0	0	0	0	0	0	0	0
LOC105223434	0	0	0	0	0	0	0.01	0	0	0	0.03	0.04	0.02	0	0.02	0	0.01	0	0.05	0.01	0.01	0	0.02	0.05	0.04	0	0	0	0	0	0	1	0	0	0	2	3	1	0	1	0	1	0	3	1	1	0	2	4
LOC105223435	0.68	0.1	0.25	0.97	0.4	0.11	0.08	0.36	0.42	0.19	0.11	0.55	0.25	0	0.37	0.23	0.09	0.67	0.12	0.22	0.77	0.12	0.62	0.72	0.32	8	1	3	10	4	1	1	3	4	2	1	6	2	0	3	2	1	7	1	2	7	1	7	8
LOC105223436	0.03	0.03	0	0	0.21	0.22	0.28	0.25	0.26	0.19	0.35	0.22	0.25	0.34	0.3	0.04	0.16	0.23	0.21	0.07	0.11	0.33	0.22	0.12	0.07	1	1	0	0	6	6	10	6	7	6	9	7	6	7	7	1	5	7	5	2	3	8	7	4
LOC105223437	0	0	0	0	0	0	0	0	0	0	0	0	0	0	0	0	0	0	0	0	0	0	0	0	0	0	0	0	0	0	0	0	0	0	0	0	0	0	0	0	0	0	0	0	0	0	0	0	0
LOC105223438	0	0	0	0	0	0	0	0	0	0.05	0	0	0	0	0	0	0	0	0	0	0	0	0	0.05	0	0	0	0	0	0	0	0	0	0	1	0	0	0	0	0	0	0	0	0	0	0	0	0	1
LOC105223439	6.51	6.48	9.71	5.79	7.74	4.32	2.53	3.36	2.46	2.49	2.45	3.72	4.06	4.47	4.78	3.58	2.46	3.72	4.16	2.11	1.22	3.8	3.8	2.86	3.79	63	53	94	49	64	33	26	23	19	22	18	33	27	26	32	25	22	32	28	16	9	26	35	26
LOC105223440	0	0	0	0	0	0	0	0	0	0	0	0	0.18	0	0	0	0	0	0	0	0	0	0	0	0	0	0	0	0	0	0	0	0	0	0	0	0	1	0	0	0	0	0	0	0	0	0	0	0
LOC105223441	9.76	7.91	10.98	10.48	9.44	6.67	6.13	6.07	5.93	5.5	5.76	7.1	7.53	5.8	6.05	5.85	6.7	6.75	6.89	5.9	5.41	5.75	6.4	7.03	7.57	375	257	422	352	310	202	250	165	182	193	168	250	199	134	161	162	238	231	184	178	159	156	234	254
LOC105223442	2.55	2.66	1.11	2.39	1.65	1.51	1.12	0.69	2.31	1.07	1.28	0.83	0.67	0.9	0.94	0.94	0.53	0.85	1.48	1.66	1.74	0.88	0.8	0.81	1.3	94	83	41	77	52	44	44	18	68	36	36	28	17	20	24	25	18	28	38	48	49	23	28	28
LOC105223443	0	0	0	0	0.06	0	0	0	0	0	0	0	0	0	0	0	0	0.03	0	0.12	0	0	0.02	0	0.06	0	0	0	0	2	0	0	0	0	0	0	0	0	0	0	0	0	1	0	4	0	0	1	0
LOC105223444	0	0	0.07	0	0	0	0.02	0	0	0	0	0.05	0.1	0.04	0.07	0	0.1	0.03	0.07	0.09	0.03	0.03	0.25	0.08	0.03	0	0	3	0	0	0	1	0	0	0	0	2	3	1	2	0	4	1	2	3	1	1	10	3
LOC105223445	117.56	115.85	106.42	113.26	117.01	46.42	55.39	44.17	51.39	53.27	72.91	68.6	57.01	65.19	69.84	91.8	85.04	85.5	85.75	94.74	94.87	90.45	90.63	98.1	92.36	8629	7178	7830	7272	7325	2682	4323	2292	3027	3562	4081	4607	2884	2874	3554	4855	5775	5604	4371	5457	5323	4698	6318	6782
LOC105223446	4.29	4.79	2.86	3.77	2.18	3.31	4.28	3.08	4.21	2.18	4.01	4.68	2.71	3.41	5.13	7.59	7.4	7.55	5.37	10.79	10.65	10.93	10.73	9.33	11.73	69	65	46	53	30	42	73	35	54	32	49	69	30	33	57	88	110	108	60	136	131	124	164	141
LOC105223447	120.85	97.66	100.59	107.88	95.21	68.07	49.36	64.63	74.82	60.21	58.64	54.63	48.32	57.73	66.22	38.9	47.56	43.44	41.17	49.29	43.89	45.77	30.33	37.17	34.32	1047	715	872	817	705	465	454	396	518	476	386	434	288	301	397	243	381	335	248	335	291	280	250	303
LOC105223448	45.27	50.77	49.28	54.85	54.79	19.87	22.33	19.73	22.29	20.85	24.35	22.06	21.75	20.52	22.7	22.76	22.92	23.06	22.03	24.82	25.29	23.24	23.93	26.36	23.33	2320	2199	2527	2457	2400	803	1215	715	913	975	948	1037	767	633	805	841	1086	1052	785	998	992	841	1167	1271
LOC105223449	12.38	11.21	12.79	11.06	11.21	4.5	6.19	4.23	5.65	5.1	7.47	6.79	5.15	4.88	5.82	8.35	8.58	8.41	10.12	10.82	11.46	10.68	10.89	11.65	14.07	716	548	740	559	554	205	380	173	261	269	328	360	205	170	233	348	459	433	407	491	507	436	599	634
LOC105223450	15.06	14.73	16.82	14.44	14.65	8.32	8.66	9.51	9.62	8.9	10.09	9.11	7.52	9.75	9.93	10.59	9.71	11.43	11.36	11.35	13.33	11.5	11.7	13.26	12.45	629	520	703	527	523	274	384	281	321	339	320	349	216	245	287	319	375	425	330	372	426	339	465	521
LOC105223451	21.98	22.98	22.78	22.4	22.86	16.88	19.53	18.24	16.77	18.41	21.48	23.87	24.55	22.49	22.27	25.33	25.09	25	26.4	27.67	27.57	29.2	26.1	28.92	27.32	971	858	1007	865	863	588	916	570	592	742	721	967	746	598	681	807	1025	983	811	959	932	911	1097	1202
LOC105223452	3.54	3.64	3.77	4.02	4.03	3.28	3.13	2.4	2.94	2.89	2.62	3.07	2.21	2.61	2.81	3.82	3.24	2.76	3.07	3.28	3.28	3.28	3.84	3.97	4.2	219	190	233	217	213	160	205	105	145	163	123	174	94	97	120	170	185	152	132	159	155	143	226	231
LOC105223453	63.58	67.03	63.32	59.42	62.53	132.44	109.5	123.56	120.63	123.14	100.44	93.41	95.88	104.75	92.4	86.84	92.6	80.49	81.25	72.9	74.6	75.6	98.41	86.66	84.09	1906	1698	1910	1568	1599	3133	3493	2624	2890	3376	2302	2584	1984	1899	1922	1879	2576	2160	1703	1724	1720	1608	2808	2460
LOC105223454	0.02	0.13	0	0.02	0.12	1.11	0.85	0.06	1.82	1.4	4.13	2.98	1.86	3.3	1.73	2.93	0.18	1.63	1.87	5.91	5.25	4.81	1.64	6.18	5.62	1	5	0	1	5	41	42	2	68	60	147	128	60	93	56	99	8	68	61	217	188	159	73	272
LOC105223455	23.19	24.92	24.82	23.59	24.18	27.17	27.68	33.18	27.98	27.29	19.96	19.19	23.12	20.15	20.03	17.87	18.14	17.84	16.09	17.92	20.84	19.91	19.69	19.61	18.94	1067	969	1143	949	951	986	1352	1080	1029	1146	698	810	732	558	638	593	772	731	515	647	734	647	862	849
LOC105223456	1.13	0.95	1.3	1.15	1.03	1.13	1.01	0.76	0.77	0.94	0.93	1.08	1.03	0.97	1.09	1.47	1.83	1.77	2.05	2.14	1.68	1.57	1.63	1.4	1.53	163	115	187	145	127	128	154	77	89	123	102	142	102	84	109	153	243	227	205	242	185	160	223	189
LOC105223457	6.31	6.27	5.54	6.56	5.34	11.39	10.03	11.08	9.26	8.98	10.93	11.37	15.12	8.8	11.25	9.28	10.63	8.25	10.52	7.34	9.21	8.58	10.39	9.29	9.33	231	194	203	210	167	329	390	287	271	300	304	382	381	194	285	245	360	269	268	211	258	222	362	320
LOC105223458	0	0.12	0	0	0	0.82	1.08	0.98	1.93	0.71	1.18	1.52	2.74	1.65	0.65	1.03	1.18	1	0.5	0.95	0.78	0.63	0.73	0.79	1.38	0	2	0	0	0	13	23	14	31	13	18	28	38	20	9	15	22	18	7	15	12	9	14	15
LOC105223459	11.15	9.66	10.63	11.24	10.41	15.79	15.05	15.61	15.81	16.19	14.95	15.29	14.61	16.18	13.91	17.68	17.51	17.6	14.53	16.19	15.43	16.7	18.76	17.99	18.12	639	468	610	563	510	714	916	633	724	847	651	804	576	558	552	731	928	898	579	728	677	676	1023	970
LOC105223460	0	0.08	0	0	0	0.08	0.03	0.09	0	0.07	0	0	0	0	0	0	0	0	0	0	0	0	0.03	0	0	0	2	0	0	0	2	1	2	0	2	0	0	0	0	0	0	0	0	0	0	0	0	1	0
LOC105223461	1577.36	1519.18	1448.69	1441.51	1415.96	1866.03	1848.97	1652.84	1879.87	1863.1	1716.68	1687.4	1703.03	1735.8	1776.35	1573.86	1547.08	1462.36	1456.56	1343.23	1235.11	1252.15	1529.21	1367.1	1283.87	20617.3	16780.3	18945.5	16469.4	15817.3	19232.5	25655.2	15279.4	19633.7	22219.3	17046.6	20225.3	15313.2	13652.9	16067.1	14832.7	18697.4	17014.5	13237.6	13774	12354.6	11557.3	19015.2	16810.8
LOC105223462	4.61	2.48	3.07	2.06	2.45	2.35	3.42	2.57	2.34	2.91	2.76	4.26	4.87	3.25	6.25	2.32	2.42	2.82	1.61	2.49	2.55	1.19	2.44	3.56	1.77	33	15	22	12.92	15	13.27	26	13	13.42	19	15	28	24	14	31	12	16	18	8	14	14	6	16.66	24
LOC105223463	0.87	0.88	1.05	0.68	0.99	0.58	0.66	0.47	0.34	0.59	0.7	0.74	0.72	0.67	0.8	1.06	1.4	1.01	0.87	1.26	0.72	1.01	1.17	0.98	0.94	114	97	137	78	111	60	91	43	35	70	69	89	65	53	72	100	169	117	79	129	72	93	145	120
LOC105223466	0.14	0.29	0.14	0.77	0.17	0.72	0.86	0.85	0.35	1.05	0.79	0.96	0.62	0.82	1.02	0.59	0.5	0.67	0.61	1.26	0.97	0.9	1.26	1.13	1.47	4	7	4	19	4	16	26	17	8	27	17	25	12	14	20	12	13	17	12	28	21	18	34	30
LOC105223467	0.02	0	0.04	0.03	0	0.17	0.04	0.06	0.14	0.1	0.03	0.02	0.1	0.04	0.06	0.03	0.1	0.08	0.16	0.31	0.15	0.22	0.19	0.21	0.09	1	0	2	1	0	6	2	2	5	4	1	1	3	1	2	1	4	3	5	11	5	7	8	9
LOC105223469	0	0	0	0	0	0	0	0	0	0	0	0	0	0	0	0	0	0	0	0	0	0	0	0	0	0	0	0	0	0	0	0	0	0	0	0	0	0	0	0	0	0	0	0	0	0	0	0	0
LOC105223470	0.66	0.1	0.16	1.22	0	7.62	0	0	0	0	2.27	0	0	0	0	0	0	0	0	0	0	0	0	0	0	8	1	2	13	0	73	0	0	0	0	21	0	0	0	0	0	0	0	0	0	0	0	0	0
LOC105223472	0	0	0	0	0	1.26	0.86	1.06	2.18	1.46	1.31	1.54	1.09	1.38	2.28	1.73	0.18	2.05	1.31	2.12	3.8	2.23	2.01	2.47	2.73	0	0	0	0	0	12	11	9	21	16	12	17	9	10	19	15	2	22	11	20	35	19	23	28
LOC105223473	0	0	0	0	0	0.18	0.48	0.41	1	0.32	0	0	0	0.24	0.32	0	0	0	0	0	0	0	0	0	0	0	0	0	0	0	2	7	4	11	4	0	0	0	2	3	0	0	0	0	0	0	0	0	0
LOC105223474	0.14	0	0	0.08	0.08	0.26	0.32	0.67	0.34	0.22	0.18	0	0	0.23	0.4	0.19	0.22	0.08	0.1	0.35	0.09	0.19	0.36	0.36	0.17	2	0	0	1	1	3	5	7	4	3	2	0	0	2	4	2	3	1	1	4	1	2	5	5
LOC105223475	3.69	4.2	3.1	5.41	3.29	7.21	5.01	6.37	7.76	6.32	9.81	5.88	4.83	7.48	7.57	8.91	5.19	6.63	5.74	9.31	7.62	3.76	8.3	6.28	7.47	50	48	42	64	38	77	72	61	84	78	101	73	45	61	71	87	65	80	54	99	79	36	107	80
LOC105223477	0.44	0.26	0.95	0.42	0.77	9.65	3.79	4.65	6.77	6.01	3.76	2.23	6.27	3.28	5.39	6.39	2.61	10.68	5.47	4.1	4.11	3.83	4.23	2.02	4.63	6	3	13	5	9	104	55	45	74	75	39	28	59	27	51	63	33	130	52	44	43	37	55	26
LOC105223478	0.89	0.86	0.56	0.89	0.65	0.42	0.52	0.63	0.49	0.67	0.59	0.24	0.24	0.09	0.48	0.15	0.54	0.56	0.88	0.21	0.29	0	0.12	0.18	0.07	16	13	10	14	10	6	10	8	7	11	8	4	3	1	6	2	9	9	11	3	4	0	2	3
LOC105223479	3.05	3.21	2.52	2.59	2.11	1.44	1.4	1.69	1.6	1.89	2.71	2.04	1.5	1.43	1.37	2.85	1.25	1.51	2.72	2.06	1.95	1.37	2.03	1.63	2.71	145	129	120	108	86	54	71	57	61	82	98	89	49	41	45	98	55	64	90	77	71	46	92	73
LOC105223480	0	0	0	0	0	0	0	0	0	0	0	0	0	0	0	0	0	0	0	0	0	0	0	0	0	0	0	0	0	0	0	0	0	0	0	0	0	0	0	0	0	0	0	0	0	0	0	0	0
LOC105223481	0.11	0.12	0.04	0.14	0.11	0.21	0.37	0.24	0.31	0.28	0.33	0.25	0.42	0.31	0.14	0.54	0.48	0.36	0.44	0.61	0.65	0.43	0.43	0.59	0.6	10	9	4	11	9	15	36	16	23	24	23	21	27	17	9	36	41	30	28	44	46	28	38	51
LOC105223482	1.03	2.04	1.31	1.73	0.89	1.83	1.88	2.14	2.32	4.52	3.08	1.05	0.5	2.86	1.69	3.44	1.41	3.56	2.37	1.75	3.69	2.44	2.1	1.83	2.18	15	25	19	22	11	21	29	22	27	60	34	14	5	25	17	36	19	46	24	20	41	25	29	25
LOC105223483	0	0	0	0	0	0	0	0	0	0	0	0	0	0	0	0	0	0	0	0	0	0	0	0	0	0	0	0	0	0	0	0	0	0	0	0	0	0	0	0	0	0	0	0	0	0	0	0	0
LOC105223484	572.79	417.18	423.53	494.04	419.98	503.03	381.77	369.23	517.74	424.5	419.69	401.79	348.21	362.62	446.57	361.47	342.61	325.37	324.67	303.65	304.47	300.65	396.33	348.66	352.43	4780	2937	3534	3602	2993	3306	3382	2173	3447	3229	2653	3073	1999	1817	2575	2172	2642	2413	1882	1988	1938	1768	3138	2729
LOC105223485	0	0	0	0	0	0	0	0.03	0	0	0	0	0.08	0	0	0	0	0	0	0	0	0	0	0	0	0	0	0	0	0	0	0	1	0	0	0	0	3	0	0	0	0	0	0	0	0	0	0	0
LOC105223486	1.5	1.85	2.12	1.71	2.57	1.87	2.42	1.89	2.58	2.3	1.66	1.9	2.08	3.03	1.99	2.92	2.73	1.71	3.2	2.46	2.67	2.3	1.97	3.32	3.39	40	42	57	40	59	37	69	36	55	55	34	47	38	49	37	55	68	39	59	49	55	41	47	84
LOC105223488	0.45	0.61	0.76	0.55	0.85	0.79	0.91	0.68	0.52	1.06	1.31	1.01	1.1	0.86	0.55	0.81	0.6	0.89	0.89	1.05	0.94	0.73	1.27	0.44	1.31	13	15	22	14	21	18	28	14	12	28	29	27	22	15	11	17	16	23	18	24	21	15	35	12
LOC105223489	0.02	0.03	0.24	0.02	0.15	0.08	0	0.03	0.19	0.09	0.14	0.02	0	0	0.06	0.09	0	0.05	0.03	0.08	0.06	0	0.07	0.07	0.08	1	1	11	1	6	3	0	1	7	4	5	1	0	0	2	3	0	2	1	3	2	0	3	3
LOC105223490	0	0	0	0	0	0	0	0	0	0	0	0	0	0	0	0	0	0	0	0.12	0	0	0	0.1	0	0	0	0	0	0	0	0	0	0	0	0	0	0	0	0	0	0	0	0	1	0	0	0	1
LOC105223491	23.88	25.2	23.91	29	24.86	21.3	18.97	20.16	19.07	19.24	20.05	21.67	21.56	20.51	21.24	19.22	21.54	22.22	23.13	23.22	23.93	21.13	24.21	25.52	24.24	536	478	537	569	477	377	452	320	342	394	342	446	333	277	330	311	447	444	361	409	411	335	517	539
LOC105223492	6.72	8.85	7.78	8.79	6.25	14.58	13.28	15.18	13.95	13.33	12.26	13.65	12.57	14.46	11.32	14.82	11.83	13.03	14.34	12.13	13.23	12.32	13.05	14.55	13.84	132	147	153	151	105	226	277	211	219	239	183	246	170	171	154	210	215	228	196	187	199	171	244	269
LOC105223494	0.54	0.48	0.27	0.07	0.5	2.51	1.15	1.27	1.2	1.8	2.71	1.67	2.69	2.48	1.47	3.08	2.78	2.18	3.11	2.87	1.94	1.9	1.86	2.47	1.25	18	17	10	2	18	67	41	30	32	60	69	52	62	51	34	75	86	67	73	76	51	45	60	78
LOC105223495	0.71	0.55	0.69	0.63	0.72	0.49	0.8	0.68	0.71	0.46	0.74	0.71	0.44	0.41	0.59	0.69	0.87	0.65	0.82	1.1	1.13	0.99	0.92	0.97	1.56	61	40	59	47	53	33	73	41	49	36	48	56	26	21	35	43	69	50	49	74	74	60	75	78
LOC105223496	4.7	4.28	4.45	4.12	4.9	2.83	4.7	2.74	2.96	3.03	4.57	4.32	3.58	3.25	4.51	7.43	7.17	7.73	7.8	8.75	12.45	12.03	12.54	11.93	12.7	601	463	570	461	536	285	638	248	303	354	444	507	315	250	399	685	848	880	694	878	1219	1087	1526	1436
LOC105223497	6.73	6.71	7.27	6.5	6.88	12.65	13.16	14.3	10.28	12.66	11.32	9.86	13.52	9.85	9.99	15.46	10.68	12.52	11.75	12.34	11.54	13.94	14.76	14.23	14.75	667	562	720	563	582	988	1384	1002	814	1144	852	896	921	587	685	1104	978	1104	809	959	875	975	1391	1326
LOC105223498	0.09	0	0.13	0.15	0	0.09	0	0	0	0	0	0	0	0.02	0	0	0.02	0.04	0	0	0.02	0.19	0.01	0.03	0	3	0	2	2	0	1	0	0	0	0	0	0	0	1	0	0	2	3	0	0	1	2	1	2
LOC105223499	10.29	12.03	11.72	7.7	11.94	17.93	18.15	18.59	16.18	17.8	15.18	19.65	18.69	18.14	16.46	14.86	16.09	16.56	17.49	16.57	17.06	17.09	21.87	19.39	20.18	933	920	1063	611	923	1284	1742	1188	1169	1476	1048	1632	1164	988	1032	974	1350	1337	1099	1180	1189	1096	1883	1658
LOC105223500	0.68	0.82	0.47	0.62	0.74	0.56	0.6	0.68	0.71	0.8	0.67	0.65	0.72	0.82	0.64	0.84	0.67	0.71	0.84	0.97	1.17	0.73	0.73	0.7	0.9	54	55	37	43	50	35	50	38	45	58	40	47	39	39	35	48	49	50	46	60	71	41	55	52
LOC105223501	17.4	20.83	18.18	20.06	18.68	13.28	16.03	14.43	13.27	15.85	11.28	12.91	11.32	12.61	14.94	11.43	12.45	13.23	13.46	12.76	12.65	12.88	12.59	13.14	12.09	266	269	278	268	244	160	260	156	162	221	131	181	119	116	158	126	176	180	143	153	148	139	183	189
LOC105223502	0	0	0	0.31	0.05	0	0	0	0.06	0	0.12	0	0	0	0	0	0.05	0	0	0	0	0.13	0	0	0.06	0	0	0	6	1	0	0	0	1	0	2	0	0	0	0	0	1	0	0	0	0	2	0	0
LOC105223503	7.67	7.53	6.79	4.59	5.1	14.48	15.76	11.33	18.76	22.82	14.34	13.78	9.37	11.87	14.86	9.06	9.14	10.38	9.27	12.66	12.87	12.22	13.1	11.48	10.58	88	73	78	46	50	131	192	92	172	239	125	145	74	82	118	75	97	106	74	114	113	99	143	124
LOC105223504	1.22	0.87	0.34	1.78	1.32	0.31	0.26	0.13	0.84	0.4	1.08	0.56	0.13	0.56	0.4	0.38	0.26	0.48	0.18	0.16	0.64	0.43	0.22	0.62	0.58	40	24	11	51	37	8	9	3	22	12	27	17	3	11	9	9	8	14	4	4	16	10	7	19
LOC105223505	26.19	24.44	24.85	28.04	24.8	51.1	42.04	41.46	47.18	49.08	43.92	42.73	36.69	40.52	41.55	36.54	36.12	36.67	34.75	34.15	34.72	35.43	38.47	32.98	34.61	828	653	786	775	670	1274	1411	927	1192	1416	1055	1239	798	771	909	833	1056	1032	764	847	840	791	1157	981
LOC105223506	0.34	0.37	0.36	0.63	0.11	0.37	0.57	0.58	0.51	0.61	0.1	0.34	0.56	0.44	0.66	0.4	0.65	0.54	0.83	0.64	0.5	0.75	0.56	0.26	0.46	14	13	15	23	4	12	25	17	17	23	3	13	16	11	19	12	25	20	24	21	16	22	22	10
LOC105223507	1.46	1.23	1.28	1.68	1.19	1.46	1.38	1.47	1.59	1.29	1.93	1.79	1.6	1.45	1.68	2.01	1.92	1.78	1.9	2.47	2.06	1.68	2.07	2	1.84	169	121	149	170	118	134	170	121	147	137	170	191	128	101	135	168	206	184	153	225	183	138	229	218
LOC105223508	6.63	4.99	6.44	4.46	6.97	3.73	6.51	2.92	3.49	4.27	2.28	2.96	1.79	1.34	1.73	6.1	5.99	4.67	5.91	7.25	4.81	4.79	3.78	4.8	4.8	437	278	425	257	393	194	456	136	184	257	114	179	81	53	79	290	365	274	271	375	243	223	237	298
LOC105223509	0.16	0	0	0	0	0.12	0.12	0	0.08	0.21	0.04	0.21	0.19	0.21	0.05	0.35	0.1	0.22	0.14	0.61	0.21	0.41	0.3	0.31	0.49	5	0	0	0	0	3	4	0	2	6	1	6	4	4	1	8	3	6	3	15	5	9	9	9
LOC105223510	0	0	0	0	0	0	0.25	0.13	0.22	0	0	0	0	0.15	0	0	0	0.2	0.13	0.11	0	0	0	0.1	0	0	0	0	0	0	0	3	1	2	0	0	0	0	1	0	0	0	2	1	1	0	0	0	1
LOC105223511	25.5	26.17	21.75	21.18	25.13	41.01	28.51	29.57	33.1	27.91	29.66	24.04	28.56	24.32	29.05	16.58	18.5	21	18.56	21.35	16.41	13.58	19.83	18.52	15.08	723	627	617	525	609	917	858	593	750	722	639	625	557	415	570	339	485	530	366	475	356	272	535	494
LOC105223512	0	0	0	0	0	0	0	0	0	0	0	0	0	0	0	0	0	0	0	0	0	0	0	0	0	0	0	0	0	0	0	0	0	0	0	0	0	0	0	0	0	0	0	0	0	0	0	0	0
LOC105223513	27.52	22.94	26.98	27.25	28.33	43.8	39.58	48.08	52.91	46.12	41.98	38.82	37.51	43.21	41.78	33.22	33.13	31.36	33.68	28.67	29.05	31.01	30.39	31.01	30.3	416	293	408	360	366	522	635	514	639	636	482	538	390	393	437	362	463	422	354	340	336	331	437	441
LOC105223514	0	0	0	0.09	0	0	0	0	0	0	0	0	0	0	0	0	0	0	0	0	0	0	0	0	0	0	0	0	1	0	0	0	0	0	0	0	0	0	0	0	0	0	0	0	0	0	0	0	0
LOC105223516	1.28	0.51	0.87	1.36	1.42	1.01	1.06	1.31	1.23	1.84	0.53	0.95	1.51	1.83	1.09	0.64	0.73	1.26	1.59	1.26	1.51	0.52	1.38	1.17	1.09	22	7	15	20	21	13	19	16	17	29	7	15	17	18	13	8	11	19	18	17	20	6	22	19
LOC105223517	20.15	22.44	25.07	21.9	19.55	27.82	23.18	25.22	22.17	25.41	21.75	22.17	21.26	24.01	23.8	19.46	18.45	18.57	19.07	19.85	24.31	21.13	21.68	21.11	19.03	339	319	422	322	281	369	414	300	298	390	278	342	246	243	277	236	287	278	223	262	313	251	347	334
LOC105223518	9.95	10.37	9.49	9.73	9.33	8.44	7.76	10.72	8.5	8.96	10.67	10.21	9.39	12.38	6.95	7.68	7.98	6.07	12.8	8.32	9.82	7.28	7.97	10.09	7.01	151	133	144	129	121	101	125	115	103	124	123	142	98	113	73	84	112	82	135	99	114	78	115	144
LOC105223519	0.26	0.09	0.08	0.22	0.18	0	0	0	0	0	0.1	0.04	0	0	0.05	0	0	0	0.05	0.05	0	0	0	0	0.33	7	2	2	5	4	0	0	0	0	0	2	1	0	0	1	0	0	0	1	1	0	0	0	0
LOC105223520	0	0	0	0	0	0	0	0	0	0	0	0	0	0	0	0	0	0	0	0	0	0	0.12	0	0	0	0	0	0	0	0	0	0	0	0	0	0	0	0	0	0	0	0	0	0	0	0	2	0
LOC105223521	17.44	16.51	18.22	14.67	17.9	21.69	17.7	16.54	23.09	18.86	17.62	16.81	19.13	15.89	18.86	16.38	15.33	14.41	15.86	13.05	16.46	13.7	19.63	17.46	19.93	155	124	162	114	136	152	167	104	164	153	119	137	117	85	116	105	126	114	98	91	112	86	166	146
LOC105223522	0.04	0.04	0	0	0.04	0	0	0	0	0	0.05	0	0	0	0.05	0.05	0	0	0	0	0.05	0	0	0	0	1	1	0	0	1	0	0	0	0	0	1	0	0	0	1	1	0	0	0	0	1	0	0	0
LOC105223523	0.07	0	0	0.16	0	0	0	0	0	0	0	0	0	0.06	0	0	0	0	0.11	0	0.1	0	0.04	0.08	0	2	0	0	4	0	0	0	0	0	0	0	0	0	1	0	0	0	0	2	0	2	0	1	2
LOC105223524	0.35	0.47	0.57	0.66	0.1	27.56	43.31	64.95	168.03	64.22	348.04	334.38	199.55	567.73	566.72	462.34	26.08	436.24	290.8	699.11	752.55	757.15	247.33	442.5	492.58	8	9	13	13	2	491	1039	1038	3034	1324	5975	6929	3102	7720	8862	7533	545	8775	4569	12394	13014	12082	5317	9407
LOC105223525	0	0	0	0	0	0	0	0.13	1.05	0.82	0.12	0	0	0	0	0	0	0	0	0.12	0	0	0.2	0	0	0	0	0	0	0	0	0	1	9	8	1	0	0	0	0	0	0	0	0	1	0	0	2	0
LOC105223526	0	0	0	0.27	0	3.71	15.53	39.85	52.25	79.85	16.01	14.92	8.33	33.81	19.6	35.36	0.76	25.88	6.22	20.87	25.06	36.93	21.27	16.91	17.31	0	0	0	2	0	25	141	241	357	623	104	117	49	174	116	218	6	197	37	140	164	223	173	136
LOC105223528	0.45	0.2	0.22	0.26	0.8	40.41	43.68	59.33	185.41	99.14	179.35	196.03	102.18	247.42	264.79	262.04	18.22	256.39	152.11	554.18	579.65	621.07	225.05	367.88	347.36	8	3	4	4	12	568	831	739	2617	1613	2446	3201	1263	2645	3254	3368	294	4061	1901	7766	7892	7748	3792	6166
LOC105223529	42.68	41.63	43.72	44.32	44.47	55.71	55.86	49.94	51.73	53.57	61.6	60.78	62.98	58.38	60.8	69.08	73.79	71.35	68.3	69.74	73.79	68.63	73.08	73.61	65.71	922	760	945	837	821	949	1281	763	893	1056	1011	1204	936	759	909	1076	1474	1372	1026	1182	1220	1047	1502	1496
LOC105223530	9.82	14.07	2.55	5.94	7.29	420.72	412.62	606.12	1868.72	1262.49	2135.81	2952.53	1063.54	2955.67	1812.19	2633.52	446.47	2387.42	1852.7	4346.15	4673.15	7193.26	2234.19	3183.62	3970.89	104	126	27	55	66	3515	4641	4542	15821	12205	17192	28687	7752	18845	13287	20119	4374	22517	13649	36127	37892	53820	22520	31734
LOC105223531	0.08	0.1	0	0.09	0	20.72	4	10.85	33.83	25.24	12.9	19.68	4.87	29.2	42.6	24.36	4.68	28.72	12.45	39.58	61.92	55.17	22.92	26.39	26.87	1	1	0	1	0	200	52	94	331	282	120	221	41	215	361	215	53	313	106	380	580	477	267	304
LOC105223532	0	0.14	0.82	0.27	0.27	99.28	79.6	41.26	238.78	151.18	346.79	324.88	134.59	333.04	424.42	177.5	65.28	212.9	180.86	333.58	409.66	338.74	138.59	266.47	301.3	0	1	7	2	2	668	721	249	1628	1177	2248	2542	790	1710	2506	1092	515	1617	1073	2233	2675	2041	1125	2139
LOC105223533	0.11	0.13	0	0	0	0	0.21	0	0.14	1.12	0	0	0	0	0	0	0	0	0	0	0	0	0	0	0	1	1	0	0	0	0	2	0	1	9	0	0	0	0	0	0	0	0	0	0	0	0	0	0
LOC105223534	80.29	82.78	83.65	83.46	83.22	68.75	67.7	62.85	69.57	73.44	66.34	61.22	70.85	75.72	63.59	67.68	67.25	68.77	70.53	74.08	75.03	75.28	77.42	77.17	74.21	5711	4976	5953	5189	5059	3856	5112	3162	3954	4766	3585	3993	3467	3241	3130	3471	4423	4354	3488	4134	4084	3781	5239	5164
LOC105223535	1.21	1.03	1.35	1.37	1.26	3.47	3.43	2.68	3.29	3.27	2.74	3.14	3.28	3.13	2.2	3.5	3.65	3.72	3.42	2.86	3.62	2.84	3.71	3.67	3.66	78	56	87	77	69	176	234	122	169	192	134	185	145	121	98	162	217	213	153	144	178	129	227	222
LOC105223536	3.62	3.06	3.33	3.24	3.24	1.39	2.51	1.53	1.31	1.74	1.92	1.89	1.77	1.62	2.11	2.87	2.98	2.51	2.78	2.68	2.67	3.15	3.22	3.48	3.41	238	170	219	186	182	72	175	71	69	104	96	114	80	64	96	136	181	147	127	138	134	146	201	215
LOC105223537	15.19	12.51	14.08	13.07	14.09	9.72	10.83	9.24	10.05	9.61	9.71	10.68	9.77	9.56	9.71	12.09	10.93	12.06	11.01	11.71	12.15	12.25	11.65	11.99	13.32	1157	805	1073	870	917	584	876	498	612	668	562	746	512	438	512	664	770	818	583	700	708	659	844	859
LOC105223538	14.46	13.99	14.16	14.44	12.94	10.59	12.98	12.67	11.89	13.95	10.57	10.5	11.45	12.23	10.81	13.48	11.81	13.14	12.89	12.63	15.5	14.36	14.72	14.11	13.78	651	509	630	520	480	404	612	400	427	577	357	432	354	314	329	428	476	487	384	447	496	446	581	576
LOC105223539	0	0	0	0	0	0	0	0	0	0	0	0	0	0	0	0	0.04	0	0	0	0.04	0	0	0	0.04	0	0	0	0	0	0	0	0	0	0	0	0	0	0	0	0	1	0	0	0	1	0	0	0
LOC105223540	11.59	11.03	10.9	10.9	12.4	16.35	13.15	15.35	14.5	15.27	14.33	12.21	16.43	14.88	14.9	13.47	13.43	14.33	14.16	12.51	10.89	12.35	13.22	14.23	13.08	445	358	419	366	407	495	536	417	445	535	418	430	434	344	396	373	477	490	378	377	320	335	483	514
LOC105223541	2.23	2.06	2.03	2.24	2.34	0.76	1.08	1.19	0.88	1.07	1.29	1.12	1.11	1.47	1.15	1.38	1.16	1.61	1.32	1.64	1.52	1.51	1.9	1.62	1.78	146	114	133	128	131	39	75	55	46	64	64	67	50	58	52	65	70	94	60	84	76	70	118	100
LOC105223542	36.33	27.08	26.87	25.61	30.72	50.36	38.41	37.2	44.39	40.34	36.91	35.17	33.94	45.48	43.05	35.75	36.05	31.69	36.75	35.93	34.26	32.86	30.72	34.67	38.94	327	206	243	201	232	350	362	234	319	330	251	290	210	241	261	236	304	258	225	255	234	205	263	297
LOC105223543	7.74	8.98	8.54	8.46	8.24	7.39	7.79	5.97	7.07	6.79	8.44	9.36	8.33	8.35	9.13	8.92	9.5	9.73	8.35	11.09	11.09	10.22	11.9	11.22	11.01	396	388	437	378	360	298	423	216	289	317	328	439	293	257	323	329	449	443	297	445	434	369	579	540
LOC105223545	0.59	1.13	0.53	1.84	1.04	5.26	0.53	0.14	0.37	1.55	0.74	0	0.05	0.05	0	0	0.04	0.07	0.38	0.13	0.21	0.05	0.1	0.14	0	18	29	16	49	27	126	17	3	9	43	17	0	1	1	0	0	1	2	8	3	5	1	3	4
LOC105223546	0	0	0	0	0	0	0	0	0	0	0	0	0	0.11	0	0	0	0	0	0	0	0	0	0	0	0	0	0	0	0	0	0	0	0	0	0	0	0	1	0	0	0	0	0	0	0	0	0	0
LOC105223547	0.45	1.27	0.31	1.64	0.52	4.21	0.25	0.25	0.34	0.1	1.06	0.2	0.26	0	0	0	0.19	0.2	0.26	0.17	0.23	0.19	0.19	0.05	0.23	10	24	7	32	10	74	6	4	6	2	18	4	4	0	0	0	4	4	4	3	4	3	4	1
LOC105223548	7.32	8.04	8.23	8.61	7.58	6.1	5.45	4.95	6.04	5.47	4.46	4.02	5.52	4.11	2.48	3.78	2.18	3.32	2.93	3.56	2.96	3.62	3.46	4.18	3.62	320	296	360	328	282	210	253	153	210	218	147	159	166	108	75	119	88	129	89	122	99	111	144	172
LOC105223549	7.97	6.01	5.97	6.37	6.6	2.21	3.01	1.9	2.5	2.39	2.91	3.36	2.19	2.02	2.78	3.88	4.81	4.22	4.07	5.55	6.21	7.81	6.98	7.37	7.81	439	280	329	307	311	96	176	74	110	120	122	170	83	67	106	154	245	207	156	240	262	304	366	382
LOC105223550	0.75	1.35	0.54	1.31	0.67	1.04	0.91	0.96	1.3	1.18	0.8	0.39	0.62	0.83	0.52	0.74	0.77	0.48	0.62	0.5	0.79	1.11	1.17	0.87	0.95	21	32	15	32	16	23	27	19	29	30	17	10	12	14	10	15	20	12	12	11	17	22	31	23
LOC105223551	9.06	7.59	8.93	10.07	9.6	7.72	8.1	7.95	9.27	9.64	6.44	5.63	7.5	9.24	8.99	7.52	7.16	6.02	8.18	6.66	8.3	6.93	5.49	7.31	8.2	137	97	135	133	124	92	130	85	112	133	74	78	78	84	94	82	100	81	86	79	96	74	79	104
LOC105223552	5.72	5.92	6	5.59	5.91	5.76	5.28	4.8	5.76	6.16	6.91	7	4.74	6.13	5.9	5.93	5.22	5.53	5.18	6.67	8.28	8.1	9.26	8.27	7.41	487	426	511	416	430	387	477	289	392	479	447	547	278	314	348	364	411	419	307	446	540	487	750	663
LOC105223553	0.06	0	0	0	0	0	0.05	0	0	0	0	0	0	0	0	0	0	0	0	0	0	0	0	0	0	1	0	0	0	0	0	1	0	0	0	0	0	0	0	0	0	0	0	0	0	0	0	0	0
LOC105223554	0.58	1.15	0.95	0.91	1.22	1.95	1.58	1.23	1.49	1.43	1.28	1.46	1.51	1.24	1.49	1.03	1.07	0.99	1.14	0.96	0.73	1.26	0.96	0.83	0.96	69	116	114	95	125	184	200	104	142	156	116	160	124	89	123	89	118	105	95	90	67	106	109	93
LOC105223555	0.04	0	0.02	0.01	0.01	0.01	0.01	0	0	0.01	0.01	0.02	0	0	0	0	0.02	0.01	0	0.02	0	0.01	0	0	0	5	0	2	1	1	1	1	0	0	1	1	2	0	0	0	0	2	1	0	2	0	1	0	0
LOC105223556	7.71	7.26	6.02	6.45	6.77	13.37	12.62	11.6	13.97	17.32	11.87	11.72	12.06	10.32	12.31	14.2	12.2	15.03	13.26	15.9	16.96	16.38	14.63	16.08	17.79	484	385	378	354	363	662	841	515	701	992	566	675	521	390	535	643	708	840	579	783	815	726	874	950
LOC105223557	8.78	8.13	8.77	8.91	8.28	8.02	7.89	7.54	9.17	8.52	7.87	7.63	7.88	8.5	6.97	8.08	8.04	8.7	6.84	7.72	7.33	8.52	8.73	9.28	8.53	690	540	690	612	556	497	658	419	576	611	470	550	426	402	379	458	584	609	374	476	441	473	653	686
LOC105223558	3.63	2.43	3.15	3.48	2.92	0.7	0.62	0.73	0.73	0.68	0.53	0.76	0.59	0.49	0.74	1.07	1.11	1.07	1.05	1.35	0.77	1.92	0.89	0.82	1.67	99	56	86	83	68	15	18	14	16	17	11	19	11	8	14	21	28	26	20	29	16	37	23	21
LOC105223559	2.82	2.65	2.66	3.4	2.59	2.61	2.88	1.7	2.32	1.74	2.54	3.67	1.97	2.51	3.43	4.41	4.2	3.87	4.58	5.09	6.34	5.43	6.33	6.79	4.62	108	86	102	114	85	79	117	46	71	61	74	129	52	58	91	122	149	132	122	153	186	147	231	245
LOC105223560	0.59	0	0.59	1.01	0.17	0.75	0.42	0.63	0.37	0.65	0.19	0.16	0.21	0.25	0.64	0.2	0.8	0.66	0	0.56	1.16	0	2.17	0.47	0.19	4	0	4	6	1	4	3	3	2	4	1	1	1	1	3	1	5	4	0	3	6	0	14	3
LOC105223561	6.61	6.9	7.23	6.1	7.26	1.74	3.71	1.87	2.59	2.3	5.32	4.89	4.64	3.69	4.79	7.12	7.77	8.29	10.11	9.28	8.8	8.97	8.25	9.96	8.64	265	234	290	214	249	55	158	53	83	84	162	180	128	89	133	206	288	296	282	292	270	254	315	376
LOC105223562	7.79	6.66	5.63	11.08	6.83	4.27	4.24	4.71	7.43	2.94	3.84	4.12	3.24	4.74	4.71	5	3.9	6.21	5.83	3.98	4.58	6.22	6.39	4.01	4.78	227	164	164	282	170	98	131	97	173	78	85	110	65	83	95	105	105	161	118	91	102	128	177	110
LOC105223563	4.35	5.24	4.79	4.05	3.52	5.45	4.42	4.63	5.7	5.34	3.31	3.91	3.81	4.83	3.9	4.43	3.88	5.06	4.14	4.71	5	5.9	5.45	5.4	6.63	166	169	183	135	115	164	179	125	174	186	96	137	100	111	103	122	137	172	110	141	146	159	198	194
LOC105223564	2.1	2.75	1.95	2.39	3.57	4.38	1.83	1.48	3.1	3.59	1.18	1.23	0.98	1.12	1.84	1.25	1.53	1.6	0.86	1.33	2.25	1.91	1.8	1.43	2.28	28	31	26	28	41	46	26	14	33	44	12	15	9	9	17	12	19	19	8	14	23	18	23	18
LOC105223565	0.06	0	0	0	0.22	1.2	0.12	0.53	0.16	0.48	0	0.07	0	0.21	0.09	0	0	0.07	0	0	0	0	0	0.07	0.08	1	0	0	0	3	15	2	6	2	7	0	1	0	2	1	0	0	1	0	0	0	0	0	1
LOC105223566	1.76	1.6	1.12	1.72	1.46	1.75	2.96	2.22	5.44	4.15	7.08	7.13	5.75	9.86	13.58	8.86	2.37	8.09	7.08	12.94	14.67	13.76	6.55	8.34	10.17	82	63	52	70	58	64	146	73	202	176	250	304	184	276	437	297	102	335	229	472	522	452	290	365
LOC105223567	0.01	0.06	0.01	0	0.09	0	0	0	0.03	0	0	0	0	0	0	0	0	0	0.02	0	0.03	0	0	0	0.05	1	4	1	0	6	0	0	0	2	0	0	0	0	0	0	0	0	0	1	0	2	0	0	0
LOC105223569	0	0	0	0	0	0	0	0	0	0	0	0.05	0	0	0	0	0	0	0	0	0	0	0	0	0.03	0	0	0	0	0	0	0	0	0	0	0	2	0	0	0	0	0	0	0	0	0	0	0	0
LOC105223570	25.82	25.59	28.49	27.14	25.07	31.85	29.81	27.2	28.44	26.71	23.88	21.2	20.57	24.18	22.61	19.56	22.15	22.79	25.3	22.68	22.47	22.72	24.78	23.26	26.48	518	434	572	476	430	504	635	386	456	489	364	390	284	292	314	283	411	407	353	357	345	322	473	439
LOC105223572	4.15	3.76	3.6	3.55	4.19	2.64	3.37	2.7	2.74	2.47	2.83	3.19	2.96	2.73	2.97	2.92	3.36	2.97	3.17	3.56	2.98	2.65	3.86	2.97	3.18	444	340	385	332	383	223	383	204	234	241	230	313	218	176	220	225	332	283	236	299	244	200	393	299
LOC105223573	34.26	31.71	31.18	34.92	31.37	12.9	11.64	11.65	12.48	11.44	11.4	10.39	11.52	9.98	9.57	12.42	10.48	11.43	10.94	12.01	10.51	10.73	12.82	11.38	11.09	2287	1789	2083	2038	1790	679	825	550	666	697	578	636	529	401	442	598	647	679	508	629	537	506	814	715
LOC105223574	12.85	13.14	13.38	12.18	12.8	9	12.17	8.91	9.58	10.51	11.4	12.19	10.12	10.95	12.43	16.28	15.57	15.92	17.55	18.81	16.85	18.49	15.18	14.33	16.05	1524	1324	1594	1268	1314	854	1548	748	901	1142	1035	1323	838	780	1014	1405	1712	1697	1460	1765	1535	1546	1723	1599
LOC105223575	12.03	9.6	12.09	9.97	9.25	11.57	14.58	11.47	12.77	14.52	16.72	16.58	17.59	16.29	21.98	18.75	17.54	19.21	18.66	19.38	19.43	16.94	18.26	18.46	18.9	178	120	179	129	117	135	229	120	151	196	188	225	179	145	225	200	240	253	192	225	220	177	257	257
LOC105223576	37.29	38.07	39.18	40.08	37.4	31.12	32.09	31.18	33.18	35.61	32.9	32.44	31.13	34.7	31.66	32.94	30.58	32.44	33.54	34.71	35.37	35.47	35.23	37.28	33.9	1611	1389	1692	1514	1382	1058	1469	952	1144	1403	1078	1284	926	901	946	1024	1218	1247	1006	1175	1168	1082	1449	1516
LOC105223577	16.89	15.54	15.42	16.12	17.07	12.84	16.88	11.71	11.84	11.97	14.84	17.84	12.54	14.93	15.91	25.47	24.67	22.84	23.67	25.88	22.17	25.81	22.84	25.13	26.55	1682	1310	1541	1403	1457	1003	1784	825	931	1089	1122	1642	861	897	1090	1828	2278	2035	1646	2018	1691	1819	2179	2375
LOC105223578	13.76	11.81	13.02	12.4	9.97	13.9	12.04	17.04	12.49	13.21	19.55	18.32	12.39	14.97	19.53	19.08	19.22	17.51	17.51	20.17	17.5	20.69	18.17	19.02	21.72	113	82	107	89	70	90	105	99	82	99	122	138	70	74	111	113	146	128	100	130	110	120	142	147
LOC105223579	19.92	20.37	20.04	20.08	19.81	32.37	29.65	28.6	30.93	30.48	27.72	27.49	29.36	28.1	25.78	32.01	29.86	31.91	31.21	28.42	32.08	29.95	35.25	30.77	32.72	1369	1183	1378	1206	1163	1754	2163	1390	1698	1911	1447	1732	1388	1162	1226	1586	1897	1952	1491	1532	1687	1453	2304	1989
LOC105223580	3.35	3.08	3.02	3.57	3.32	1.67	1.76	1.39	1.36	1.76	1.57	2.08	1.05	1.5	1.95	3.32	3.02	2.76	3.73	3.57	3.46	3.25	2.26	2.85	2.92	389	302	347	366	325	154	215	113	127	185	136	221	85	106	156	279	327	281	300	328	307	269	246	306
LOC105223581	144.75	146.93	154.24	141.24	150.78	73.47	106.93	77.1	78.26	81.38	123.1	131.2	101.64	109.45	136.61	183.19	163.76	165.85	172.57	195.3	189.3	190.91	174.22	188.54	185.26	6514.97	5588.36	6945.42	5556.29	5799.51	2607.43	5108.88	2454.26	2814.43	3341.75	4209.03	5414.99	3146.95	2964.26	4254.84	5944.72	6814.64	6644.52	5400.34	6896.01	6519.91	6067.53	7459.71	7983
LOC105223582	10.97	11.18	11.61	11.64	11.67	15.28	11.83	14.44	13.8	12.99	9.36	12.4	13.15	11.64	11.81	11.28	11.06	10.92	9.99	10.74	10.88	12.26	11.11	10.78	10.81	396.03	340.64	414.58	371.71	349.49	419.57	444.12	361.74	402.57	420.25	256.97	399.01	323.05	258.74	293.16	298.28	371.36	345.48	255.66	307.99	295.09	311.47	372.29	358
LOC105223583	7.84	8.62	7.15	8.92	9.17	11.12	9.97	10.24	9.91	10.07	9.92	9.61	9.05	10.07	9.55	10.57	11.22	10.28	11.03	8.64	11.68	10.5	11.17	10.63	8.68	185	172	169	184	185	207	250	171	187	217	178	208	147	143	156	180	245	216	181	160	211	175	251	236
LOC105223584	13.27	12.35	10.74	10.02	11.6	17.55	16.6	17.64	18.57	16.72	17.46	16.07	19.28	16.38	16.37	14.62	16.62	12.96	13.57	13.17	16.17	15.82	14.28	16.39	13.2	253	199	205	167	189	264	336	238	283	291	253	281	253	188	216	201	293	220	180	197	236	213	259	294
LOC105223585	4.66	5.25	5.77	5.54	6.39	7.04	6.94	6.77	7.41	6.91	7.78	7.51	6.75	6.61	6.85	7.5	7.09	7.94	7.64	8.08	8.69	7.69	6.99	8.37	7.72	198.53	188.86	245.88	206.42	232.62	236.65	313.82	203.93	252.29	268.69	251.8	293.55	197.98	169.47	201.89	230.27	279.13	301.04	226.19	270.19	283.26	231.39	283.5	335.56
LOC105223586	0	0	0.04	0	0	0	0	0	0	0	0	0	0	0	0	0	0	0	0	0	0	0	0	0	0	0	0	3	0	0	0	0	0	0	0	0	0	0	0	0	0	0	0	0	0	0	0	0	0
LOC105223587	13.42	13.85	13.18	14.37	12.1	12.68	13.07	13.8	14.98	13.03	13.37	14.16	14.46	12.76	13.15	12.99	11.84	16.58	13.18	15.58	14.74	12.84	14.37	16.21	15.18	588.47	513.14	578.12	550.58	453.38	438.35	608.18	428.07	524.71	521.31	445.2	569.45	436.02	336.53	399.11	410.73	479.87	646.96	401.81	535.81	494.74	397.61	599.5	668.44
LOC105223588	0.23	0.14	0.23	0.2	0.2	0.37	0.44	0	0.07	0.26	0.08	0.32	0.25	0	0.17	0.08	0.44	0.07	0.25	0.07	0.23	0.16	0.12	0	0.15	4	2	4	3	3	5	8	0	1	4	1	5	3	0	2	1	7	1	3	1	3	2	2	0
LOC105223590	1.07	0.79	0.56	0.92	0.94	0.87	1.48	0.97	0.88	0.68	2.39	3.34	2.05	2.44	2.24	5.53	4.34	4.48	5.59	5.6	5.55	3.82	5.53	4.2	5.17	53	33	28	40	40	34	78	34	35	31	90	152	70	73	77	198	199	198	193	218	211	134	261	196
LOC105223591	0	0	0.01	0	0.01	0	0	0	0	0.01	0.01	0.01	0	0	0.02	0.01	0	0.02	0	0	0	0	0.01	0	0.05	0	0	1	0	1	0	0	0	0	1	1	1	0	0	1	1	0	2	0	0	0	0	1	0
LOC105223592	0.16	0.13	0.09	0.13	0.08	0.2	0.16	0.08	0.19	0.24	0.1	0.12	0.01	0.07	0.08	0.02	0.03	0.06	0.03	0.06	0.03	0.01	0.01	0.05	0.02	41	27	23	28	17	39	43	14	38	55	19	27	2	11	13	4	7	14	5	11	5	2	2	12
LOC105223593	0.39	0.46	0	0.1	0.15	95.31	0.08	0.37	0.11	0.33	1.15	0.24	0.25	0.14	0	0.18	0.09	0.2	0	0.06	0.06	0	0	0.14	0.06	9	9	0	2	3	1725	2	6	2	7	20	5	4	2	0	3	2	4	0	1	1	0	0	3
LOC105223594	0.07	0	0	0	0	0.89	0.53	0.4	0.62	0.23	1.02	0.46	0.61	0.47	0.41	0.98	0.3	0.16	0.4	0.36	0.37	0.2	1.18	0.6	0.27	1	0	0	0	0	10	8	4	7	3	11	6	6	4	4	10	4	2	4	4	4	2	16	8
LOC105223595	0	0	0	0	0	0	0	0	0	0.12	0	0	0	0	0	0	0	0	0	0	0	0	0	0	0	0	0	0	0	0	0	0	0	0	2	0	0	0	0	0	0	0	0	0	0	0	0	0	0
LOC105223596	0.37	0.15	0.15	0.07	0.14	0.16	0.49	0.04	0.31	0.24	0.2	0.27	0.63	0.05	0.53	0.26	0.63	0.38	0.31	0.12	0.12	0.35	0.36	0.46	0.31	12	4	5	2	4	4	17	1	8	7	5	8	14	1	12	6	19	11	7	3	3	8	11	14
LOC105223597	4.06	13.7	0	3.2	3.34	5.76	6.17	1.72	3.9	35.57	0	0.06	0.08	2.21	0.24	0.08	0.06	0.31	0.56	0	1.97	0.08	0.58	0	0	74	210	0	51	52	82	118	22	56	586	0	1	1	24	3	1	1	5	7	0	27	1	10	0
LOC105223598	1.8	6.1	0.16	2.71	2.87	6.02	11.33	1.85	6.14	31.82	0	0	0	3.26	0.12	0.11	0	0.46	0.94	0	5.66	0	2.49	0	0	22	63	2	29	30	58	147	16	60	355	0	0	0	24	1	1	0	5	8	0	53	0	29	0
LOC105223599	0	0.36	0	1.29	0	0.78	0	0.15	0	0	0.68	0	0	0	0	0	0.11	0	0	0	0	0	0	0	0.13	0	3	0	11	0	6	0	1	0	0	5	0	0	0	0	0	1	0	0	0	0	0	0	0
LOC105223600	0	0.13	0	0	0.4	0.72	0.11	0.48	0.43	0.37	0	0	0.66	0	0.49	0.47	0	0.13	0	0.43	0	0.32	0.12	0	0.14	0	1	0	0	3	5	1	3	3	3	0	0	4	0	3	3	0	1	0	3	0	2	1	0
LOC105223601	0.23	0	0	0.52	0	0.58	0.11	0.16	0	0	0.75	0	0	0.19	0	0	0.12	0	0	0.15	0	0	0	0	0	2	0	0	4	0	4	1	1	0	0	5	0	0	1	0	0	1	0	0	1	0	0	0	0
LOC105223602	7.06	6.2	5.81	6.41	7.03	5.4	5.46	4.78	5.05	5.21	5.71	6.29	4.76	4.47	5.92	6.77	6.8	5.9	7.6	7.39	6.2	6.55	6.42	5.16	6.4	1387	1029	1141	1100	1179	836	1137	664	792	933	852	1133	643	528	805	958	1234	1032	1038	1138	931	908	1200	953
LOC105223603	3.59	1.53	2.03	2.42	1.72	12.96	9.98	13.41	13.02	9.39	9.7	10.75	8.17	10.41	8.38	8.56	10.26	8.28	9.54	8.69	7.46	6.39	8.33	6.46	7.69	39	14	22	23	16	111	115	103	113	93	80	107	61	68	63	67	103	80	72	74	62	49	86	66
LOC105223604	962.77	911.02	961.78	851.56	1050.06	498.8	607.89	466.25	480.25	515.71	421.03	474.65	344.98	358.98	418.4	378.2	397.93	355.85	405.14	400.87	369.08	363.87	424.13	370.26	407.68	66166	52910	66127	51153	61672	27004	44312	22640	26342	32311	21978	29909	16301	14842	19892	18742	25284	21769	19359	21612	19411	17662	27733	23942
LOC105223605	0.06	0.23	0.03	0	0	0	0.03	0.27	0.17	0.27	0.15	0.36	0.16	0.32	0.16	0.04	0.12	0.09	0.16	0.21	0.33	0.04	0.23	0.15	0.32	2	7	1	0	0	0	1	7	5	9	4	12	4	7	4	1	4	3	4	6	9	1	8	5
LOC105223606	0	0	0	0	0	0	0	0	0	0	0	0	0	0	0	0	0	0	0	0	0	0	0	0	0	0	0	0	0	0	0	0	0	0	0	0	0	0	0	0	0	0	0	0	0	0	0	0	0
LOC105223607	0	0	0	0	0	0	0	0	0	0	0	0	0	0	0	0	0	0	0	0	0	0	0	0	0	0	0	0	0	0	0	0	0	0	0	0	0	0	0	0	0	0	0	0	0	0	0	0	0
LOC105223608	0	0	0	0	0	0	0.04	0	0	0	0	0	0	0	0	0	0	0.05	0	0	0.06	0	0	0.05	0.06	0	0	0	0	0	0	1	0	0	0	0	0	0	0	0	0	0	1	0	0	1	0	0	1
LOC105223609	0	0.03	0	0	0	0	0	0	0.04	0	0	0	0	0	0	0	0	0	0	0	0	0	0	0	0	0	1	0	0	0	0	0	0	1	0	0	0	0	0	0	0	0	0	0	0	0	0	0	0
LOC105223611	5.4	5.86	5.39	5.72	6.94	3.4	3.7	3.73	3.51	3.47	4.68	4.85	4.75	5.2	4.72	5.92	5.02	5.45	5.39	6.01	5.47	5.76	6.73	6.18	5.28	480	440	479	444	527	238	349	234	249	281	316	395	290	278	290	379	412	431	333	419	372	361	569	516
LOC105223612	71.46	70.88	68.41	78.08	68.42	276.08	279.84	305.28	268.13	255.77	235.12	217.54	267.59	211.97	227.52	173.44	198.79	175.54	179.52	164.86	130.77	132.81	158.21	140.42	130.17	1805	1513	1729	1724	1477	5499	7504	5454	5412	5895	4512	5039	4650	3222	3977	3159	4643	3947	3153	3267	2528	2369	3802	3337
LOC105223613	18.52	15.62	18.39	16.02	16.92	17.4	16.64	15.19	17.31	15.1	17.23	16.64	18.03	19	17.76	14.98	16.75	13.87	13.65	14.93	15.09	14.16	21.39	14.76	15.76	324	231	322	245	253	240	309	188	242	241	229	267	217	200	215	189	271	216	166	205	202	175	356	243
LOC105223614	13.74	10.7	14.07	13.59	12.4	10.37	13.94	9.83	11.21	12.16	11.75	10.92	9.87	11.93	11.5	12.08	11.46	12.12	10.44	10.78	11.56	10.68	11.67	12.15	11.19	494	325	506	427	381	294	532	250	322	399	321	360	244	258	286	313	381	388	261	304	318	271	399	411
LOC105223615	6.51	5.1	4.5	6.15	7.39	24.32	20.74	21.63	22.73	21.59	15.46	15.1	13.06	13.94	16.09	6.6	7.13	9.51	11.76	7.48	6.85	7.67	10.7	7.42	7.19	436	289	302	360	423	1285	1475	1025	1217	1320	787	928	602	562	746	319	442	567	548	393	351	363	682	468
LOC105223616	224.7	241.45	237.94	200.8	223.53	57.51	70.42	63.5	58.77	67.62	64.78	73.17	62.42	65.36	68.02	77.95	81.81	78.64	81.46	91.34	89.48	89.73	97.62	91.4	91.77	10939	9939	11592	8546	9297	2205	3633	2181	2285	3002	2398	3262	2088	1916	2288	2735	3679	3405	2758	3483	3333	3079	4516	4178
LOC105223617	7.11	7.13	7.73	8.46	6.69	15.57	13.14	13.38	15.05	14.24	17.03	16.17	20.27	18.36	15.12	15.8	15.55	16.25	13.73	17.9	16.87	17.34	17.43	15.86	19.12	219	175	236	225	173	373	404	281	359	376	392	450	422	337	317	348	440	443	292	422	393	372	488	456
LOC105223618	21.17	24.3	24.54	22.55	26.7	35.28	34.05	36.51	34.22	35.5	27.34	31.67	33.91	33.94	27.94	29.47	29.8	25.9	31.29	25.66	27.11	27.61	28.85	27.82	27.15	796	772	923	741	858	1046	1359	971	1028	1218	781	1092	877	768	727	799	1036	867	818	757	780	733	1032	984
LOC105223619	0.31	0.12	0.18	0.22	0.24	0.08	0.29	0.15	0.17	0.18	0.2	0.29	0.15	0.22	0.21	0.52	0.51	0.42	0.43	0.21	0.76	0.44	0.55	0.47	0.53	21	7	12	13	14	4	21	7	9	11	10	18	7	9	10	25	32	25	20	11	39	21	35	30
LOC105223620	1.13	2.81	2.49	2.02	2.87	9.63	9.39	9.2	8.45	8.46	7.56	7.8	8.24	6.54	7.32	7.41	6.13	7.31	7.92	4.97	5.72	5.12	5.58	4.61	5.34	28	59	62	44	61	189	248	162	168	192	143	178	141	98	126	133	141	162	137	97	109	90	132	108
LOC105223621	34.28	35.93	34.82	35.22	34.96	45.16	40.82	36.02	46.14	45.54	31.46	31.25	29.26	35.13	32.92	25.25	26.45	26.26	24.88	23.79	26.53	23.9	24.35	26.82	22.86	981	869	997	881	855	1019	1240	729	1055	1189	684	820	576	605	652	521	700	669	495	534	581	483	663	722
LOC105223622	1.85	1.68	2.61	2.25	1.96	1.16	1.77	1.54	1.47	1.84	1.43	1.09	1.02	0.67	1.68	1.34	0.7	1.12	0.72	1.39	1.42	1.12	0.67	1.44	1.21	63	48.42	89	66.88	57	31	64	37	39.95	57	37	34.11	24	13.78	39.63	33	22	34	17	37	37	27	21.54	46
LOC105223623	25.98	24.52	26.36	22.96	24.74	34.64	27.35	34.42	31.49	29.53	31.45	33.12	35.38	29.16	30.77	34.06	33.8	32.3	31.11	28.85	31.85	31.88	33.78	33.86	36.09	1591	1269	1617	1229	1297	1673	1779	1491	1541	1650	1464	1860	1492	1076	1304	1504	1914	1762	1325	1387	1493	1379	1968	1951
LOC105223624	0	0	0	0	0	0	0	0	0	0	0	0	0	0	0	0	0	0	0	0	0	0	0	0	0	0	0	0	0	0	0	0	0	0	0	0	0	0	0	0	0	0	0	0	0	0	0	0	0
LOC105223625	167.63	162.56	163.19	180.37	173.6	132.76	135.36	120.51	140.91	139.81	128.25	126.03	127.88	132.79	118.74	125.1	122.64	118.66	118.21	117.44	113.69	112.93	125.61	122.16	119.02	6237	5111	6075	5866	5520	3895	5346	3171	4189	4746	3625	4300	3273	2973	3057	3356	4219	3930	3058	3428	3237	2967	4446	4276
LOC105223626	0.05	0	0	0	0	0	0	0	0	0.54	0.06	0	0	0	0	0	0	0	0	0	0	0	0	0	0	1	0	0	0	0	0	0	0	0	10	1	0	0	0	0	0	0	0	0	0	0	0	0	0
LOC105223627	0	0	0	0	0	0	0	0	0	0	0	0	0	0	0	0	0	0	0	0	0	0	0	0	0	0	0	0	0	0	0	0	0	0	0	0	0	0	0	0	0	0	0	0	0	0	0	0	0
LOC105223628	0	0	0	0	0	0.02	0.03	0.07	0.02	0.06	0	0.02	0.21	0.03	0.03	0.02	0.06	0.12	0	0.09	0.18	0.02	0.04	0.02	0.18	0	0	0	0	0	1	2	3	1	3	0	1	8	1	1	1	3	6	0	4	8	1	2	1
LOC105223629	0.28	0.7	0.28	1.19	0.39	60.96	56.17	50.49	48.88	43.62	9.87	10.3	11.13	11.38	9.5	3.08	4.02	5.97	7.64	3.86	4.84	4.96	9.19	5.61	3.76	14	30	14	53	17	2442	3029	1814	1984	2022	381	480	389	348	334	113	189	270	270	154	188	178	444	268
LOC105223631	0	0	0	0.07	0.03	0	0	0.04	0	0	0	0.13	0	0	0	0	0	0	0	0	0	0.04	0	0	0	0	0	0	2	1	0	0	1	0	0	0	4	0	0	0	0	0	0	0	0	0	1	0	0
LOC105223632	0	0	0	0	0	0	0	0	0	0	0	0.03	0	0.09	0	0	0	0	0	0	0.04	0	0.03	0.03	0.04	0	0	0	0	0	0	0	0	0	0	0	1	0	2	0	0	0	0	0	0	1	0	1	1
LOC105223633	0	0	0	0.03	0	0.06	0	0	0	0.02	0	0.02	0	0	0	0	0	0	0	0	0	0	0.02	0	0	0	0	0	1	0	2	0	0	0	1	0	1	0	0	0	0	0	0	0	0	0	0	1	0
LOC105223634	0	0	0	0	0	0	0	0.02	0	0.09	0	0	0	0	0	0.02	0.01	0.03	0	0	0	0	0	0	0.03	0	0	0	0	0	0	0	1	0	7	0	0	0	0	0	1	1	2	0	0	0	0	0	0
LOC105223635	9.42	7.35	7.23	6.58	6.69	2.75	3.98	3.78	3.27	3.67	5.97	5.48	5.09	4.3	5.55	6.57	7.27	6.59	7.69	8.94	9.45	10.21	8.1	9.51	9.32	295.7	193.63	226.24	180.27	179.22	68.37	132.59	83.76	81.73	104.66	141.2	157.45	109.65	81	119.6	148.61	211.61	184	167.86	218.67	227.16	224.6	241.63	279.67
LOC105223636	0	0	0	0	0	0	0	0	0	0	0	0	0	0	0	0	0	0	0	0	0	0	0	0	0	0	0	0	0	0	0	0	0	0	0	0	0	0	0	0	0	0	0	0	0	0	0	0	0
LOC105223637	0.47	0.64	0.49	1	0.67	0.56	0.49	0.73	0.16	0.62	0.85	0.59	0.56	0.47	0.52	0.97	0.56	0.81	0.78	0.79	0.88	0.8	0.95	0.85	0.69	18	21	19	34	22	17	20	20	5	22	25	21	15	11	14	27	20	28	21	24	26	22	35	31
LOC105223638	0.18	0.14	0.06	0.07	0.14	0.04	0.03	0	0	0.07	0.12	0	0.04	0.1	0	0.08	0.06	0.1	0.09	0.08	0	0.04	0.19	0	0.08	6	4	2	2	4	1	1	0	0	2	3	0	1	2	0	2	2	3	2	2	0	1	6	0
LOC105223640	0	0	0	0	0	0	0	0	0	0	0	0	0	0	0	0	0	0	0	0	0	0	0	0	0	0	0	0	0	0	0	0	0	0	0	0	0	0	0	0	0	0	0	0	0	0	0	0	0
LOC105223641	0	0.03	0.07	0.13	0.05	0.72	0.32	0.55	0.14	0.48	0.15	0.05	0.1	0.15	0.1	0.16	0.02	0.1	0.16	0.15	0.09	0.06	0.17	0.15	0.14	0	1	3	5	2	25	15	17	5	19	5	2	3	4	3	5	1	4	5	5	3	2	7	6
LOC105223642	1.75	1.28	1.96	1.12	1.35	1.15	1.74	0.74	0.79	1.19	0.37	0.91	0.56	0.17	0.5	1.16	0.83	1.41	1.06	1.38	1.19	1.48	0.81	1.19	1.28	50	31	56	28	33	26	53	15	18	31	8	24	11	3	10	24	22	36	21	31	26	30	22	32
LOC105223643	35.19	31.15	33.62	30	32.4	45.25	44.26	40.8	43.68	44.87	37.73	37.85	37.13	36.29	35.36	30.96	34.37	37.35	34.49	37.28	32.61	38.52	33.41	37.51	34.66	361	270	345	269	284	366	482	296	358	420	294	356	262	224	251	229	326	341	246	300	256	279	326	362
LOC105223644	10.66	11.33	11.12	11.53	11.01	11.02	11.79	13	12.45	12.66	12.66	11.72	10.93	12.49	9.1	12.35	12.49	10.52	11.96	11.77	13.28	12.55	11.7	11.92	12.32	254	228	265	240	224	207	298	219	237	275	229	256	179	179	150	212	275	223	198	220	242	211	265	267
LOC105223645	71.55	66.85	68.58	72.2	69.47	39.86	41.79	36.21	30.94	27.92	32.06	31.94	30.62	26.9	26.96	41.52	44.22	39.94	46.31	46.15	41.71	39.72	45.8	40.01	46.83	2225	1748	2130	1966	1849	970	1384	798	764	793	761	910	658	501	580	930	1261	1097	996	1125	992	868	1353	1162
LOC105223646	40.95	33.93	36.8	31.81	35.54	73.94	82	72.4	70.23	68.24	42.45	43.36	48.35	36.54	48.92	50.94	74.06	60.08	61.68	63.03	64.72	61.27	53.93	54.43	59.5	4191	2943	3775	2840	3117	5985	9006	5287	5800	6463	3309	4073	3401	2242	3457	3743	7008	5479	4413	5049	5079	4404	5266	5247
LOC105223647	1.44	1.88	1.54	1.94	1.56	2.83	2.29	2.23	2.74	3.45	2.29	2.55	2.79	2.84	2.45	2.41	2.19	2.48	2.29	2.68	2.7	2.76	2.54	2.6	3.04	96	106	103	113	89	149	162	105	146	210	116	156	128	114	113	116	135	147	106	140	138	130	161	163
LOC105223648	1.03	0.59	0.26	0.97	0.6	0.34	0.5	0.31	0.42	0.26	0.25	0.55	0.28	0.24	0.25	0.3	0.48	0.26	0.46	0.55	0.37	0.4	0.68	0.54	0.55	114	55	29	94	57	30	58	24	37	26	21	56	21	16	19	24	49	26	35	48	31	31	71	56
LOC105223649	12.02	9.26	7.13	10.06	9.63	17.14	15.75	15.15	18.12	19.47	10.16	9.15	8.74	8.88	8.88	7.23	6.24	9.48	7.8	7.76	6	8.32	6.52	6.96	7.98	450	293	267	329	308	506	626	401	542	665	289	314	225	200	230	195	216	316	203	228	172	220	232	245
LOC105223650	0.07	0	0.07	0.8	0.16	0.27	0	0.2	0.09	0.31	0.74	0.77	0.92	0.7	1.01	1.07	0.68	68.89	1.21	0.8	506.74	22.26	125.68	0.75	0.62	1	0	1	10	2	3	0	2	1	4	8	10	9	6	10	11	9	874	12	9	5527	224	1704	10
LOC105223651	0.06	0.07	0.03	0.07	0.07	0.11	0.03	0.13	0.04	0.29	0.16	0	0	0.1	0.09	0.08	0.16	0.07	0	0.04	0.12	0.17	0.03	0.06	0.04	2	2	1	2	2	3	1	3	1	9	4	0	0	2	2	2	5	2	0	1	3	4	1	2
LOC105223652	0	0	0	0	0	0	0	0	0	0	0	0	0	0	0	0	0	0	0	0	0	0	0	0	0.12	0	0	0	0	0	0	0	0	0	0	0	0	0	0	0	0	0	0	0	0	0	0	0	0
LOC105223653	2.58	2.46	2.66	2.38	3.24	2.26	2.59	2.23	2.14	2.9	2.98	2.47	2.87	2.73	2.48	3.07	2.85	3.32	2.46	3.46	3.71	3.55	4.17	3.46	3.02	149	120	154	120	160	103	159	91	99	153	131	131	114	95	99	128	152	171	99	157	164	145	229	188
LOC105223654	12.6	11.77	11.85	12.5	12.85	10.18	15.04	9.22	9.5	8.99	9.31	11.48	7.77	7.88	10.58	20.17	20.96	18.17	18.94	22.96	22.68	23.64	21.91	25.31	22.41	1529	1205	1440	1328	1332	977	1950	793	925	999	861	1279	652	580	890	1774	2364	1971	1604	2189	2115	2032	2540	2901
LOC105223655	11.5	11.6	11.08	17.74	13.11	19.81	28.65	29.1	20.75	15.13	15.69	13.32	12.68	13.26	13.51	15.37	17.61	15.91	13.19	11.2	10.74	9.9	12	14.48	10.89	385	328	371	519	375	523	1018	689	555	462	399	409	292	267	313	371	545	474	307	294	275	234	382	456
LOC105223657	5.01	5.21	4.3	5.26	5.58	4.62	3.55	2.98	3.96	3.43	2.89	2.32	1.46	2.15	2.05	1.41	1.68	1.71	1.29	1.17	1.31	0.73	1.94	1.41	1.33	290	255	249	266	276	211	218	122	183	181	127	123	58	75	82	59	90	88	52	53	58	30	107	77
LOC105223658	9.49	7.78	8.15	8.8	9.24	4.2	6.73	5.05	4.99	5.31	6.59	6.4	4.69	4.81	7.81	8.74	8.91	9.54	8.9	10.68	14.03	9.81	10.39	10.53	17.66	552	383	475	446	458	193	416	207	232	282	292	341	188	168	315	366	480	494	360	488	626	404	574	577
LOC105223659	58.68	54.33	45.31	52.01	59	42.6	58.01	29.99	39.46	42.33	57.63	51.75	36.84	40.93	61.96	113.66	94	109.81	128.16	114.74	166.83	196.78	160.84	177.59	172.46	910	712	703	705	782	521	955	329	489	599	679	736	393	382	665	1271	1348	1516	1382	1396	1980	2155	2373	2591
LOC105223660	17.36	16.18	14.74	12.65	14.4	11.69	13.55	10	13.69	14.14	16.2	14.78	13.31	13.63	16.15	16.9	15.82	18.57	16.16	14.55	21.28	24.08	19.56	18.64	18.95	292	230	248	186	207	155	242	119	184	217	207	228	154	138	188	205	246	278	189	192	274	286	313	295
LOC105223661	8	8.69	6.54	6.35	7.37	5.96	6.17	6.15	8.82	7.78	6.97	8.94	7.92	6.23	8.09	6.72	7.73	7.92	6.9	6.69	8.42	7.29	8.56	7.38	8.09	160	147	131	111	126	94	131	87	141	142	106	164	109	75	112	97	143	141	96	105	129	103	163	139
LOC105223663	3.62	4.2	2.77	3.49	2.74	3.06	4.82	3.61	3.64	3.04	3.36	3.64	3.82	3.89	5.13	4.43	5.15	3.83	3.78	4.71	3.9	3.42	4.48	5.06	4.04	51	50	39	43	33	34	72	36	41	39	36	47	37	33	50	45	67	48	37	52	42	34	60	67
LOC105223664	0	0	0	0.25	0	0	0.03	0	0	0.1	0	0	0	0	0	0	0.1	0.04	0	0	0.04	0	0.07	0	0	0	0	0	7	0	0	1	0	0	3	0	0	0	0	0	0	3	1	0	0	1	0	2	0
LOC105223665	0.96	0.86	0.46	1.36	0.39	1.38	1.12	0.79	1.73	1.12	1.82	0.86	0.58	1.1	1.14	0.78	0.32	1.41	1.09	0.84	0.73	0.75	0.35	0.67	0.92	29	22	14	36	10	33	36	17	42	31	42	24	12	20	24	17	9	38	23	20	17	16	10	19
LOC105223666	5.11	6.26	4.98	6.7	4.48	2.8	1.96	2.4	3.34	3.35	3.04	2.24	1.34	2.14	1.67	3.88	1.39	1.91	2.33	0.82	1.41	1.6	2.16	1.37	1.89	199	206	194	228	149	86	81	66	104	119	90	80	36	50	45	109	50	66	63	25	42	44	80	50
LOC105223667	0.01	0.04	0.04	0.04	0	0.26	0.4	0.2	0.41	0.27	0.48	0.5	0.22	0.18	0.33	0.63	0.58	0.63	0.59	0.75	0.65	0.46	1.06	0.77	1.16	1	5	6	5	0	30	63	21	48	36	54	67	22	16	34	67	79	83	60	86	73	48	149	106
LOC105223668	9.16	8.12	8.83	12.85	9.9	7.82	5.63	4.53	5.24	6.73	287.12	274.36	299.73	236.52	290.4	439.1	565.39	442.18	460.72	483.62	389.23	444.85	404.31	382.3	374.02	446	334	430	547	412	300	291	156	204	299	10619	12248	10038	6929	9783	15413	25450	19162	15595	18471	14501	15293	18725	17509
LOC105223670	3.64	3.93	3.38	4.35	3.78	2.37	3.23	2.37	2.6	2.88	3.21	3.72	2.48	3.09	3.59	5.4	6.27	5.34	5.47	6.56	7.72	7.07	7.7	6.63	8.01	239	218	222	250	212	123	225	110	134	168	159	224	111	122	163	256	381	311	250	338	388	328	481	410
LOC105223671	0.98	0.47	0.74	0.84	0.29	5.17	3.06	1.95	2.95	3.34	6.47	6.27	8.79	7.84	6.89	7.02	9.14	4.8	3.53	5.89	6.87	5.22	5.58	6.16	7.52	20	8	15	15	5	83	66	28	48	62	100	117	123	96	97	103	172	87	50	94	107	75	108	118
LOC105223672	714.18	447.99	453.12	545.88	406.69	126.89	91.58	119.5	175.13	320.8	116.77	142.66	64.61	153.26	187.88	106.62	32.14	102.36	70.04	142.62	188.5	146.14	109.25	138.46	101.47	11585	6141	7354	7740	5638	1623	1577	1371	2270	4748	1439	2122	721	1496	2109	1247	482	1478	790	1815	2340	1674	1686	2113
LOC105223673	0.06	0.2	0.06	0.26	0.07	0.07	0	0.08	0.07	0.12	0.15	0.06	0.08	0	0.16	0	0	0.19	0	0	0	0	0.12	0	0	1	3	1	4	1	1	0	1	1	2	2	1	1	0	2	0	0	3	0	0	0	0	2	0
LOC105223674	0	0	0	0.07	0	0	0	0	0	0	0	0	0	0	0	0	0	0	0	0	0	0	0	0	0	0	0	0	1	0	0	0	0	0	0	0	0	0	0	0	0	0	0	0	0	0	0	0	0
[truncated: 11,307 more rows]
[truncated: 10 more columns]
