# Supplementary material for: Protein feeding mediates sex pheromone biosynthesis in an insect
Source: eLife. 2023 Jan 19;12:e83469. doi: 10.7554/eLife.83469 (PMC9908074; doi:10.7554/eLife.83469)
Supplement: Supplementary file 7. [file elife-83469-supp7.xlsx]

## Sheet: 0d vs 3d
id	Rect-0d-1_count	Rect-0d-2_count	Rect-0d-3_count	Rect-0d-4_count	Rect-0d-5_count	Rect-3d-1_count	Rect-3d-2_count	Rect-3d-3_count	Rect-3d-4_count	Rect-3d-5_count	Rect-0d-1_fpkm	Rect-0d-2_fpkm	Rect-0d-3_fpkm	Rect-0d-4_fpkm	Rect-0d-5_fpkm	Rect-3d-1_fpkm	Rect-3d-2_fpkm	Rect-3d-3_fpkm	Rect-3d-4_fpkm	Rect-3d-5_fpkm	Rect-0d_mean	Rect-3d_mean	log2(fc)	PValue	FDR	Symbol	Description	KEGG_A_class	KEGG_B_class	Pathway	K_ID	GO Component	GO Function	GO Process
LOC105222598	80	60	52	64	69	15671	25026	14668	14113	15746	4.48	3.98	2.93	4.12	4.56	1114.34	1321.89	1162.9	990.37	967.68	4.014	1111.44	8.11317	0	0	Cyp6g1	PREDICTED: cytochrome P450 6g1-like [Bactrocera dorsalis]	-	-	-	-	-	GO:0016491//oxidoreductase activity;GO:0046906//tetrapyrrole binding	GO:0044710//single-organism metabolic process
LOC105222672	525	537	628	464	463	3127	4579	2846	3280	3439	14.31	17.32	17.11	14.47	14.77	108.11	117.6	109.7	111.91	102.75	15.596	110.014	2.81844	0	0	BDH1	PREDICTED: D-beta-hydroxybutyrate dehydrogenase, mitochondrial [Bactrocera dorsalis]	-	-	-	-	-	GO:0003824//catalytic activity	GO:0044710//single-organism metabolic process
LOC105222977	23608	20110	23828	21920	19748	2701	3190	2254	2065	2799	479.95	483.79	484.16	509.82	469.76	69.64	61.09	64.79	52.54	62.37	485.496	62.086	-2.96712	0	0	-	-	-	-	-	-	-	-	-
LOC105223844	634	555	631	496	623	10741	15596	10302	10017	10004	12.86	13.32	12.79	11.51	14.79	276.29	298	295.45	254.28	222.39	13.054	269.282	4.36655	0	0	Soat1	PREDICTED: sterol O-acyltransferase 1 [Bactrocera dorsalis]	Organismal Systems;Metabolism	Digestive system;Lipid metabolism	ko04979//Cholesterol metabolism;ko00100//Steroid biosynthesis	K00637;K00637	GO:0031090//organelle membrane;GO:0031224//intrinsic component of membrane;GO:0043231//intracellular membrane-bounded organelle	GO:0016747//transferase activity, transferring acyl groups other than amino-acyl groups	-
LOC105224421	48852	41461	50237	43615	40384	126666	166400	113608	124333	143702	1012.45	1016.82	1040.6	1034.12	979.31	3329.16	3248.64	3329.1	3224.82	3264.08	1016.66	3279.16	1.68949	0	0	--	PREDICTED: myb-like protein Q isoform X2 [Bactrocera latifrons]	-	-	-	-	-	-	-
LOC105224810	4356	3584	3897	3694	3476	13187	21719	11893	14076	16170	123.23	119.98	110.18	119.55	115.06	473.1	578.78	475.7	498.34	501.34	117.6	505.452	2.10369	0	0	Idh1	PREDICTED: isocitrate dehydrogenase [NADP] cytoplasmic [Bactrocera dorsalis]	Metabolism;Metabolism;Cellular Processes;Metabolism;Metabolism;Metabolism;Human Diseases;Metabolism	Global and overview maps;Global and overview maps;Transport and catabolism;Metabolism of other amino acids;Global and overview maps;Carbohydrate metabolism;Cancers;Global and overview maps	ko01100//Metabolic pathways;ko01200//Carbon metabolism;ko04146//Peroxisome;ko00480//Glutathione metabolism;ko01230//Biosynthesis of amino acids;ko00020//Citrate cycle (TCA cycle);ko05230//Central carbon metabolism in cancer;ko01210//2-Oxocarboxylic acid metabolism	K00031;K00031;K00031;K00031;K00031;K00031;K00031;K00031	-	-	-
LOC105224825	3737	2677	3195	2979	2498	39	32	35	25	60	293.92	249.15	251.16	268.05	229.89	3.89	2.37	3.89	2.46	5.17	258.434	3.556	-6.1834	0	0	--	PREDICTED: cuticle protein 19-like [Bactrocera oleae]	-	-	-	-	-	-	-
LOC105225862	3548	2952	3282	3249	2971	717	1040	642	760	894	88.53	87.17	81.85	92.75	86.75	22.69	24.45	22.65	23.73	24.45	87.41	23.594	-1.88938	0	0	pit	PREDICTED: probable ATP-dependent RNA helicase pitchoune [Bactrocera dorsalis]	-	-	-	-	-	GO:0003676//nucleic acid binding;GO:0017111//nucleoside-triphosphatase activity;GO:0032550//purine ribonucleoside binding	-
LOC105226345	5746	5137	6650	6344	5037	22	31	35	35	39	144.74	153.12	167.42	182.82	148.46	0.7	0.74	1.25	1.1	1.08	159.312	0.974	-7.35372	0	0	CHIA	Endochitinase, partial [Bactrocera dorsalis]	Metabolism;Metabolism	Global and overview maps;Carbohydrate metabolism	ko01100//Metabolic pathways;ko00520//Amino sugar and nucleotide sugar metabolism	K01183;K01183	-	GO:0004553//hydrolase activity, hydrolyzing O-glycosyl compounds;GO:0097367//carbohydrate derivative binding	GO:0006026//aminoglycan catabolic process;GO:0044238//primary metabolic process
LOC105226547	27	13	18	39	33	1838	2660	1985	1977	2242	0.8	0.45	0.53	1.32	1.14	68.94	74.11	83.01	73.18	72.67	0.848	74.382	6.45475	0	0	to	PREDICTED: protein takeout [Bactrocera dorsalis]	-	-	-	-	-	-	-
LOC105226601	149	144	110	199	157	33674	44345	27925	25261	26107	7.11	8.13	5.25	10.87	8.77	2038.71	1994.25	1884.94	1509.23	1365.97	8.026	1758.62	7.77555	0	0	to	PREDICTED: protein takeout-like [Bactrocera dorsalis]	-	-	-	-	-	-	-
LOC105227474	817	676	771	679	688	5381	6634	5222	5481	6200	21.59	21.14	20.36	20.53	21.27	180.33	165.14	195.11	181.26	179.56	20.978	180.28	3.10329	0	0	Cyp6a2	PREDICTED: cytochrome P450 6a2-like [Bactrocera dorsalis]	-	-	-	-	-	GO:0016491//oxidoreductase activity;GO:0046872//metal ion binding	-
LOC105230191	1571	1372	1808	1433	1344	5855	7871	5376	6247	6706	63.02	65.05	72.46	65.68	63	297.48	297.16	304.6	313.3	294.73	65.842	301.454	2.19486	0	0	Slc25a3	PREDICTED: phosphate carrier protein, mitochondrial [Bactrocera dorsalis]	-	-	-	-	GO:0031224//intrinsic component of membrane	-	-
LOC105230878	22	10	8	10	10	4006	6906	4474	4810	4415	0.91	0.49	0.33	0.47	0.48	210.17	269.13	261.7	249.03	200.18	0.536	238.042	8.79477	0	0	--	PREDICTED: alpha-tocopherol transfer protein-like [Bactrocera dorsalis]	-	-	-	-	GO:0044464//cell part	-	GO:0051234//establishment of localization
LOC105231023	485	438	568	543	523	59169	71579	47764	51086	54880	10.38	10.96	12.19	13.4	12.85	1571.32	1418.49	1424.66	1342.62	1262.04	11.956	1403.83	6.87549	0	0	Elovl7	PREDICTED: elongation of very long chain fatty acids protein 7 [Bactrocera dorsalis]	-	-	-	-	GO:0031224//intrinsic component of membrane	GO:0003824//catalytic activity	GO:0006631//fatty acid metabolic process
LOC105231537	61	64	62	27	50	11317	18808	10765	10952	11909	1.95	2.42	1.98	0.98	1.87	458.3	565.73	486.03	437.66	416.76	1.84	472.896	8.00567	0	0	Cyp6g1	PREDICTED: LOW QUALITY PROTEIN: cytochrome P450 6g1-like [Bactrocera dorsalis]	-	-	-	-	-	GO:0016491//oxidoreductase activity;GO:0046906//tetrapyrrole binding	GO:0044710//single-organism metabolic process
LOC105231787	2306	1732	1897	1804	1797	137510	180923	134704	127975	143918	57.76	51.4	47.36	51.87	52.62	4283.78	4190.53	4800.02	3845.52	3919.45	52.202	4207.86	6.33284	0	0	D11DS	PREDICTED: acyl-CoA Delta(11) desaturase isoform X2 [Bactrocera dorsalis]	Organismal Systems;Environmental Information Processing;Metabolism;Organismal Systems;Metabolism	Aging;Signal transduction;Global and overview maps;Endocrine system;Lipid metabolism	ko04212//Longevity regulating pathway - worm;ko04152//AMPK signaling pathway;ko01212//Fatty acid metabolism;ko03320//PPAR signaling pathway;ko01040//Biosynthesis of unsaturated fatty acids	K00507;K00507;K00507;K00507;K00507	GO:0031224//intrinsic component of membrane	GO:0016705//oxidoreductase activity, acting on paired donors, with incorporation or reduction of molecular oxygen	GO:0006631//fatty acid metabolic process
LOC105231832	90	84	99	113	66	2651	2910	2040	2203	2187	3.46	3.82	3.8	4.97	2.97	129.16	105.32	110.81	105.92	92.09	3.804	108.66	4.83616	0	0	--	PREDICTED: transmembrane protein 135-like [Ceratitis capitata]	-	-	-	-	-	-	-
LOC105232427	1266	1127	1170	1277	1144	19345	21865	17002	20430	22574	52.41	55.21	48.41	60.49	55.42	1015.71	852.75	995.27	1058.55	1024.31	54.388	989.318	4.18507	0	0	--	Circadian clock-controlled protein [Bactrocera dorsalis]	-	-	-	-	-	-	-
LOC105232601	792	670	790	687	701	2946	4059	2829	3117	3431	26.44	26.51	26.6	26.33	27.27	121.73	125.77	131.07	127.37	121.55	26.63	125.498	2.23654	0	0	CG1969	PREDICTED: probable glucosamine 6-phosphate N-acetyltransferase isoform X1 [Bactrocera cucurbitae]	Metabolism	Carbohydrate metabolism	ko00520//Amino sugar and nucleotide sugar metabolism	K00621	-	-	-
LOC105232635	26037	23236	27231	23617	22283	87844	121872	77209	85636	94291	760.08	803.08	794.02	793.22	760.73	3397.3	3500.46	3327.2	3274.3	3150.85	782.226	3330.02	2.08987	0	0	Argk	PREDICTED: arginine kinase isoform X1 [Bactrocera dorsalis]	Metabolism;Metabolism	Global and overview maps;Amino acid metabolism	ko01100//Metabolic pathways;ko00330//Arginine and proline metabolism	K00933;K00933	-	GO:0016772//transferase activity, transferring phosphorus-containing groups	-
LOC105233219	12	11	16	18	13	2135	3032	2214	2279	2143	0.3	0.33	0.4	0.52	0.38	68.43	72.18	79.11	72.08	59.36	0.386	70.232	7.50738	0	0	-	-	-	-	-	-	-	-	-
LOC105233745	1818	1580	1902	1858	1970	21988	36349	23525	33280	38115	11.78	12.11	12.31	13.77	14.93	180.63	221.81	215.47	269.8	270.6	12.98	231.662	4.15766	0	0	-	-	-	-	-	-	-	-	-
LOC105229244	5374	4315	5236	4226	4465	486	847	440	605	740	157.2	149.36	153.08	141.42	152.82	18.03	23.34	18.2	22.15	23.72	150.776	21.088	-2.83791	1.37444e-298	6.319e-296	La	PREDICTED: la protein homolog [Bactrocera dorsalis]	-	-	-	-	GO:0032991//macromolecular complex;GO:0043231//intracellular membrane-bounded organelle	GO:0003676//nucleic acid binding	GO:0010467//gene expression
LOC105233281	212	174	180	139	201	7105	13244	9624	10197	7138	23.41	22.73	19.86	17.56	25.97	994.79	1377.4	1502.33	1408.91	863.71	21.906	1229.43	5.81052	5.84992e-296	2.58192e-293	--	PREDICTED: histidine-rich glycoprotein-like [Bactrocera latifrons]	-	-	-	-	-	-	-
LOC105231525	2287	1874	2269	1990	1918	419	589	346	474	507	67.68	65.62	67.11	67.37	66.41	15.72	16.42	14.48	17.55	16.44	66.838	16.122	-2.05164	4.35415e-292	1.84783e-289	r-l	PREDICTED: uridine 5'-monophosphate synthase [Bactrocera dorsalis]	Metabolism;Metabolism;Metabolism	Global and overview maps;Xenobiotics biodegradation and metabolism;Nucleotide metabolism	ko01100//Metabolic pathways;ko00983//Drug metabolism - other enzymes;ko00240//Pyrimidine metabolism	K13421;K13421;K13421	-	GO:0016763//transferase activity, transferring pentosyl groups;GO:0016831//carboxy-lyase activity	GO:0006222//UMP biosynthetic process;GO:0019856//pyrimidine nucleobase biosynthetic process
LOC105233360	5561	4452	4962	4671	4302	884	1345	891	1055	1145	153.41	145.33	136.81	147.42	138.86	30.93	34.95	34.75	36.42	34.62	144.366	34.334	-2.07202	8.63528e-291	3.52895e-288	NOP58	PREDICTED: nucleolar protein 58 [Bactrocera dorsalis]	Genetic Information Processing	Translation	ko03008//Ribosome biogenesis in eukaryotes	K14565	-	-	-
LOC105232633	5298	4100	4477	4165	4289	491	788	446	587	756	111.28	101.6	93.89	99.78	105.2	12.95	15.61	13.19	15.34	17.43	102.35	14.904	-2.77974	2.78624e-284	1.09798e-281	--	PREDICTED: nucleolin 1 isoform X1 [Bactrocera dorsalis]	Human Diseases	Infectious diseases	ko05130//Pathogenic Escherichia coli infection	K11294	GO:0043232//intracellular non-membrane-bounded organelle	-	GO:0030154//cell differentiation
LOC105222405	1001	737	838	892	738	3425	4991	3409	3629	4030	19.39	16.92	16.24	19.83	16.67	84.35	91.21	93.56	88.03	85.88	17.81	88.606	2.31472	3.40871e-265	1.29696e-262	Slc16a10	PREDICTED: monocarboxylate transporter 9 [Bactrocera dorsalis]	-	-	-	-	-	-	-
LOC105224023	174	123	113	128	108	1534	2267	1257	1975	1782	4.96	4.32	3.35	4.23	3.75	55.8	61.88	51.43	70.85	56.48	4.122	59.288	3.84632	1.97731e-259	7.27253e-257	CLN3	PREDICTED: battenin-like [Bactrocera dorsalis]	Cellular Processes	Transport and catabolism	ko04142//Lysosome	K12389	GO:0031224//intrinsic component of membrane	-	-
LOC105233895	192	205	132	211	195	4204	6360	5117	4724	5083	17.65	22.3	12.13	22.19	20.98	490.17	550.83	665.19	543.55	512.19	19.05	552.386	4.85781	2.65998e-255	9.46782e-253	--	PREDICTED: glycine-rich cell wall structural protein-like [Bactrocera dorsalis]	-	-	-	-	-	-	-
LOC105227284	1373	1079	1225	1163	1096	162	254	144	195	197	77.23	71.82	68.87	74.84	72.14	11.56	13.46	11.45	13.73	12.14	72.98	12.468	-2.54927	7.21499e-250	2.48782e-247	MRTO4	PREDICTED: mRNA turnover protein 4 homolog [Bactrocera dorsalis]	-	-	-	-	GO:0030529//intracellular ribonucleoprotein complex	-	GO:0022613//ribonucleoprotein complex biogenesis
LOC105230418	348	270	244	274	217	4198	6774	3110	5476	4250	31.24	28.68	21.89	28.14	22.79	477.94	572.86	394.76	615.23	418.16	26.548	495.79	4.22305	6.71514e-247	2.2453e-244	--	PREDICTED: venom peptide HsVx1-like [Ceratitis capitata]	-	-	-	-	-	-	-
LOC105227222	104	94	99	106	86	1121	1254	866	986	1021	12.6	13.48	11.99	14.7	12.2	172.29	143.16	148.4	149.55	135.62	12.994	149.804	3.52716	5.93158e-243	1.92497e-240	--	-	-	-	-	-	-	-	-
LOC105224199	1745	1383	1467	1399	1299	194	307	169	186	257	23.42	21.97	19.68	21.48	20.4	3.3	3.88	3.21	3.12	3.78	21.39	3.458	-2.62893	1.86472e-234	5.87865e-232	--	PREDICTED: WD repeat-containing protein 75 [Bactrocera dorsalis]	Genetic Information Processing	Translation	ko03008//Ribosome biogenesis in eukaryotes	K14552	-	-	-
LOC105227078	371	273	318	377	317	3515	4243	2598	3733	3022	9.36	8.15	8.02	10.88	9.36	112.44	100.82	92.66	117.85	83.55	9.154	101.464	3.47042	5.16443e-230	1.5829e-227	Orct	PREDICTED: organic cation transporter protein [Bactrocera dorsalis]	-	-	-	-	GO:0031224//intrinsic component of membrane	GO:0005215//transporter activity	GO:0044763//single-organism cellular process
LOC105226634	270	271	334	280	296	1336	2142	1224	1451	1637	3.64	4.33	4.51	4.32	4.68	22.87	27.24	23.36	24.51	24.22	4.296	24.44	2.50818	1.48678e-229	4.43382e-227	-	-	-	-	-	-	-	-	-
LOC105223395	1755	1490	1695	1583	1382	6328	10161	6828	6544	7406	63.79	64.93	61.78	65.96	58.51	293.22	349.02	350.95	298.54	296.95	62.994	317.736	2.33454	4.1315e-229	1.19966e-226	Ttpal	PREDICTED: alpha-tocopherol transfer protein-like isoform X1 [Bactrocera dorsalis]	-	-	-	-	GO:0044464//cell part	-	GO:0051234//establishment of localization
LOC105233083	397	283	233	314	293	3432	4881	2617	2961	3345	19.04	16.06	11.17	17.23	16.44	208.72	220.49	177.44	177.7	175.8	15.988	192.03	3.58627	2.13978e-226	6.05392e-224	ADH	PREDICTED: alcohol dehydrogenase [Bactrocera dorsalis]	-	-	-	-	-	GO:0003824//catalytic activity	GO:0044281//small molecule metabolic process
LOC105228171	4086	3512	4003	3820	3287	773	949	610	749	977	121.06	123.11	118.54	129.46	113.96	29.04	26.47	25.55	27.77	31.72	121.226	28.11	-2.10854	1.73608e-223	4.78898e-221	Fib	PREDICTED: rRNA 2'-O-methyltransferase fibrillarin [Bactrocera dorsalis]	Genetic Information Processing	Translation	ko03008//Ribosome biogenesis in eukaryotes	K14563	GO:0016604//nuclear body;GO:0030529//intracellular ribonucleoprotein complex;GO:0044452//nucleolar part	GO:0003676//nucleic acid binding;GO:0016741//transferase activity, transferring one-carbon groups	GO:0006399//tRNA metabolic process;GO:0010467//gene expression;GO:0016072//rRNA metabolic process;GO:0031023//microtubule organizing center organization;GO:0033554//cellular response to stress
LOC105231159	3045	2553	2885	2964	2559	553	698	476	601	610	94.18	93.44	89.19	104.89	92.62	21.69	20.34	20.82	23.26	20.68	94.864	21.358	-2.15108	2.34944e-222	6.32285e-220	DDX47	PREDICTED: probable ATP-dependent RNA helicase DDX47 [Bactrocera dorsalis]	-	-	-	-	-	GO:0017111//nucleoside-triphosphatase activity;GO:0032550//purine ribonucleoside binding	-
LOC105223913	4835	4102	4837	4587	4185	1148	1752	1082	1144	1358	123.66	124.15	123.64	134.21	125.24	37.23	42.21	39.13	36.62	38.07	126.18	38.652	-1.70687	7.82243e-222	2.05507e-219	STIP1	PREDICTED: stress-induced-phosphoprotein 1 [Bactrocera dorsalis]	Human Diseases	Neurodegenerative diseases	ko05020//Prion diseases	K09553	-	-	-
LOC105228282	3568	2947	3370	3423	3079	12166	15530	11864	12507	13282	89.2	87.18	84.21	97.9	90.07	385.74	365.77	419.39	391.36	363.94	89.712	385.24	2.10238	1.62327e-221	4.1654e-219	Mfe2	PREDICTED: peroxisomal multifunctional enzyme type 2 [Bactrocera dorsalis]	Metabolism;Cellular Processes;Metabolism	Global and overview maps;Transport and catabolism;Lipid metabolism	ko01100//Metabolic pathways;ko04146//Peroxisome;ko00120//Primary bile acid biosynthesis	K12405;K12405;K12405	GO:0042579//microbody	GO:0016836//hydro-lyase activity;GO:0046983//protein dimerization activity	GO:0006635//fatty acid beta-oxidation
LOC105230317	304	239	324	248	244	1072	1421	923	1026	1154	7.05	6.56	7.51	6.58	6.62	31.52	31.04	30.26	29.77	29.32	6.864	30.382	2.1461	5.85529e-215	1.46835e-212	B1	PREDICTED: esterase B1 [Bactrocera dorsalis]	-	-	-	-	-	-	-
LOC105221851	25	14	11	12	11	1049	1167	781	788	1002	1.16	0.77	0.51	0.64	0.6	61.85	51.11	51.34	45.85	51.06	0.736	52.242	6.14936	6.15369e-213	1.50888e-210	--	GL24363 [Drosophila persimilis]	-	-	-	-	-	-	-
LOC105232703	3003	2702	3061	2720	2632	6575	8591	5162	6034	7551	11.23	11.95	11.44	11.63	11.51	31.17	30.25	27.28	28.22	30.93	11.552	29.57	1.35599	1.42284e-212	3.41295e-210	Dhc64C	PREDICTED: dynein heavy chain, cytoplasmic isoform X6 [Bactrocera dorsalis]	Cellular Processes;Human Diseases;Organismal Systems	Transport and catabolism;Infectious diseases;Excretory system	ko04145//Phagosome;ko05132//Salmonella infection;ko04962//Vasopressin-regulated water reabsorption	K10413;K10413;K10413	-	-	-
LOC105223807	105	83	97	112	88	880	1199	623	802	838	1.83	1.71	1.69	2.23	1.79	19.42	19.66	15.33	17.47	15.98	1.85	17.572	3.24768	2.51422e-205	5.90254e-203	-	-	-	-	-	-	-	-	-
LOC105229153	3478	3064	3663	3957	3587	508	658	426	520	595	100.62	102.24	104.36	130.02	121.97	17.73	17.1	16.83	18.81	18.58	111.842	17.81	-2.6507	1.9337e-200	4.4451e-198	STRAP	PREDICTED: serine-threonine kinase receptor-associated protein isoform X2 [Bactrocera dorsalis]	Genetic Information Processing	Translation	ko03013//RNA transport	K13137	GO:0043234//protein complex	-	GO:0006796//phosphate-containing compound metabolic process;GO:0035114//imaginal disc-derived appendage morphogenesis
LOC105225772	3878	3328	3884	3568	3150	703	1159	604	860	943	123.53	125.45	123.66	130.03	117.41	28.4	34.78	27.2	34.28	32.92	124.016	31.516	-1.97637	1.59825e-196	3.59899e-194	Nlp	PREDICTED: nucleoplasmin-like protein [Bactrocera dorsalis]	-	-	-	-	-	-	-
LOC105227022	5224	4800	4992	3706	4106	388	689	292	354	477	150.58	163.72	143.82	122.21	138.48	14.18	18.71	11.9	12.77	15.07	143.762	14.526	-3.30697	1.66626e-196	3.67709e-194	mod	DNA-binding protein modulo, partial [Bactrocera dorsalis]	Human Diseases	Infectious diseases	ko05130//Pathogenic Escherichia coli infection	K11294	-	-	-
LOC105231586	1322	1008	1136	1126	1011	3373	4177	3017	3546	4073	39.96	36.74	34.8	38.94	36.28	130.45	120.18	128.95	134.99	135.39	37.344	129.992	1.79947	1.33897e-195	2.8969e-193	VCP	PREDICTED: venom serine carboxypeptidase [Bactrocera dorsalis]	-	-	-	-	-	GO:0004180//carboxypeptidase activity	GO:0019538//protein metabolic process;GO:0044765//single-organism transport
LOC105225267	1316	1018	1216	1136	1078	158	240	156	195	164	57.71	52.83	53.3	56.99	55.31	8.79	9.91	9.67	10.7	7.88	55.228	9.39	-2.5562	1.52157e-195	3.22866e-193	RRS1	PREDICTED: ribosome biogenesis regulatory protein homolog [Bactrocera dorsalis]	-	-	-	-	-	-	GO:0022613//ribonucleoprotein complex biogenesis
LOC105228227	3553	3019	3538	3254	2994	5829	7741	4930	5838	6474	121.37	122.04	120.8	127.17	119.67	252.53	249.11	238.12	249.59	242.39	122.21	246.348	1.01134	2.67542e-195	5.56992e-193	PGRMC1	PREDICTED: membrane-associated progesterone receptor component 1 [Bactrocera dorsalis]	-	-	-	-	GO:0016020//membrane;GO:0044464//cell part	GO:0032934//sterol binding	-
LOC105223876	2171	1680	1918	2160	1771	8067	10807	8119	8242	8986	54.53	49.93	48.15	62.07	52.05	257.3	256.01	288.34	259.08	247.53	53.346	261.652	2.2942	4.23108e-195	8.64551e-193	SCP2	PREDICTED: non-specific lipid-transfer protein [Bactrocera dorsalis]	Metabolism;Cellular Processes;Organismal Systems;Metabolism	Global and overview maps;Transport and catabolism;Endocrine system;Lipid metabolism	ko01100//Metabolic pathways;ko04146//Peroxisome;ko03320//PPAR signaling pathway;ko00120//Primary bile acid biosynthesis	K08764;K08764;K08764;K08764	-	GO:0016746//transferase activity, transferring acyl groups	-
LOC105231752	96	80	92	102	72	610	911	590	595	816	5.11	5.04	4.89	6.21	4.48	41.17	45.67	44.4	39.63	47.59	5.146	43.692	3.08585	1.62359e-192	3.25722e-190	Rdh14	PREDICTED: LOW QUALITY PROTEIN: retinol dehydrogenase 14 [Bactrocera dorsalis]	-	-	-	-	-	GO:0003824//catalytic activity	GO:0044710//single-organism metabolic process
LOC105233682	7399	6145	7175	6643	6994	1248	1809	1118	1484	1787	73.13	71.87	70.88	75.12	80.89	15.64	16.84	15.62	18.36	19.36	74.378	17.164	-2.11549	7.33365e-192	1.44499e-189	IPO4	PREDICTED: importin-4 [Bactrocera latifrons]	-	-	-	-	-	GO:0017016//Ras GTPase binding	-
LOC105226515	2739	2540	2863	2676	2499	329	633	290	378	472	58.8	64.52	61.43	65.72	62.77	8.96	12.8	8.8	10.16	11.11	62.648	10.366	-2.59541	5.45023e-190	1.05505e-187	bys	PREDICTED: bystin [Bactrocera dorsalis]	-	-	-	-	GO:0043231//intracellular membrane-bounded organelle	-	GO:0030154//cell differentiation
LOC105233830	332	278	285	262	288	1106	1595	946	997	1260	9.45	9.36	8.11	8.53	9.59	39.91	42.75	38.06	35.5	39.3	9.008	39.104	2.11804	9.18003e-188	1.74642e-185	Spn27A	PREDICTED: serine protease inhibitor 27A-like [Bactrocera dorsalis]	-	-	-	-	-	-	-
LOC105222055	237	150	180	212	204	1419	2044	1399	1619	1465	13.21	9.89	10.02	13.51	13.3	100.27	107.29	110.22	112.9	89.47	11.986	104.03	3.11758	4.77871e-186	8.937e-184	-	-	-	-	-	-	-	-	-
LOC105223612	1805	1513	1729	1724	1477	5499	7504	5454	5412	5895	71.46	70.88	68.41	78.08	68.42	276.08	279.84	305.28	268.13	255.77	71.45	277.02	1.95498	7.81179e-186	1.43659e-183	TECR	PREDICTED: very-long-chain enoyl-CoA reductase [Bactrocera dorsalis]	Metabolism;Metabolism;Metabolism;Metabolism	Global and overview maps;Global and overview maps;Lipid metabolism;Lipid metabolism	ko01100//Metabolic pathways;ko01212//Fatty acid metabolism;ko01040//Biosynthesis of unsaturated fatty acids;ko00062//Fatty acid elongation	K10258;K10258;K10258;K10258	GO:0031224//intrinsic component of membrane	GO:0016491//oxidoreductase activity	GO:0044238//primary metabolic process;GO:0044710//single-organism metabolic process
LOC105232569	4815	3738	3930	3994	3473	475	890	502	586	760	133.38	122.53	108.81	126.58	112.57	16.69	23.22	19.66	20.32	23.07	120.774	20.592	-2.55215	2.69719e-185	4.87881e-183	Nop56	PREDICTED: nucleolar protein 56 [Bactrocera dorsalis]	Genetic Information Processing	Translation	ko03008//Ribosome biogenesis in eukaryotes	K14564	-	-	-
LOC105232334	202	178	200	256	178	1876	2600	2250	2000	2546	2.32	2.42	2.3	3.37	2.4	27.37	28.18	36.6	28.8	32.1	2.562	30.61	3.57866	6.39501e-185	1.1381e-182	CD109	PREDICTED: CD109 antigen [Bactrocera dorsalis]	-	-	-	-	GO:0044421//extracellular region part	-	GO:0010466//negative regulation of peptidase activity
LOC105227987	1066	822	863	948	844	60	108	65	92	70	31.62	28.85	25.58	32.17	29.29	2.26	3.02	2.73	3.41	2.28	29.502	2.74	-3.42856	2.05624e-180	3.60135e-178	Cyp313a4	PREDICTED: probable cytochrome P450 313a4 [Bactrocera dorsalis]	-	-	-	-	-	GO:0016491//oxidoreductase activity;GO:0046872//metal ion binding	-
LOC105228451	6397	5471	6039	5672	5025	14155	16969	11747	14349	16000	230.33	233.11	217.33	233.64	211.71	646.35	575.56	598.04	646.58	631.4	225.224	619.586	1.45994	4.95314e-180	8.53952e-178	--	PREDICTED: C3 and PZP-like alpha-2-macroglobulin domain-containing protein 8 [Bactrocera dorsalis]	-	-	-	-	GO:0044424//intracellular part	GO:0008171//O-methyltransferase activity	-
LOC105223010	1812	1310	1679	1353	1452	4384	6577	4103	4134	5446	13.97	12.09	13.04	11.94	13.25	42.88	47.26	44.29	40.37	46.01	12.858	44.162	1.78014	8.56807e-180	1.45446e-177	Abca13	PREDICTED: ATP-binding cassette sub-family A member 13 [Bactrocera dorsalis]	-	-	-	-	GO:0031224//intrinsic component of membrane	GO:0017111//nucleoside-triphosphatase activity;GO:0032550//purine ribonucleoside binding	GO:0051234//establishment of localization
LOC105224424	9312	7703	8613	8313	7571	2624	3306	2051	2724	3091	115.67	113.22	106.93	118.13	110.04	41.33	38.68	36.02	42.35	42.08	112.798	40.092	-1.49236	6.68318e-178	1.11731e-175	Sf3b3	PREDICTED: splicing factor 3B subunit 3 [Bactrocera dorsalis]	Genetic Information Processing	Transcription	ko03040//Spliceosome	K12830	GO:0005681//spliceosomal complex;GO:0097525//spliceosomal snRNP complex	-	GO:0000377//RNA splicing, via transesterification reactions with bulged adenosine as nucleophile;GO:0007051//spindle organization;GO:0030154//cell differentiation
LOC105230146	1861	1472	1636	1603	1570	385	575	306	377	449	38.81	36.33	34.1	38.25	38.31	10.18	11.3	9.02	9.84	10.26	37.16	10.12	-1.87654	5.37099e-177	8.8453e-175	DDX27	PREDICTED: probable ATP-dependent RNA helicase DDX27 [Bactrocera dorsalis]	-	-	-	-	-	GO:0017111//nucleoside-triphosphatase activity;GO:0032550//purine ribonucleoside binding	-
LOC105222930	41646	35846	42704	32584	32552	10445	13714	8370	9397	11172	1988.16	2025.02	2037.59	1779.61	1818.35	632.37	616.74	564.98	561.43	584.54	1929.75	592.012	-1.70471	5.40784e-173	8.77502e-171	CAPSL	PREDICTED: calcyphosin-like protein [Bactrocera dorsalis]	-	-	-	-	-	-	-
LOC105225773	1732	1559	1710	1641	1493	315	390	256	339	417	92.06	98.05	90.81	99.76	92.81	21.23	19.53	19.24	22.55	24.29	94.698	21.368	-2.14788	1.45545e-171	2.32745e-169	Nlp	PREDICTED: nucleoplasmin-like protein [Bactrocera dorsalis]	-	-	-	-	-	-	-
LOC105233034	13822	8385	12264	7232	7374	648	838	536	653	838	297.44	213.52	263.77	178.05	185.68	17.68	16.99	16.31	17.59	19.76	227.692	17.666	-3.68804	1.06445e-170	1.67788e-168	--	PREDICTED: uncharacterized protein LOC105233034 [Bactrocera dorsalis]	-	-	-	-	-	GO:0003824//catalytic activity	GO:0008152//metabolic process
LOC105231997	2615	1980	2227	2106	2014	542	757	508	528	684	33.4	29.93	28.43	30.77	30.1	8.78	9.11	9.17	8.44	9.57	30.526	9.014	-1.7598	4.84153e-170	7.52415e-168	mybbp1a	PREDICTED: DNA polymerase V [Bactrocera dorsalis]	-	-	-	-	-	GO:0034061//DNA polymerase activity	GO:0006259//DNA metabolic process;GO:0034645//cellular macromolecule biosynthetic process
LOC105234043	635	388	541	540	538	2389	4091	2596	2686	3093	20.95	15.15	17.84	20.39	20.77	99.97	127.17	121.12	110.92	111.86	19.02	114.208	2.58607	8.99014e-168	1.37774e-165	--	GM17948 [Drosophila sechellia]	-	-	-	-	-	GO:0016740//transferase activity	GO:0006796//phosphate-containing compound metabolic process
LOC105228312	340	269	351	312	277	1110	1561	934	1358	1324	18.26	17.09	18.84	19.17	17.41	75.59	78.97	70.92	91.27	77.92	18.154	78.934	2.12036	5.87246e-167	8.87627e-165	DCXR	PREDICTED: L-xylulose reductase [Bactrocera dorsalis]	Metabolism;Metabolism	Global and overview maps;Carbohydrate metabolism	ko01100//Metabolic pathways;ko00040//Pentose and glucuronate interconversions	K03331;K03331	-	GO:0003824//catalytic activity	GO:0044710//single-organism metabolic process
LOC105230249	3417	2856	3062	3263	3041	599	786	425	483	705	62.02	61.34	55.55	67.75	64.58	13.79	13.44	10.91	10.97	14.02	62.248	12.626	-2.30163	8.67822e-167	1.29399e-164	-	-	-	-	-	-	-	-	-
LOC105227859	1521	959	1651	959	1146	32	64	40	48	65	71.71	53.51	77.8	51.73	63.22	1.91	2.84	2.67	2.83	3.36	63.594	2.722	-4.54615	2.88453e-166	4.24372e-164	--	CG14566 [Drosophila busckii]	-	-	-	-	-	-	-
LOC105231830	125	126	123	163	111	1091	1298	900	976	1018	2.45	2.92	2.41	3.65	2.55	27.12	23.96	24.94	23.94	21.87	2.796	24.366	3.12343	6.70549e-166	9.73532e-164	Hsc70-2	PREDICTED: heat shock 70 kDa protein cognate 2 [Bactrocera dorsalis]	Genetic Information Processing;Genetic Information Processing;Cellular Processes;Human Diseases;Environmental Information Processing;Human Diseases;Organismal Systems;Organismal Systems;Human Diseases;Human Diseases;Human Diseases;Organismal Systems;Human Diseases	Transcription;Folding, sorting and degradation;Transport and catabolism;Infectious diseases;Signal transduction;Infectious diseases;Endocrine system;Aging;Infectious diseases;Infectious diseases;Infectious diseases;Immune system;Neurodegenerative diseases	ko03040//Spliceosome;ko04141//Protein processing in endoplasmic reticulum;ko04144//Endocytosis;ko05169//Epstein-Barr virus infection;ko04010//MAPK signaling pathway;ko05164//Influenza A;ko04915//Estrogen signaling pathway;ko04213//Longevity regulating pathway - multiple species;ko05145//Toxoplasmosis;ko05162//Measles;ko05134//Legionellosis;ko04612//Antigen processing and presentation;ko05020//Pri…	K03283;K03283;K03283;K03283;K03283;K03283;K03283;K03283;K03283;K03283;K03283;K03283;K03283	-	GO:0032550//purine ribonucleoside binding	-
LOC105234028	17285	12976	17436	12482	10954	92777	105165	74932	85825	79063	1732.56	1539.12	1746.77	1431.35	1284.73	11793.5	9929.98	10619.7	10766.2	8685.58	1546.91	10359	2.74343	2.1914e-163	3.14024e-161	--	PREDICTED: protease inhibitor-like [Bactrocera dorsalis]	-	-	-	-	-	-	-
LOC105225762	27	31	34	41	34	512	815	447	442	560	0.64	0.87	0.81	1.1	0.94	15.37	18.09	14.94	13.04	14.48	0.872	15.184	4.12208	1.7291e-162	2.44602e-160	Tmprss15	PREDICTED: serine protease gd isoform X1 [Bactrocera dorsalis]	-	-	-	-	-	-	-
LOC105233875	2192	1973	2411	1934	2165	276	371	148	221	269	131.04	139.57	144.06	132.27	151.44	20.92	20.89	12.51	16.53	17.62	139.676	17.694	-2.98075	6.33286e-160	8.84517e-158	PCP27	PREDICTED: endocuticle structural glycoprotein SgAbd-2 [Bactrocera dorsalis]	-	-	-	-	-	-	-
LOC105221806	1590	1359	1606	1432	1429	404	616	354	424	487	32.14	32.52	32.45	33.12	33.81	10.35	11.73	10.11	10.73	10.78	32.808	10.74	-1.61105	7.15516e-160	9.86875e-158	RRN3	PREDICTED: RNA polymerase I-specific transcription initiation factor RRN3 [Bactrocera dorsalis]	-	-	-	-	-	-	GO:0006412//translation
LOC105232870	18816	16155	19635	17502	16456	6517	9156	6042	6859	8138	664.48	675.11	693.04	707.11	679.99	291.87	304.59	301.69	303.14	314.98	683.946	303.254	-1.17336	9.47504e-157	1.29071e-154	Btf3l4	PREDICTED: transcription factor BTF3 homolog 4 [Bactrocera dorsalis]	Cellular Processes	Cell growth and death	ko04214//Apoptosis - fly	K01527	-	-	-
LOC105229563	823	688	777	678	631	92	166	96	96	113	20.89	20.66	19.71	19.69	18.74	2.96	3.97	3.45	3.05	3.14	19.938	3.314	-2.58888	8.04199e-155	1.08214e-152	trmt44	PREDICTED: probable tRNA (uracil-O(2)-)-methyltransferase [Bactrocera dorsalis]	-	-	-	-	-	-	-
LOC105226434	49836	41325	46307	39757	43919	7942	14000	6391	9016	10490	998.69	979.96	927.48	911.47	1029.82	201.84	264.28	181.08	226.11	230.39	969.484	220.74	-2.13487	3.7044e-154	4.92462e-152	Hsp83	PREDICTED: heat shock protein 83 [Bactrocera dorsalis]	Human Diseases;Genetic Information Processing;Environmental Information Processing;Human Diseases;Human Diseases;Organismal Systems;Organismal Systems;Cellular Processes;Organismal Systems;Organismal Systems;Organismal Systems;Organismal Systems	Cancers;Folding, sorting and degradation;Signal transduction;Cardiovascular diseases;Cancers;Endocrine system;Endocrine system;Cell growth and death;Immune system;Immune system;Immune system;Immune system	ko05200//Pathways in cancer;ko04141//Protein processing in endoplasmic reticulum;ko04151//PI3K-Akt signaling pathway;ko05418//Fluid shear stress and atherosclerosis;ko05215//Prostate cancer;ko04915//Estrogen signaling pathway;ko04914//Progesterone-mediated oocyte maturation;ko04217//Necroptosis;ko04621//NOD-like receptor signaling pathway;ko04659//Th17 cell differentiation;ko04657//IL-17 signalin…	K04079;K04079;K04079;K04079;K04079;K04079;K04079;K04079;K04079;K04079;K04079;K04079	-	GO:0005515//protein binding	GO:0044267//cellular protein metabolic process;GO:0050896//response to stimulus
LOC105225278	468	431	443	380	407	1736	2469	1914	1892	1962	16.02	17.46	15.15	14.88	16.3	75.35	79.61	92.63	81.04	73.6	15.962	80.446	2.33338	8.69826e-153	1.14258e-150	HSD3B1	PREDICTED: 3 beta-hydroxysteroid dehydrogenase/Delta 5-->4-isomerase type 2 [Bactrocera dorsalis]	-	-	-	-	-	GO:0016614//oxidoreductase activity, acting on CH-OH group of donors;GO:0016836//hydro-lyase activity	GO:0008202//steroid metabolic process;GO:0009117//nucleotide metabolic process
LOC105226833	2798	2410	2630	2385	2470	651	937	613	745	888	85.65	87.3	80.47	83.52	88.47	25.27	27.02	26.53	28.54	29.79	85.082	27.43	-1.6331	3.1087e-152	4.03546e-150	Ahsa1	PREDICTED: activator of 90 kDa heat shock protein ATPase homolog 1 [Bactrocera dorsalis]	-	-	-	-	-	GO:0005515//protein binding	GO:0043462//regulation of ATPase activity;GO:0050896//response to stimulus
LOC105225270	608	437	639	518	497	36	41	28	23	41	11.49	9.78	12.07	11.2	10.99	0.86	0.73	0.75	0.54	0.85	11.106	0.746	-3.89602	5.21233e-152	6.68754e-150	Eip74EF	PREDICTED: ecdysone-induced protein 74EF [Bactrocera dorsalis]	Cellular Processes	Cell growth and death	ko04214//Apoptosis - fly	K09428	-	-	-
LOC105229886	1112	1078	1079	1071	1059	3037	4199	2491	2697	3444	24.96	28.63	24.2	27.5	27.81	86.44	88.77	79.05	75.75	84.71	26.62	82.944	1.63963	1.61726e-151	2.05113e-149	Gel	PREDICTED: gelsolin [Bactrocera dorsalis]	Human Diseases;Cellular Processes;Organismal Systems	Cancers;Cell motility;Immune system	ko05203//Viral carcinogenesis;ko04810//Regulation of actin cytoskeleton;ko04666//Fc gamma R-mediated phagocytosis	K05768;K05768;K05768	-	GO:0046872//metal ion binding	GO:0051693//actin filament capping
LOC105225347	875	840	981	860	913	51	125	57	75	68	9.19	10.44	10.29	10.33	11.22	0.68	1.24	0.85	0.99	0.78	10.294	0.908	-3.50297	5.58694e-151	7.00526e-149	Larp6	La-related protein 6, partial [Bactrocera dorsalis]	-	-	-	-	-	-	-
LOC105221928	11	14	16	10	13	692	645	518	704	625	0.55	0.83	0.8	0.57	0.76	44.11	30.54	36.81	44.28	34.43	0.702	38.034	5.75967	2.68025e-148	3.3229e-146	--	GH14025 [Drosophila grimshawi]	-	-	-	-	-	-	-
LOC105232787	2950	2366	2678	2553	2314	893	1248	748	927	1115	65.51	66.35	60.5	64.35	62.01	26.84	28.72	24.96	28.17	29.47	63.744	27.632	-1.20595	6.81375e-148	8.35366e-146	Rb97D	PREDICTED: ribonucleoprotein RB97D isoform X1 [Bactrocera dorsalis]	Genetic Information Processing	Translation	ko03015//mRNA surveillance pathway	K14411	-	-	-
LOC105224471	1767	1425	1721	1515	1428	458	659	399	504	604	35.81	34.18	34.86	35.13	33.87	11.77	12.58	11.43	12.78	13.42	34.77	12.396	-1.48797	3.57103e-147	4.32997e-145	CG11583	PREDICTED: ribosome biogenesis protein BRX1 homolog [Bactrocera dorsalis]	-	-	-	-	-	-	-
LOC105233004	92	67	38	58	38	1121	1325	902	1354	1267	2.01	1.74	0.84	1.41	0.91	30.67	27.19	27.29	36.24	29.81	1.382	30.24	4.45163	3.1548e-146	3.7837e-144	SLC17A5	PREDICTED: sialin [Bactrocera dorsalis]	-	-	-	-	-	-	GO:0044763//single-organism cellular process
LOC105226475	1376	1169	1180	1169	1066	249	318	188	256	312	30.6	30.76	26.23	29.74	27.74	7.02	6.66	5.91	7.12	7.6	29.014	6.862	-2.08005	4.3879e-146	5.20603e-144	UTP4	PREDICTED: U3 small nucleolar RNA-associated protein 4 homolog [Bactrocera dorsalis]	Genetic Information Processing	Translation	ko03008//Ribosome biogenesis in eukaryotes	K14548	-	-	-
LOC105232797	10099	8366	9183	8140	8231	1878	3324	1561	2100	2379	225.08	217.54	201.43	204.61	211.54	54.21	71.81	49.48	59.16	60.32	212.04	58.996	-1.84565	6.09742e-146	7.15733e-144	Hrb87F	PREDICTED: heterogeneous nuclear ribonucleoprotein A1 [Bactrocera dorsalis]	Genetic Information Processing	Transcription	ko03040//Spliceosome	K12741	-	GO:0097159//organic cyclic compound binding	-
LOC105225770	6004	5370	6349	4507	4852	541	806	634	599	528	144.72	152.83	152.9	124.36	136.94	16.75	18.44	21.89	18.25	14.19	142.35	17.904	-2.99109	6.2284e-146	7.23413e-144	SLC26A11	PREDICTED: sodium-independent sulfate anion transporter isoform X1 [Bactrocera dorsalis]	-	-	-	-	GO:0031224//intrinsic component of membrane	GO:0015103//inorganic anion transmembrane transporter activity	GO:0008272//sulfate transport;GO:0044763//single-organism cellular process
LOC105227725	279	239	322	267	248	808	1076	667	787	892	15.88	16.1	18.32	17.38	16.51	58.32	57.68	53.67	56.05	55.64	16.838	56.272	1.7407	2.1267e-144	2.44438e-142	GST1	PREDICTED: glutathione S-transferase 1 [Bactrocera dorsalis]	Human Diseases;Human Diseases;Metabolism;Organismal Systems;Human Diseases;Human Diseases;Metabolism;Metabolism;Metabolism;Human Diseases;Human Diseases	Cancers;Cancers;Xenobiotics biodegradation and metabolism;Aging;Cardiovascular diseases;Cancers;Xenobiotics biodegradation and metabolism;Metabolism of other amino acids;Xenobiotics biodegradation and metabolism;Cancers;Drug resistance	ko05200//Pathways in cancer;ko05225//Hepatocellular carcinoma;ko00983//Drug metabolism - other enzymes;ko04212//Longevity regulating pathway - worm;ko05418//Fluid shear stress and atherosclerosis;ko05215//Prostate cancer;ko00980//Metabolism of xenobiotics by cytochrome P450;ko00480//Glutathione metabolism;ko00982//Drug metabolism - cytochrome P450;ko05204//Chemical carcinogenesis;ko01524//Platinu…	K00799;K00799;K00799;K00799;K00799;K00799;K00799;K00799;K00799;K00799;K00799	-	GO:0003824//catalytic activity	-
LOC105222716	937	850	923	875	875	170	240	144	163	226	17.48	18.76	17.21	18.67	19.1	4.02	4.22	3.8	3.8	4.62	18.244	4.092	-2.15654	4.11161e-144	4.67706e-142	Prat	PREDICTED: amidophosphoribosyltransferase [Bactrocera dorsalis]	Metabolism;Metabolism;Metabolism	Global and overview maps;Nucleotide metabolism;Amino acid metabolism	ko01100//Metabolic pathways;ko00230//Purine metabolism;ko00250//Alanine, aspartate and glutamate metabolism	K00764;K00764;K00764	-	GO:0016740//transferase activity;GO:0043169//cation binding;GO:0051540//metal cluster binding	GO:0006144//purine nucleobase metabolic process;GO:0006188//IMP biosynthetic process
LOC105224702	5371	4185	4468	4453	4010	922	1203	687	971	1256	139.85	128.95	116.27	132.65	122.17	30.44	29.51	25.29	31.64	35.84	127.978	30.544	-2.06693	1.13077e-143	1.27315e-141	Nop60B	H/ACA ribonucleoprotein complex subunit 4, partial [Bactrocera dorsalis]	Genetic Information Processing	Translation	ko03008//Ribosome biogenesis in eukaryotes	K11131	GO:0032991//macromolecular complex;GO:0043231//intracellular membrane-bounded organelle;GO:0043232//intracellular non-membrane-bounded organelle;GO:0044423//virion part	GO:0003676//nucleic acid binding;GO:0016836//hydro-lyase activity;GO:0016866//intramolecular transferase activity	GO:0003006//developmental process involved in reproduction;GO:0007444//imaginal disc development;GO:0009451//RNA modification;GO:0010467//gene expression;GO:0016072//rRNA metabolic process;GO:0022613//ribonucleoprotein complex biogenesis;GO:0030154//cell differentiation;GO:0033554//cellular response to stress
LOC105232872	36	33	25	40	35	552	838	427	483	491	1.07	1.16	0.74	1.35	1.21	20.72	23.36	17.87	17.89	15.92	1.106	19.152	4.11407	1.20492e-143	1.34294e-141	-	-	-	-	-	-	-	-	-
LOC105231341	1199	950	1103	1024	931	275	344	205	274	284	78.45	73.55	72.13	76.65	71.28	22.82	21.2	18.97	22.44	20.37	74.412	21.16	-1.8142	1.35942e-143	1.49999e-141	--	PREDICTED: protein LLP homolog [Bactrocera dorsalis]	-	-	-	-	-	-	-
LOC105222871	1201	942	1021	917	939	188	291	174	216	262	26.92	24.99	22.87	23.52	24.63	5.34	6.14	5.51	6.06	6.44	24.586	5.898	-2.05954	1.72051e-143	1.87961e-141	peng	PREDICTED: protein penguin [Bactrocera dorsalis]	-	-	-	-	-	-	-
LOC105223135	8306	7076	8508	7201	7212	2910	4203	2672	2931	3634	113.92	114.84	116.63	112.99	115.74	50.62	54.3	51.82	50.31	54.63	114.824	52.336	-1.13355	1.98232e-143	2.1444e-141	-	-	-	-	-	-	-	-	-
LOC105228100	2212	1802	1924	1853	1679	477	713	390	416	534	56.09	54.07	48.76	53.75	49.82	15.34	17.03	13.98	13.2	14.84	52.498	14.878	-1.81908	1.20983e-142	1.29605e-140	--	PREDICTED: WD repeat-containing protein 43 [Bactrocera dorsalis]	Genetic Information Processing	Translation	ko03008//Ribosome biogenesis in eukaryotes	K14546	-	-	-
LOC105228163	13159	11151	13228	10880	10861	2740	4912	2659	2973	3565	598.26	599.71	601.1	565.93	577.94	158.18	210.46	171.11	169.23	177.7	588.588	177.336	-1.73077	2.6487e-141	2.81017e-139	Taldo	PREDICTED: probable transaldolase isoform X1 [Bactrocera dorsalis]	Metabolism;Metabolism;Metabolism;Metabolism	Global and overview maps;Global and overview maps;Global and overview maps;Carbohydrate metabolism	ko01100//Metabolic pathways;ko01200//Carbon metabolism;ko01230//Biosynthesis of amino acids;ko00030//Pentose phosphate pathway	K00616;K00616;K00616;K00616	GO:0044424//intracellular part	GO:0016744//transferase activity, transferring aldehyde or ketonic groups	GO:0006739//NADP metabolic process
LOC105222319	3189	2909	2718	2334	2219	8256	11746	7125	9014	10027	64.66	69.8	55.08	54.14	52.64	212.29	224.35	204.26	228.73	222.82	59.264	218.49	1.88234	2.72396e-141	2.8625e-139	Inos	PREDICTED: inositol-3-phosphate synthase [Bactrocera dorsalis]	Metabolism;Metabolism	Global and overview maps;Carbohydrate metabolism	ko01100//Metabolic pathways;ko00562//Inositol phosphate metabolism	K01858;K01858	-	-	GO:0006020//inositol metabolic process;GO:0006644//phospholipid metabolic process
LOC105232621	976	856	997	909	831	3285	4829	2803	3812	3115	23.1	23.97	23.58	24.61	23.01	98.6	107.67	93.8	112.91	80.8	23.654	98.756	2.06178	8.61665e-139	8.96944e-137	ACAT2	PREDICTED: acetyl-CoA acetyltransferase, cytosolic [Bactrocera dorsalis]	Metabolism;Metabolism;Metabolism;Metabolism;Metabolism;Metabolism;Metabolism;Metabolism;Metabolism;Organismal Systems;Metabolism;Metabolism;Metabolism;Metabolism	Global and overview maps;Global and overview maps;Global and overview maps;Amino acid metabolism;Carbohydrate metabolism;Lipid metabolism;Amino acid metabolism;Carbohydrate metabolism;Metabolism of terpenoids and polyketides;Digestive system;Carbohydrate metabolism;Amino acid metabolism;Carbohydrate metabolism;Lipid metabolism	ko01100//Metabolic pathways;ko01200//Carbon metabolism;ko01212//Fatty acid metabolism;ko00310//Lysine degradation;ko00620//Pyruvate metabolism;ko00071//Fatty acid degradation;ko00280//Valine, leucine and isoleucine degradation;ko00630//Glyoxylate and dicarboxylate metabolism;ko00900//Terpenoid backbone biosynthesis;ko04975//Fat digestion and absorption;ko00640//Propanoate metabolism;ko00380//Tryp…	K00626;K00626;K00626;K00626;K00626;K00626;K00626;K00626;K00626;K00626;K00626;K00626;K00626;K00626	-	GO:0016746//transferase activity, transferring acyl groups	-
LOC105230756	2451	2017	2245	2150	1826	6232	9129	6177	5875	6610	47.01	45.78	43.04	47.18	40.98	151.6	164.96	167.53	141.03	138.96	44.798	152.816	1.77029	3.24172e-138	3.34291e-136	ABCG1	PREDICTED: ATP-binding cassette sub-family G member 1 [Bactrocera dorsalis]	Environmental Information Processing	Membrane transport	ko02010//ABC transporters	K05679	-	GO:0017111//nucleoside-triphosphatase activity;GO:0032550//purine ribonucleoside binding	-
LOC105222762	3666	3036	3752	3060	3189	995	1573	924	1003	1186	163.12	161.6	164.44	164.08	156.08	57.23	69.83	65.34	56.29	61.77	161.864	62.092	-1.3823	1.41425e-136	1.4449e-134	ACB2	PREDICTED: acyl-CoA-binding domain-containing protein 6-like isoform X1 [Bactrocera dorsalis]	-	-	-	-	-	-	-
LOC105229863	3624	3104	3380	3177	3125	739	1075	565	805	1046	126.8	128.52	118.2	127.18	127.94	32.79	35.43	27.95	35.25	40.11	125.728	34.306	-1.87377	3.70077e-136	3.74627e-134	FK506-bp1	PREDICTED: 39 kDa FK506-binding nuclear protein [Bactrocera dorsalis]	-	-	-	-	GO:0030529//intracellular ribonucleoprotein complex	-	GO:0010467//gene expression;GO:0044267//cellular protein metabolic process
LOC105228156	8045	6533	7721	6746	6841	782	1726	681	896	1023	269.13	258.62	258.16	258.19	267.78	33.18	54.39	32.21	37.51	37.51	262.376	38.96	-2.75157	9.39573e-136	9.42477e-134	nap1l1-a	PREDICTED: nucleosome assembly protein 1-like 1 [Bactrocera dorsalis]	-	-	-	-	-	-	GO:0034728//nucleosome organization
LOC105223799	1488	1182	1266	1400	1190	4110	5026	2934	4058	4168	49.25	46.3	41.88	53.02	46.09	172.53	156.72	137.32	168.1	151.21	47.308	157.176	1.73222	1.22682e-135	1.21952e-133	--	Icarapin-like protein [Bactrocera dorsalis]	-	-	-	-	-	-	-
LOC105223778	12838	11764	14260	10058	11265	2848	3529	2317	2493	2789	245.9	266.64	272.99	220.4	252.47	69.18	63.68	62.75	59.76	58.55	251.68	62.784	-2.00312	1.59739e-135	1.57371e-133	Tret1-2	PREDICTED: facilitated trehalose transporter Tret1-2 homolog [Bactrocera dorsalis]	-	-	-	-	GO:0031224//intrinsic component of membrane	GO:0022857//transmembrane transporter activity	GO:0044763//single-organism cellular process;GO:0051234//establishment of localization
LOC105226526	2728	2107	2479	2293	2267	780	1121	697	736	951	28.57	26.11	25.95	27.47	27.78	10.36	11.06	10.32	9.65	10.92	27.176	10.462	-1.37717	1.43842e-134	1.40456e-132	RpI1	PREDICTED: DNA-directed RNA polymerase I subunit RPA1 [Bactrocera dorsalis]	Metabolism;Metabolism;Metabolism;Genetic Information Processing	Global and overview maps;Nucleotide metabolism;Nucleotide metabolism;Transcription	ko01100//Metabolic pathways;ko00230//Purine metabolism;ko00240//Pyrimidine metabolism;ko03020//RNA polymerase	K02999;K02999;K02999;K02999	GO:0043231//intracellular membrane-bounded organelle	GO:0034062//RNA polymerase activity;GO:0046914//transition metal ion binding	GO:0034645//cellular macromolecule biosynthetic process
LOC105229656	9923	9476	9256	7343	7595	1724	1907	1190	1454	1813	390.51	441.29	364.07	330.6	349.74	86.04	70.7	66.22	71.61	78.2	375.242	74.554	-2.33146	2.12144e-134	2.05334e-132	Hemk1	PREDICTED: hemK methyltransferase family member 1 [Bactrocera dorsalis]	-	-	-	-	-	GO:0008168//methyltransferase activity	GO:0008213//protein alkylation
LOC105225544	1161	890	978	872	876	182	233	152	198	241	48.55	44.03	40.92	41.83	42.82	9.72	9.17	9.05	10.4	11.08	43.63	9.884	-2.14215	7.82421e-134	7.50716e-132	mak16-a	PREDICTED: protein MAK16 homolog [Bactrocera dorsalis]	-	-	-	-	-	-	GO:0030154//cell differentiation
LOC105226742	56310	50455	59988	41127	47953	12639	15860	10083	11808	14029	361.82	383.64	385.25	302.33	360.53	102.99	96	91.61	94.95	98.8	358.714	96.87	-1.88871	9.76749e-134	9.2909e-132	Fasn	PREDICTED: fatty acid synthase [Bactrocera dorsalis]	Metabolism;Organismal Systems;Environmental Information Processing;Metabolism;Metabolism	Global and overview maps;Endocrine system;Signal transduction;Global and overview maps;Lipid metabolism	ko01100//Metabolic pathways;ko04910//Insulin signaling pathway;ko04152//AMPK signaling pathway;ko01212//Fatty acid metabolism;ko00061//Fatty acid biosynthesis	K00665;K00665;K00665;K00665;K00665	-	GO:0016297//acyl-[acyl-carrier-protein] hydrolase activity;GO:0019842//vitamin binding;GO:0046914//transition metal ion binding	GO:0044710//single-organism metabolic process
LOC105229168	212	164	209	224	152	1416	1396	1198	1207	1346	5.03	4.6	4.95	6.08	4.22	42.58	31.18	40.16	35.82	34.98	4.976	36.944	2.89228	5.25671e-133	4.95749e-131	CG5009	PREDICTED: probable peroxisomal acyl-coenzyme A oxidase 1 [Bactrocera dorsalis]	Metabolism;Cellular Processes;Environmental Information Processing;Metabolism;Metabolism;Organismal Systems;Metabolism;Metabolism	Global and overview maps;Transport and catabolism;Signal transduction;Global and overview maps;Lipid metabolism;Endocrine system;Lipid metabolism;Lipid metabolism	ko01100//Metabolic pathways;ko04146//Peroxisome;ko04024//cAMP signaling pathway;ko01212//Fatty acid metabolism;ko00071//Fatty acid degradation;ko03320//PPAR signaling pathway;ko01040//Biosynthesis of unsaturated fatty acids;ko00592//alpha-Linolenic acid metabolism	K00232;K00232;K00232;K00232;K00232;K00232;K00232;K00232	GO:0042579//microbody	GO:0000166//nucleotide binding;GO:0016634//oxidoreductase activity, acting on the CH-CH group of donors, oxygen as acceptor	GO:0009062//fatty acid catabolic process
LOC105225740	443	377	454	379	390	20	26	8	24	28	10.54	10.22	10.46	9.91	10.61	0.56	0.56	0.26	0.79	0.78	10.348	0.59	-4.13249	1.89327e-132	1.77037e-130	AAEL008004	PREDICTED: elongation of very long chain fatty acids protein AAEL008004 [Bactrocera dorsalis]	-	-	-	-	GO:0031224//intrinsic component of membrane	GO:0003824//catalytic activity	GO:0006631//fatty acid metabolic process
LOC105229625	199	206	195	172	152	1071	1307	974	960	984	21.05	25.79	20.62	20.82	18.82	143.71	130.27	145.71	127.12	114.1	21.42	132.182	2.6255	3.12545e-132	2.898e-130	--	PREDICTED: uncharacterized protein LOC105229625 [Bactrocera dorsalis]	-	-	-	-	-	-	-
LOC105233994	2311	2064	2375	2251	2083	413	740	389	528	627	50.49	53.36	51.86	56.26	53.24	11.44	15.23	12.02	14.44	15.01	53.042	13.628	-1.96056	4.15819e-132	3.82346e-130	--	Nucleolar protein 11 [Bactrocera dorsalis]	-	-	-	-	-	-	-
LOC105230875	894	742	902	764	801	102	131	113	140	142	58.28	57.24	58.77	56.98	61.1	8.43	8.04	10.42	11.42	10.15	58.474	9.692	-2.59293	6.68192e-132	6.09325e-130	--	PREDICTED: nucleolar protein 16 [Bactrocera dorsalis]	-	-	-	-	-	-	-
LOC105222157	4060	4421	4830	3614	4475	729	1069	619	697	885	59.54	76.73	70.8	60.64	76.79	13.56	14.77	12.84	12.79	14.23	68.9	13.638	-2.33687	1.04273e-131	9.43071e-130	HOMER2	PREDICTED: homer protein homolog 2 [Bactrocera dorsalis]	Environmental Information Processing;Organismal Systems	Signal transduction;Nervous system	ko04068//FoxO signaling pathway;ko04724//Glutamatergic synapse	K15010;K15010	GO:0043005//neuron projection	GO:0005488//binding	GO:0030534//adult behavior;GO:0040011//locomotion;GO:0042753//positive regulation of circadian rhythm;GO:0097305//response to alcohol
LOC105224863	733	536	735	687	578	88	126	89	101	112	38.36	33.19	38.44	41.13	35.39	5.84	6.21	6.59	6.61	6.42	37.302	6.334	-2.55806	2.48592e-131	2.23005e-129	--	PREDICTED: nucleolin [Bactrocera dorsalis]	-	-	-	-	-	-	-
LOC105230147	1862	1566	1687	1677	1521	484	603	405	443	586	11.29	11.23	10.22	11.63	10.79	3.72	3.44	3.47	3.36	3.89	11.032	3.576	-1.62528	1.32683e-130	1.18067e-128	UTP20	PREDICTED: LOW QUALITY PROTEIN: small subunit processome component 20 homolog [Bactrocera dorsalis]	-	-	-	-	-	-	-
LOC105226454	2445	1898	2239	2203	1836	491	591	424	551	602	223.64	205.43	204.69	230.53	196.5	56.95	50.92	54.83	63.07	60.35	212.158	57.224	-1.89045	2.45909e-130	2.17069e-128	hoip	PREDICTED: NHP2-like protein 1 homolog [Bactrocera dorsalis]	Genetic Information Processing;Genetic Information Processing	Transcription;Translation	ko03040//Spliceosome;ko03008//Ribosome biogenesis in eukaryotes	K12845;K12845	GO:0005681//spliceosomal complex;GO:0043232//intracellular non-membrane-bounded organelle	GO:0044822//poly(A) RNA binding	GO:0000377//RNA splicing, via transesterification reactions with bulged adenosine as nucleophile;GO:0007399//nervous system development;GO:0010468//regulation of gene expression;GO:0022613//ribonucleoprotein complex biogenesis;GO:0048644//muscle organ morphogenesis
LOC105226247	16182	13952	17164	14326	14794	3620	6255	3331	3532	4565	373.23	380.79	395.67	378.02	399.25	105.89	135.9	108.63	101.95	115.4	385.392	113.554	-1.76295	1.05162e-129	9.20923e-128	--	PREDICTED: plasminogen activator inhibitor 1 RNA-binding protein [Bactrocera dorsalis]	-	-	-	-	GO:0005700//polytene chromosome;GO:0031332//RNAi effector complex;GO:0043231//intracellular membrane-bounded organelle;GO:0044444//cytoplasmic part	-	GO:0006325//chromatin organization;GO:0035194//posttranscriptional gene silencing by RNA
LOC105230203	1076	829	1058	886	845	2571	3049	2147	2237	2636	30.37	27.69	29.85	28.61	27.91	92.04	81.08	85.7	79.03	81.56	28.886	83.882	1.53799	2.56197e-129	2.22589e-127	Cyp6a9	PREDICTED: cytochrome P450 6a9-like [Bactrocera dorsalis]	-	-	-	-	-	-	-
MSTRG.4650	4	3	5	6	2	2370	2167	1755	4668	4152	0.47	0.42	0.59	0.81	0.27	353.03	239.77	291.46	686.17	534.49	0.512	420.984	9.68341	9.04689e-129	7.79871e-127	--	-	-	-	-	-	-	-	-
LOC105234254	1645	1398	1777	1112	1354	36	104	38	57	102	116.8	117.47	126.11	90.33	112.49	3.24	6.96	3.82	5.07	7.94	112.64	5.406	-4.38101	1.04421e-128	8.93166e-127	--	GL10758 [Drosophila persimilis]	-	-	-	-	-	-	-
LOC105232796	2803	2128	2982	2536	2254	7336	9238	6068	6310	7167	108.55	97.52	115.42	112.35	102.13	360.28	337	332.25	305.81	304.19	107.194	327.906	1.61306	8.95745e-126	7.60281e-124	--	Cpr67B [Drosophila busckii]	-	-	-	-	-	GO:0005214//structural constituent of chitin-based cuticle	GO:0042335//cuticle development
LOC105227823	607	514	632	453	511	53	60	24	33	36	5.03	5.04	5.24	4.3	4.96	0.56	0.47	0.28	0.34	0.33	4.914	0.396	-3.63333	3.12103e-125	2.62881e-123	--	PREDICTED: protein FAM179B [Drosophila miranda]	-	-	-	-	-	-	-
LOC105223616	10939	9939	11592	8546	9297	2205	3633	2181	2285	3002	224.7	241.45	237.94	200.8	223.53	57.51	70.42	63.5	58.77	67.62	225.684	63.564	-1.82802	1.05048e-124	8.71507e-123	TOMM70	PREDICTED: mitochondrial import receptor subunit TOM70 [Bactrocera dorsalis]	-	-	-	-	-	-	-
LOC105226868	12107	9943	9962	10724	9354	28103	33595	20360	25882	31268	390.33	379.34	321.01	395.54	352.87	1149.03	1020.3	928.11	1044.29	1104.85	367.818	1049.32	1.51239	1.44666e-124	1.19123e-122	betaTub56D	beta-Tubulin at 56D, isoform B [Drosophila melanogaster]	Cellular Processes;Cellular Processes;Human Diseases	Transport and catabolism;Cellular community - eukaryotes;Infectious diseases	ko04145//Phagosome;ko04540//Gap junction;ko05130//Pathogenic Escherichia coli infection	K07375;K07375;K07375	-	-	-
LOC105231207	1161	951	1132	982	945	1835	2495	1592	1982	2304	30.54	29.61	29.76	29.56	29.09	61.22	61.83	59.22	65.25	66.43	29.712	62.79	1.07949	7.98373e-124	6.52537e-122	erlec1	PREDICTED: endoplasmic reticulum lectin 1 [Bactrocera dorsalis]	Genetic Information Processing	Folding, sorting and degradation	ko04141//Protein processing in endoplasmic reticulum	K14008	-	-	-
LOC105233600	402	326	413	350	345	811	1174	679	834	946	9.99	9.59	10.26	9.95	10.03	25.56	27.48	23.86	25.94	25.76	9.964	25.72	1.36809	3.29522e-123	2.67349e-121	-	-	-	-	-	-	-	-	-
LOC105229138	15	4	15	13	7	384	494	366	327	499	0.48	0.16	0.44	0.43	0.25	14.11	13.75	15	11.92	15.85	0.352	14.126	5.32663	6.63158e-122	5.34108e-120	slc17a8	PREDICTED: putative inorganic phosphate cotransporter isoform X1 [Bactrocera dorsalis]	-	-	-	-	-	-	-
LOC105225760	15	30	35	28	26	484	709	381	366	474	0.38	0.9	0.89	0.81	0.77	15.59	16.96	13.68	11.63	13.19	0.75	14.21	4.24387	1.09357e-120	8.74383e-119	ser3	PREDICTED: serine protease gd [Bactrocera dorsalis]	-	-	-	-	-	-	-
LOC105231842	597	516	589	395	530	3046	3105	2126	2372	2788	6.91	7.06	6.81	5.23	7.17	44.63	33.81	34.74	34.3	35.33	6.636	36.562	2.46196	1.81537e-120	1.44106e-118	FAAH2	PREDICTED: fatty-acid amide hydrolase 2 isoform X1 [Bactrocera dorsalis]	-	-	-	-	-	GO:0016810//hydrolase activity, acting on carbon-nitrogen (but not peptide) bonds;GO:0016879//ligase activity, forming carbon-nitrogen bonds	-
LOC105231488	639	637	674	623	552	1985	2738	1904	1771	2106	7.87	9.28	8.29	8.78	7.95	30.99	31.76	33.15	27.29	28.42	8.434	30.322	1.84608	3.40717e-120	2.68534e-118	-	-	-	-	-	-	-	-	-
LOC105227280	2202	1725	1957	1954	1618	568	731	483	573	684	18.15	16.82	16.12	18.42	15.6	5.94	5.68	5.63	5.91	6.18	17.022	5.868	-1.53646	1.21385e-119	9.49904e-118	l(2)k09022	PREDICTED: HEAT repeat-containing protein 1 homolog [Bactrocera dorsalis]	Genetic Information Processing	Translation	ko03008//Ribosome biogenesis in eukaryotes	K14550	-	-	-
LOC105226910	122	49	110	60	70	1285	1782	1108	881	1242	2.44	1.16	2.2	1.37	1.64	32.63	33.61	31.37	22.08	27.26	1.762	29.39	4.06004	1.29252e-119	1.00434e-117	GPCPD1	Glycerophosphocholine phosphodiesterase GPCPD1, partial [Bactrocera dorsalis]	-	-	-	-	-	GO:0030246//carbohydrate binding	-
LOC105228784	1295	1039	1179	1155	1027	1996	2694	1721	2121	2426	70.47	66.9	64.12	71.9	65.39	137.74	138.09	132.41	144.44	144.68	67.756	139.472	1.04155	1.52239e-119	1.16982e-117	-	-	-	-	-	-	-	-	-
LOC105232634	570	535	622	540	448	1678	2408	1377	1836	1674	8.65	9.64	9.5	9.46	7.98	32.73	34.77	29.95	35.36	28.09	9.046	32.18	1.83081	1.52668e-119	1.16982e-117	Ano1	PREDICTED: anoctamin-5 isoform X1 [Bactrocera dorsalis]	-	-	-	-	GO:0031224//intrinsic component of membrane	-	-
LOC105227917	837	700	805	703	612	1571	2080	1450	1692	1910	29.21	28.85	28.02	28.08	25.02	69.61	68.58	71.73	74.07	73.14	27.836	71.426	1.3595	1.11951e-118	8.51908e-117	Spn77Ba	PREDICTED: serine protease inhibitor 77Ba [Bactrocera dorsalis]	-	-	-	-	-	-	-
LOC105231281	2421	2064	2289	2746	2172	7636	9977	6967	7567	7979	73.9	74.55	69.83	95.89	77.57	295.59	286.88	300.68	289.06	266.93	78.348	287.828	1.87724	1.76971e-118	1.33747e-116	CG12262	PREDICTED: probable medium-chain specific acyl-CoA dehydrogenase, mitochondrial [Bactrocera dorsalis]	Metabolism;Metabolism;Metabolism;Metabolism;Organismal Systems;Metabolism;Metabolism;Metabolism	Global and overview maps;Global and overview maps;Global and overview maps;Lipid metabolism;Endocrine system;Amino acid metabolism;Carbohydrate metabolism;Metabolism of other amino acids	ko01100//Metabolic pathways;ko01200//Carbon metabolism;ko01212//Fatty acid metabolism;ko00071//Fatty acid degradation;ko03320//PPAR signaling pathway;ko00280//Valine, leucine and isoleucine degradation;ko00640//Propanoate metabolism;ko00410//beta-Alanine metabolism	K00249;K00249;K00249;K00249;K00249;K00249;K00249;K00249	-	GO:0000166//nucleotide binding;GO:0016491//oxidoreductase activity	GO:0044710//single-organism metabolic process
LOC105230785	846	662	698	681	716	2043	2907	2113	2350	2289	18.73	17.4	15.48	17.23	18.51	57.46	60.69	66.18	65.17	55.64	17.47	61.028	1.80459	2.90497e-118	2.1805e-116	DGAT1	PREDICTED: diacylglycerol O-acyltransferase 1 [Bactrocera dorsalis]	Metabolism;Metabolism;Metabolism;Organismal Systems	Global and overview maps;Lipid metabolism;Metabolism of cofactors and vitamins;Digestive system	ko01100//Metabolic pathways;ko00561//Glycerolipid metabolism;ko00830//Retinol metabolism;ko04975//Fat digestion and absorption	K11155;K11155;K11155;K11155	GO:0031090//organelle membrane;GO:0031224//intrinsic component of membrane;GO:0043231//intracellular membrane-bounded organelle	GO:0016747//transferase activity, transferring acyl groups other than amino-acyl groups	GO:0006641//triglyceride metabolic process
LOC105232220	153	118	114	127	108	678	867	675	569	798	8.3	7.57	6.18	7.88	6.86	46.64	44.31	51.77	38.63	47.44	7.358	45.758	2.63664	3.76906e-118	2.80999e-116	Cyp4ae1	PREDICTED: cytochrome P450 4ae1 [Bactrocera dorsalis]	-	-	-	-	-	GO:0016491//oxidoreductase activity;GO:0046906//tetrapyrrole binding	GO:0044710//single-organism metabolic process
LOC105230106	8926	7650	9010	7904	7897	1801	3201	1735	2347	2717	222.48	225.61	224.51	225.37	230.33	57.06	75.33	61.22	73.44	74.45	225.66	68.3	-1.72419	7.65632e-118	5.66979e-116	Pa2g4	PREDICTED: proliferation-associated protein 2G4 [Bactrocera dorsalis]	-	-	-	-	-	-	-
LOC105227294	2523	1748	1892	1854	1484	168	207	172	221	279	150.49	123.38	112.79	126.52	103.57	12.71	11.63	14.51	16.5	18.24	123.35	14.718	-3.0671	8.7606e-117	6.4443e-115	Obp99a	General odorant-binding protein 99a, partial [Bactrocera dorsalis]	-	-	-	-	-	-	-
LOC105233590	5365	4644	5968	4540	4981	1390	1871	1251	1284	1412	466.7	478.05	518.88	451.82	507	153.34	153.32	153.87	139.79	134.62	484.49	146.988	-1.72077	8.82712e-117	6.45023e-115	--	PREDICTED: sarcoplasmic calcium-binding protein, alpha-B and -A chains [Bactrocera dorsalis]	-	-	-	-	-	GO:0046872//metal ion binding	-
LOC105233940	3370	2961	3873	2542	2804	12983	17011	13236	12467	12720	99.72	103.69	114.54	86.06	97.09	487.22	474.2	553.81	461.72	412.56	100.22	477.902	2.25354	3.47132e-116	2.5199e-114	faah2b	PREDICTED: fatty-acid amide hydrolase 2-B [Bactrocera dorsalis]	-	-	-	-	-	GO:0016810//hydrolase activity, acting on carbon-nitrogen (but not peptide) bonds;GO:0016879//ligase activity, forming carbon-nitrogen bonds	-
LOC105223992	1264	1488	701	1098	958	5	12	6	6	13	19.05	26.53	10.56	18.93	16.89	0.1	0.17	0.13	0.11	0.21	18.392	0.144	-6.99687	4.68445e-116	3.37831e-114	-	-	-	-	-	-	-	-	-
LOC105229325	292	239	283	257	245	1066	1262	853	797	1049	7.89	7.15	7.08	7.64	7.44	34.81	31.49	31.61	25.9	29.59	7.44	30.68	2.04392	5.75505e-114	4.12346e-112	SLC17A5	PREDICTED: sialin [Bactrocera dorsalis]	-	-	-	-	-	-	GO:0044763//single-organism cellular process
LOC105225512	33636	30462	35693	32076	30690	98444	137472	100182	93938	96866	2498.1	2677.17	2649.48	2725.4	2667.01	9272.13	9617.86	10520.2	8731.24	7884.68	2643.43	9205.22	1.80004	1.88318e-113	1.34058e-111	EbpIII	PREDICTED: ejaculatory bulb-specific protein 3 [Bactrocera dorsalis]	-	-	-	-	-	-	-
LOC105232743	85	35	52	45	61	475	892	444	620	732	6.89	3.36	4.21	4.17	5.78	48.82	68.1	50.88	62.88	65.02	4.882	59.14	3.59859	2.23538e-113	1.5811e-111	Lcp65Ag2	PREDICTED: larval cuticle protein 8-like [Bactrocera dorsalis]	-	-	-	-	-	GO:0005214//structural constituent of chitin-based cuticle	GO:0042335//cuticle development
LOC105225756	923	767	631	806	627	2843	4200	2748	3014	3138	23.15	22.92	15.63	23.6	18.47	89.14	99.32	95.42	92.46	86.83	20.754	92.634	2.15815	3.15946e-113	2.22048e-111	Tret1	PREDICTED: facilitated trehalose transporter Tret1 isoform X1 [Bactrocera dorsalis]	-	-	-	-	GO:0031224//intrinsic component of membrane	GO:0022857//transmembrane transporter activity	GO:0044763//single-organism cellular process;GO:0051234//establishment of localization
LOC105223573	2287	1789	2083	2038	1790	679	825	550	666	697	34.26	31.71	31.18	34.92	31.37	12.9	11.64	11.65	12.48	11.44	32.688	12.022	-1.44308	8.01905e-113	5.60014e-111	RpI135	PREDICTED: DNA-directed RNA polymerase I subunit RPA2 [Bactrocera dorsalis]	Metabolism;Metabolism;Metabolism;Genetic Information Processing	Global and overview maps;Nucleotide metabolism;Nucleotide metabolism;Transcription	ko01100//Metabolic pathways;ko00230//Purine metabolism;ko00240//Pyrimidine metabolism;ko03020//RNA polymerase	K03002;K03002;K03002;K03002	GO:0044452//nucleolar part	GO:0001882//nucleoside binding;GO:0003676//nucleic acid binding;GO:0034062//RNA polymerase activity	GO:0006351//transcription, DNA-templated;GO:0030154//cell differentiation
LOC105229401	1468	1150	1272	1131	1169	179	376	193	245	253	28.48	26.4	24.66	25.1	26.53	4.4	6.87	5.29	5.95	5.38	26.234	5.578	-2.23362	1.46336e-112	1.01552e-110	GH22027	PREDICTED: ribosome biogenesis protein BOP1 homolog [Bactrocera dorsalis]	-	-	-	-	GO:0030684//preribosome;GO:0031981//nuclear lumen;GO:0043232//intracellular non-membrane-bounded organelle	GO:0005488//binding	GO:0000460//maturation of 5.8S rRNA
LOC105228721	521	449	457	464	444	75	100	54	76	78	8.64	8.81	7.58	8.8	8.62	1.58	1.56	1.27	1.58	1.42	8.49	1.482	-2.51822	6.10443e-112	4.20977e-110	pes	Protein croquemort [Bactrocera dorsalis]	-	-	-	-	GO:0031224//intrinsic component of membrane	-	-
LOC105225675	2570	2035	2109	2230	2159	417	412	292	420	485	27.22	25.5	22.32	27.02	26.76	5.6	4.11	4.37	5.57	5.63	25.764	5.056	-2.34929	1.68977e-111	1.15807e-109	-	-	-	-	-	-	-	-	-
LOC105230478	200	220	221	211	207	792	1371	795	772	998	1.72	2.24	1.9	2.08	2.08	8.64	11.1	9.66	8.31	9.4	2.004	9.422	2.23315	4.08037e-111	2.77919e-109	Npr1	PREDICTED: atrial natriuretic peptide receptor 1 isoform X1 [Bactrocera dorsalis]	Organismal Systems;Metabolism;Environmental Information Processing;Organismal Systems;Environmental Information Processing;Organismal Systems;Organismal Systems;Organismal Systems;Organismal Systems	Environmental adaptation;Nucleotide metabolism;Signal transduction;Endocrine system;Signal transduction;Circulatory system;Endocrine system;Endocrine system;Endocrine system	ko04714//Thermogenesis;ko00230//Purine metabolism;ko04024//cAMP signaling pathway;ko04921//Oxytocin signaling pathway;ko04022//cGMP - PKG signaling pathway;ko04270//Vascular smooth muscle contraction;ko04925//Aldosterone synthesis and secretion;ko04924//Renin secretion;ko04923//Regulation of lipolysis in adipocyte	K12323;K12323;K12323;K12323;K12323;K12323;K12323;K12323;K12323	GO:0031224//intrinsic component of membrane	GO:0009975//cyclase activity;GO:0016301//kinase activity;GO:0016829//lyase activity;GO:0032550//purine ribonucleoside binding	GO:0006464//cellular protein modification process;GO:0007165//signal transduction;GO:0009152//purine ribonucleotide biosynthetic process
LOC105224733	713	649	761	769	683	1787	2348	1629	1867	1943	45.18	48.69	48.26	55.79	50.66	143.72	140.23	146.01	148.12	135.04	49.716	142.624	1.52043	4.67629e-111	3.16553e-109	ORMDL	PREDICTED: ORM1-like protein [Bactrocera dorsalis]	-	-	-	-	GO:0031224//intrinsic component of membrane	-	-
LOC105231979	832	698	845	729	686	135	244	127	187	191	22.9	22.73	23.25	22.96	22.09	4.71	6.32	4.94	6.44	5.76	22.786	5.634	-2.01592	8.80794e-111	5.92602e-109	CG14230	PREDICTED: probable RNA-binding protein CG14230 [Bactrocera dorsalis]	-	-	-	-	-	-	-
LOC105228262	601	416	508	477	516	2031	3823	1737	1934	2345	8.46	6.85	7.08	7.63	8.37	35.92	49.99	33.92	33.62	35.92	7.678	37.874	2.30241	1.26772e-110	8.47761e-109	ADAMTS12	PREDICTED: A disintegrin and metalloproteinase with thrombospondin motifs 12 isoform X1 [Bactrocera dorsalis]	-	-	-	-	GO:0031012//extracellular matrix	GO:0016787//hydrolase activity	-
LOC105229986	5982	4875	5953	5379	5243	1615	2701	1471	1856	2277	328.31	316.57	326.64	337.54	336.64	112.51	139.76	114.05	127.4	137	329.14	126.144	-1.38363	2.43255e-110	1.61691e-108	Nsa2	PREDICTED: ribosome biogenesis protein NSA2 homolog [Bactrocera dorsalis]	-	-	-	-	-	-	GO:0030154//cell differentiation
LOC105230275	675	526	669	544	537	127	175	109	111	138	32.37	29.85	32.06	29.84	30.13	7.72	7.91	7.39	6.66	7.25	30.85	7.386	-2.06241	2.98676e-110	1.97341e-108	CG3817	PREDICTED: RRP15-like protein [Bactrocera dorsalis]	-	-	-	-	-	-	-
LOC105224588	807	672	736	648	688	3570	5300	3216	5452	6825	32.07	31.6	29.25	29.44	31.99	179.9	198.38	180.67	271.11	297.22	30.87	225.456	2.86857	9.02889e-110	5.93004e-108	AKR1A1	PREDICTED: alcohol dehydrogenase [NADP(+)] [Bactrocera dorsalis]	Metabolism;Metabolism;Metabolism;Metabolism	Global and overview maps;Carbohydrate metabolism;Carbohydrate metabolism;Lipid metabolism	ko01100//Metabolic pathways;ko00010//Glycolysis / Gluconeogenesis;ko00040//Pentose and glucuronate interconversions;ko00561//Glycerolipid metabolism	K00002;K00002;K00002;K00002	-	-	-
LOC105231188	740	559	655	630	631	102	162	108	136	119	14.28	12.77	12.64	13.91	14.24	2.5	2.95	2.96	3.28	2.52	13.568	2.842	-2.25523	2.87506e-109	1.87712e-107	CG10341	PREDICTED: H/ACA ribonucleoprotein complex non-core subunit NAF1 isoform X1 [Bactrocera dorsalis]	-	-	-	-	GO:0032991//macromolecular complex;GO:0044423//virion part	-	GO:0022613//ribonucleoprotein complex biogenesis
LOC105224742	809	687	809	732	774	94	200	116	112	141	20.94	21.04	20.93	21.68	23.44	3.09	4.88	4.25	3.63	4	21.606	3.97	-2.44422	6.99923e-109	4.54291e-107	RIOK1	PREDICTED: LOW QUALITY PROTEIN: serine/threonine-protein kinase RIO1 [Bactrocera dorsalis]	Genetic Information Processing	Translation	ko03008//Ribosome biogenesis in eukaryotes	K07178	-	GO:0004672//protein kinase activity;GO:0032550//purine ribonucleoside binding	GO:0006464//cellular protein modification process;GO:0006796//phosphate-containing compound metabolic process
LOC105224868	1632	1300	1449	1449	1284	379	523	344	446	512	23.6	22.25	20.95	23.98	21.73	6.95	7.13	7.03	8.07	8.12	22.502	7.46	-1.59281	3.23438e-108	2.08703e-106	BMS1	PREDICTED: ribosome biogenesis protein BMS1 homolog [Bactrocera dorsalis]	Genetic Information Processing	Translation	ko03008//Ribosome biogenesis in eukaryotes	K14569	-	-	GO:0022613//ribonucleoprotein complex biogenesis
LOC105230567	2207	1761	1981	1944	1801	634	784	499	621	786	38.61	36.46	34.64	38.91	36.87	14.07	12.92	12.34	13.6	15.07	37.098	13.6	-1.44773	4.32513e-108	2.77462e-106	aub	PREDICTED: protein aubergine [Bactrocera dorsalis]	Organismal Systems	Development	ko04320//Dorso-ventral axis formation	K02156	-	-	-
LOC105223121	9	7	15	8	2	335	492	366	362	354	0.25	0.23	0.42	0.26	0.07	11.93	13.01	14.53	12.72	10.89	0.246	12.616	5.68045	1.37409e-107	8.76399e-106	Gr66a	gustatory receptor 28b, isoform B [Drosophila melanogaster]	-	-	-	-	GO:0031224//intrinsic component of membrane	GO:0004930//G-protein coupled receptor activity	GO:0002376//immune system process;GO:0006582//melanin metabolic process;GO:0007165//signal transduction;GO:0007606//sensory perception of chemical stimulus;GO:0007610//behavior;GO:0009266//response to temperature stimulus;GO:0009617//response to bacterium;GO:0042331//phototaxis
LOC105230902	956	678	819	690	651	95	195	88	119	137	46.3	38.86	39.65	38.23	36.89	5.84	8.9	6.03	7.21	7.27	39.986	7.05	-2.5038	4.72976e-107	2.99932e-105	Surf6	PREDICTED: surfeit locus protein 6 homolog [Bactrocera dorsalis]	-	-	-	-	-	-	-
LOC105230828	1273	1205	1179	1495	1111	6332	7110	4620	4669	5791	43.29	48.49	40.07	58.17	44.21	273.09	227.78	222.15	198.72	215.85	46.846	227.518	2.27998	5.71149e-107	3.60118e-105	UGT2B13	PREDICTED: UDP-glucuronosyltransferase 2B13-like, partial [Bactrocera dorsalis]	Metabolism;Metabolism;Metabolism;Metabolism;Human Diseases;Metabolism;Organismal Systems;Metabolism;Metabolism;Metabolism;Metabolism	Global and overview maps;Xenobiotics biodegradation and metabolism;Xenobiotics biodegradation and metabolism;Xenobiotics biodegradation and metabolism;Cancers;Carbohydrate metabolism;Digestive system;Metabolism of cofactors and vitamins;Metabolism of cofactors and vitamins;Carbohydrate metabolism;Lipid metabolism	ko01100//Metabolic pathways;ko00983//Drug metabolism - other enzymes;ko00980//Metabolism of xenobiotics by cytochrome P450;ko00982//Drug metabolism - cytochrome P450;ko05204//Chemical carcinogenesis;ko00040//Pentose and glucuronate interconversions;ko04976//Bile secretion;ko00860//Porphyrin and chlorophyll metabolism;ko00830//Retinol metabolism;ko00053//Ascorbate and aldarate metabolism;ko00140//…	K00699;K00699;K00699;K00699;K00699;K00699;K00699;K00699;K00699;K00699;K00699	-	GO:0016757//transferase activity, transferring glycosyl groups	-
LOC105227172	78	64	67	54	79	654	705	452	557	911	0.34	0.33	0.29	0.27	0.4	3.63	2.91	2.8	3.05	4.37	0.326	3.352	3.36208	6.84258e-107	4.28983e-105	SSPO	PREDICTED: hemocytin [Bactrocera dorsalis]	Human Diseases;Environmental Information Processing;Cellular Processes;Organismal Systems;Environmental Information Processing;Organismal Systems	Infectious diseases;Signal transduction;Cellular community - eukaryotes;Immune system;Signaling molecules and interaction;Immune system	ko05165//Human papillomavirus infection;ko04151//PI3K-Akt signaling pathway;ko04510//Focal adhesion;ko04611//Platelet activation;ko04512//ECM-receptor interaction;ko04610//Complement and coagulation cascades	K03900;K03900;K03900;K03900;K03900;K03900	-	-	-
LOC105230569	2973	2268	2274	2284	2253	391	676	297	320	464	39.55	36.41	31.23	35.02	36.04	6.2	7.68	5.72	4.98	6.22	35.65	6.16	-2.5329	8.41337e-107	5.24481e-105	Sesn	PREDICTED: sestrin homolog isoform X1 [Bactrocera dorsalis]	-	-	-	-	-	-	-
LOC105234052	765	626	697	656	608	149	226	134	185	181	18.24	17.67	16.61	17.9	16.97	4.51	5.08	4.52	5.52	4.73	17.478	4.872	-1.84295	3.56635e-106	2.19838e-104	Nle	PREDICTED: protein Notchless [Bactrocera dorsalis]	-	-	-	-	-	-	-
LOC105222287	4	8	5	6	7	4373	7718	3256	10432	14660	0.26	0.61	0.32	0.44	0.53	358.89	470.51	297.93	844.89	1039.79	0.432	602.402	10.4455	1.05313e-105	6.45566e-104	--	hypothetical protein, partial [Bactrocera dorsalis]	-	-	-	-	-	-	-
LOC105232733	46	28	40	39	41	641	816	358	505	442	3.4	2.45	2.96	3.3	3.55	60.12	56.85	37.44	46.74	35.83	3.132	47.396	3.91961	3.79596e-105	2.31407e-103	Lcp65Ag2	PREDICTED: larval cuticle protein 8-like [Bactrocera dorsalis]	-	-	-	-	-	GO:0005214//structural constituent of chitin-based cuticle	GO:0042335//cuticle development
LOC105226786	960	879	1033	946	833	250	370	209	268	312	38.32	41.52	41.21	43.2	38.9	12.65	13.91	11.79	13.39	13.65	40.63	13.078	-1.6354	1.18048e-103	7.15681e-102	--	PREDICTED: DNA-directed RNA polymerase I subunit rpa49 [Musca domestica]	Metabolism;Metabolism;Metabolism;Genetic Information Processing	Global and overview maps;Nucleotide metabolism;Nucleotide metabolism;Transcription	ko01100//Metabolic pathways;ko00230//Purine metabolism;ko00240//Pyrimidine metabolism;ko03020//RNA polymerase	K03005;K03005;K03005;K03005	-	-	-
LOC105226009	467	479	550	508	438	1390	2004	1020	1328	1542	11.5	13.95	13.53	14.31	12.62	43.4	46.48	35.51	40.92	41.61	13.182	41.584	1.65746	1.42964e-103	8.62e-102	FAAH2	PREDICTED: fatty-acid amide hydrolase 2 [Bactrocera dorsalis]	-	-	-	-	GO:0043232//intracellular non-membrane-bounded organelle	GO:0016810//hydrolase activity, acting on carbon-nitrogen (but not peptide) bonds;GO:0016879//ligase activity, forming carbon-nitrogen bonds	-
LOC105231918	1065	936	1011	1060	967	2569	3381	2119	2839	3588	20.44	21.26	19.4	23.28	21.72	62.54	61.14	57.51	68.2	75.48	21.22	64.974	1.61444	9.11111e-103	5.4637e-101	GFPT2	PREDICTED: glutamine--fructose-6-phosphate aminotransferase [isomerizing] 2 [Bactrocera dorsalis]	Metabolism;Human Diseases;Metabolism;Metabolism	Global and overview maps;Endocrine and metabolic diseases;Carbohydrate metabolism;Amino acid metabolism	ko01100//Metabolic pathways;ko04931//Insulin resistance;ko00520//Amino sugar and nucleotide sugar metabolism;ko00250//Alanine, aspartate and glutamate metabolism	K00820;K00820;K00820;K00820	-	GO:0005488//binding;GO:0016769//transferase activity, transferring nitrogenous groups	GO:0044238//primary metabolic process;GO:0044711//single-organism biosynthetic process;GO:1901135//carbohydrate derivative metabolic process
LOC105226175	1908	1414	1964	1782	1528	4771	5964	3870	4040	4568	22.82	19.8	23.16	24.41	21.74	73.39	67.12	65.56	60.6	59.71	22.386	65.276	1.54396	1.29433e-102	7.71983e-101	svr	PREDICTED: carboxypeptidase D isoform X1 [Bactrocera dorsalis]	-	-	-	-	-	-	-
LOC105225297	791	688	820	798	694	73	116	71	124	135	23.99	24.7	24.86	27.69	24.63	2.81	3.31	3.05	4.71	4.49	25.174	3.674	-2.77651	1.95374e-102	1.15377e-100	Klhdc4	PREDICTED: kelch domain-containing protein 4 [Bactrocera dorsalis]	-	-	-	-	-	-	-
LOC105232223	477	293	417	362	355	1023	1437	796	1083	1221	15.75	11.4	13.45	13.74	13.78	43.21	44.85	37.52	44.93	44.42	13.624	42.986	1.65772	1.95536e-102	1.15377e-100	-	-	-	-	-	-	-	-	-
LOC105231170	1708	1470	1588	1533	1600	4636	5927	3461	3553	4952	18.88	19.24	17.55	19.39	20.69	65.05	61.79	54.15	49.2	60.07	19.15	58.052	1.6	4.38303e-102	2.57246e-100	CD109	PREDICTED: CD109 antigen isoform X8 [Bactrocera dorsalis]	-	-	-	-	GO:0044421//extracellular region part	-	GO:0010466//negative regulation of peptidase activity
LOC105227070	3806	3189	3330	3740	2998	8123	11210	6653	7616	8218	91.95	91.67	80.13	103.83	84.18	247.61	253.65	226.77	229.67	216.15	90.352	234.77	1.37762	7.18353e-102	4.17174e-100	Orct	PREDICTED: organic cation transporter protein [Bactrocera dorsalis]	-	-	-	-	GO:0031224//intrinsic component of membrane	GO:0005215//transporter activity	GO:0044763//single-organism cellular process
LOC105231760	731	597	763	518	506	1644	2467	1567	1673	2080	16.8	16.2	17.55	13.62	13.59	47.85	53.42	50.98	48.18	52.34	15.552	50.554	1.70073	1.41737e-101	8.18811e-100	P4HA1	PREDICTED: prolyl 4-hydroxylase subunit alpha-1 [Bactrocera dorsalis]	Metabolism;Metabolism	Global and overview maps;Amino acid metabolism	ko01100//Metabolic pathways;ko00330//Arginine and proline metabolism	K00472;K00472	GO:0043231//intracellular membrane-bounded organelle	GO:0016701//oxidoreductase activity, acting on single donors with incorporation of molecular oxygen;GO:0016705//oxidoreductase activity, acting on paired donors, with incorporation or reduction of molecular oxygen;GO:0019842//vitamin binding;GO:0046914//transition metal ion binding	GO:0018126//protein hydroxylation;GO:0044710//single-organism metabolic process
LOC105229546	697	635	689	664	652	137	186	142	154	169	34.38	37.07	33.97	37.47	37.63	8.57	8.64	9.9	9.51	9.14	36.104	9.152	-1.98	7.8555e-101	4.51446e-99	BUD23	PREDICTED: probable 18S rRNA (guanine-N(7))-methyltransferase [Bactrocera dorsalis]	-	-	-	-	-	GO:0016741//transferase activity, transferring one-carbon groups	GO:0008152//metabolic process;GO:0030154//cell differentiation
LOC105229076	365	362	389	332	358	1265	1659	1314	1265	1299	15.49	18.19	16.48	16.11	17.77	68.04	66.3	78.81	67.17	60.39	16.808	68.142	2.0194	2.51041e-100	1.43523e-98	--	CG6310 [Drosophila melanogaster]	-	-	-	-	-	-	-
LOC105232625	74	85	64	48	94	589	883	549	593	611	1.22	1.68	1.1	0.98	1.86	12.64	13.85	12.73	11.88	11.29	1.368	12.478	3.18925	3.28139e-100	1.86633e-98	Gbs-76A	PREDICTED: glycogen-binding subunit 76A [Bactrocera dorsalis]	Organismal Systems;Human Diseases	Endocrine system;Endocrine and metabolic diseases	ko04910//Insulin signaling pathway;ko04931//Insulin resistance	K07189;K07189	-	-	-
LOC105232916	87	84	119	81	81	543	959	428	497	580	0.97	1.11	1.32	1.05	1.07	7.72	10.1	6.79	7.02	7.11	1.104	7.748	2.81108	2.41098e-99	1.36424e-97	Kr-h1	PREDICTED: Krueppel homolog 1 isoform X1 [Bactrocera dorsalis]	-	-	-	-	-	GO:0043169//cation binding	GO:0010975//regulation of neuron projection development;GO:0036314//response to sterol;GO:0042480//negative regulation of eye photoreceptor cell development
LOC105232506	977	713	802	723	758	92	196	120	134	165	46.27	39.96	37.96	39.17	42	5.53	8.74	8.04	7.94	8.56	41.072	7.762	-2.40365	7.37853e-99	4.15381e-97	CG1542	PREDICTED: probable rRNA-processing protein EBP2 homolog [Bactrocera dorsalis]	-	-	-	-	-	-	-
LOC105228960	1078	991	898	1047	879	2319	3306	2091	2395	2603	28.69	30.82	23.88	32.38	27.18	78.22	82.71	77.61	79.4	75.63	28.59	78.714	1.46111	7.19256e-98	4.02857e-96	Aldh3b1	PREDICTED: aldehyde dehydrogenase, dimeric NADP-preferring isoform X3 [Bactrocera dorsalis]	-	-	-	-	-	GO:0016903//oxidoreductase activity, acting on the aldehyde or oxo group of donors	GO:0044710//single-organism metabolic process
LOC105228753	32	20	16	24	22	491	668	594	612	388	1.13	0.83	0.56	0.95	0.89	20.21	20.02	26.81	24.68	13.79	0.872	21.102	4.59691	9.70597e-98	5.40887e-96	Rerg	PREDICTED: ras-related and estrogen-regulated growth inhibitor isoform X1 [Bactrocera dorsalis]	-	-	-	-	GO:0044464//cell part	GO:0032550//purine ribonucleoside binding	GO:0008104//protein localization;GO:0035556//intracellular signal transduction
LOC105230216	1813	1653	2012	1726	1831	4529	5779	4011	3933	4775	32.82	35.41	36.4	35.74	38.78	103.96	98.54	102.65	89.09	94.73	35.83	97.794	1.44858	1.37155e-97	7.60485e-96	Neurochondrin	PREDICTED: neurochondrin homolog [Bactrocera dorsalis]	-	-	-	-	GO:0043005//neuron projection;GO:0044297//cell body	-	GO:0003008//system process
LOC105232276	191	202	204	216	196	796	895	560	711	849	3.91	4.89	4.17	5.05	4.69	20.65	17.25	16.2	18.2	19.03	4.542	18.266	2.00776	1.419e-97	7.82861e-96	Acer	PREDICTED: angiotensin-converting enzyme-related protein [Bactrocera dorsalis]	Human Diseases;Organismal Systems;Human Diseases;Organismal Systems	Infectious diseases;Endocrine system;Cardiovascular diseases;Endocrine system	ko05142//Chagas disease (American trypanosomiasis);ko04924//Renin secretion;ko05410//Hypertrophic cardiomyopathy (HCM);ko04614//Renin-angiotensin system	K01283;K01283;K01283;K01283	-	GO:0008238//exopeptidase activity;GO:0043169//cation binding	GO:0019538//protein metabolic process
LOC105229899	1218	1058	1087	1105	978	336	481	290	332	412	21.35	21.95	19.04	22.16	20.06	7.47	7.94	7.19	7.28	7.92	20.912	7.56	-1.46787	2.90585e-96	1.59518e-94	WDR36	PREDICTED: WD repeat-containing protein 36 [Bactrocera dorsalis]	Genetic Information Processing	Translation	ko03008//Ribosome biogenesis in eukaryotes	K14554	GO:0030684//preribosome	-	-
LOC105222790	183	132	100	146	105	728	1447	713	997	1029	7.73	6.6	4.22	7.06	5.19	39.01	57.61	42.58	52.72	47.65	6.16	47.914	2.95945	3.82429e-96	2.08897e-94	Spr	PREDICTED: sepiapterin reductase [Bactrocera dorsalis]	Metabolism;Metabolism	Global and overview maps;Metabolism of cofactors and vitamins	ko01100//Metabolic pathways;ko00790//Folate biosynthesis	K00072;K00072	-	GO:0016616//oxidoreductase activity, acting on the CH-OH group of donors, NAD or NADP as acceptor	GO:0008152//metabolic process
LOC105234219	838	636	750	661	642	103	210	85	121	121	10.08	9.06	9.02	9.1	9.04	1.57	2.38	1.45	1.82	1.6	9.26	1.764	-2.39216	3.84692e-96	2.09098e-94	--	GM19038 [Drosophila sechellia]	-	-	-	-	-	-	-
LOC105224943	1268	1129	1442	1221	1194	348	419	293	363	354	16.23	17.1	18.45	17.88	17.88	5.65	5.05	5.3	5.81	4.97	17.508	5.356	-1.70879	1.92537e-95	1.0414e-93	-	-	-	-	-	-	-	-	-
LOC105228146	1293	1064	1220	1095	1088	2074	2779	1869	2294	2296	59.34	57.65	56.09	57.28	58.39	120.65	120.45	120.92	131.67	115.58	57.75	121.854	1.07726	3.47799e-95	1.87201e-93	Efr	PREDICTED: UDP-xylose and UDP-N-acetylglucosamine transporter isoform X2 [Bactrocera dorsalis]	-	-	-	-	GO:0031224//intrinsic component of membrane;GO:0043231//intracellular membrane-bounded organelle	GO:0008514//organic anion transmembrane transporter activity;GO:0015165//pyrimidine nucleotide-sugar transmembrane transporter activity;GO:0036080//purine nucleotide-sugar transmembrane transporter activity	GO:0006493//protein O-linked glycosylation;GO:0015711//organic anion transport;GO:0015781//pyrimidine nucleotide-sugar transport;GO:0015783//GDP-fucose transport;GO:0030166//proteoglycan biosynthetic process
LOC105233027	10555	9321	11900	9633	9635	3867	5179	3053	4033	4621	246.82	257.92	278.13	257.71	263.62	114.69	114.08	100.94	118.03	118.43	260.84	113.234	-1.20386	4.97242e-95	2.66338e-93	ybx1	PREDICTED: Y-box factor homolog isoform X1 [Bactrocera dorsalis]	-	-	-	-	-	-	-
LOC105226321	144	105	167	114	98	499	824	485	478	634	7.2	6.21	8.34	6.52	5.73	31.63	38.79	34.27	29.9	34.73	6.8	33.864	2.31615	1.05728e-94	5.63578e-93	--	PREDICTED: kunitz/BPTI-like toxin [Bactrocera dorsalis]	-	-	-	-	-	-	-
LOC105224399	699	534	654	548	511	116	182	92	138	160	26.05	23.55	24.36	23.36	22.28	5.48	6.39	4.85	6.44	6.53	23.92	5.938	-2.01017	2.68729e-94	1.42556e-92	CG6712	PREDICTED: probable ribosome production factor 1 [Bactrocera dorsalis]	-	-	-	-	-	-	-
LOC105228097	57876	54770	64752	48140	49791	15048	19708	14692	14307	18322	1234.38	1381.98	1379.96	1174.63	1242.35	408.08	397	444.23	382.59	429.31	1282.66	412.242	-1.63758	2.72906e-94	1.44078e-92	Pgi	PREDICTED: glucose-6-phosphate isomerase [Bactrocera dorsalis]	Metabolism;Metabolism;Metabolism;Metabolism;Metabolism;Metabolism	Global and overview maps;Global and overview maps;Carbohydrate metabolism;Carbohydrate metabolism;Carbohydrate metabolism;Carbohydrate metabolism	ko01100//Metabolic pathways;ko01200//Carbon metabolism;ko00010//Glycolysis / Gluconeogenesis;ko00520//Amino sugar and nucleotide sugar metabolism;ko00500//Starch and sucrose metabolism;ko00030//Pentose phosphate pathway	K01810;K01810;K01810;K01810;K01810;K01810	GO:0043232//intracellular non-membrane-bounded organelle	GO:0016861//intramolecular oxidoreductase activity, interconverting aldoses and ketoses	GO:0006006//glucose metabolic process;GO:0006090//pyruvate metabolic process
LOC105225046	748	712	834	751	717	164	263	142	167	169	21.27	23.96	23.71	24.44	23.86	5.92	7.05	5.71	5.94	5.27	23.448	5.978	-1.97173	3.57557e-94	1.87871e-92	--	PREDICTED: UPF0687 protein C20orf27 homolog [Bactrocera dorsalis]	-	-	-	-	-	-	-
LOC105224853	418	349	448	373	295	1253	1654	1383	1452	1874	9.94	9.82	10.64	10.15	8.21	37.82	37.1	46.55	43.26	48.85	9.752	42.716	2.13101	7.25381e-94	3.79329e-92	mthl9	PREDICTED: probable G-protein coupled receptor Mth-like 9 isoform X1 [Bactrocera dorsalis]	-	-	-	-	-	-	-
LOC105222377	943	858	1050	823	837	233	279	157	180	260	11.82	12.73	13.16	11.79	12.29	3.71	3.3	2.79	2.82	3.58	12.358	3.24	-1.93138	1.88724e-92	9.82257e-91	SLC7A5	PREDICTED: large neutral amino acids transporter small subunit 1 [Bactrocera dorsalis]	-	-	-	-	GO:0031224//intrinsic component of membrane	GO:0046943//carboxylic acid transmembrane transporter activity	-
LOC105231812	156	106	159	164	128	513	647	474	503	609	2.94	2.36	2.99	3.53	2.82	12.25	11.48	12.62	11.85	12.57	2.928	12.154	2.05344	2.15807e-92	1.11794e-90	MANBA	PREDICTED: beta-mannosidase [Bactrocera dorsalis]	Cellular Processes;Metabolism	Transport and catabolism;Glycan biosynthesis and metabolism	ko04142//Lysosome;ko00511//Other glycan degradation	K01192;K01192	-	GO:0015923//mannosidase activity	GO:0010412//mannan metabolic process
LOC105233910	335	705	397	539	402	18703	23506	20798	17085	18235	6.33	15.78	7.5	11.66	8.89	448.52	418.71	556.07	404.32	377.91	10.032	441.106	5.45844	3.0157e-92	1.55492e-90	Cyp4c3	PREDICTED: cytochrome P450 4c3 [Bactrocera dorsalis]	-	-	-	-	-	GO:0016491//oxidoreductase activity;GO:0046906//tetrapyrrole binding;GO:0046914//transition metal ion binding	GO:0030908//protein splicing;GO:0044710//single-organism metabolic process
LOC105229147	1237	989	1162	1054	1064	241	414	193	244	354	19.67	19.26	18.89	19.03	20.19	4.87	6.26	4.42	5.1	6.33	19.408	5.396	-1.84669	4.49715e-92	2.30798e-90	Mtmr14	PREDICTED: myotubularin-related protein 14 [Bactrocera dorsalis]	Metabolism;Cellular Processes;Environmental Information Processing;Metabolism	Global and overview maps;Transport and catabolism;Signal transduction;Carbohydrate metabolism	ko01100//Metabolic pathways;ko04140//Autophagy - animal;ko04070//Phosphatidylinositol signaling system;ko00562//Inositol phosphate metabolism	K18086;K18086;K18086;K18086	-	GO:0042578//phosphoric ester hydrolase activity	GO:0006470//protein dephosphorylation
LOC105232068	1960	1595	1944	1774	1787	4532	4919	3486	4114	4548	37.46	36.98	37.85	39.83	40.4	114.39	91.37	97.51	101.41	98.87	38.504	100.71	1.38713	4.81095e-92	2.45759e-90	Rop	PREDICTED: protein ROP isoform X1 [Bactrocera dorsalis]	Organismal Systems	Nervous system	ko04721//Synaptic vesicle cycle	K15292	-	-	GO:0006810//transport
LOC105226005	1105	902	1023	989	905	106	226	111	163	223	47.63	46.01	44.08	48.78	45.65	5.79	9.18	6.77	8.79	10.54	46.43	8.214	-2.4989	1.29115e-91	6.56524e-90	Non3	PREDICTED: ribosome production factor 2 homolog [Bactrocera dorsalis]	-	-	-	-	-	-	-
LOC105230189	737	520	584	587	588	101	141	77	111	84	15.15	12.65	12	13.81	14.14	2.63	2.73	2.24	2.86	1.89	13.55	2.47	-2.45571	1.3736e-91	6.95241e-90	Ddx24	PREDICTED: ATP-dependent RNA helicase DDX24 [Bactrocera dorsalis]	-	-	-	-	-	GO:0003724//RNA helicase activity;GO:0032550//purine ribonucleoside binding	-
LOC105229058	487	376	376	377	382	1100	1423	952	970	1119	5	4.57	3.86	4.43	4.59	14.34	13.78	13.83	12.48	12.6	4.49	13.406	1.57809	1.59233e-91	8.02274e-90	-	-	-	-	-	-	-	-	-
LOC105225155	706	560	696	600	589	129	201	114	174	185	18.19	17.07	17.92	17.68	17.75	4.21	4.88	4.15	5.61	5.22	17.722	4.814	-1.88023	2.24736e-91	1.12715e-89	--	Protein LAS1 [Ceratitis capitata]	-	-	-	-	-	-	-
LOC105225812	1763	1203	1572	1326	1652	4170	5281	3646	3892	4624	101.97	82.33	90.87	87.74	111.8	305.86	287.72	298.16	281.71	293.11	94.942	293.312	1.62732	8.05089e-91	4.01962e-89	GST1	PREDICTED: glutathione S-transferase 1-1-like [Bactrocera dorsalis]	Human Diseases;Human Diseases;Metabolism;Organismal Systems;Human Diseases;Human Diseases;Metabolism;Metabolism;Metabolism;Human Diseases;Human Diseases	Cancers;Cancers;Xenobiotics biodegradation and metabolism;Aging;Cardiovascular diseases;Cancers;Xenobiotics biodegradation and metabolism;Metabolism of other amino acids;Xenobiotics biodegradation and metabolism;Cancers;Drug resistance	ko05200//Pathways in cancer;ko05225//Hepatocellular carcinoma;ko00983//Drug metabolism - other enzymes;ko04212//Longevity regulating pathway - worm;ko05418//Fluid shear stress and atherosclerosis;ko05215//Prostate cancer;ko00980//Metabolism of xenobiotics by cytochrome P450;ko00480//Glutathione metabolism;ko00982//Drug metabolism - cytochrome P450;ko05204//Chemical carcinogenesis;ko01524//Platinu…	K00799;K00799;K00799;K00799;K00799;K00799;K00799;K00799;K00799;K00799;K00799	-	GO:0016765//transferase activity, transferring alkyl or aryl (other than methyl) groups	-
LOC105226122	509	384	413	409	376	1093	1301	872	1072	1088	1.64	1.47	1.33	1.51	1.42	4.47	3.95	3.98	4.33	3.85	1.474	4.116	1.48151	9.68661e-91	4.8145e-89	HERC2	PREDICTED: probable E3 ubiquitin-protein ligase HERC2 [Bactrocera dorsalis]	Genetic Information Processing	Folding, sorting and degradation	ko04120//Ubiquitin mediated proteolysis	K10595	-	GO:0003824//catalytic activity;GO:0043169//cation binding;GO:0046906//tetrapyrrole binding	GO:0032446//protein modification by small protein conjugation
LOC105222643	794	593	970	802	631	39	37	61	47	48	48.67	43.01	59.42	56.24	45.25	3.03	2.14	5.29	3.61	3.22	50.518	3.458	-3.86879	1.05625e-90	5.2263e-89	--	PREDICTED: uncharacterized protein LOC105222643 [Bactrocera dorsalis]	-	-	-	-	-	-	-
LOC105231763	5018	4620	5269	4477	4500	2011	2607	1708	1899	2174	86.86	94.97	90.84	88.67	90.65	44.96	43.43	42.75	41.46	42.06	90.398	42.932	-1.07424	1.70979e-90	8.42226e-89	aralar1	PREDICTED: calcium-binding mitochondrial carrier protein Aralar1 isoform X1 [Bactrocera dorsalis]	-	-	-	-	-	-	-
LOC105223748	1556	1271	1395	1239	1243	470	658	354	488	556	36.36	35.15	32.58	33.12	33.99	13.93	14.48	11.7	14.27	14.24	34.24	13.724	-1.31898	1.90213e-90	9.32806e-89	--	PREDICTED: HEAT repeat-containing protein 3 [Bactrocera dorsalis]	-	-	-	-	-	-	-
LOC105231888	2210	1851	2324	2120	1821	4825	5790	4632	4634	5540	74.27	75.56	81.39	84.62	75.52	207.41	185.57	228.24	201.04	208.45	78.272	206.142	1.39707	2.18302e-90	1.06582e-88	--	PREDICTED: peroxisomal membrane protein 11C isoform X1 [Bactrocera dorsalis]	Cellular Processes	Transport and catabolism	ko04146//Peroxisome	K13353	-	-	GO:0007031//peroxisome organization
LOC105223140	556	454	537	470	455	1096	1480	900	994	1086	18.3	17.68	17.67	17.7	17.52	45.75	45.89	41.89	40.95	39.18	17.774	42.732	1.26555	2.67706e-90	1.30126e-88	-	-	-	-	-	-	-	-	-
LOC105225517	1445	1176	1409	1319	1259	323	554	354	427	443	50.73	48.85	49.44	52.97	51.72	14.38	18.32	17.57	18.76	17.04	50.742	17.214	-1.5596	7.07179e-90	3.42238e-88	NOB1	PREDICTED: RNA-binding protein NOB1 [Bactrocera dorsalis]	Genetic Information Processing	Translation	ko03008//Ribosome biogenesis in eukaryotes	K11883	-	-	GO:0030154//cell differentiation;GO:0033554//cellular response to stress;GO:0042254//ribosome biogenesis
LOC105223445	8629	7178	7830	7272	7325	2682	4323	2292	3027	3562	117.56	115.85	106.42	113.26	117.01	46.42	55.39	44.17	51.39	53.27	114.02	50.128	-1.1856	9.59136e-90	4.60135e-88	HSPH1	PREDICTED: heat shock 70 kDa protein 4 isoform X1 [Bactrocera dorsalis]	Genetic Information Processing	Folding, sorting and degradation	ko04141//Protein processing in endoplasmic reticulum	K09485	-	-	-
LOC105231837	345	301	387	332	315	709	957	623	706	842	13.18	13.61	14.77	14.51	14.08	34.35	34.44	33.65	33.75	35.25	14.03	34.288	1.28919	1.03696e-89	4.95314e-88	-	-	-	-	-	-	-	-	-
LOC105232551	1014	929	1106	940	978	231	294	168	272	291	33.65	36.48	36.68	35.69	37.97	9.72	9.19	7.88	11.3	10.58	36.094	9.734	-1.89065	1.91538e-89	9.10962e-88	DPH5	PREDICTED: diphthine methyl ester synthase [Bactrocera dorsalis]	-	-	-	-	-	GO:0016741//transferase activity, transferring one-carbon groups	GO:0017182//peptidyl-diphthamide metabolic process
LOC105231405	1118	1061	1048	1232	985	3723	4837	2547	3042	3511	38.89	43.67	36.44	49.03	40.1	164.28	158.54	125.29	132.52	133.93	41.626	142.912	1.77957	1.305e-88	6.15356e-87	ImpL3	PREDICTED: L-lactate dehydrogenase isoform X1 [Bactrocera dorsalis]	Metabolism;Environmental Information Processing;Organismal Systems;Metabolism;Metabolism;Human Diseases;Metabolism;Metabolism	Global and overview maps;Signal transduction;Endocrine system;Carbohydrate metabolism;Carbohydrate metabolism;Cancers;Amino acid metabolism;Carbohydrate metabolism	ko01100//Metabolic pathways;ko04066//HIF-1 signaling pathway;ko04922//Glucagon signaling pathway;ko00010//Glycolysis / Gluconeogenesis;ko00620//Pyruvate metabolism;ko05230//Central carbon metabolism in cancer;ko00270//Cysteine and methionine metabolism;ko00640//Propanoate metabolism	K00016;K00016;K00016;K00016;K00016;K00016;K00016;K00016	GO:0044424//intracellular part	GO:0004457//lactate dehydrogenase activity	GO:0005975//carbohydrate metabolic process;GO:0044710//single-organism metabolic process
LOC105228157	1364	1174	1356	1025	1256	3236	5621	2691	3280	3732	20.73	21.09	20.57	17.81	22.34	62.5	80.62	57.91	62.49	62.26	20.508	65.156	1.66771	2.04095e-88	9.58291e-87	SLC12A6	PREDICTED: solute carrier family 12 member 6 isoform X1 [Bactrocera dorsalis]	Organismal Systems	Nervous system	ko04727//GABAergic synapse	K14427	-	-	-
LOC105228794	537	437	434	424	394	77	122	62	72	90	32.65	31.44	26.37	29.49	28.03	5.94	6.99	5.33	5.48	6	29.596	5.948	-2.31493	4.1459e-88	1.93306e-86	--	PREDICTED: coiled-coil domain-containing protein 86 [Bactrocera dorsalis]	-	-	-	-	-	-	-
LOC105229770	18417	16308	18598	17387	16001	34826	42419	32772	33398	39082	891.44	934.37	899.93	963.23	905.86	2137.99	1935.2	2242.06	2024.78	2074.24	918.966	2082.85	1.18048	4.15202e-88	1.93306e-86	Cyp1	PREDICTED: peptidyl-prolyl cis-trans isomerase-like isoform X1 [Bactrocera dorsalis]	Human Diseases;Human Diseases;Environmental Information Processing;Environmental Information Processing;Human Diseases	Neurodegenerative diseases;Neurodegenerative diseases;Signal transduction;Signal transduction;Infectious diseases	ko05016//Huntington disease;ko05012//Parkinson disease;ko04020//Calcium signaling pathway;ko04022//cGMP - PKG signaling pathway;ko05145//Toxoplasmosis	K09565;K09565;K09565;K09565;K09565	-	GO:0016859//cis-trans isomerase activity	GO:0044267//cellular protein metabolic process
LOC105232432	71	47	95	152	102	19603	38456	13248	46063	63978	3.55	2.78	4.75	8.69	5.96	1242.43	1810.46	936.15	2881.02	3504.32	5.146	2074.88	8.65536	5.38507e-88	2.49659e-86	--	PREDICTED: circadian clock-controlled protein [Bactrocera dorsalis]	-	-	-	-	-	-	-
LOC105233817	449	374	498	377	387	1033	1376	1007	1035	1112	7.52	7.41	8.33	7.22	7.58	21.93	21.7	23.83	21.68	20.4	7.612	21.908	1.52511	7.57117e-88	3.49541e-86	SPON1	PREDICTED: LOW QUALITY PROTEIN: spondin-1 [Bactrocera dorsalis]	-	-	-	-	-	-	GO:0010466//negative regulation of peptidase activity
LOC105224427	2225	1825	1948	1956	1856	3415	4621	2739	3654	4297	86.64	84.11	75.83	87.15	84.58	168.7	169.53	150.83	178.12	183.44	83.662	170.124	1.02394	9.99276e-88	4.59417e-86	BCAP31	PREDICTED: B-cell receptor-associated protein 31 [Bactrocera dorsalis]	Human Diseases;Genetic Information Processing	Infectious diseases;Folding, sorting and degradation	ko05165//Human papillomavirus infection;ko04141//Protein processing in endoplasmic reticulum	K14009;K14009	GO:0031224//intrinsic component of membrane	-	GO:0015031//protein transport
LOC105226694	4457	3983	4156	3696	3753	7978	12179	7321	7795	8364	101.31	107.13	94.42	96.11	99.82	229.98	260.78	235.29	221.74	208.36	99.758	231.23	1.21282	5.9227e-87	2.71166e-85	wat	RE14390p, partial [Drosophila melanogaster]	-	-	-	-	-	GO:0016620//oxidoreductase activity, acting on the aldehyde or oxo group of donors, NAD or NADP as acceptor	-
LOC105234146	369	383	414	338	341	995	1425	909	1069	1004	9.49	11.66	10.64	9.95	10.26	32.46	34.53	33.06	34.41	28.31	10.4	32.554	1.64625	7.15024e-87	3.26016e-85	-	-	-	-	-	-	-	-	-
LOC105232906	818	718	694	730	673	1398	1843	1165	1417	1652	34.29	35.62	29.08	35.01	33.01	74.33	72.78	69.06	74.34	75.9	33.402	73.282	1.13352	7.74899e-87	3.51862e-85	DHRS4	PREDICTED: dehydrogenase/reductase SDR family member 4 [Bactrocera dorsalis]	Metabolism;Cellular Processes;Metabolism	Global and overview maps;Transport and catabolism;Metabolism of cofactors and vitamins	ko01100//Metabolic pathways;ko04146//Peroxisome;ko00830//Retinol metabolism	K11147;K11147;K11147	-	GO:0003824//catalytic activity	GO:0044710//single-organism metabolic process
LOC105226672	73	68	88	114	69	603	908	618	757	558	3.93	4.33	4.73	7.02	4.34	41.15	46.03	47.02	50.98	32.91	4.87	43.618	3.16293	5.77397e-86	2.61106e-84	-	-	-	-	-	-	-	-	-
LOC105228107	804	567	647	741	622	126	194	128	143	153	28.83	24.06	23.19	30.4	26.1	5.73	6.55	6.49	6.42	6.01	26.516	6.24	-2.08725	2.19984e-85	9.90736e-84	NSA1	PREDICTED: WD repeat-containing protein 74 [Bactrocera dorsalis]	-	-	-	-	-	-	-
LOC105228605	2028	1388	1616	1553	1389	147	352	119	207	257	40.56	32.85	32.31	35.54	32.51	3.73	6.63	3.37	5.18	5.63	34.754	4.908	-2.82397	2.65351e-85	1.1902e-83	Ftsj3	PREDICTED: pre-rRNA processing protein FTSJ3 [Bactrocera dorsalis]	-	-	-	-	GO:0043231//intracellular membrane-bounded organelle;GO:0043232//intracellular non-membrane-bounded organelle	GO:0008173//RNA methyltransferase activity	GO:0000154//rRNA modification
LOC105229651	1837	1541	1404	1436	1212	7130	6391	4886	6968	7518	164.36	163.15	125.55	146.99	126.88	809.02	538.66	618.11	780.23	737.21	145.386	696.646	2.26054	2.79595e-85	1.24901e-83	--	PREDICTED: cuticle collagen 10-like [Bactrocera dorsalis]	-	-	-	-	-	-	-
LOC105230232	4430	4058	5072	3734	4218	1185	1814	1079	1128	1578	68.35	74	78.01	65.39	76.11	21.94	25.7	22.67	21.12	25.54	72.372	23.394	-1.62929	6.7981e-85	3.02461e-83	Sh3d19	PREDICTED: ras guanine nucleotide exchange factor E [Bactrocera dorsalis]	-	-	-	-	-	-	-
LOC105229032	131	157	200	177	224	1350	1565	970	1384	1993	1.27	1.84	1.91	1.99	2.61	17.1	14.56	13.43	17.16	21.79	1.924	16.808	3.12697	1.63932e-84	7.26437e-83	FBLN7	PREDICTED: fibrillin-1 isoform X1 [Bactrocera dorsalis]	-	-	-	-	GO:0031012//extracellular matrix	GO:0046872//metal ion binding	-
LOC105229447	9328	8016	9272	7766	7578	17422	20424	16089	18297	19710	638.53	649.33	634.36	608.18	606.97	1512.43	1317.02	1557.22	1567.48	1478.72	627.474	1486.57	1.24436	2.2499e-84	9.93016e-83	Sod1	superoxide dismutase [Bactrocera dorsalis]	Human Diseases;Cellular Processes;Organismal Systems;Human Diseases;Human Diseases	Neurodegenerative diseases;Transport and catabolism;Aging;Neurodegenerative diseases;Neurodegenerative diseases	ko05016//Huntington disease;ko04146//Peroxisome;ko04213//Longevity regulating pathway - multiple species;ko05014//Amyotrophic lateral sclerosis (ALS);ko05020//Prion diseases	K04565;K04565;K04565;K04565;K04565	GO:0044424//intracellular part	GO:0003824//catalytic activity;GO:0016209//antioxidant activity;GO:0043169//cation binding	GO:0006801//superoxide metabolic process;GO:0044710//single-organism metabolic process
LOC105233961	489	415	515	487	403	862	1273	812	960	1132	11.42	11.52	12.15	13.05	11.01	25.27	27.72	26.57	27.93	28.78	11.83	27.254	1.20402	3.78492e-84	1.66386e-82	Crat	PREDICTED: carnitine O-acetyltransferase isoform X1 [Bactrocera dorsalis]	Cellular Processes	Transport and catabolism	ko04146//Peroxisome	K00624	-	GO:0016740//transferase activity	-
LOC105228101	300	272	286	255	238	830	1035	535	797	860	4.22	4.57	3.86	4.15	3.88	14.28	13.32	10.26	13.8	12.91	4.136	12.914	1.64263	3.94682e-84	1.72814e-82	--	PREDICTED: mucin-5AC isoform X1 [Bactrocera dorsalis]	-	-	-	-	-	-	-
LOC105224360	107	72	95	77	92	334	598	413	403	470	8.19	6.52	7.26	6.74	8.24	32.41	43.1	44.68	38.59	39.41	7.39	39.638	2.42324	9.20037e-84	4.01252e-82	MGST1	PREDICTED: microsomal glutathione S-transferase 1 [Bactrocera dorsalis]	Human Diseases;Human Diseases;Metabolism;Organismal Systems;Human Diseases;Human Diseases;Metabolism;Metabolism;Metabolism;Human Diseases;Human Diseases	Cancers;Cancers;Xenobiotics biodegradation and metabolism;Aging;Cardiovascular diseases;Cancers;Xenobiotics biodegradation and metabolism;Metabolism of other amino acids;Xenobiotics biodegradation and metabolism;Cancers;Drug resistance	ko05200//Pathways in cancer;ko05225//Hepatocellular carcinoma;ko00983//Drug metabolism - other enzymes;ko04212//Longevity regulating pathway - worm;ko05418//Fluid shear stress and atherosclerosis;ko05215//Prostate cancer;ko00980//Metabolism of xenobiotics by cytochrome P450;ko00480//Glutathione metabolism;ko00982//Drug metabolism - cytochrome P450;ko05204//Chemical carcinogenesis;ko01524//Platinu…	K00799;K00799;K00799;K00799;K00799;K00799;K00799;K00799;K00799;K00799;K00799	-	GO:0003824//catalytic activity	-
LOC105225827	2459	2464	2676	2436	2265	4740	6044	3852	4368	5125	48.98	57.95	52.98	55.2	52.74	118.76	112.05	107.46	108.33	110.94	53.57	111.508	1.05765	2.06249e-83	8.95966e-82	ME1	PREDICTED: NADP-dependent malic enzyme isoform X1 [Bactrocera dorsalis]	Metabolism;Metabolism;Metabolism;Organismal Systems	Global and overview maps;Global and overview maps;Carbohydrate metabolism;Endocrine system	ko01100//Metabolic pathways;ko01200//Carbon metabolism;ko00620//Pyruvate metabolism;ko03320//PPAR signaling pathway	K00029;K00029;K00029;K00029	-	-	-
LOC105226984	117	78	96	99	83	385	454	283	381	387	10.19	8.04	8.36	9.87	8.46	42.53	37.25	34.86	41.53	36.95	8.984	38.624	2.10407	2.15217e-83	9.31255e-82	EbpIII	PREDICTED: ejaculatory bulb-specific protein 3 [Bactrocera dorsalis]	-	-	-	-	-	-	-
LOC105225502	2638	2059	2380	2199	2236	665	1164	632	703	778	15.96	14.74	14.4	15.23	15.82	5.1	6.63	5.4	5.32	5.15	15.23	5.52	-1.46418	4.27291e-83	1.84169e-81	Nup153	PREDICTED: nuclear pore complex protein Nup153 isoform X1 [Bactrocera dorsalis]	Genetic Information Processing	Translation	ko03013//RNA transport	K14296	-	-	-
LOC105227929	134	78	104	100	114	423	726	449	418	611	0.66	0.45	0.51	0.56	0.65	2.63	3.35	3.11	2.56	3.28	0.566	2.986	2.39934	5.38856e-83	2.31352e-81	Mpdz	PDZ domain-containing protein 2, partial [Bactrocera dorsalis]	-	-	-	-	-	-	-
LOC105224237	4074	4424	4890	4066	4176	11053	15024	11654	12012	12676	142.08	182.58	170.45	162.23	170.41	488.86	493.59	574.68	524.28	484.52	165.55	513.186	1.63221	1.04287e-82	4.4601e-81	hsd17b12a	PREDICTED: very-long-chain 3-oxoacyl-CoA reductase-B [Bactrocera dorsalis]	Metabolism;Metabolism;Metabolism;Metabolism;Metabolism	Global and overview maps;Global and overview maps;Lipid metabolism;Lipid metabolism;Lipid metabolism	ko01100//Metabolic pathways;ko01212//Fatty acid metabolism;ko00140//Steroid hormone biosynthesis;ko01040//Biosynthesis of unsaturated fatty acids;ko00062//Fatty acid elongation	K10251;K10251;K10251;K10251;K10251	-	-	-
LOC105222695	809	586	564	588	538	78	134	58	88	123	16.66	14.28	11.61	13.86	12.97	2.04	2.6	1.69	2.27	2.78	13.876	2.276	-2.60802	1.31639e-82	5.60813e-81	CG1234	PREDICTED: nucleolar complex protein 3 homolog [Bactrocera dorsalis]	-	-	-	-	-	-	-
LOC105223853	1814	1690	1925	2321	1998	6147	11207	5856	6600	7509	52.06	57.4	55.22	76.21	67.1	223.73	302.99	237.64	237.06	236.2	61.598	247.524	2.00661	1.36722e-82	5.80229e-81	-	-	-	-	-	-	-	-	-
LOC105232824	153	132	134	145	133	617	691	637	584	841	2.58	2.63	2.26	2.8	2.62	13.2	10.98	15.19	12.33	15.54	2.578	13.448	2.38307	1.59329e-82	6.73577e-81	nep-11	PREDICTED: neprilysin-11 [Bactrocera dorsalis]	-	-	-	-	-	GO:0070011//peptidase activity, acting on L-amino acid peptides	GO:0019538//protein metabolic process
LOC105230090	942	719	842	898	812	227	331	173	235	274	18.88	17.05	16.86	20.59	19.04	5.77	6.25	4.9	5.89	6.02	18.484	5.766	-1.68063	2.35983e-82	9.93833e-81	Ddx54	PREDICTED: ATP-dependent RNA helicase DDX54 [Bactrocera dorsalis]	-	-	-	-	GO:0043231//intracellular membrane-bounded organelle	GO:0003676//nucleic acid binding;GO:0017111//nucleoside-triphosphatase activity;GO:0032550//purine ribonucleoside binding	-
LOC105223742	1178	907	1145	1063	1065	151	334	143	151	212	25.85	23.55	25.11	26.69	27.35	4.2	6.9	4.44	4.15	5.1	25.71	4.958	-2.3745	3.11132e-82	1.30533e-80	--	PREDICTED: stAR-related lipid transfer protein 7, mitochondrial [Bactrocera dorsalis]	-	-	-	-	-	-	-
LOC105224475	7768	6592	8190	7021	7223	2484	4056	2212	2454	2790	334.59	336	352.59	345.98	364.04	135.69	164.58	134.72	132.29	131.71	346.64	139.798	-1.31009	4.55669e-82	1.90449e-80	eIF1	PREDICTED: protein translation factor SUI1 homolog [Ceratitis capitata]	Genetic Information Processing	Translation	ko03013//RNA transport	K03113	-	-	GO:0006412//translation
LOC105223125	2902	2542	2848	2551	2711	1098	1572	903	1047	1206	74.87	77.6	73.43	75.29	81.84	35.92	38.2	32.94	33.8	34.1	76.606	34.992	-1.13043	6.71529e-82	2.79609e-80	tatD	PREDICTED: tat-linked quality control protein TatD [Bactrocera oleae]	-	-	-	-	-	GO:0004520//endodeoxyribonuclease activity	-
LOC105233663	349	532	417	351	329	11	11	10	9	12	19.86	35.83	23.72	22.85	21.91	0.79	0.59	0.8	0.64	0.75	24.834	0.714	-5.12025	1.19994e-81	4.97749e-80	--	PREDICTED: cuticle protein 63-like isoform X2 [Bactrocera cucurbitae]	-	-	-	-	-	-	-
LOC105234081	578	487	421	441	392	1241	1633	1114	1368	1399	42.93	42.69	31.26	37.47	34.11	117.06	114.42	117.15	127.21	113.96	37.692	117.96	1.64597	1.48712e-81	6.14566e-80	MGST1	PREDICTED: microsomal glutathione S-transferase 1 isoform X1 [Bactrocera dorsalis]	Human Diseases;Human Diseases;Metabolism;Organismal Systems;Human Diseases;Human Diseases;Metabolism;Metabolism;Metabolism;Human Diseases;Human Diseases	Cancers;Cancers;Xenobiotics biodegradation and metabolism;Aging;Cardiovascular diseases;Cancers;Xenobiotics biodegradation and metabolism;Metabolism of other amino acids;Xenobiotics biodegradation and metabolism;Cancers;Drug resistance	ko05200//Pathways in cancer;ko05225//Hepatocellular carcinoma;ko00983//Drug metabolism - other enzymes;ko04212//Longevity regulating pathway - worm;ko05418//Fluid shear stress and atherosclerosis;ko05215//Prostate cancer;ko00980//Metabolism of xenobiotics by cytochrome P450;ko00480//Glutathione metabolism;ko00982//Drug metabolism - cytochrome P450;ko05204//Chemical carcinogenesis;ko01524//Platinu…	K00799;K00799;K00799;K00799;K00799;K00799;K00799;K00799;K00799;K00799;K00799	-	GO:0003824//catalytic activity	-
LOC105222356	342	327	371	332	277	30	37	17	35	51	6.48	7.34	7.03	7.2	6.14	0.72	0.66	0.46	0.83	1.06	6.838	0.746	-3.19633	1.99636e-81	8.21934e-80	Smox	PREDICTED: spermine oxidase [Bactrocera dorsalis]	-	-	-	-	-	-	GO:0044710//single-organism metabolic process
LOC105230690	33	32	48	30	40	344	631	296	300	325	1.16	1.33	1.69	1.21	1.64	15.33	20.88	14.7	13.19	12.51	1.406	15.322	3.44594	2.54597e-81	1.04432e-79	--	GM21180 [Drosophila sechellia]	-	-	-	-	-	-	-
LOC105231070	714	504	684	582	667	56	108	71	104	112	7.21	6.02	6.9	6.72	7.88	0.72	1.03	1.01	1.31	1.24	6.946	1.062	-2.7094	3.22438e-81	1.3177e-79	Pprc1	Peroxisome proliferator-activated receptor gamma coactivator-related protein 1, partial [Ceratitis capitata]	-	-	-	-	-	GO:0097159//organic cyclic compound binding	-
LOC105222975	813	644	756	733	726	206	277	170	233	258	31.76	29.77	29.52	32.76	33.19	10.21	10.19	9.39	11.39	11.05	31.4	10.446	-1.58781	3.79478e-81	1.54508e-79	Rtc1	PREDICTED: probable RNA 3'-terminal phosphate cyclase-like protein [Bactrocera dorsalis]	Genetic Information Processing	Translation	ko03008//Ribosome biogenesis in eukaryotes	K11108	GO:0043232//intracellular non-membrane-bounded organelle	-	GO:0010467//gene expression;GO:0022613//ribonucleoprotein complex biogenesis
LOC105226287	103	77	82	85	78	290	417	300	353	408	2.39	2.12	1.9	2.26	2.12	8.54	9.12	9.85	10.26	10.39	2.158	9.632	2.15814	6.05878e-81	2.45782e-79	Orct	PREDICTED: organic cation transporter protein [Bactrocera dorsalis]	Human Diseases	Cancers	ko05231//Choline metabolism in cancer	K08202	GO:0031224//intrinsic component of membrane	GO:0005215//transporter activity	GO:0044763//single-organism cellular process
LOC105230230	1574	1107	1373	1481	1310	351	560	283	366	429	27.18	22.62	23.7	29.26	26.47	7.69	9.11	6.91	7.91	8.12	25.846	7.948	-1.70128	9.36763e-81	3.78617e-79	Wdr3	PREDICTED: WD repeat-containing protein 3 [Bactrocera dorsalis]	Genetic Information Processing	Translation	ko03008//Ribosome biogenesis in eukaryotes	K14556	-	-	GO:0033554//cellular response to stress
LOC105224755	534	437	560	519	428	1015	1340	837	931	1211	27.75	26.88	29.09	30.86	26.03	66.9	65.61	61.51	60.56	68.98	28.122	64.712	1.20233	1.27222e-80	5.12325e-79	Stat92E	Signal transducer and transcription activator [Bactrocera dorsalis]	Human Diseases;Human Diseases;Human Diseases;Human Diseases;Organismal Systems;Cellular Processes;Environmental Information Processing;Human Diseases;Human Diseases;Organismal Systems;Human Diseases;Human Diseases;Organismal Systems;Organismal Systems;Environmental Information Processing;Human Diseases	Cancers;Infectious diseases;Cancers;Infectious diseases;Immune system;Cell growth and death;Signal transduction;Endocrine and metabolic diseases;Infectious diseases;Endocrine system;Cancers;Cancers;Immune system;Immune system;Signal transduction;Cancers	ko05200//Pathways in cancer;ko05166//HTLV-I infection;ko05203//Viral carcinogenesis;ko05161//Hepatitis B;ko04062//Chemokine signaling pathway;ko04217//Necroptosis;ko04012//ErbB signaling pathway;ko04933//AGE-RAGE signaling pathway in diabetic complications;ko05162//Measles;ko04917//Prolactin signaling pathway;ko05223//Non-small cell lung cancer;ko05220//Chronic myeloid leukemia;ko04659//Th17 cell…	K11224;K11224;K11224;K11224;K11224;K11224;K11224;K11224;K11224;K11224;K11224;K11224;K11224;K11224;K11224;K11224	-	-	-
LOC105228014	2319	1911	2051	1927	1908	481	917	474	636	678	47.49	46.31	41.98	45.15	45.72	12.49	17.69	13.72	16.3	15.22	45.33	15.084	-1.58745	3.14756e-80	1.25834e-78	CG7338	PREDICTED: LOW QUALITY PROTEIN: pre-rRNA-processing protein TSR1 homolog [Bactrocera dorsalis]	-	-	-	-	GO:0043232//intracellular non-membrane-bounded organelle	-	GO:0022613//ribonucleoprotein complex biogenesis;GO:0030154//cell differentiation
LOC105231741	321	320	314	349	299	1318	1734	1261	964	1393	4.96	5.85	4.89	6.17	5.4	25.87	25.24	27.55	18.66	23.61	5.454	24.186	2.14879	5.62936e-80	2.2424e-78	Orct2	PREDICTED: organic cation transporter-like protein isoform X1 [Bactrocera dorsalis]	Human Diseases	Cancers	ko05231//Choline metabolism in cancer	K08202	-	GO:0005215//transporter activity	GO:0044763//single-organism cellular process
LOC109579802	269	242	346	328	253	1064	1230	874	872	1091	7.11	7.57	9.14	9.92	7.83	35.67	30.63	32.67	28.85	31.61	8.314	31.886	1.93931	8.03532e-80	3.18927e-78	ea	PREDICTED: serine protease easter-like [Bactrocera dorsalis]	-	-	-	-	-	GO:0004175//endopeptidase activity	GO:0019538//protein metabolic process
LOC105224905	2193	1865	2021	1961	2025	665	904	503	657	621	19.94	20.07	18.37	20.4	21.55	7.67	7.74	6.47	7.48	6.19	20.066	7.11	-1.49683	1.042e-79	4.12094e-78	sws	PREDICTED: neuropathy target esterase sws isoform X1 [Bactrocera dorsalis]	Metabolism	Lipid metabolism	ko00564//Glycerophospholipid metabolism	K14676	-	-	-
LOC105232174	842	646	754	679	661	236	282	183	213	267	16.5	14.98	14.76	15.22	15.15	5.86	5.2	5.07	5.22	5.73	15.322	5.416	-1.5003	4.65373e-79	1.8339e-77	GK15670	PREDICTED: LOW QUALITY PROTEIN: bifunctional lysine-specific demethylase and histidyl-hydroxylase NO66 [Bactrocera dorsalis]	-	-	-	-	GO:0043231//intracellular membrane-bounded organelle	GO:0016706//oxidoreductase activity, acting on paired donors, with incorporation or reduction of molecular oxygen, 2-oxoglutarate as one donor, and incorporation of one atom each of oxygen into both donors;GO:0032452//histone demethylase activity;GO:0046914//transition metal ion binding	GO:0006355//regulation of transcription, DNA-templated;GO:0070076//histone lysine demethylation
LOC105222451	599	493	603	456	448	116	167	100	104	145	20.06	19.43	20.05	17.31	17.39	4.91	5.34	4.78	4.46	5.36	18.848	4.97	-1.92309	5.47074e-79	2.14819e-77	--	PREDICTED: adult enhancer factor 1 [Bactrocera dorsalis]	-	-	-	-	-	-	-
LOC105223244	1129	962	1112	963	989	2114	3267	1803	2288	2137	23.39	23.58	23.02	22.82	23.97	55.54	63.76	52.81	59.32	48.52	23.356	55.99	1.26138	8.16025e-79	3.19292e-77	Aspg	PREDICTED: L-asparaginase [Bactrocera dorsalis]	-	-	-	-	-	-	GO:0019752//carboxylic acid metabolic process
LOC105227008	87	175	155	107	125	944	1559	878	1432	1386	1.93	4.58	3.43	2.71	3.24	26.49	32.5	27.47	39.65	33.61	3.178	31.944	3.32935	1.40674e-78	5.48478e-77	Alp4	PREDICTED: alkaline phosphatase 4 [Bactrocera dorsalis]	Metabolism;Metabolism;Metabolism	Global and overview maps;Metabolism of cofactors and vitamins;Metabolism of cofactors and vitamins	ko01100//Metabolic pathways;ko00790//Folate biosynthesis;ko00730//Thiamine metabolism	K01077;K01077;K01077	-	GO:0016791//phosphatase activity	GO:0006796//phosphate-containing compound metabolic process
LOC105227552	1000	975	1154	971	1006	2206	2879	1891	2010	2282	27.43	32.01	32.09	30.89	32.71	78.26	76.15	74.59	70.01	69.79	31.026	73.76	1.24936	1.70169e-78	6.58822e-77	FBXL7	PREDICTED: F-box/LRR-repeat protein 7 isoform X1 [Bactrocera dorsalis]	-	-	-	-	-	GO:0019787//ubiquitin-like protein transferase activity	GO:0043161//proteasome-mediated ubiquitin-dependent protein catabolic process
LOC105230918	934	710	828	726	779	135	248	93	169	151	35.05	31.53	31.06	31.17	34.21	6.42	8.77	4.93	7.94	6.21	32.604	6.854	-2.25003	4.27144e-78	1.64794e-76	ppan	PREDICTED: protein Peter pan [Bactrocera dorsalis]	-	-	-	-	-	-	-
LOC105232757	284	252	293	237	255	728	871	555	791	917	11.53	12.1	11.88	11	12.11	37.47	33.3	31.85	40.17	40.79	11.724	36.716	1.64694	4.84835e-78	1.864e-76	TMED6	PREDICTED: transmembrane emp24 domain-containing protein B [Bactrocera dorsalis]	-	-	-	-	GO:0031224//intrinsic component of membrane	-	-
LOC105228793	1390	1201	1508	1325	1306	2911	3820	2490	3645	3734	25.22	25.79	27.35	27.5	27.73	66.98	65.29	63.88	82.77	74.25	26.718	70.634	1.40255	4.96974e-78	1.90403e-76	Ganab	PREDICTED: neutral alpha-glucosidase AB [Bactrocera dorsalis]	Metabolism;Genetic Information Processing;Metabolism	Global and overview maps;Folding, sorting and degradation;Glycan biosynthesis and metabolism	ko01100//Metabolic pathways;ko04141//Protein processing in endoplasmic reticulum;ko00510//N-Glycan biosynthesis	K05546;K05546;K05546	-	GO:0005488//binding;GO:0016798//hydrolase activity, acting on glycosyl bonds	GO:0044238//primary metabolic process
LOC105232960	1903	1411	1616	1301	1104	248	261	245	256	292	34.36	30.15	29.17	26.88	23.33	5.68	4.44	6.26	5.79	5.78	28.778	5.59	-2.36405	5.91996e-78	2.26024e-76	--	PREDICTED: mucin-5AC-like [Bactrocera latifrons]	-	-	-	-	-	-	-
LOC105233900	2712	2688	3326	2428	2436	851	1131	733	827	951	40.74	47.7	50.98	41.82	42.9	12.54	11.99	12.76	12.14	12.71	44.828	12.428	-1.85081	1.11958e-77	4.2598e-76	SH3KBP1	SH3 domain-containing kinase-binding protein 1 [Bactrocera dorsalis]	-	-	-	-	-	-	-
LOC105232060	770	636	718	732	701	1650	2185	1462	1491	1614	23.11	22.58	21.53	25.13	24.61	62.79	61.77	62.03	55.99	53.08	23.392	59.132	1.33792	2.71394e-77	1.02906e-75	--	GL14211 [Drosophila persimilis]	-	-	-	-	-	-	-
LOC105228926	461	335	381	331	338	52	96	46	68	72	6.64	5.71	5.48	5.45	5.7	0.95	1.31	0.94	1.23	1.14	5.796	1.114	-2.37931	3.68176e-77	1.39125e-75	CG8414	PREDICTED: polynucleotide 5'-hydroxyl-kinase NOL9 [Bactrocera dorsalis]	-	-	-	-	GO:0043231//intracellular membrane-bounded organelle	GO:0016772//transferase activity, transferring phosphorus-containing groups;GO:0032550//purine ribonucleoside binding	GO:0006796//phosphate-containing compound metabolic process
LOC105232402	234	211	225	236	190	737	847	586	581	701	4.9	5.23	4.71	5.65	4.65	19.57	16.7	17.35	15.22	16.09	5.028	16.986	1.75629	5.00566e-77	1.88507e-75	grk	PREDICTED: protein gurken [Bactrocera dorsalis]	Environmental Information Processing;Organismal Systems	Signal transduction;Development	ko04013//MAPK signaling pathway - fly;ko04320//Dorso-ventral axis formation	K02447;K02447	-	-	-
MSTRG.3061	3	1	2	2	2	1218	1315	819	3072	2256	0.29	0.12	0.19	0.22	0.23	150.58	120.76	112.89	374.79	241.04	0.21	200.012	9.89548	1.66452e-76	6.22585e-75	--	-	-	-	-	-	-	-	-
LOC105230607	16019	12555	17318	12313	14915	3690	5842	2823	3107	3876	162.49	151.06	175.58	143.31	177.06	47.66	54.94	40.65	39.36	42.94	161.9	45.11	-1.84358	2.69406e-76	1.00427e-74	--	Protein disulfide-isomerase A4 [Bactrocera dorsalis]	-	-	-	-	-	GO:0003824//catalytic activity	-
LOC105233784	1555	1389	1585	1394	1403	564	794	463	510	686	23.48	24.82	23.92	24.08	24.79	10.8	11.29	9.88	9.64	11.35	24.218	10.592	-1.1931	6.8641e-76	2.55012e-74	Ipo9	PREDICTED: importin-9 [Bactrocera dorsalis]	-	-	-	-	-	GO:0017016//Ras GTPase binding	-
LOC105222115	759	646	690	617	668	198	260	156	216	215	23.49	23.66	21.34	21.85	24.19	7.77	7.58	6.83	8.37	7.29	22.906	7.568	-1.59774	7.2081e-76	2.66893e-74	wcd	PREDICTED: U3 small nucleolar RNA-associated protein 18 homolog [Bactrocera dorsalis]	Genetic Information Processing	Translation	ko03008//Ribosome biogenesis in eukaryotes	K14553	-	-	-
LOC105223188	991	702	730	712	646	78	179	65	72	112	21.95	18.4	16.16	18.05	16.75	2.19	3.74	2.04	2	2.72	18.262	2.538	-2.84708	8.04081e-76	2.9673e-74	Nnp-1	PREDICTED: ribosomal RNA processing protein 1 homolog [Bactrocera dorsalis]	-	-	-	-	-	-	-
LOC105224370	3913	2937	3492	3091	2934	595	1307	569	716	861	99.93	88.76	89.13	90.31	87.68	19.27	31.44	20.55	22.88	24.1	91.162	23.648	-1.94671	1.63928e-75	6.00925e-74	GM12330	Pescadillo-like protein, partial [Bactrocera dorsalis]	-	-	-	-	-	-	-
LOC105230446	1032	866	995	1003	813	2225	2605	1662	2013	2091	36.57	36.31	35.24	40.66	33.71	99.98	86.95	83.26	89.26	81.2	36.498	88.13	1.27182	1.77792e-75	6.49587e-74	Acads	PREDICTED: short-chain specific acyl-CoA dehydrogenase, mitochondrial [Bactrocera dorsalis]	Metabolism;Metabolism;Metabolism;Metabolism;Metabolism;Metabolism	Global and overview maps;Global and overview maps;Global and overview maps;Lipid metabolism;Amino acid metabolism;Carbohydrate metabolism	ko01100//Metabolic pathways;ko01200//Carbon metabolism;ko01212//Fatty acid metabolism;ko00071//Fatty acid degradation;ko00280//Valine, leucine and isoleucine degradation;ko00650//Butanoate metabolism	K00248;K00248;K00248;K00248;K00248;K00248	-	GO:0000166//nucleotide binding;GO:0016491//oxidoreductase activity	GO:0044710//single-organism metabolic process
LOC105221856	954	694	828	755	776	137	290	129	148	195	21.8	18.76	18.91	19.73	20.74	3.97	6.24	4.17	4.23	4.88	19.988	4.698	-2.08902	2.62096e-75	9.54444e-74	REXO5	PREDICTED: small RNA degrading nuclease 5 [Bactrocera dorsalis]	Genetic Information Processing	Translation	ko03008//Ribosome biogenesis in eukaryotes	K14570	-	-	-
LOC105226342	1003	869	1024	979	856	268	379	282	314	337	50.89	52.17	51.93	56.83	50.82	17.24	18.11	20.23	19.94	18.74	52.528	18.852	-1.47837	3.50107e-75	1.27075e-73	CG9286	PREDICTED: protein BCCIP homolog [Bactrocera dorsalis]	-	-	-	-	-	-	-
LOC105233929	910	1030	948	1184	1093	3443	4935	3715	3594	4580	28.25	37.83	29.42	42.04	39.7	135.54	144.29	163.04	139.6	155.82	35.448	147.658	2.05848	5.56187e-75	2.01212e-73	faah2b	PREDICTED: fatty-acid amide hydrolase 2-A-like [Bactrocera dorsalis]	-	-	-	-	-	GO:0016810//hydrolase activity, acting on carbon-nitrogen (but not peptide) bonds;GO:0016879//ligase activity, forming carbon-nitrogen bonds	-
LOC105221954	784	498	825	619	733	109	153	103	92	104	8.07	6.07	8.49	7.29	8.83	1.42	1.48	1.5	1.19	1.17	7.75	1.352	-2.5191	7.17338e-75	2.58663e-73	-	-	-	-	-	-	-	-	-
LOC105232000	1296	1066	1172	1142	1045	2420	2864	1931	2255	2293	40.17	39.11	36.34	40.54	37.92	95.3	83.74	84.78	87.66	78.1	38.816	85.916	1.14628	7.24061e-74	2.60237e-72	Acp7	PREDICTED: acid phosphatase type 7 isoform X1 [Bactrocera dorsalis]	-	-	-	-	-	GO:0043169//cation binding	-
LOC105222801	542	395	417	488	420	92	105	64	87	99	28.39	24.48	21.83	29.24	25.74	6.11	5.18	4.74	5.7	5.68	25.936	5.482	-2.24218	1.04566e-73	3.74603e-72	Rrp7a	PREDICTED: ribosomal RNA-processing protein 7 homolog A [Bactrocera dorsalis]	Genetic Information Processing	Translation	ko03008//Ribosome biogenesis in eukaryotes	K14545	-	GO:0097159//organic cyclic compound binding	GO:0033554//cellular response to stress
LOC105226982	4817	3644	3433	4217	3002	11437	13662	10293	12287	15133	119.25	106.75	84.94	119.44	86.96	359.07	318.61	360.29	380.68	410.6	103.468	365.85	1.82207	1.49568e-73	5.34088e-72	tf	PREDICTED: transferrin [Bactrocera dorsalis]	-	-	-	-	-	GO:0005506//iron ion binding	GO:0000041//transition metal ion transport;GO:0046916//cellular transition metal ion homeostasis
LOC105225949	319	238	292	296	250	936	1373	675	712	948	6.54	5.78	5.99	6.95	6	24.35	26.53	19.57	18.28	21.31	6.252	22.008	1.81564	1.75935e-73	6.26216e-72	MCOLN3	PREDICTED: mucolipin-3-like [Bactrocera dorsalis]	-	-	-	-	GO:0005765//lysosomal membrane;GO:0010008//endosome membrane;GO:0034702//ion channel complex	GO:0015276//ligand-gated ion channel activity;GO:1902936//phosphatidylinositol bisphosphate binding	GO:0006875//cellular metal ion homeostasis;GO:0032006//regulation of TOR signaling;GO:0044126//regulation of growth of symbiont in host;GO:0044248//cellular catabolic process;GO:0045168//cell-cell signaling involved in cell fate commitment;GO:0048284//organelle fusion;GO:0070838//divalent metal ion transport
LOC105227766	886	823	860	916	809	1711	2361	1594	1994	2389	55.52	61.03	53.86	65.67	59.32	135.97	139.37	141.23	156.37	164.07	59.08	147.402	1.31901	2.36202e-73	8.38025e-72	Cd53	PREDICTED: 23 kDa integral membrane protein [Bactrocera dorsalis]	Cellular Processes;Human Diseases	Transport and catabolism;Cancers	ko04142//Lysosome;ko05205//Proteoglycans in cancer	K06497;K06497	GO:0031224//intrinsic component of membrane	-	-
LOC105233930	261	269	262	282	195	700	1041	581	669	893	8.09	9.87	8.12	10	7.07	27.52	30.4	25.47	25.96	30.34	8.63	27.938	1.6948	8.86629e-73	3.1356e-71	faah2b	PREDICTED: fatty-acid amide hydrolase 2-B [Bactrocera dorsalis]	-	-	-	-	-	GO:0016810//hydrolase activity, acting on carbon-nitrogen (but not peptide) bonds;GO:0016879//ligase activity, forming carbon-nitrogen bonds	-
LOC105231112	202	149	228	212	171	589	764	522	521	605	5.52	4.79	6.2	6.6	5.44	20.35	19.57	20.11	17.73	18.08	5.71	19.168	1.74714	1.01983e-72	3.59513e-71	Cyp12e1	PREDICTED: probable cytochrome P450 12e1, mitochondrial isoform X1 [Bactrocera dorsalis]	-	-	-	-	-	GO:0016491//oxidoreductase activity;GO:0046906//tetrapyrrole binding	GO:0044710//single-organism metabolic process
LOC105226645	1735	1638	1838	1567	1689	556	887	519	588	710	46.07	51.49	48.78	47.61	52.49	18.73	22.18	19.49	19.54	20.66	49.288	20.12	-1.29261	1.02445e-72	3.59994e-71	CG14683	PREDICTED: probable methyltransferase-like protein 15 homolog [Bactrocera dorsalis]	-	-	-	-	-	-	GO:0008152//metabolic process
LOC105233809	3	0	1	2	2	946	1234	777	723	999	0.23	0	0.08	0.17	0.18	91.39	88.55	83.69	68.93	83.41	0.132	83.194	9.2998	1.37336e-72	4.79547e-71	--	PREDICTED: glycine-rich RNA-binding protein 2-like [Bactrocera dorsalis]	-	-	-	-	-	-	-
LOC105224893	871	712	787	767	697	1242	1867	1217	1434	1746	15.06	14.57	13.6	15.17	14.1	27.23	30.41	29.75	31.03	33.09	14.5	30.302	1.06336	2.81306e-72	9.79157e-71	-	-	-	-	-	-	-	-	-
LOC105228814	229	209	285	254	209	620	778	499	590	658	7.03	7.59	8.74	8.92	7.51	24.14	22.5	21.66	22.67	22.14	7.958	22.622	1.50725	3.06826e-72	1.06463e-70	HGSNAT	PREDICTED: heparan-alpha-glucosaminide N-acetyltransferase [Bactrocera dorsalis]	Metabolism;Cellular Processes;Metabolism	Global and overview maps;Transport and catabolism;Glycan biosynthesis and metabolism	ko01100//Metabolic pathways;ko04142//Lysosome;ko00531//Glycosaminoglycan degradation	K10532;K10532;K10532	-	-	-
LOC105228166	1618	1165	1369	1239	1208	201	435	239	237	232	42.65	36.34	36.07	37.36	37.26	6.72	10.8	8.91	7.82	6.7	37.936	8.19	-2.21163	5.88215e-72	2.0346e-70	mbm	PREDICTED: protein mushroom body miniature [Bactrocera dorsalis]	-	-	-	-	-	-	-
LOC105233575	1182	858	1114	944	939	308	468	225	269	356	12.85	11.12	12.21	11.88	12.08	4.06	4.86	3.38	3.7	4.04	12.028	4.008	-1.58544	9.81316e-72	3.3837e-70	Kdm6a	PREDICTED: lysine-specific demethylase 6A isoform X1 [Bactrocera dorsalis]	Human Diseases	Cancers	ko05202//Transcriptional misregulation in cancers	K11447	-	-	GO:0008152//metabolic process
LOC105227921	490	351	346	538	300	1922	2588	1989	1828	2001	15.07	12.77	10.63	18.93	10.8	74.96	74.97	86.49	70.35	67.44	13.64	74.842	2.456	1.06069e-71	3.64601e-70	-	-	-	-	-	-	-	-	-
LOC105227657	84	47	44	51	39	332	403	242	370	415	1.98	1.24	0.98	1.43	1.02	9.6	8.72	8.09	10.33	10.67	1.33	9.482	2.83377	1.42039e-71	4.86725e-70	Tret1-2	PREDICTED: facilitated trehalose transporter Tret1-2 homolog [Bactrocera dorsalis]	-	-	-	-	-	-	-
LOC105222072	8	4	4	7	5	1299	2613	1323	4183	5579	0.49	0.29	0.24	0.49	0.36	100.4	150.01	114	319.04	372.64	0.374	211.218	9.14148	2.03405e-71	6.94853e-70	Semp1	PREDICTED: seminal metalloprotease 1-like [Bactrocera dorsalis]	-	-	-	-	-	-	-
LOC105230188	1705	1528	1883	1377	1421	378	661	359	344	448	16.36	17.38	17.99	15.01	15.76	4.63	5.94	4.82	4.13	4.62	16.5	4.828	-1.77297	3.51771e-71	1.19798e-69	Ppp1r14b	PREDICTED: protein phosphatase 1 regulatory subunit 14B [Bactrocera dorsalis]	-	-	-	-	GO:0044424//intracellular part	-	GO:0016310//phosphorylation
LOC105224676	1160	962	971	933	1038	3047	3369	2634	2401	3024	25.49	25.01	21.32	23.45	26.69	84.9	69.73	81.83	66.02	72.82	24.392	75.06	1.62164	3.94609e-71	1.33973e-69	Hacl1	PREDICTED: 2-hydroxyacyl-CoA lyase 1 [Bactrocera dorsalis]	Cellular Processes	Transport and catabolism	ko04146//Peroxisome	K12261	-	GO:0003824//catalytic activity;GO:0019842//vitamin binding	-
LOC105233812	1151	1085	1236	981	1050	2289	2707	1836	2216	2348	10.42	11.62	11.18	10.16	11.12	26.28	23.08	23.5	25.1	23.29	10.9	24.25	1.15366	4.26344e-71	1.44303e-69	-	-	-	-	-	-	-	-	-
LOC105226778	2	3	2	4	4	312	409	255	357	303	0.04	0.07	0.04	0.09	0.1	8.14	7.92	7.41	9.19	6.83	0.068	7.898	6.85981	1.29766e-70	4.35209e-69	P4HA2	PREDICTED: prolyl 4-hydroxylase subunit alpha-2 [Bactrocera dorsalis]	Metabolism;Metabolism	Global and overview maps;Amino acid metabolism	ko01100//Metabolic pathways;ko00330//Arginine and proline metabolism	K00472;K00472	GO:0044432//endoplasmic reticulum part	GO:0016706//oxidoreductase activity, acting on paired donors, with incorporation or reduction of molecular oxygen, 2-oxoglutarate as one donor, and incorporation of one atom each of oxygen into both donors	-
LOC105224511	802	696	870	790	708	1633	2061	1608	1649	1795	21.76	21.97	23.58	24.79	22.47	55.74	52.94	61.67	56.25	53.55	22.914	56.03	1.28997	2.31424e-70	7.73799e-69	--	PREDICTED: uncharacterized protein LOC105224511 isoform X1 [Bactrocera dorsalis]	-	-	-	-	-	-	-
LOC105223071	552	481	505	461	423	2146	2196	1147	1578	1756	21.42	22.08	19.58	20.47	19.21	105.62	80.28	62.94	76.64	74.68	20.552	80.032	1.9613	2.91289e-70	9.71023e-69	--	GL15967 [Drosophila persimilis]	-	-	-	-	-	-	-
LOC105227094	1933	1457	1552	1425	1401	153	422	149	181	227	22.91	20.43	18.38	19.32	19.43	2.3	4.71	2.5	2.68	2.95	20.094	3.028	-2.73033	4.03234e-70	1.33612e-68	PDCD11	PREDICTED: protein RRP5 homolog [Bactrocera dorsalis]	-	-	-	-	GO:0043231//intracellular membrane-bounded organelle	-	GO:0048024//regulation of mRNA splicing, via spliceosome
LOC105223979	2483	2000	2413	2360	2193	813	1047	678	862	1077	35.16	33.51	34.15	38.23	36.33	14.6	13.97	13.57	15.28	16.71	35.476	14.826	-1.25871	7.39953e-70	2.4445e-68	CTPsyn	PREDICTED: LOW QUALITY PROTEIN: CTP synthase [Bactrocera dorsalis]	Metabolism;Metabolism	Global and overview maps;Nucleotide metabolism	ko01100//Metabolic pathways;ko00240//Pyrimidine metabolism	K01937;K01937	-	GO:0016879//ligase activity, forming carbon-nitrogen bonds;GO:0032550//purine ribonucleoside binding	GO:0006241//CTP biosynthetic process;GO:0009064//glutamine family amino acid metabolic process
LOC105232186	13806	10464	13726	9430	10674	1950	4222	1949	2036	2540	265.49	238.12	263.81	207.46	240.18	47.56	76.48	52.99	49	53.53	243.012	55.912	-2.1198	7.70546e-70	2.53797e-68	ctp	cut up, isoform A [Drosophila melanogaster]	Organismal Systems	Excretory system	ko04962//Vasopressin-regulated water reabsorption	K10418	GO:0030286//dynein complex	GO:0003774//motor activity;GO:0016887//ATPase activity;GO:0045502//dynein binding;GO:0046983//protein dimerization activity	GO:0006997//nucleus organization;GO:0007281//germ cell development;GO:0007423//sensory organ development;GO:0007444//imaginal disc development;GO:0009887//organ morphogenesis;GO:0022607//cellular component assembly;GO:0035114//imaginal disc-derived appendage morphogenesis;GO:0040001//establishment of mitotic spindle localization;GO:0044248//cellular catabolic process;GO:0048102//autophagic cell d…
LOC105227124	1092	989	1207	965	962	2355	2987	2396	2352	2522	34.17	36.42	38.56	35.94	35.8	92.35	90.41	107.37	92.32	87.89	36.178	94.068	1.37859	1.23714e-69	4.06267e-68	CG10671	PREDICTED: FIT family protein CG10671 [Bactrocera dorsalis]	-	-	-	-	-	-	-
LOC105223775	2681	2459	2958	2629	2338	4773	6070	4614	4824	5702	81.34	87.68	88.52	89.22	81.62	184.67	169.45	197.44	183.04	188.06	85.676	184.532	1.10691	1.8984e-69	6.21571e-68	WBP2NL	PREDICTED: WW domain-binding protein 2 [Bactrocera dorsalis]	-	-	-	-	-	-	-
LOC105224776	455	347	383	355	293	1352	1461	1048	1345	1110	59.18	53.41	49.79	52.82	44.59	223	179	192.72	218.93	158.23	51.958	194.376	1.90343	2.26159e-69	7.38295e-68	Dbi	PREDICTED: acyl-CoA-binding protein homolog [Bactrocera dorsalis]	-	-	-	-	-	-	-
LOC105223310	2322	1860	2179	1842	2087	458	905	505	581	698	42.69	40.62	40.42	39.05	45.36	11.05	15.84	13.2	13.68	14.31	41.628	13.616	-1.61225	2.47763e-69	8.06435e-68	CG6966	PREDICTED: protein fem-1 homolog CG6966 [Bactrocera dorsalis]	-	-	-	-	-	-	-
LOC105231497	18601	15924	16399	16927	14679	31086	37050	24034	30274	37471	569.4	576.83	501.73	592.8	525.78	1206.79	1068.39	1040.24	1159.79	1257.14	553.308	1146.47	1.05104	2.63927e-69	8.56519e-68	alphaTub84B	GL12416 [Drosophila persimilis]	Cellular Processes;Cellular Processes;Cellular Processes;Cellular Processes;Human Diseases	Transport and catabolism;Cellular community - eukaryotes;Cell growth and death;Cellular community - eukaryotes;Infectious diseases	ko04145//Phagosome;ko04530//Tight junction;ko04210//Apoptosis;ko04540//Gap junction;ko05130//Pathogenic Escherichia coli infection	K07374;K07374;K07374;K07374;K07374	GO:0005815//microtubule organizing center;GO:0005876//spindle microtubule;GO:0031224//intrinsic component of membrane;GO:0043231//intracellular membrane-bounded organelle;GO:0044444//cytoplasmic part	GO:0005198//structural molecule activity;GO:0008092//cytoskeletal protein binding;GO:0015405//P-P-bond-hydrolysis-driven transmembrane transporter activity;GO:0017111//nucleoside-triphosphatase activity;GO:0032550//purine ribonucleoside binding	GO:0006959//humoral immune response;GO:0007051//spindle organization;GO:0043623//cellular protein complex assembly;GO:0051234//establishment of localization;GO:0061640//cytoskeleton-dependent cytokinesis;GO:0071173//spindle assembly checkpoint
LOC105225180	1201	975	1127	910	981	1938	2655	1550	1875	2570	63.7	61.2	59.75	55.22	60.89	130.24	132.56	116.19	124.44	149.3	60.152	130.546	1.11787	2.95188e-69	9.55164e-68	pho2	PREDICTED: 4-nitrophenylphosphatase-like isoform X1 [Bactrocera dorsalis]	Metabolism	Metabolism of terpenoids and polyketides	ko00981//Insect hormone biosynthesis	K21013	-	-	-
LOC105233248	2913	2601	3107	2539	2549	621	1205	593	851	949	63.09	66.66	67.26	62.91	64.6	17.06	24.59	18.16	23.07	22.53	64.904	21.082	-1.6223	3.54398e-69	1.14007e-67	TIMM44	PREDICTED: mitochondrial import inner membrane translocase subunit TIM44 [Bactrocera dorsalis]	-	-	-	-	GO:0019866//organelle inner membrane	GO:0008320//protein transmembrane transporter activity	GO:0015031//protein transport
LOC105227904	2442	1934	2180	1949	1863	4219	7315	3780	4038	4685	56.35	52.64	50.28	52.03	50.56	128.04	164.98	128.17	121.01	123	52.372	133.04	1.34499	4.24048e-69	1.36016e-67	PANK1	PREDICTED: pantothenate kinase 3 isoform X1 [Bactrocera dorsalis]	Metabolism;Metabolism	Global and overview maps;Metabolism of cofactors and vitamins	ko01100//Metabolic pathways;ko00770//Pantothenate and CoA biosynthesis	K09680;K09680	-	GO:0016772//transferase activity, transferring phosphorus-containing groups;GO:0032550//purine ribonucleoside binding	GO:0006796//phosphate-containing compound metabolic process;GO:0009108//coenzyme biosynthetic process
LOC105232189	471	433	401	578	434	2843	2381	1947	2137	2328	9.54	10.38	8.12	13.4	10.29	73.05	45.44	55.77	54.18	51.69	10.346	56.026	2.43702	6.00995e-69	1.92214e-67	--	Protein spinster-1 [Ceratitis capitata]	-	-	-	-	GO:0031224//intrinsic component of membrane	-	GO:0044763//single-organism cellular process
LOC105233829	109	91	83	123	93	458	537	310	482	552	2.46	2.43	1.87	3.17	2.45	13.1	11.41	9.89	13.61	13.65	2.476	12.332	2.31632	6.47721e-69	2.06559e-67	Spn27A	PREDICTED: serine protease inhibitor 27A-like [Bactrocera dorsalis]	-	-	-	-	-	-	-
LOC105224390	1285	1076	1203	1046	1058	397	495	373	419	483	69.28	68.65	64.83	64.52	66.75	27.15	25.14	28.44	28.27	28.54	66.806	27.508	-1.28013	1.06078e-68	3.3731e-67	rlp7	PREDICTED: 60S ribosomal protein L7 [Bactrocera dorsalis]	Genetic Information Processing	Translation	ko03010//Ribosome	K02937	GO:0032991//macromolecular complex	-	GO:0022613//ribonucleoprotein complex biogenesis
LOC105225025	1353	1379	1506	1260	1330	412	549	402	403	489	49.86	60.14	55.47	53.12	57.35	19.26	19.06	20.95	18.59	19.75	55.188	19.522	-1.49925	1.07666e-68	3.41374e-67	--	GH14961 [Drosophila grimshawi]	-	-	-	-	-	-	-
LOC105224472	1062	931	1008	788	904	1912	2548	1698	1781	1997	23.06	23.92	21.87	19.57	22.97	52.65	52.11	52.13	48.39	47.52	22.278	50.56	1.18238	1.26648e-68	4.00411e-67	CG1311	PREDICTED: CTL-like protein 1 [Bactrocera dorsalis]	Human Diseases	Cancers	ko05231//Choline metabolism in cancer	K06515	GO:0031224//intrinsic component of membrane	-	-
LOC105223013	203	139	143	200	151	830	898	655	1086	1119	3.38	2.73	2.37	3.81	2.97	17.53	14.1	15.41	22.57	20.39	3.052	18	2.56017	1.59344e-68	5.02344e-67	yin	PREDICTED: peptide transporter family 1 isoform X1 [Bactrocera dorsalis]	Organismal Systems	Digestive system	ko04974//Protein digestion and absorption	K14206	-	-	-
LOC105229128	413	391	417	443	327	1026	1422	1169	1142	1293	20.09	22.51	20.28	24.66	18.62	63.31	65.17	80.42	69.54	68.95	21.232	69.478	1.71032	4.21212e-68	1.31662e-66	hsdl2	PREDICTED: hydroxysteroid dehydrogenase-like protein 2 [Bactrocera dorsalis]	-	-	-	-	-	GO:0003824//catalytic activity	GO:0044710//single-organism metabolic process
LOC105226131	1210	1131	1227	1121	983	2715	3380	2677	2643	2694	31.54	34.88	31.96	33.43	29.98	89.74	82.99	98.65	86.21	76.95	32.358	86.908	1.42537	6.78025e-68	2.11337e-66	PEX5	PREDICTED: peroxisomal targeting signal 1 receptor [Bactrocera dorsalis]	Cellular Processes	Transport and catabolism	ko04146//Peroxisome	K13342	-	-	-
LOC105226149	1255	1117	1309	1022	1107	2655	3593	2685	3268	2828	25.44	26.79	26.52	23.7	26.25	68.24	68.6	76.95	82.89	62.82	25.74	71.9	1.48198	1.48393e-67	4.61229e-66	ALPL	PREDICTED: alkaline phosphatase [Bactrocera dorsalis]	Metabolism;Metabolism;Metabolism	Global and overview maps;Metabolism of cofactors and vitamins;Metabolism of cofactors and vitamins	ko01100//Metabolic pathways;ko00790//Folate biosynthesis;ko00730//Thiamine metabolism	K01077;K01077;K01077	-	GO:0042578//phosphoric ester hydrolase activity	GO:0006796//phosphate-containing compound metabolic process
LOC105223749	1498	1324	1340	1643	1354	3241	4099	2632	3139	3425	27.04	28.28	24.18	33.93	28.6	74.2	69.7	67.18	70.92	67.76	28.406	69.952	1.30017	1.90666e-67	5.90958e-66	ACAA2	PREDICTED: 3-ketoacyl-CoA thiolase, mitochondrial [Bactrocera dorsalis]	Metabolism;Metabolism;Metabolism;Metabolism;Metabolism	Global and overview maps;Global and overview maps;Lipid metabolism;Amino acid metabolism;Lipid metabolism	ko01100//Metabolic pathways;ko01212//Fatty acid metabolism;ko00071//Fatty acid degradation;ko00280//Valine, leucine and isoleucine degradation;ko00062//Fatty acid elongation	K07508;K07508;K07508;K07508;K07508	GO:0043231//intracellular membrane-bounded organelle;GO:0043232//intracellular non-membrane-bounded organelle;GO:0043234//protein complex	GO:0016746//transferase activity, transferring acyl groups	GO:0009062//fatty acid catabolic process
LOC105230454	12301	10216	12127	10393	10672	4004	6975	3887	4352	5181	248.01	243.79	244.01	239.06	251.42	102.27	132.86	111.26	109.88	114.65	245.258	114.184	-1.10294	2.14007e-67	6.61442e-66	kra	PREDICTED: protein krasavietz [Bactrocera dorsalis]	-	-	-	-	-	-	-
LOC105221812	2690	2134	2937	2157	2305	783	1240	659	725	865	31.95	30.04	34.82	29.42	32.12	11.91	13.94	11.16	10.77	11.27	31.67	11.81	-1.42311	3.13474e-67	9.66165e-66	GL21140	PREDICTED: serine/threonine-protein kinase GL21140 [Bactrocera dorsalis]	-	-	-	-	-	-	-
LOC105223186	9192	7771	9067	7291	7463	2632	4646	2384	2753	3087	103.04	103.08	101.59	93.5	97.89	37.42	49.06	37.79	38.62	37.93	99.82	40.164	-1.31343	3.25768e-67	1.00126e-65	Hex-t2	PREDICTED: hexokinase type 2 [Bactrocera dorsalis]	Metabolism;Metabolism;Organismal Systems;Environmental Information Processing;Metabolism;Metabolism;Human Diseases;Metabolism;Metabolism;Metabolism;Human Diseases;Organismal Systems;Metabolism	Global and overview maps;Global and overview maps;Endocrine system;Signal transduction;Carbohydrate metabolism;Carbohydrate metabolism;Cancers;Carbohydrate metabolism;Carbohydrate metabolism;Carbohydrate metabolism;Endocrine and metabolic diseases;Digestive system;Biosynthesis of other secondary metabolites	ko01100//Metabolic pathways;ko01200//Carbon metabolism;ko04910//Insulin signaling pathway;ko04066//HIF-1 signaling pathway;ko00010//Glycolysis / Gluconeogenesis;ko00520//Amino sugar and nucleotide sugar metabolism;ko05230//Central carbon metabolism in cancer;ko00500//Starch and sucrose metabolism;ko00052//Galactose metabolism;ko00051//Fructose and mannose metabolism;ko04930//Type II diabetes mell…	K00844;K00844;K00844;K00844;K00844;K00844;K00844;K00844;K00844;K00844;K00844;K00844;K00844	-	GO:0016773//phosphotransferase activity, alcohol group as acceptor;GO:0032550//purine ribonucleoside binding	GO:0006090//pyruvate metabolic process;GO:0016310//phosphorylation;GO:0044238//primary metabolic process
LOC105223175	993	802	770	749	712	213	312	165	207	279	16.39	15.66	12.7	14.14	13.75	4.46	4.85	3.85	4.28	5.05	14.528	4.498	-1.69148	5.25154e-67	1.60514e-65	l(1)G0020	PREDICTED: LOW QUALITY PROTEIN: RNA cytidine acetyltransferase [Bactrocera dorsalis]	Genetic Information Processing	Translation	ko03008//Ribosome biogenesis in eukaryotes	K14521	-	-	-
LOC105233734	436	379	385	434	290	1169	1506	773	1166	1270	5.3	5.45	4.68	6.04	4.13	18.02	17.25	13.29	17.74	16.92	5.12	16.644	1.70079	6.42459e-67	1.95826e-65	ANPEP	PREDICTED: aminopeptidase N [Bactrocera dorsalis]	Metabolism;Metabolism;Organismal Systems;Organismal Systems	Global and overview maps;Metabolism of other amino acids;Endocrine system;Immune system	ko01100//Metabolic pathways;ko00480//Glutathione metabolism;ko04614//Renin-angiotensin system;ko04640//Hematopoietic cell lineage	K11140;K11140;K11140;K11140	-	GO:0046914//transition metal ion binding;GO:0070011//peptidase activity, acting on L-amino acid peptides	-
LOC105234068	714	443	660	610	581	104	125	70	106	70	7.48	5.49	6.92	7.32	7.13	1.38	1.23	1.04	1.39	0.81	6.868	1.17	-2.55338	1.1743e-66	3.55967e-65	Prdm1	PREDICTED: zinc finger protein rotund isoform X1 [Bactrocera latifrons]	-	-	-	-	GO:0043231//intracellular membrane-bounded organelle	GO:0001071//nucleic acid binding transcription factor activity;GO:0043169//cation binding;GO:0097159//organic cyclic compound binding	GO:0010468//regulation of gene expression;GO:0034645//cellular macromolecule biosynthetic process;GO:0044763//single-organism cellular process
LOC105227197	27	28	28	33	36	295	339	186	258	216	0.66	0.81	0.68	0.92	1.03	9.16	7.82	6.44	7.9	5.79	0.82	7.422	3.17811	1.37915e-66	4.16919e-65	Slc22a3	PREDICTED: solute carrier family 22 member 3 [Bactrocera dorsalis]	-	-	-	-	GO:0031224//intrinsic component of membrane	GO:0005215//transporter activity	GO:0044763//single-organism cellular process
LOC105224423	513	418	555	425	425	1070	1451	1084	1180	1116	15.68	15.12	16.95	14.86	15.2	41.47	41.77	46.84	45.13	37.38	15.562	42.518	1.45005	1.81956e-66	5.47057e-65	Slc25a17	PREDICTED: peroxisomal membrane protein PMP34 [Bactrocera dorsalis]	Cellular Processes	Transport and catabolism	ko04146//Peroxisome	K13354	GO:0031224//intrinsic component of membrane	-	-
MSTRG.5201	205	139	119	177	129	814	871	703	608	840	10.23	8.21	5.92	10.14	7.53	51.52	40.97	49.63	38.02	45.99	8.406	45.226	2.42766	2.0322e-66	6.09328e-65	ACHE	LOW QUALITY PROTEIN: esterase FE4 [Bactrocera dorsalis]	-	-	-	-	-	GO:0003824//catalytic activity	-
LOC105231911	359	267	345	275	288	46	77	50	47	74	18.39	16.18	17.66	16.12	17.26	2.99	3.72	3.62	3.01	4.15	17.122	3.498	-2.29125	2.5971e-66	7.74496e-65	--	CG11076, partial [Drosophila busckii]	-	-	-	-	-	-	-
LOC105228937	1390	1110	1149	927	876	179	280	197	232	304	17.15	16.2	14.17	13.08	12.64	2.8	3.25	3.44	3.58	4.11	14.648	3.436	-2.0919	3.66227e-66	1.0892e-64	--	PREDICTED: nose resistant to fluoxetine protein 6 [Bactrocera dorsalis]	-	-	-	-	-	-	-
LOC105231362	9275	7703	8814	7693	7943	2892	4939	2481	3211	3968	135.15	133.28	128.93	128.44	135.54	53.61	67.79	51.06	58.61	63.7	132.268	58.954	-1.1658	4.20202e-66	1.24637e-64	Ipo7	PREDICTED: importin-7 isoform X1 [Bactrocera dorsalis]	Environmental Information Processing	Signal transduction	ko04013//MAPK signaling pathway - fly	K20223	-	GO:0017016//Ras GTPase binding	-
LOC105224937	513	457	442	430	396	52	124	40	62	76	12.45	13.13	10.72	11.94	11.25	1.6	2.84	1.37	1.88	2.02	11.898	1.942	-2.6151	6.62111e-66	1.95864e-64	Tex10	PREDICTED: testis-expressed sequence 10 protein [Bactrocera dorsalis]	-	-	-	-	-	-	-
LOC105231640	1561	1351	1575	1322	1409	515	753	388	428	552	17.59	18.02	17.74	17.04	18.58	7.36	7.99	6.18	6.04	6.82	17.794	6.878	-1.37133	7.00017e-66	2.06524e-64	LDLR	Very low-density lipoprotein receptor, partial [Bactrocera dorsalis]	-	-	-	-	-	-	-
LOC105230533	1659	1522	1661	1363	1467	2778	3471	2213	2783	3446	30.73	33.47	30.72	28.83	31.82	65.37	60.63	57.82	64.49	70.05	31.114	63.672	1.0331	7.3763e-66	2.1704e-64	Clcn7	PREDICTED: H(+)/Cl(-) exchange transporter 7 [Bactrocera dorsalis]	-	-	-	-	GO:0031224//intrinsic component of membrane	GO:0005254//chloride channel activity	GO:0015698//inorganic anion transport;GO:0034765//regulation of ion transmembrane transport
LOC105223629	14	30	14	53	17	2442	3029	1814	1984	2022	0.28	0.7	0.28	1.19	0.39	60.96	56.17	50.49	48.88	43.62	0.568	52.024	6.51714	8.50463e-66	2.49575e-64	SCARB1	PREDICTED: lysosome membrane protein 2 [Bactrocera dorsalis]	-	-	-	-	GO:0031224//intrinsic component of membrane	-	-
LOC105233196	891	684	767	739	775	149	287	119	131	182	15.77	14.33	13.57	14.97	16.05	3.35	4.79	2.98	2.9	3.53	14.938	3.51	-2.08944	9.63586e-66	2.82022e-64	EXOSC10	PREDICTED: exosome component 10 [Bactrocera dorsalis]	Genetic Information Processing	Folding, sorting and degradation	ko03018//RNA degradation	K12591	GO:0000178//exosome (RNase complex)	GO:0004527//exonuclease activity;GO:0097159//organic cyclic compound binding	GO:0010467//gene expression;GO:0090304//nucleic acid metabolic process
LOC105229574	2491	2162	2268	2315	2073	869	1215	762	1014	1059	32.67	34.1	29.68	34.75	32.41	14.52	15.05	14.26	16.64	15.24	32.722	15.142	-1.11171	1.11074e-65	3.23374e-64	Orct	PREDICTED: organic cation transporter protein [Bactrocera dorsalis]	-	-	-	-	-	GO:0005215//transporter activity	GO:0044763//single-organism cellular process
LOC109579399	11	14	20	13	12	199	266	127	143	201	0.54	0.81	0.98	0.73	0.69	12.31	12.23	8.76	8.73	10.75	0.75	10.556	3.81503	1.39366e-65	4.04674e-64	--	PREDICTED: shematrin-like protein 2 [Bactrocera dorsalis]	-	-	-	-	-	-	-
LOC105230604	676	473	606	563	469	91	189	86	126	146	20.3	16.81	18.19	19.34	16.48	3.47	5.35	3.65	4.73	4.8	18.224	4.4	-2.05026	2.97364e-65	8.61185e-64	--	GM02932p [Drosophila melanogaster]	-	-	-	-	-	-	-
LOC105228924	1242	1182	1370	1202	1168	2454	3024	2322	2328	2736	18.1	20.38	19.95	20.04	19.93	45.35	41.51	47.82	42.46	43.68	19.68	44.164	1.16614	4.25336e-65	1.22857e-63	TMEM259	Membralin [Bactrocera dorsalis]	-	-	-	-	-	-	-
LOC105230296	495	434	500	500	413	1103	1275	875	1151	1106	25.66	26.6	25.89	29.63	25.03	72.45	62.23	64.11	74.65	62.8	26.562	67.248	1.34013	5.99132e-65	1.72606e-63	PNPO	PREDICTED: pyridoxine-5'-phosphate oxidase isoform X1 [Bactrocera dorsalis]	Metabolism;Metabolism	Global and overview maps;Metabolism of cofactors and vitamins	ko01100//Metabolic pathways;ko00750//Vitamin B6 metabolism	K00275;K00275	-	GO:0016491//oxidoreductase activity;GO:0032553//ribonucleotide binding	GO:0008614//pyridoxine metabolic process;GO:0009108//coenzyme biosynthetic process
LOC105232827	963	700	870	765	854	277	367	219	273	314	12.93	11.12	11.67	11.75	13.41	4.71	4.64	4.16	4.59	4.62	12.176	4.544	-1.42201	9.31359e-65	2.6762e-63	Smyd4	PREDICTED: SET and MYND domain-containing protein 4 [Bactrocera dorsalis]	-	-	-	-	-	-	-
LOC105223024	807	674	802	666	611	1412	1778	1304	1322	1483	11.52	11.39	11.44	10.87	10.2	25.53	23.91	26.33	23.61	23.2	11.084	24.516	1.14524	1.06522e-64	3.05289e-63	USH1C	Harmonin, partial [Bactrocera dorsalis]	-	-	-	-	-	-	-
LOC105225706	227	142	188	211	153	519	686	445	472	561	3.05	2.26	2.52	3.24	2.4	8.84	8.68	8.45	7.93	8.25	2.694	8.43	1.64578	2.29274e-64	6.5539e-63	-	-	-	-	-	-	-	-	-
LOC105232153	445	352	408	393	379	713	954	676	777	920	12.89	12.07	11.81	13.02	12.85	26.19	26.03	27.69	28.17	29.21	12.528	27.458	1.13207	2.95184e-64	8.41617e-63	CHIA	PREDICTED: chitinase-3-like protein 2 [Bactrocera dorsalis]	Metabolism;Metabolism	Global and overview maps;Carbohydrate metabolism	ko01100//Metabolic pathways;ko00520//Amino sugar and nucleotide sugar metabolism	K01183;K01183	-	GO:0004553//hydrolase activity, hydrolyzing O-glycosyl compounds;GO:0043169//cation binding;GO:0097367//carbohydrate derivative binding	GO:0006026//aminoglycan catabolic process;GO:0044238//primary metabolic process
LOC105224514	1215	1183	1074	1398	914	3820	4380	3267	3522	3721	39.65	45.69	35.03	52.2	34.9	158.1	134.65	150.75	143.85	133.09	41.494	144.088	1.79598	3.62892e-64	1.032e-62	ALDH2	PREDICTED: LOW QUALITY PROTEIN: aldehyde dehydrogenase X, mitochondrial [Bactrocera dorsalis]	Metabolism;Metabolism;Metabolism;Metabolism;Metabolism;Metabolism;Metabolism;Metabolism;Metabolism;Metabolism;Metabolism;Metabolism;Metabolism	Global and overview maps;Carbohydrate metabolism;Lipid metabolism;Amino acid metabolism;Carbohydrate metabolism;Amino acid metabolism;Metabolism of terpenoids and polyketides;Lipid metabolism;Amino acid metabolism;Carbohydrate metabolism;Amino acid metabolism;Metabolism of other amino acids;Amino acid metabolism	ko01100//Metabolic pathways;ko00010//Glycolysis / Gluconeogenesis;ko00561//Glycerolipid metabolism;ko00310//Lysine degradation;ko00620//Pyruvate metabolism;ko00330//Arginine and proline metabolism;ko00981//Insect hormone biosynthesis;ko00071//Fatty acid degradation;ko00280//Valine, leucine and isoleucine degradation;ko00053//Ascorbate and aldarate metabolism;ko00380//Tryptophan metabolism;ko00410…	K00128;K00128;K00128;K00128;K00128;K00128;K00128;K00128;K00128;K00128;K00128;K00128;K00128	-	GO:0016903//oxidoreductase activity, acting on the aldehyde or oxo group of donors	GO:0044710//single-organism metabolic process
LOC105230198	2992	2838	3273	3011	2244	9567	10953	9849	7658	10266	51.73	58.07	56.56	59.56	45.4	209.79	178.41	240.79	165.71	194.55	54.264	197.85	1.86634	5.13744e-64	1.45724e-62	Cyp6a8	PREDICTED: probable cytochrome P450 6a13 [Bactrocera dorsalis]	-	-	-	-	-	-	-
LOC105233681	831	661	716	625	648	234	335	196	221	257	20.16	18.98	17.36	17.35	18.39	7.2	7.66	6.72	6.71	6.83	18.448	7.024	-1.3931	5.68892e-64	1.60953e-62	Dbp73D	PREDICTED: probable ATP-dependent RNA helicase Dbp73D [Bactrocera dorsalis]	-	-	-	-	-	GO:0017111//nucleoside-triphosphatase activity;GO:0032550//purine ribonucleoside binding	-
LOC105223448	2320	2199	2527	2457	2400	803	1215	715	913	975	45.27	50.77	49.28	54.85	54.79	19.87	22.33	19.73	22.29	20.85	50.992	21.014	-1.27892	6.17094e-64	1.74144e-62	Pnpla2	PREDICTED: patatin-like phospholipase domain-containing protein 3 [Bactrocera dorsalis]	-	-	-	-	-	-	-
LOC105230179	2329	1896	2248	2071	2153	882	1150	779	888	1085	19.9	19.19	19.19	20.11	21.46	9.43	9.21	9.3	9.43	10.06	19.97	9.486	-1.07396	6.69301e-64	1.88394e-62	mahj	PREDICTED: protein mahjong isoform X1 [Bactrocera dorsalis]	-	-	-	-	-	-	-
LOC105228642	427	344	356	339	369	822	1057	762	1012	1030	31.02	29.57	25.85	28.18	31.37	75.73	72.34	78.27	92.01	82.01	29.198	80.072	1.45543	7.93948e-64	2.22911e-62	CG5532	PREDICTED: transmembrane protein 14 homolog [Bactrocera dorsalis]	-	-	-	-	-	-	-
LOC105222070	3	2	0	1	5	1156	1998	1968	3830	2852	0.15	0.12	0	0.06	0.3	74.81	96.04	141.99	244.59	159.5	0.126	143.386	10.1523	8.11822e-64	2.27351e-62	Semp1	Zinc metalloproteinase nas-4, partial [Bactrocera dorsalis]	-	-	-	-	-	-	-
LOC105228811	22	28	11	30	6	367	382	257	277	358	0.84	1.27	0.42	1.31	0.27	17.79	13.76	13.89	13.25	15	0.822	14.738	4.16426	1.27287e-63	3.55565e-62	Bbox1	PREDICTED: gamma-butyrobetaine dioxygenase [Bactrocera dorsalis]	Metabolism	Amino acid metabolism	ko00310//Lysine degradation	K00471	-	GO:0016491//oxidoreductase activity	GO:0044710//single-organism metabolic process
LOC105223615	436	289	302	360	423	1285	1475	1025	1217	1320	6.51	5.1	4.5	6.15	7.39	24.32	20.74	21.63	22.73	21.59	5.93	22.202	1.90459	1.53307e-63	4.2717e-62	SLC5A8	PREDICTED: sodium-coupled monocarboxylate transporter 1 [Bactrocera dorsalis]	-	-	-	-	GO:0031224//intrinsic component of membrane	-	GO:0044763//single-organism cellular process;GO:0051234//establishment of localization
LOC105226366	179	123	142	148	114	408	590	349	511	616	2.37	1.92	1.88	2.24	1.76	6.84	7.35	6.52	8.45	8.92	2.034	7.616	1.90471	1.61702e-63	4.49425e-62	Skeletor	PREDICTED: protein Skeletor, isoforms B/C [Bactrocera dorsalis]	-	-	-	-	-	-	-
LOC105230475	2399	2045	2340	2341	2152	4578	5601	3613	4012	4276	41.58	42.25	40.5	46.7	43.96	100.53	90.72	89.49	87.18	81.52	42.998	89.888	1.06386	2.98378e-63	8.25138e-62	abcb6	PREDICTED: ATP-binding cassette sub-family B member 6, mitochondrial [Bactrocera dorsalis]	Environmental Information Processing	Membrane transport	ko02010//ABC transporters	K05661	-	-	-
LOC105225699	1029	878	1133	889	951	341	511	286	327	388	29.27	29.57	32.24	28.95	31.68	12.3	13.69	11.49	11.65	12.1	30.342	12.246	-1.30901	3.00028e-63	8.27628e-62	--	PREDICTED: serine/threonine-protein kinase CST20 isoform X1 [Ceratitis capitata]	-	-	-	-	-	-	-
LOC105229745	1196	891	1077	1086	774	3254	3667	3121	2723	3089	31.56	27.82	28.4	32.78	23.9	108.88	91.15	116.44	89.92	89.33	28.892	99.144	1.77886	3.08713e-63	8.49461e-62	CG8745	PREDICTED: alanine--glyoxylate aminotransferase 2-like [Bactrocera dorsalis]	Metabolism;Metabolism	Global and overview maps;Lipid metabolism	ko01100//Metabolic pathways;ko00564//Glycerophospholipid metabolism	K14286;K14286	-	GO:0016769//transferase activity, transferring nitrogenous groups;GO:0043168//anion binding	-
LOC105230920	88	72	64	92	98	345	449	324	415	494	2.28	2.21	1.66	2.72	2.97	11.33	10.95	11.86	13.44	14.02	2.368	12.32	2.37926	3.45593e-63	9.48576e-62	MFSD10	PREDICTED: major facilitator superfamily domain-containing protein 10 [Bactrocera dorsalis]	-	-	-	-	GO:0031224//intrinsic component of membrane	GO:0015144//carbohydrate transmembrane transporter activity	GO:0044763//single-organism cellular process
LOC105232161	2605	2195	2880	2379	2409	1013	1145	774	870	1033	175.84	175.33	194.3	183.71	190.27	86.72	72.81	73.87	73.49	76.42	183.89	76.662	-1.26226	7.5139e-63	2.05728e-61	Vha13	PREDICTED: V-type proton ATPase subunit G [Bactrocera dorsalis]	Metabolism;Human Diseases;Metabolism;Environmental Information Processing;Cellular Processes;Human Diseases;Organismal Systems;Human Diseases;Human Diseases;Organismal Systems	Global and overview maps;Infectious diseases;Energy metabolism;Signal transduction;Transport and catabolism;Infectious diseases;Nervous system;Infectious diseases;Immune diseases;Excretory system	ko01100//Metabolic pathways;ko05165//Human papillomavirus infection;ko00190//Oxidative phosphorylation;ko04150//mTOR signaling pathway;ko04145//Phagosome;ko05110//Vibrio cholerae infection;ko04721//Synaptic vesicle cycle;ko05120//Epithelial cell signaling in Helicobacter pylori infection;ko05323//Rheumatoid arthritis;ko04966//Collecting duct acid secretion	K02152;K02152;K02152;K02152;K02152;K02152;K02152;K02152;K02152;K02152	GO:0033176//proton-transporting V-type ATPase complex	GO:0003824//catalytic activity;GO:0022857//transmembrane transporter activity	GO:0006818//hydrogen transport;GO:0044763//single-organism cellular process
LOC105229822	1003	837	964	797	778	186	367	149	194	263	26.58	26.25	25.54	24.17	24.13	6.25	9.16	5.58	6.43	7.64	25.334	7.012	-1.85318	8.54126e-63	2.33278e-61	GCLM	PREDICTED: glutamate--cysteine ligase regulatory subunit [Bactrocera dorsalis]	Metabolism;Metabolism;Metabolism;Cellular Processes	Global and overview maps;Metabolism of other amino acids;Amino acid metabolism;Cell growth and death	ko01100//Metabolic pathways;ko00480//Glutathione metabolism;ko00270//Cysteine and methionine metabolism;ko04216//Ferroptosis	K11205;K11205;K11205;K11205	GO:0044444//cytoplasmic part	GO:0019899//enzyme binding	GO:0006749//glutathione metabolic process;GO:0007613//memory;GO:0008306//associative learning;GO:0030534//adult behavior;GO:0033554//cellular response to stress;GO:0035227//regulation of glutamate-cysteine ligase activity;GO:0098754//detoxification
LOC105222535	66	62	45	74	26	429	561	379	446	394	1.99	2.21	1.37	2.56	0.93	16.7	16.25	16.48	17.15	13.27	1.812	15.97	3.13971	8.78103e-63	2.38645e-61	GNBP1	PREDICTED: gram-negative bacteria-binding protein 1 isoform X1 [Bactrocera dorsalis]	Organismal Systems	Immune system	ko04624//Toll and Imd signaling pathway	K20697	-	-	-
LOC105231807	143	119	129	109	71	676	1379	626	1223	1735	3.49	3.43	3.14	3.04	2.03	20.9	31.67	21.58	37.32	46.36	3.026	31.566	3.38289	1.56102e-62	4.23202e-61	--	hypothetical protein [Bactrocera dorsalis]	-	-	-	-	-	-	-
LOC105224781	1031	827	882	801	745	293	422	272	284	332	17.73	16.83	15.16	15.76	14.99	6.39	6.84	6.61	6.11	6.26	16.094	6.442	-1.32094	1.64295e-62	4.43234e-61	Cherp	PREDICTED: calcium homeostasis endoplasmic reticulum protein [Bactrocera dorsalis]	Genetic Information Processing	Transcription	ko03040//Spliceosome	K12841	-	GO:0003676//nucleic acid binding	GO:0010467//gene expression
LOC105221985	2141	1872	2113	1945	1952	3518	4616	2649	3635	4538	65.92	68.16	65.55	69.01	70.85	141.11	136.67	118.07	142.69	156.05	67.898	138.918	1.03279	1.68588e-62	4.53707e-61	Spn88Ea	PREDICTED: serine protease inhibitor 88Ea [Bactrocera dorsalis]	-	-	-	-	-	-	-
LOC105228674	825	662	740	571	610	1579	1812	1398	1464	1884	44.75	42.5	40.12	35.44	38.72	108.63	92.6	107.23	99.39	112.01	40.306	103.972	1.36713	1.75232e-62	4.70442e-61	CG17333	PREDICTED: probable 6-phosphogluconolactonase [Bactrocera dorsalis]	Metabolism;Metabolism;Metabolism	Global and overview maps;Global and overview maps;Carbohydrate metabolism	ko01100//Metabolic pathways;ko01200//Carbon metabolism;ko00030//Pentose phosphate pathway	K01057;K01057;K01057	-	-	-
LOC105232048	1715	1380	1903	1503	1616	609	847	508	628	718	24.11	23.02	26.83	24	26.44	10.89	11.07	10.04	11.06	11.07	24.88	10.826	-1.20049	2.42295e-62	6.48903e-61	csw	PREDICTED: tyrosine-protein phosphatase corkscrew isoform X1 [Bactrocera dorsalis]	Human Diseases;Environmental Information Processing;Environmental Information Processing;Human Diseases;Environmental Information Processing;Organismal Systems;Human Diseases;Human Diseases;Organismal Systems;Human Diseases;Organismal Systems;Organismal Systems;Organismal Systems;Human Diseases;Organismal Systems;Environmental Information Processing	Cancers;Signal transduction;Signal transduction;Infectious diseases;Signal transduction;Development;Endocrine and metabolic diseases;Infectious diseases;Nervous system;Cancers;Immune system;Immune system;Immune system;Cancers;Endocrine system;Signal transduction	ko05205//Proteoglycans in cancer;ko04013//MAPK signaling pathway - fly;ko04014//Ras signaling pathway;ko05168//Herpes simplex infection;ko04072//Phospholipase D signaling pathway;ko04360//Axon guidance;ko04931//Insulin resistance;ko05120//Epithelial cell signaling in Helicobacter pylori infection;ko04722//Neurotrophin signaling pathway;ko05211//Renal cell carcinoma;ko04670//Leukocyte transendothe…	K07293;K07293;K07293;K07293;K07293;K07293;K07293;K07293;K07293;K07293;K07293;K07293;K07293;K07293;K07293;K07293	-	-	-
LOC105223902	1572	1399	1383	1340	1279	522	745	467	486	642	52.49	55.28	46.16	51.19	49.97	22.1	23.43	22.05	20.31	23.49	51.018	22.276	-1.19552	2.5506e-62	6.81437e-61	GA19813	PREDICTED: ribosome biogenesis protein WDR12 homolog [Bactrocera dorsalis]	-	-	-	-	GO:0030684//preribosome;GO:0031981//nuclear lumen;GO:0043232//intracellular non-membrane-bounded organelle	GO:0005488//binding	GO:0000460//maturation of 5.8S rRNA
LOC105232316	2591	2664	1815	2467	2395	15135	12313	8973	10325	13268	130.22	158.44	91.17	141.85	140.85	964.68	582.96	637.65	649.43	730.85	132.506	713.114	2.42808	4.40637e-62	1.17439e-60	--	PREDICTED: uncharacterized protein LOC105232316 [Bactrocera dorsalis]	-	-	-	-	-	-	-
LOC105225028	2732	2189	2718	2180	2299	4664	5266	3975	4815	5287	130.37	124.26	127.41	119.92	129.2	286.82	242.34	274.06	295.28	284.2	126.232	276.54	1.13141	5.88766e-62	1.56541e-60	GPXMC1	PREDICTED: probable phospholipid hydroperoxide glutathione peroxidase isoform X1 [Bactrocera dorsalis]	Human Diseases;Metabolism;Organismal Systems;Human Diseases;Metabolism	Neurodegenerative diseases;Metabolism of other amino acids;Endocrine system;Neurodegenerative diseases;Lipid metabolism	ko05016//Huntington disease;ko00480//Glutathione metabolism;ko04918//Thyroid hormone synthesis;ko05014//Amyotrophic lateral sclerosis (ALS);ko00590//Arachidonic acid metabolism	K00432;K00432;K00432;K00432;K00432	-	GO:0004601//peroxidase activity	GO:0006950//response to stress;GO:0044710//single-organism metabolic process
LOC105229262	1642	1161	1515	1326	1307	364	666	287	390	422	10.89	9.14	10.03	10.1	10.1	3.04	4.09	2.7	3.13	3.04	10.052	3.2	-1.65134	7.4015e-62	1.96318e-60	ex	PREDICTED: protein expanded [Bactrocera dorsalis]	Environmental Information Processing;Environmental Information Processing	Signal transduction;Signal transduction	ko04391//Hippo signaling pathway -fly;ko04392//Hippo signaling pathway - multiple species	K16683;K16683	-	-	-
LOC105229306	4221	3748	4391	3733	4084	1639	2363	1407	1533	1713	86.67	91.07	90.11	87.69	98.12	42.68	45.71	40.85	39.39	38.55	90.732	41.436	-1.13073	7.5532e-62	1.99861e-60	Gs1	PREDICTED: glutamine synthetase 1, mitochondrial [Bactrocera dorsalis]	Metabolism;Metabolism;Cellular Processes;Organismal Systems;Organismal Systems;Metabolism;Metabolism;Metabolism;Metabolism	Global and overview maps;Global and overview maps;Cell growth and death;Nervous system;Nervous system;Carbohydrate metabolism;Amino acid metabolism;Energy metabolism;Amino acid metabolism	ko01100//Metabolic pathways;ko01230//Biosynthesis of amino acids;ko04217//Necroptosis;ko04724//Glutamatergic synapse;ko04727//GABAergic synapse;ko00630//Glyoxylate and dicarboxylate metabolism;ko00250//Alanine, aspartate and glutamate metabolism;ko00910//Nitrogen metabolism;ko00220//Arginine biosynthesis	K01915;K01915;K01915;K01915;K01915;K01915;K01915;K01915;K01915	-	GO:0016211//ammonia ligase activity;GO:0032550//purine ribonucleoside binding	GO:0006541//glutamine metabolic process
LOC105229684	45	49	28	51	31	1925	2959	2287	6902	5670	5.23	6.74	3.25	6.78	4.21	283.62	323.83	375.67	1003.51	721.95	5.242	541.716	6.69128	7.77148e-62	2.05145e-60	--	PREDICTED: uncharacterized protein LOC105229684 [Bactrocera dorsalis]	-	-	-	-	-	-	-
LOC105222634	86	109	102	67	72	1610	2770	1332	785	1642	1.91	2.86	2.27	1.7	1.88	45.3	57.93	41.83	21.81	39.96	2.124	41.366	4.28359	1.08094e-61	2.84655e-60	AGAP009593	PREDICTED: carboxypeptidase B [Bactrocera dorsalis]	-	-	-	-	-	GO:0008235//metalloexopeptidase activity;GO:0046914//transition metal ion binding	GO:0019538//protein metabolic process
LOC105224739	2253	1861	2242	1866	1699	540	956	403	537	579	32.69	31.95	32.51	30.98	28.85	9.94	13.07	8.27	9.75	9.21	31.396	10.048	-1.64367	1.14545e-61	3.00926e-60	-	-	-	-	-	-	-	-	-
LOC105223358	7	6	2	4	1	1262	2535	1022	3891	4222	0.49	0.5	0.14	0.32	0.08	111.71	166.68	100.86	339.88	322.97	0.306	208.42	9.41175	2.00721e-61	5.2607e-60	--	PREDICTED: hepatic lectin-like [Bactrocera dorsalis]	-	-	-	-	-	-	-
LOC105232976	4186	3111	3916	3074	3394	854	1698	776	910	1105	46.52	40.91	43.5	39.09	44.14	12.04	17.78	12.19	12.66	13.46	42.832	13.626	-1.65233	2.02414e-61	5.2925e-60	--	PREDICTED: rho GTPase-activating protein 17-like [Stomoxys calcitrans]	-	-	-	-	-	-	-
LOC105232835	3084	2184	2067	3336	2381	361	337	324	357	272	303.42	254.27	203.26	375.49	274.1	45.04	31.23	45.07	43.96	29.33	282.108	38.926	-2.85744	2.06407e-61	5.38415e-60	Ctla2a	PREDICTED: protein CTLA-2-alpha [Bactrocera dorsalis]	Cellular Processes;Human Diseases;Cellular Processes;Human Diseases;Cellular Processes;Cellular Processes;Human Diseases;Organismal Systems	Transport and catabolism;Cancers;Transport and catabolism;Cardiovascular diseases;Transport and catabolism;Cell growth and death;Immune diseases;Immune system	ko04142//Lysosome;ko05205//Proteoglycans in cancer;ko04140//Autophagy - animal;ko05418//Fluid shear stress and atherosclerosis;ko04145//Phagosome;ko04210//Apoptosis;ko05323//Rheumatoid arthritis;ko04612//Antigen processing and presentation	K01365;K01365;K01365;K01365;K01365;K01365;K01365;K01365	-	-	-
LOC105225618	34746	30428	37184	29138	33734	12030	19176	9938	11711	14459	512.45	531.18	549.45	490.13	582.69	226.29	268.75	207.9	216.69	235.72	533.18	231.07	-1.20629	2.23453e-61	5.81505e-60	Actn	PREDICTED: alpha-actinin, sarcomeric isoform X1 [Bactrocera dorsalis]	Human Diseases;Cellular Processes;Cellular Processes;Cellular Processes;Cellular Processes;Organismal Systems;Human Diseases;Human Diseases	Cancers;Cellular community - eukaryotes;Cell motility;Cellular community - eukaryotes;Cellular community - eukaryotes;Immune system;Infectious diseases;Immune diseases	ko05203//Viral carcinogenesis;ko04510//Focal adhesion;ko04810//Regulation of actin cytoskeleton;ko04530//Tight junction;ko04520//Adherens junction;ko04670//Leukocyte transendothelial migration;ko05146//Amoebiasis;ko05322//Systemic lupus erythematosus	K05699;K05699;K05699;K05699;K05699;K05699;K05699;K05699	GO:0005924//cell-substrate adherens junction;GO:0031674//I band	GO:0003779//actin binding;GO:0046872//metal ion binding	GO:0007015//actin filament organization;GO:0022607//cellular component assembly;GO:0031032//actomyosin structure organization
LOC105232739	1264	1030	1048	953	951	2066	2723	1680	1805	2073	54.14	52.2	44.86	46.7	47.66	112.22	109.87	101.74	96.75	97.31	49.112	103.578	1.07657	2.75913e-61	7.14655e-60	Glod4	PREDICTED: glyoxalase domain-containing protein 4 [Bactrocera dorsalis]	-	-	-	-	-	-	-
LOC105225836	510	364	431	442	411	798	1034	707	817	977	6.42	5.42	5.42	6.36	6.05	12.74	12.26	12.58	12.87	13.48	5.934	12.786	1.10749	5.72139e-61	1.47845e-59	FGFR2	Wsck [Drosophila buzzatii]	-	-	-	-	-	GO:0016740//transferase activity;GO:0032550//purine ribonucleoside binding	GO:0006464//cellular protein modification process
LOC105232277	575	645	606	616	493	1877	2368	1338	1881	2781	13.96	18.53	14.71	17.11	14.01	57.8	54.17	45.94	57.16	74.01	15.664	57.816	1.88402	1.20998e-60	3.1121e-59	Ance	PREDICTED: angiotensin-converting enzyme [Bactrocera dorsalis]	Human Diseases;Organismal Systems;Human Diseases;Organismal Systems	Infectious diseases;Endocrine system;Cardiovascular diseases;Endocrine system	ko05142//Chagas disease (American trypanosomiasis);ko04924//Renin secretion;ko05410//Hypertrophic cardiomyopathy (HCM);ko04614//Renin-angiotensin system	K01283;K01283;K01283;K01283	-	GO:0008238//exopeptidase activity;GO:0043169//cation binding	GO:0019538//protein metabolic process
LOC105232859	1121	876	1030	867	902	82	260	86	118	152	26.9	24.88	24.71	23.8	25.33	2.5	5.88	2.92	3.54	4	25.124	3.768	-2.7372	1.36736e-60	3.50848e-59	--	Zinc finger protein 425, partial [Bactrocera dorsalis]	-	-	-	-	-	-	-
LOC105233593	553	409	505	411	454	45	121	34	63	73	18.01	15.77	16.44	15.32	17.3	1.86	3.71	1.57	2.57	2.61	16.568	2.464	-2.74933	1.45916e-60	3.72693e-59	--	PREDICTED: DNA-directed RNA polymerase I subunit RPA43 [Bactrocera dorsalis]	Metabolism;Metabolism;Metabolism;Genetic Information Processing	Global and overview maps;Nucleotide metabolism;Nucleotide metabolism;Transcription	ko01100//Metabolic pathways;ko00230//Purine metabolism;ko00240//Pyrimidine metabolism;ko03020//RNA polymerase	K03004;K03004;K03004;K03004	-	-	-
LOC105226682	1614	1087	1413	895	861	3986	6031	3977	3571	4295	48.65	38.77	42.57	30.87	30.37	152.38	171.26	169.51	134.72	141.9	38.246	153.954	2.00912	1.59502e-60	4.06454e-59	Idgf6	PREDICTED: chitinase-like protein CG5210 [Bactrocera dorsalis]	-	-	-	-	GO:0044421//extracellular region part	GO:0004553//hydrolase activity, hydrolyzing O-glycosyl compounds;GO:0097367//carbohydrate derivative binding	GO:0006032//chitin catabolic process;GO:0044238//primary metabolic process
LOC105224712	866	863	946	845	814	1543	2205	1588	1629	2098	17.23	20.32	18.81	19.24	18.95	38.94	41.33	44.68	40.56	45.75	18.91	42.252	1.15987	1.81528e-60	4.61517e-59	stmA	PREDICTED: protein EFR3 homolog cmp44E isoform X1 [Ceratitis capitata]	-	-	-	-	-	-	-
LOC105225892	909	793	861	804	716	1506	2161	1522	1837	2336	26.3	27.15	24.9	26.61	24.24	55.26	58.9	62.27	66.52	74.08	25.84	63.406	1.29501	1.81986e-60	4.61618e-59	DERL2	PREDICTED: derlin-2 [Bactrocera dorsalis]	Genetic Information Processing	Folding, sorting and degradation	ko04141//Protein processing in endoplasmic reticulum	K13989	GO:0031227//intrinsic component of endoplasmic reticulum membrane	-	GO:0007165//signal transduction;GO:0009617//response to bacterium;GO:0043161//proteasome-mediated ubiquitin-dependent protein catabolic process
LOC105233653	1847	1340	1757	1506	1513	2905	4783	2406	2752	3340	16.21	13.96	15.46	15.14	15.56	32.42	39.86	29.89	30.44	32.4	15.266	33.002	1.11223	1.99696e-60	5.05377e-59	tim	PREDICTED: protein timeless [Bactrocera dorsalis]	Organismal Systems	Environmental adaptation	ko04711//Circadian rhythm - fly	K12074	-	-	-
LOC105234058	682	471	542	548	464	52	136	87	95	104	11.97	9.78	9.51	11	9.53	1.16	2.25	2.16	2.09	2	10.358	1.932	-2.42258	2.33577e-60	5.8977e-59	Rbm19	PREDICTED: probable RNA-binding protein 19 [Bactrocera dorsalis]	-	-	-	-	-	GO:0044822//poly(A) RNA binding	-
LOC105226502	814	667	757	697	651	95	255	112	133	151	46.03	44.63	42.78	45.09	43.07	6.81	13.58	8.95	9.41	9.36	44.32	9.622	-2.20355	3.1569e-60	7.95279e-59	--	Nucleolar protein 12, partial [Bactrocera dorsalis]	-	-	-	-	GO:0043232//intracellular non-membrane-bounded organelle	-	GO:0001558//regulation of cell growth;GO:0006997//nucleus organization;GO:0042127//regulation of cell proliferation;GO:0042981//regulation of apoptotic process;GO:0045570//regulation of imaginal disc growth
LOC105228428	2433	2291	2296	1996	1973	5471	6521	5081	5050	5024	56.71	63.18	53.91	52.77	54.52	157.17	138.01	159.54	143.39	125.94	56.218	144.81	1.36506	5.31035e-60	1.33169e-58	Nadk	PREDICTED: NAD kinase isoform X1 [Bactrocera dorsalis]	Metabolism;Metabolism	Global and overview maps;Metabolism of cofactors and vitamins	ko01100//Metabolic pathways;ko00760//Nicotinate and nicotinamide metabolism	K00858;K00858	-	GO:0016772//transferase activity, transferring phosphorus-containing groups	GO:0006739//NADP metabolic process
LOC105232682	228	189	241	205	190	396	636	389	441	526	8.71	8.54	9.2	8.96	8.49	19.18	22.89	21.01	21.08	22.02	8.78	21.236	1.27422	5.62863e-60	1.4083e-58	impad1	GM11612 [Drosophila sechellia]	Metabolism;Environmental Information Processing;Metabolism;Metabolism	Global and overview maps;Signal transduction;Carbohydrate metabolism;Energy metabolism	ko01100//Metabolic pathways;ko04070//Phosphatidylinositol signaling system;ko00562//Inositol phosphate metabolism;ko00920//Sulfur metabolism	K15759;K15759;K15759;K15759	GO:0044424//intracellular part	GO:0052834//inositol monophosphate phosphatase activity	GO:0046474//glycerophospholipid biosynthetic process;GO:0050794//regulation of cellular process
LOC105228972	1126	919	1080	970	976	404	524	372	384	487	74.5	71.95	71.42	73.42	75.56	33.9	32.66	34.8	31.79	35.31	73.37	33.692	-1.12278	1.20215e-59	3.00102e-58	fam136a	PREDICTED: protein FAM136A [Bactrocera dorsalis]	-	-	-	-	-	-	-
LOC105233052	438	417	380	388	327	968	1149	751	1021	1241	11.06	12.46	9.59	11.21	9.67	31.01	27.34	26.82	32.28	34.36	10.798	30.362	1.4915	1.44864e-59	3.60819e-58	slc39a11	PREDICTED: zinc transporter ZIP11 [Bactrocera dorsalis]	-	-	-	-	-	GO:0022890//inorganic cation transmembrane transporter activity	GO:0006812//cation transport;GO:0044763//single-organism cellular process
LOC105223919	261	215	302	243	235	521	725	510	605	731	8.02	7.82	9.28	8.54	8.45	20.31	20.99	22.16	23.27	24.62	8.422	22.27	1.40287	3.3377e-59	8.276e-58	AIG1	PREDICTED: androgen-induced gene 1 protein [Bactrocera dorsalis]	-	-	-	-	-	-	-
LOC105225972	22	16	6	22	12	144	300	184	223	241	0.74	0.63	0.2	0.84	0.47	6.11	9.45	8.7	9.34	8.84	0.576	8.488	3.88128	3.83751e-59	9.49396e-58	Glt	PREDICTED: glutactin-like [Bactrocera dorsalis]	-	-	-	-	-	GO:0003824//catalytic activity	-
LOC105232205	6	5	12	9	15	191	201	119	143	170	0.17	0.17	0.34	0.29	0.5	6.81	5.35	4.75	5.05	5.26	0.294	5.444	4.21078	6.55011e-59	1.61326e-57	--	PREDICTED: kelch-like protein diablo [Bactrocera dorsalis]	Human Diseases;Human Diseases;Genetic Information Processing;Human Diseases	Cancers;Cancers;Folding, sorting and degradation;Cardiovascular diseases	ko05200//Pathways in cancer;ko05225//Hepatocellular carcinoma;ko04120//Ubiquitin mediated proteolysis;ko05418//Fluid shear stress and atherosclerosis	K10456;K10456;K10456;K10456	-	-	-
LOC105224945	3514	2781	3365	3192	2650	5799	6624	4974	5451	6173	135.39	126.8	129.58	140.7	119.47	283.36	240.42	270.97	262.84	260.67	130.388	263.652	1.01582	6.89883e-59	1.69536e-57	Ghitm	PREDICTED: growth hormone-inducible transmembrane protein [Bactrocera dorsalis]	-	-	-	-	GO:0031224//intrinsic component of membrane	-	-
LOC105231093	1560	1327	1678	1349	1391	589	698	498	578	613	41.6	41.68	44.94	41.24	43.26	19.76	17.46	18.62	19.38	17.77	42.544	18.598	-1.19381	8.93146e-59	2.18999e-57	--	PREDICTED: N-acetyltransferase 6 isoform X1 [Bactrocera cucurbitae]	-	-	-	-	-	GO:0016407//acetyltransferase activity	-
LOC105232405	492	305	455	453	417	73	110	74	91	81	5.71	4.19	5.28	6.01	5.66	1.07	1.2	1.21	1.32	1.03	5.37	1.166	-2.20335	2.49521e-58	6.10469e-57	Dyrk2	PREDICTED: dual specificity tyrosine-phosphorylation-regulated kinase 2 [Bactrocera dorsalis]	-	-	-	-	GO:0044444//cytoplasmic part	GO:0004672//protein kinase activity;GO:0032550//purine ribonucleoside binding	GO:0006464//cellular protein modification process;GO:0006796//phosphate-containing compound metabolic process;GO:0007606//sensory perception of chemical stimulus;GO:0009314//response to radiation
LOC105227773	1401	1108	1265	1070	1005	3000	3389	2560	2366	2770	100.41	93.97	90.62	87.74	84.28	272.69	228.82	259.43	212.23	217.59	91.404	238.152	1.38155	3.98532e-58	9.7073e-57	--	PREDICTED: 23 kDa integral membrane protein [Bactrocera dorsalis]	-	-	-	-	-	-	-
LOC105224480	1131	775	829	932	808	118	296	141	160	198	34.9	28.3	25.57	32.9	29.18	4.62	8.6	6.15	6.18	6.7	30.17	6.45	-2.22574	5.30175e-58	1.28853e-56	Dronc	PREDICTED: caspase Dronc [Bactrocera dorsalis]	Cellular Processes;Cellular Processes	Cell growth and death;Cell growth and death	ko04214//Apoptosis - fly;ko04215//Apoptosis - multiple species	K20009;K20009	-	-	-
LOC105226148	1715	1315	1496	1373	1387	3052	4270	2716	2943	2777	33.12	30.05	28.88	30.34	31.34	74.75	77.69	74.17	71.16	58.78	30.746	71.31	1.21371	5.33788e-58	1.29447e-56	FAM57B	PREDICTED: protein FAM57B [Bactrocera dorsalis]	-	-	-	-	GO:0031224//intrinsic component of membrane	-	-
LOC105224936	989	833	876	900	899	269	362	271	258	359	26.77	26.68	23.7	27.87	28.47	9.23	9.23	10.37	8.74	10.65	26.698	9.644	-1.46903	9.93358e-58	2.40367e-56	Wdr46	PREDICTED: WD repeat-containing protein 46 [Bactrocera dorsalis]	-	-	-	-	-	-	-
LOC105226696	1675	1570	1783	1692	1420	3484	3950	2763	3590	3432	46.89	52.01	49.88	54.19	46.51	123.68	104.16	109.36	125.76	105.29	49.896	113.65	1.1876	1.50881e-57	3.64293e-56	-	-	-	-	-	-	-	-	-
LOC105226040	574	447	569	533	466	830	1327	853	950	1036	32.05	29.54	31.75	34.05	30.45	58.77	69.8	67.34	66.39	63.4	31.568	65.14	1.04508	1.76237e-57	4.24584e-56	--	PREDICTED: uncharacterized protein LOC105226040 [Bactrocera dorsalis]	-	-	-	-	-	-	-
LOC105224947	1633	1174	1101	1168	916	252	387	191	224	330	38.09	32.41	25.67	31.17	25	7.45	8.5	6.3	6.54	8.44	30.468	7.446	-2.03276	3.18516e-57	7.65688e-56	Cryl1	PREDICTED: lambda-crystallin homolog [Bactrocera dorsalis]	Metabolism;Metabolism	Global and overview maps;Carbohydrate metabolism	ko01100//Metabolic pathways;ko00040//Pentose and glucuronate interconversions	K13247;K13247	-	GO:0016614//oxidoreductase activity, acting on CH-OH group of donors;GO:0043168//anion binding;GO:0048037//cofactor binding	GO:0032787//monocarboxylic acid metabolic process
LOC105231956	783	532	676	666	581	87	217	113	115	158	51.87	41.7	44.76	50.47	45.03	7.31	13.54	10.58	9.53	11.47	46.766	10.486	-2.157	3.47692e-57	8.32198e-56	FCF1	PREDICTED: rRNA-processing protein FCF1 homolog [Bactrocera dorsalis]	Genetic Information Processing	Translation	ko03008//Ribosome biogenesis in eukaryotes	K14566	-	-	-
LOC105228374	939	833	1082	875	851	1666	2033	1400	1812	1973	35.56	37.41	41.09	37.97	37.96	80.64	72.68	75.49	86.17	82.29	37.998	79.454	1.0642	1.0668e-56	2.53687e-55	Updo	PREDICTED: uroporphyrinogen decarboxylase isoform X1 [Bactrocera dorsalis]	Metabolism;Metabolism	Global and overview maps;Metabolism of cofactors and vitamins	ko01100//Metabolic pathways;ko00860//Porphyrin and chlorophyll metabolism	K01599;K01599	-	GO:0016830//carbon-carbon lyase activity	GO:0006778//porphyrin-containing compound metabolic process
LOC105230744	395	381	299	384	335	1106	1298	911	1131	1028	6.9	7.87	5.22	7.67	6.84	24.49	21.35	22.49	24.71	19.67	6.9	22.542	1.70795	1.44396e-56	3.42638e-55	--	Leucine-rich repeat-containing protein 15 [Bactrocera dorsalis]	-	-	-	-	-	-	-
LOC105234033	1074	700	869	1142	802	2640	3232	2250	2358	2818	115.7	89.23	93.57	140.75	101.09	360.67	327.99	342.72	317.91	332.72	108.068	336.402	1.63825	1.52133e-56	3.60221e-55	PapD	PREDICTED: male accessory gland serine protease inhibitor-like [Bactrocera dorsalis]	-	-	-	-	-	-	-
LOC105223697	703	573	588	604	519	1746	2573	1517	2582	3314	38.25	36.9	31.98	37.6	33.04	120.49	131.89	116.71	175.83	197.63	35.554	148.51	2.06248	3.15928e-56	7.44861e-55	Spase25	PREDICTED: signal peptidase complex subunit 2 [Bactrocera dorsalis]	Genetic Information Processing	Folding, sorting and degradation	ko03060//Protein export	K12947	GO:0031224//intrinsic component of membrane	GO:0016787//hydrolase activity	GO:0016485//protein processing
LOC105232836	459	370	448	360	293	22	33	20	34	65	20.9	19.94	20.39	18.76	15.61	1.27	1.42	1.29	1.94	3.24	19.12	1.832	-3.38359	5.0481e-56	1.18512e-54	-	-	-	-	-	-	-	-	-
LOC105223708	3054	2532	2708	2964	2476	813	1076	622	928	1160	24.18	23.72	21.43	26.85	22.94	8.16	8.03	6.96	9.2	10.07	23.824	8.484	-1.4896	5.85714e-56	1.37214e-54	-	-	-	-	-	-	-	-	-
LOC109579967	607	554	679	807	633	95	61	35	40	52	20.8	22.47	23.26	31.62	25.38	4.13	1.97	1.7	1.72	1.95	24.706	2.294	-3.42892	6.60093e-56	1.54311e-54	--	PREDICTED: vacuolar protein sorting-associated protein 28-like [Bactrocera cucurbitae]	-	-	-	-	-	-	-
LOC105227980	3190	2317	2746	2382	2616	5975	8443	4321	5128	5502	64.19	55.17	55.23	54.84	61.59	152.48	160.04	122.94	129.14	121.34	58.204	137.188	1.23696	7.20136e-56	1.67991e-54	AcCoAS	PREDICTED: acetyl-coenzyme A synthetase [Bactrocera dorsalis]	Metabolism;Metabolism;Metabolism;Metabolism;Metabolism;Metabolism	Global and overview maps;Global and overview maps;Carbohydrate metabolism;Carbohydrate metabolism;Carbohydrate metabolism;Carbohydrate metabolism	ko01100//Metabolic pathways;ko01200//Carbon metabolism;ko00010//Glycolysis / Gluconeogenesis;ko00620//Pyruvate metabolism;ko00630//Glyoxylate and dicarboxylate metabolism;ko00640//Propanoate metabolism	K01895;K01895;K01895;K01895;K01895;K01895	-	GO:0016405//CoA-ligase activity;GO:0032550//purine ribonucleoside binding	GO:0006083//acetate metabolic process
LOC105233208	2255	1891	1954	1726	1891	3495	5112	2869	3099	3736	39.87	39.63	34.58	34.97	39.13	78.39	85.21	71.82	68.66	72.45	37.636	75.306	1.00065	7.48776e-56	1.74304e-54	QSOX1	PREDICTED: sulfhydryl oxidase 1 [Bactrocera dorsalis]	-	-	-	-	-	GO:0016670//oxidoreductase activity, acting on a sulfur group of donors, oxygen as acceptor	GO:0019725//cellular homeostasis;GO:0044710//single-organism metabolic process
LOC105222200	959	746	788	781	779	250	401	193	269	331	15.57	14.33	12.78	14.51	14.8	5.14	6.13	4.42	5.47	5.88	14.398	5.408	-1.4127	7.85552e-56	1.8248e-54	utp15	PREDICTED: U3 small nucleolar RNA-associated protein 15 homolog [Bactrocera dorsalis]	Genetic Information Processing	Translation	ko03008//Ribosome biogenesis in eukaryotes	K14549	-	-	GO:0016072//rRNA metabolic process
MSTRG.12597	3	1	4	5	3	975	1797	618	3031	2957	0.3	0.12	0.4	0.57	0.35	124.17	170	87.75	380.93	325.46	0.348	217.662	9.28879	9.21299e-56	2.13563e-54	--	-	-	-	-	-	-	-	-
LOC105223322	743	644	743	611	666	256	331	213	224	284	22.25	22.82	22.23	20.93	23.33	9.72	9.34	9.02	8.39	9.32	22.312	9.158	-1.28472	1.81371e-55	4.18455e-54	PRMT3	PREDICTED: protein arginine N-methyltransferase 1 [Bactrocera dorsalis]	-	-	-	-	-	GO:0008168//methyltransferase activity	GO:0008213//protein alkylation
LOC105222794	1482	1445	1711	1362	1383	2671	3517	2534	2705	2874	21.71	25.05	25.05	22.83	23.71	49.62	48.54	52.49	49.59	46.14	23.67	49.276	1.05783	1.81657e-55	4.18455e-54	-	-	-	-	-	-	-	-	-
LOC105224306	6	2	5	1	6	843	1541	704	2200	3195	0.35	0.14	0.29	0.07	0.41	62.22	84.52	57.96	160.27	203.85	0.252	113.764	8.8184	1.92282e-55	4.42009e-54	--	PREDICTED: venom allergen 3-like [Bactrocera dorsalis]	-	-	-	-	-	-	-
LOC105233964	585	559	682	644	551	1216	1553	1002	1073	1277	20.63	23.3	24.01	26.07	22.71	54.32	51.55	49.97	47.41	49.32	23.344	50.514	1.11363	2.04402e-55	4.68893e-54	colt	PREDICTED: congested-like trachea protein isoform X2 [Bactrocera dorsalis]	Organismal Systems	Environmental adaptation	ko04714//Thermogenesis	K15109	GO:0019866//organelle inner membrane;GO:0031224//intrinsic component of membrane	GO:0015297//antiporter activity	GO:0006812//cation transport;GO:0006897//endocytosis;GO:0015697//quaternary ammonium group transport;GO:0042045//epithelial fluid transport;GO:1902582//single-organism intracellular transport
LOC105230774	468	414	527	423	368	909	1152	831	999	960	14.45	15.13	16.26	14.94	13.3	35.59	33.51	36.28	38.6	32.49	14.816	35.294	1.25227	2.47583e-55	5.66771e-54	Coq6	PREDICTED: ubiquinone biosynthesis monooxygenase COQ6, mitochondrial [Bactrocera dorsalis]	Metabolism;Metabolism	Global and overview maps;Metabolism of cofactors and vitamins	ko01100//Metabolic pathways;ko00130//Ubiquinone and other terpenoid-quinone biosynthesis	K06126;K06126	-	GO:0000166//nucleotide binding;GO:0004497//monooxygenase activity	GO:0006743//ubiquinone metabolic process
LOC105227860	232	232	317	240	193	18	18	27	13	17	8.83	10.45	12.06	10.45	8.6	0.87	0.65	1.45	0.62	0.71	10.078	0.86	-3.55073	5.43027e-55	1.23287e-53	--	GM22403 [Drosophila sechellia]	-	-	-	-	-	-	-
LOC105230706	1326	795	1047	894	869	129	314	107	156	180	25.45	18.06	20.09	19.63	19.52	3.14	5.68	2.9	3.75	3.79	20.55	3.852	-2.41546	5.56258e-55	1.26032e-53	NOP2	PREDICTED: 25S rRNA (cytosine-C(5))-methyltransferase nop2 [Bactrocera dorsalis]	-	-	-	-	-	GO:0008168//methyltransferase activity	GO:0016072//rRNA metabolic process
LOC105233528	1748	1456	1779	1427	1425	562	850	483	458	638	32.03	31.19	32.35	29.61	30.97	12.87	14.64	12.29	10.38	12.3	31.23	12.496	-1.32147	8.34227e-55	1.88624e-53	Rab11fip2	PREDICTED: rab11 family-interacting protein 1 [Bactrocera dorsalis]	Cellular Processes	Transport and catabolism	ko04144//Endocytosis	K12484	-	-	-
LOC105224224	981	774	893	806	827	1585	1876	1423	1721	1749	87.33	81.54	79.46	82.09	86.15	178.94	157.32	179.12	191.74	170.65	83.314	175.554	1.07528	8.72492e-55	1.96873e-53	HIGD2A	PREDICTED: HIG1 domain family member 2A, mitochondrial [Bactrocera dorsalis]	-	-	-	-	GO:0031224//intrinsic component of membrane	-	-
LOC105229250	245	175	236	199	188	554	800	580	510	555	6.08	5.03	5.82	5.56	5.38	17.39	18.79	20.16	15.68	14.86	5.574	17.376	1.64031	2.55196e-54	5.72923e-53	--	hypothetical protein [Bactrocera dorsalis]	-	-	-	-	-	-	-
LOC105228691	16867	13285	16421	14756	13278	26056	37993	29952	26772	34073	733.13	683.12	713.09	733.45	674.49	1438.08	1558.02	1843.22	1457.91	1625.37	707.456	1584.52	1.16333	2.55463e-54	5.72923e-53	GstS1	PREDICTED: glutathione S-transferase S1 [Bactrocera dorsalis]	Metabolism;Metabolism;Metabolism;Metabolism;Human Diseases;Metabolism	Global and overview maps;Xenobiotics biodegradation and metabolism;Metabolism of other amino acids;Xenobiotics biodegradation and metabolism;Cancers;Lipid metabolism	ko01100//Metabolic pathways;ko00980//Metabolism of xenobiotics by cytochrome P450;ko00480//Glutathione metabolism;ko00982//Drug metabolism - cytochrome P450;ko05204//Chemical carcinogenesis;ko00590//Arachidonic acid metabolism	K04097;K04097;K04097;K04097;K04097;K04097	GO:0044424//intracellular part	GO:0004601//peroxidase activity;GO:0016765//transferase activity, transferring alkyl or aryl (other than methyl) groups	GO:0006790//sulfur compound metabolic process;GO:0006950//response to stress
LOC105227610	1231	1217	1350	1215	1084	2438	3701	1893	2077	2869	27.35	32	29.98	30.88	28.18	68.7	77.46	59.47	57.75	69.86	29.678	66.648	1.16717	2.94293e-54	6.58668e-53	Pisd	PREDICTED: phosphatidylserine decarboxylase proenzyme, mitochondrial [Bactrocera dorsalis]	Metabolism;Metabolism	Global and overview maps;Lipid metabolism	ko01100//Metabolic pathways;ko00564//Glycerophospholipid metabolism	K01613;K01613	-	-	GO:0006644//phospholipid metabolic process
LOC105224918	1373	1157	1224	1228	884	3065	3617	2732	2739	2816	35.16	35.21	31.35	36.03	26.58	99.7	87.28	98.87	87.9	79.01	32.866	90.552	1.46215	3.27903e-54	7.32406e-53	fdl	PREDICTED: chitooligosaccharidolytic beta-N-acetylglucosaminidase [Bactrocera dorsalis]	Metabolism;Cellular Processes;Metabolism;Metabolism;Metabolism;Metabolism;Metabolism	Global and overview maps;Transport and catabolism;Carbohydrate metabolism;Glycan biosynthesis and metabolism;Glycan biosynthesis and metabolism;Glycan biosynthesis and metabolism;Glycan biosynthesis and metabolism	ko01100//Metabolic pathways;ko04142//Lysosome;ko00520//Amino sugar and nucleotide sugar metabolism;ko00511//Other glycan degradation;ko00531//Glycosaminoglycan degradation;ko00604//Glycosphingolipid biosynthesis - ganglio series;ko00603//Glycosphingolipid biosynthesis - globo and isoglobo series	K12373;K12373;K12373;K12373;K12373;K12373;K12373	GO:0016020//membrane;GO:0044421//extracellular region part	GO:0004563//beta-N-acetylhexosaminidase activity	GO:0000003//reproduction;GO:0044126//regulation of growth of symbiont in host;GO:0044238//primary metabolic process
LOC105233439	507	347	473	461	405	115	136	105	90	121	15.34	12.42	14.3	15.95	14.33	4.41	3.88	4.49	3.41	4.01	14.468	4.04	-1.84044	4.4209e-54	9.85459e-53	RRP9	PREDICTED: LOW QUALITY PROTEIN: U3 small nucleolar RNA-interacting protein 2 [Bactrocera dorsalis]	-	-	-	-	-	-	-
LOC105229852	9567	8483	10435	7636	8140	3802	4664	3012	3252	3969	214.17	224.72	233.48	195.57	213.22	107.94	98.36	95.34	91.11	97.38	216.232	98.026	-1.14134	4.78538e-54	1.06455e-52	SLC3A2	4F2 cell-surface antigen heavy chain [Bactrocera dorsalis]	Environmental Information Processing;Organismal Systems;Cellular Processes	Signal transduction;Digestive system;Cell growth and death	ko04150//mTOR signaling pathway;ko04974//Protein digestion and absorption;ko04216//Ferroptosis	K06519;K06519;K06519	-	GO:0043167//ion binding	GO:0044238//primary metabolic process
LOC105223646	4191	2943	3775	2840	3117	5985	9006	5287	5800	6463	40.95	33.93	36.8	31.81	35.54	73.94	82	72.4	70.23	68.24	35.806	73.362	1.03483	5.86526e-54	1.30216e-52	AAEL008004	PREDICTED: elongation of very long chain fatty acids protein AAEL008004 isoform X1 [Bactrocera dorsalis]	-	-	-	-	-	-	-
LOC105222593	1096	875	981	1034	903	313	438	326	299	403	19.57	18.48	17.5	21.12	18.86	7.09	7.37	8.23	6.68	7.89	19.106	7.452	-1.35833	6.17617e-54	1.36843e-52	PWP2	PREDICTED: periodic tryptophan protein 2 homolog [Bactrocera dorsalis]	Genetic Information Processing	Translation	ko03008//Ribosome biogenesis in eukaryotes	K14558	-	-	-
LOC105224447	782	560	645	519	625	74	162	76	73	151	12.72	10.78	10.49	9.66	11.9	1.53	2.48	1.75	1.49	2.69	11.11	1.988	-2.48247	6.25276e-54	1.3816e-52	Cebpz	PREDICTED: CCAAT/enhancer-binding protein zeta [Bactrocera dorsalis]	-	-	-	-	-	-	-
LOC105233954	575	471	575	497	433	856	1206	780	995	1210	16.99	16.47	16.98	16.8	14.97	32.07	33.56	32.58	36.79	39.18	16.442	34.836	1.08319	6.26064e-54	1.3816e-52	Uap1	PREDICTED: UDP-N-acetylhexosamine pyrophosphorylase [Bactrocera dorsalis]	Metabolism;Metabolism	Global and overview maps;Carbohydrate metabolism	ko01100//Metabolic pathways;ko00520//Amino sugar and nucleotide sugar metabolism	K00972;K00972	-	GO:0070569//uridylyltransferase activity	GO:0006031//chitin biosynthetic process;GO:0008038//neuron recognition;GO:0016331//morphogenesis of embryonic epithelium;GO:0035150//regulation of tube size;GO:0040003//chitin-based cuticle development;GO:0043062//extracellular structure organization;GO:0060541//respiratory system development;GO:0072175//epithelial tube formation
LOC105230015	235	166	198	210	185	11	31	6	20	25	8.41	7.03	7.08	8.6	7.75	0.5	1.05	0.3	0.9	0.98	7.774	0.746	-3.38141	8.00241e-54	1.76245e-52	Lyar	PREDICTED: cell growth-regulating nucleolar protein [Bactrocera cucurbitae]	-	-	-	-	-	-	-
LOC105228521	719	568	696	599	578	1314	1467	1121	1197	1293	16.34	15.27	15.81	15.56	15.4	37.85	31.4	36.08	34.02	32.15	15.676	34.3	1.12965	1.2649e-53	2.77474e-52	spartin	PREDICTED: protein spartin isoform X1 [Bactrocera dorsalis]	Cellular Processes	Transport and catabolism	ko04144//Endocytosis	K19366	-	-	-
LOC105228804	681	476	572	542	588	140	231	148	163	203	18.31	15.15	15.37	16.67	18.5	4.77	5.85	5.63	5.49	5.98	16.8	5.544	-1.59946	1.70228e-53	3.71204e-52	RPUSD2	PREDICTED: RNA pseudouridylate synthase domain-containing protein 2 [Bactrocera dorsalis]	-	-	-	-	-	GO:0003676//nucleic acid binding;GO:0016866//intramolecular transferase activity	GO:0016070//RNA metabolic process
LOC105231348	1172	987	1191	999	974	260	505	206	294	385	35.19	35.07	35.74	34.32	34.22	9.9	14.28	8.75	11.05	12.67	34.908	11.33	-1.62341	2.28494e-53	4.97278e-52	SMS	PREDICTED: spermine synthase isoform X2 [Bactrocera dorsalis]	Metabolism;Metabolism;Metabolism;Metabolism;Metabolism	Global and overview maps;Metabolism of other amino acids;Amino acid metabolism;Amino acid metabolism;Metabolism of other amino acids	ko01100//Metabolic pathways;ko00480//Glutathione metabolism;ko00330//Arginine and proline metabolism;ko00270//Cysteine and methionine metabolism;ko00410//beta-Alanine metabolism	K00802;K00802;K00802;K00802;K00802	-	GO:0016765//transferase activity, transferring alkyl or aryl (other than methyl) groups	GO:0006596//polyamine biosynthetic process
LOC105227443	1639	1468	1520	1356	1383	482	804	478	615	679	56.42	59.8	52.3	53.41	55.71	21.04	26.07	23.27	26.5	25.62	55.528	24.5	-1.18043	2.78293e-53	6.04466e-52	--	CG8010 [Drosophila melanogaster]	-	-	-	-	-	-	-
LOC105229544	1779	1665	1916	1454	1557	480	851	519	519	615	21.47	23.93	23.17	20.07	21.97	7.39	9.76	8.97	7.77	8.21	22.122	8.42	-1.39359	3.74884e-53	8.11073e-52	--	PREDICTED: probable serine/threonine-protein kinase nek3 [Bactrocera latifrons]	-	-	-	-	-	-	-
LOC105233356	4754	4111	5138	4076	4042	1015	2185	929	1118	1340	103.77	106.19	112.09	101.79	103.23	28.1	44.93	28.67	30.54	32.06	105.414	32.86	-1.68166	4.21425e-53	9.09981e-52	maf1	PREDICTED: repressor of RNA polymerase III transcription MAF1 homolog [Bactrocera cucurbitae]	-	-	-	-	-	-	GO:0006359//regulation of transcription from RNA polymerase III promoter
LOC105228496	507	356	412	368	313	78	139	74	87	108	12.35	10.26	10.03	10.26	8.92	2.41	3.19	2.55	2.65	2.88	10.364	2.736	-1.92144	4.85844e-53	1.04499e-51	MPHOSPH10	PREDICTED: U3 small nucleolar ribonucleoprotein protein MPP10 [Bactrocera dorsalis]	Genetic Information Processing	Translation	ko03008//Ribosome biogenesis in eukaryotes	K14559	GO:0030529//intracellular ribonucleoprotein complex;GO:0044423//virion part	-	GO:0016072//rRNA metabolic process;GO:0033554//cellular response to stress
LOC105231714	2123	1904	2006	1925	1678	3994	4409	3014	3679	3724	82.27	87.32	77.7	85.35	76.09	196.29	160.96	165.15	178.43	158.17	81.746	171.8	1.07151	4.88741e-53	1.04918e-51	AnxB10	PREDICTED: annexin B10 [Bactrocera dorsalis]	-	-	-	-	-	-	-
LOC105224307	11	0	4	6	7	1865	3148	1473	4699	7144	0.63	0	0.23	0.39	0.47	135.34	169.66	119.15	336.49	447.97	0.344	241.722	9.45672	5.41888e-53	1.16101e-51	--	PREDICTED: venom allergen 3-like [Bactrocera dorsalis]	-	-	-	-	-	-	-
LOC105232007	557	532	550	499	534	166	235	130	159	212	27.25	30.8	26.89	27.93	30.57	10.3	10.83	8.99	9.73	11.37	28.688	10.244	-1.48567	6.55344e-53	1.40137e-51	CG3527	PREDICTED: ribosomal RNA small subunit methyltransferase NEP1 [Bactrocera dorsalis]	Genetic Information Processing	Translation	ko03008//Ribosome biogenesis in eukaryotes	K14568	-	GO:0003824//catalytic activity	GO:0008152//metabolic process
LOC105230667	732	612	713	617	601	189	345	202	217	235	33.62	33.7	33.19	32.2	32.14	11.43	15.62	13.36	12.72	11.75	32.97	12.976	-1.34531	6.79202e-53	1.44958e-51	GI19452	PREDICTED: cytoplasmic tRNA 2-thiolation protein 1 isoform X1 [Bactrocera dorsalis]	Genetic Information Processing	Folding, sorting and degradation	ko04122//Sulfur relay system	K14168	-	-	-
LOC105228506	50	30	47	63	50	254	270	190	260	275	0.81	0.57	0.76	1.16	0.94	5.19	4.1	4.33	5.24	4.86	0.848	4.744	2.48397	8.93078e-53	1.90236e-51	-	-	-	-	-	-	-	-	-
LOC105224204	281	234	221	221	260	715	761	635	637	759	5.21	5.13	4.09	4.69	5.64	16.81	13.29	16.64	14.78	15.42	4.952	15.388	1.63572	9.48015e-53	2.01549e-51	SDR16C6	PREDICTED: estradiol 17-beta-dehydrogenase 11 [Bactrocera dorsalis]	Metabolism	Metabolism of cofactors and vitamins	ko00830//Retinol metabolism	K15734	-	GO:0003824//catalytic activity	GO:0044710//single-organism metabolic process
LOC105232855	2	0	1	2	3	414	577	354	830	1294	0.03	0	0.02	0.06	0.09	8.17	8.63	7.81	15.49	22.05	0.04	12.43	8.27961	1.00599e-52	2.13463e-51	pax6a	PREDICTED: paired box protein Pax-6 isoform X1 [Bactrocera dorsalis]	-	-	-	-	-	-	-
LOC105223762	3581	2868	3286	3770	2902	6483	8076	5901	6304	6854	124.32	117.82	114.02	149.74	117.88	285.43	264.12	289.66	273.89	260.79	124.756	274.778	1.13916	1.06625e-52	2.25816e-51	PPAF2	PREDICTED: serine protease 27 [Bactrocera dorsalis]	-	-	-	-	-	GO:0004175//endopeptidase activity	GO:0019538//protein metabolic process
LOC105223224	139	115	128	130	110	276	408	243	292	378	4.04	3.95	3.72	4.32	3.74	10.17	11.16	9.98	10.61	12.03	3.954	10.79	1.44831	1.35401e-52	2.86209e-51	ea	PREDICTED: serine protease snake isoform X2 [Bactrocera dorsalis]	-	-	-	-	-	-	-
MSTRG.10512	659	530	452	483	460	115	162	104	131	148	47.75	45.44	32.73	40.04	39	10.57	11.06	10.65	11.88	11.75	40.992	11.182	-1.87416	1.70841e-52	3.60432e-51	--	-	-	-	-	-	-	-	-
LOC105229088	1359	1236	1396	1373	1110	2346	2878	2142	2418	3071	46.22	49.76	47.49	53.51	44.21	101.27	92.44	103.18	103.15	114.96	48.238	103	1.0944	1.94327e-52	4.09199e-51	ndfip1l	PREDICTED: NEDD4 family-interacting protein 1 [Bactrocera dorsalis]	-	-	-	-	-	-	-
LOC105232280	180	106	58	130	86	976	1181	550	1013	1198	4.23	2.92	1.35	3.47	2.35	28.93	25.94	18.19	29.64	30.65	2.864	26.67	3.21911	2.11924e-52	4.45403e-51	--	PREDICTED: proline-rich protein 4 [Bactrocera dorsalis]	-	-	-	-	-	-	-
LOC105224072	767	714	703	621	577	1534	2183	1455	1938	2660	26.61	29.31	24.38	24.65	23.42	67.49	71.35	71.38	84.15	101.15	25.674	79.104	1.62344	2.34345e-52	4.91589e-51	Catsup	PREDICTED: protein catecholamines up [Bactrocera dorsalis]	-	-	-	-	-	-	GO:0044765//single-organism transport
LOC105231755	47	22	38	27	31	304	265	164	207	250	1.58	0.88	1.28	1.04	1.22	12.97	8.4	7.8	8.72	9.22	1.2	9.422	2.973	2.52558e-52	5.28791e-51	P4HA2	PREDICTED: prolyl 4-hydroxylase subunit alpha-2 isoform X1 [Bactrocera dorsalis]	Metabolism;Metabolism	Global and overview maps;Amino acid metabolism	ko01100//Metabolic pathways;ko00330//Arginine and proline metabolism	K00472;K00472	-	GO:0016705//oxidoreductase activity, acting on paired donors, with incorporation or reduction of molecular oxygen;GO:0043167//ion binding	GO:0008152//metabolic process
LOC105227970	202	217	156	223	179	4	12	5	8	3	4.39	5.58	3.39	5.54	4.55	0.11	0.25	0.15	0.22	0.07	4.69	0.16	-4.87344	2.80074e-52	5.85291e-51	PNP	PREDICTED: purine nucleoside phosphorylase [Bactrocera dorsalis]	Metabolism;Metabolism;Metabolism;Metabolism	Global and overview maps;Nucleotide metabolism;Nucleotide metabolism;Metabolism of cofactors and vitamins	ko01100//Metabolic pathways;ko00230//Purine metabolism;ko00240//Pyrimidine metabolism;ko00760//Nicotinate and nicotinamide metabolism	K03783;K03783;K03783;K03783	-	-	-
LOC105227846	23	12	14	15	22	133	321	148	181	172	0.33	0.2	0.2	0.25	0.37	2.43	4.36	3.01	3.27	2.71	0.27	3.156	3.54707	3.09379e-52	6.4531e-51	PLPP1	Peripheral plasma membrane protein CASK [Ceratitis capitata]	Metabolism;Environmental Information Processing;Metabolism;Human Diseases;Organismal Systems;Metabolism;Metabolism;Organismal Systems;Metabolism	Global and overview maps;Signal transduction;Lipid metabolism;Cancers;Immune system;Lipid metabolism;Lipid metabolism;Digestive system;Lipid metabolism	ko01100//Metabolic pathways;ko04072//Phospholipase D signaling pathway;ko00564//Glycerophospholipid metabolism;ko05231//Choline metabolism in cancer;ko04666//Fc gamma R-mediated phagocytosis;ko00561//Glycerolipid metabolism;ko00600//Sphingolipid metabolism;ko04975//Fat digestion and absorption;ko00565//Ether lipid metabolism	K01080;K01080;K01080;K01080;K01080;K01080;K01080;K01080;K01080	-	-	-
LOC105232010	753	922	888	601	544	2812	3293	2073	2207	2920	23.04	33.38	27.15	21.04	19.47	109.1	94.9	89.67	84.5	97.91	24.816	95.216	1.93993	3.75159e-52	7.8104e-51	GNBP3	PREDICTED: gram-negative bacteria-binding protein 3-like [Bactrocera dorsalis]	Organismal Systems	Immune system	ko04624//Toll and Imd signaling pathway	K20692	-	-	-
LOC105229294	1705	1416	1799	1642	1534	681	899	613	609	798	25.04	24.44	26.01	27.18	26.08	12.56	12.3	12.56	11.04	12.9	25.75	12.272	-1.0692	4.95797e-52	1.03025e-50	CG3714	PREDICTED: nicotinate phosphoribosyltransferase isoform X1 [Bactrocera dorsalis]	Metabolism;Metabolism	Global and overview maps;Metabolism of cofactors and vitamins	ko01100//Metabolic pathways;ko00760//Nicotinate and nicotinamide metabolism	K00763;K00763	-	GO:0016763//transferase activity, transferring pentosyl groups	GO:0019357//nicotinate nucleotide biosynthetic process;GO:0019359//nicotinamide nucleotide biosynthetic process
LOC105226355	10	10	7	8	5	134	144	135	118	147	0.45	0.54	0.32	0.41	0.26	7.69	6.14	8.63	6.68	7.29	0.396	7.286	4.20155	4.99871e-52	1.03676e-50	CFAP36	PREDICTED: cilia- and flagella-associated protein 36 [Bactrocera dorsalis]	-	-	-	-	-	-	-
LOC105227047	1048	841	982	853	890	350	562	331	362	412	77.62	73.71	72.69	72.28	77.13	32.87	39.21	34.66	33.55	33.44	74.686	34.746	-1.10399	5.08016e-52	1.05168e-50	tsr2	PREDICTED: pre-rRNA-processing protein TSR2 homolog [Bactrocera dorsalis]	-	-	-	-	-	-	-
LOC105223338	1160	883	935	907	820	131	326	105	139	187	15.29	13.77	12.32	13.68	12.65	2.19	4.05	1.96	2.29	2.7	13.542	2.638	-2.35992	5.36443e-52	1.10845e-50	Mat89Ba	PREDICTED: nucleolar protein 6 [Bactrocera dorsalis]	Genetic Information Processing	Translation	ko03008//Ribosome biogenesis in eukaryotes	K14544	-	-	-
LOC115066575	407	348	380	283	351	64	116	62	78	100	7.5	7.59	7	5.97	7.57	1.5	2.01	1.62	1.8	2.02	7.126	1.79	-1.99313	8.10735e-52	1.67209e-50	--	beat-Ib, partial [Drosophila busckii]	-	-	-	-	-	-	-
LOC105232883	623	1227	1123	552	624	51	73	61	49	69	16	37.27	28.83	16.21	18.74	1.66	1.76	2.21	1.57	1.94	23.41	1.828	-3.67879	1.16015e-51	2.38381e-50	--	PREDICTED: leucine-rich repeat-containing protein 15 [Bactrocera dorsalis]	-	-	-	-	-	-	-
LOC105229786	60	44	52	77	42	298	346	219	216	343	1.19	1.03	1.03	1.75	0.98	7.5	6.47	6.15	5.36	7.46	1.196	6.588	2.46162	1.20984e-51	2.48129e-50	SLC10A3	PREDICTED: ileal sodium/bile acid cotransporter [Bactrocera dorsalis]	-	-	-	-	-	-	-
LOC105225942	409	311	346	356	309	89	132	76	104	97	10.34	9.31	8.74	10.3	9.14	2.85	3.14	2.72	3.29	2.69	9.566	2.938	-1.70308	1.44918e-51	2.96665e-50	TRMT2A	PREDICTED: tRNA (uracil-5-)-methyltransferase homolog A [Bactrocera dorsalis]	-	-	-	-	-	GO:0008168//methyltransferase activity;GO:0097159//organic cyclic compound binding	GO:0009451//RNA modification;GO:0010467//gene expression
LOC105229113	4306	3313	3732	3391	3012	7110	9838	6664	9274	11810	171.48	156.13	148.55	154.5	140.35	359.09	369.08	375.24	462.22	515.47	154.202	416.22	1.43252	1.84589e-51	3.77178e-50	cyn-5	PREDICTED: peptidyl-prolyl cis-trans isomerase 5 [Bactrocera dorsalis]	-	-	-	-	-	GO:0016859//cis-trans isomerase activity	GO:0044267//cellular protein metabolic process
LOC105233939	229	134	146	147	171	728	859	583	701	539	12.67	8.77	8.07	9.3	11.07	51.07	44.76	45.6	48.53	32.68	9.976	44.528	2.15818	2.42756e-51	4.95115e-50	-	-	-	-	-	-	-	-	-
LOC105229583	612	708	451	455	576	2626	4292	2068	1855	3543	13.78	18.73	10.31	11.92	15.15	76.22	91.72	67.21	53.47	88.36	13.978	75.396	2.43133	3.77572e-51	7.65832e-50	SLC26A11	PREDICTED: sodium-independent sulfate anion transporter isoform X1 [Bactrocera dorsalis]	-	-	-	-	GO:0031224//intrinsic component of membrane	GO:0015103//inorganic anion transmembrane transporter activity	GO:0008272//sulfate transport;GO:0044763//single-organism cellular process
LOC105230993	640	501	547	524	512	156	244	151	189	234	11.85	10.97	10.12	11.1	11.09	3.66	4.25	3.95	4.38	4.75	11.026	4.198	-1.39314	3.88229e-51	7.86004e-50	CG8611	PREDICTED: probable ATP-dependent RNA helicase CG8611 [Bactrocera dorsalis]	-	-	-	-	-	GO:0003676//nucleic acid binding;GO:0016787//hydrolase activity	-
LOC105225994	820	626	634	661	655	1180	1881	1047	1363	1342	27.77	26.5	21.01	28.03	25.72	74.53	86.85	74.47	84.77	73.28	25.806	78.78	1.61012	3.93701e-51	7.95622e-50	Gst4	Glutathione S-transferase 1 [Ceratitis capitata]	Human Diseases;Human Diseases;Metabolism;Organismal Systems;Human Diseases;Human Diseases;Metabolism;Metabolism;Metabolism;Human Diseases;Human Diseases	Cancers;Cancers;Xenobiotics biodegradation and metabolism;Aging;Cardiovascular diseases;Cancers;Xenobiotics biodegradation and metabolism;Metabolism of other amino acids;Xenobiotics biodegradation and metabolism;Cancers;Drug resistance	ko05200//Pathways in cancer;ko05225//Hepatocellular carcinoma;ko00983//Drug metabolism - other enzymes;ko04212//Longevity regulating pathway - worm;ko05418//Fluid shear stress and atherosclerosis;ko05215//Prostate cancer;ko00980//Metabolism of xenobiotics by cytochrome P450;ko00480//Glutathione metabolism;ko00982//Drug metabolism - cytochrome P450;ko05204//Chemical carcinogenesis;ko01524//Platinu…	K00799;K00799;K00799;K00799;K00799;K00799;K00799;K00799;K00799;K00799;K00799	-	GO:0003824//catalytic activity	-
LOC105228102	2448	1837	2213	1897	2024	725	1246	631	843	995	38.06	33.75	34.12	32.84	36.09	15.05	18.22	13.93	16.55	17.05	34.972	16.16	-1.11377	7.87616e-51	1.58587e-49	Ars2	PREDICTED: serrate RNA effector molecule homolog isoform X1 [Bactrocera dorsalis]	-	-	-	-	-	-	-
LOC105230662	596	437	493	501	440	119	217	95	110	152	16.37	14.2	13.53	15.74	14.14	4.14	5.61	3.69	3.78	4.57	14.796	4.358	-1.76347	9.03e-51	1.81158e-49	Dbp45A	PREDICTED: probable ATP-dependent RNA helicase Dbp45A [Bactrocera dorsalis]	-	-	-	-	-	GO:0017111//nucleoside-triphosphatase activity;GO:0032550//purine ribonucleoside binding	-
LOC105230559	2108	1754	2053	1653	1657	670	1126	539	713	859	99.83	98.3	97.17	89.56	91.82	40.24	50.23	36.09	42.26	44.59	95.336	42.682	-1.15939	9.66821e-51	1.9361e-49	eIF3j	PREDICTED: eukaryotic translation initiation factor 3 subunit J [Bactrocera dorsalis]	Genetic Information Processing	Translation	ko03013//RNA transport	K03245	GO:0043234//protein complex;GO:0070993//translation preinitiation complex	GO:0008135//translation factor activity, RNA binding	GO:0006417//regulation of translation;GO:0030154//cell differentiation
LOC105222387	1471	1382	1317	1461	1006	3257	3617	2537	3082	3446	51.2	56.92	45.82	58.18	40.97	143.77	118.6	124.86	134.26	131.46	50.618	130.59	1.36732	9.78595e-51	1.95613e-49	--	AGAP010196-PA-like protein [Anopheles sinensis]	-	-	-	-	-	-	-
LOC105222326	1146	868	900	1012	913	345	439	299	357	379	22.85	20.48	17.93	23.08	21.3	8.72	8.24	8.43	8.91	8.28	21.128	8.516	-1.31091	1.21102e-50	2.41636e-49	TBL3	PREDICTED: transducin beta-like protein 3 [Bactrocera dorsalis]	Genetic Information Processing	Translation	ko03008//Ribosome biogenesis in eukaryotes	K14555	-	-	GO:0030154//cell differentiation;GO:0033554//cellular response to stress
LOC105232627	168	115	106	179	115	669	678	413	570	646	5.21	4.11	3.18	6.19	4.09	25.62	19.21	17.42	22.24	21.87	4.556	21.272	2.22312	1.36686e-50	2.72237e-49	ACPP	PREDICTED: venom acid phosphatase Acph-1 [Bactrocera dorsalis]	-	-	-	-	-	-	GO:0006796//phosphate-containing compound metabolic process
LOC105228045	425	412	362	424	306	852	1099	754	835	987	10.23	11.73	8.71	11.67	8.62	26	24.91	25.65	25.15	26.03	10.192	25.548	1.32577	1.6347e-50	3.24997e-49	Mal-A3	PREDICTED: maltase A3 [Bactrocera dorsalis]	Metabolism;Metabolism;Metabolism	Global and overview maps;Carbohydrate metabolism;Carbohydrate metabolism	ko01100//Metabolic pathways;ko00500//Starch and sucrose metabolism;ko00052//Galactose metabolism	K01187;K01187;K01187	-	-	-
LOC105226436	1031	956	910	1031	878	2505	3113	2032	3252	3965	76.91	84.09	67.68	87.7	76.43	236.97	219.04	214.43	303.24	323.41	78.562	259.418	1.72338	1.662e-50	3.29829e-49	Serp2	PREDICTED: stress-associated endoplasmic reticulum protein 2 [Ceratitis capitata]	-	-	-	-	GO:0043231//intracellular membrane-bounded organelle	-	GO:0036211//protein modification process
LOC105232034	1054	758	1103	1045	947	2488	4217	2530	2889	2319	26.87	22.86	28.1	30.47	28.24	80.43	101.26	91.18	92.16	64.79	27.308	85.964	1.65441	2.74095e-50	5.42e-49	--	PREDICTED: acidic phospholipase A2 PA4 [Drosophila arizonae]	Metabolism;Organismal Systems;Environmental Information Processing;Organismal Systems;Metabolism;Organismal Systems;Metabolism;Metabolism;Metabolism;Metabolism	Global and overview maps;Digestive system;Signal transduction;Circulatory system;Lipid metabolism;Digestive system;Lipid metabolism;Lipid metabolism;Lipid metabolism;Lipid metabolism	ko01100//Metabolic pathways;ko04972//Pancreatic secretion;ko04014//Ras signaling pathway;ko04270//Vascular smooth muscle contraction;ko00564//Glycerophospholipid metabolism;ko04975//Fat digestion and absorption;ko00565//Ether lipid metabolism;ko00590//Arachidonic acid metabolism;ko00592//alpha-Linolenic acid metabolism;ko00591//Linoleic acid metabolism	K01047;K01047;K01047;K01047;K01047;K01047;K01047;K01047;K01047;K01047	-	-	GO:0006629//lipid metabolic process
LOC105224336	151	120	121	129	115	318	458	286	329	315	10.53	9.9	8.43	10.29	9.38	28.11	30.07	28.19	28.7	24.07	9.706	27.828	1.51959	2.7571e-50	5.44218e-49	D2HGDH	PREDICTED: D-2-hydroxyglutarate dehydrogenase, mitochondrial [Bactrocera dorsalis]	-	-	-	-	-	-	-
LOC105224685	42	53	55	46	39	166	248	142	176	200	1.28	1.91	1.68	1.61	1.39	6.42	7.13	6.12	6.72	6.69	1.574	6.616	2.07152	2.79013e-50	5.49755e-49	-	-	-	-	-	-	-	-	-
LOC105232091	1340	1212	1521	1144	1337	437	679	370	467	461	17.97	18.63	20.19	17.54	20.9	7.14	8.58	6.9	8	6.54	19.046	7.432	-1.35767	2.82935e-50	5.5649e-49	Axn	PREDICTED: axin isoform X1 [Bactrocera dorsalis]	Human Diseases;Human Diseases;Human Diseases;Environmental Information Processing;Environmental Information Processing;Human Diseases;Cellular Processes;Human Diseases;Human Diseases;Human Diseases;Human Diseases;Human Diseases	Cancers;Infectious diseases;Cancers;Signal transduction;Signal transduction;Endocrine and metabolic diseases;Cellular community - eukaryotes;Cancers;Cancers;Cancers;Cancers;Cancers	ko05200//Pathways in cancer;ko05165//Human papillomavirus infection;ko05225//Hepatocellular carcinoma;ko04310//Wnt signaling pathway;ko04390//Hippo signaling pathway;ko04934//Cushing syndrome;ko04550//Signaling pathways regulating pluripotency of stem cells;ko05226//Gastric cancer;ko05224//Breast cancer;ko05210//Colorectal cancer;ko05213//Endometrial cancer;ko05217//Basal cell carcinoma	K02157;K02157;K02157;K02157;K02157;K02157;K02157;K02157;K02157;K02157;K02157;K02157	-	-	-
LOC105227778	1154	1058	1268	1172	1032	466	669	360	457	491	26.24	28.27	28.56	30.2	27.59	13.41	14.3	11.71	13.25	12.12	28.172	12.958	-1.12042	2.97018e-50	5.83149e-49	Dnajb2	PREDICTED: dnaJ homolog subfamily B member 2 isoform X1 [Bactrocera dorsalis]	-	-	-	-	-	-	-
LOC105233409	1241	1166	1432	1422	1374	294	540	323	304	327	29.13	32.38	33.59	38.18	37.73	8.75	11.94	10.72	8.93	8.41	34.202	9.75	-1.81061	3.60202e-50	7.04692e-49	-	-	-	-	-	-	-	-	-
LOC105234205	1887	1453	1873	1687	1643	3543	4658	3148	4816	5494	97.32	88.67	96.54	99.53	99.14	231.72	226.29	229.55	310.83	310.53	96.24	261.784	1.44367	5.4856e-50	1.06752e-48	KdelR	PREDICTED: ER lumen protein-retaining receptor [Bactrocera dorsalis]	Human Diseases	Infectious diseases	ko05110//Vibrio cholerae infection	K10949	GO:0031224//intrinsic component of membrane;GO:0043231//intracellular membrane-bounded organelle	GO:0046923//ER retention sequence binding	GO:0035437//maintenance of protein localization in endoplasmic reticulum;GO:0048193//Golgi vesicle transport
LOC105228190	1368	1219	1185	1295	1173	357	646	286	392	465	38.17	40.26	33.06	41.34	38.31	12.63	16.99	11.28	13.69	14.22	38.228	13.762	-1.47394	6.01374e-50	1.16823e-48	elp4	GH22667 [Drosophila grimshawi]	-	-	-	-	GO:0043234//protein complex	-	-
LOC105233149	6536	5678	6272	6773	5492	12675	17549	9234	10278	12675	205.02	210.76	196.63	243.06	201.57	504.21	518.55	409.54	403.48	435.75	211.408	454.306	1.10363	7.52606e-50	1.45945e-48	Idgf4	PREDICTED: chitinase-like protein Idgf4 [Bactrocera dorsalis]	-	-	-	-	-	GO:0004553//hydrolase activity, hydrolyzing O-glycosyl compounds	GO:0006026//aminoglycan catabolic process;GO:0044238//primary metabolic process
LOC105226942	545	558	610	546	498	1092	1350	931	1229	1168	15.07	18.26	16.86	17.28	16.12	38.3	35.17	36.41	42.54	35.41	16.718	37.566	1.16803	8.75012e-50	1.69384e-48	PEPD	PREDICTED: LOW QUALITY PROTEIN: xaa-Pro dipeptidase [Bactrocera dorsalis]	-	-	-	-	-	GO:0003824//catalytic activity;GO:0046914//transition metal ion binding	GO:0019538//protein metabolic process
LOC105229670	462	370	397	332	315	80	110	92	70	99	17.3	16.4	14.86	14.22	13.8	3.8	3.88	4.87	3.28	4.06	15.316	3.978	-1.94492	1.87856e-49	3.61746e-48	Cfdp1	PREDICTED: craniofacial development protein 1 [Bactrocera dorsalis]	-	-	-	-	-	-	-
LOC105232649	410	298	399	363	347	721	876	513	688	780	6.71	5.78	6.53	6.8	6.65	14.97	13.51	11.88	14.1	14	6.494	13.692	1.07615	2.26979e-49	4.36321e-48	ada2	PREDICTED: adenosine deaminase CECR1-A [Bactrocera dorsalis]	Metabolism;Metabolism	Global and overview maps;Nucleotide metabolism	ko01100//Metabolic pathways;ko00230//Purine metabolism	K19572;K19572	-	-	-
LOC105230320	1806	1659	1734	1810	1402	3597	4386	2496	2989	3482	47.58	51.72	45.66	54.56	43.22	120.18	108.85	92.98	98.55	100.54	48.548	104.22	1.10215	2.4128e-49	4.63006e-48	B1	PREDICTED: esterase B1 [Bactrocera dorsalis]	-	-	-	-	-	-	-
LOC105224985	337	228	437	324	314	1257	1689	1603	1318	1228	12.29	9.84	15.93	13.52	13.4	58.14	58.03	82.67	60.16	49.09	12.996	61.618	2.24528	2.81952e-49	5.40115e-48	--	PREDICTED: pro-resilin-like [Bactrocera oleae]	-	-	-	-	-	-	-
LOC105231055	462	424	436	459	422	143	174	102	144	149	32.98	35.82	31.11	37.49	35.25	12.95	11.7	10.3	12.86	11.66	34.53	11.894	-1.53762	3.04756e-49	5.82786e-48	nip7	PREDICTED: 60S ribosome subunit biogenesis protein NIP7 homolog [Bactrocera dorsalis]	-	-	-	-	GO:0043231//intracellular membrane-bounded organelle	-	GO:0022618//ribonucleoprotein complex assembly
LOC105225293	3663	2975	3442	3028	2912	583	1409	628	774	1051	146.1	140.41	137.21	138.17	135.9	29.49	52.94	35.41	38.63	45.94	139.558	40.482	-1.78551	3.16936e-49	6.05029e-48	eIF2beta	PREDICTED: eukaryotic translation initiation factor 2 subunit 2 [Bactrocera dorsalis]	Genetic Information Processing	Translation	ko03013//RNA transport	K03238	-	-	GO:0006412//translation
LOC105228760	388	384	427	370	374	85	113	86	98	135	16.86	19.75	18.55	18.44	19.02	4.68	4.63	5.28	5.33	6.43	18.524	5.27	-1.81352	3.37768e-49	6.43684e-48	GMFB	PREDICTED: glia maturation factor beta [Bactrocera dorsalis]	-	-	-	-	GO:0044464//cell part	GO:0032403//protein complex binding	GO:0034315//regulation of Arp2/3 complex-mediated actin nucleation
LOC105226812	1556	1383	1728	1460	1255	356	731	335	454	442	40.11	41.85	45.05	42.71	37.4	11.58	17.42	12.4	14.25	12.44	41.424	13.618	-1.60495	3.79412e-49	7.21798e-48	--	PREDICTED: proline-, glutamic acid- and leucine-rich protein 1 [Stomoxys calcitrans]	-	-	-	-	-	-	-
LOC105226034	184	193	194	183	140	430	535	355	393	461	6.04	7.49	6.36	6.87	5.38	17.89	16.54	16.47	16.14	16.58	6.428	16.724	1.37948	3.98605e-49	7.57006e-48	Cyp6d4	PREDICTED: probable cytochrome P450 6d4 [Bactrocera dorsalis]	-	-	-	-	-	GO:0016491//oxidoreductase activity;GO:0046872//metal ion binding;GO:0046906//tetrapyrrole binding	GO:0007423//sensory organ development;GO:0007444//imaginal disc development;GO:0044710//single-organism metabolic process
LOC105226824	45	44	82	51	39	203	341	195	249	314	1.92	2.22	3.5	2.49	1.95	10.99	13.75	11.78	13.32	14.76	2.416	12.92	2.41891	5.01782e-49	9.51317e-48	Cp1	PREDICTED: cathepsin L1 [Bactrocera dorsalis]	Cellular Processes;Human Diseases;Cellular Processes;Human Diseases;Cellular Processes;Cellular Processes;Human Diseases;Organismal Systems	Transport and catabolism;Cancers;Transport and catabolism;Cardiovascular diseases;Transport and catabolism;Cell growth and death;Immune diseases;Immune system	ko04142//Lysosome;ko05205//Proteoglycans in cancer;ko04140//Autophagy - animal;ko05418//Fluid shear stress and atherosclerosis;ko04145//Phagosome;ko04210//Apoptosis;ko05323//Rheumatoid arthritis;ko04612//Antigen processing and presentation	K01365;K01365;K01365;K01365;K01365;K01365;K01365;K01365	-	GO:0008233//peptidase activity	-
LOC105221767	1011	852	1014	974	900	398	574	355	431	452	24.97	24.9	25.03	27.52	26.01	12.47	13.36	12.4	13.32	12.24	25.686	12.758	-1.00958	7.72816e-49	1.46265e-47	snRNP-U1-70K	PREDICTED: U1 small nuclear ribonucleoprotein 70 kDa [Bactrocera dorsalis]	Genetic Information Processing	Transcription	ko03040//Spliceosome	K11093	-	GO:0097159//organic cyclic compound binding	-
LOC105228225	1837	1536	1658	1544	1397	698	951	539	585	813	22.59	22.91	20.89	22.3	20.12	10.89	11.12	9.44	8.97	10.85	21.762	10.254	-1.08562	8.94862e-49	1.68785e-47	CDR2	Cerebellar degeneration-related protein 2-like protein [Bactrocera dorsalis]	-	-	-	-	-	-	-
LOC105222528	953	785	816	761	739	291	430	252	351	364	22.03	21.49	18.86	20.13	19.98	8.55	9.38	8.22	10.16	9.22	20.498	9.106	-1.17059	9.37316e-49	1.76491e-47	rept	PREDICTED: ruvB-like helicase 2 [Bactrocera dorsalis]	-	-	-	-	GO:0000152//nuclear ubiquitin ligase complex;GO:0031248//protein acetyltransferase complex;GO:0033202//DNA helicase complex	GO:0004003//ATP-dependent DNA helicase activity;GO:0032550//purine ribonucleoside binding	GO:0016458//gene silencing;GO:0030154//cell differentiation;GO:0031572//G2 DNA damage checkpoint;GO:0032392//DNA geometric change;GO:0035078//induction of programmed cell death by ecdysone;GO:0035114//imaginal disc-derived appendage morphogenesis
LOC105222842	523	425	482	481	434	759	1147	823	866	943	12.79	12.3	11.78	13.46	12.42	23.55	26.43	28.46	26.51	25.28	12.55	26.046	1.05337	9.83909e-49	1.84948e-47	B1	PREDICTED: esterase B1 [Bactrocera dorsalis]	-	-	-	-	-	-	-
LOC105233276	505	401	496	363	451	96	153	115	96	119	14.89	14	14.62	12.25	15.56	3.59	4.25	4.8	3.54	3.85	14.264	4.006	-1.83214	1.34975e-48	2.53285e-47	--	GM23377 [Drosophila sechellia]	-	-	-	-	-	-	-
MSTRG.1504	2	2	0	0	0	952	1298	1035	1200	1244	0.23	0.27	0	0	0	143.06	144.49	171.25	176.52	160.31	0.1	159.126	10.636	1.41687e-48	2.65429e-47	--	-	-	-	-	-	-	-	-
LOC105232335	3706	3345	3504	3403	3192	7846	9199	5185	5852	7123	41.63	44.47	39.34	43.73	41.96	111.77	97.34	82.35	82.27	87.7	42.226	92.286	1.12798	1.55952e-48	2.91657e-47	CD109	PREDICTED: murinoglobulin-1 [Bactrocera dorsalis]	-	-	-	-	GO:0044421//extracellular region part	-	GO:0010466//negative regulation of peptidase activity
LOC105224452	191	182	235	150	184	489	622	458	574	522	6.6	7.44	8.11	5.93	7.44	21.42	20.24	22.37	24.81	19.76	7.104	21.72	1.61232	1.62822e-48	3.03989e-47	Tmem35a	PREDICTED: transmembrane protein 35A [Bactrocera dorsalis]	-	-	-	-	-	-	-
LOC105224805	1530	1284	1484	1543	1396	599	681	467	568	663	41.9	41.61	40.62	48.35	44.74	20.81	17.57	18.08	19.47	19.9	43.444	19.166	-1.18061	2.01539e-48	3.75638e-47	HSPA14	PREDICTED: heat shock 70 kDa protein 14 [Bactrocera dorsalis]	-	-	-	-	-	GO:0032550//purine ribonucleoside binding	-
LOC105222361	3	3	2	6	11	1256	2270	801	3917	4042	0.29	0.34	0.19	0.65	1.22	151.31	203.04	107.53	465.7	420.78	0.538	269.672	8.96938	2.13373e-48	3.97025e-47	--	PREDICTED: perlucin-like isoform X1 [Bactrocera dorsalis]	-	-	-	-	-	-	-
LOC105232555	1515	1159	1290	1221	1073	221	493	154	244	293	58.75	53.19	50	54.17	48.69	10.87	18.01	8.44	11.84	12.45	52.96	12.322	-2.10367	2.1851e-48	4.05217e-47	nifk	PREDICTED: MKI67 FHA domain-interacting nucleolar phosphoprotein [Bactrocera dorsalis]	-	-	-	-	-	-	-
LOC105226747	51	55	47	69	54	193	295	229	234	291	1.59	2.02	1.46	2.46	1.97	7.61	8.65	10.07	9.11	9.92	1.9	9.072	2.25542	2.2e-48	4.07295e-47	GBA	PREDICTED: glucosylceramidase [Bactrocera dorsalis]	Metabolism;Cellular Processes;Metabolism;Metabolism	Global and overview maps;Transport and catabolism;Lipid metabolism;Glycan biosynthesis and metabolism	ko01100//Metabolic pathways;ko04142//Lysosome;ko00600//Sphingolipid metabolism;ko00511//Other glycan degradation	K01201;K01201;K01201;K01201	-	GO:0016787//hydrolase activity	GO:0006629//lipid metabolic process
LOC105222681	532	463	503	487	477	871	1280	813	1032	1377	19.76	20.35	18.67	20.69	20.73	41.02	44.78	42.69	47.96	56.04	20.04	46.498	1.21429	2.78763e-48	5.1522e-47	FAM8A1	PREDICTED: protein FAM8A1 [Bactrocera dorsalis]	-	-	-	-	-	-	-
LOC105225501	1109	961	1177	1037	955	367	648	333	404	484	30.95	31.73	32.83	33.1	31.18	12.99	17.03	13.14	14.11	14.8	31.958	14.414	-1.14871	3.27921e-48	6.04053e-47	Zpr1	PREDICTED: zinc finger protein ZPR1 [Bactrocera dorsalis]	-	-	-	-	-	-	-
LOC105233746	23	27	28	32	59	722	892	954	1280	815	2.81	3.91	3.42	4.48	8.44	111.99	102.77	164.98	195.92	109.25	4.612	136.982	4.89245	3.90985e-48	7.19021e-47	ANPEP	PREDICTED: aminopeptidase N-like [Bactrocera dorsalis]	Organismal Systems	Endocrine system	ko04614//Renin-angiotensin system	K11141	-	-	-
LOC105225933	1511	1258	1483	1341	1247	3924	5946	3596	6896	8259	20.18	19.91	19.8	20.52	19.5	66.75	75.07	68.11	115.67	121.36	19.982	89.392	2.16144	4.07587e-48	7.48306e-47	GLG1	PREDICTED: Golgi apparatus protein 1 isoform X1 [Bactrocera dorsalis]	-	-	-	-	-	-	-
LOC105230067	217	170	190	188	177	382	500	355	383	414	7.99	7.41	6.99	7.92	7.63	17.84	17.35	18.48	17.65	16.71	7.588	17.606	1.21428	5.17791e-48	9.4748e-47	kraken	PREDICTED: probable serine hydrolase [Bactrocera dorsalis]	-	-	-	-	-	-	-
LOC105233056	777	767	800	785	749	1325	1747	1260	1466	1502	29.87	34.89	30.74	34.53	33.69	64.6	63.27	68.49	70.54	63.29	32.744	66.038	1.01207	5.8825e-48	1.07463e-46	--	PREDICTED: proteasome assembly chaperone 2 [Bactrocera dorsalis]	-	-	-	-	-	-	-
LOC105223074	2148	1699	2193	1871	1765	774	1287	636	845	957	26.95	25.23	27.5	26.86	25.91	12.32	15.21	11.28	13.27	13.16	26.49	13.048	-1.02162	6.01402e-48	1.09684e-46	swm	PREDICTED: RNA-binding protein 26 [Bactrocera dorsalis]	-	-	-	-	-	GO:0003676//nucleic acid binding;GO:0043169//cation binding	GO:0006396//RNA processing
LOC105229038	145	71	111	89	90	356	604	266	409	374	2.74	1.61	1.95	1.75	2.06	6.83	8.81	6.13	7.92	5.96	2.022	7.13	1.81812	6.90995e-48	1.25816e-46	HLF	PREDICTED: AAC-rich mRNA clone AAC11 protein isoform X1 [Bactrocera dorsalis]	Organismal Systems	Environmental adaptation	ko04711//Circadian rhythm - fly	K09057	-	GO:0003677//DNA binding	GO:0010468//regulation of gene expression
LOC105230252	7	11	2	5	8	1082	1986	759	3112	4719	0.18	0.33	0.05	0.14	0.23	34.4	46.9	26.9	97.64	129.66	0.186	67.1	8.49487	7.69255e-48	1.39835e-46	--	PREDICTED: pancreatic triacylglycerol lipase-like [Bactrocera dorsalis]	-	-	-	-	-	GO:0016788//hydrolase activity, acting on ester bonds	-
LOC105225828	54	40	51	50	39	181	226	147	217	269	1.67	1.41	1.94	2.29	1.54	7.92	7.25	6.47	8.87	9.68	1.77	8.038	2.18309	8.46431e-48	1.5361e-46	grass	PREDICTED: serine protease easter isoform X1 [Bactrocera dorsalis]	-	-	-	-	-	-	-
LOC105227961	292	245	239	226	237	39	74	43	53	66	5.53	5.49	4.53	4.9	5.25	0.94	1.32	1.15	1.26	1.37	5.14	1.208	-2.08915	8.64318e-48	1.56599e-46	CG9004	PREDICTED: nucleolar MIF4G domain-containing protein 1 homolog [Bactrocera dorsalis]	-	-	-	-	-	-	-
LOC105228813	2837	2362	2645	3290	2447	6402	9986	5542	5962	6182	58.51	57.56	54.65	77.39	58.85	166.42	192.84	160.31	153.47	140.37	61.392	162.682	1.40593	1.17704e-47	2.12214e-46	--	PREDICTED: solute carrier family 46 member 3 [Bactrocera dorsalis]	-	-	-	-	-	-	GO:0044763//single-organism cellular process
LOC105222132	24	15	15	10	20	176	170	146	152	138	0.67	0.49	0.42	0.32	0.65	6.22	4.46	5.75	5.3	4.21	0.51	5.188	3.34661	1.42366e-47	2.56259e-46	SGSH	PREDICTED: N-sulphoglucosamine sulphohydrolase [Bactrocera dorsalis]	Metabolism;Cellular Processes;Metabolism	Global and overview maps;Transport and catabolism;Glycan biosynthesis and metabolism	ko01100//Metabolic pathways;ko04142//Lysosome;ko00531//Glycosaminoglycan degradation	K01565;K01565;K01565	-	GO:0016788//hydrolase activity, acting on ester bonds	-
LOC105225511	380	283	342	314	290	40	109	36	55	66	17.4	15.37	15.64	16.46	15.57	2.33	4.7	2.33	3.15	3.31	16.088	3.164	-2.34616	1.65298e-47	2.97051e-46	--	PREDICTED: coiled-coil domain-containing protein 137 isoform X1 [Bactrocera dorsalis]	-	-	-	-	-	-	-
LOC105224380	2446	2020	2454	1973	2023	562	526	568	441	571	57.26	55.96	57.41	52.84	55.41	16.68	11.6	18.8	12.92	14.65	55.776	14.93	-1.90143	1.71521e-47	3.07733e-46	--	PREDICTED: O-acyltransferase like protein [Bactrocera dorsalis]	-	-	-	-	-	-	-
LOC105225364	457	360	335	369	331	828	981	674	795	805	13.3	12.4	9.75	12.29	11.27	30.56	26.9	27.74	28.96	25.68	11.802	27.968	1.24475	3.65358e-47	6.53381e-46	Cyp9b2	PREDICTED: cytochrome P450 9b2 [Bactrocera dorsalis]	-	-	-	-	-	GO:0016491//oxidoreductase activity;GO:0046906//tetrapyrrole binding;GO:0046914//transition metal ion binding	GO:0044710//single-organism metabolic process
LOC105222316	376	378	486	375	342	771	1012	661	746	823	6.62	7.88	8.55	7.56	7.05	17.22	16.79	16.46	16.44	15.88	7.532	16.558	1.13642	4.32831e-47	7.72792e-46	CG11141	PREDICTED: WD repeat-containing protein CG11141 [Bactrocera dorsalis]	-	-	-	-	-	-	-
LOC105222294	5330	4864	5589	4421	4900	1853	3200	1701	2065	2223	139.32	150.45	146.02	132.21	149.87	61.43	78.8	62.87	67.55	63.69	143.574	66.868	-1.10241	5.72393e-47	1.01867e-45	Unc-89	Muscle M-line assembly protein unc-89 [Bactrocera dorsalis]	-	-	-	-	-	-	-
LOC105230343	427	345	450	297	322	1549	1533	968	906	1300	14.55	13.91	15.32	11.58	12.84	66.93	49.21	46.64	38.63	48.55	13.64	49.992	1.87385	8.1917e-47	1.45317e-45	-	-	-	-	-	-	-	-	-
LOC105227611	3490	3443	4334	3105	3477	1149	1857	1045	1049	1429	164.84	192.44	204.6	167.78	192.16	68.82	82.62	69.79	62.01	73.97	184.364	71.442	-1.36771	1.00723e-46	1.78061e-45	CG4456	PREDICTED: heat shock protein 67B2 [Bactrocera dorsalis]	-	-	-	-	-	-	-
LOC105232934	582	489	528	404	478	129	206	123	127	184	14.91	14.82	13.52	11.84	14.33	4.19	4.97	4.45	4.07	5.17	13.884	4.57	-1.60316	1.15728e-46	2.03985e-45	dus3l	PREDICTED: tRNA-dihydrouridine(47) synthase [NAD(P)(+)]-like [Bactrocera dorsalis]	-	-	-	-	-	GO:0000166//nucleotide binding;GO:0016627//oxidoreductase activity, acting on the CH-CH group of donors;GO:0043169//cation binding	GO:0006399//tRNA metabolic process;GO:0044710//single-organism metabolic process
LOC105225695	11	10	14	9	4	289	178	141	142	215	1.01	1.09	1.29	0.95	0.43	33.81	15.47	18.39	16.4	21.74	0.954	21.162	4.47134	1.28433e-46	2.25658e-45	--	PREDICTED: glycine-rich cell wall structural protein-like, partial [Bactrocera dorsalis]	-	-	-	-	-	-	-
LOC105229312	1018	859	878	901	829	360	525	286	386	390	9.51	9.49	8.19	9.62	9.06	4.26	4.62	3.78	4.51	3.99	9.174	4.232	-1.11621	1.45622e-46	2.55452e-45	ABCG1	PREDICTED: ABC transporter G family member 6 [Bactrocera dorsalis]	-	-	-	-	-	-	-
LOC105231609	1540	1224	1411	1170	1354	2541	2975	2141	2179	2982	55.86	52.54	51.16	48.56	57.47	116.9	101.66	109.81	98.92	118.56	53.118	109.17	1.0393	1.70995e-46	2.99486e-45	--	PREDICTED: protein takeout [Bactrocera cucurbitae]	-	-	-	-	-	-	-
LOC105230949	220	164	148	182	120	436	608	464	518	575	6.12	5.4	4.11	5.79	3.9	15.37	15.92	18.24	18.02	17.52	5.064	17.014	1.74837	1.88244e-46	3.29173e-45	Cyp6a14	PREDICTED: probable cytochrome P450 6a14 [Bactrocera dorsalis]	-	-	-	-	-	GO:0016491//oxidoreductase activity;GO:0046872//metal ion binding	-
LOC105225968	203	186	248	234	139	1	2	6	0	9	13.99	15.16	17.08	18.44	11.21	0.09	0.13	0.58	0	0.68	15.176	0.296	-5.68005	2.62388e-46	4.58099e-45	--	PREDICTED: translation initiation factor IF-2-like [Bactrocera oleae]	-	-	-	-	-	-	-
LOC105233394	452	346	396	392	302	674	1001	548	660	874	16.33	14.79	14.3	16.2	12.77	30.88	34.07	27.99	29.84	34.61	14.878	31.478	1.08116	2.65333e-46	4.62509e-45	--	GL25983 [Drosophila persimilis]	-	-	-	-	-	GO:0003677//DNA binding	-
LOC105231377	1700	1116	1366	1177	1262	215	535	207	277	350	41.93	32.57	33.67	33.21	36.42	6.73	12.43	7.22	8.55	9.46	35.56	8.878	-2.00195	5.54862e-46	9.62633e-45	CG13096	PREDICTED: ribosomal L1 domain-containing protein CG13096 [Bactrocera dorsalis]	-	-	-	-	-	-	-
LOC115066709	302	285	414	279	223	57	65	38	39	47	31.26	34.79	42.81	32.97	26.92	7.42	6.34	5.53	5.06	5.37	33.75	5.944	-2.50538	6.41388e-46	1.10752e-44	Pcp	PREDICTED: pupal cuticle protein Edg-78E-like [Bactrocera latifrons]	-	-	-	-	-	-	-
LOC105227606	437	322	421	379	399	108	170	95	118	109	22.26	19.41	21.43	22.08	23.78	6.98	8.16	6.84	7.52	6.08	21.792	7.116	-1.61466	7.01919e-46	1.21015e-44	--	PREDICTED: ribosomal RNA processing protein 36 homolog [Bactrocera dorsalis]	-	-	-	-	GO:0043232//intracellular non-membrane-bounded organelle	-	GO:0016072//rRNA metabolic process;GO:0022613//ribonucleoprotein complex biogenesis
LOC105228853	389	334	358	374	311	671	791	572	630	744	23.31	23.68	21.44	25.64	21.8	50.99	44.65	48.46	47.24	48.86	23.174	48.04	1.05173	7.21583e-46	1.24211e-44	Coq7	PREDICTED: 5-demethoxyubiquinone hydroxylase, mitochondrial [Bactrocera dorsalis]	Metabolism;Metabolism	Global and overview maps;Metabolism of cofactors and vitamins	ko01100//Metabolic pathways;ko00130//Ubiquinone and other terpenoid-quinone biosynthesis	K06134;K06134	-	-	GO:0044710//single-organism metabolic process
LOC105224770	684	479	462	986	457	6974	8253	3819	5820	6082	12.88	10.68	8.7	21.25	10.07	166.59	146.44	101.71	137.2	125.56	12.716	135.5	3.41358	7.85963e-46	1.35083e-44	-	-	-	-	-	-	-	-	-
MSTRG.12069	0	1	1	2	0	1073	949	822	2730	2797	0	0.08	0.07	0.16	0	96.49	63.39	82.42	242.27	217.38	0.062	140.39	11.1449	9.56408e-46	1.64121e-44	--	-	-	-	-	-	-	-	-
LOC105233452	30	17	13	19	10	324	628	744	501	437	0.72	0.48	0.31	0.52	0.28	9.9	14.25	25.35	15.11	11.54	0.462	15.23	5.04288	1.24014e-45	2.12479e-44	--	PREDICTED: glycine-rich cell wall structural protein 1 [Bactrocera dorsalis]	-	-	-	-	-	-	-
LOC105225745	1065	893	1086	916	882	355	611	317	363	406	14.92	14.8	15.2	14.68	14.46	6.31	8.06	6.28	6.36	6.23	14.812	6.648	-1.15577	1.53876e-45	2.62828e-44	--	PREDICTED: gastrula zinc finger protein XlCGF26.1 [Bactrocera dorsalis]	-	-	-	-	-	GO:0043169//cation binding	-
LOC105224982	473	411	463	388	402	829	927	719	836	920	11.65	11.98	11.4	10.93	11.59	25.89	21.51	25.04	25.77	24.84	11.51	24.61	1.09636	1.6642e-45	2.83815e-44	Gpaa1	PREDICTED: glycosylphosphatidylinositol anchor attachment 1 protein [Bactrocera dorsalis]	Metabolism;Metabolism	Global and overview maps;Glycan biosynthesis and metabolism	ko01100//Metabolic pathways;ko00563//Glycosylphosphatidylinositol(GPI)-anchor biosynthesis	K05289;K05289	GO:0044425//membrane part	-	-
LOC105229510	0	0	2	2	2	1083	2690	804	3187	4262	0	0	0.09	0.11	0.11	63.85	117.81	52.85	185.43	217.16	0.062	127.42	11.005	2.17133e-45	3.69159e-44	F11	PREDICTED: plasma kallikrein [Bactrocera dorsalis]	Organismal Systems	Immune system	ko04610//Complement and coagulation cascades	K01323	-	GO:0004175//endopeptidase activity	GO:0019538//protein metabolic process
LOC105227679	3964	3226	4383	2939	3232	1217	1810	1179	1122	1342	81.68	79.64	90.61	70.41	78.76	32.7	35.51	34.72	29.38	31.09	80.22	32.68	-1.29555	2.4943e-45	4.23417e-44	Pdk	PREDICTED: pyruvate dehydrogenase (acetyl-transferring) kinase, mitochondrial isoform X2 [Bactrocera dorsalis]	-	-	-	-	-	-	GO:0006796//phosphate-containing compound metabolic process
LOC105222987	572	445	471	480	462	162	222	131	162	214	20.71	19.06	17.04	19.88	19.57	7.44	7.57	6.71	7.34	8.49	19.252	7.51	-1.35812	2.9949e-45	5.07614e-44	CG6073	PREDICTED: protein HGH1 homolog [Bactrocera dorsalis]	-	-	-	-	-	-	-
LOC105224601	934	706	783	798	725	297	438	263	334	391	27.56	24.65	23.09	26.94	25.03	11.12	12.18	10.97	12.34	12.65	25.454	11.852	-1.10276	3.30341e-45	5.59046e-44	pont	PREDICTED: ruvB-like helicase 1 [Bactrocera dorsalis]	Environmental Information Processing	Signal transduction	ko04310//Wnt signaling pathway	K04499	GO:0033202//DNA helicase complex;GO:0043189//H4/H2A histone acetyltransferase complex;GO:0090544//BAF-type complex	GO:0004003//ATP-dependent DNA helicase activity;GO:0008134//transcription factor binding;GO:0032550//purine ribonucleoside binding	GO:0007052//mitotic spindle organization;GO:0010467//gene expression;GO:0031572//G2 DNA damage checkpoint;GO:0032392//DNA geometric change
LOC105225617	1448	1253	1400	1211	1206	523	866	490	517	626	11.97	12.33	11.56	11.5	11.71	5.5	6.72	5.77	5.38	5.73	11.814	5.82	-1.02141	3.6272e-45	6.12902e-44	SENP7	Sentrin-specific protease 7, partial [Bactrocera dorsalis]	-	-	-	-	-	GO:0070011//peptidase activity, acting on L-amino acid peptides	-
LOC105232940	1531	1430	1582	1669	1325	2917	4144	2721	2585	2977	29.97	33.13	30.95	37.38	30.35	72.42	76.42	75.31	63.33	63.87	32.356	70.27	1.11888	3.68794e-45	6.22213e-44	SLC27A4	PREDICTED: long-chain fatty acid transport protein 4 isoform X1 [Bactrocera dorsalis]	Human Diseases;Organismal Systems;Organismal Systems	Endocrine and metabolic diseases;Endocrine system;Digestive system	ko04931//Insulin resistance;ko03320//PPAR signaling pathway;ko04975//Fat digestion and absorption	K08745;K08745;K08745	-	-	-
LOC105231544	1323	1012	1180	1093	1080	522	641	352	495	535	16.75	15.16	14.93	15.83	16	8.38	7.65	6.3	7.84	7.43	15.734	7.52	-1.06508	3.93445e-45	6.6279e-44	Elp1	PREDICTED: putative elongator complex protein 1 [Bactrocera dorsalis]	-	-	-	-	-	-	-
LOC105231225	307	207	165	409	249	3	4	4	2	2	8.68	6.93	4.67	13.24	8.24	0.11	0.11	0.16	0.07	0.06	8.352	0.102	-6.35548	6.17097e-45	1.03481e-43	PNLIPRP2	PREDICTED: phospholipase A1 2 [Bactrocera dorsalis]	-	-	-	-	-	GO:0016788//hydrolase activity, acting on ester bonds	GO:0006629//lipid metabolic process
LOC105224382	600	259	244	253	272	20	11	6	6	18	12.56	6.41	5.1	6.06	6.66	0.53	0.22	0.18	0.16	0.41	7.358	0.3	-4.61628	6.20294e-45	1.03859e-43	--	PREDICTED: LOW QUALITY PROTEIN: O-acyltransferase like protein-like [Bactrocera dorsalis]	-	-	-	-	-	-	-
LOC105226904	1029	793	938	936	769	306	486	255	380	389	33.85	30.87	30.84	35.23	29.6	12.77	15.06	11.86	15.64	14.03	32.078	13.872	-1.20941	6.25174e-45	1.04518e-43	Pwp1	Periodic tryptophan protein 1-like protein, partial [Bactrocera dorsalis]	-	-	-	-	-	-	-
LOC105226111	325	386	279	224	235	2800	4615	2487	1984	1910	8.11	11.39	6.96	6.39	6.86	88.57	108.43	87.71	61.93	52.21	7.942	79.77	3.32827	9.02804e-45	1.50249e-43	Alp-m	PREDICTED: alkaline phosphatase [Bactrocera dorsalis]	Metabolism;Metabolism;Metabolism	Global and overview maps;Metabolism of cofactors and vitamins;Metabolism of cofactors and vitamins	ko01100//Metabolic pathways;ko00790//Folate biosynthesis;ko00730//Thiamine metabolism	K01077;K01077;K01077	-	GO:0016791//phosphatase activity	GO:0006796//phosphate-containing compound metabolic process
LOC105229771	608	539	652	490	572	1753	2328	1033	1295	1503	5.93	6.23	6.36	5.47	6.53	21.71	21.41	14.26	15.83	16.09	6.104	17.86	1.54891	1.0344e-44	1.71891e-43	--	PREDICTED: cytokine receptor-like isoform X1 [Bactrocera dorsalis]	-	-	-	-	-	-	-
LOC105231151	511	386	440	442	381	118	196	103	100	160	13.69	12.24	11.78	13.55	11.95	4.01	4.95	3.9	3.35	4.7	12.642	4.182	-1.59596	1.18496e-44	1.96024e-43	CG6388	PREDICTED: probable tRNA (guanine(26)-N(2))-dimethyltransferase [Bactrocera dorsalis]	-	-	-	-	-	-	-
LOC105221940	544	522	517	483	447	860	1334	787	796	999	3.81	4.33	3.62	3.87	3.67	7.64	8.81	7.8	6.98	7.67	3.86	7.78	1.01117	1.21399e-44	2.00526e-43	-	-	-	-	-	-	-	-	-
LOC105228805	4962	4091	4519	4577	4178	1898	2301	1789	1715	2134	134.86	131.57	122.76	142.32	132.87	65.42	58.91	68.75	58.33	63.57	132.876	62.996	-1.07675	1.53557e-44	2.52888e-43	MTH_209	PREDICTED: N-acylneuraminate-9-phosphatase [Bactrocera dorsalis]	Metabolism;Metabolism	Global and overview maps;Carbohydrate metabolism	ko01100//Metabolic pathways;ko00520//Amino sugar and nucleotide sugar metabolism	K01097;K01097	-	GO:0003824//catalytic activity	-
LOC105232341	1694	1221	1504	1313	1425	6502	8514	3231	3617	5673	11.76	10.03	10.43	10.43	11.57	57.23	55.67	31.71	31.42	43.15	10.844	43.836	2.01522	1.73053e-44	2.84571e-43	Tig	PREDICTED: tiggrin [Bactrocera dorsalis]	-	-	-	-	-	-	-
LOC105232329	1639	2196	2041	1721	2129	406	380	388	381	392	42.53	67.43	52.93	51.09	64.64	13.36	9.29	14.24	12.37	11.15	55.724	12.082	-2.20544	2.74857e-44	4.50634e-43	--	PREDICTED: mucin-5AC [Bactrocera oleae]	-	-	-	-	-	-	-
LOC109579850	18	7	5	8	5	403	491	335	1041	822	3.98	1.83	1.11	2.03	1.29	113.08	102.34	104.81	288.27	199.34	2.048	161.568	6.30178	2.86694e-44	4.69345e-43	--	PREDICTED: dentin sialophosphoprotein-like [Bactrocera latifrons]	-	-	-	-	-	-	-
LOC105234138	144	142	163	118	99	356	569	370	349	381	2.27	2.71	2.62	2.17	1.87	7.23	8.6	8.38	7	6.72	2.328	7.586	1.70425	3.43519e-44	5.61539e-43	ABCG1	PREDICTED: ATP-binding cassette sub-family G member 1 [Bactrocera dorsalis]	-	-	-	-	-	GO:0017111//nucleoside-triphosphatase activity;GO:0032550//purine ribonucleoside binding	-
LOC105223056	1743	1410	1783	1489	1436	492	931	482	592	754	71.17	68.13	72.76	69.55	68.61	25.48	35.81	27.83	30.25	33.74	70.044	30.622	-1.19369	3.5661e-44	5.82076e-43	Psme3	PREDICTED: proteasome activator complex subunit 3 [Bactrocera dorsalis]	Genetic Information Processing;Human Diseases;Organismal Systems	Folding, sorting and degradation;Infectious diseases;Immune system	ko03050//Proteasome;ko05160//Hepatitis C;ko04612//Antigen processing and presentation	K06698;K06698;K06698	GO:0043234//protein complex	-	-
LOC105231274	1997	1143	1065	429	806	19861	21015	13028	20560	23076	163.58	110.79	87.19	40.2	77.25	2063.17	1621.58	1508.88	2107.66	2071.65	95.802	1874.59	4.29037	3.93609e-44	6.41519e-43	Pdf	PREDICTED: protein PDF [Bactrocera dorsalis]	-	-	-	-	-	-	-
LOC105232722	22	25	30	30	11	129	222	105	141	164	0.53	0.71	0.72	0.82	0.31	3.92	5.02	3.56	4.23	4.31	0.618	4.208	2.76746	4.5094e-44	7.33875e-43	--	GM14595 [Drosophila sechellia]	-	-	-	-	-	-	-
LOC105232584	24412	20570	22376	20963	20039	39034	55506	42061	35807	42300	728.47	726.36	667.36	715.65	699.69	1477.18	1560.29	1774.65	1337.22	1383.42	707.506	1506.55	1.09044	5.98159e-44	9.70601e-43	D11DS	PREDICTED: acyl-CoA Delta(11) desaturase [Bactrocera dorsalis]	Organismal Systems;Environmental Information Processing;Metabolism;Organismal Systems;Metabolism	Aging;Signal transduction;Global and overview maps;Endocrine system;Lipid metabolism	ko04212//Longevity regulating pathway - worm;ko04152//AMPK signaling pathway;ko01212//Fatty acid metabolism;ko03320//PPAR signaling pathway;ko01040//Biosynthesis of unsaturated fatty acids	K00507;K00507;K00507;K00507;K00507	-	-	-
LOC105229945	426	351	433	334	419	814	1036	847	810	955	18.79	18.32	19.09	16.85	21.62	45.53	43.04	52.82	44.71	46.17	18.934	46.454	1.29482	6.45184e-44	1.04537e-42	Pex11a	PREDICTED: peroxisomal membrane protein 11B [Bactrocera dorsalis]	Cellular Processes	Transport and catabolism	ko04146//Peroxisome	K13352	-	-	GO:0007031//peroxisome organization
LOC105222530	821	622	742	649	589	277	405	218	265	311	43.13	38.67	38.96	39.01	36.21	18.46	20.04	16.19	17.42	17.91	39.196	18.004	-1.12239	6.64752e-44	1.07549e-42	Max	PREDICTED: protein max [Bactrocera dorsalis]	Human Diseases;Environmental Information Processing;Human Diseases;Human Diseases	Cancers;Signal transduction;Cancers;Cancers	ko05200//Pathways in cancer;ko04010//MAPK signaling pathway;ko05202//Transcriptional misregulation in cancers;ko05222//Small cell lung cancer	K04453;K04453;K04453;K04453	GO:0043231//intracellular membrane-bounded organelle	GO:0001071//nucleic acid binding transcription factor activity;GO:0046983//protein dimerization activity	GO:0006357//regulation of transcription from RNA polymerase II promoter
LOC105222709	280	222	278	281	245	529	616	430	552	592	4.26	3.93	4.03	4.93	4.42	9.96	8.74	8.87	10.24	9.77	4.314	9.516	1.14133	7.81823e-44	1.2612e-42	pyx	PREDICTED: transient receptor potential channel pyrexia isoform X1 [Bactrocera dorsalis]	-	-	-	-	-	-	-
LOC105221789	237	234	282	222	256	572	754	489	479	568	4.09	4.78	4.87	4.39	5.17	12.53	12.27	11.94	10.36	10.75	4.66	11.57	1.31199	8.07573e-44	1.30084e-42	mthl3	PREDICTED: G-protein coupled receptor Mth2 [Bactrocera dorsalis]	-	-	-	-	-	-	-
LOC105233240	1613	1233	1577	1301	1429	406	807	364	467	517	37.86	34.28	36.96	34.87	39.1	12.18	17.85	12.07	13.69	13.29	36.614	13.816	-1.40606	9.44837e-44	1.51973e-42	dnajc2	PREDICTED: dnaJ homolog subfamily C member 2 isoform X1 [Bactrocera dorsalis]	-	-	-	-	-	GO:0005488//binding	-
LOC105228657	79	66	67	100	40	296	569	338	568	600	1.39	1.39	1.2	2	0.82	6.79	9.78	8.74	12.99	12	1.36	10.06	2.88695	1.12847e-43	1.81244e-42	Pu	PREDICTED: GTP cyclohydrolase 1 isoform X1 [Bactrocera dorsalis]	Metabolism;Metabolism	Global and overview maps;Metabolism of cofactors and vitamins	ko01100//Metabolic pathways;ko00790//Folate biosynthesis	K01495;K01495	GO:0044424//intracellular part	GO:0003933//GTP cyclohydrolase activity;GO:0030234//enzyme regulator activity	GO:0002168//instar larval development;GO:0007427//epithelial cell migration, open tracheal system;GO:0009396//folic acid-containing compound biosynthetic process;GO:0009790//embryo development;GO:0019889//pteridine metabolic process;GO:0033301//cell cycle comprising mitosis without cytokinesis;GO:0048069//eye pigmentation;GO:0051336//regulation of hydrolase activity
LOC105230248	4278	3041	3914	3653	3814	987	1878	782	1134	1470	33.63	28.45	30.97	32.48	35.38	9.1	13.16	8.03	10.17	11.79	32.182	10.45	-1.62275	1.3995e-43	2.24449e-42	MYO18A	PREDICTED: unconventional myosin-XVIIIa isoform X1 [Bactrocera dorsalis]	-	-	-	-	-	-	-
LOC105230182	410	376	391	485	359	94	105	75	83	126	10.94	11.88	10.43	14.81	11.21	3.18	2.64	2.83	2.77	3.69	11.854	3.022	-1.9718	1.57181e-43	2.51717e-42	--	Acetylcholine receptor subunit epsilon, partial [Bactrocera dorsalis]	-	-	-	-	GO:0031224//intrinsic component of membrane	-	GO:0006811//ion transport
LOC105225959	1339	1064	1151	1412	1171	3732	4067	3928	5857	6083	72.15	67.97	62.43	87.68	74.41	255.82	207.73	301.06	392.37	358.47	72.928	303.09	2.0552	2.33015e-43	3.72621e-42	--	PREDICTED: uncharacterized protein LOC105225959 [Bactrocera dorsalis]	-	-	-	-	-	-	-
LOC105232248	767	734	885	728	772	285	435	244	304	322	38.56	43.65	44.43	41.85	45.37	18.19	20.6	17.35	19.13	17.73	42.772	18.6	-1.20136	2.46406e-43	3.93465e-42	CCDC43	PREDICTED: coiled-coil domain-containing protein 43 isoform X1 [Bactrocera dorsalis]	-	-	-	-	-	-	-
LOC105231906	2571	2179	2605	2247	2299	846	1559	757	885	1054	27.89	28.17	28.94	27.52	29.23	11.76	15.67	11.64	11.73	12.25	28.35	12.61	-1.16878	2.66419e-43	4.24194e-42	CtBP	PREDICTED: C-terminal-binding protein isoform X1 [Bactrocera dorsalis]	Human Diseases;Environmental Information Processing;Human Diseases;Environmental Information Processing	Cancers;Signal transduction;Cancers;Signal transduction	ko05200//Pathways in cancer;ko04310//Wnt signaling pathway;ko05220//Chronic myeloid leukemia;ko04330//Notch signaling pathway	K04496;K04496;K04496;K04496	-	-	-
LOC105229838	386	341	444	403	331	113	143	76	83	87	6.78	7.06	7.83	8.14	6.78	2.53	2.38	1.9	1.83	1.68	7.318	2.064	-1.82601	3.22523e-43	5.12784e-42	--	AAEL007579-PA [Aedes aegypti]	-	-	-	-	-	-	-
LOC105222257	557	467	549	517	511	170	273	166	180	242	6.18	6.13	6.05	6.58	6.62	2.39	2.84	2.6	2.48	2.94	6.312	2.65	-1.2521	4.11683e-43	6.53599e-42	Zcchc2	PREDICTED: mucin-12 [Bactrocera latifrons]	-	-	-	-	-	GO:0046914//transition metal ion binding	-
LOC105224068	172	135	125	136	136	310	448	257	295	404	5.82	5.4	4.22	5.26	5.38	13.29	14.27	12.29	12.48	14.97	5.216	13.46	1.36766	5.70497e-43	9.04434e-42	Plcxd2	PREDICTED: PI-PLC X domain-containing protein 3 [Bactrocera dorsalis]	-	-	-	-	-	GO:0003824//catalytic activity	-
LOC105224885	508	411	485	409	396	132	224	106	135	187	11.09	10.62	10.58	10.21	10.11	3.65	4.61	3.27	3.69	4.47	10.522	3.938	-1.41787	5.71403e-43	9.04571e-42	PUS7	PREDICTED: pseudouridylate synthase 7 homolog [Bactrocera dorsalis]	-	-	-	-	-	GO:0003676//nucleic acid binding;GO:0016866//intramolecular transferase activity	GO:0016070//RNA metabolic process
LOC105231877	507	422	518	428	387	112	142	101	67	141	12.78	12.58	13.05	12.37	11.41	3.58	3.37	3.6	2.11	3.89	12.438	3.31	-1.90985	5.98977e-43	9.46864e-42	CRISP3	PREDICTED: cysteine-rich secretory protein LCCL domain-containing 2 isoform X1 [Bactrocera dorsalis]	-	-	-	-	-	-	-
LOC105224053	209	142	223	188	176	474	505	395	432	518	19.9	16	21.22	20.48	19.61	57.24	45.3	53.18	51.48	54.06	19.442	52.252	1.42631	1.09797e-42	1.73318e-41	-	-	-	-	-	-	-	-	-
LOC105223075	787	674	638	714	619	178	333	134	176	216	32.48	32.92	26.32	33.71	29.89	9.32	12.95	7.82	9.09	9.77	31.064	9.79	-1.66586	1.14333e-42	1.80222e-41	Polr1c	PREDICTED: DNA-directed RNA polymerases I and III subunit RPAC1 [Bactrocera dorsalis]	Metabolism;Metabolism;Human Diseases;Metabolism;Genetic Information Processing;Organismal Systems	Global and overview maps;Nucleotide metabolism;Infectious diseases;Nucleotide metabolism;Transcription;Immune system	ko01100//Metabolic pathways;ko00230//Purine metabolism;ko05169//Epstein-Barr virus infection;ko00240//Pyrimidine metabolism;ko03020//RNA polymerase;ko04623//Cytosolic DNA-sensing pathway	K03027;K03027;K03027;K03027;K03027;K03027	-	GO:0005515//protein binding;GO:0016772//transferase activity, transferring phosphorus-containing groups	GO:0034645//cellular macromolecule biosynthetic process
LOC105229456	468	411	495	432	418	744	1076	619	694	762	12.19	12.89	12.69	13.35	12.93	33.45	33.61	27.23	30.02	28.59	12.81	30.58	1.25532	1.44287e-42	2.26789e-41	GlcAT-P	PREDICTED: galactosylgalactosylxylosylprotein 3-beta-glucuronosyltransferase P isoform X1 [Bactrocera dorsalis]	-	-	-	-	-	GO:0015020//glucuronosyltransferase activity	-
LOC105229256	1426	982	1101	1240	1062	349	447	294	409	492	108.32	88.27	83.59	107.76	94.39	33.62	31.99	31.58	38.88	40.96	96.466	35.406	-1.44603	1.54175e-42	2.41986e-41	NHP2	PREDICTED: H/ACA ribonucleoprotein complex subunit 2-like protein [Bactrocera dorsalis]	Genetic Information Processing	Translation	ko03008//Ribosome biogenesis in eukaryotes	K11129	GO:0030529//intracellular ribonucleoprotein complex	GO:0003723//RNA binding	GO:0000154//rRNA modification;GO:0033554//cellular response to stress
LOC105223080	1673	1024	1241	1197	1112	205	483	193	264	372	53.01	38.39	39.3	43.39	41.23	8.24	14.42	8.65	10.47	12.92	43.064	10.94	-1.97687	1.61185e-42	2.5263e-41	Ns1	PREDICTED: guanine nucleotide-binding protein-like 3 homolog isoform X1 [Bactrocera dorsalis]	Genetic Information Processing	Translation	ko03008//Ribosome biogenesis in eukaryotes	K14538	-	-	-
LOC105222965	13365	10406	13101	9808	11023	4312	6518	3120	3970	5592	104.08	95.85	101.85	87.4	100.37	42.51	47.8	34.3	38.64	47.67	97.91	42.184	-1.21476	1.67416e-42	2.62025e-41	ABCA3	PREDICTED: ATP-binding cassette sub-family A member 3 [Bactrocera dorsalis]	Environmental Information Processing	Membrane transport	ko02010//ABC transporters	K05643	GO:0031224//intrinsic component of membrane	GO:0017111//nucleoside-triphosphatase activity;GO:0032550//purine ribonucleoside binding	GO:0051234//establishment of localization
LOC105229284	511	451	612	449	477	951	1181	776	825	990	13.5	14.1	16.16	13.57	14.74	31.85	29.38	28.98	27.27	28.66	14.414	29.228	1.01988	2.32176e-42	3.6133e-41	Grik2	Glutamate receptor ionotropic, kainate 2, partial [Bactrocera dorsalis]	-	-	-	-	GO:0031224//intrinsic component of membrane;GO:0097060//synaptic membrane	GO:0005231//excitatory extracellular ligand-gated ion channel activity	GO:0006811//ion transport;GO:0007215//glutamate receptor signaling pathway;GO:0050804//modulation of synaptic transmission
LOC105233729	1173	1006	1225	882	928	117	187	100	221	263	34.63	35.15	36.15	29.79	32.06	4.38	5.2	4.17	8.17	8.51	33.556	6.086	-2.463	2.9801e-42	4.62481e-41	Scd1	PREDICTED: acyl-CoA Delta(11) desaturase [Bactrocera dorsalis]	Organismal Systems;Environmental Information Processing;Metabolism;Organismal Systems;Metabolism	Aging;Signal transduction;Global and overview maps;Endocrine system;Lipid metabolism	ko04212//Longevity regulating pathway - worm;ko04152//AMPK signaling pathway;ko01212//Fatty acid metabolism;ko03320//PPAR signaling pathway;ko01040//Biosynthesis of unsaturated fatty acids	K00507;K00507;K00507;K00507;K00507	GO:0031224//intrinsic component of membrane;GO:0043231//intracellular membrane-bounded organelle	GO:0016705//oxidoreductase activity, acting on paired donors, with incorporation or reduction of molecular oxygen	GO:0006631//fatty acid metabolic process
LOC105229674	2	6	11	11	7	839	817	796	2951	1733	0.25	0.89	1.38	1.58	1.03	133.5	96.57	141.22	463.38	238.31	1.026	214.596	7.70845	3.8963e-42	6.03818e-41	--	PREDICTED: protein starmaker-like [Bactrocera cucurbitae]	-	-	-	-	-	-	-
LOC105225340	1072	1021	975	1100	881	326	509	323	392	407	11.63	13.11	10.57	13.66	11.19	4.49	5.2	4.96	5.32	4.84	12.032	4.962	-1.27788	4.06488e-42	6.29059e-41	-	-	-	-	-	-	-	-	-
LOC105229387	1377	1086	1155	1083	1089	140	422	130	197	250	29.9	27.9	25.06	26.9	27.67	3.85	8.63	3.99	5.35	5.95	27.486	5.554	-2.3071	4.99727e-42	7.70111e-41	CG9246	PREDICTED: LOW QUALITY PROTEIN: nucleolar complex protein 2 homolog [Bactrocera dorsalis]	-	-	-	-	-	-	-
LOC105232631	2099	1647	1916	1736	1732	551	1066	464	648	800	23.47	21.8	21.57	22.24	22.75	7.8	11.27	7.32	9.07	9.87	22.366	9.066	-1.30277	5.07388e-42	7.80825e-41	SRRM1	PREDICTED: serine/arginine repetitive matrix protein 1 [Bactrocera dorsalis]	Genetic Information Processing;Genetic Information Processing	Translation;Translation	ko03013//RNA transport;ko03015//mRNA surveillance pathway	K13171;K13171	-	-	-
LOC105228713	903	644	637	713	630	1330	1645	1185	1379	1462	30.55	25.79	21.54	27.6	24.94	57.07	52.43	56.69	58.39	54.22	26.084	55.76	1.09607	6.8237e-42	1.04864e-40	Idgf3	PREDICTED: chitinase-like protein Idgf3 [Bactrocera dorsalis]	-	-	-	-	-	GO:0004553//hydrolase activity, hydrolyzing O-glycosyl compounds	GO:0006026//aminoglycan catabolic process;GO:0044238//primary metabolic process
LOC105228069	93	62	74	52	47	371	322	256	423	543	3.61	2.85	2.87	2.31	2.14	18.27	11.78	14.06	20.56	23.11	2.756	17.556	2.67132	7.86737e-42	1.20735e-40	--	PREDICTED: uncharacterized protein LOC105228069 [Bactrocera dorsalis]	-	-	-	-	-	-	-
LOC105223825	294	256	295	291	311	671	748	460	631	711	15.8	16.28	15.85	17.9	19.56	45.74	37.88	34.96	42.45	41.89	17.078	40.584	1.24877	9.04728e-42	1.38457e-40	LCP17	PREDICTED: cuticle protein 16.8 [Bactrocera dorsalis]	-	-	-	-	-	-	-
LOC105230497	3994	3542	3720	3775	3180	6763	7329	5958	6810	7262	150.73	157.53	140.28	162.49	140.51	323.41	260.64	318.51	321.64	300.71	150.308	304.982	1.0208	1.30508e-41	1.9945e-40	--	PREDICTED: fibroin heavy chain [Bactrocera oleae]	-	-	-	-	-	-	-
LOC105233284	474	183	188	183	208	2647	3015	1562	2746	2511	41.92	19.15	16.62	18.51	21.52	296.86	251.16	195.31	303.91	243.37	23.544	258.122	3.45462	1.59428e-41	2.4331e-40	--	PREDICTED: glycine-rich cell wall structural protein-like [Bactrocera dorsalis]	-	-	-	-	-	-	-
LOC105223721	1179	1007	1251	1090	1067	314	617	353	336	459	30.85	31.18	32.72	32.63	32.67	10.42	15.21	13.06	11	13.16	32.01	12.57	-1.34854	1.77187e-41	2.69667e-40	--	Alpha-(1,3)-fucosyltransferase B [Lucilia cuprina]	-	-	-	-	-	-	-
LOC105233883	6	4	2	9	2	166	176	91	132	292	0.34	0.27	0.11	0.59	0.13	11.97	9.43	7.31	9.39	18.19	0.288	11.258	5.28874	1.77545e-41	2.6984e-40	LCP17	PREDICTED: endocuticle structural glycoprotein ABD-4 [Bactrocera dorsalis]	-	-	-	-	-	-	-
LOC105231339	703	520	513	1038	671	85	80	42	84	48	17.57	15.38	12.82	29.69	19.63	2.69	1.88	1.48	2.63	1.32	19.018	2	-3.24929	2.43133e-41	3.69014e-40	EGFL7	Epidermal growth factor-like protein 8 [Ceratitis capitata]	-	-	-	-	-	-	-
LOC105229074	1731	1385	1509	1337	1309	410	816	455	484	636	27.68	26.21	24.12	24.46	24.49	8.31	12.29	10.29	9.69	11.15	25.392	10.346	-1.2953	2.89926e-41	4.39429e-40	Mtrex	PREDICTED: superkiller viralicidic activity 2-like 2 [Bactrocera dorsalis]	Genetic Information Processing	Folding, sorting and degradation	ko03018//RNA degradation	K12598	GO:0005681//spliceosomal complex	GO:0017111//nucleoside-triphosphatase activity;GO:0032550//purine ribonucleoside binding	GO:0000377//RNA splicing, via transesterification reactions with bulged adenosine as nucleophile;GO:0030154//cell differentiation
LOC105225106	136	143	147	119	112	312	482	333	283	418	1.6	1.99	1.73	1.6	1.54	4.66	5.34	5.54	4.17	5.39	1.692	5.02	1.56896	2.92106e-41	4.42126e-40	Eogt	PREDICTED: LOW QUALITY PROTEIN: EGF domain-specific O-linked N-acetylglucosamine transferase [Bactrocera dorsalis]	Metabolism	Glycan biosynthesis and metabolism	ko00514//Other types of O-glycan biosynthesis	K18134	-	GO:0016740//transferase activity	-
LOC105224006	2182	2267	2802	2046	2223	842	1044	751	743	965	42.44	52.18	54.49	45.55	50.6	20.78	19.14	20.66	18.1	20.58	49.052	19.852	-1.30503	3.68289e-41	5.5591e-40	Hsc70-1	PREDICTED: heat shock 70 kDa protein cognate 1 [Bactrocera dorsalis]	Genetic Information Processing;Genetic Information Processing;Cellular Processes;Human Diseases;Environmental Information Processing;Human Diseases;Organismal Systems;Organismal Systems;Human Diseases;Human Diseases;Human Diseases;Organismal Systems;Human Diseases	Transcription;Folding, sorting and degradation;Transport and catabolism;Infectious diseases;Signal transduction;Infectious diseases;Endocrine system;Aging;Infectious diseases;Infectious diseases;Infectious diseases;Immune system;Neurodegenerative diseases	ko03040//Spliceosome;ko04141//Protein processing in endoplasmic reticulum;ko04144//Endocytosis;ko05169//Epstein-Barr virus infection;ko04010//MAPK signaling pathway;ko05164//Influenza A;ko04915//Estrogen signaling pathway;ko04213//Longevity regulating pathway - multiple species;ko05145//Toxoplasmosis;ko05162//Measles;ko05134//Legionellosis;ko04612//Antigen processing and presentation;ko05020//Pri…	K03283;K03283;K03283;K03283;K03283;K03283;K03283;K03283;K03283;K03283;K03283;K03283;K03283	GO:0043231//intracellular membrane-bounded organelle;GO:0043232//intracellular non-membrane-bounded organelle;GO:0043234//protein complex	GO:0005515//protein binding;GO:0017111//nucleoside-triphosphatase activity;GO:0032550//purine ribonucleoside binding	GO:0006950//response to stress
LOC105234072	239	270	210	288	230	724	1126	719	785	667	8.8	11.69	7.72	12.13	9.9	33.79	39.04	37.41	36.13	26.9	10.048	34.654	1.78611	4.40646e-41	6.63314e-40	--	Phospholipase A2 isozymes PA3A/PA3B/PA5 [Ceratitis capitata]	Metabolism;Organismal Systems;Environmental Information Processing;Organismal Systems;Metabolism;Organismal Systems;Metabolism;Metabolism;Metabolism;Metabolism	Global and overview maps;Digestive system;Signal transduction;Circulatory system;Lipid metabolism;Digestive system;Lipid metabolism;Lipid metabolism;Lipid metabolism;Lipid metabolism	ko01100//Metabolic pathways;ko04972//Pancreatic secretion;ko04014//Ras signaling pathway;ko04270//Vascular smooth muscle contraction;ko00564//Glycerophospholipid metabolism;ko04975//Fat digestion and absorption;ko00565//Ether lipid metabolism;ko00590//Arachidonic acid metabolism;ko00592//alpha-Linolenic acid metabolism;ko00591//Linoleic acid metabolism	K01047;K01047;K01047;K01047;K01047;K01047;K01047;K01047;K01047;K01047	-	-	GO:0006629//lipid metabolic process
LOC105221808	421	359	392	340	379	109	185	85	119	142	21.18	21.37	19.71	19.57	22.31	6.95	8.77	6.05	7.49	7.83	20.828	7.418	-1.48942	4.48391e-41	6.74052e-40	DNTTIP2	PREDICTED: deoxynucleotidyltransferase terminal-interacting protein 2 [Bactrocera dorsalis]	-	-	-	-	-	GO:0003824//catalytic activity	-
LOC105233967	495	444	499	522	465	825	1093	669	875	1101	26.26	27.88	26.46	31.69	28.87	55.51	54.63	50.19	58.1	64.03	28.232	56.492	1.00072	4.93933e-41	7.41505e-40	PSMB5	PREDICTED: proteasome subunit beta type-5-like [Bactrocera dorsalis]	Genetic Information Processing	Folding, sorting and degradation	ko03050//Proteasome	K02737	GO:0043231//intracellular membrane-bounded organelle;GO:0043234//protein complex	GO:0004175//endopeptidase activity	GO:0006508//proteolysis
LOC105227538	153	129	174	134	126	297	404	238	277	357	4.58	4.57	5.21	4.59	4.42	11.28	11.4	10.08	10.39	11.72	4.674	10.974	1.23136	5.62409e-41	8.42011e-40	Ppox	Protoporphyrinogen oxidase, partial [Bactrocera dorsalis]	Metabolism;Metabolism	Global and overview maps;Metabolism of cofactors and vitamins	ko01100//Metabolic pathways;ko00860//Porphyrin and chlorophyll metabolism	K00231;K00231	-	GO:0003824//catalytic activity	GO:0006778//porphyrin-containing compound metabolic process;GO:0044710//single-organism metabolic process
LOC105233502	1328	982	1068	995	1009	385	663	336	408	487	28.93	25.31	23.25	24.8	25.72	10.64	13.6	10.35	11.12	11.63	25.602	11.468	-1.15864	6.0244e-41	8.99502e-40	Mys45A	PREDICTED: protein SDA1 homolog [Bactrocera dorsalis]	-	-	-	-	GO:0043232//intracellular non-membrane-bounded organelle	-	GO:0000054//ribosomal subunit export from nucleus;GO:0007010//cytoskeleton organization;GO:0030154//cell differentiation
LOC105225222	3	0	4	0	4	623	2016	578	2208	2726	0.18	0	0.24	0	0.28	46.55	111.9	48.15	162.82	176.04	0.14	109.092	9.6059	6.65576e-41	9.92428e-40	--	PREDICTED: LOW QUALITY PROTEIN: venom allergen 5-like [Bactrocera dorsalis]	-	-	-	-	-	-	-
LOC105228933	633	428	468	470	432	55	162	52	64	97	16.77	13.36	12.39	14.21	13.37	1.87	4.05	1.98	2.08	2.76	14.02	2.548	-2.46005	7.33355e-41	1.09202e-39	Pinx1	PREDICTED: PIN2/TERF1-interacting telomerase inhibitor 1 isoform X1 [Bactrocera dorsalis]	-	-	-	-	-	-	-
LOC105233186	1243	1172	1370	1239	1211	475	763	448	564	562	29.79	32.78	32.29	34.39	33.77	14.53	17.16	14.99	17.24	14.41	32.604	15.666	-1.05741	8.36563e-41	1.24402e-39	Zip99C	PREDICTED: zinc transporter ZIP13 homolog [Bactrocera dorsalis]	-	-	-	-	GO:0016020//membrane;GO:0043231//intracellular membrane-bounded organelle	GO:0046915//transition metal ion transmembrane transporter activity	GO:0000041//transition metal ion transport;GO:0044763//single-organism cellular process;GO:0048871//multicellular organismal homeostasis
LOC105224070	1011	955	1063	902	800	217	477	208	228	300	26.51	29.63	27.85	27.05	24.54	7.21	11.78	7.71	7.48	8.62	27.116	8.56	-1.66346	9.56492e-41	1.42045e-39	--	GH13240 [Drosophila grimshawi]	-	-	-	-	-	-	-
LOC105226093	373	296	345	338	357	75	132	45	66	99	3.26	3.13	2.86	3.34	3.34	0.79	1.11	0.58	0.68	0.87	3.186	0.806	-1.98289	9.73971e-41	1.44446e-39	Antp	PREDICTED: homeotic protein antennapedia isoform X1 [Bactrocera dorsalis]	-	-	-	-	-	-	-
LOC105222268	493	374	425	424	369	75	173	73	111	138	33.75	30.3	29.08	33.2	29.56	6.51	11.16	7.07	9.51	10.35	31.178	8.92	-1.80541	2.043e-40	3.01773e-39	FKBP59	PREDICTED: FK506-binding protein 59 [Bactrocera dorsalis]	Organismal Systems	Endocrine system	ko04915//Estrogen signaling pathway	K09571	-	-	-
LOC105225702	115	98	93	98	78	240	366	229	218	265	1.06	1.07	0.86	1.04	0.84	2.82	3.19	3	2.53	2.69	0.974	2.846	1.54694	2.21631e-40	3.26936e-39	ARAP2	Arf-GAP with Rho-GAP domain, ANK repeat and PH domain-containing protein 2 [Ceratitis capitata]	-	-	-	-	GO:0044464//cell part	-	GO:0043087//regulation of GTPase activity
LOC105233179	22	29	12	15	21	188	171	109	191	188	0.99	1.54	0.54	0.77	1.1	10.72	7.24	6.93	10.75	9.26	0.988	8.98	3.18413	2.2422e-40	3.30313e-39	--	AGAP004674-PA [Anopheles gambiae str. PEST] [Anopheles gambiae]	-	-	-	-	-	-	-
LOC105227023	582	453	500	478	469	46	156	53	48	66	26.92	24.79	23.11	25.29	25.38	2.7	6.8	3.47	2.78	3.35	25.098	3.82	-2.71593	3.3568e-40	4.92539e-39	-	-	-	-	-	-	-	-	-
LOC105233416	2955	2261	2628	2402	2531	1057	1715	805	1073	1214	40.78	36.93	36.33	37.83	40.83	18.48	22.29	15.7	18.46	18.3	38.54	18.646	-1.04749	3.42402e-40	5.01735e-39	--	Zinc finger Y-chromosomal protein 2 [Ceratitis capitata]	-	-	-	-	GO:0005700//polytene chromosome;GO:0031010//ISWI-type complex	GO:0005488//binding	GO:0007346//regulation of mitotic cell cycle;GO:0008593//regulation of Notch signaling pathway;GO:0030154//cell differentiation;GO:0030518//intracellular steroid hormone receptor signaling pathway;GO:0046425//regulation of JAK-STAT cascade;GO:0051276//chromosome organization
LOC105222878	478	378	380	422	351	78	173	82	82	98	12.28	11.49	9.76	12.4	10.55	2.54	4.19	2.98	2.64	2.76	11.296	3.022	-1.90224	3.80089e-40	5.56221e-39	Ddx52	PREDICTED: probable ATP-dependent RNA helicase DDX52 [Bactrocera dorsalis]	-	-	-	-	-	GO:0017111//nucleoside-triphosphatase activity;GO:0032550//purine ribonucleoside binding	-
LOC105225031	666	658	668	746	626	223	290	217	208	251	19.06	22.29	19.11	24.42	20.97	8.09	7.82	8.78	7.45	7.87	21.17	8.002	-1.40359	3.91944e-40	5.72809e-39	--	Nicotinamide riboside kinase 1 [Bactrocera dorsalis]	-	-	-	-	-	-	-
LOC105225550	482	391	503	477	436	154	199	96	148	190	8.67	8.32	9.04	9.81	9.18	3.51	3.37	2.44	3.33	3.75	9.004	3.28	-1.45687	4.50631e-40	6.57707e-39	TMEM201	Transmembrane protein 201 [Bactrocera dorsalis]	-	-	-	-	-	-	-
LOC105232052	741	619	750	827	614	1315	1626	1150	1452	1721	26.7	26.39	27.01	34.09	25.89	60.09	55.19	58.59	65.47	67.96	28.016	61.46	1.1334	4.80075e-40	6.99756e-39	Yipf1	PREDICTED: protein YIPF1 [Bactrocera dorsalis]	-	-	-	-	GO:0031224//intrinsic component of membrane	-	-
LOC105228182	2110	1854	2311	1597	1678	437	699	463	533	813	69.3	72.06	75.98	60.24	64.56	18.31	21.67	21.45	21.97	29.42	68.428	22.564	-1.60056	4.95172e-40	7.20808e-39	armt1	PREDICTED: protein-glutamate O-methyltransferase isoform X1 [Bactrocera dorsalis]	-	-	-	-	-	-	-
LOC105224891	1448	1268	1415	1342	1116	2833	4025	2324	3842	5069	37.45	38.8	36.57	39.7	33.77	92.91	98.05	84.98	124.34	143.67	37.258	108.79	1.54592	5.05078e-40	7.34259e-39	LMAN1	PREDICTED: protein ERGIC-53 [Bactrocera dorsalis]	Genetic Information Processing	Folding, sorting and degradation	ko04141//Protein processing in endoplasmic reticulum	K10080	-	-	-
LOC105230757	3353	2907	3422	3567	2899	5484	7949	5588	5959	5692	46.85	48.07	47.79	57.03	47.4	97.19	104.64	110.41	104.21	87.18	49.428	100.726	1.02704	5.07793e-40	7.37236e-39	-	-	-	-	-	-	-	-	-
LOC105226497	673	603	708	533	644	137	276	145	213	213	8.82	9.31	9.29	7.99	9.88	2.27	3.39	2.66	3.51	3.02	9.058	2.97	-1.60873	5.44591e-40	7.88585e-39	Mdr65	PREDICTED: multidrug resistance protein homolog 65 [Bactrocera dorsalis]	Human Diseases;Organismal Systems;Human Diseases;Environmental Information Processing	Cancers;Digestive system;Cancers;Membrane transport	ko05206//MicroRNAs in cancer;ko04976//Bile secretion;ko05226//Gastric cancer;ko02010//ABC transporters	K05658;K05658;K05658;K05658	GO:0031224//intrinsic component of membrane	GO:0015405//P-P-bond-hydrolysis-driven transmembrane transporter activity;GO:0017111//nucleoside-triphosphatase activity;GO:0032550//purine ribonucleoside binding	GO:0044763//single-organism cellular process;GO:0051234//establishment of localization
LOC105226226	355	289	316	355	282	872	1009	587	748	684	5.68	5.48	5.06	6.5	5.28	17.71	15.22	13.29	14.99	12	5.6	14.642	1.38661	5.55734e-40	8.03666e-39	Slc17a5	GH19798 [Drosophila grimshawi]	-	-	-	-	-	-	GO:0044763//single-organism cellular process
LOC105227064	247	182	249	244	188	493	583	469	447	549	8.84	7.74	8.82	9.92	7.83	22.02	19.51	23.57	19.92	21.36	8.63	21.276	1.30179	5.82362e-40	8.41071e-39	nudt18	PREDICTED: 8-oxo-dGDP phosphatase NUDT18 [Bactrocera dorsalis]	-	-	-	-	-	GO:0003676//nucleic acid binding;GO:0003824//catalytic activity	-
LOC105231622	408	333	281	414	313	820	1147	693	732	924	14.67	14.58	10.17	17.01	13.33	37.34	38.8	35.19	33.48	36.36	13.952	36.234	1.37687	5.87187e-40	8.46931e-39	PPAF2	PREDICTED: chymotrypsin-like protease CTRL-1 [Bactrocera dorsalis]	-	-	-	-	-	GO:0004175//endopeptidase activity	GO:0019538//protein metabolic process
LOC105222429	953	784	909	840	850	251	509	238	308	328	14.06	13.69	13.4	14.18	14.67	4.7	7.07	4.96	5.69	5.3	14	5.544	-1.33643	6.25682e-40	9.00101e-39	Znf598	PREDICTED: zinc finger protein 598 [Bactrocera dorsalis]	-	-	-	-	-	-	-
LOC109579495	669	488	565	501	464	1206	1467	1096	1680	1916	66.94	57.8	56.51	57.37	54.38	152.98	138.25	155.01	210.32	210.04	58.6	173.32	1.56447	7.00514e-40	1.00513e-38	l(2)k12914	PREDICTED: dolichyl-diphosphooligosaccharide--protein glycosyltransferase subunit DAD1 [Bactrocera oleae]	Metabolism;Genetic Information Processing;Metabolism	Global and overview maps;Folding, sorting and degradation;Glycan biosynthesis and metabolism	ko01100//Metabolic pathways;ko04141//Protein processing in endoplasmic reticulum;ko00510//N-Glycan biosynthesis	K12668;K12668;K12668	GO:0031090//organelle membrane;GO:0031224//intrinsic component of membrane;GO:0043231//intracellular membrane-bounded organelle	GO:0004576//oligosaccharyl transferase activity	GO:0006464//cellular protein modification process;GO:0042981//regulation of apoptotic process
LOC105232406	0	1	1	1	3	614	1200	601	2108	2485	0	0.06	0.05	0.06	0.18	39.17	56.87	42.75	132.72	137.01	0.07	81.704	10.1888	8.98438e-40	1.28578e-38	--	Angiopoietin-related protein 1 [Bactrocera dorsalis]	-	-	-	-	-	-	-
LOC105232760	915	741	844	713	779	253	421	242	279	402	13.27	12.75	12.24	11.89	13.32	4.69	5.74	4.98	5.03	6.45	12.694	5.378	-1.23901	9.01042e-40	1.28784e-38	Prpf4b	PREDICTED: serine/threonine-protein kinase PRP4 homolog [Bactrocera dorsalis]	-	-	-	-	-	GO:0016772//transferase activity, transferring phosphorus-containing groups	-
LOC105226260	8	2	9	16	4	918	1721	372	1772	2773	0.58	0.17	0.65	1.33	0.34	84.58	117.78	38.21	161.11	220.8	0.614	124.496	7.66365	9.83883e-40	1.40442e-38	--	PREDICTED: uncharacterized protein LOC105226260 [Bactrocera dorsalis]	-	-	-	-	-	-	-
LOC105224047	7	3	0	2	8	98	179	113	195	126	0.22	0.11	0	0.07	0.3	3.94	5.34	5.06	7.73	4.37	0.14	5.288	5.23922	9.87264e-40	1.40743e-38	-	-	-	-	-	-	-	-	-
LOC105223251	496	465	465	479	392	781	1062	636	906	1039	26.66	29.58	24.98	29.46	24.66	53.24	53.78	48.34	60.95	61.21	27.068	55.504	1.036	1.0403e-39	1.48111e-38	CG5021	PREDICTED: uncharacterized Golgi apparatus membrane protein-like protein CG5021 isoform X1 [Bactrocera dorsalis]	-	-	-	-	GO:0031224//intrinsic component of membrane	-	-
LOC105225268	3047	2465	2586	3614	2570	897	1244	656	737	996	73.42	70.29	62.28	99.63	72.46	27.41	28.24	22.35	22.23	26.3	75.616	25.306	-1.57921	1.05813e-39	1.50456e-38	CarT	PREDICTED: organic cation transporter protein-like [Bactrocera dorsalis]	-	-	-	-	-	GO:0005215//transporter activity	GO:0044763//single-organism cellular process
LOC105231735	856	636	735	589	619	147	321	162	154	224	8.21	7.22	7.05	6.47	6.95	1.79	2.9	2.2	1.85	2.36	7.18	2.22	-1.69342	1.10349e-39	1.56704e-38	BAZ1A	PREDICTED: bromodomain adjacent to zinc finger domain protein 1A [Bactrocera dorsalis]	-	-	-	-	-	GO:0043169//cation binding	-
LOC105223528	8	3	4	4	12	568	831	739	2617	1613	0.45	0.2	0.22	0.26	0.8	40.41	43.68	59.33	185.41	99.14	0.386	85.594	7.79277	1.14754e-39	1.6275e-38	--	PREDICTED: transcription initiation factor TFIID subunit 11-like isoform X1 [Bactrocera dorsalis]	-	-	-	-	-	-	-
LOC105232107	692	556	575	510	625	194	296	152	174	224	12.89	12.26	10.71	10.87	13.63	4.58	5.2	4	4.06	4.57	12.072	4.482	-1.42945	1.23338e-39	1.74475e-38	Naa30A	PREDICTED: N-alpha-acetyltransferase 30 [Bactrocera dorsalis]	-	-	-	-	-	GO:0003824//catalytic activity	-
LOC105222906	716	517	650	728	648	1530	1669	1052	1295	1446	26.66	22.35	23.35	30.37	27.45	71.13	57.91	54.4	59.93	57.94	26.036	60.262	1.21074	1.31853e-39	1.86282e-38	Spn42Dd	PREDICTED: serine protease inhibitor 42Dd isoform X1 [Bactrocera dorsalis]	-	-	-	-	-	-	-
LOC105231427	12	17	18	32	11	161	178	169	149	159	0.21	0.35	0.31	0.63	0.22	3.5	2.88	4.1	3.2	2.99	0.344	3.334	3.27677	1.38055e-39	1.94796e-38	MP1	Venom protease [Bactrocera dorsalis]	-	-	-	-	-	GO:0004175//endopeptidase activity;GO:0043169//cation binding;GO:0097159//organic cyclic compound binding	GO:0019538//protein metabolic process
LOC115066352	496	437	572	398	581	108	132	104	71	101	9.97	10.39	11.49	9.15	13.66	2.75	2.5	2.96	1.79	2.22	10.932	2.444	-2.16124	1.54129e-39	2.17199e-38	--	PREDICTED: sodium- and chloride-dependent glycine transporter 1-like, partial [Rhagoletis zephyria]	-	-	-	-	-	-	-
LOC105228201	2926	2544	2781	2922	2521	5248	5523	4437	4782	5428	32	32.92	30.39	36.55	32.25	72.78	56.89	68.6	65.44	65.05	32.822	65.752	1.00237	2.08281e-39	2.92761e-38	Cyp6a13	Cytochrome P450 6a9 [Lucilia cuprina]	-	-	-	-	-	GO:0005488//binding	-
LOC105223832	136	169	147	188	137	668	669	474	417	675	2.11	3.1	2.28	3.34	2.49	13.14	9.77	10.39	8.09	11.47	2.664	10.572	1.98858	2.14455e-39	3.01055e-38	ICA	PREDICTED: transferrin [Bactrocera dorsalis]	-	-	-	-	-	GO:0046915//transition metal ion transmembrane transporter activity	-
LOC105231623	257	258	232	207	167	573	783	487	587	520	8.91	10.75	8	8.19	6.73	25.25	25.41	23.79	25.43	20	8.516	23.976	1.49334	2.57769e-39	3.60484e-38	--	GL12078 [Drosophila persimilis]	-	-	-	-	-	GO:0004175//endopeptidase activity	GO:0019538//protein metabolic process
LOC105230858	667	722	819	652	802	236	294	188	201	263	18	22.97	22.08	20.07	25.26	8.03	7.35	7.14	6.72	7.79	21.676	7.406	-1.54933	2.78498e-39	3.88981e-38	far1	PREDICTED: putative fatty acyl-CoA reductase CG5065 [Bactrocera dorsalis]	Cellular Processes;Organismal Systems;Metabolism	Transport and catabolism;Aging;Lipid metabolism	ko04146//Peroxisome;ko04212//Longevity regulating pathway - worm;ko00073//Cutin, suberine and wax biosynthesis	K13356;K13356;K13356	-	GO:0016620//oxidoreductase activity, acting on the aldehyde or oxo group of donors, NAD or NADP as acceptor	-
LOC105222228	1233	997	1152	1076	952	1835	2503	1593	2315	2856	36.86	35.26	34.42	36.8	33.3	69.56	70.48	67.33	86.6	93.56	35.328	77.506	1.1335	3.14586e-39	4.38276e-38	Zmpste24	PREDICTED: CAAX prenyl protease 1 homolog [Bactrocera dorsalis]	Metabolism	Metabolism of terpenoids and polyketides	ko00900//Terpenoid backbone biosynthesis	K06013	-	GO:0016787//hydrolase activity	GO:0016485//protein processing
LOC105230755	579	494	606	466	466	850	1176	746	957	1252	9.52	9.62	9.96	8.77	8.97	17.72	18.22	17.35	19.7	22.58	9.368	19.114	1.02882	3.78528e-39	5.26029e-38	Slc9a8	PREDICTED: sodium/hydrogen exchanger 8 [Bactrocera dorsalis]	-	-	-	-	GO:0031224//intrinsic component of membrane	GO:0005451//monovalent cation:proton antiporter activity	GO:0006814//sodium ion transport;GO:0015992//proton transport;GO:0044763//single-organism cellular process;GO:0055067//monovalent inorganic cation homeostasis
LOC105232704	445	393	463	451	331	716	964	673	732	792	8.12	8.48	8.44	9.41	7.07	16.57	16.57	17.36	16.71	15.84	8.304	16.61	1.00017	3.87057e-39	5.37205e-38	LARS2	PREDICTED: probable leucine--tRNA ligase, mitochondrial [Bactrocera dorsalis]	Genetic Information Processing	Translation	ko00970//Aminoacyl-tRNA biosynthesis	K01869	-	GO:0004812//aminoacyl-tRNA ligase activity;GO:0032550//purine ribonucleoside binding;GO:0052689//carboxylic ester hydrolase activity	GO:0006418//tRNA aminoacylation for protein translation;GO:0006448//regulation of translational elongation
LOC105233874	13	5	1	8	5	219	224	71	197	290	0.57	0.26	0.04	0.4	0.26	12.24	9.3	4.42	10.87	14.01	0.306	10.168	5.05436	4.07012e-39	5.64192e-38	LCP22	PREDICTED: endocuticle structural glycoprotein ABD-4 [Bactrocera dorsalis]	-	-	-	-	-	-	-
LOC105233290	18	40	38	50	32	245	292	171	202	209	0.19	0.5	0.4	0.61	0.4	3.26	2.9	2.56	2.67	2.42	0.42	2.762	2.71725	4.33904e-39	6.00715e-38	--	PREDICTED: trithorax group protein osa isoform X1 [Bactrocera dorsalis]	-	-	-	-	-	-	-
LOC105226673	370	325	329	315	272	546	801	533	562	595	6.88	7.13	6.15	6.52	5.88	12.94	14.08	13.83	13.09	12.04	6.512	13.196	1.01893	4.4822e-39	6.19757e-38	slc30a9	PREDICTED: zinc transporter 9 [Bactrocera dorsalis]	-	-	-	-	-	-	-
LOC105229144	418	335	349	337	350	585	840	562	761	806	21.27	20.17	17.75	19.62	20.84	37.75	40.26	40.43	48.46	44.95	19.93	42.37	1.0881	4.99929e-39	6.89527e-38	tmem208	PREDICTED: transmembrane protein 208 [Bactrocera dorsalis]	-	-	-	-	-	-	-
LOC105223033	533	523	529	478	480	964	1068	807	944	1025	11.77	13.67	11.68	12.08	12.41	27.01	22.22	25.21	26.1	24.82	12.322	25.072	1.02484	5.54401e-39	7.63703e-38	Slc17a5	PREDICTED: sialin [Bactrocera dorsalis]	Cellular Processes	Transport and catabolism	ko04142//Lysosome	K12301	GO:0031224//intrinsic component of membrane	-	GO:0044763//single-organism cellular process
LOC105224154	115	107	95	109	97	577	522	238	424	504	4.5	4.92	3.73	4.88	4.44	28.58	19.2	13.11	20.73	21.58	4.494	20.64	2.19937	6.33061e-39	8.69888e-38	SG1	PREDICTED: LOW QUALITY PROTEIN: acetylcholinesterase-like [Bactrocera dorsalis]	-	-	-	-	-	-	-
LOC105232772	321	277	333	301	237	88	124	64	83	80	2.72	2.79	2.83	2.93	2.36	0.95	0.99	0.77	0.88	0.75	2.726	0.868	-1.65102	7.24239e-39	9.93937e-38	bab2	PREDICTED: protein bric-a-brac 2 isoform X1 [Bactrocera dorsalis]	-	-	-	-	GO:0010369//chromocenter;GO:0043231//intracellular membrane-bounded organelle	GO:0043565//sequence-specific DNA binding	GO:0008585//female gonad development;GO:0034645//cellular macromolecule biosynthetic process;GO:0035114//imaginal disc-derived appendage morphogenesis
LOC105233361	762	693	799	727	636	293	369	251	323	361	24.81	26.7	26	27.08	24.23	12.1	11.32	11.55	13.16	12.88	25.764	12.202	-1.07824	7.39935e-39	1.01422e-37	SRSF7	PREDICTED: serine/arginine-rich splicing factor 3 [Bactrocera dorsalis]	Genetic Information Processing;Human Diseases	Transcription;Infectious diseases	ko03040//Spliceosome;ko05168//Herpes simplex infection	K12896;K12896	GO:0005681//spliceosomal complex	GO:0003723//RNA binding;GO:0046914//transition metal ion binding	GO:0000377//RNA splicing, via transesterification reactions with bulged adenosine as nucleophile
LOC105230420	1587	1371	1363	1381	1169	2610	3385	2188	3430	3891	76.45	78.15	65.62	76.11	65.89	159.44	153.6	149.02	206.78	205.42	72.444	174.852	1.2712	9.90225e-39	1.35392e-37	v1g194562	PREDICTED: transmembrane emp24 domain-containing protein 2 [Bactrocera dorsalis]	-	-	-	-	GO:0031224//intrinsic component of membrane;GO:0044464//cell part	-	GO:0007444//imaginal disc development;GO:0016192//vesicle-mediated transport;GO:0030177//positive regulation of Wnt signaling pathway;GO:0046662//regulation of oviposition;GO:0070861//regulation of protein exit from endoplasmic reticulum
LOC105222372	696	603	701	557	531	224	316	153	227	286	13.2	13.53	13.29	12.11	11.81	5.39	5.64	4.1	5.39	5.94	12.788	5.292	-1.27291	1.3454e-38	1.83727e-37	pes	PREDICTED: protein peste [Bactrocera dorsalis]	-	-	-	-	GO:0016020//membrane	-	-
LOC105232029	156	119	152	134	124	296	418	211	324	319	5.17	4.66	5.03	5.08	4.81	12.43	13.04	9.88	13.43	11.58	4.95	12.072	1.28616	1.3565e-38	1.85014e-37	Gnb5	PREDICTED: guanine nucleotide-binding protein subunit beta-5 [Bactrocera dorsalis]	Human Diseases;Environmental Information Processing;Environmental Information Processing;Organismal Systems;Human Diseases;Organismal Systems;Organismal Systems;Human Diseases;Environmental Information Processing;Organismal Systems;Organismal Systems;Human Diseases;Organismal Systems;Organismal Systems;Organismal Systems;Organismal Systems;Human Diseases	Cancers;Signal transduction;Signal transduction;Nervous system;Infectious diseases;Nervous system;Endocrine system;Infectious diseases;Signal transduction;Immune system;Nervous system;Substance dependence;Environmental adaptation;Nervous system;Nervous system;Nervous system;Substance dependence	ko05200//Pathways in cancer;ko04151//PI3K-Akt signaling pathway;ko04014//Ras signaling pathway;ko04723//Retrograde endocannabinoid signaling;ko05163//Human cytomegalovirus infection;ko04728//Dopaminergic synapse;ko04926//Relaxin signaling pathway;ko05167//Kaposi sarcoma-associated herpesvirus infection;ko04371//Apelin signaling pathway;ko04062//Chemokine signaling pathway;ko04725//Cholinergic syn…	K04539;K04539;K04539;K04539;K04539;K04539;K04539;K04539;K04539;K04539;K04539;K04539;K04539;K04539;K04539;K04539;K04539	GO:0043234//protein complex	-	GO:0007166//cell surface receptor signaling pathway
LOC105230631	715	593	582	586	556	153	303	173	219	229	23.82	23.38	19.38	22.33	21.67	6.47	9.51	8.15	9.13	8.37	22.116	8.326	-1.4094	1.53386e-38	2.08946e-37	Adf1	PREDICTED: transcription factor Adf-1-like isoform X1 [Bactrocera dorsalis]	-	-	-	-	-	-	-
LOC105231715	493	386	560	464	457	136	203	73	121	138	5.19	4.8	5.89	5.58	5.62	1.81	2.01	1.09	1.59	1.59	5.416	1.618	-1.74302	1.76551e-38	2.40205e-37	disp	PREDICTED: protein dispatched [Bactrocera dorsalis]	-	-	-	-	GO:0016020//membrane	-	-
LOC105227733	2798	2779	3216	2821	2436	5890	6200	4907	4844	5889	157.13	184.9	180.62	181.24	160.14	420.86	329.76	390.48	341.66	363.41	172.806	369.234	1.09538	1.92192e-38	2.61164e-37	l(2)efl	PREDICTED: protein lethal(2)essential for life [Bactrocera dorsalis]	Genetic Information Processing;Organismal Systems	Folding, sorting and degradation;Aging	ko04141//Protein processing in endoplasmic reticulum;ko04213//Longevity regulating pathway - multiple species	K09542;K09542	-	-	-
LOC105228003	1162	963	1154	981	889	423	706	370	442	496	19.62	19.01	19.07	18.96	17.26	8.96	11.02	8.73	9.19	9.01	18.784	9.382	-1.00154	2.4372e-38	3.29964e-37	ESRRB	PREDICTED: steroid hormone receptor ERR1 [Bactrocera dorsalis]	-	-	-	-	GO:0043231//intracellular membrane-bounded organelle	GO:0001071//nucleic acid binding transcription factor activity;GO:0003677//DNA binding;GO:0008289//lipid binding;GO:0038023//signaling receptor activity;GO:0046914//transition metal ion binding	GO:0009755//hormone-mediated signaling pathway;GO:0010468//regulation of gene expression;GO:0034645//cellular macromolecule biosynthetic process
LOC105224194	1	0	1	1	2	267	609	225	816	960	0.04	0	0.04	0.04	0.08	11.96	20.26	11.23	36.06	37.16	0.04	23.334	9.18822	2.87328e-38	3.88527e-37	Lip1	PREDICTED: lipase 1 [Bactrocera dorsalis]	Cellular Processes;Organismal Systems;Metabolism	Transport and catabolism;Digestive system;Lipid metabolism	ko04142//Lysosome;ko04979//Cholesterol metabolism;ko00100//Steroid biosynthesis	K01052;K01052;K01052	-	GO:0003824//catalytic activity	-
LOC105231564	60	49	57	52	38	163	192	132	172	175	6.22	6.02	5.91	6.17	4.61	21.45	18.76	19.36	22.33	19.9	5.786	20.36	1.8151	3.49405e-38	4.70736e-37	Acyp	PREDICTED: acylphosphatase-2 [Bactrocera dorsalis]	Metabolism	Carbohydrate metabolism	ko00620//Pyruvate metabolism	K01512	-	-	-
LOC105227863	826	965	1064	789	913	42	20	41	12	43	33.04	45.68	42.54	36.11	42.74	2.13	0.75	2.32	0.6	1.89	40.022	1.538	-4.70167	4.01694e-38	5.39865e-37	--	PREDICTED: enolase-phosphatase E1 [Bactrocera cucurbitae]	-	-	-	-	-	-	-
LOC105234091	225	175	247	196	222	396	542	344	412	426	9.74	8.96	10.69	9.71	11.24	21.74	22.1	21.05	22.32	20.21	10.068	21.484	1.09349	4.58793e-38	6.15106e-37	CG2145	PREDICTED: poly(U)-specific endoribonuclease homolog [Bactrocera dorsalis]	-	-	-	-	-	GO:0016787//hydrolase activity	-
LOC105225494	845	544	729	577	610	179	317	165	178	268	12.81	9.76	11.05	10.01	10.82	3.44	4.53	3.54	3.38	4.45	10.89	3.868	-1.49334	5.36645e-38	7.17738e-37	--	PREDICTED: WD repeat-containing protein 6 [Bactrocera dorsalis]	-	-	-	-	-	-	-
LOC105227910	15	21	18	21	11	110	126	103	108	110	0.22	0.37	0.27	0.35	0.19	2.06	1.75	2.15	1.99	1.78	0.28	1.946	2.79701	6.23322e-38	8.32656e-37	in	PREDICTED: protein inturned [Bactrocera dorsalis]	-	-	-	-	-	-	-
LOC105231061	413	379	433	326	366	100	166	103	135	147	11.41	12.39	11.95	10.3	11.83	3.5	4.32	4.02	4.67	4.45	11.576	4.192	-1.46543	6.39423e-38	8.53131e-37	Coq2	PREDICTED: 4-hydroxybenzoate polyprenyltransferase, mitochondrial [Bactrocera dorsalis]	Metabolism;Metabolism	Global and overview maps;Metabolism of cofactors and vitamins	ko01100//Metabolic pathways;ko00130//Ubiquinone and other terpenoid-quinone biosynthesis	K06125;K06125	GO:0019866//organelle inner membrane;GO:0031224//intrinsic component of membrane;GO:0044451//nucleoplasm part;GO:0044452//nucleolar part	GO:0034062//RNA polymerase activity	GO:0006351//transcription, DNA-templated;GO:0006743//ubiquinone metabolic process;GO:0007169//transmembrane receptor protein tyrosine kinase signaling pathway;GO:0009620//response to fungus;GO:0010259//multicellular organism aging;GO:0042742//defense response to bacterium
LOC105233490	236	206	271	178	185	538	559	404	499	538	9.03	9.33	10.37	7.8	8.29	26.12	20.16	21.87	23.91	22.57	8.964	22.926	1.35477	7.61603e-38	1.01492e-36	--	PREDICTED: integumentary mucin C.1 [Bactrocera dorsalis]	-	-	-	-	-	-	-
LOC105230946	23	19	15	34	20	150	161	96	142	140	1.75	1.71	1.14	2.96	1.78	14.47	11.54	10.33	13.52	11.67	1.868	12.306	2.7198	8.73898e-38	1.16176e-36	--	GM24413 [Drosophila sechellia]	-	-	-	-	-	-	-
LOC105230011	884	696	848	784	724	1564	2037	1312	2077	2565	85.4	79.56	81.88	86.65	81.84	191.61	185.37	179.21	251.11	271.57	83.066	215.774	1.37719	8.83455e-38	1.17305e-36	Spase22-23	PREDICTED: signal peptidase complex subunit 3 [Bactrocera dorsalis]	Genetic Information Processing	Folding, sorting and degradation	ko03060//Protein export	K12948	GO:0031224//intrinsic component of membrane	GO:0016787//hydrolase activity	GO:0016485//protein processing
LOC105223357	1	0	0	3	1	748	1317	555	2130	2590	0.08	0	0	0.29	0.1	79.04	103.37	65.38	222.11	236.51	0.094	141.282	10.5536	8.96543e-38	1.189e-36	--	PREDICTED: snaclec convulxin subunit beta-like [Bactrocera dorsalis]	-	-	-	-	-	-	-
LOC105224270	668	574	714	547	591	225	346	220	263	265	15.91	16.18	17	14.96	16.46	6.86	7.76	7.43	7.86	6.92	16.102	7.366	-1.12829	1.05149e-37	1.39114e-36	PRPF3	PREDICTED: U4/U6 small nuclear ribonucleoprotein Prp3 isoform X1 [Bactrocera dorsalis]	Genetic Information Processing	Transcription	ko03040//Spliceosome	K12843	GO:0044423//virion part;GO:0097525//spliceosomal snRNP complex	-	-
LOC105224920	700	704	746	666	623	1338	1922	1036	1809	1987	25.59	30.66	27.38	27.96	26.82	62.32	66.3	53.69	83.03	79.81	27.682	69.03	1.31828	1.22899e-37	1.62403e-36	--	GH12330 [Drosophila grimshawi]	-	-	-	-	-	GO:0016740//transferase activity	-
LOC105234084	385	243	322	323	296	63	123	70	75	67	27.41	20.47	22.91	26.31	24.66	5.69	8.25	7.05	6.68	5.23	24.352	6.58	-1.88788	1.23186e-37	1.62588e-36	CG15027	PREDICTED: translation machinery-associated protein 16 homolog [Bactrocera dorsalis]	-	-	-	-	-	-	-
LOC105223011	289	185	218	260	166	562	752	404	509	569	5.6	4.24	4.22	5.76	3.76	13.82	13.73	11.08	12.34	12.09	4.716	12.612	1.41916	1.2572e-37	1.65734e-36	yin	PREDICTED: peptide transporter family 1 isoform X1 [Bactrocera dorsalis]	Organismal Systems	Digestive system	ko04974//Protein digestion and absorption	K14206	-	-	-
LOC105225976	6955	5444	6298	7030	5648	19051	29933	15692	15586	13443	94.52	87.8	85.12	108.08	89.29	326.73	381.46	300.79	263.1	199.2	92.962	294.256	1.66236	1.33319e-37	1.75542e-36	Slc12a2	PREDICTED: bumetanide-sensitive sodium-(potassium)-chloride cotransporter [Bactrocera dorsalis]	Organismal Systems;Organismal Systems;Human Diseases	Digestive system;Digestive system;Infectious diseases	ko04972//Pancreatic secretion;ko04970//Salivary secretion;ko05110//Vibrio cholerae infection	K10951;K10951;K10951	GO:0031224//intrinsic component of membrane	GO:0015377//cation:chloride symporter activity;GO:0046943//carboxylic acid transmembrane transporter activity	GO:0006821//chloride transport;GO:0006865//amino acid transport;GO:0044763//single-organism cellular process
LOC105224131	501	597	685	629	515	1553	1676	1508	1367	1629	9.31	13.13	12.73	13.38	11.2	36.61	29.34	39.63	31.8	33.18	11.95	34.112	1.51327	1.36216e-37	1.79142e-36	SLC10A2	Ileal sodium/bile acid cotransporter [Bactrocera dorsalis]	-	-	-	-	-	-	-
LOC105230034	44	34	86	36	58	296	453	238	212	316	2.6	2.38	5.09	2.44	4.02	22.22	25.26	19.92	15.7	20.5	3.306	20.72	2.64787	1.53314e-37	2.01389e-36	rgn	Regucalcin [Bactrocera dorsalis]	-	-	-	-	-	-	-
LOC105233404	1094	812	883	855	786	364	450	333	377	413	8.78	7.71	7.08	7.85	7.38	3.7	3.4	3.78	3.78	3.63	7.76	3.658	-1.085	1.88278e-37	2.47023e-36	Urb1	Nucleolar pre-ribosomal-associated protein 1 [Ceratitis capitata]	-	-	-	-	-	-	-
LOC105226869	1819	1573	1826	1652	1533	337	833	294	363	486	71.27	72.93	71.51	74.05	70.28	16.75	30.75	16.29	17.8	20.87	72.008	20.492	-1.8131	2.14106e-37	2.80243e-36	--	GM15499 [Drosophila sechellia]	-	-	-	-	-	-	-
LOC105233771	737	446	528	471	480	67	181	49	75	90	13.14	9.41	9.41	9.6	10.01	1.51	3.04	1.23	1.67	1.76	10.314	1.842	-2.48526	2.32988e-37	3.04596e-36	l(3)07882	PREDICTED: nucleolar protein 14 homolog [Bactrocera dorsalis]	-	-	-	-	-	-	-
LOC105229750	846	709	774	847	730	1481	1890	1387	1288	1463	26.88	26.66	24.58	30.79	27.14	59.69	56.58	62.32	51.23	50.96	27.21	56.156	1.0453	2.89556e-37	3.77655e-36	sucg-1	PREDICTED: succinate--CoA ligase [GDP-forming] subunit beta, mitochondrial [Bactrocera dorsalis]	Metabolism;Metabolism;Metabolism;Metabolism	Global and overview maps;Global and overview maps;Carbohydrate metabolism;Carbohydrate metabolism	ko01100//Metabolic pathways;ko01200//Carbon metabolism;ko00020//Citrate cycle (TCA cycle);ko00640//Propanoate metabolism	K01900;K01900;K01900;K01900	GO:0043232//intracellular non-membrane-bounded organelle	GO:0004774//succinate-CoA ligase activity;GO:0032550//purine ribonucleoside binding	GO:0006101//citrate metabolic process
LOC105228184	745	546	645	660	531	169	328	188	190	253	26.29	22.8	22.75	26.65	21.93	7.56	10.9	9.38	8.39	9.79	24.084	9.204	-1.38774	4.26268e-37	5.5465e-36	CG7137	PREDICTED: ribosomal RNA-processing protein 8 [Bactrocera dorsalis]	-	-	-	-	-	-	GO:0008152//metabolic process
LOC105223524	8	9	13	13	2	491	1039	1038	3034	1324	0.35	0.47	0.57	0.66	0.1	27.56	43.31	64.95	168.03	64.22	0.43	73.614	7.4195	5.22589e-37	6.79181e-36	--	PREDICTED: uncharacterized protein LOC105223524 [Bactrocera dorsalis]	-	-	-	-	-	-	-
LOC105224880	325	346	429	338	347	656	1001	682	684	754	18.98	23.91	25.04	22.59	23.71	48.59	55.07	56.32	50	48.27	22.846	51.65	1.17683	6.35726e-37	8.22345e-36	se	Glutathione S-transferase omega-1 [Bactrocera dorsalis]	Metabolism;Metabolism	Metabolism of other amino acids;Metabolism of cofactors and vitamins	ko00480//Glutathione metabolism;ko00790//Folate biosynthesis	K00310;K00310	GO:0044424//intracellular part	GO:0003824//catalytic activity	-
LOC105232098	2614	2109	2370	2218	2072	856	1532	765	870	1205	31.74	30.3	28.76	30.81	29.44	13.18	17.52	13.13	13.22	16.03	30.21	14.616	-1.04748	7.39684e-37	9.557e-36	leng8	PREDICTED: leukocyte receptor cluster member 8 homolog [Bactrocera dorsalis]	-	-	-	-	-	-	-
LOC105228248	173	113	179	123	143	331	509	340	331	349	2.72	2	2.71	2.16	2.48	6.4	7.28	7.54	6.26	5.91	2.414	6.678	1.46799	1.15377e-36	1.48376e-35	Dagla	inactivation no afterpotential E, isoform E [Drosophila melanogaster]	Organismal Systems;Organismal Systems;Organismal Systems	Nervous system;Endocrine system;Sensory system	ko04723//Retrograde endocannabinoid signaling;ko04925//Aldosterone synthesis and secretion;ko04745//Phototransduction - fly	K13806;K13806;K13806	GO:0044424//intracellular part	GO:0004806//triglyceride lipase activity	GO:0006950//response to stress;GO:0007165//signal transduction
LOC105226569	1936	1432	1793	1434	1450	180	606	241	327	285	36.68	32.45	33.66	31.42	31.28	4.34	11.91	6.78	7.84	6.17	33.098	7.408	-2.15959	1.22634e-36	1.57526e-35	AKAP1	PREDICTED: A-kinase anchor protein 1, mitochondrial [Bactrocera dorsalis]	-	-	-	-	-	GO:0003676//nucleic acid binding;GO:0016772//transferase activity, transferring phosphorus-containing groups	GO:0006796//phosphate-containing compound metabolic process
LOC105225607	26	12	5	13	6	822	756	306	1160	555	1.44	0.79	0.28	0.83	0.39	57.84	39.52	24.01	80.56	33.75	0.746	47.136	5.98151	1.86876e-36	2.38381e-35	--	PREDICTED: glycine-rich cell wall structural protein 2-like isoform X2 [Bactrocera dorsalis]	-	-	-	-	-	-	-
LOC105229475	11686	9313	10438	9880	8979	19075	26525	16064	26501	33167	254.45	239.96	227.16	246.12	228.77	526.73	544.07	494.56	722.16	791.51	239.292	615.806	1.3637	2.12114e-36	2.70262e-35	Pdi	PREDICTED: protein disulfide-isomerase [Bactrocera dorsalis]	Genetic Information Processing	Folding, sorting and degradation	ko04141//Protein processing in endoplasmic reticulum	K09580	GO:0043231//intracellular membrane-bounded organelle	GO:0003824//catalytic activity	GO:0019725//cellular homeostasis;GO:0044267//cellular protein metabolic process
LOC105231401	638	429	578	621	586	973	1676	881	1078	1359	8.7	6.92	7.89	9.68	9.36	16.82	21.54	16.96	18.39	20.31	8.51	18.804	1.14381	2.24715e-36	2.85657e-35	Best3	PREDICTED: bestrophin homolog 1 isoform X2 [Bactrocera cucurbitae]	-	-	-	-	-	-	-
LOC105230908	828	685	805	776	679	1779	1775	1355	1285	1634	23.79	23.29	23.12	25.51	22.83	64.82	48.04	55.05	46.2	51.45	23.708	53.112	1.16366	2.39651e-36	3.04293e-35	selenbp1-a	PREDICTED: selenium-binding protein 1 [Bactrocera dorsalis]	-	-	-	-	-	-	-
LOC105234032	705	549	650	716	600	2078	2988	1317	2819	4235	51.15	47.13	47.13	59.43	50.93	191.19	204.21	135.1	255.96	336.75	51.154	224.642	2.13471	2.51748e-36	3.19286e-35	--	PREDICTED: kunitz-type U15-theraphotoxin-Hs1g-like [Bactrocera dorsalis]	-	-	-	-	-	-	-
LOC105224695	1177	923	1130	1007	1091	364	656	366	388	517	20.79	19.3	19.65	20.06	22.25	8.06	10.58	8.61	8.61	9.69	20.41	9.11	-1.16375	2.53648e-36	3.21326e-35	--	PREDICTED: polyadenylate-binding protein-interacting protein 1 [Bactrocera dorsalis]	Genetic Information Processing	Translation	ko03013//RNA transport	K14322	-	-	-
LOC105222661	1356	1031	1109	1018	983	416	670	343	492	553	26.6	23.6	21.44	22.52	22.82	9.89	12	9.08	11.52	11.55	23.396	10.808	-1.11416	2.622e-36	3.31779e-35	CoRest	PREDICTED: REST corepressor isoform X1 [Bactrocera dorsalis]	-	-	-	-	-	-	-
LOC105233232	428	382	472	401	391	124	184	114	150	194	11.21	11.84	12.36	12.02	11.98	4.12	4.54	4.22	4.92	5.57	11.882	4.674	-1.34605	2.78229e-36	3.51658e-35	-	-	-	-	-	-	-	-	-
LOC105227683	540	585	582	461	539	153	260	112	141	166	9.68	12.42	10.43	9.48	11.34	3.49	4.39	2.84	3.16	3.26	10.67	3.428	-1.63812	3.47534e-36	4.3775e-35	Rybp	PREDICTED: YY1-associated factor 2 [Bactrocera dorsalis]	-	-	-	-	GO:0044451//nucleoplasm part	GO:0003676//nucleic acid binding	GO:0002683//negative regulation of immune system process;GO:0042981//regulation of apoptotic process;GO:0043161//proteasome-mediated ubiquitin-dependent protein catabolic process
LOC105222933	151	125	101	123	101	531	558	368	882	631	9.35	9.16	6.25	8.72	7.32	41.71	32.56	32.23	68.36	42.83	8.16	43.538	2.41563	4.34234e-36	5.45089e-35	--	PREDICTED: glycine-rich protein 5-like [Bactrocera dorsalis]	-	-	-	-	-	-	-
LOC105229646	1143	1000	811	1509	1056	4583	4181	3459	3956	3768	33.23	34.41	23.57	50.2	35.93	168.99	114.52	142.2	143.95	120.07	35.468	137.946	1.95951	6.02641e-36	7.51361e-35	-	-	-	-	-	-	-	-	-
LOC105227925	268	232	225	214	196	60	88	42	63	70	4.94	4.94	4.1	4.41	4.13	1.45	1.55	1.1	1.5	1.46	4.504	1.412	-1.67347	6.418e-36	7.9748e-35	SLC7A5	PREDICTED: Y+L amino acid transporter 2 [Bactrocera dorsalis]	-	-	-	-	GO:0031224//intrinsic component of membrane	GO:0046943//carboxylic acid transmembrane transporter activity	-
LOC105232493	772	702	513	666	538	1789	1751	1332	1665	1915	24.05	25.85	15.69	23.58	19.3	70.77	51.57	59.12	65.71	65.64	21.694	62.562	1.52799	6.89347e-36	8.55597e-35	--	gasp, isoform A [Drosophila melanogaster]	-	-	-	-	-	GO:0097367//carbohydrate derivative binding	GO:0006022//aminoglycan metabolic process
LOC105227408	1041	894	919	868	908	360	601	284	355	416	18.65	19	16.53	17.72	18.99	8.18	10.15	7.18	7.91	8.15	18.178	8.314	-1.12858	7.30475e-36	9.05625e-35	Zc3h18	PREDICTED: zinc finger CCCH domain-containing protein 18 [Bactrocera dorsalis]	-	-	-	-	-	-	-
LOC105233544	380	306	313	409	368	70	85	50	95	100	14.94	14.24	12.3	18.4	16.93	3.49	3.15	2.78	4.68	4.31	15.362	3.682	-2.0608	7.91574e-36	9.80272e-35	-	-	-	-	-	-	-	-	-
LOC105231570	307	228	262	234	236	557	699	548	719	974	19.01	16.71	16.22	16.58	17.1	43.75	40.78	47.99	55.73	66.11	17.124	50.872	1.57085	7.95659e-36	9.84227e-35	GA16263	PREDICTED: protein KRTCAP2 homolog [Bactrocera dorsalis]	-	-	-	-	-	-	-
LOC105224932	903	649	826	671	770	279	423	238	328	371	47.72	40.59	43.63	40.57	47.62	18.7	21.06	17.78	21.69	21.49	44.026	20.144	-1.12801	8.18765e-36	1.01167e-34	CACYBP	PREDICTED: calcyclin-binding protein [Bactrocera dorsalis]	Environmental Information Processing	Signal transduction	ko04310//Wnt signaling pathway	K04507	-	-	GO:0044767//single-organism developmental process
LOC105225520	787	554	607	594	552	48	188	65	87	132	25.81	21.5	19.9	22.29	21.18	2	5.81	3.01	3.57	4.74	22.136	3.826	-2.53249	8.58521e-36	1.05961e-34	CG1785	GH12434 [Drosophila grimshawi]	Human Diseases	Infectious diseases	ko05168//Herpes simplex infection	K14840	-	-	-
LOC105225038	117	79	92	93	88	313	374	260	456	584	7.05	5.54	5.22	6.42	5.8	23.49	21.19	21.53	33.2	37.34	6.006	27.35	2.18706	8.65644e-36	1.06721e-34	PRDX4	PREDICTED: peroxiredoxin-2 [Bactrocera dorsalis]	Cellular Processes	Cell growth and death	ko04214//Apoptosis - fly	K03386	-	GO:0003824//catalytic activity;GO:0016209//antioxidant activity	GO:0044710//single-organism metabolic process
LOC105233587	185	149	185	152	158	287	436	288	376	362	7.1	6.74	7.11	6.62	7.05	13.9	15.82	15.65	18.1	15.16	6.924	15.726	1.18347	9.28983e-36	1.14402e-34	clvs2	PREDICTED: clavesin-2 [Bactrocera dorsalis]	-	-	-	-	GO:0043231//intracellular membrane-bounded organelle;GO:0044444//cytoplasmic part	-	-
LOC105222265	293	288	297	285	291	64	97	50	88	105	7.73	9	7.83	8.6	8.99	2.14	2.41	1.87	2.9	3.04	8.43	2.472	-1.76985	9.40259e-36	1.15661e-34	TWNK	PREDICTED: twinkle protein, mitochondrial isoform X1 [Bactrocera dorsalis]	-	-	-	-	GO:0009295//nucleoid	GO:0003678//DNA helicase activity;GO:0043566//structure-specific DNA binding	GO:0006261//DNA-dependent DNA replication;GO:0032392//DNA geometric change
LOC105229834	3674	3030	3293	3165	2559	1077	1084	1043	948	1026	193.4	188.75	173.25	190.61	157.62	71.9	53.75	77.63	62.45	59.19	180.726	64.984	-1.47565	9.8459e-36	1.2098e-34	ADH	PREDICTED: alcohol dehydrogenase [Bactrocera dorsalis]	-	-	-	-	-	-	-
LOC105226456	501	473	516	468	490	928	1394	823	1357	1562	10.65	11.9	10.96	11.38	12.19	25.01	27.91	24.73	36.09	36.38	11.416	30.024	1.39506	9.91092e-36	1.21643e-34	Slc33a1	PREDICTED: acetyl-coenzyme A transporter 1 [Bactrocera dorsalis]	Metabolism;Metabolism	Global and overview maps;Glycan biosynthesis and metabolism	ko01100//Metabolic pathways;ko00604//Glycosphingolipid biosynthesis - ganglio series	K03372;K03372	GO:0031224//intrinsic component of membrane	-	GO:0015916//fatty-acyl-CoA transport
LOC105226108	166	175	132	152	179	454	643	299	435	596	6.73	8.4	5.35	7.05	8.49	23.35	24.56	17.14	22.08	26.49	7.204	22.724	1.65735	1.15108e-35	1.40966e-34	-	-	-	-	-	-	-	-	-
LOC105227556	1954	1620	1941	1844	1752	714	1262	664	741	818	24.46	23.86	24.29	26.32	25.63	11.55	14.98	11.94	11.89	11.28	24.912	12.328	-1.0149	1.16207e-35	1.42153e-34	BTBD3	PREDICTED: BTB/POZ domain-containing protein 6-B isoform X1 [Bactrocera dorsalis]	-	-	-	-	-	-	-
LOC105232016	1749	1425	1869	1600	1700	733	758	556	592	657	47.67	45.78	52.03	52.7	55.09	26.55	19.58	22.68	21.52	19.34	50.654	21.934	-1.20751	1.28499e-35	1.57016e-34	ABRA	PREDICTED: skin secretory protein xP2 isoform X1 [Bactrocera dorsalis]	-	-	-	-	-	-	-
LOC105228708	533	492	573	411	610	136	197	124	121	121	11.34	12.39	12.19	10.01	15.19	3.67	3.95	3.73	3.22	2.82	12.224	3.478	-1.81339	1.56577e-35	1.90903e-34	SLC6A9	PREDICTED: sodium- and chloride-dependent glycine transporter 1-like, partial [Rhagoletis zephyria]	-	-	-	-	GO:0031224//intrinsic component of membrane	GO:0015291//secondary active transmembrane transporter activity	GO:0044763//single-organism cellular process;GO:0044765//single-organism transport
LOC105234269	316	268	268	234	210	517	639	522	511	594	17.11	17.17	14.5	14.49	13.3	35.5	32.59	39.96	34.62	35.24	15.314	35.582	1.2163	1.74348e-35	2.12335e-34	cuta	PREDICTED: protein CutA homolog [Bactrocera dorsalis]	-	-	-	-	-	-	-
LOC105233620	512	367	434	429	386	100	162	94	164	136	30.99	26.29	26.26	29.71	27.34	7.68	9.24	8.04	12.42	9.02	28.118	9.28	-1.5993	1.77601e-35	2.16058e-34	CG4038	PREDICTED: probable H/ACA ribonucleoprotein complex subunit 1 [Bactrocera dorsalis]	Genetic Information Processing	Translation	ko03008//Ribosome biogenesis in eukaryotes	K11128	GO:0030529//intracellular ribonucleoprotein complex;GO:0044452//nucleolar part	GO:0003723//RNA binding	GO:0000154//rRNA modification;GO:0030154//cell differentiation;GO:0033554//cellular response to stress
LOC105225951	72	74	84	59	75	204	271	190	168	228	0.67	0.82	0.79	0.63	0.84	2.34	2.34	2.56	1.97	2.27	0.75	2.296	1.61416	2.07489e-35	2.5214e-34	ABTB2	PREDICTED: ankyrin repeat and BTB/POZ domain-containing protein 2 isoform X1 [Bactrocera dorsalis]	-	-	-	-	-	-	-
LOC105229988	1738	1381	1669	1301	1379	340	816	356	440	496	24.54	23.08	23.55	21.02	22.79	6.09	10.85	7.11	7.78	7.67	22.996	7.9	-1.54146	2.4547e-35	2.97642e-34	CUL4B	PREDICTED: cullin-4A [Bactrocera dorsalis]	Genetic Information Processing;Genetic Information Processing	Folding, sorting and degradation;Replication and repair	ko04120//Ubiquitin mediated proteolysis;ko03420//Nucleotide excision repair	K10609;K10609	GO:0000151//ubiquitin ligase complex	GO:0044389//ubiquitin-like protein ligase binding	-
LOC105225694	149	167	177	177	159	1423	2372	943	3440	3712	14.06	18.65	16.7	19.11	17.56	170.32	210.89	125.84	406.32	383.97	17.216	259.468	3.91373	2.45472e-35	2.97642e-34	--	PREDICTED: uncharacterized protein LOC105225694 isoform X1 [Bactrocera dorsalis]	-	-	-	-	-	-	-
LOC105233886	9	13	14	20	12	187	140	170	113	137	0.86	1.47	1.33	2.18	1.34	22.62	12.58	22.93	13.49	14.32	1.436	17.188	3.58127	2.68255e-35	3.24198e-34	Cpr47Eg	PREDICTED: cuticular protein 47Eg-like [Bactrocera dorsalis]	-	-	-	-	-	-	-
LOC105227880	553	502	545	482	476	173	268	176	229	219	13.6	14.61	13.4	13.56	13.7	5.4	6.21	6.12	7.05	5.9	13.774	6.136	-1.16658	2.68739e-35	3.24427e-34	mfsd8	PREDICTED: major facilitator superfamily domain-containing protein 8 [Bactrocera dorsalis]	Cellular Processes	Transport and catabolism	ko04142//Lysosome	K12307	-	-	GO:0044763//single-organism cellular process
LOC105223183	356	301	366	352	337	36	91	30	81	79	12.04	12.04	12.37	13.62	13.33	1.54	2.9	1.43	3.43	2.93	12.68	2.446	-2.37406	2.7095e-35	3.26739e-34	Sas10	PREDICTED: LOW QUALITY PROTEIN: something about silencing protein 10 [Bactrocera dorsalis]	-	-	-	-	-	-	-
LOC105227695	371	358	402	348	389	124	135	112	105	121	10.98	12.54	11.9	11.79	13.48	4.66	3.77	4.69	3.89	3.93	12.138	4.188	-1.5352	2.86356e-35	3.4494e-34	--	GH20048 [Drosophila grimshawi]	-	-	-	-	-	GO:0005488//binding	GO:0006796//phosphate-containing compound metabolic process
LOC105225917	703	545	638	536	522	236	359	199	237	307	18.08	16.59	16.4	15.77	15.71	7.7	8.7	7.24	7.63	8.66	16.51	7.986	-1.0478	3.08865e-35	3.71648e-34	--	U3 small nucleolar RNA-associated protein 6-like protein [Bactrocera dorsalis]	Genetic Information Processing	Translation	ko03008//Ribosome biogenesis in eukaryotes	K14557	-	-	GO:0010467//gene expression;GO:0030154//cell differentiation;GO:0033554//cellular response to stress
LOC105225134	156	136	137	110	117	324	375	217	290	320	2.5	2.62	2.25	2.01	2.15	6.55	5.66	4.9	5.75	5.54	2.306	5.68	1.3005	3.60604e-35	4.32489e-34	--	PREDICTED: zinc finger CCCH domain-containing protein 18 isoform X3 [Bactrocera dorsalis]	-	-	-	-	-	-	-
LOC105232338	60	49	45	61	36	288	435	137	308	237	1.42	1.33	1.05	1.63	0.95	8.45	9.3	4.54	8.89	6.01	1.276	7.438	2.54329	3.86992e-35	4.63634e-34	nep-1	PREDICTED: membrane metallo-endopeptidase-like 1 [Bactrocera dorsalis]	-	-	-	-	-	-	-
LOC105224323	675	518	647	678	546	230	302	167	173	267	14.32	13	13.72	16.45	13.55	6.19	6.03	5.01	4.59	6.21	14.208	5.606	-1.34166	4.0392e-35	4.8339e-34	Cyp4g15	PREDICTED: cytochrome P450 4g15 [Bactrocera dorsalis]	-	-	-	-	-	GO:0016491//oxidoreductase activity;GO:0046906//tetrapyrrole binding;GO:0046914//transition metal ion binding	GO:0008202//steroid metabolic process
LOC105229414	598	488	553	514	463	225	304	205	211	239	17.41	16.81	16.09	17.12	15.77	8.31	8.34	8.44	7.69	7.62	16.64	8.08	-1.04223	4.28937e-35	5.12772e-34	GA19679	PREDICTED: threonylcarbamoyladenosine tRNA methylthiotransferase [Bactrocera dorsalis]	-	-	-	-	GO:0044464//cell part	GO:0003824//catalytic activity;GO:0051536//iron-sulfur cluster binding	GO:0016070//RNA metabolic process
LOC105232885	664	578	644	566	508	130	287	103	175	202	9.75	10.04	9.45	9.51	8.73	2.42	3.97	2.14	3.22	3.25	9.496	3	-1.66236	4.45864e-35	5.32431e-34	-	-	-	-	-	-	-	-	-
LOC105223169	380	277	347	360	335	526	843	507	673	783	3.68	3.18	3.36	3.99	3.8	6.47	7.7	6.95	8.16	8.32	3.602	7.52	1.06193	4.57004e-35	5.45144e-34	--	PREDICTED: mucin-5AC [Bactrocera dorsalis]	-	-	-	-	-	-	-
LOC105226078	43	27	31	24	29	119	205	111	219	189	1.21	0.9	0.87	0.77	0.95	4.25	5.43	4.42	7.71	5.83	0.94	5.528	2.55602	5.06209e-35	6.03187e-34	Snmp1	PREDICTED: sensory neuron membrane protein 1 [Bactrocera dorsalis]	-	-	-	-	-	-	-
LOC105224233	59	45	53	38	54	258	273	174	143	219	1.84	1.66	1.65	1.36	1.97	10.22	8.03	7.69	5.59	7.5	1.696	7.806	2.20245	5.32645e-35	6.3332e-34	--	PREDICTED: plasminogen receptor (KT) [Bactrocera dorsalis]	-	-	-	-	-	-	-
LOC105228876	144	104	130	141	126	640	620	346	327	485	4.79	4.07	4.3	5.31	4.91	26.98	19.44	16.28	13.62	17.69	4.676	18.802	2.00754	5.66319e-35	6.72633e-34	Spn42Dd	PREDICTED: serine protease inhibitor 42Dd [Bactrocera dorsalis]	-	-	-	-	-	-	-
LOC105229860	1509	1243	1551	1213	1197	436	813	340	410	483	37.53	36.58	38.56	34.52	34.84	13.75	19.05	11.96	12.76	13.17	36.406	14.138	-1.3646	6.59007e-35	7.8188e-34	PPP5C	PREDICTED: serine/threonine-protein phosphatase 5 [Bactrocera dorsalis]	Environmental Information Processing	Signal transduction	ko04010//MAPK signaling pathway	K04460	GO:0043231//intracellular membrane-bounded organelle	GO:0003824//catalytic activity	GO:0006464//cellular protein modification process
LOC105223292	6	0	1	0	1	586	958	443	1495	1844	0.63	0	0.11	0	0.12	78.63	95.48	66.27	197.96	213.83	0.172	130.434	9.5667	7.61051e-35	9.01012e-34	-	-	-	-	-	-	-	-	-
LOC105225479	404	326	362	403	349	782	831	612	659	763	10.14	9.69	9.08	11.58	10.25	24.9	19.65	21.72	20.71	20.99	10.148	21.594	1.08944	8.46173e-35	1.00072e-33	PNGase	Peptide-N(4)-(N-acetyl-beta-glucosaminyl)asparagine amidase [Bactrocera dorsalis]	Genetic Information Processing	Folding, sorting and degradation	ko04141//Protein processing in endoplasmic reticulum	K01456	GO:0043231//intracellular membrane-bounded organelle	-	GO:0006281//DNA repair;GO:0009100//glycoprotein metabolic process
LOC105224310	18	7	9	2	4	341	714	331	1062	1238	1.35	0.62	0.67	0.17	0.35	32.39	50.37	35.05	99.54	101.62	0.632	63.794	6.65735	9.11124e-35	1.07638e-33	--	PREDICTED: venom allergen 3-like [Bactrocera dorsalis]	-	-	-	-	-	-	-
MSTRG.784	468	409	448	445	416	137	238	105	168	182	10.29	10.64	9.85	11.19	10.7	3.82	4.93	3.26	4.62	4.39	10.534	4.204	-1.32522	9.54945e-35	1.12694e-33	--	zinc finger protein ush [Zeugodacus cucurbitae]	-	-	-	-	-	GO:0032550//purine ribonucleoside binding	-
LOC105231754	758	663	769	767	607	168	251	141	229	304	8.06	8.34	8.17	9.33	7.55	2.26	2.51	2.12	3.05	3.54	8.29	2.696	-1.62055	9.96007e-35	1.17414e-33	l(2)03659	PREDICTED: LOW QUALITY PROTEIN: probable multidrug resistance-associated protein lethal(2)03659 [Bactrocera dorsalis]	-	-	-	-	GO:0031224//intrinsic component of membrane	GO:0015405//P-P-bond-hydrolysis-driven transmembrane transporter activity;GO:0017111//nucleoside-triphosphatase activity;GO:0032550//purine ribonucleoside binding	GO:0044763//single-organism cellular process;GO:0051234//establishment of localization
LOC105225725	1040	1628	554	1405	1137	23	64	31	18	54	24.59	45.56	13.09	38.01	31.46	0.69	1.43	1.04	0.53	1.4	30.542	1.018	-4.90699	1.01874e-34	1.19966e-33	Lsp2	PREDICTED: larval serum protein 2 [Bactrocera dorsalis]	-	-	-	-	-	-	-
LOC105229694	392	328	383	290	369	112	152	88	125	120	10.15	10.05	9.91	8.59	11.18	3.68	3.71	3.22	4.05	3.4	9.976	3.612	-1.46566	1.06973e-34	1.25835e-33	--	GH21486 [Drosophila grimshawi]	-	-	-	-	-	-	-
LOC105224081	830	577	718	689	595	224	388	177	227	311	11.92	9.81	10.31	11.33	10.01	4.08	5.25	3.6	4.08	4.9	10.676	4.382	-1.28471	1.07436e-34	1.26246e-33	Mlxipl	PREDICTED: protein WBSCR14 homolog isoform X1 [Bactrocera latifrons]	Human Diseases;Human Diseases	Endocrine and metabolic diseases;Endocrine and metabolic diseases	ko04932//Non-alcoholic fatty liver disease (NAFLD);ko04931//Insulin resistance	K09113;K09113	-	-	-
LOC105224010	711	514	611	625	556	243	351	212	241	243	10.8	9.24	9.27	10.86	9.88	4.67	5.02	4.56	4.58	4.04	10.01	4.574	-1.12991	1.36392e-34	1.59931e-33	TTC27	PREDICTED: tetratricopeptide repeat protein 27 [Bactrocera dorsalis]	-	-	-	-	-	-	-
LOC105231562	651	529	659	558	546	234	386	210	236	263	15.79	15.22	15.93	15.49	15.53	7.26	8.85	7.21	7.18	7.01	15.592	7.502	-1.05546	1.47245e-34	1.72291e-33	--	PREDICTED: ubiquitin-associated protein 1 isoform X1 [Bactrocera dorsalis]	-	-	-	-	-	-	-
LOC105223205	447	386	461	434	398	78	203	91	107	139	7.16	7.3	7.38	7.95	7.36	1.58	3.06	2.06	2.13	2.44	7.43	2.254	-1.72087	2.0044e-34	2.33297e-33	Art4	PREDICTED: histone-arginine methyltransferase CARMER [Bactrocera dorsalis]	Human Diseases	Drug resistance	ko01522//Endocrine resistance	K05931	GO:0034708//methyltransferase complex;GO:0043231//intracellular membrane-bounded organelle	GO:0016274//protein-arginine N-methyltransferase activity	GO:0016571//histone methylation;GO:0035247//peptidyl-arginine omega-N-methylation
LOC105226074	553	429	558	442	502	180	278	147	168	231	20.3	18.65	20.5	18.56	21.56	8.38	9.63	7.61	7.71	9.3	19.914	8.526	-1.22384	2.01435e-34	2.34207e-33	SMYD5	PREDICTED: SET and MYND domain-containing protein 5 [Bactrocera dorsalis]	-	-	-	-	-	-	-
LOC105223530	104	126	27	55	66	3515	4641	4542	15821	12205	9.82	14.07	2.55	5.94	7.29	420.72	412.62	606.12	1868.72	1262.49	7.934	914.134	6.84821	2.02772e-34	2.35515e-33	--	PREDICTED: uncharacterized protein LOC105223530 [Bactrocera dorsalis]	-	-	-	-	-	-	-
LOC105221837	543	487	575	546	472	121	228	98	107	205	13.21	14.02	13.98	15.2	13.44	3.73	5.22	3.37	3.26	5.47	13.97	4.21	-1.73044	2.15901e-34	2.50499e-33	NGDN	PREDICTED: neuroguidin [Bactrocera dorsalis]	-	-	-	-	GO:0031981//nuclear lumen	-	-
LOC105225612	843	805	888	792	762	234	470	267	274	365	34.68	39.18	36.55	37.28	36.68	12.22	18.22	15.55	14.12	16.46	36.874	15.314	-1.26775	2.17666e-34	2.52283e-33	akirin	PREDICTED: akirin [Bactrocera dorsalis]	-	-	-	-	-	-	-
LOC105227858	12	6	9	24	15	146	229	128	86	167	0.5	0.3	0.38	1.15	0.74	7.76	9.04	7.59	4.51	7.67	0.614	7.314	3.57435	2.756e-34	3.1876e-33	--	PREDICTED: myb-like protein M [Bactrocera dorsalis]	-	-	-	-	-	-	-
LOC105229548	726	610	659	587	562	264	408	207	280	293	15.31	15.16	13.64	13.82	13.43	5.42	7.73	5.49	5.81	5.76	14.272	6.042	-1.24009	3.62399e-34	4.17402e-33	ppp1r21	PREDICTED: protein phosphatase 1 regulatory subunit 21 isoform X2 [Bactrocera oleae]	-	-	-	-	-	-	-
LOC105225488	1908	1600	1809	1451	1562	644	1149	564	692	777	18.44	18.28	17.48	16.05	17.66	7.89	10.45	7.74	8.37	8.22	17.582	8.534	-1.04281	3.65922e-34	4.2102e-33	Upf1	Regulator of nonsense transcripts 1-like protein [Bactrocera dorsalis]	Genetic Information Processing;Genetic Information Processing	Translation;Translation	ko03013//RNA transport;ko03015//mRNA surveillance pathway	K14326;K14326	GO:0044424//intracellular part	GO:0003676//nucleic acid binding;GO:0017111//nucleoside-triphosphatase activity;GO:0032550//purine ribonucleoside binding;GO:0046914//transition metal ion binding	-
LOC105231919	2276	1456	2116	1685	1827	3129	5114	2921	2912	3544	13.39	10.14	12.44	11.34	12.58	23.35	28.35	24.3	21.44	22.85	11.978	24.058	1.00613	3.69723e-34	4.2495e-33	larp	PREDICTED: LOW QUALITY PROTEIN: la-related protein 1 [Bactrocera dorsalis]	-	-	-	-	-	-	-
LOC105233062	560	432	528	432	419	126	254	100	132	139	6.88	6.28	6.49	6.08	6.03	1.96	2.94	1.74	2.03	1.87	6.352	2.108	-1.59134	4.90076e-34	5.61527e-33	unc-5	PREDICTED: netrin receptor unc-5 [Bactrocera dorsalis]	-	-	-	-	-	-	-
LOC105229150	1196	996	1194	885	1012	431	657	398	456	463	27.81	27.41	27.75	23.55	27.54	12.71	14.39	13.09	13.27	11.8	26.812	13.052	-1.03861	5.45138e-34	6.23321e-33	--	PREDICTED: hyccin [Bactrocera dorsalis]	-	-	-	-	-	-	-
LOC105223117	663	571	688	688	690	243	267	171	159	254	10.04	9.72	10.45	12.02	11.97	4.43	3.65	3.84	2.92	4.4	10.84	3.848	-1.49418	5.68149e-34	6.4896e-33	serac1	PREDICTED: protein SERAC1 isoform X1 [Bactrocera dorsalis]	-	-	-	-	-	GO:0016787//hydrolase activity	GO:0015031//protein transport
LOC105222035	306	182	240	205	195	439	635	409	405	487	2.05	1.44	1.61	1.55	1.5	3.71	4.04	3.83	3.35	3.58	1.63	3.702	1.18343	6.05375e-34	6.90052e-33	--	PREDICTED: uncharacterized protein LOC105222035 isoform X1 [Bactrocera dorsalis]	-	-	-	-	-	-	-
P	223	183	168	151	161	1012	1685	940	2436	2730	2.66	2.61	1.98	2.1	2.24	15.01	18.69	15.9	35.04	34.8	2.318	23.888	3.36533	7.11296e-34	8.09953e-33	Oca2	PREDICTED: P protein isoform X1 [Bactrocera cucurbitae]	-	-	-	-	-	-	GO:0044763//single-organism cellular process
LOC105224783	249	166	219	211	228	380	548	328	405	425	6.39	5	5.72	6.17	7.12	12.38	13.33	11.94	12.82	12.03	6.08	12.5	1.03978	7.53821e-34	8.5749e-33	--	PREDICTED: uncharacterized protein LOC105224783 isoform X1 [Bactrocera dorsalis]	-	-	-	-	-	-	-
LOC105225001	989	770	1069	845	827	366	586	296	384	468	14.59	13.44	15.76	14.26	14.28	6.85	8.15	6.18	7.09	7.57	14.466	7.168	-1.01302	7.59964e-34	8.63588e-33	CG9801	PREDICTED: PP2C-like domain-containing protein CG9801 [Bactrocera dorsalis]	-	-	-	-	-	-	-
LOC105231230	61	43	68	68	42	206	238	158	148	235	1.67	1.39	1.86	2.13	1.34	7.14	6.12	6.1	5.06	7.04	1.678	6.292	1.90678	8.09398e-34	9.18817e-33	HSDL1	PREDICTED: inactive hydroxysteroid dehydrogenase-like protein 1 [Bactrocera dorsalis]	Metabolism;Metabolism;Metabolism;Metabolism;Metabolism	Global and overview maps;Global and overview maps;Lipid metabolism;Lipid metabolism;Lipid metabolism	ko01100//Metabolic pathways;ko01212//Fatty acid metabolism;ko00140//Steroid hormone biosynthesis;ko01040//Biosynthesis of unsaturated fatty acids;ko00062//Fatty acid elongation	K10251;K10251;K10251;K10251;K10251	-	GO:0003824//catalytic activity	GO:0044710//single-organism metabolic process
LOC105233949	137	118	158	123	112	22	35	19	20	23	2.06	2.1	2.37	2.11	1.97	0.42	0.5	0.4	0.38	0.38	2.122	0.416	-2.35077	9.29755e-34	1.05112e-32	Rchy1	PREDICTED: probable serine/threonine-protein kinase cdc7 [Bactrocera dorsalis]	Genetic Information Processing;Human Diseases;Cellular Processes	Folding, sorting and degradation;Infectious diseases;Cell growth and death	ko04120//Ubiquitin mediated proteolysis;ko05162//Measles;ko04115//p53 signaling pathway	K10144;K10144;K10144	-	GO:0043169//cation binding	-
LOC105229334	3835	2902	3544	2852	3151	986	1974	837	927	1224	50.59	46.2	47.11	43.24	49.85	15.31	23.9	14.97	14.77	17.31	47.398	17.252	-1.45806	9.62109e-34	1.08658e-32	dl	PREDICTED: embryonic polarity protein dorsal isoform X3 [Bactrocera dorsalis]	Human Diseases;Organismal Systems;Environmental Information Processing;Human Diseases	Cancers;Immune system;Signal transduction;Cancers	ko05203//Viral carcinogenesis;ko04624//Toll and Imd signaling pathway;ko04014//Ras signaling pathway;ko05202//Transcriptional misregulation in cancers	K09254;K09254;K09254;K09254	-	-	-
LOC105227102	262	263	291	275	243	84	84	66	78	69	11.53	13.69	12.8	13.84	12.51	4.69	3.48	4.11	4.29	3.33	12.874	3.98	-1.69362	1.03644e-33	1.16933e-32	Trmt61a	PREDICTED: tRNA (adenine(58)-N(1))-methyltransferase catalytic subunit TRMT61A [Bactrocera dorsalis]	-	-	-	-	GO:0043527//tRNA methyltransferase complex	GO:0016426//tRNA (adenine) methyltransferase activity	GO:0001510//RNA methylation
LOC105230542	562	465	456	461	416	48	92	44	120	105	14.39	14.14	11.77	13.52	12.51	1.53	2.22	1.63	3.87	2.98	13.266	2.446	-2.43924	1.18534e-33	1.3346e-32	--	CG9896 [Drosophila busckii]	-	-	-	-	-	-	-
LOC105226590	736	617	632	648	643	289	382	208	283	332	28.78	28.99	24.67	28.51	29.31	14.54	14.2	11.5	13.36	14.05	28.052	13.53	-1.05194	1.3635e-33	1.53207e-32	Myg1	PREDICTED: UPF0160 protein isoform X1 [Bactrocera dorsalis]	-	-	-	-	-	-	-
MSTRG.11496	152	102	111	141	83	326	480	271	283	318	4.97	3.94	3.62	5.27	3.17	13.51	14.77	12.52	11.57	11.39	4.194	12.752	1.60432	1.38691e-33	1.55678e-32	Cyp12e1	PREDICTED: cytochrome P450 CYP12A2-like [Bactrocera latifrons]	-	-	-	-	GO:0043231//intracellular membrane-bounded organelle	GO:0016491//oxidoreductase activity;GO:0046872//metal ion binding;GO:0046906//tetrapyrrole binding	GO:0017085//response to insecticide;GO:0044710//single-organism metabolic process
Cg050	460	385	463	377	360	147	221	129	123	187	23.16	22.94	23.3	21.72	21.21	9.39	10.48	9.18	7.75	10.32	22.466	9.424	-1.25333	1.45916e-33	1.63621e-32	--	GH15004 [Drosophila grimshawi]	-	-	-	-	-	-	-
MSTRG.78	481	357	422	346	355	117	191	75	131	150	12.72	11.17	11.15	10.47	10.98	3.92	4.76	2.8	4.33	4.35	11.298	4.032	-1.4865	1.6229e-33	1.81797e-32	--	LIM domain and actin-binding protein 1 [Bactrocera dorsalis]	-	-	-	-	-	-	-
LOC105223944	465	353	440	478	411	892	1069	920	865	907	9.32	8.37	8.86	10.89	9.63	22.73	20.2	26.1	21.67	19.97	9.414	22.134	1.23338	1.84756e-33	2.06545e-32	h	PREDICTED: protein hairy isoform X1 [Bactrocera dorsalis]	-	-	-	-	-	-	GO:0010467//gene expression;GO:0034645//cellular macromolecule biosynthetic process
LOC105228086	239	230	209	238	230	45	53	51	56	67	2.15	2.45	1.96	2.45	2.52	0.51	0.52	0.74	0.63	0.66	2.306	0.612	-1.91379	1.86201e-33	2.07949e-32	otk	PREDICTED: tyrosine-protein kinase-like otk [Bactrocera dorsalis]	-	-	-	-	GO:0031224//intrinsic component of membrane	GO:0004672//protein kinase activity;GO:0032550//purine ribonucleoside binding	GO:0006468//protein phosphorylation
LOC105226592	944	844	1024	872	911	259	543	222	284	336	18.31	19.37	19.85	19.35	20.68	6.37	9.92	6.09	6.89	7.14	19.512	7.282	-1.42196	2.21381e-33	2.46989e-32	Rnf126	PREDICTED: E3 ubiquitin-protein ligase RNF126 [Bactrocera dorsalis]	-	-	-	-	-	-	-
LOC105229169	91	103	53	118	85	635	485	379	458	452	2.11	2.82	1.23	3.12	2.3	18.64	10.57	12.4	13.27	11.47	2.316	13.27	2.51846	2.64428e-33	2.94123e-32	CG5009	PREDICTED: probable peroxisomal acyl-coenzyme A oxidase 1 [Bactrocera dorsalis]	Metabolism;Cellular Processes;Environmental Information Processing;Metabolism;Metabolism;Organismal Systems;Metabolism;Metabolism	Global and overview maps;Transport and catabolism;Signal transduction;Global and overview maps;Lipid metabolism;Endocrine system;Lipid metabolism;Lipid metabolism	ko01100//Metabolic pathways;ko04146//Peroxisome;ko04024//cAMP signaling pathway;ko01212//Fatty acid metabolism;ko00071//Fatty acid degradation;ko03320//PPAR signaling pathway;ko01040//Biosynthesis of unsaturated fatty acids;ko00592//alpha-Linolenic acid metabolism	K00232;K00232;K00232;K00232;K00232;K00232;K00232;K00232	GO:0042579//microbody	GO:0000166//nucleotide binding;GO:0016634//oxidoreductase activity, acting on the CH-CH group of donors, oxygen as acceptor	GO:0009062//fatty acid catabolic process
LOC105232640	417	331	402	347	320	840	1088	636	1214	1404	40.8	38.32	39.31	38.84	36.64	104.23	100.28	87.99	148.66	150.56	38.782	118.344	1.60953	2.81964e-33	3.12997e-32	Spase12	PREDICTED: signal peptidase complex subunit 1 [Bactrocera dorsalis]	Genetic Information Processing	Folding, sorting and degradation	ko03060//Protein export	K12946	GO:0031224//intrinsic component of membrane	GO:0016787//hydrolase activity	GO:0016485//protein processing
LOC105226864	561	438	487	486	443	142	253	155	200	221	15.6	13.59	13.53	15.32	14.13	5.09	6.67	5.89	7.11	6.53	14.434	6.258	-1.2057	2.85718e-33	3.16845e-32	ken	PREDICTED: transcription factor Ken isoform X2 [Bactrocera dorsalis]	-	-	-	-	-	-	-
LOC115066443	647	506	699	590	519	1200	1350	1038	922	1361	7.86	7.27	8.48	8.2	7.37	18.48	15.44	17.82	14.01	18.11	7.836	16.772	1.09787	3.17801e-33	3.5207e-32	fry	PREDICTED: LOW QUALITY PROTEIN: protein furry [Bactrocera dorsalis]	-	-	-	-	-	-	-
LOC105226535	1781	1382	1489	1329	1467	564	938	411	515	602	23.47	23.55	20.14	21.54	22.87	10.39	12.99	7.92	9.94	9.3	22.314	10.108	-1.14245	3.23708e-33	3.58254e-32	tacc3	PREDICTED: transforming acidic coiled-coil-containing protein 2 isoform X1 [Bactrocera dorsalis]	Genetic Information Processing	Translation	ko03013//RNA transport	K14283	-	-	-
LOC105224967	243	154	214	191	168	43	57	48	44	51	17.03	12.77	14.99	15.31	13.77	3.82	3.76	4.76	3.86	3.92	14.774	4.024	-1.87636	3.96952e-33	4.38435e-32	--	GM11471 [Drosophila sechellia]	-	-	-	-	-	-	-
LOC105227033	1930	1614	1978	1888	1668	691	1247	664	766	792	63.49	62.83	65.03	71.05	64.2	28.83	38.64	30.88	31.54	28.55	65.32	31.688	-1.04359	4.53763e-33	5.00682e-32	Muted	PREDICTED: biogenesis of lysosome-related organelles complex 1 subunit 5 [Bactrocera dorsalis]	-	-	-	-	-	-	-
LOC105230169	12	23	25	15	10	106	134	99	90	112	0.17	0.39	0.34	0.24	0.17	1.89	1.78	1.98	1.58	1.73	0.262	1.792	2.77393	4.63901e-33	5.11357e-32	Sobp	Sine oculis-binding protein-like protein [Bactrocera dorsalis]	-	-	-	-	GO:0043231//intracellular membrane-bounded organelle	GO:0003676//nucleic acid binding;GO:0043169//cation binding	-
LOC105224858	37	28	34	33	26	220	218	98	130	163	1.35	1.21	1.24	1.37	1.11	10.16	7.47	5.04	5.92	6.5	1.256	7.018	2.48222	5.16268e-33	5.68513e-32	-	-	-	-	-	-	-	-	-
LOC105230590	1971	1692	1896	1777	1552	643	796	481	530	931	70.31	71.5	67.64	72.68	64.77	28.83	26.07	24.08	23.67	34.04	69.38	27.338	-1.34361	6.09605e-33	6.69958e-32	SLC2A1	Solute carrier family 2, facilitated glucose transporter member 1, partial [Bactrocera dorsalis]	-	-	-	-	GO:0016020//membrane	GO:0022857//transmembrane transporter activity	GO:0051234//establishment of localization
LOC105229361	642	480	669	552	542	220	359	189	217	279	5.5	4.83	5.73	5.4	5.42	2.36	2.88	2.28	2.32	2.61	5.376	2.49	-1.11039	6.43411e-33	7.06407e-32	SAMD11	PREDICTED: ras guanine nucleotide exchange factor Q [Bactrocera dorsalis]	-	-	-	-	-	-	-
LOC115065727	59	53	43	40	76	271	371	303	301	208	0.7	0.74	0.51	0.54	1.14	4.43	4.15	5.21	4.47	2.97	0.726	4.246	2.54806	7.16624e-33	7.86007e-32	-	-	-	-	-	-	-	-	-
LOC105224193	340	280	312	243	255	46	104	47	64	101	16.14	15.73	14.81	13.2	14.17	2.77	4.65	3.16	3.8	5.26	14.81	3.928	-1.9147	8.70251e-33	9.52614e-32	dbe	PREDICTED: KRR1 small subunit processome component homolog [Bactrocera dorsalis]	-	-	-	-	GO:0043232//intracellular non-membrane-bounded organelle	GO:0003676//nucleic acid binding	GO:0016072//rRNA metabolic process
LOC105222945	127	112	173	161	104	286	448	272	339	372	3.69	3.84	5.03	5.35	3.54	10.52	12.25	11.15	12.3	11.82	4.29	11.608	1.43607	1.07583e-32	1.17648e-31	--	PREDICTED: uncharacterized protein LOC105222945 isoform X1 [Bactrocera dorsalis]	-	-	-	-	-	-	-
LOC105231029	140	91	93	116	104	322	326	240	366	392	11	8.45	7.32	10.47	9.55	32.19	24.2	26.89	36.06	33.73	9.358	30.614	1.70992	1.12561e-32	1.22728e-31	Pcd	PREDICTED: pterin-4-alpha-carbinolamine dehydratase isoform X1 [Bactrocera dorsalis]	Metabolism;Metabolism	Global and overview maps;Metabolism of cofactors and vitamins	ko01100//Metabolic pathways;ko00790//Folate biosynthesis	K01724;K01724	-	-	-
LOC105228850	473	424	425	433	351	136	187	116	174	174	16.4	17.4	14.73	17.18	14.24	5.98	6.11	5.69	7.55	6.61	15.99	6.388	-1.32373	1.14469e-32	1.24561e-31	Wdr18	PREDICTED: WD repeat-containing protein 18 [Bactrocera dorsalis]	-	-	-	-	-	-	-
LOC105228578	251	217	249	239	260	44	95	27	51	48	4.79	4.9	4.75	5.22	5.8	1.06	1.71	0.73	1.22	1	5.092	1.144	-2.15415	1.64896e-32	1.78904e-31	Hmg20a	PREDICTED: activating transcription factor 3 [Bactrocera dorsalis]	-	-	-	-	-	-	-
LOC105224147	1026	764	569	915	503	2994	2851	2657	2347	2729	27.25	23.99	15.1	27.81	15.63	100.84	71.32	99.78	78.01	79.43	21.956	85.876	1.96764	1.68995e-32	1.83172e-31	-	-	-	-	-	-	-	-	-
LOC105222525	159	159	151	130	123	303	417	272	427	442	5.2	6.15	4.93	4.86	4.71	12.56	12.84	12.57	17.47	15.84	5.17	14.256	1.46333	1.92232e-32	2.0795e-31	TMEM19	PREDICTED: transmembrane protein 19 [Bactrocera dorsalis]	-	-	-	-	GO:0031224//intrinsic component of membrane	-	-
LOC105229017	685	542	569	555	566	203	359	186	246	250	12.7	11.91	10.56	11.78	12.31	4.8	6.3	4.88	5.72	5.08	11.852	5.356	-1.1459	2.09174e-32	2.26056e-31	--	PREDICTED: transcriptional repressor CTCF [Bactrocera dorsalis]	-	-	-	-	-	GO:0043169//cation binding	-
LOC105222604	134	127	106	53	64	516	552	342	453	416	4.56	5.11	3.6	2.06	2.55	22.25	17.68	16.45	19.28	15.51	3.576	18.234	2.35021	2.6693e-32	2.8819e-31	Cyp6g1	PREDICTED: cytochrome P450 6g1-like [Bactrocera dorsalis]	-	-	-	-	-	GO:0016491//oxidoreductase activity;GO:0046906//tetrapyrrole binding	GO:0044710//single-organism metabolic process
LOC105229689	36	24	36	29	18	94	178	121	131	125	1.7	1.34	1.7	1.57	0.99	5.63	7.92	8.08	7.74	6.47	1.46	7.168	2.2956	3.85202e-32	4.14666e-31	GST1	PREDICTED: glutathione S-transferase 1 [Bactrocera dorsalis]	Human Diseases;Human Diseases;Metabolism;Organismal Systems;Human Diseases;Human Diseases;Metabolism;Metabolism;Metabolism;Human Diseases;Human Diseases	Cancers;Cancers;Xenobiotics biodegradation and metabolism;Aging;Cardiovascular diseases;Cancers;Xenobiotics biodegradation and metabolism;Metabolism of other amino acids;Xenobiotics biodegradation and metabolism;Cancers;Drug resistance	ko05200//Pathways in cancer;ko05225//Hepatocellular carcinoma;ko00983//Drug metabolism - other enzymes;ko04212//Longevity regulating pathway - worm;ko05418//Fluid shear stress and atherosclerosis;ko05215//Prostate cancer;ko00980//Metabolism of xenobiotics by cytochrome P450;ko00480//Glutathione metabolism;ko00982//Drug metabolism - cytochrome P450;ko05204//Chemical carcinogenesis;ko01524//Platinu…	K00799;K00799;K00799;K00799;K00799;K00799;K00799;K00799;K00799;K00799;K00799	GO:0044424//intracellular part	GO:0016765//transferase activity, transferring alkyl or aryl (other than methyl) groups	GO:0006790//sulfur compound metabolic process
LOC105223739	886	707	843	750	708	257	480	211	307	383	10.25	9.68	9.74	9.92	9.58	3.77	5.23	3.45	4.44	4.85	9.834	4.348	-1.17743	3.87912e-32	4.17175e-31	Nup154	PREDICTED: nuclear pore complex protein Nup155 [Bactrocera dorsalis]	Genetic Information Processing	Translation	ko03013//RNA transport	K14312	-	-	-
LOC105228680	534	464	529	403	498	162	262	130	173	219	9.51	9.78	9.42	8.21	10.38	3.66	4.4	3.27	3.86	4.28	9.46	3.894	-1.28059	4.27895e-32	4.5928e-31	snrnp27	PREDICTED: U4/U6.U5 small nuclear ribonucleoprotein 27 kDa protein [Bactrocera dorsalis]	Genetic Information Processing	Transcription	ko03040//Spliceosome	K12846	-	-	-
LOC105228334	279	288	246	260	218	826	808	443	650	693	14.18	17.32	12.5	15.12	12.97	53.25	38.69	31.84	41.35	38.61	14.418	40.748	1.49886	4.50627e-32	4.83209e-31	--	Chondroitin proteoglycan 2 [Bactrocera dorsalis]	-	-	-	-	-	GO:0097367//carbohydrate derivative binding	GO:0006022//aminoglycan metabolic process
LOC105223698	345	289	286	318	243	607	846	490	813	987	12.69	12.58	10.51	13.38	10.46	28.31	29.31	25.48	37.42	39.78	11.924	32.06	1.42691	4.74416e-32	5.08223e-31	GJ19153	PREDICTED: ubiquitin-like modifier-activating enzyme 5 [Bactrocera dorsalis]	-	-	-	-	-	-	-
LOC105233250	1046	685	929	750	788	222	463	212	250	249	9.76	7.6	8.67	7.9	8.61	2.55	4.05	2.77	2.82	2.52	8.508	2.942	-1.53202	6.38213e-32	6.8039e-31	H	PREDICTED: protein hairless [Bactrocera dorsalis]	Environmental Information Processing	Signal transduction	ko04330//Notch signaling pathway	K06064	-	-	-
LOC105231792	105	82	106	83	116	229	301	188	219	242	1.41	1.3	1.42	1.28	1.82	3.9	3.81	3.57	3.68	3.56	1.446	3.704	1.35702	8.2355e-32	8.76282e-31	-	-	-	-	-	-	-	-	-
LOC105224142	973	864	1090	867	886	219	512	186	249	311	23.92	25.14	26.78	24.39	25.49	6.83	11.86	6.47	7.66	8.38	25.144	8.24	-1.6095	8.98874e-32	9.53671e-31	MAN1	Inner nuclear membrane protein Man1 [Bactrocera dorsalis]	-	-	-	-	-	-	-
LOC105233889	2	8	5	3	2	96	130	44	110	141	0.04	0.19	0.1	0.07	0.05	2.48	2.49	1.27	2.79	3.14	0.09	2.434	4.75726	9.04047e-32	9.58238e-31	PCP20	PREDICTED: glycine-rich cell wall structural protein [Bactrocera dorsalis]	-	-	-	-	-	GO:0005214//structural constituent of chitin-based cuticle	GO:0042335//cuticle development
LOC105225433	207	131	180	155	128	658	590	449	402	451	14.24	10.67	12.38	12.2	10.31	57.42	38.24	43.68	34.62	34.01	11.96	41.594	1.79816	9.29963e-32	9.84761e-31	AGAP007347	PREDICTED: lysozyme c-1 isoform X1 [Bactrocera dorsalis]	-	-	-	-	-	-	-
LOC105222182	618	437	576	461	490	85	238	84	99	121	12.55	10.5	11.69	10.71	11.64	2.19	4.55	2.41	2.52	2.69	11.418	2.872	-1.99118	9.95392e-32	1.05304e-30	Ddx10	PREDICTED: probable ATP-dependent RNA helicase DDX10 [Bactrocera dorsalis]	-	-	-	-	-	GO:0003676//nucleic acid binding;GO:0016787//hydrolase activity	GO:0002164//larval development;GO:0030154//cell differentiation
LOC105232106	252	226	295	351	245	61	65	49	69	56	10.61	11.25	12.41	16.89	12.06	3.25	2.57	2.91	3.63	2.58	12.644	2.988	-2.0812	1.04673e-31	1.10523e-30	NINJ1	PREDICTED: ninjurin-1 isoform X1 [Bactrocera dorsalis]	-	-	-	-	GO:0031224//intrinsic component of membrane	-	GO:0009888//tissue development;GO:0022610//biological adhesion
LOC105225477	157	118	128	113	102	221	387	215	266	284	5.62	5	4.58	4.63	4.27	10.03	13.05	10.88	11.91	11.14	4.82	11.402	1.24218	1.24217e-31	1.31033e-30	--	juvenile hormone-inducible protein 26 [Bactrocera dorsalis]	-	-	-	-	-	GO:0016740//transferase activity	-
LOC105233716	457	369	382	382	339	952	879	882	966	936	7.95	7.59	6.64	7.6	6.9	20.99	14.4	21.68	21.02	17.84	7.336	19.186	1.38699	1.30189e-31	1.37202e-30	--	PREDICTED: probable WRKY transcription factor protein 1 [Bactrocera dorsalis]	-	-	-	-	-	-	-
LOC105223532	0	1	7	2	2	668	721	249	1628	1177	0	0.14	0.82	0.27	0.27	99.28	79.6	41.26	238.78	151.18	0.3	122.02	8.66794	1.38934e-31	1.46139e-30	--	PREDICTED: uncharacterized protein LOC105223532 [Bactrocera dorsalis]	-	-	-	-	-	-	-
LOC105225237	333	323	331	379	289	666	957	543	965	978	9.39	10.65	9.27	12.04	9.49	23.6	25.32	21.23	33.86	29.78	10.168	26.758	1.39593	1.41794e-31	1.49005e-30	Oat	PREDICTED: ornithine aminotransferase, mitochondrial [Bactrocera dorsalis]	Metabolism;Metabolism	Global and overview maps;Amino acid metabolism	ko01100//Metabolic pathways;ko00330//Arginine and proline metabolism	K00819;K00819	GO:0044429//mitochondrial part	GO:0008483//transaminase activity;GO:0043168//anion binding	GO:0030154//cell differentiation;GO:1901605//alpha-amino acid metabolic process
LOC105227093	639	519	560	564	518	232	350	188	227	306	10.77	10.35	9.43	10.87	10.21	4.96	5.55	4.48	4.79	5.65	10.326	5.086	-1.02168	1.53275e-31	1.60917e-30	Dis3	PREDICTED: exosome complex exonuclease RRP44 [Bactrocera dorsalis]	Genetic Information Processing	Folding, sorting and degradation	ko03018//RNA degradation	K12585	-	-	GO:0090304//nucleic acid metabolic process
LOC105229066	88	79	89	70	74	227	236	147	211	257	5.08	5.4	5.13	4.62	5	16.61	12.83	12	15.24	16.26	5.046	14.588	1.53157	1.93784e-31	2.03252e-30	nrm	PREDICTED: nurim homolog [Bactrocera dorsalis]	-	-	-	-	GO:0012505//endomembrane system	-	GO:0045168//cell-cell signaling involved in cell fate commitment
LOC105231050	169	129	155	144	139	23	47	14	23	40	6.14	5.55	5.63	5.99	5.91	1.06	1.61	0.72	1.05	1.59	5.844	1.206	-2.27673	1.99254e-31	2.08791e-30	UPP1	PREDICTED: uridine phosphorylase 1 [Bactrocera dorsalis]	Metabolism;Metabolism;Metabolism	Global and overview maps;Xenobiotics biodegradation and metabolism;Nucleotide metabolism	ko01100//Metabolic pathways;ko00983//Drug metabolism - other enzymes;ko00240//Pyrimidine metabolism	K00757;K00757;K00757	GO:0044424//intracellular part	GO:0016763//transferase activity, transferring pentosyl groups	GO:0006222//UMP biosynthetic process
LOC105225859	878	633	879	564	692	209	380	164	217	274	9.8	8.36	9.84	7.23	9.05	2.96	4	2.57	3.06	3.34	8.856	3.186	-1.47491	2.24837e-31	2.35374e-30	wts	PREDICTED: serine/threonine-protein kinase Warts [Bactrocera dorsalis]	Environmental Information Processing;Environmental Information Processing;Cellular Processes;Environmental Information Processing	Signal transduction;Signal transduction;Cell growth and death;Signal transduction	ko04390//Hippo signaling pathway;ko04391//Hippo signaling pathway -fly;ko04214//Apoptosis - fly;ko04392//Hippo signaling pathway - multiple species	K08791;K08791;K08791;K08791	GO:0070161//anchoring junction	GO:0004672//protein kinase activity;GO:0005488//binding	GO:0001654//eye development;GO:0006355//regulation of transcription, DNA-templated;GO:0006464//cellular protein modification process;GO:0006796//phosphate-containing compound metabolic process;GO:0007297//ovarian follicle cell migration;GO:0008285//negative regulation of cell proliferation;GO:0008630//intrinsic apoptotic signaling pathway in response to DNA damage;GO:0009314//response to radiatio…
LOC105228230	714	530	636	656	562	264	318	195	279	255	14.89	12.82	13.45	15.73	15.45	7.76	6.1	6.26	7.03	6.45	14.468	6.72	-1.10633	2.74809e-31	2.86602e-30	PDE12	PREDICTED: 2',5'-phosphodiesterase 12 isoform X1 [Bactrocera dorsalis]	-	-	-	-	-	-	-
MSTRG.4598	0	1	1	2	1	228	168	350	795	300	0	0.12	0.1	0.23	0.12	29.43	16.11	50.36	101.25	33.46	0.114	46.122	8.66028	2.9394e-31	3.06264e-30	--	-	-	-	-	-	-	-	-
LOC105233966	157	143	198	166	155	330	432	295	434	486	8.92	9.61	11.24	10.78	10.3	23.77	23.11	23.69	30.84	30.25	10.17	26.332	1.3725	3.09064e-31	3.21415e-30	PRDX6	PREDICTED: peroxiredoxin-6 [Bactrocera dorsalis]	-	-	-	-	-	GO:0003824//catalytic activity;GO:0016209//antioxidant activity	GO:0044710//single-organism metabolic process
LOC105224073	544	411	504	432	386	146	265	153	147	180	21.49	19.21	19.9	19.52	17.84	7.31	9.86	8.55	7.27	7.79	19.592	8.156	-1.26433	3.19966e-31	3.3244e-30	Ttc19	Tetratricopeptide repeat protein 19-like protein, mitochondrial, partial [Bactrocera dorsalis]	-	-	-	-	-	-	-
LOC105229394	284	183	170	88	183	1953	2163	1154	3444	3685	4.24	3.23	2.54	1.5	3.19	36.95	30.4	24.34	64.31	60.26	2.94	43.252	3.87888	3.20684e-31	3.32872e-30	-	-	-	-	-	-	-	-	-
LOC105222242	590	503	681	560	513	253	330	199	242	286	41.56	41.93	47.95	45.13	42.28	22.6	21.9	19.82	21.33	22.08	43.77	21.546	-1.02252	4.03811e-31	4.18371e-30	MRPS23	PREDICTED: probable 28S ribosomal protein S23, mitochondrial [Bactrocera dorsalis]	-	-	-	-	GO:0030529//intracellular ribonucleoprotein complex	-	GO:0010467//gene expression
LOC105230321	53	37	36	40	31	386	834	348	1112	1591	0.7	0.58	0.48	0.61	0.48	6.52	10.53	6.56	18.52	23.44	0.57	13.114	4.524	4.38009e-31	4.53376e-30	Tmem67	PREDICTED: meckelin isoform X1 [Bactrocera dorsalis]	-	-	-	-	-	-	GO:0007049//cell cycle
LOC105227365	140	110	127	98	84	234	367	215	333	292	6.38	5.93	5.79	5.11	4.48	13.53	15.76	13.86	18.99	14.59	5.538	15.346	1.47043	4.53703e-31	4.68741e-30	PLA2G12B	PREDICTED: group XIIA secretory phospholipase A2 [Bactrocera dorsalis]	Metabolism;Organismal Systems;Environmental Information Processing;Organismal Systems;Metabolism;Organismal Systems;Metabolism;Metabolism;Metabolism;Metabolism	Global and overview maps;Digestive system;Signal transduction;Circulatory system;Lipid metabolism;Digestive system;Lipid metabolism;Lipid metabolism;Lipid metabolism;Lipid metabolism	ko01100//Metabolic pathways;ko04972//Pancreatic secretion;ko04014//Ras signaling pathway;ko04270//Vascular smooth muscle contraction;ko00564//Glycerophospholipid metabolism;ko04975//Fat digestion and absorption;ko00565//Ether lipid metabolism;ko00590//Arachidonic acid metabolism;ko00592//alpha-Linolenic acid metabolism;ko00591//Linoleic acid metabolism	K01047;K01047;K01047;K01047;K01047;K01047;K01047;K01047;K01047;K01047	-	GO:0004620//phospholipase activity;GO:0046872//metal ion binding	GO:0006629//lipid metabolic process;GO:0006796//phosphate-containing compound metabolic process
LOC105227585	889	848	979	863	883	327	568	331	373	470	13.7	15.46	15.09	15.21	15.92	6.39	8.24	7.22	7.19	7.94	15.076	7.396	-1.02744	5.02275e-31	5.18438e-30	casc3	PREDICTED: protein CASC3 [Bactrocera dorsalis]	Genetic Information Processing;Genetic Information Processing	Translation;Translation	ko03013//RNA transport;ko03015//mRNA surveillance pathway	K14323;K14323	-	-	-
LOC105231701	274	150	193	224	134	1299	2632	880	2928	3042	27.41	17.76	19.3	25.64	15.69	164.82	248.05	124.48	366.61	333.56	21.16	247.504	3.54804	5.41686e-31	5.58594e-30	--	PREDICTED: eggshell protein 2A-like [Bactrocera latifrons]	-	-	-	-	-	-	-
LOC105225354	526	395	549	464	420	198	253	151	183	239	21.78	19.35	22.72	21.98	20.35	10.4	9.87	8.84	9.48	10.84	21.236	9.886	-1.10305	5.78978e-31	5.96493e-30	Pdcd2	PREDICTED: programmed cell death protein 2 [Bactrocera dorsalis]	-	-	-	-	-	-	-
LOC105230333	866	697	702	788	661	285	339	187	308	335	5.74	5.46	4.65	5.97	5.12	2.39	2.12	1.75	2.55	2.43	5.388	2.248	-1.26111	6.10209e-31	6.28083e-30	-	-	-	-	-	-	-	-	-
LOC105229759	449	334	426	381	396	100	195	93	124	178	16.32	14.37	15.48	15.84	16.84	4.61	6.68	4.78	5.64	7.09	15.77	5.76	-1.45304	7.28186e-31	7.48662e-30	pak1ip1	PREDICTED: p21-activated protein kinase-interacting protein 1-like [Bactrocera dorsalis]	-	-	-	-	-	-	GO:0006796//phosphate-containing compound metabolic process
LOC105222795	39	20	25	14	10	234	164	129	141	188	3.52	2.14	2.25	1.45	1.06	26.78	13.94	16.46	15.92	18.59	2.084	18.338	3.13741	7.28714e-31	7.48662e-30	SPINK2	PREDICTED: serine protease inhibitor Kazal-type 2-like [Bactrocera dorsalis]	-	-	-	-	-	-	-
LOC105222104	190	169	159	176	140	380	502	354	489	704	10.76	11.32	9	11.4	9.27	27.28	26.77	28.35	34.65	43.69	10.35	32.148	1.6351	7.64376e-31	7.8457e-30	GstD1	PREDICTED: glutathione S-transferase D1-like [Bactrocera dorsalis]	Human Diseases;Human Diseases;Metabolism;Organismal Systems;Human Diseases;Human Diseases;Metabolism;Metabolism;Metabolism;Human Diseases;Human Diseases	Cancers;Cancers;Xenobiotics biodegradation and metabolism;Aging;Cardiovascular diseases;Cancers;Xenobiotics biodegradation and metabolism;Metabolism of other amino acids;Xenobiotics biodegradation and metabolism;Cancers;Drug resistance	ko05200//Pathways in cancer;ko05225//Hepatocellular carcinoma;ko00983//Drug metabolism - other enzymes;ko04212//Longevity regulating pathway - worm;ko05418//Fluid shear stress and atherosclerosis;ko05215//Prostate cancer;ko00980//Metabolism of xenobiotics by cytochrome P450;ko00480//Glutathione metabolism;ko00982//Drug metabolism - cytochrome P450;ko05204//Chemical carcinogenesis;ko01524//Platinu…	K00799;K00799;K00799;K00799;K00799;K00799;K00799;K00799;K00799;K00799;K00799	-	-	-
LOC105224839	27	44	18	36	16	210	278	110	191	197	2.36	4.53	1.49	3.56	1.61	22.92	21.9	13.25	20.54	18.67	2.71	19.456	2.84385	8.03993e-31	8.23701e-30	--	PREDICTED: pupal cuticle protein G1A-like isoform X1 [Bactrocera dorsalis]	-	-	-	-	-	-	-
LOC105229438	139	151	172	126	127	306	404	323	302	335	4.96	6.38	6.11	5.11	5.28	13.79	13.54	16.26	13.42	12.99	5.568	14	1.3302	9.54744e-31	9.74528e-30	Sb	PREDICTED: proclotting enzyme [Bactrocera dorsalis]	-	-	-	-	-	GO:0070011//peptidase activity, acting on L-amino acid peptides	-
LOC105224409	873	613	722	642	661	1080	1654	1060	1547	1752	37.94	31.53	31.36	31.92	33.61	59.52	67.71	65.14	84.14	83.45	33.272	71.992	1.11353	9.71253e-31	9.90463e-30	Der-1	PREDICTED: derlin-1 [Bactrocera dorsalis]	Genetic Information Processing;Human Diseases	Folding, sorting and degradation;Neurodegenerative diseases	ko04141//Protein processing in endoplasmic reticulum;ko05014//Amyotrophic lateral sclerosis (ALS)	K11519;K11519	-	-	-
LOC105230068	27	26	21	29	23	110	114	118	129	144	1.27	1.45	0.99	1.56	1.27	6.57	5.05	7.85	7.6	7.43	1.308	6.9	2.39923	1.00936e-30	1.02837e-29	kraken	PREDICTED: probable serine hydrolase [Bactrocera dorsalis]	-	-	-	-	-	-	-
LOC105229342	246	202	290	246	185	70	78	47	46	72	5.9	5.72	6.92	6.73	5.17	2.12	1.75	1.59	1.37	1.89	6.088	1.744	-1.80357	1.19381e-30	1.21405e-29	Sdr16c6	PREDICTED: epidermal retinol dehydrogenase 2 [Bactrocera dorsalis]	Metabolism	Metabolism of cofactors and vitamins	ko00830//Retinol metabolism	K15734	-	GO:0003824//catalytic activity	GO:0044710//single-organism metabolic process
LOC105222961	1141	879	989	765	908	246	523	209	272	351	16.83	16.93	14.9	13.57	16.77	4.93	7.84	4.13	4.92	5.85	15.8	5.534	-1.51353	1.19917e-30	1.21839e-29	Lrrfip2	PREDICTED: leucine-rich repeat flightless-interacting protein 2 isoform X1 [Bactrocera dorsalis]	-	-	-	-	-	-	-
LOC105230340	248	161	233	180	151	488	923	440	974	1078	1.73	1.32	1.65	1.48	1.24	4.42	6.09	4.5	8.68	8.47	1.484	6.432	2.11578	1.33887e-30	1.35907e-29	sev	PREDICTED: protein sevenless isoform X1 [Bactrocera dorsalis]	Environmental Information Processing	Signal transduction	ko04013//MAPK signaling pathway - fly	K05088	-	GO:0016301//kinase activity	GO:0009987//cellular process
LOC105230849	124	105	102	109	109	21	19	14	14	21	5.43	5.44	4.47	5.46	5.59	1.17	0.78	0.87	0.77	1.01	5.278	0.92	-2.52029	1.35632e-30	1.37552e-29	--	CG4115 [Drosophila melanogaster]	-	-	-	-	-	-	-
LOC105224983	632	667	773	659	585	253	367	224	246	246	9.76	12.19	11.93	11.65	10.57	4.96	5.34	4.89	4.76	4.16	11.22	4.822	-1.21837	1.38718e-30	1.40424e-29	Myb	PREDICTED: myb protein [Bactrocera dorsalis]	Human Diseases;Environmental Information Processing	Infectious diseases;Signal transduction	ko05166//HTLV-I infection;ko04151//PI3K-Akt signaling pathway	K09420;K09420	-	-	-
LOC105233155	160	117	115	183	123	23	21	13	13	22	9.93	8.59	7.14	13	8.93	1.81	1.23	1.14	1.01	1.5	9.518	1.338	-2.83058	1.60001e-30	1.61524e-29	-	-	-	-	-	-	-	-	-
LOC105224361	14697	11338	14600	11211	11053	2848	3643	1963	4054	4959	374.27	341.67	371.6	326.62	329.35	91.98	87.39	70.68	129.2	138.41	348.702	103.532	-1.75192	1.69757e-30	1.70904e-29	CBSL	PREDICTED: cystathionine beta-synthase [Bactrocera dorsalis]	Metabolism;Metabolism;Metabolism;Metabolism	Global and overview maps;Global and overview maps;Amino acid metabolism;Amino acid metabolism	ko01100//Metabolic pathways;ko01230//Biosynthesis of amino acids;ko00270//Cysteine and methionine metabolism;ko00260//Glycine, serine and threonine metabolism	K01697;K01697;K01697;K01697	GO:0044424//intracellular part	GO:0003824//catalytic activity	GO:0006563//L-serine metabolic process;GO:0019344//cysteine biosynthetic process
LOC105226802	152	119	121	145	116	361	385	253	413	331	2.67	2.47	2.12	2.91	2.38	8.04	6.37	6.28	9.08	6.37	2.51	7.228	1.52591	1.96575e-30	1.97182e-29	ea	PREDICTED: transmembrane protease serine 9 [Bactrocera dorsalis]	Organismal Systems	Immune system	ko04624//Toll and Imd signaling pathway	K20672	-	-	-
LOC105231555	830	671	825	761	633	267	479	238	275	382	9.59	9.18	9.53	10.06	8.57	3.91	5.22	3.89	3.99	4.84	9.386	4.37	-1.10288	2.49865e-30	2.5041e-29	--	PREDICTED: nuclear pore complex protein DDB_G0274915 [Bactrocera dorsalis]	Genetic Information Processing	Translation	ko03013//RNA transport	K14316	-	-	-
LOC105222093	657	631	700	609	650	222	335	238	238	335	12.38	14.06	13.18	13.12	14.33	5.3	5.94	6.34	5.61	6.92	13.414	6.022	-1.15542	2.69741e-30	2.69839e-29	Rb97D	PREDICTED: ribonucleoprotein RB97D [Bactrocera dorsalis]	Genetic Information Processing	Translation	ko03015//mRNA surveillance pathway	K14411	-	GO:0097159//organic cyclic compound binding;GO:1901363//heterocyclic compound binding	-
LOC105229155	293	285	280	236	266	577	628	477	543	532	5.6	6.45	5.35	5.16	5.95	14	11.32	12.9	13	11.15	5.702	12.474	1.12938	2.96165e-30	2.96004e-29	bw	PREDICTED: protein brown [Bactrocera dorsalis]	-	-	-	-	GO:0016021//integral component of membrane;GO:0043234//protein complex	GO:0032550//purine ribonucleoside binding;GO:0042626//ATPase activity, coupled to transmembrane movement of substances	GO:0019889//pteridine metabolic process;GO:0042441//eye pigment metabolic process;GO:0044765//single-organism transport;GO:0050954//sensory perception of mechanical stimulus
LOC105231149	4744	3633	4084	3685	3665	1285	2501	1133	1616	2014	99.06	90.28	86.14	87.21	88.09	34.91	49.7	34.41	43.76	46.79	90.156	41.914	-1.10499	3.12271e-30	3.11819e-29	Gspt1	PREDICTED: eukaryotic peptide chain release factor GTP-binding subunit ERF3A isoform X1 [Bactrocera dorsalis]	Genetic Information Processing	Translation	ko03015//mRNA surveillance pathway	K03267	-	GO:0017111//nucleoside-triphosphatase activity;GO:0032550//purine ribonucleoside binding	-
LOC105226967	205	164	177	176	171	311	425	286	330	468	6.16	5.83	5.32	6.05	6.01	11.86	12.03	12.16	12.41	15.42	5.874	12.776	1.12102	3.2428e-30	3.23225e-29	psh	PREDICTED: serine protease Hayan [Bactrocera dorsalis]	-	-	-	-	-	-	-
LOC105222650	2313	2039	2200	2787	2201	5601	10339	5018	5001	4952	33.31	34.93	32.4	46.01	37.29	105.12	143.91	104.79	92.46	80.54	36.788	105.364	1.51807	3.5514e-30	3.53347e-29	slgA	PREDICTED: proline dehydrogenase 1, mitochondrial isoform X1 [Bactrocera dorsalis]	Metabolism;Metabolism	Global and overview maps;Amino acid metabolism	ko01100//Metabolic pathways;ko00330//Arginine and proline metabolism	K00318;K00318	-	-	-
LOC105224476	324	291	337	320	293	115	174	101	118	129	9.78	10.39	10.16	11.05	10.35	4.4	4.95	4.31	4.46	4.27	10.346	4.478	-1.20815	3.96944e-30	3.94228e-29	bab2	PREDICTED: modifier of mdg4 [Bactrocera dorsalis]	-	-	-	-	-	-	-
LOC105226073	1677	1382	1724	1379	1490	2357	3389	2080	3122	3816	75.78	73.9	77.87	71.29	78.79	135.08	144.27	132.9	176.57	189	75.526	155.564	1.04246	4.18042e-30	4.14436e-29	eca	PREDICTED: transmembrane emp24 domain-containing protein eca [Bactrocera dorsalis]	-	-	-	-	-	-	-
LOC105226891	15	15	9	23	18	81	124	73	117	108	0.41	0.48	0.24	0.71	0.57	2.78	3.16	2.79	3.96	3.2	0.482	3.178	2.72101	4.47524e-30	4.42471e-29	--	PREDICTED: protein msta [Bactrocera dorsalis]	-	-	-	-	-	-	-
LOC105232255	852	704	759	773	628	1231	1721	1131	1728	1995	30.47	29.79	27.13	31.63	26.28	55.83	57.98	57.19	77.34	78.2	29.06	65.308	1.16823	4.82796e-30	4.76491e-29	gmppab	PREDICTED: mannose-1-phosphate guanyltransferase alpha-A [Bactrocera dorsalis]	Metabolism;Metabolism;Metabolism	Global and overview maps;Carbohydrate metabolism;Carbohydrate metabolism	ko01100//Metabolic pathways;ko00520//Amino sugar and nucleotide sugar metabolism;ko00051//Fructose and mannose metabolism	K00966;K00966;K00966	-	GO:0016772//transferase activity, transferring phosphorus-containing groups	-
LOC105231168	4396	3449	4496	3034	3269	1436	2121	1486	1587	1670	97.7	90.39	99.87	76.59	84.88	39.83	43.55	45.72	42.85	39.48	89.886	42.286	-1.08792	5.19574e-30	5.1233e-29	Gtpbp1	PREDICTED: GTP-binding protein 1 [Bactrocera dorsalis]	-	-	-	-	-	GO:0017111//nucleoside-triphosphatase activity;GO:0032550//purine ribonucleoside binding	-
LOC105225272	1633	1195	1277	1400	1546	362	502	445	348	551	116.57	100.95	91.11	114.34	129.13	32.77	33.76	44.92	31.09	43.11	110.42	37.13	-1.57234	5.86507e-30	5.77299e-29	TpnC73F	PREDICTED: troponin C, isoform 3 [Bactrocera cucurbitae]	-	-	-	-	-	GO:0046872//metal ion binding	-
LOC105227973	333	327	577	295	337	67	92	77	54	79	1.92	2.18	3.28	1.91	2.28	0.48	0.48	0.61	0.37	0.47	2.314	0.482	-2.26328	7.0038e-30	6.87661e-29	Ppp1r9b	PREDICTED: uncharacterized protein LOC105227973 isoform X1 [Bactrocera dorsalis]	-	-	-	-	-	-	-
LOC105229833	20962	18604	20329	15310	16217	7682	7899	5828	5003	7050	1091.6	1146.43	1058.08	912.11	988.15	507.33	387.49	429.12	326.05	402.37	1039.27	410.472	-1.34022	7.005e-30	6.87661e-29	ADH1	PREDICTED: alcohol dehydrogenase 1 [Bactrocera dorsalis]	-	-	-	-	-	-	-
LOC105229989	846	796	925	828	855	385	544	279	394	408	7.94	8.75	8.68	8.67	9.2	4.48	4.73	3.61	4.53	4.18	8.648	4.306	-1.00602	7.45971e-30	7.31648e-29	Asap	PREDICTED: arf-GAP with SH3 domain, ANK repeat and PH domain-containing protein 2 isoform X1 [Bactrocera dorsalis]	Cellular Processes;Organismal Systems	Transport and catabolism;Immune system	ko04144//Endocytosis;ko04666//Fc gamma R-mediated phagocytosis	K12488;K12488	-	-	-
LOC105224419	330	258	248	299	255	571	787	646	651	575	18.15	16.76	13.57	18.78	16.4	39.77	40.7	50.16	44.78	34.6	16.732	42.002	1.32785	8.42258e-30	8.25353e-29	--	PREDICTED: peroxisomal membrane protein 2 [Bactrocera dorsalis]	Cellular Processes	Transport and catabolism	ko04146//Peroxisome	K13347	-	-	-
LOC105232613	818	709	938	724	814	292	477	222	237	322	5.25	5.28	5.83	5.21	6.05	2.33	2.83	1.94	1.82	2.2	5.524	2.224	-1.31256	8.57037e-30	8.3909e-29	Dgkq	PREDICTED: diacylglycerol kinase theta isoform X1 [Bactrocera dorsalis]	Metabolism;Environmental Information Processing;Environmental Information Processing;Metabolism;Human Diseases;Metabolism	Global and overview maps;Signal transduction;Signal transduction;Lipid metabolism;Cancers;Lipid metabolism	ko01100//Metabolic pathways;ko04072//Phospholipase D signaling pathway;ko04070//Phosphatidylinositol signaling system;ko00564//Glycerophospholipid metabolism;ko05231//Choline metabolism in cancer;ko00561//Glycerolipid metabolism	K00901;K00901;K00901;K00901;K00901;K00901	-	GO:0016301//kinase activity;GO:0032550//purine ribonucleoside binding;GO:0043169//cation binding	GO:0006796//phosphate-containing compound metabolic process;GO:0007186//G-protein coupled receptor signaling pathway
LOC105222867	8	6	15	9	8	90	124	75	51	103	0.21	0.19	0.4	0.28	0.25	3.06	3.12	2.83	1.7	3.01	0.266	2.744	3.36678	1.11892e-29	1.09259e-28	--	PREDICTED: nucleolin [Drosophila elegans]	-	-	-	-	-	-	-
LOC105228786	222	143	229	169	208	25	42	45	35	36	1.99	1.52	2.06	1.74	2.19	0.28	0.36	0.57	0.39	0.35	1.9	0.39	-2.28445	1.12959e-29	1.10202e-28	S	PREDICTED: protein Star [Bactrocera dorsalis]	-	-	-	-	GO:0016020//membrane;GO:0044432//endoplasmic reticulum part	-	GO:0000301//retrograde transport, vesicle recycling within Golgi;GO:0001709//cell fate determination;GO:0001754//eye photoreceptor cell differentiation;GO:0007173//epidermal growth factor receptor signaling pathway;GO:0007281//germ cell development;GO:0007389//pattern specification process;GO:0007445//determination of imaginal disc primordium;GO:0030534//adult behavior;GO:0035114//imaginal disc-d…
LOC105229078	926	862	982	821	839	260	527	286	337	439	62.35	68.68	66.08	63.24	66.1	22.2	33.43	27.23	28.4	32.39	65.29	28.73	-1.1843	1.41469e-29	1.37652e-28	Pfdn2	PREDICTED: probable prefoldin subunit 2 [Bactrocera dorsalis]	-	-	-	-	GO:0043234//protein complex	GO:0005515//protein binding	-
LOC105230584	28620	27532	30619	22997	25493	11848	13454	10873	10648	11880	665.57	757.66	711.69	611.85	693.7	349.43	294.74	357.52	309.9	302.8	688.094	322.878	-1.09162	1.41749e-29	1.37803e-28	SLC2A3	PREDICTED: solute carrier family 2, facilitated glucose transporter member 1 [Bactrocera dorsalis]	-	-	-	-	-	-	-
LOC105228492	244	203	207	190	224	400	496	390	480	589	7.79	7.67	6.6	6.94	8.36	16.19	14.91	17.6	19.17	20.6	7.472	17.694	1.24369	1.51456e-29	1.47109e-28	Pigu	PREDICTED: phosphatidylinositol glycan anchor biosynthesis class U protein [Bactrocera dorsalis]	Metabolism;Metabolism	Global and overview maps;Glycan biosynthesis and metabolism	ko01100//Metabolic pathways;ko00563//Glycosylphosphatidylinositol(GPI)-anchor biosynthesis	K05293;K05293	GO:0031224//intrinsic component of membrane	-	GO:0006497//protein lipidation;GO:0033157//regulation of intracellular protein transport
LOC105222837	532	395	615	475	516	1028	1267	782	789	1018	4.29	3.78	4.98	4.37	4.88	10.56	9.65	8.96	7.97	9	4.46	9.228	1.04897	1.52156e-29	1.47659e-28	Egfr	PREDICTED: epidermal growth factor receptor isoform X1 [Bactrocera dorsalis]	Human Diseases;Human Diseases;Cellular Processes;Human Diseases;Environmental Information Processing;Human Diseases;Environmental Information Processing;Environmental Information Processing;Environmental Information Processing;Cellular Processes;Human Diseases;Environmental Information Processing;Organismal Systems;Cellular Processes;Human Diseases;Environmental Information Processing;Environment…	Cancers;Infectious diseases;Transport and catabolism;Cancers;Signal transduction;Cancers;Signal transduction;Signal transduction;Signal transduction;Cellular community - eukaryotes;Infectious diseases;Signal transduction;Endocrine system;Cell motility;Cancers;Signal transduction;Signal transduction;Cancers;Signal transduction;Endocrine and metabolic diseases;Signal transduction;Cancers;Endocrine …	ko05200//Pathways in cancer;ko05165//Human papillomavirus infection;ko04144//Endocytosis;ko05205//Proteoglycans in cancer;ko04151//PI3K-Akt signaling pathway;ko05225//Hepatocellular carcinoma;ko04010//MAPK signaling pathway;ko04013//MAPK signaling pathway - fly;ko04014//Ras signaling pathway;ko04510//Focal adhesion;ko05163//Human cytomegalovirus infection;ko04015//Rap1 signaling pathway;ko04921//…	K04361;K04361;K04361;K04361;K04361;K04361;K04361;K04361;K04361;K04361;K04361;K04361;K04361;K04361;K04361;K04361;K04361;K04361;K04361;K04361;K04361;K04361;K04361;K04361;K04361;K04361;K04361;K04361;K04361;K04361;K04361;K04361;K04361;K04361;K04361;K04361;K04361;K04361;K04361;K04361;K04361;K04361;K04361;K04361;K04361;K04361	-	GO:0004713//protein tyrosine kinase activity;GO:0032550//purine ribonucleoside binding	GO:0006468//protein phosphorylation;GO:0007167//enzyme linked receptor protein signaling pathway
LOC105228899	899	829	1087	711	775	205	461	194	244	307	21.56	23.52	26.05	19.5	21.74	6.23	10.41	6.58	7.32	8.07	22.474	7.722	-1.54121	1.6142e-29	1.56238e-28	--	GL10382 [Drosophila persimilis]	-	-	-	-	-	-	-
LOC105222552	47	31	21	24	14	253	307	90	248	362	0.65	0.51	0.29	0.38	0.23	4.45	4.01	1.77	4.31	5.51	0.412	4.01	3.28289	1.72285e-29	1.66608e-28	--	PREDICTED: mucin-5AC [Bactrocera dorsalis]	-	-	-	-	-	-	-
LOC105233335	851	687	801	808	655	353	424	282	299	417	17.5	16.82	16.51	19.01	15.76	9.21	8.21	8.2	7.7	9.4	17.12	8.544	-1.0027	1.72436e-29	1.66608e-28	moody	PREDICTED: G-protein coupled receptor moody [Bactrocera dorsalis]	-	-	-	-	GO:0031224//intrinsic component of membrane	GO:0004888//transmembrane signaling receptor activity	GO:0007166//cell surface receptor signaling pathway
LOC105223991	471	363	385	357	362	148	213	101	115	164	5.96	5.49	4.81	5.22	5.36	2.33	2.58	1.82	1.85	2.25	5.368	2.166	-1.30935	1.7494e-29	1.68731e-28	btl	PREDICTED: fibroblast growth factor receptor homolog 1 [Bactrocera dorsalis]	Human Diseases;Cellular Processes;Environmental Information Processing;Environmental Information Processing;Environmental Information Processing;Environmental Information Processing;Cellular Processes;Human Diseases;Cellular Processes;Human Diseases;Human Diseases;Human Diseases	Cancers;Transport and catabolism;Signal transduction;Signal transduction;Signal transduction;Signal transduction;Cell motility;Cancers;Cellular community - eukaryotes;Cancers;Cancers;Drug resistance	ko05200//Pathways in cancer;ko04144//Endocytosis;ko04151//PI3K-Akt signaling pathway;ko04010//MAPK signaling pathway;ko04014//Ras signaling pathway;ko04015//Rap1 signaling pathway;ko04810//Regulation of actin cytoskeleton;ko05215//Prostate cancer;ko04550//Signaling pathways regulating pluripotency of stem cells;ko05226//Gastric cancer;ko05230//Central carbon metabolism in cancer;ko01521//EGFR tyr…	K05093;K05093;K05093;K05093;K05093;K05093;K05093;K05093;K05093;K05093;K05093;K05093	GO:0031224//intrinsic component of membrane	GO:0004713//protein tyrosine kinase activity;GO:0032550//purine ribonucleoside binding	GO:0006468//protein phosphorylation;GO:0010646//regulation of cell communication
LOC105226472	14	12	12	18	18	94	128	100	120	75	0.68	0.69	0.58	1	1.02	5.78	5.85	6.85	7.28	3.98	0.794	5.948	2.90519	1.80193e-29	1.73602e-28	--	CG34454, partial [Drosophila busckii]	-	-	-	-	-	-	-
LOC105224740	312	241	251	255	285	81	125	64	85	76	5.48	5	4.4	5.12	5.85	1.81	2.07	1.59	1.87	1.47	5.17	1.762	-1.55295	1.91192e-29	1.83925e-28	POP1	PREDICTED: LOW QUALITY PROTEIN: ribonucleases P/MRP protein subunit POP1 [Bactrocera dorsalis]	Genetic Information Processing;Genetic Information Processing	Translation;Translation	ko03013//RNA transport;ko03008//Ribosome biogenesis in eukaryotes	K01164;K01164	-	GO:0004549//tRNA-specific ribonuclease activity	GO:0010467//gene expression;GO:0090501//RNA phosphodiester bond hydrolysis
LOC105225352	192	170	203	161	148	296	392	290	344	358	11.71	12.25	12.36	11.22	10.56	22.86	22.5	24.99	26.22	23.91	11.62	24.096	1.05218	2.00501e-29	1.92712e-28	DnaJ-60	PREDICTED: dnaJ-like protein 60 isoform X1 [Bactrocera dorsalis]	-	-	-	-	-	-	-
LOC105225256	686	501	707	482	554	205	317	181	174	201	7.81	6.75	8.04	6.28	7.38	2.96	3.4	2.91	2.48	2.51	7.252	2.852	-1.3464	2.13847e-29	2.0536e-28	-	-	-	-	-	-	-	-	-
LOC105231181	225	125	34	188	64	3984	4368	2376	4528	4378	16.99	11.17	2.57	16.25	5.66	381.62	310.79	253.75	428.02	362.42	10.528	347.32	5.04396	2.14911e-29	2.06203e-28	Acp1	PREDICTED: adult cuticle protein 1 [Bactrocera dorsalis]	-	-	-	-	-	-	-
LOC105227112	7	4	5	13	4	170	210	174	509	444	0.27	0.21	0.22	0.53	0.18	8.03	7.2	9.61	25.22	18.04	0.282	13.62	5.59389	2.16209e-29	2.07268e-28	--	PREDICTED: uncharacterized protein LOC105227112 isoform X2 [Bactrocera dorsalis]	-	-	-	-	-	-	-
LOC105223094	1739	1462	1731	1991	1457	3193	4376	2900	3162	2855	88.82	88.37	88.37	116.34	87.08	206.83	210.55	209.44	202.13	159.82	93.796	197.754	1.07611	2.6219e-29	2.50044e-28	--	GL19613 [Drosophila persimilis]	-	-	-	-	-	-	-
LOC105229796	664	695	698	561	617	1459	1392	1004	1408	1515	50.65	62.74	53.22	48.96	55.08	141.15	100.03	108.3	134.43	126.67	54.13	122.116	1.17375	2.79106e-29	2.65716e-28	DBI	PREDICTED: acyl-CoA-binding protein [Bactrocera dorsalis]	-	-	-	-	-	-	-
LOC105226854	183	144	51	97	86	616	829	468	517	650	3.31	3.08	0.92	2.01	1.82	14.13	14.12	11.97	11.7	12.88	2.228	12.96	2.54024	3.09023e-29	2.93945e-28	--	PREDICTED: probable serine/threonine-protein kinase nek3 [Bactrocera dorsalis]	-	-	-	-	-	-	-
LOC105229170	24	13	24	15	17	79	115	93	82	94	0.65	0.41	0.65	0.46	0.54	2.7	2.92	3.55	2.77	2.78	0.542	2.944	2.44141	3.37613e-29	3.20863e-28	crhr1	PREDICTED: diuretic hormone receptor [Bactrocera dorsalis]	Environmental Information Processing;Human Diseases;Organismal Systems	Signaling molecules and interaction;Endocrine and metabolic diseases;Nervous system	ko04080//Neuroactive ligand-receptor interaction;ko04934//Cushing syndrome;ko04730//Long-term depression	K04578;K04578;K04578	GO:0031224//intrinsic component of membrane	GO:0004888//transmembrane signaling receptor activity	GO:0007166//cell surface receptor signaling pathway
LOC105230846	600	540	671	554	527	226	337	202	217	201	8.74	9.09	9.46	9.3	9	4.3	4.55	4.17	3.83	3.29	9.118	4.028	-1.17865	3.78327e-29	3.59247e-28	hs6st3b	PREDICTED: heparan-sulfate 6-O-sulfotransferase 1 isoform X1 [Bactrocera dorsalis]	Metabolism	Glycan biosynthesis and metabolism	ko00534//Glycosaminoglycan biosynthesis - heparan sulfate / heparin	K02514	GO:0031224//intrinsic component of membrane	-	-
LOC105232913	318	261	205	304	209	21	33	16	41	59	9.35	9.08	6.02	10.22	7.19	0.78	0.91	0.67	1.51	1.9	8.372	1.154	-2.85893	4.35494e-29	4.12467e-28	-	-	-	-	-	-	-	-	-
LOC105227484	2048	1609	2321	1993	2088	600	1040	397	418	567	33.1	30.78	37.5	36.86	39.49	12.3	15.84	9.07	8.46	10.04	35.546	11.142	-1.67368	4.59027e-29	4.34011e-28	eas	PREDICTED: LOW QUALITY PROTEIN: ethanolamine kinase [Bactrocera dorsalis]	Metabolism;Metabolism	Global and overview maps;Lipid metabolism	ko01100//Metabolic pathways;ko00564//Glycerophospholipid metabolism	K00894;K00894	-	-	-
LOC105222551	249	268	236	326	251	567	708	521	563	623	3.55	4.52	3.36	5.31	4.18	10.24	9.5	10.49	10.04	9.72	4.184	9.998	1.25676	4.84424e-29	4.57631e-28	ABCG8	PREDICTED: uncharacterized ABC transporter ATP-binding protein/permease YOL075C [Bactrocera dorsalis]	-	-	-	-	-	GO:0017111//nucleoside-triphosphatase activity	-
LOC105227366	36	22	13	43	38	448	498	258	643	891	0.46	0.34	0.17	0.63	0.57	7.32	6.04	4.7	10.37	12.58	0.434	8.202	4.24021	5.12504e-29	4.83744e-28	Orct	PREDICTED: solute carrier family 22 member 4 [Bactrocera dorsalis]	-	-	-	-	-	-	-
LOC105233800	19	12	32	42	33	494	1418	2092	4152	2208	1.28	0.96	2.16	3.24	2.6	42.23	90.05	199.41	350.34	163.15	2.048	169.036	6.36697	5.98558e-29	5.64004e-28	--	PREDICTED: uncharacterized protein LOC105233800 [Bactrocera dorsalis]	-	-	-	-	-	-	-
LOC115066523	237	163	179	171	160	54	66	36	49	50	19.59	15.95	14.79	16.17	15.48	5.66	5.14	4.21	5.07	4.53	16.396	4.922	-1.73603	6.04749e-29	5.69352e-28	VLDLR	PREDICTED: low-density lipoprotein receptor [Bactrocera dorsalis]	-	-	-	-	-	-	-
LOC105227110	274	276	297	283	315	54	124	59	82	97	7.04	8.39	7.62	8.32	9.47	1.76	3	2.14	2.64	2.73	8.168	2.454	-1.73485	7.16564e-29	6.72899e-28	Pym	PREDICTED: partner of Y14 and mago [Bactrocera dorsalis]	Genetic Information Processing;Genetic Information Processing	Translation;Translation	ko03013//RNA transport;ko03015//mRNA surveillance pathway	K14294;K14294	GO:0043234//protein complex;GO:0044424//intracellular part	-	GO:0000956//nuclear-transcribed mRNA catabolic process
LOC105233714	1308	1156	1418	1128	1070	408	764	429	381	534	25.99	27.25	28.18	25.76	24.92	10.28	14.23	11.95	9.47	11.63	26.42	11.512	-1.19849	8.96479e-29	8.39707e-28	sina	E3 ubiquitin-protein ligase sina, partial [Bactrocera dorsalis]	Environmental Information Processing;Genetic Information Processing;Environmental Information Processing;Cellular Processes	Signal transduction;Folding, sorting and degradation;Signal transduction;Cell growth and death	ko04013//MAPK signaling pathway - fly;ko04120//Ubiquitin mediated proteolysis;ko04310//Wnt signaling pathway;ko04115//p53 signaling pathway	K04506;K04506;K04506;K04506	GO:0043231//intracellular membrane-bounded organelle	GO:0003824//catalytic activity;GO:0046914//transition metal ion binding	GO:0019941//modification-dependent protein catabolic process;GO:0032446//protein modification by small protein conjugation;GO:0044707//single-multicellular organism process
LOC105234225	1378	1118	1219	1169	1061	1876	3318	2170	1884	2134	50.02	48.02	44.23	48.55	45.07	86.36	113.46	111.38	85.59	84.9	47.178	96.338	1.02999	9.91171e-29	9.27615e-28	slc39a1	PREDICTED: protein zntC-like [Bactrocera dorsalis]	-	-	-	-	-	-	-
LOC105227411	2268	1925	2319	1866	2053	809	1476	652	883	949	25.48	25.57	26.11	23.98	27.02	11.61	15.81	10.53	12.51	11.72	25.632	12.436	-1.04342	1.05249e-28	9.82505e-28	Ac76E	PREDICTED: adenylate cyclase type 2 isoform X1 [Bactrocera dorsalis]	Human Diseases;Organismal Systems;Metabolism;Human Diseases;Organismal Systems;Environmental Information Processing;Organismal Systems;Human Diseases;Cellular Processes;Environmental Information Processing;Organismal Systems;Environmental Information Processing;Environmental Information Processing;Environmental Information Processing;Human Diseases;Organismal Systems;Organismal Systems;Organismal…	Cancers;Environmental adaptation;Nucleotide metabolism;Infectious diseases;Digestive system;Signal transduction;Nervous system;Infectious diseases;Cell growth and death;Signal transduction;Endocrine system;Signal transduction;Signal transduction;Signal transduction;Endocrine and metabolic diseases;Circulatory system;Circulatory system;Digestive system;Endocrine system;Endocrine system;Endocrine s…	ko05200//Pathways in cancer;ko04714//Thermogenesis;ko00230//Purine metabolism;ko05166//HTLV-I infection;ko04972//Pancreatic secretion;ko04024//cAMP signaling pathway;ko04723//Retrograde endocannabinoid signaling;ko05163//Human cytomegalovirus infection;ko04114//Oocyte meiosis;ko04015//Rap1 signaling pathway;ko04921//Oxytocin signaling pathway;ko04020//Calcium signaling pathway;ko04072//Phospholip…	K08042;K08042;K08042;K08042;K08042;K08042;K08042;K08042;K08042;K08042;K08042;K08042;K08042;K08042;K08042;K08042;K08042;K08042;K08042;K08042;K08042;K08042;K08042;K08042;K08042;K08042;K08042;K08042;K08042;K08042;K08042;K08042;K08042;K08042;K08042;K08042;K08042;K08042;K08042;K08042;K08042;K08042;K08042;K08042;K08042;K08042;K08042	GO:0031224//intrinsic component of membrane	GO:0016829//lyase activity	GO:0007165//signal transduction;GO:0009165//nucleotide biosynthetic process
LOC105226890	1	4	5	4	6	69	92	46	60	65	0.03	0.15	0.16	0.15	0.22	2.8	2.77	2.08	2.4	2.28	0.142	2.466	4.11821	1.12859e-28	1.05176e-27	--	Protein msta, isoform B [Bactrocera dorsalis]	-	-	-	-	-	-	-
LOC105223174	290	249	307	271	226	42	121	60	69	68	16.23	16.49	17.17	17.35	14.8	2.98	6.38	4.75	4.83	4.17	16.408	4.622	-1.82781	1.63037e-28	1.51554e-27	CG1789	PREDICTED: probable U3 small nucleolar RNA-associated protein 11 [Bactrocera dorsalis]	-	-	-	-	-	-	-
LOC105222459	185	144	155	118	161	310	384	238	300	329	4.53	4.17	3.79	3.31	4.61	9.63	8.86	8.24	9.2	8.83	4.082	8.952	1.13293	1.73759e-28	1.61386e-27	CdsA	PREDICTED: phosphatidate cytidylyltransferase, photoreceptor-specific [Bactrocera dorsalis]	Metabolism;Environmental Information Processing;Metabolism	Global and overview maps;Signal transduction;Lipid metabolism	ko01100//Metabolic pathways;ko04070//Phosphatidylinositol signaling system;ko00564//Glycerophospholipid metabolism	K00981;K00981;K00981	GO:0005783//endoplasmic reticulum;GO:0016021//integral component of membrane	GO:0070567//cytidylyltransferase activity	GO:0007186//G-protein coupled receptor signaling pathway;GO:0009266//response to temperature stimulus;GO:0009887//organ morphogenesis;GO:0032879//regulation of localization;GO:0040007//growth;GO:0046341//CDP-diacylglycerol metabolic process;GO:0051235//maintenance of location;GO:0060446//branching involved in open tracheal system development
LOC105223449	716	548	740	559	554	205	380	173	261	269	12.38	11.21	12.79	11.06	11.21	4.5	6.19	4.23	5.65	5.1	11.73	5.134	-1.19205	1.87445e-28	1.73804e-27	tdrd3	PREDICTED: tudor domain-containing protein 3 [Bactrocera dorsalis]	-	-	-	-	GO:0043231//intracellular membrane-bounded organelle	-	GO:0006396//RNA processing;GO:0045168//cell-cell signaling involved in cell fate commitment
LOC105224907	231	170	245	191	178	49	88	49	56	75	6.51	5.67	6.9	6.16	5.87	1.75	2.34	1.95	1.98	2.32	6.222	2.068	-1.58914	2.0269e-28	1.8731e-27	sn	PREDICTED: protein singed [Bactrocera dorsalis]	Human Diseases	Cancers	ko05206//MicroRNAs in cancer	K17455	GO:0005856//cytoskeleton;GO:0042995//cell projection;GO:0043234//protein complex;GO:0044297//cell body	GO:0003779//actin binding	GO:0003002//regionalization;GO:0007281//germ cell development;GO:0009611//response to wounding;GO:0009886//post-embryonic morphogenesis;GO:0009887//organ morphogenesis;GO:0016477//cell migration;GO:0030031//cell projection assembly;GO:0031175//neuron projection development;GO:0035316//non-sensory hair organization;GO:0048858//cell projection morphogenesis;GO:0051017//actin filament bundle assembly
LOC105233359	1016	957	1180	916	954	328	631	254	316	394	11.49	12.81	13.34	11.85	12.62	4.7	6.72	4.06	4.47	4.88	12.422	4.966	-1.32274	2.40903e-28	2.22066e-27	-	-	-	-	-	-	-	-	-
LOC105228337	336	273	319	264	275	107	160	102	106	129	8.42	8.09	7.99	7.56	8.06	3.4	3.78	3.61	3.32	3.54	8.024	3.53	-1.18465	2.46322e-28	2.26871e-27	--	PREDICTED: immunoglobulin A1 protease autotransporter isoform X1 [Stomoxys calcitrans]	-	-	-	-	-	-	-
LOC105222191	900	761	950	838	789	317	583	313	315	421	23.02	23.08	24.35	24.65	23.65	10.36	14.07	11.31	10.07	11.84	23.75	11.53	-1.04254	2.46905e-28	2.27219e-27	rho	PREDICTED: protein rhomboid [Bactrocera dorsalis]	Organismal Systems	Development	ko04320//Dorso-ventral axis formation	K02857	GO:0031224//intrinsic component of membrane	GO:0004175//endopeptidase activity;GO:0046872//metal ion binding	GO:0019538//protein metabolic process
LOC105231527	100	79	71	77	73	183	226	178	177	210	4.82	4.51	3.42	4.25	4.12	11.19	10.26	12.13	10.68	11.1	4.224	11.072	1.39023	2.77915e-28	2.55543e-27	SPAC11D3.03c	PREDICTED: uncharacterized protein C11D3.03c-like [Bactrocera dorsalis]	-	-	-	-	-	-	-
LOC105234044	94	74	101	88	86	217	240	179	173	234	0.61	0.57	0.66	0.66	0.66	1.8	1.48	1.66	1.42	1.68	0.632	1.608	1.34727	3.19011e-28	2.926e-27	mei-41	PREDICTED: serine/threonine-protein kinase ATR [Bactrocera dorsalis]	Human Diseases;Human Diseases;Cellular Processes;Cellular Processes;Cellular Processes;Genetic Information Processing;Cellular Processes	Infectious diseases;Infectious diseases;Cell growth and death;Cell growth and death;Cell growth and death;Replication and repair;Cell growth and death	ko05165//Human papillomavirus infection;ko05166//HTLV-I infection;ko04110//Cell cycle;ko04218//Cellular senescence;ko04214//Apoptosis - fly;ko03460//Fanconi anemia pathway;ko04115//p53 signaling pathway	K06640;K06640;K06640;K06640;K06640;K06640;K06640	-	GO:0004672//protein kinase activity;GO:0032550//purine ribonucleoside binding	GO:0006464//cellular protein modification process;GO:0006796//phosphate-containing compound metabolic process
LOC105233870	31	30	40	34	23	110	147	152	119	148	1.02	1.17	1.32	1.29	0.89	4.61	4.58	7.1	4.92	5.36	1.138	5.314	2.2233	3.45473e-28	3.16344e-27	--	GH21194 [Drosophila grimshawi]	-	-	-	-	-	-	-
LOC105225402	430	279	402	315	363	76	171	87	103	132	3.47	2.65	3.24	2.93	3.41	0.78	1.3	0.99	1.04	1.16	3.14	1.054	-1.57489	4.04514e-28	3.69487e-27	--	PREDICTED: ikaros family zinc finger protein isoform X1 [Bactrocera dorsalis]	-	-	-	-	-	-	-
LOC105225834	553	403	513	439	392	135	274	137	162	207	6.22	5.49	5.79	5.68	5.19	1.95	2.93	2.13	2.3	2.54	5.674	2.37	-1.25948	4.17472e-28	3.81008e-27	yem	PREDICTED: yemanuclein-alpha [Bactrocera dorsalis]	-	-	-	-	GO:0005634//nucleus	-	GO:0000003//reproduction;GO:0009987//cellular process;GO:0044699//single-organism process
LOC105231270	1597	1332	1598	1315	1310	460	946	404	527	687	26.49	25.98	26.4	24.89	25.26	9.65	14.86	9.35	10.8	12.47	25.804	11.426	-1.17527	4.26216e-28	3.88345e-27	R3hcc1l	PREDICTED: mucin-5AC [Bactrocera dorsalis]	-	-	-	-	-	-	-
LOC105224657	775	710	780	870	754	1441	1647	1346	1247	1568	18.5	20.05	18.61	23.76	21.06	43.62	37.03	45.43	37.25	41.02	20.396	40.87	1.00276	4.38902e-28	3.99575e-27	Spn42Dd	PREDICTED: serine protease inhibitor 42Dd [Bactrocera dorsalis]	Organismal Systems	Immune system	ko04624//Toll and Imd signaling pathway	K20698	-	-	-
LOC105227668	245	201	286	297	232	64	99	55	64	93	6.11	5.93	7.13	8.47	6.77	2.02	2.33	1.94	2	2.54	6.882	2.166	-1.66779	4.93537e-28	4.48944e-27	Cyp4aa1	PREDICTED: probable cytochrome P450 4aa1 [Bactrocera dorsalis]	-	-	-	-	-	GO:0016491//oxidoreductase activity;GO:0046906//tetrapyrrole binding;GO:0046914//transition metal ion binding	GO:0044710//single-organism metabolic process
LOC105223535	78	56	87	77	69	176	234	122	169	192	1.21	1.03	1.35	1.37	1.26	3.47	3.43	2.68	3.29	3.27	1.244	3.228	1.37565	4.94905e-28	4.49818e-27	mei-9	PREDICTED: DNA repair endonuclease XPF [Bactrocera dorsalis]	Genetic Information Processing;Genetic Information Processing	Replication and repair;Replication and repair	ko03420//Nucleotide excision repair;ko03460//Fanconi anemia pathway	K10848;K10848	-	GO:0003676//nucleic acid binding;GO:0004518//nuclease activity	GO:0006259//DNA metabolic process
LOC105222493	1447	1207	1338	1212	1284	486	927	449	503	618	24.81	24.49	22.93	23.77	25.76	10.57	14.97	10.89	10.79	11.61	24.352	11.766	-1.04942	5.38636e-28	4.89162e-27	ncl1	PREDICTED: nicalin-1 isoform X2 [Bactrocera dorsalis]	-	-	-	-	-	-	-
LOC105227810	287	214	217	251	254	50	106	40	62	79	13.11	11.57	9.91	13.12	13.58	2.9	4.56	2.58	3.55	3.96	12.258	3.51	-1.80418	5.6709e-28	5.14578e-27	METTL18	PREDICTED: histidine protein methyltransferase 1 homolog [Bactrocera dorsalis]	-	-	-	-	-	GO:0003824//catalytic activity	GO:0008152//metabolic process
LOC105230675	104	55	74	93	70	289	308	212	462	379	16.08	10.11	11.42	16.68	12.6	56.63	44.76	46.53	89.31	64.23	13.378	60.292	2.1721	5.80823e-28	5.26174e-27	GH21310	PREDICTED: dolichyl-diphosphooligosaccharide--protein glycosyltransferase subunit 4 isoform X1 [Bactrocera cucurbitae]	-	-	-	-	-	GO:0004576//oligosaccharyl transferase activity	GO:0006486//protein glycosylation
LOC105224177	211	154	153	194	126	348	427	278	355	399	5.88	5.08	4.26	6.18	4.11	12.3	11.21	10.95	12.38	12.18	5.102	11.804	1.21014	5.82237e-28	5.27023e-27	--	GH14448 [Drosophila grimshawi]	-	-	-	-	-	-	-
LOC105233365	686	497	606	454	565	184	327	165	206	250	8.83	7.57	7.79	6.68	8.51	3	3.96	3	3.32	3.53	7.876	3.362	-1.22814	6.44705e-28	5.83088e-27	IntS3	PREDICTED: integrator complex subunit 3 homolog [Bactrocera dorsalis]	-	-	-	-	-	-	-
LOC105222821	821	614	789	622	672	267	465	232	255	353	7.77	6.88	7.47	6.74	7.44	3.21	4.15	3.11	3.02	3.66	7.26	3.43	-1.08176	7.31832e-28	6.60805e-27	PBRM1	PREDICTED: protein polybromo-1 [Bactrocera dorsalis]	Human Diseases	Cancers	ko05225//Hepatocellular carcinoma	K11757	GO:0043231//intracellular membrane-bounded organelle	-	-
LOC105225813	362	309	381	314	269	565	665	554	608	785	20.58	20.79	21.65	20.42	17.89	40.73	35.61	44.53	43.26	48.91	20.266	42.608	1.07206	7.5338e-28	6.79705e-27	GstD1	PREDICTED: glutathione S-transferase D1-like [Bactrocera dorsalis]	Human Diseases;Human Diseases;Metabolism;Organismal Systems;Human Diseases;Human Diseases;Metabolism;Metabolism;Metabolism;Human Diseases;Human Diseases	Cancers;Cancers;Xenobiotics biodegradation and metabolism;Aging;Cardiovascular diseases;Cancers;Xenobiotics biodegradation and metabolism;Metabolism of other amino acids;Xenobiotics biodegradation and metabolism;Cancers;Drug resistance	ko05200//Pathways in cancer;ko05225//Hepatocellular carcinoma;ko00983//Drug metabolism - other enzymes;ko04212//Longevity regulating pathway - worm;ko05418//Fluid shear stress and atherosclerosis;ko05215//Prostate cancer;ko00980//Metabolism of xenobiotics by cytochrome P450;ko00480//Glutathione metabolism;ko00982//Drug metabolism - cytochrome P450;ko05204//Chemical carcinogenesis;ko01524//Platinu…	K00799;K00799;K00799;K00799;K00799;K00799;K00799;K00799;K00799;K00799;K00799	-	-	-
LOC105228847	357	306	308	327	275	116	150	110	120	132	22.16	22.48	19.11	23.22	19.98	9.13	8.77	9.66	9.32	8.98	21.39	9.172	-1.22163	7.73374e-28	6.96605e-27	GJ16889	PREDICTED: tRNA (guanine-N(7)-)-methyltransferase [Bactrocera dorsalis]	-	-	-	-	-	-	-
LOC105228598	270	201	212	197	197	57	87	48	65	89	8.11	7.14	6.36	6.77	6.92	2.17	2.46	2.04	2.44	2.93	7.06	2.408	-1.55183	8.45381e-28	7.60843e-27	DSPTP1B	Dual specificity protein phosphatase 1B [Ceratitis capitata]	-	-	-	-	-	-	-
LOC105222156	210	173	214	195	181	58	91	57	59	66	6.3	6.14	6.42	6.69	6.36	2.21	2.57	2.42	2.22	2.17	6.382	2.318	-1.46113	8.56666e-28	7.70371e-27	Aatf	PREDICTED: protein Aatf [Bactrocera dorsalis]	-	-	-	-	-	-	-
LOC105228714	200	158	183	265	174	462	663	347	461	467	6.98	6.52	6.38	10.58	7.11	20.45	21.8	17.12	20.13	17.86	7.514	19.472	1.37375	8.83907e-28	7.93574e-27	Idgf1	PREDICTED: chitinase-like protein Idgf1 [Bactrocera dorsalis]	-	-	-	-	-	GO:0004553//hydrolase activity, hydrolyzing O-glycosyl compounds	GO:0006026//aminoglycan catabolic process;GO:0044238//primary metabolic process
LOC105225430	1058	673	730	818	779	211	426	168	208	305	3.23	2.43	2.23	2.86	2.78	0.82	1.22	0.72	0.79	1.02	2.706	0.914	-1.5659	9.27596e-28	8.31446e-27	MDN1	PREDICTED: LOW QUALITY PROTEIN: midasin [Bactrocera dorsalis]	Genetic Information Processing	Translation	ko03008//Ribosome biogenesis in eukaryotes	K14572	GO:0043231//intracellular membrane-bounded organelle	GO:0017111//nucleoside-triphosphatase activity;GO:0032550//purine ribonucleoside binding	GO:0065003//macromolecular complex assembly
LOC105233038	18	8	14	9	9	90	134	71	125	65	0.43	0.22	0.33	0.24	0.25	2.7	2.99	2.38	3.7	1.69	0.294	2.692	3.19479	9.34907e-28	8.37319e-27	Dscam2	PREDICTED: Down syndrome cell adhesion molecule-like protein Dscam2 [Bactrocera dorsalis]	-	-	-	-	-	-	-
LOC105233819	34	23	26	7	17	107	210	93	133	122	3.66	2.93	2.79	0.86	2.14	14.59	21.27	14.14	17.89	14.38	2.476	16.454	2.73236	9.79413e-28	8.75757e-27	hgo	PREDICTED: homogentisate 1,2-dioxygenase-like [Bactrocera dorsalis]	Metabolism;Metabolism	Global and overview maps;Amino acid metabolism	ko01100//Metabolic pathways;ko00350//Tyrosine metabolism	K00451;K00451	-	-	GO:0006558//L-phenylalanine metabolic process
LOC105231789	288	259	283	267	277	543	668	560	449	595	12.74	13.56	12.52	13.52	14.34	30.47	27.85	35.04	24.87	28.86	13.336	29.418	1.14137	9.82965e-28	8.78221e-27	PLPBP	PREDICTED: proline synthase co-transcribed bacterial homolog protein [Bactrocera dorsalis]	-	-	-	-	-	-	-
LOC105225370	447	275	276	272	285	51	124	39	57	74	11.76	8.56	7.26	8.19	8.77	1.7	3.07	1.45	1.88	2.13	8.908	2.046	-2.1223	9.98341e-28	8.91237e-27	Rbm28	PREDICTED: RNA-binding protein 28 [Bactrocera dorsalis]	Genetic Information Processing	Translation	ko03008//Ribosome biogenesis in eukaryotes	K14573	-	GO:0097159//organic cyclic compound binding	-
LOC105228169	542	447	618	465	443	186	243	191	204	235	20.75	20.25	23.64	20.36	19.84	9.03	8.76	10.34	9.77	9.86	20.968	9.552	-1.13431	1.12151e-27	9.98765e-27	--	PREDICTED: zinc finger protein 90 isoform X2 [Bactrocera dorsalis]	-	-	-	-	-	-	-
LOC105224020	35	26	29	26	18	115	109	88	102	135	0.9	0.79	0.75	0.77	0.54	3.76	2.65	3.21	3.29	3.82	0.75	3.346	2.15747	1.13104e-27	1.00563e-26	ARSJ	PREDICTED: arylsulfatase B [Bactrocera dorsalis]	-	-	-	-	-	GO:0016788//hydrolase activity, acting on ester bonds	-
LOC105227241	73	41	18	64	25	350	323	224	289	383	1.73	1.15	0.45	1.81	0.69	10.51	7.21	7.5	8.57	9.94	1.166	8.746	2.90706	1.5004e-27	1.33082e-26	--	GH12870 [Drosophila grimshawi]	-	-	-	-	-	GO:0016787//hydrolase activity;GO:0097367//carbohydrate derivative binding	GO:0006022//aminoglycan metabolic process;GO:0044238//primary metabolic process
LOC105227643	310	259	342	272	236	87	111	92	95	119	10	9.91	11.03	10.06	8.91	3.57	3.37	4.19	3.82	4.22	9.982	3.834	-1.38048	1.66418e-27	1.47491e-26	thoc7	PREDICTED: THO complex protein 7 [Bactrocera dorsalis]	Genetic Information Processing	Translation	ko03013//RNA transport	K13176	-	-	GO:0006396//RNA processing
LOC105222143	1	2	2	2	2	71	117	52	154	160	0.02	0.06	0.05	0.06	0.06	2.17	2.66	1.78	4.65	4.24	0.05	3.1	5.9542	1.76311e-27	1.56133e-26	--	PREDICTED: uncharacterized protein LOC105222143 [Bactrocera dorsalis]	-	-	-	-	-	-	-
LOC105228222	536	520	677	799	501	156	119	119	118	174	17.56	20.16	22.16	29.94	19.2	6.48	3.67	5.51	4.84	6.25	21.804	5.35	-2.02698	1.79894e-27	1.59113e-26	Act79B	PREDICTED: actin-5, muscle-specific [Bactrocera cucurbitae]	Organismal Systems;Human Diseases;Human Diseases;Human Diseases;Human Diseases;Cellular Processes;Cellular Processes;Environmental Information Processing;Environmental Information Processing;Organismal Systems;Organismal Systems;Cellular Processes;Cellular Processes;Cellular Processes;Environmental Information Processing;Human Diseases;Organismal Systems;Cellular Processes;Organismal Systems;Huma…	Environmental adaptation;Cancers;Cancers;Infectious diseases;Cardiovascular diseases;Transport and catabolism;Cellular community - eukaryotes;Signal transduction;Signal transduction;Endocrine system;Endocrine system;Cell motility;Cellular community - eukaryotes;Cell growth and death;Signal transduction;Infectious diseases;Immune system;Cellular community - eukaryotes;Digestive system;Infectious d…	ko04714//Thermogenesis;ko05205//Proteoglycans in cancer;ko05225//Hepatocellular carcinoma;ko05164//Influenza A;ko05418//Fluid shear stress and atherosclerosis;ko04145//Phagosome;ko04510//Focal adhesion;ko04390//Hippo signaling pathway;ko04015//Rap1 signaling pathway;ko04919//Thyroid hormone signaling pathway;ko04921//Oxytocin signaling pathway;ko04810//Regulation of actin cytoskeleton;ko04530//Ti…	K05692;K05692;K05692;K05692;K05692;K05692;K05692;K05692;K05692;K05692;K05692;K05692;K05692;K05692;K05692;K05692;K05692;K05692;K05692;K05692;K05692;K05692;K05692;K05692;K05692;K05692;K05692;K05692;K05692	GO:0015629//actin cytoskeleton	GO:0032550//purine ribonucleoside binding	GO:0006996//organelle organization
LOC105230684	2632	2067	2523	2215	2100	760	1543	667	813	801	25.22	23.43	24.16	24.28	23.54	9.23	13.93	9.04	9.75	8.41	24.126	10.072	-1.26024	1.92112e-27	1.69446e-26	-	-	-	-	-	-	-	-	-
LOC105231353	429	391	522	386	329	104	209	73	101	128	6.11	6.54	7.38	6.48	5.58	1.86	2.78	1.55	1.78	1.97	6.418	1.988	-1.69081	2.05108e-27	1.80619e-26	TARBP1	PREDICTED: probable methyltransferase TARBP1 isoform X4 [Bactrocera dorsalis]	-	-	-	-	-	GO:0003676//nucleic acid binding;GO:0008168//methyltransferase activity	GO:0010467//gene expression
LOC105222566	1291	952	1191	1001	1038	1799	2551	1555	2471	3107	50.32	43.91	46.4	44.64	47.34	88.93	93.67	85.7	120.54	132.74	46.522	104.316	1.16498	2.05545e-27	1.8086e-26	Surf4	PREDICTED: surfeit locus protein 4 homolog [Bactrocera dorsalis]	-	-	-	-	GO:0031224//intrinsic component of membrane;GO:0044444//cytoplasmic part	-	GO:0045168//cell-cell signaling involved in cell fate commitment
LOC105226964	655	623	749	634	571	1025	1333	894	1270	1551	13	14.63	14.86	14.39	13.26	25.8	24.92	25.09	31.54	33.74	14.028	28.218	1.00831	2.54838e-27	2.23698e-26	GalNAc-T2	PREDICTED: N-acetylgalactosaminyltransferase 7 [Bactrocera dorsalis]	Metabolism;Metabolism	Global and overview maps;Glycan biosynthesis and metabolism	ko01100//Metabolic pathways;ko00512//Mucin type O-glycan biosynthesis	K00710;K00710	GO:0031224//intrinsic component of membrane;GO:0043231//intracellular membrane-bounded organelle	GO:0016740//transferase activity;GO:0043169//cation binding	GO:0006464//cellular protein modification process
LOC105230897	354	266	373	334	330	103	93	76	113	123	7.49	6.53	7.6	7.9	8.3	2.72	1.8	2.42	2.95	2.86	7.564	2.55	-1.56865	3.91112e-27	3.4196e-26	SLC22A3	PREDICTED: solute carrier family 22 member 13 [Bactrocera dorsalis]	-	-	-	-	-	-	-
LOC105227875	38	29	32	25	15	87	135	90	125	132	1.16	1.05	0.98	0.88	0.54	3.38	3.9	3.9	4.79	4.43	0.922	4.08	2.14573	4.19079e-27	3.65832e-26	ACADSB	PREDICTED: short/branched chain specific acyl-CoA dehydrogenase, mitochondrial [Bactrocera dorsalis]	Metabolism;Metabolism;Metabolism;Metabolism	Global and overview maps;Global and overview maps;Lipid metabolism;Amino acid metabolism	ko01100//Metabolic pathways;ko01212//Fatty acid metabolism;ko00071//Fatty acid degradation;ko00280//Valine, leucine and isoleucine degradation	K09478;K09478;K09478;K09478	-	GO:0000166//nucleotide binding;GO:0016491//oxidoreductase activity	GO:0044710//single-organism metabolic process
LOC105229772	74	33	81	55	49	177	238	137	160	180	5.61	2.96	6.13	4.77	4.34	17	16.98	14.67	15.17	14.94	4.762	15.752	1.7259	5.3172e-27	4.63062e-26	--	PREDICTED: acanthoscurrin-2-like isoform X1 [Bactrocera dorsalis]	-	-	-	-	-	-	-
MSTRG.1502	0	5	0	2	1	84	95	63	72	117	0	0.66	0	0.25	0.13	11.83	9.94	9.9	10.01	14.25	0.208	11.186	5.74897	6.04713e-27	5.26215e-26	--	PREDICTED: uncharacterized protein LOC106616958 isoform X2 [Bactrocera oleae]	-	-	-	-	-	-	-
LOC105231363	1222	852	1159	981	996	317	671	274	363	414	16.25	13.4	15.39	14.92	15.49	5.34	8.4	5.15	6.03	6.03	15.09	6.19	-1.28558	6.33137e-27	5.50515e-26	Ech1	PREDICTED: chromodomain Y-like protein [Bactrocera dorsalis]	-	-	-	-	-	-	-
MSTRG.5383	124	100	139	126	112	231	294	205	273	255	6.37	6.08	7.14	7.41	6.73	15.05	14.23	14.89	17.55	14.36	6.746	15.216	1.17348	7.57564e-27	6.57668e-26	fabG	PREDICTED: 3-oxoacyl-[acyl-carrier-protein] reductase FabG-like [Bactrocera oleae]	-	-	-	-	-	GO:0003824//catalytic activity	GO:0044710//single-organism metabolic process
LOC105229271	456	393	466	399	384	712	1067	543	819	1179	17.7	18.05	18.08	17.72	17.44	35.04	39.01	29.8	39.78	50.15	17.798	38.756	1.1227	8.54176e-27	7.40957e-26	wol	PREDICTED: dolichyl-phosphate beta-glucosyltransferase [Bactrocera dorsalis]	Metabolism;Metabolism	Global and overview maps;Glycan biosynthesis and metabolism	ko01100//Metabolic pathways;ko00510//N-Glycan biosynthesis	K00729;K00729	GO:0043231//intracellular membrane-bounded organelle	GO:0016740//transferase activity	GO:0006486//protein glycosylation;GO:0006996//organelle organization;GO:0007043//cell-cell junction assembly;GO:0007389//pattern specification process;GO:0009790//embryo development;GO:0042335//cuticle development;GO:0044802//single-organism membrane organization
LOC105231356	17616	13658	17606	16217	14747	5791	10829	6159	5854	6435	909.36	834.31	908.37	957.73	890.75	379.11	526.59	449.54	378.19	364.07	900.104	419.5	-1.10142	8.80145e-27	7.62286e-26	--	RE53092p [Drosophila melanogaster]	-	-	-	-	-	-	-
LOC105223549	439	280	329	307	311	96	176	74	110	120	7.97	6.01	5.97	6.37	6.6	2.21	3.01	1.9	2.5	2.39	6.584	2.402	-1.45473	9.54956e-27	8.25782e-26	ESF1	PREDICTED: ESF1 homolog [Bactrocera dorsalis]	-	-	-	-	-	-	GO:0030154//cell differentiation
LOC105228433	277	206	266	241	235	79	130	58	87	102	2.95	2.6	2.84	2.94	2.93	1.07	1.31	0.87	1.16	1.19	2.852	1.12	-1.34848	9.90246e-27	8.54959e-26	mip120	PREDICTED: protein lin-54 homolog [Bactrocera dorsalis]	-	-	-	-	-	-	-
LOC105222285	1958	1267	1606	1466	1292	3078	3084	2179	3218	2955	257.17	196.92	210.82	220.28	198.56	512.69	381.57	404.66	528.96	425.37	216.75	450.65	1.05598	1.17677e-26	1.01283e-25	Trx-2	PREDICTED: thioredoxin-2-like [Bactrocera dorsalis]	Human Diseases;Organismal Systems	Cardiovascular diseases;Immune system	ko05418//Fluid shear stress and atherosclerosis;ko04621//NOD-like receptor signaling pathway	K03671;K03671	-	GO:0015036//disulfide oxidoreductase activity	GO:0019725//cellular homeostasis;GO:0044710//single-organism metabolic process
LOC105223088	1045	931	1009	941	867	1463	2203	1256	2026	2449	44.09	46.48	42.54	45.42	42.8	78.27	87.55	74.92	106.97	113.23	44.266	92.188	1.05838	1.29994e-26	1.1171e-25	Tusc3	PREDICTED: tumor suppressor candidate 3 [Bactrocera dorsalis]	Metabolism;Genetic Information Processing;Metabolism	Global and overview maps;Folding, sorting and degradation;Glycan biosynthesis and metabolism	ko01100//Metabolic pathways;ko04141//Protein processing in endoplasmic reticulum;ko00510//N-Glycan biosynthesis	K12669;K12669;K12669	-	-	-
LOC105227882	0	0	0	0	0	127	242	128	374	151	0	0	0	0	0	8.34	11.8	9.37	24.23	8.57	0.001	12.462	13.6052	1.4495e-26	1.24271e-25	SDR-1	PREDICTED: farnesol dehydrogenase-like [Bactrocera dorsalis]	Metabolism;Metabolism	Metabolism of terpenoids and polyketides;Metabolism of terpenoids and polyketides	ko00981//Insect hormone biosynthesis;ko00900//Terpenoid backbone biosynthesis	K15890;K15890	-	-	-
LOC105227487	7136	5316	6213	5266	5015	2009	4058	1836	2336	2841	140.24	124.12	120.89	117.51	115.12	50.03	76.66	53.21	57.87	62.64	123.576	60.082	-1.04039	1.56946e-26	1.34452e-25	nonA	PREDICTED: protein no-on-transient A-like isoform X1 [Bactrocera dorsalis]	-	-	-	-	-	-	-
LOC105233415	92	73	101	75	77	180	223	160	165	194	1.06	0.99	1.16	0.98	1.03	2.62	2.41	2.6	2.37	2.44	1.044	2.488	1.25286	1.57877e-26	1.35145e-25	ift122	Intraflagellar transport protein 122-like protein, partial [Bactrocera dorsalis]	-	-	-	-	-	-	-
LOC105231345	273	282	323	263	276	68	146	70	81	77	7.7	9.41	9.1	8.48	9.11	2.43	3.88	2.79	2.86	2.38	8.76	2.868	-1.61089	1.59064e-26	1.3595e-25	--	PREDICTED: myb-like protein Z [Ceratitis capitata]	-	-	-	-	-	-	-
LOC109579202	442	335	442	392	364	149	253	122	136	179	12.96	11.66	13.37	13.26	13	5.52	7.31	4.91	5.13	5.96	12.85	5.766	-1.15613	1.63115e-26	1.39304e-25	Snapc3	PREDICTED: snRNA-activating protein complex subunit 3 [Bactrocera dorsalis]	-	-	-	-	-	-	-
LOC105229589	167	114	167	129	126	231	358	230	241	288	6.57	5.31	6.56	5.79	5.8	11.52	13.26	12.79	11.86	12.41	6.006	12.368	1.04214	1.65595e-26	1.41313e-25	snk	PREDICTED: serine protease snake isoform X1 [Bactrocera dorsalis]	-	-	-	-	-	GO:0008233//peptidase activity	-
LOC105229527	129	119	116	135	69	1107	2544	698	1126	3743	4.5	4.91	4.04	5.38	2.81	48.93	83.52	34.4	49.11	142.98	4.328	71.788	4.05197	1.69199e-26	1.44277e-25	--	CG11892, partial [Drosophila yakuba]	-	-	-	-	-	GO:0016740//transferase activity	-
LOC105233649	344	248	314	285	289	112	163	97	122	127	4.15	3.54	3.79	3.94	4.08	1.71	1.85	1.66	1.84	1.68	3.9	1.748	-1.15777	1.75236e-26	1.49194e-25	--	PREDICTED: mucin-5AC isoform X1 [Bactrocera latifrons]	-	-	-	-	-	-	-
LOC105228471	76	48	71	57	67	158	195	148	160	244	1.48	1.11	1.38	1.27	1.53	3.91	3.58	4.08	3.9	5.21	1.354	4.136	1.61101	1.84425e-26	1.56775e-25	SPON2	PREDICTED: spondin-1 [Bactrocera dorsalis]	-	-	-	-	-	-	-
LOC105226083	251	181	250	242	200	489	617	441	728	915	9.38	8	9.34	10.35	8.74	23.17	21.72	23.3	34.05	37.47	9.162	27.942	1.6087	1.88517e-26	1.60131e-25	meigo	Solute carrier family 35 member B1-like protein, partial [Bactrocera dorsalis]	-	-	-	-	GO:0031090//organelle membrane;GO:0031224//intrinsic component of membrane	-	GO:0006486//protein glycosylation;GO:0033554//cellular response to stress;GO:0097485//neuron projection guidance
LOC105226503	802	526	592	543	573	121	313	118	126	163	11.88	9.22	8.77	9.2	9.93	2.27	4.37	2.47	2.34	2.65	9.8	2.82	-1.79709	2.0741e-26	1.76043e-25	Usp36	PREDICTED: ubiquitin carboxyl-terminal hydrolase 36 [Bactrocera dorsalis]	-	-	-	-	GO:0031981//nuclear lumen;GO:0043232//intracellular non-membrane-bounded organelle	GO:0036459//thiol-dependent ubiquitinyl hydrolase activity	GO:0002832//negative regulation of response to biotic stimulus;GO:0006915//apoptotic process;GO:0010720//positive regulation of cell development;GO:0016578//histone deubiquitination;GO:0031348//negative regulation of defense response;GO:0031935//regulation of chromatin silencing;GO:0042303//molting cycle
LOC105231744	397	324	408	367	330	114	230	105	129	150	10.72	10.29	11.01	11.26	10.32	3.9	5.85	3.98	4.34	4.44	10.72	4.502	-1.25167	2.24138e-26	1.89658e-25	Trmt11	PREDICTED: tRNA (guanine(10)-N2)-methyltransferase homolog [Bactrocera dorsalis]	-	-	-	-	-	GO:0016741//transferase activity, transferring one-carbon groups	GO:0008152//metabolic process
LOC105223066	19006	16354	20174	14907	19694	6040	11813	5560	6666	8276	291.48	296.81	309.25	261.66	353.59	117.45	170.78	120.6	127.97	139.09	302.558	135.178	-1.16235	2.26464e-26	1.91479e-25	unc-22	PREDICTED: twitchin [Bactrocera dorsalis]	-	-	-	-	-	-	-
LOC105222024	672	567	572	604	442	199	232	160	240	245	17.12	17.09	14.57	17.61	13.18	6.43	5.57	5.76	7.65	6.84	15.914	6.45	-1.30293	2.30655e-26	1.94724e-25	DDX56	PREDICTED: probable ATP-dependent RNA helicase DDX56 [Bactrocera dorsalis]	-	-	-	-	-	GO:0017111//nucleoside-triphosphatase activity;GO:0032550//purine ribonucleoside binding	-
LOC105226012	623	521	636	509	526	199	378	201	249	281	17.5	17.32	17.86	16.36	17.29	7.09	10	7.98	8.76	8.65	17.266	8.496	-1.02308	2.60091e-26	2.19239e-25	hflX	GH18978 [Drosophila grimshawi]	-	-	-	-	-	-	-
LOC105230545	38	42	45	60	33	163	201	116	242	189	2.98	3.9	3.53	5.38	3.03	16.21	14.85	12.86	23.75	16.24	3.764	16.782	2.15658	2.71988e-26	2.28918e-25	--	PREDICTED: uncharacterized protein LOC105230545 [Bactrocera dorsalis]	-	-	-	-	-	-	-
LOC105222952	659	557	668	552	548	171	376	164	190	262	14.93	14.93	15.12	14.31	14.53	4.91	8.02	5.25	5.39	6.5	14.764	6.014	-1.29569	2.97418e-26	2.4975e-25	--	PREDICTED: zinc finger protein 235 [Bactrocera dorsalis]	-	-	-	-	-	GO:0043169//cation binding	-
LOC105228596	966	803	885	855	765	1469	1855	1213	2101	1763	76.43	75.18	69.98	77.46	70.82	147.39	138.25	135.86	208.03	152.94	73.974	156.494	1.08102	3.00125e-26	2.51831e-25	Sec61gamma	PREDICTED: protein transport protein Sec61 gamma-2 subunit [Ceratitis capitata]	Genetic Information Processing;Cellular Processes;Human Diseases;Genetic Information Processing	Folding, sorting and degradation;Transport and catabolism;Infectious diseases;Folding, sorting and degradation	ko04141//Protein processing in endoplasmic reticulum;ko04145//Phagosome;ko05110//Vibrio cholerae infection;ko03060//Protein export	K07342;K07342;K07342;K07342	GO:0071256//translocon complex	GO:0008320//protein transmembrane transporter activity	GO:0010506//regulation of autophagy;GO:0030154//cell differentiation;GO:0065002//intracellular protein transmembrane transport
LOC105231440	7	11	12	9	10	81	92	39	86	102	0.11	0.21	0.19	0.16	0.19	1.64	1.39	0.88	1.72	1.79	0.172	1.484	3.10901	3.31611e-26	2.77407e-25	--	dusky-like, isoform A [Drosophila melanogaster]	-	-	-	-	-	-	-
LOC105227895	506	481	514	465	442	732	995	798	1028	1081	15.37	17.34	15.69	16.18	15.8	28.08	28.31	34.06	38.64	35.67	16.076	32.952	1.03546	3.42374e-26	2.86193e-25	QPCT	PREDICTED: glutaminyl-peptide cyclotransferase isoform X1 [Bactrocera dorsalis]	-	-	-	-	GO:0043231//intracellular membrane-bounded organelle	GO:0016755//transferase activity, transferring amino-acyl groups	GO:0018199//peptidyl-glutamine modification
LOC105226238	2047	1967	2106	1869	1466	3094	5602	3349	5886	5845	56.38	64.11	57.98	58.89	47.25	108.08	145.35	130.43	202.9	176.45	56.922	152.642	1.42309	3.98325e-26	3.32711e-25	slc17a8	PREDICTED: putative inorganic phosphate cotransporter [Bactrocera dorsalis]	-	-	-	-	-	-	-
LOC105223061	2173	1893	2202	2070	2171	783	1217	728	562	800	103.37	106.56	104.69	112.65	120.84	47.24	54.53	48.96	33.46	41.71	109.622	45.18	-1.27878	4.32934e-26	3.61346e-25	--	GL11540 [Drosophila persimilis]	-	-	-	-	-	-	-
LOC105227279	23	31	28	35	32	109	162	78	149	188	0.61	0.98	0.75	1.07	1	3.69	4.07	2.94	4.98	5.5	0.882	4.236	2.26385	4.47915e-26	3.73567e-25	-	-	-	-	-	-	-	-	-
LOC105222108	262	235	230	275	228	66	120	53	73	96	8.04	8.54	7.06	9.66	8.19	2.57	3.47	2.3	2.8	3.23	8.298	2.874	-1.5297	4.82093e-26	4.01769e-25	--	PREDICTED: eIF-2-alpha kinase activator GCN1-like [Bactrocera dorsalis]	-	-	-	-	-	-	-
MSTRG.2189	282	148	218	187	222	55	72	30	49	57	2.51	1.56	1.94	1.91	2.32	0.62	0.6	0.38	0.55	0.56	2.048	0.542	-1.91785	4.91922e-26	4.0965e-25	Insrr	PREDICTED: receptor-type guanylate cyclase gcy-8-like [Bactrocera latifrons]	-	-	-	-	GO:0016021//integral component of membrane;GO:0043231//intracellular membrane-bounded organelle;GO:0043235//receptor complex;GO:0044444//cytoplasmic part;GO:0044459//plasma membrane part	GO:0004714//transmembrane receptor protein tyrosine kinase activity;GO:0004869//cysteine-type endopeptidase inhibitor activity;GO:0005102//receptor binding;GO:0005504//fatty acid binding;GO:0005520//insulin-like growth factor binding;GO:0019901//protein kinase binding;GO:0019902//phosphatase binding;GO:0019904//protein domain specific binding;GO:0032550//purine ribonucleoside binding	GO:0002009//morphogenesis of an epithelium;GO:0007088//regulation of mitotic nuclear division;GO:0007169//transmembrane receptor protein tyrosine kinase signaling pathway;GO:0007530//sex determination;GO:0009746//response to hexose;GO:0009792//embryo development ending in birth or egg hatching;GO:0009887//organ morphogenesis;GO:0009991//response to extracellular stimulus;GO:0010038//response to m…
LOC105222184	230	127	126	187	127	439	529	288	453	546	16.31	10.66	8.93	15.17	10.54	39.48	35.34	28.88	40.2	42.64	12.322	37.308	1.59825	6.44177e-26	5.34023e-25	--	PREDICTED: thymosin beta [Bactrocera dorsalis]	-	-	-	-	GO:0044444//cytoplasmic part	GO:0003779//actin binding	GO:0009886//post-embryonic morphogenesis;GO:0030036//actin cytoskeleton organization
LOC105228893	351	200	204	282	204	728	877	454	940	1154	13.55	9.14	7.87	12.46	9.22	35.65	31.9	24.79	45.42	48.84	10.448	37.32	1.83672	6.61108e-26	5.47648e-25	SLC26A11	Sodium-independent sulfate anion transporter [Bactrocera dorsalis]	-	-	-	-	GO:0031224//intrinsic component of membrane	GO:0015103//inorganic anion transmembrane transporter activity	GO:0008272//sulfate transport;GO:0044763//single-organism cellular process
LOC105230854	357	253	292	261	234	67	138	67	68	112	10.66	8.91	8.66	9.01	8.12	2.55	3.86	2.81	2.52	3.64	9.072	3.076	-1.56037	6.87045e-26	5.68707e-25	Sry-delta	PREDICTED: serendipity locus protein delta-like [Bactrocera dorsalis]	-	-	-	-	GO:0005700//polytene chromosome	GO:0000982//transcription factor activity, RNA polymerase II core promoter proximal region sequence-specific binding;GO:0003676//nucleic acid binding	GO:0000578//embryonic axis specification;GO:0006357//regulation of transcription from RNA polymerase II promoter;GO:0007281//germ cell development
LOC105228534	44	30	26	22	29	144	149	74	153	178	2.02	1.63	1.19	1.15	1.56	8.37	6.44	4.8	8.78	8.94	1.51	7.466	2.30579	7.69437e-26	6.35953e-25	GILT1	PREDICTED: gamma-interferon-inducible lysosomal thiol reductase isoform X2 [Bactrocera dorsalis]	-	-	-	-	-	-	-
LOC105227437	468	613	308	599	403	66	102	66	34	93	16.33	25.32	10.74	23.92	16.46	2.92	3.35	3.26	1.48	3.56	18.554	2.914	-2.67066	7.7084e-26	6.36635e-25	-	-	-	-	-	-	-	-	-
LOC105228342	8	9	8	7	7	49	114	63	128	185	0.39	0.52	0.39	0.39	0.4	3.03	5.24	4.35	7.82	9.9	0.418	6.068	3.85965	8.44973e-26	6.96818e-25	GBA3	PREDICTED: myrosinase 1-like [Bactrocera dorsalis]	-	-	-	-	-	-	-
LOC105222853	389	256	340	311	256	626	673	507	756	871	14.13	11	12.34	12.92	10.88	28.84	23.03	26.04	34.37	34.68	12.254	29.392	1.26217	8.70572e-26	7.17393e-25	FPR2	PREDICTED: FK506-binding protein 2 isoform X2 [Bactrocera latifrons]	-	-	-	-	GO:0043231//intracellular membrane-bounded organelle;GO:0044421//extracellular region part	GO:0005527//macrolide binding	GO:0002118//aggressive behavior;GO:0007219//Notch signaling pathway;GO:0007423//sensory organ development;GO:0009886//post-embryonic morphogenesis;GO:0019725//cellular homeostasis;GO:0035295//tube development;GO:0044267//cellular protein metabolic process
LOC105221932	6	2	3	3	1	97	49	70	124	132	0.07	0.03	0.04	0.04	0.01	1.5	0.56	1.21	1.9	1.77	0.038	1.388	5.19086	9.48951e-26	7.81398e-25	--	PREDICTED: keratin, type II cytoskeletal 1b [Bactrocera latifrons]	-	-	-	-	-	-	-
LOC105232494	45	24	26	29	25	161	152	76	173	208	2.71	1.71	1.56	2	1.76	12.29	8.62	6.47	13.03	13.72	1.948	10.826	2.47443	1.07685e-25	8.86052e-25	--	PREDICTED: general odorant-binding protein 99a [Bactrocera dorsalis]	-	-	-	-	-	-	-
LOC105222322	1042	818	956	799	897	210	514	189	303	272	15.26	14.18	13.99	13.39	15.37	3.9	7.09	3.91	5.55	4.37	14.438	4.964	-1.5403	1.11277e-25	9.14929e-25	Iswi	PREDICTED: chromatin-remodeling complex ATPase chain Iswi [Bactrocera dorsalis]	-	-	-	-	GO:0031010//ISWI-type complex	GO:0003676//nucleic acid binding;GO:0003682//chromatin binding;GO:0017111//nucleoside-triphosphatase activity;GO:0032550//purine ribonucleoside binding	GO:0006338//chromatin remodeling
LOC105224794	630	381	550	377	446	135	241	111	130	126	17.39	12.44	15.17	11.9	14.4	4.73	6.27	4.33	4.49	3.81	14.26	4.726	-1.59328	1.15735e-25	9.50343e-25	-	-	-	-	-	-	-	-	-
LOC105224793	259	179	214	242	185	50	68	43	32	25	4.13	3.41	3.45	4.48	3.34	1.03	1.07	0.94	0.66	0.41	3.762	0.822	-2.19429	1.24766e-25	1.02354e-24	--	GH14520 [Drosophila grimshawi]	-	-	-	-	-	-	-
LOC105225650	2009	1595	1768	1526	1464	521	1116	445	626	717	13.99	13.15	12.31	12.16	11.93	4.6	7.32	4.38	5.46	5.47	12.708	5.446	-1.22247	1.6105e-25	1.31631e-24	Chd1	PREDICTED: chromodomain-helicase-DNA-binding protein 1 [Bactrocera dorsalis]	-	-	-	-	GO:0043231//intracellular membrane-bounded organelle	GO:0003676//nucleic acid binding;GO:0005515//protein binding;GO:0032550//purine ribonucleoside binding;GO:0042623//ATPase activity, coupled	-
LOC105222225	37	49	43	51	43	139	166	108	110	159	1.18	1.84	1.37	1.86	1.6	5.61	4.98	4.86	4.38	5.54	1.57	5.074	1.69236	1.62598e-25	1.32799e-24	grass	PREDICTED: serine protease 7 isoform X2 [Bactrocera dorsalis]	-	-	-	-	-	-	-
LOC105224583	11	8	4	7	3	58	134	51	67	63	0.21	0.18	0.08	0.15	0.07	1.41	2.43	1.39	1.61	1.33	0.138	1.634	3.56567	1.93415e-25	1.57851e-24	Ermp1	PREDICTED: endoplasmic reticulum metallopeptidase 1 [Bactrocera dorsalis]	-	-	-	-	-	-	-
LOC105228616	289	262	331	290	293	115	163	91	101	123	13.14	14.09	15.04	15.08	15.59	6.63	6.98	5.85	5.75	6.13	14.588	6.268	-1.21871	2.33897e-25	1.90045e-24	--	PREDICTED: uncharacterized protein LOC105228616 [Bactrocera dorsalis]	-	-	-	-	-	-	-
LOC105233622	53	30	58	26	48	187	260	125	119	183	1.29	0.86	1.41	0.72	1.37	5.77	5.96	4.3	3.62	4.88	1.13	4.906	2.11822	2.43767e-25	1.97774e-24	-	-	-	-	-	-	-	-	-
LOC105234069	37	21	24	18	18	83	170	132	93	119	4.32	2.9	2.8	2.4	2.46	12.28	18.69	21.78	13.58	15.22	2.976	16.31	2.45431	2.45716e-25	1.99208e-24	-	-	-	-	-	-	-	-	-
LOC105229287	528	416	549	451	463	147	297	111	146	190	8.54	7.97	8.88	8.35	8.77	3.02	4.53	2.54	2.96	3.37	8.502	3.284	-1.37235	2.50629e-25	2.03043e-24	-	-	-	-	-	-	-	-	-
LOC115065996	14	2	2	8	6	64	185	65	186	248	0.64	0.11	0.09	0.42	0.32	3.69	7.92	4.17	10.57	12.35	0.316	7.74	4.61434	2.61178e-25	2.11124e-24	--	PREDICTED: uncharacterized protein LOC105217505 [Bactrocera cucurbitae]	-	-	-	-	-	-	-
LOC105231178	398	322	199	331	121	1905	1961	1512	1783	1948	15.12	14.47	7.55	14.38	5.38	91.76	70.16	81.2	84.75	81.09	11.38	81.792	2.84546	2.70498e-25	2.18338e-24	Acp1	PREDICTED: adult cuticle protein 1-like [Bactrocera dorsalis]	-	-	-	-	-	-	-
LOC105233897	92	72	60	87	68	232	261	179	238	182	2.81	2.75	1.94	3.22	2.21	9.06	7.45	7.92	9.26	6.41	2.586	8.02	1.63288	2.82353e-25	2.27574e-24	opa3	PREDICTED: optic atrophy 3 protein homolog isoform X2 [Bactrocera latifrons]	-	-	-	-	GO:0043231//intracellular membrane-bounded organelle	GO:0000989//transcription factor activity, transcription factor binding;GO:0003824//catalytic activity	GO:0000154//rRNA modification;GO:0000959//mitochondrial RNA metabolic process;GO:0010468//regulation of gene expression
LOC105231589	230	177	239	239	161	50	92	38	57	48	2.59	2.48	2.69	3.27	2.03	0.72	1.03	0.57	0.7	0.6	2.612	0.724	-1.85109	3.34982e-25	2.69598e-24	FGF	PREDICTED: micronuclear linker histone polyprotein isoform X1 [Bactrocera dorsalis]	-	-	-	-	-	-	-
LOC105224669	333	272	305	236	269	102	135	93	107	94	4.01	3.87	3.67	3.25	3.79	1.56	1.53	1.58	1.61	1.24	3.718	1.504	-1.30572	3.42103e-25	2.75129e-24	-	-	-	-	-	-	-	-	-
LOC105226538	102	96	91	76	78	172	245	188	194	202	3.89	4.33	3.47	3.32	3.48	8.32	8.8	10.14	9.26	8.44	3.698	8.992	1.2819	4.28833e-25	3.43877e-24	fabG	3-oxoacyl-(acyl-carrier-protein) reductase FabG [Bactrocera dorsalis]	-	-	-	-	-	-	-
LOC105225286	142	131	136	148	119	285	331	245	280	258	4.23	4.58	4.04	5	4.19	10.73	9.36	10.52	10.38	8.39	4.408	9.876	1.1638	4.68768e-25	3.74811e-24	TMEM267	PREDICTED: transmembrane protein 267 [Bactrocera dorsalis]	-	-	-	-	-	-	-
LOC105233717	1430	1140	1437	1032	1247	371	797	329	374	491	10.22	9.64	10.26	8.43	10.42	3.36	5.36	3.32	3.34	3.84	9.794	3.844	-1.34929	4.86171e-25	3.88163e-24	--	PREDICTED: trichohyalin isoform X1 [Bactrocera latifrons]	-	-	-	-	-	-	-
LOC105222433	413	383	394	408	368	142	234	110	177	171	9.13	10.02	8.71	10.32	9.52	3.98	4.87	3.44	4.9	4.14	9.54	4.266	-1.16111	4.93055e-25	3.9309e-24	PHAX	PREDICTED: phosphorylated adapter RNA export protein [Bactrocera dorsalis]	Genetic Information Processing	Translation	ko03013//RNA transport	K14291	-	-	-
LOC105232638	23	17	10	14	11	109	90	85	76	89	1.34	1.17	0.58	0.93	0.75	8.05	4.94	7	5.54	5.68	0.954	6.242	2.70995	5.58754e-25	4.44506e-24	--	PREDICTED: probable transcription-associated protein 1 [Ceratitis capitata]	-	-	-	-	GO:0044391//ribosomal subunit	GO:0005198//structural molecule activity	GO:0010467//gene expression
LOC105229367	100	75	79	78	66	160	245	161	205	173	0.98	0.87	0.77	0.87	0.76	1.99	2.26	2.23	2.51	1.86	0.85	2.17	1.35216	6.08285e-25	4.82865e-24	-	-	-	-	-	-	-	-	-
LOC105229210	248	193	210	214	186	65	92	72	71	75	23.42	21.59	19.84	23.15	20.55	7.79	8.19	9.63	8.4	7.77	21.71	8.356	-1.37748	6.47537e-25	5.13654e-24	--	GM26680 [Drosophila sechellia]	-	-	-	-	-	-	-
LOC105226622	29	25	51	33	28	110	151	153	204	227	0.49	0.47	0.81	0.63	0.53	2.26	2.18	3.39	3.84	3.77	0.586	3.088	2.3977	6.56531e-25	5.20414e-24	Oct-TyrR	PREDICTED: tyramine receptor 1 [Bactrocera oleae]	-	-	-	-	-	-	GO:0007165//signal transduction
LOC105234004	1873	1479	1535	1673	1125	536	468	353	433	662	21.57	20.15	17.67	22.04	15.16	7.83	5.08	5.75	6.24	8.35	19.318	6.65	-1.53852	7.6943e-25	6.09031e-24	-	-	-	-	-	-	-	-	-
LOC105221867	8	6	3	2	0	214	422	167	646	999	0.57	0.5	0.21	0.16	0	19.22	28.15	16.72	57.25	77.54	0.288	39.776	7.10969	8.14329e-25	6.43646e-24	Angptl3	PREDICTED: angiopoietin-2-like [Bactrocera dorsalis]	-	-	-	-	-	-	-
LOC105223620	28	59	62	44	61	189	248	162	168	192	1.13	2.81	2.49	2.02	2.87	9.63	9.39	9.2	8.45	8.46	2.264	9.026	1.99521	9.15479e-25	7.2256e-24	--	PREDICTED: keratin, type I cytoskeletal 10 [Bactrocera dorsalis]	-	-	-	-	-	-	-
LOC105222896	393	334	320	348	333	134	151	111	145	127	11.15	11.21	9.07	11.29	11.05	4.82	4.03	4.45	5.15	3.95	10.754	4.48	-1.2633	1.01769e-24	8.01513e-24	Reg-5	PREDICTED: rhythmically expressed gene 5 protein [Bactrocera dorsalis]	-	-	-	-	-	-	-
LOC105227141	0	0	0	0	0	115	210	97	96	115	0	0	0	0	0	6.11	8.29	5.75	5.06	5.28	0.001	6.098	12.5741	1.0246e-24	8.06383e-24	Lipg	PREDICTED: endothelial lipase [Bactrocera dorsalis]	-	-	-	-	-	GO:0004620//phospholipase activity	GO:0044238//primary metabolic process
LOC105222343	217	181	232	190	171	54	97	36	60	76	4.79	4.69	5.07	4.79	4.39	1.49	2	1.11	1.64	1.83	4.746	1.614	-1.55607	1.02627e-24	8.07122e-24	--	PREDICTED: zinc finger protein 878 isoform X1 [Bactrocera dorsalis]	-	-	-	-	-	-	-
LOC105227372	539	487	641	470	440	156	307	140	159	231	8.86	9.46	10.58	8.88	8.53	3.25	4.8	3.25	3.31	4.19	9.262	3.76	-1.30059	1.16443e-24	9.13819e-24	CG6379	PREDICTED: cap-specific mRNA (nucleoside-2'-O-)-methyltransferase 1 [Bactrocera dorsalis]	-	-	-	-	-	GO:0008168//methyltransferase activity	GO:0016071//mRNA metabolic process;GO:0032259//methylation
LOC105229599	33	24	29	11	25	83	128	84	128	123	0.81	0.69	0.71	0.31	0.71	2.57	2.95	2.9	3.91	3.29	0.646	3.124	2.27379	1.17687e-24	9.22927e-24	Myorg	PREDICTED: uncharacterized family 31 glucosidase KIAA1161 [Bactrocera dorsalis]	-	-	-	-	GO:0043234//protein complex	GO:0016798//hydrolase activity, acting on glycosyl bonds	GO:0044238//primary metabolic process
LOC105229338	213	188	265	175	197	42	83	59	49	68	5.5	5.76	6.84	5.18	5.96	1.37	2.03	2.17	1.58	1.93	5.848	1.816	-1.68718	1.22661e-24	9.61254e-24	--	PREDICTED: protein CROWDED NUCLEI 1 isoform X1 [Bactrocera oleae]	-	-	-	-	-	-	-
LOC105230679	528	420	491	495	425	208	298	129	181	198	31.38	29.53	29.17	33.68	29.58	15.71	16.71	10.84	13.48	12.89	30.668	13.926	-1.13895	1.42122e-24	1.11139e-23	YRDC	PREDICTED: yrdC domain-containing protein, mitochondrial [Bactrocera dorsalis]	-	-	-	-	-	GO:0003723//RNA binding;GO:0046872//metal ion binding	GO:0010467//gene expression;GO:0034645//cellular macromolecule biosynthetic process
LOC105232645	33	35	32	28	47	142	172	87	155	122	0.99	1.25	0.96	0.96	1.66	5.42	4.88	3.7	5.84	4.03	1.164	4.774	2.03611	1.5659e-24	1.2228e-23	vanin-like	PREDICTED: vanin-like protein 1 [Bactrocera dorsalis]	Metabolism;Organismal Systems;Metabolism	Global and overview maps;Digestive system;Metabolism of cofactors and vitamins	ko01100//Metabolic pathways;ko04977//Vitamin digestion and absorption;ko00780//Biotin metabolism	K01435;K01435;K01435	-	-	-
LOC105232327	269	241	258	300	250	450	687	389	648	736	15.36	16.28	14.72	19.6	16.7	32.58	36.95	31.4	46.3	46.05	16.532	38.656	1.22543	2.08027e-24	1.61988e-23	CG10166	PREDICTED: probable dolichol-phosphate mannosyltransferase [Bactrocera dorsalis]	Metabolism;Metabolism	Global and overview maps;Glycan biosynthesis and metabolism	ko01100//Metabolic pathways;ko00510//N-Glycan biosynthesis	K00721;K00721	-	GO:0016740//transferase activity	-
LOC105230958	1534	1244	1349	1211	1158	480	910	407	452	652	20.53	19.69	18.04	18.54	18.13	8.15	11.47	7.7	7.58	9.56	18.986	8.892	-1.09436	2.08687e-24	1.62387e-23	psidin	PREDICTED: phagocyte signaling-impaired protein [Bactrocera dorsalis]	-	-	-	-	-	-	-
LOC105223093	33334	29462	37094	26787	27868	12648	15270	13205	11905	12432	746.86	781.14	830.67	686.63	730.6	359.38	322.29	418.33	333.82	305.28	755.18	347.82	-1.11848	2.24692e-24	1.74595e-23	--	GH10175 [Drosophila grimshawi]	-	-	-	-	-	-	-
LOC105224572	71	38	49	63	41	164	191	136	128	153	1.58	1	1.09	1.6	1.07	4.62	3.99	4.27	3.56	3.72	1.268	4.032	1.66894	2.35342e-24	1.82614e-23	-	-	-	-	-	-	-	-	-
LOC105234011	277	189	187	228	221	34	42	28	38	78	3.22	2.6	2.17	3.03	3.01	0.5	0.46	0.46	0.55	0.99	2.806	0.592	-2.24485	2.421e-24	1.87726e-23	PPAF2	Serine proteinase stubble [Bactrocera dorsalis]	-	-	-	-	-	GO:0004175//endopeptidase activity	GO:0019538//protein metabolic process
LOC105227588	22	27	14	17	28	219	164	86	134	122	0.21	0.3	0.13	0.18	0.31	2.6	1.45	1.14	1.57	1.25	0.226	1.602	2.82548	2.63057e-24	2.03689e-23	TG	Papilin [Bactrocera dorsalis]	-	-	-	-	-	GO:0004866//endopeptidase inhibitor activity	GO:0010466//negative regulation of peptidase activity
LOC105230113	105	83	118	79	103	198	248	181	184	237	2.33	2.18	2.61	2	2.67	5.57	5.18	5.67	5.1	5.76	2.358	5.456	1.21028	2.71258e-24	2.09745e-23	-	-	-	-	-	-	-	-	-
LOC105226794	139	119	132	115	112	192	290	198	246	256	9.54	9.66	9.05	9.03	8.99	16.71	18.75	19.21	21.13	19.26	9.254	19.012	1.03876	2.92682e-24	2.25994e-23	Alg13	PREDICTED: UDP-N-acetylglucosamine transferase subunit ALG13 homolog [Bactrocera dorsalis]	Metabolism;Metabolism	Global and overview maps;Glycan biosynthesis and metabolism	ko01100//Metabolic pathways;ko00510//N-Glycan biosynthesis	K07432;K07432	-	-	-
LOC105226071	43	63	38	50	41	162	196	101	145	197	1.12	1.83	0.93	1.4	1.21	5.33	4.7	3.55	4.46	5.44	1.298	4.696	1.85514	2.92978e-24	2.26065e-23	SLC15A2	PREDICTED: peptide transporter family 1 [Bactrocera dorsalis]	-	-	-	-	GO:0016020//membrane	-	GO:0006810//transport
LOC105233798	19	6	22	41	24	408	1269	1879	4692	4015	1	0.37	1.15	2.46	1.48	27.15	62.85	139.31	308.68	231.21	1.292	153.84	6.89568	2.99279e-24	2.30765e-23	--	PREDICTED: uncharacterized protein LOC105233798 isoform X1 [Bactrocera dorsalis]	-	-	-	-	-	-	-
LOC105231180	541	319	338	274	53	5424	7273	4073	5497	6529	32.02	22.34	19.99	18.55	3.67	407.11	405.49	340.84	407.16	423.51	19.314	396.822	4.36077	3.48445e-24	2.68488e-23	Acp1	PREDICTED: adult cuticle protein 1-like [Bactrocera dorsalis]	-	-	-	-	-	-	-
LOC105231286	26	23	19	23	20	101	105	60	129	121	1.55	1.62	1.13	1.57	1.39	7.63	5.89	5.05	9.62	7.9	1.452	7.218	2.31356	3.66778e-24	2.82416e-23	PGRP-SD	PREDICTED: peptidoglycan-recognition protein SD [Bactrocera dorsalis]	Organismal Systems	Immune system	ko04624//Toll and Imd signaling pathway	K01446	GO:0005887//integral component of plasma membrane	GO:0005515//protein binding;GO:0005539//glycosaminoglycan binding;GO:0008329//signaling pattern recognition receptor activity;GO:0015197//peptide transporter activity	GO:0002803//positive regulation of antibacterial peptide production;GO:0002813//regulation of biosynthetic process of antibacterial peptides active against Gram-negative bacteria;GO:0006897//endocytosis;GO:0007166//cell surface receptor signaling pathway
LOC105222450	2899	2378	3797	2586	3308	1081	1734	786	1077	1284	39.81	38.64	52.12	40.63	53.16	18.83	22.43	15.26	18.51	19.33	44.872	18.872	-1.24957	3.88943e-24	2.98858e-23	-	-	-	-	-	-	-	-	-
LOC105223232	9	14	2	6	0	329	376	204	177	262	0.28	0.52	0.06	0.21	0	13.03	11.06	9.01	6.92	8.97	0.214	9.798	5.5168	3.89224e-24	2.98865e-23	--	PREDICTED: uncharacterized protein LOC105223232 [Bactrocera dorsalis]	-	-	-	-	-	-	-
LOC105225761	24	25	17	22	6	161	174	133	80	118	0.6	0.74	0.42	0.63	0.18	5.11	4.1	4.7	2.5	3.23	0.514	3.928	2.93395	4.21071e-24	3.23094e-23	gd	PREDICTED: serine protease easter [Bactrocera dorsalis]	-	-	-	-	-	-	-
LOC105224529	160	109	181	109	111	282	406	196	275	314	1.71	1.38	1.93	1.33	1.39	3.82	4.09	2.96	3.68	3.68	1.548	3.646	1.23591	4.23854e-24	3.25004e-23	NCAPD2	PREDICTED: condensin complex subunit 1 [Bactrocera dorsalis]	-	-	-	-	-	-	GO:0000280//nuclear division;GO:0022402//cell cycle process;GO:0051276//chromosome organization
LOC105230547	306	237	322	332	274	115	132	87	85	122	2.65	2.49	2.95	3.31	2.91	1.26	1.13	1.11	0.95	1.22	2.862	1.134	-1.3356	4.39263e-24	3.36352e-23	--	PREDICTED: transcription factor mef2A isoform X2 [Drosophila arizonae]	-	-	-	-	GO:0044448//cell cortex part	-	GO:0001736//establishment of planar polarity;GO:0065008//regulation of biological quality
LOC105232908	410	313	317	291	312	70	170	57	91	81	8.98	8.11	6.94	7.29	7.99	1.94	3.51	1.76	2.49	1.94	7.862	2.328	-1.75581	4.68882e-24	3.58783e-23	Ptcd1	PREDICTED: pentatricopeptide repeat-containing protein 1, mitochondrial [Bactrocera dorsalis]	-	-	-	-	-	-	-
LOC115065702	368	319	371	344	332	135	206	130	134	190	7.98	8.28	7.99	8.61	8.45	3.74	4.21	3.99	3.66	4.56	8.262	4.032	-1.035	5.13258e-24	3.91923e-23	--	PREDICTED: protein prenyltransferase alpha subunit repeat-containing protein 1 isoform X1 [Bactrocera dorsalis]	-	-	-	-	GO:0044444//cytoplasmic part	GO:0004661//protein geranylgeranyltransferase activity	GO:0018342//protein prenylation;GO:0044767//single-organism developmental process
[truncated: 1,550 more rows]

## Sheet: 0d vs 6d
id	Rect-0d-1_count	Rect-0d-2_count	Rect-0d-3_count	Rect-0d-4_count	Rect-0d-5_count	Rect-6d-1_count	Rect-6d-2_count	Rect-6d-3_count	Rect-6d-4_count	Rect-6d-5_count	Rect-0d-1_fpkm	Rect-0d-2_fpkm	Rect-0d-3_fpkm	Rect-0d-4_fpkm	Rect-0d-5_fpkm	Rect-6d-1_fpkm	Rect-6d-2_fpkm	Rect-6d-3_fpkm	Rect-6d-4_fpkm	Rect-6d-5_fpkm	Rect-0d_mean	Rect-6d_mean	log2(fc)	PValue	FDR	Symbol	Description	KEGG_A_class	KEGG_B_class	Pathway	K_ID	GO Component	GO Function	GO Process
[truncated: 2,650 more rows]

[truncated: 2 more sheets: 0d vs 9d, 0d vs 12d]
