# Supplementary material for: Protein feeding mediates sex pheromone biosynthesis in an insect
Source: eLife. 2023 Jan 19;12:e83469. doi: 10.7554/eLife.83469 (PMC9908074; doi:10.7554/eLife.83469)
Supplement: Supplementary file 8. [file elife-83469-supp8.xlsx]

## Sheet: Rect-0d-vs-Rect-3d.path
KEGG_A_class	KEGG_B_class	Pathway	Rect-0d-vs-Rect-3d (594)	All (3263)	Pvalue	Qvalue	Pathway ID	Genes	K_IDs
Genetic Information Processing	Translation	Ribosome biogenesis in eukaryotes	39	66	8.34783e-14	2.62957e-11	ko03008	LOC105221856(REXO5);LOC105222115(wcd);LOC105222200(utp15);LOC105222326(TBL3);LOC105222593(PWP2);LOC105222801(Rrp7a);LOC105222975(Rtc1);LOC105223080(Ns1);LOC105223175(l(1)G0020);LOC105223338(Mat89Ba);LOC105224190(Rpp30);LOC105224199(--);LOC105224702(Nop60B);LOC105224740(POP1);LOC105224742(RIOK1);LOC105224868(BMS1);LOC105225104(Ak6);LOC105225240(Utp14a);LOC105225370(Rbm28);LOC105225430(MDN1);LOC105…	K14570+K14553+K14549+K14555+K14558+K14545+K11108+K14538+K14521+K14544+K03539+K14552+K11131+K01164+K07178+K14569+K18532+K14567+K14573+K14572+K11883+K14557+K12845+K14548+K14550+K14570+K14546+K14563+K14559+K11129+K11130+K14554+K14556+K14566+K14568+K13288+K14564+K14565+K11128
Metabolism	Xenobiotics biodegradation and metabolism	Drug metabolism - cytochrome P450	25	57	5.61275e-06	0.000884009	ko00982	LOC105222104(GstD1);LOC105224360(MGST1);LOC105224876(Ugt1a2);LOC105225812(GST1);LOC105225813(GstD1);LOC105225817(GstD1);LOC105225994(Gst4);LOC105226110(Ugt2a2);LOC105227725(GST1);LOC105228691(GstS1);LOC105229681(GST1);LOC105229689(GST1);LOC105229690(GstD1);LOC105230325(ugt3);LOC105230804(UGT2B13);LOC105230828(UGT2B13);LOC105231237(UGT2B15);LOC105232212(--);LOC105232983(Adh);LOC105232985(Adh);LOC1…	K00799+K00799+K00699+K00799+K00799+K00799+K00799+K00699+K00799+K04097+K00799+K00799+K00799+K00699+K00699+K00699+K00699+K00699+K00001+K00001+K00799+K00799+K00699+K00699+K00799
Metabolism	Xenobiotics biodegradation and metabolism	Drug metabolism - other enzymes	32	84	1.08837e-05	0.00114278	ko00983	LOC105222104(GstD1);LOC105223311(AAO2);LOC105223314(AAO2);LOC105224360(MGST1);LOC105224876(Ugt1a2);LOC105225087(RnrL);LOC105225812(GST1);LOC105225813(GstD1);LOC105225817(GstD1);LOC105225994(Gst4);LOC105226045(UPP1);LOC105226110(Ugt2a2);LOC105227725(GST1);LOC105228870(DUT);LOC105229681(GST1);LOC105229689(GST1);LOC105229690(GstD1);LOC105230325(ugt3);LOC105230804(UGT2B13);LOC105230828(UGT2B13);LOC10…	K00799+K00106+K00106+K00799+K00699+K10807+K00799+K00799+K00799+K00799+K00757+K00699+K00799+K01520+K00799+K00799+K00799+K00699+K00699+K00699+K00106+K00757+K00699+K13421+K00699+K00757+K00799+K00799+K00699+K00699+K03927+K00799
Metabolism	Xenobiotics biodegradation and metabolism	Metabolism of xenobiotics by cytochrome P450	25	60	1.68757e-05	0.00132897	ko00980	LOC105222104(GstD1);LOC105224360(MGST1);LOC105224876(Ugt1a2);LOC105225812(GST1);LOC105225813(GstD1);LOC105225817(GstD1);LOC105225994(Gst4);LOC105226110(Ugt2a2);LOC105227725(GST1);LOC105228691(GstS1);LOC105229681(GST1);LOC105229689(GST1);LOC105229690(GstD1);LOC105230325(ugt3);LOC105230804(UGT2B13);LOC105230828(UGT2B13);LOC105231237(UGT2B15);LOC105232212(--);LOC105232983(Adh);LOC105232985(Adh);LOC1…	K00799+K00799+K00699+K00799+K00799+K00799+K00799+K00699+K00799+K04097+K00799+K00799+K00799+K00699+K00699+K00699+K00699+K00699+K00001+K00001+K00799+K00799+K00699+K00699+K00799
Metabolism	Metabolism of other amino acids	Glutathione metabolism	24	59	4.01584e-05	0.00252998	ko00480	LOC105222104(GstD1);LOC105224360(MGST1);LOC105224810(Idh1);LOC105224880(se);LOC105225028(GPXMC1);LOC105225087(RnrL);LOC105225812(GST1);LOC105225813(GstD1);LOC105225817(GstD1);LOC105225994(Gst4);LOC105227725(GST1);LOC105228691(GstS1);LOC105229681(GST1);LOC105229689(GST1);LOC105229690(GstD1);LOC105229822(GCLM);LOC105230937(Anpep);LOC105231348(SMS);LOC105233182(APN1);LOC105233734(ANPEP);LOC105234081…	K00799+K00799+K00031+K00310+K00432+K10807+K00799+K00799+K00799+K00799+K00799+K04097+K00799+K00799+K00799+K11205+K11140+K00802+K11140+K11140+K00799+K00799+K00682+K00799
Human Diseases	Cancers	Chemical carcinogenesis	23	57	6.76591e-05	0.0035521	ko05204	LOC105222104(GstD1);LOC105224360(MGST1);LOC105224876(Ugt1a2);LOC105225812(GST1);LOC105225813(GstD1);LOC105225817(GstD1);LOC105225994(Gst4);LOC105226110(Ugt2a2);LOC105227725(GST1);LOC105228691(GstS1);LOC105229681(GST1);LOC105229689(GST1);LOC105229690(GstD1);LOC105230325(ugt3);LOC105230804(UGT2B13);LOC105230828(UGT2B13);LOC105231237(UGT2B15);LOC105232212(--);LOC105234081(MGST1);LOC109579500(GST1);L…	K00799+K00799+K00699+K00799+K00799+K00799+K00799+K00699+K00799+K04097+K00799+K00799+K00799+K00699+K00699+K00699+K00699+K00699+K00799+K00799+K00699+K00699+K00799
Metabolism	Metabolism of cofactors and vitamins	Retinol metabolism	16	34	0.000101536	0.00403004	ko00830	LOC105224204(SDR16C6);LOC105224876(Ugt1a2);LOC105226110(Ugt2a2);LOC105229342(Sdr16c6);LOC105230325(ugt3);LOC105230377(RDH12);LOC105230785(DGAT1);LOC105230804(UGT2B13);LOC105230828(UGT2B13);LOC105231237(UGT2B15);LOC105232212(--);LOC105232906(DHRS4);LOC105232983(Adh);LOC105232985(Adh);LOC109579515(--);LOC115065792(UGT2B13)	K15734+K00699+K00699+K15734+K00699+K11153+K11155+K00699+K00699+K00699+K00699+K11147+K00001+K00001+K00699+K00699
Metabolism	Global and overview maps	Metabolic pathways	197	877	0.00010235	0.00403004	ko01100	LOC105221826(KFase);LOC105222132(SGSH);LOC105222319(Inos);LOC105222358(Lipt1);LOC105222459(CdsA);LOC105222518(ALN);LOC105222650(slgA);LOC105222716(Prat);LOC105222766(Shmt1);LOC105222790(Spr);LOC105222824(GPAM);LOC105223075(Polr1c);LOC105223088(Tusc3);LOC105223108(HMT-1);LOC105223186(Hex-t2);LOC105223311(AAO2);LOC105223314(AAO2);LOC105223573(RpI135);LOC105223612(TECR);LOC105223749(ACAA2);LOC105223…	K01432+K01565+K01858+K10105+K00981+K01466+K00318+K00764+K00600+K00072+K00629+K03027+K12669+K00547+K00844+K00106+K00106+K03002+K10258+K07508+K08764+K01001+K01937+K01937+K10251+K12657+K01697+K14455+K00128+K00002+K00281+K00850+K01077+K01077+K01077+K01183+K02318+K00031+K00699+K12373+K13247+K05289+K10807+K18532+K00819+K17497+K00669+K07441+K00728+K00764+K12309+K00736+K00029+K00846+K03016+K00757+K00699+…
Organismal Systems	Endocrine system	Renin-angiotensin system	8	13	0.000626958	0.0219435	ko04614	LOC105229185(--);LOC105230937(Anpep);LOC105232276(Acer);LOC105232277(Ance);LOC105232878(ACE);LOC105233182(APN1);LOC105233734(ANPEP);LOC105233746(ANPEP)	K01283+K11140+K01283+K01283+K01283+K11140+K11140+K11141
Metabolism	Global and overview maps	Fatty acid metabolism	16	42	0.00180604	0.0568903	ko01212	LOC105223612(TECR);LOC105223749(ACAA2);LOC105224237(hsd17b12a);LOC105226742(Fasn);LOC105227875(ACADSB);LOC105229168(CG5009);LOC105229169(CG5009);LOC105230446(Acads);LOC105231230(HSDL1);LOC105231281(CG12262);LOC105231787(D11DS);LOC105232306(CG4500);LOC105232584(D11DS);LOC105232621(ACAT2);LOC105233729(Scd1);LOC105234158(Oxsm)	K10258+K07508+K10251+K00665+K09478+K00232+K00232+K00248+K10251+K00249+K00507+K15013+K00507+K00626+K00507+K09458
Metabolism	Metabolism of terpenoids and polyketides	Insect hormone biosynthesis	14	37	0.00371325	0.106334	ko00981	LOC105223819(SDR-1);LOC105223822(SDR-1);LOC105223827(SDR-1);LOC105224514(ALDH2);LOC105225180(pho2);LOC105225181(PGLP2);LOC105225301(spo);LOC105227167(PKS19);LOC105227253(SDR-1);LOC105227882(SDR-1);LOC105227938(SDR-1);LOC105228715(jhamt);LOC105229968(Est-5A);LOC105232720(--)	K15890+K15890+K15890+K00128+K21013+K21013+K14939+K10718+K15890+K15890+K15890+K10718+K01063+K21013
Metabolism	Lipid metabolism	Biosynthesis of unsaturated fatty acids	8	17	0.00596371	0.154355	ko01040	LOC105223612(TECR);LOC105224237(hsd17b12a);LOC105229168(CG5009);LOC105229169(CG5009);LOC105231230(HSDL1);LOC105231787(D11DS);LOC105232584(D11DS);LOC105233729(Scd1)	K10258+K10251+K00232+K00232+K10251+K00507+K00507+K00507
Metabolism	Lipid metabolism	Steroid hormone biosynthesis	11	28	0.00708427	0.154355	ko00140	LOC105224237(hsd17b12a);LOC105224876(Ugt1a2);LOC105226110(Ugt2a2);LOC105230325(ugt3);LOC105230804(UGT2B13);LOC105230828(UGT2B13);LOC105231230(HSDL1);LOC105231237(UGT2B15);LOC105232212(--);LOC109579515(--);LOC115065792(UGT2B13)	K10251+K00699+K00699+K00699+K00699+K00699+K10251+K00699+K00699+K00699+K00699
Cellular Processes	Transport and catabolism	Peroxisome	23	77	0.00799161	0.154355	ko04146	LOC105223311(AAO2);LOC105223314(AAO2);LOC105223876(SCP2);LOC105224419(--);LOC105224423(Slc25a17);LOC105224676(Hacl1);LOC105224810(Idh1);LOC105225825(wat);LOC105225838(wat);LOC105226131(PEX5);LOC105226631(--);LOC105228282(Mfe2);LOC105228879(FAR1);LOC105229168(CG5009);LOC105229169(CG5009);LOC105229447(Sod1);LOC105229945(Pex11a);LOC105230858(far1);LOC105230951(XDH);LOC105231888(--);LOC105232906(DHRS…	K00106+K00106+K08764+K13347+K13354+K12261+K00031+K13356+K13356+K13342+K13349+K12405+K13356+K00232+K00232+K04565+K13352+K13356+K00106+K13353+K11147+K13348+K00624
Human Diseases	Cardiovascular diseases	Fluid shear stress and atherosclerosis	23	77	0.00799161	0.154355	ko05418	LOC105222104(GstD1);LOC105222285(Trx-2);LOC105224360(MGST1);LOC105224961(KLHL12);LOC105225812(GST1);LOC105225813(GstD1);LOC105225817(GstD1);LOC105225994(Gst4);LOC105226434(Hsp83);LOC105226824(Cp1);LOC105227725(GST1);LOC105228222(Act79B);LOC105229580(Act88F);LOC105229681(GST1);LOC105229689(GST1);LOC105229690(GstD1);LOC105232151(hep);LOC105232205(--);LOC105232835(Ctla2a);LOC105233251(PIK3CD);LOC105…	K00799+K03671+K00799+K10456+K00799+K00799+K00799+K00799+K04079+K01365+K00799+K05692+K05692+K00799+K00799+K00799+K04431+K10456+K01365+K00922+K00799+K00799+K00799
Organismal Systems	Endocrine system	PPAR signaling pathway	13	36	0.00805853	0.154355	ko03320	LOC105223876(SCP2);LOC105225827(ME1);LOC105229168(CG5009);LOC105229169(CG5009);LOC105231281(CG12262);LOC105231787(D11DS);LOC105232182(Pepck);LOC105232191(Pepck);LOC105232306(CG4500);LOC105232584(D11DS);LOC105232940(SLC27A4);LOC105233729(Scd1);MSTRG.2113(SLC27A4)	K08764+K00029+K00232+K00232+K00249+K00507+K01596+K01596+K15013+K00507+K08745+K00507+K08745
Human Diseases	Drug resistance	Platinum drug resistance	16	48	0.00833029	0.154355	ko01524	LOC105222104(GstD1);LOC105224360(MGST1);LOC105225812(GST1);LOC105225813(GstD1);LOC105225817(GstD1);LOC105225994(Gst4);LOC105227184(Msh6);LOC105227725(GST1);LOC105229681(GST1);LOC105229689(GST1);LOC105229690(GstD1);LOC105232419(spel1);LOC105233251(PIK3CD);LOC105234081(MGST1);LOC109579500(GST1);MSTRG.6737(GstD1)	K00799+K00799+K00799+K00799+K00799+K00799+K08737+K00799+K00799+K00799+K00799+K08735+K00922+K00799+K00799+K00799
Metabolism	Amino acid metabolism	Arginine and proline metabolism	13	37	0.0104122	0.182214	ko00330	LOC105222650(slgA);LOC105224260(Aldh18a1);LOC105224406(GOT2);LOC105224514(ALDH2);LOC105225237(Oat);LOC105226774(P4HA2);LOC105226778(P4HA2);LOC105229149(Nos);LOC105231348(SMS);LOC105231755(P4HA2);LOC105231756(P4HA1);LOC105231760(P4HA1);LOC105232635(Argk)	K00318+K12657+K14455+K00128+K00819+K00472+K00472+K13240+K00802+K00472+K00472+K00472+K00933
Metabolism	Biosynthesis of other secondary metabolites	Caffeine metabolism	4	6	0.0119613	0.188411	ko00232	LOC105223311(AAO2);LOC105223314(AAO2);LOC105230951(XDH);LOC105231184(Uro)	K00106+K00106+K00106+K00365
Organismal Systems	Digestive system	Fat digestion and absorption	10	26	0.0119626	0.188411	ko04975	LOC105224406(GOT2);LOC105227365(PLA2G12B);LOC105227846(PLPP1);LOC105227847(PLPP3);LOC105230785(DGAT1);LOC105232034(--);LOC105232621(ACAT2);LOC105232940(SLC27A4);LOC105234072(--);MSTRG.2113(SLC27A4)	K14455+K01047+K01080+K01080+K11155+K01047+K00626+K08745+K01047+K08745
Human Diseases	Cardiovascular diseases	Hypertrophic cardiomyopathy (HCM)	11	30	0.0127111	0.190667	ko05410	LOC105228222(Act79B);LOC105228699(mys);LOC105229185(--);LOC105229580(Act88F);LOC105229794(Mhc);LOC105231331(CACNA2D3);LOC105232276(Acer);LOC105232277(Ance);LOC105232483(Lama1);LOC105232878(ACE);LOC105232923(Slc8a3)	K05692+K05719+K01283+K05692+K17751+K04860+K01283+K01283+K05637+K01283+K05849
Organismal Systems	Aging	Longevity regulating pathway - worm	22	77	0.016114	0.229523	ko04212	LOC105222104(GstD1);LOC105224360(MGST1);LOC105225812(GST1);LOC105225813(GstD1);LOC105225817(GstD1);LOC105225825(wat);LOC105225838(wat);LOC105225994(Gst4);LOC105227725(GST1);LOC105228080(Hsf);LOC105228879(FAR1);LOC105229681(GST1);LOC105229689(GST1);LOC105229690(GstD1);LOC105230858(far1);LOC105231787(D11DS);LOC105232584(D11DS);LOC105233251(PIK3CD);LOC105233729(Scd1);LOC105234081(MGST1);LOC109579500…	K00799+K00799+K00799+K00799+K00799+K13356+K13356+K00799+K00799+K09414+K13356+K00799+K00799+K00799+K13356+K00507+K00507+K00922+K00507+K00799+K00799+K00799
Metabolism	Glycan biosynthesis and metabolism	N-Glycan biosynthesis	12	35	0.0167588	0.229523	ko00510	LOC105223088(Tusc3);LOC105223889(Dpagt1);LOC105225560(Alg14);LOC105225767(Mgat2);LOC105226794(Alg13);LOC105228793(Ganab);LOC105228919(mgat4b);LOC105229271(wol);LOC105229896(--);LOC105230239(st6gal2);LOC105232327(CG10166);LOC109579495(l(2)k12914)	K12669+K01001+K07441+K00736+K07432+K05546+K00738+K00729+K09659+K00778+K00721+K12668
Metabolism	Glycan biosynthesis and metabolism	Other glycan degradation	8	20	0.0185749	0.243796	ko00511	LOC105224918(fdl);LOC105225659(GLB1);LOC105226747(GBA);LOC105230050(BRAFLDRAFT_56888);LOC105230961(HEXDC);LOC105231810(MANBA);LOC105231812(MANBA);LOC105232311(MAN2B1)	K12373+K12309+K01201+K01206+K14459+K01192+K01192+K12311
Metabolism	Carbohydrate metabolism	Amino sugar and nucleotide sugar metabolism	15	48	0.0195144	0.245882	ko00520	LOC105223186(Hex-t2);LOC105224788(Cht2);LOC105224918(fdl);LOC105225298(CG10688);LOC105226345(CHIA);LOC105226562(chs-2);LOC105228097(Pgi);LOC105228805(MTH_209);LOC105231918(GFPT2);LOC105232153(CHIA);LOC105232255(gmppab);LOC105232357(Cht10);LOC105232601(CG1969);LOC105233016(CMAS);LOC105233954(Uap1)	K00844+K01183+K12373+K17497+K01183+K00698+K01810+K01097+K00820+K01183+K00966+K01183+K00621+K21749+K00972
Human Diseases	Cancers	Hepatocellular carcinoma	25	94	0.0263469	0.319203	ko05225	LOC105222104(GstD1);LOC105222821(PBRM1);LOC105222837(Egfr);LOC105224360(MGST1);LOC105224961(KLHL12);LOC105225067(drk);LOC105225090(Lrp6);LOC105225549(wg);LOC105225812(GST1);LOC105225813(GstD1);LOC105225817(GstD1);LOC105225994(Gst4);LOC105227725(GST1);LOC105228222(Act79B);LOC105229580(Act88F);LOC105229681(GST1);LOC105229689(GST1);LOC105229690(GstD1);LOC105232091(Axn);LOC105232205(--);LOC105233251(…	K00799+K11757+K04361+K00799+K10456+K04364+K03068+K03209+K00799+K00799+K00799+K00799+K00799+K05692+K05692+K00799+K00799+K00799+K02157+K10456+K00922+K00799+K00799+K01064+K00799
Human Diseases	Cancers	Prostate cancer	18	63	0.0280009	0.326677	ko05215	LOC105222104(GstD1);LOC105222837(Egfr);LOC105223991(btl);LOC105224360(MGST1);LOC105225067(drk);LOC105225812(GST1);LOC105225813(GstD1);LOC105225817(GstD1);LOC105225994(Gst4);LOC105226434(Hsp83);LOC105227725(GST1);LOC105229681(GST1);LOC105229689(GST1);LOC105229690(GstD1);LOC105233251(PIK3CD);LOC105234081(MGST1);LOC109579500(GST1);MSTRG.6737(GstD1)	K00799+K04361+K05093+K00799+K04364+K00799+K00799+K00799+K00799+K04079+K00799+K00799+K00799+K00799+K00922+K00799+K00799+K00799
Metabolism	Lipid metabolism	Glycerophospholipid metabolism	16	55	0.0316077	0.355587	ko00564	LOC105222459(CdsA);LOC105222824(GPAM);LOC105224905(sws);LOC105227191(PTDSS1);LOC105227365(PLA2G12B);LOC105227484(eas);LOC105227610(Pisd);LOC105227846(PLPP1);LOC105227847(PLPP3);LOC105229745(CG8745);LOC105229768(ACHE1);LOC105230334(CG34384);LOC105232034(--);LOC105232613(Dgkq);LOC105233389(SELENOI);LOC105234072(--)	K00981+K00629+K14676+K08729+K01047+K00894+K01613+K01080+K01080+K14286+K01049+K00901+K01047+K00901+K00993+K01047
Metabolism	Metabolism of cofactors and vitamins	Folate biosynthesis	11	34	0.0332751	0.361437	ko00790	LOC105222790(Spr);LOC105224718(Alp-m);LOC105224766(ALPPL2);LOC105224767(Alp-m);LOC105224880(se);LOC105226111(Alp-m);LOC105226149(ALPL);LOC105226410(ALPL);LOC105227008(Alp4);LOC105228657(Pu);LOC105231029(Pcd)	K00072+K01077+K01077+K01077+K00310+K01077+K01077+K01077+K01077+K01495+K01724
Metabolism	Lipid metabolism	Steroid biosynthesis	4	8	0.0410643	0.422399	ko00100	LOC105223379(Lip1);LOC105223844(Soat1);LOC105224194(Lip1);LOC105224212(Lip1)	K01052+K00637+K01052+K01052
Metabolism	Metabolism of cofactors and vitamins	Thiamine metabolism	7	19	0.0429103	0.422399	ko00730	LOC105224718(Alp-m);LOC105224766(ALPPL2);LOC105224767(Alp-m);LOC105226111(Alp-m);LOC105226149(ALPL);LOC105226410(ALPL);LOC105227008(Alp4)	K01077+K01077+K01077+K01077+K01077+K01077+K01077
Environmental Information Processing	Signal transduction	Jak-STAT signaling pathway	7	19	0.0429103	0.422399	ko04630	LOC105222837(Egfr);LOC105224755(Stat92E);LOC105225067(drk);LOC105225518(hop);LOC105232048(csw);LOC105233158(SOCS6);LOC105233251(PIK3CD)	K04361+K11224+K04364+K04447+K07293+K04699+K00922
Metabolism	Lipid metabolism	Fatty acid degradation	11	36	0.049529	0.467019	ko00071	LOC105223749(ACAA2);LOC105224514(ALDH2);LOC105227875(ACADSB);LOC105229168(CG5009);LOC105229169(CG5009);LOC105230446(Acads);LOC105231281(CG12262);LOC105232306(CG4500);LOC105232621(ACAT2);LOC105232983(Adh);LOC105232985(Adh)	K07508+K00128+K09478+K00232+K00232+K00248+K00249+K15013+K00626+K00001+K00001
Metabolism	Glycan biosynthesis and metabolism	Other types of O-glycan biosynthesis	5	12	0.0507489	0.467019	ko00514	LOC105225106(Eogt);LOC105225562(tw);LOC105228445(O-fut1);LOC105230239(st6gal2);LOC105231804(rumi)	K18134+K00728+K03691+K00778+K13667
Metabolism	Carbohydrate metabolism	Ascorbate and aldarate metabolism	10	32	0.051891	0.467019	ko00053	LOC105224514(ALDH2);LOC105224876(Ugt1a2);LOC105226110(Ugt2a2);LOC105230325(ugt3);LOC105230804(UGT2B13);LOC105230828(UGT2B13);LOC105231237(UGT2B15);LOC105232212(--);LOC109579515(--);LOC115065792(UGT2B13)	K00128+K00699+K00699+K00699+K00699+K00699+K00699+K00699+K00699+K00699
Cellular Processes	Transport and catabolism	Lysosome	26	105	0.0541891	0.474155	ko04142	LOC105222132(SGSH);LOC105223015(Npc1b);LOC105223033(Slc17a5);LOC105223379(Lip1);LOC105223565(--);LOC105224023(CLN3);LOC105224194(Lip1);LOC105224212(Lip1);LOC105224582(--);LOC105224918(fdl);LOC105225659(GLB1);LOC105226747(GBA);LOC105226824(Cp1);LOC105227741(NAGA);LOC105227766(Cd53);LOC105227880(mfsd8);LOC105228814(HGSNAT);LOC105230050(BRAFLDRAFT_56888);LOC105230796(AAEL006169);LOC105230797(AAEL006…	K01565+K12385+K12301+K01052+K12383+K12389+K01052+K01052+K19363+K12373+K12309+K01201+K01365+K01189+K06497+K12307+K10532+K01206+K01379+K01379+K01379+K02154+K01192+K01192+K12311+K01365
Metabolism	Lipid metabolism	alpha-Linolenic acid metabolism	5	13	0.0705099	0.600287	ko00592	LOC105227365(PLA2G12B);LOC105229168(CG5009);LOC105229169(CG5009);LOC105232034(--);LOC105234072(--)	K01047+K00232+K00232+K01047+K01047
Metabolism	Lipid metabolism	Linoleic acid metabolism	3	6	0.0778856	0.64563	ko00591	LOC105227365(PLA2G12B);LOC105232034(--);LOC105234072(--)	K01047+K01047+K01047
Metabolism	Lipid metabolism	Primary bile acid biosynthesis	2	3	0.0872644	0.657164	ko00120	LOC105223876(SCP2);LOC105228282(Mfe2)	K08764+K12405
Metabolism	Metabolism of cofactors and vitamins	Lipoic acid metabolism	2	3	0.0872644	0.657164	ko00785	LOC105222358(Lipt1);LOC105231745(lipB)	K10105+K03801
Organismal Systems	Immune system	Complement and coagulation cascades	2	3	0.0872644	0.657164	ko04610	LOC105227172(SSPO);LOC105229510(F11)	K03900+K01323
Metabolism	Lipid metabolism	Cutin, suberine and wax biosynthesis	4	10	0.0910926	0.657164	ko00073	LOC105225825(wat);LOC105225838(wat);LOC105228879(FAR1);LOC105230858(far1)	K13356+K13356+K13356+K13356
Organismal Systems	Immune system	Antigen processing and presentation	6	18	0.0923741	0.657164	ko04612	LOC105223056(Psme3);LOC105224006(Hsc70-1);LOC105226434(Hsp83);LOC105226824(Cp1);LOC105231830(Hsc70-2);LOC105232835(Ctla2a)	K06698+K03283+K04079+K01365+K03283+K01365
Human Diseases	Cardiovascular diseases	Arrhythmogenic right ventricular cardiomyopathy (ARVC)	6	18	0.0923741	0.657164	ko05412	LOC105228222(Act79B);LOC105228699(mys);LOC105229580(Act88F);LOC105231331(CACNA2D3);LOC105232483(Lama1);LOC105232923(Slc8a3)	K05692+K05719+K05692+K04860+K05637+K05849
Metabolism	Lipid metabolism	Arachidonic acid metabolism	5	14	0.0938805	0.657164	ko00590	LOC105225028(GPXMC1);LOC105227365(PLA2G12B);LOC105228691(GstS1);LOC105232034(--);LOC105234072(--)	K00432+K01047+K04097+K01047+K01047
Organismal Systems	Endocrine system	Regulation of lipolysis in adipocyte	7	23	0.108714	0.744457	ko04923	LOC105226623(TSHR);LOC105227411(Ac76E);LOC105230125(--);LOC105230478(Npr1);LOC105233251(PIK3CD);LOC105233425(Galphai);MSTRG.8496(--)	K04249+K08042+K12323+K12323+K00922+K04630+K12323
Metabolism	Metabolism of terpenoids and polyketides	Terpenoid backbone biosynthesis	9	32	0.112253	0.752331	ko00900	LOC105222228(Zmpste24);LOC105223819(SDR-1);LOC105223822(SDR-1);LOC105223827(SDR-1);LOC105227253(SDR-1);LOC105227882(SDR-1);LOC105227938(SDR-1);LOC105230724(FDPS);LOC105232621(ACAT2)	K06013+K15890+K15890+K15890+K15890+K15890+K15890+K00787+K00626
Metabolism	Glycan biosynthesis and metabolism	Glycosphingolipid biosynthesis - ganglio series	3	7	0.118357	0.763281	ko00604	LOC105224918(fdl);LOC105225659(GLB1);LOC105226456(Slc33a1)	K12373+K12309+K03372
Human Diseases	Cancers	Pathways in cancer	40	184	0.120043	0.763281	ko05200	LOC105222104(GstD1);LOC105222530(Max);LOC105222837(Egfr);LOC105223991(btl);LOC105224360(MGST1);LOC105224755(Stat92E);LOC105224961(KLHL12);LOC105225067(drk);LOC105225090(Lrp6);LOC105225495(Roc1b);LOC105225518(hop);LOC105225549(wg);LOC105225812(GST1);LOC105225813(GstD1);LOC105225817(GstD1);LOC105225994(Gst4);LOC105226004(Rlip);LOC105226434(Hsp83);LOC105227184(Msh6);LOC105227411(Ac76E);LOC105227725(…	K00799+K04453+K04361+K05093+K00799+K11224+K10456+K04364+K03068+K03868+K04447+K03209+K00799+K00799+K00799+K00799+K08773+K04079+K08737+K08042+K00799+K05719+K00799+K00799+K00799+K04482+K04496+K04539+K02157+K10456+K04547+K08735+K05637+K00922+K04630+K00799+K04634+K00799+K01064+K00799
Human Diseases	Cardiovascular diseases	Dilated cardiomyopathy (DCM)	8	28	0.121156	0.763281	ko05414	LOC105227411(Ac76E);LOC105228222(Act79B);LOC105228699(mys);LOC105229580(Act88F);LOC105229794(Mhc);LOC105231331(CACNA2D3);LOC105232483(Lama1);LOC105232923(Slc8a3)	K08042+K05692+K05719+K05692+K17751+K04860+K05637+K05849
Organismal Systems	Endocrine system	Renin secretion	9	33	0.13079	0.795719	ko04924	LOC105229185(--);LOC105230125(--);LOC105230478(Npr1);LOC105232276(Acer);LOC105232277(Ance);LOC105232878(ACE);LOC105233425(Galphai);LOC109579326(Gnaq);MSTRG.8496(--)	K01283+K12323+K12323+K01283+K01283+K01283+K04630+K04634+K12323
Genetic Information Processing	Folding, sorting and degradation	Protein processing in endoplasmic reticulum	25	110	0.131357	0.795719	ko04141	LOC105222461(Hsp23);LOC105222463(Hsp23);LOC105223088(Tusc3);LOC105223445(HSPH1);LOC105224006(Hsc70-1);LOC105224409(Der-1);LOC105224427(BCAP31);LOC105224693(wbl);LOC105224891(LMAN1);LOC105225479(PNGase);LOC105225495(Roc1b);LOC105225892(DERL2);LOC105226434(Hsp83);LOC105227733(l(2)efl);LOC105228412(SEC61B);LOC105228544(TRAM1);LOC105228596(Sec61gamma);LOC105228716(CaBP1);LOC105228793(Ganab);LOC105228…	K09542+K09542+K12669+K09485+K03283+K11519+K14009+K09586+K10080+K01456+K03868+K13989+K04079+K09542+K09481+K14010+K07342+K09584+K05546+K14001+K09580+K14008+K03283+K04431+K12668
Metabolism	Carbohydrate metabolism	Propanoate metabolism	6	20	0.14057	0.835466	ko00640	LOC105227980(AcCoAS);LOC105229559(Bckdha);LOC105229750(sucg-1);LOC105231281(CG12262);LOC105231405(ImpL3);LOC105232621(ACAT2)	K01895+K00166+K01900+K00249+K00016+K00626
Metabolism	Lipid metabolism	Fatty acid elongation	5	16	0.150572	0.849756	ko00062	LOC105223612(TECR);LOC105223749(ACAA2);LOC105224237(hsd17b12a);LOC105226450(eloF);LOC105231230(HSDL1)	K10258+K07508+K10251+K10249+K10251
Organismal Systems	Endocrine system	Estrogen signaling pathway	13	53	0.152918	0.849756	ko04915	LOC105222268(FKBP59);LOC105222837(Egfr);LOC105224006(Hsc70-1);LOC105225067(drk);LOC105226434(Hsp83);LOC105227411(Ac76E);LOC105230796(AAEL006169);LOC105230797(AAEL006169);LOC105230798(AAEL006169);LOC105231830(Hsc70-2);LOC105233251(PIK3CD);LOC105233425(Galphai);LOC109579326(Gnaq)	K09571+K04361+K03283+K04364+K04079+K08042+K01379+K01379+K01379+K03283+K00922+K04630+K04634
Metabolism	Glycan biosynthesis and metabolism	Mannose type O-glycan biosyntheis	2	4	0.153765	0.849756	ko00515	LOC105225562(tw);LOC105228140(gnt14)	K00728+K21032
Metabolism	Metabolism of cofactors and vitamins	Biotin metabolism	2	4	0.153765	0.849756	ko00780	LOC105232645(vanin-like);LOC105234158(Oxsm)	K01435+K09458
Metabolism	Metabolism of cofactors and vitamins	Porphyrin and chlorophyll metabolism	11	44	0.162721	0.883368	ko00860	LOC105224876(Ugt1a2);LOC105226110(Ugt2a2);LOC105227538(Ppox);LOC105228374(Updo);LOC105230325(ugt3);LOC105230804(UGT2B13);LOC105230828(UGT2B13);LOC105231237(UGT2B15);LOC105232212(--);LOC109579515(--);LOC115065792(UGT2B13)	K00699+K00699+K00231+K01599+K00699+K00699+K00699+K00699+K00699+K00699+K00699
Metabolism	Carbohydrate metabolism	Pentose and glucuronate interconversions	12	49	0.166767	0.883368	ko00040	LOC105224588(AKR1A1);LOC105224876(Ugt1a2);LOC105224947(Cryl1);LOC105226110(Ugt2a2);LOC105228312(DCXR);LOC105230325(ugt3);LOC105230804(UGT2B13);LOC105230828(UGT2B13);LOC105231237(UGT2B15);LOC105232212(--);LOC109579515(--);LOC115065792(UGT2B13)	K00002+K00699+K13247+K00699+K03331+K00699+K00699+K00699+K00699+K00699+K00699+K00699
Metabolism	Amino acid metabolism	Tyrosine metabolism	6	21	0.168261	0.883368	ko00350	LOC105224406(GOT2);LOC105231903(yellow-f2);LOC105232983(Adh);LOC105232985(Adh);LOC105233819(hgo);LOC115066680(hgo)	K14455+K22203+K00001+K00001+K00451+K00451
Metabolism	Amino acid metabolism	Glycine, serine and threonine metabolism	7	26	0.180361	0.909604	ko00260	LOC105222766(Shmt1);LOC105224361(CBSL);LOC105224599(Gldc);LOC105224652(GCAT);LOC105226796(THA2);LOC105228244(GNMT);LOC105228945(Sardh)	K00600+K01697+K00281+K00639+K01620+K00552+K00314
Human Diseases	Immune diseases	Autoimmune thyroid disease	1	1	0.182041	0.909604	ko05320	LOC105226623(TSHR)	K04249
Organismal Systems	Digestive system	Cholesterol metabolism	5	17	0.183212	0.909604	ko04979	LOC105223015(Npc1b);LOC105223379(Lip1);LOC105223844(Soat1);LOC105224194(Lip1);LOC105224212(Lip1)	K12385+K01052+K00637+K01052+K01052
Organismal Systems	Immune system	Toll and Imd signaling pathway	18	80	0.192242	0.909604	ko04624	LOC105222535(GNBP1);LOC105224657(Spn42Dd);LOC105226802(ea);LOC105227455(etaTry);LOC105229334(dl);LOC105229697(DEFA);LOC105229698(DEFC);LOC105231286(PGRP-SD);LOC105231288(PGRP-LF);LOC105231663(PGRP-LB);LOC105231664(PGRP-LB);LOC105231777(CEC1);LOC105232010(GNBP3);LOC105232011(GNBP3);LOC105232151(hep);LOC105233457(spz);LOC109579906(--);LOC115066596(Cfi)	K20697+K20698+K20672+K20676+K09254+K20668+K20668+K01446+K01446+K01446+K01446+K20696+K20692+K20692+K04431+K20694+K10380+K20671
Metabolism	Lipid metabolism	Ether lipid metabolism	6	22	0.198012	0.909604	ko00565	LOC105227365(PLA2G12B);LOC105227846(PLPP1);LOC105227847(PLPP3);LOC105232034(--);LOC105233389(SELENOI);LOC105234072(--)	K01047+K01080+K01080+K01047+K00993+K01047
Genetic Information Processing	Folding, sorting and degradation	Protein export	6	22	0.198012	0.909604	ko03060	LOC105223697(Spase25);LOC105228412(SEC61B);LOC105228596(Sec61gamma);LOC105230011(Spase22-23);LOC105231873(Sec11a);LOC105232640(Spase12)	K12947+K09481+K07342+K12948+K13280+K12946
Metabolism	Glycan biosynthesis and metabolism	Glycosaminoglycan biosynthesis - heparan sulfate / heparin	4	13	0.199247	0.909604	ko00534	LOC105228120(ttv);LOC105230846(hs6st3b);LOC105232037(ttv);LOC105234204(GlcAT-I)	K02366+K02514+K02366+K10158
Metabolism	Metabolism of cofactors and vitamins	Pantothenate and CoA biosynthesis	4	13	0.199247	0.909604	ko00770	LOC105224800(COASY);LOC105227635(Ppcs);LOC105227904(PANK1);LOC105232140(vanin-like)	K02318+K01922+K09680+K08069
Environmental Information Processing	Membrane transport	ABC transporters	4	13	0.199247	0.909604	ko02010	LOC105222965(ABCA3);LOC105226497(Mdr65);LOC105230475(abcb6);LOC105230756(ABCG1)	K05643+K05658+K05661+K05679
Organismal Systems	Immune system	Hematopoietic cell lineage	3	9	0.21534	0.969029	ko04640	LOC105230937(Anpep);LOC105233182(APN1);LOC105233734(ANPEP)	K11140+K11140+K11140
Organismal Systems	Digestive system	Bile secretion	11	47	0.224175	0.989114	ko04976	LOC105224876(Ugt1a2);LOC105226110(Ugt2a2);LOC105226497(Mdr65);LOC105227411(Ac76E);LOC105230325(ugt3);LOC105230804(UGT2B13);LOC105230828(UGT2B13);LOC105231237(UGT2B15);LOC105232212(--);LOC109579515(--);LOC115065792(UGT2B13)	K00699+K00699+K05658+K08042+K00699+K00699+K00699+K00699+K00699+K00699+K00699
Environmental Information Processing	Signal transduction	Hippo signaling pathway -fly	13	57	0.226083	0.989114	ko04391	LOC105223481(HMCN1);LOC105223641(--);LOC105225549(wg);LOC105225859(wts);LOC105228222(Act79B);LOC105228649(Tret1-2);LOC105229262(ex);LOC105229580(Act88F);LOC105230692(egr);LOC105231344(app);LOC105232568(mats);LOC105233721(vn);LOC115065999(dlg1)	K16680+K16689+K03209+K08791+K05692+K06069+K16683+K05692+K16678+K16675+K06685+K16690+K12076
Metabolism	Amino acid metabolism	Tryptophan metabolism	5	19	0.254915	1	ko00380	LOC105221826(KFase);LOC105224514(ALDH2);LOC105225353(AANAT1);LOC105228982(cn);LOC105232621(ACAT2)	K01432+K00128+K00669+K00486+K00626
Metabolism	Lipid metabolism	Fatty acid biosynthesis	3	10	0.268589	1	ko00061	LOC105226742(Fasn);LOC105232306(CG4500);LOC105234158(Oxsm)	K00665+K15013+K09458
Metabolism	Metabolism of cofactors and vitamins	Ubiquinone and other terpenoid-quinone biosynthesis	3	10	0.268589	1	ko00130	LOC105228853(Coq7);LOC105230774(Coq6);LOC105231061(Coq2)	K06134+K06126+K06125
Cellular Processes	Cell growth and death	Apoptosis - fly	11	49	0.269571	1	ko04214	LOC105222837(Egfr);LOC105224480(Dronc);LOC105225038(PRDX4);LOC105225270(Eip74EF);LOC105225859(wts);LOC105226319(--);LOC105230502(Drice);LOC105230692(egr);LOC105232151(hep);LOC105232870(Btf3l4);LOC105234044(mei-41)	K04361+K20009+K03386+K09428+K08791+K20010+K20008+K16678+K04431+K01527+K06640
Metabolism	Amino acid metabolism	Arginine biosynthesis	4	15	0.285293	1	ko00220	LOC105224406(GOT2);LOC105229149(Nos);LOC105229306(Gs1);LOC105229765(Acy1b)	K14455+K13240+K01915+K14677
Metabolism	Glycan biosynthesis and metabolism	Glycosaminoglycan degradation	4	15	0.285293	1	ko00531	LOC105222132(SGSH);LOC105224918(fdl);LOC105225659(GLB1);LOC105228814(HGSNAT)	K01565+K12373+K12309+K10532
Metabolism	Carbohydrate metabolism	Pentose phosphate pathway	5	20	0.29303	1	ko00030	LOC105224618(Pfk);LOC105228097(Pgi);LOC105228163(Taldo);LOC105228674(CG17333);LOC105229143(Tktl2)	K00850+K01810+K00616+K01057+K00615
Metabolism	Glycan biosynthesis and metabolism	Mucin type O-glycan biosynthesis	5	20	0.29303	1	ko00512	LOC105226423(GALNT14);LOC105226711(gly-5);LOC105226964(GalNAc-T2);LOC105229056(C1GalTA);LOC105233760(pgant4)	K00710+K00710+K00710+K00731+K00710
Metabolism	Glycan biosynthesis and metabolism	Glycosphingolipid biosynthesis - globo and isoglobo series	2	6	0.300547	1	ko00603	LOC105224918(fdl);LOC105227741(NAGA)	K12373+K01189
Organismal Systems	Environmental adaptation	Circadian rhythm - fly	2	6	0.300547	1	ko04711	LOC105229038(HLF);LOC105233653(tim)	K09057+K12074
Metabolism	Carbohydrate metabolism	Glycolysis / Gluconeogenesis	11	51	0.317594	1	ko00010	LOC105223186(Hex-t2);LOC105224514(ALDH2);LOC105224588(AKR1A1);LOC105224618(Pfk);LOC105227980(AcCoAS);LOC105228097(Pgi);LOC105231405(ImpL3);LOC105232182(Pepck);LOC105232191(Pepck);LOC105232983(Adh);LOC105232985(Adh)	K00844+K00128+K00002+K00850+K01895+K01810+K00016+K01596+K01596+K00001+K00001
Environmental Information Processing	Signaling molecules and interaction	ECM-receptor interaction	4	16	0.3302	1	ko04512	LOC105227172(SSPO);LOC105228699(mys);LOC105230174(Col1a2);LOC105232483(Lama1)	K03900+K05719+K19719+K05637
Metabolism	Lipid metabolism	Sphingolipid metabolism	6	26	0.331434	1	ko00600	LOC105225659(GLB1);LOC105226747(GBA);LOC105227741(NAGA);LOC105227846(PLPP1);LOC105227847(PLPP3);LOC105231761(CDase)	K12309+K01201+K01189+K01080+K01080+K12349
Human Diseases	Cancers	Gastric cancer	9	42	0.351928	1	ko05226	LOC105222837(Egfr);LOC105223991(btl);LOC105225067(drk);LOC105225090(Lrp6);LOC105225549(wg);LOC105226497(Mdr65);LOC105232091(Axn);LOC105233251(PIK3CD);LOC115066525(Wnt4)	K04361+K05093+K04364+K03068+K03209+K05658+K02157+K00922+K01064
Organismal Systems	Development	Dorso-ventral axis formation	7	32	0.361835	1	ko04320	LOC105222191(rho);LOC105222837(Egfr);LOC105225067(drk);LOC105226448(rho);LOC105228744(aop);LOC105230567(aub);LOC105232402(grk)	K02857+K04361+K04364+K02857+K03211+K02156+K02447
Metabolism	Amino acid metabolism	Histidine metabolism	2	7	0.373423	1	ko00340	LOC105224514(ALDH2);LOC105232128(CG11596)	K00128+K19787
Environmental Information Processing	Signal transduction	Hippo signaling pathway - multiple species	4	17	0.375427	1	ko04392	LOC105225859(wts);LOC105227058(Pak3);LOC105229262(ex);LOC105232568(mats)	K08791+K04409+K16683+K06685
Organismal Systems	Sensory system	Taste transduction	4	17	0.375427	1	ko04742	LOC105230554(5-HT1B);LOC105230555(5-HT1A);LOC105231278(Grd);LOC105232251(Ggamma30A)	K04153+K04153+K05175+K04547
Human Diseases	Neurodegenerative diseases	Prion diseases	4	17	0.375427	1	ko05020	LOC105223913(STIP1);LOC105224006(Hsc70-1);LOC105229447(Sod1);LOC105231830(Hsc70-2)	K09553+K03283+K04565+K03283
Metabolism	Lipid metabolism	Glycerolipid metabolism	9	43	0.380045	1	ko00561	LOC105222824(GPAM);LOC105224514(ALDH2);LOC105224588(AKR1A1);LOC105227741(NAGA);LOC105227846(PLPP1);LOC105227847(PLPP3);LOC105230334(CG34384);LOC105230785(DGAT1);LOC105232613(Dgkq)	K00629+K00128+K00002+K01189+K01080+K01080+K00901+K11155+K00901
Metabolism	Amino acid metabolism	Cysteine and methionine metabolism	7	33	0.394304	1	ko00270	LOC105223108(HMT-1);LOC105224361(CBSL);LOC105224406(GOT2);LOC105228941(cdo1);LOC105229822(GCLM);LOC105231348(SMS);LOC105231405(ImpL3)	K00547+K01697+K14455+K00456+K11205+K00802+K00016
Metabolism	Amino acid metabolism	Valine, leucine and isoleucine degradation	7	33	0.394304	1	ko00280	LOC105223749(ACAA2);LOC105224514(ALDH2);LOC105227875(ACADSB);LOC105229559(Bckdha);LOC105230446(Acads);LOC105231281(CG12262);LOC105232621(ACAT2)	K07508+K00128+K09478+K00166+K00248+K00249+K00626
Human Diseases	Endocrine and metabolic diseases	Insulin resistance	10	49	0.400201	1	ko04931	LOC105224081(Mlxipl);LOC105231918(GFPT2);LOC105232048(csw);LOC105232182(Pepck);LOC105232191(Pepck);LOC105232625(Gbs-76A);LOC105232940(SLC27A4);LOC105233251(PIK3CD);LOC105233985(SREBF2);MSTRG.2113(SLC27A4)	K09113+K00820+K07293+K01596+K01596+K07189+K08745+K00922+K07197+K08745
Genetic Information Processing	Transcription	RNA polymerase	6	28	0.40223	1	ko03020	LOC105223075(Polr1c);LOC105223573(RpI135);LOC105225953(POLR2H);LOC105226526(RpI1);LOC105226786(--);LOC105233593(--)	K03027+K03002+K03016+K02999+K03005+K03004
Human Diseases	Cardiovascular diseases	Viral myocarditis	4	18	0.420364	1	ko05416	LOC105228222(Act79B);LOC105229580(Act88F);LOC105229794(Mhc);LOC105232483(Lama1)	K05692+K05692+K17751+K05637
Metabolism	Nucleotide metabolism	Purine metabolism	24	125	0.421362	1	ko00230	LOC105222518(ALN);LOC105222716(Prat);LOC105223075(Polr1c);LOC105223311(AAO2);LOC105223314(AAO2);LOC105223573(RpI135);LOC105225087(RnrL);LOC105225104(Ak6);LOC105225623(Prat);LOC105225953(POLR2H);LOC105226526(RpI1);LOC105226786(--);LOC105227411(Ac76E);LOC105227488(SPCC285.04);LOC105227970(PNP);LOC105230125(--);LOC105230238(Gyc89Db);LOC105230331(Gucy2f);LOC105230478(Npr1);LOC105230951(XDH);LOC105231…	K01466+K00764+K03027+K00106+K00106+K03002+K10807+K18532+K00764+K03016+K02999+K03005+K08042+K07127+K03783+K12323+K01769+K12322+K12323+K00106+K00365+K19572+K03004+K12323
Human Diseases	Infectious diseases	Toxoplasmosis	7	34	0.426777	1	ko05145	LOC105224006(Hsc70-1);LOC105225518(hop);LOC105228699(mys);LOC105229770(Cyp1);LOC105231830(Hsc70-2);LOC105232483(Lama1);LOC105233425(Galphai)	K03283+K04447+K05719+K09565+K03283+K05637+K04630
Human Diseases	Cancers	Central carbon metabolism in cancer	7	34	0.426777	1	ko05230	LOC105222837(Egfr);LOC105223186(Hex-t2);LOC105223991(btl);LOC105224618(Pfk);LOC105224810(Idh1);LOC105231405(ImpL3);LOC105233251(PIK3CD)	K04361+K00844+K05093+K00850+K00031+K00016+K00922
Metabolism	Nucleotide metabolism	Pyrimidine metabolism	15	77	0.430982	1	ko00240	LOC105223075(Polr1c);LOC105223573(RpI135);LOC105223978(--);LOC105223979(CTPsyn);LOC105225087(RnrL);LOC105225953(POLR2H);LOC105226045(UPP1);LOC105226526(RpI1);LOC105226786(--);LOC105227970(PNP);LOC105228870(DUT);LOC105231050(UPP1);LOC105231525(r-l);LOC105233253(Upp1);LOC105233593(--)	K03027+K03002+K01937+K01937+K10807+K03016+K00757+K02999+K03005+K03783+K01520+K00757+K13421+K00757+K03004
Metabolism	Metabolism of cofactors and vitamins	Nicotinate and nicotinamide metabolism	3	13	0.431016	1	ko00760	LOC105227970(PNP);LOC105228428(Nadk);LOC105229294(CG3714)	K03783+K00858+K00763
Organismal Systems	Immune system	Platelet activation	9	45	0.436586	1	ko04611	LOC105227172(SSPO);LOC105227411(Ac76E);LOC105228222(Act79B);LOC105228649(Tret1-2);LOC105228699(mys);LOC105229580(Act88F);LOC105233251(PIK3CD);LOC105233425(Galphai);LOC109579326(Gnaq)	K03900+K08042+K05692+K06069+K05719+K05692+K00922+K04630+K04634
Human Diseases	Immune diseases	Systemic lupus erythematosus	2	8	0.442987	1	ko05322	LOC105225618(Actn);LOC105233100(Grin2b)	K05699+K05210
Metabolism	Amino acid metabolism	Lysine degradation	8	40	0.447202	1	ko00310	LOC105223355(BBOX1);LOC105224514(ALDH2);LOC105228149(trr);LOC105228811(Bbox1);LOC105229197(AASS);LOC105229910(PR-Set7);LOC105232621(ACAT2);MSTRG.9464(--)	K00471+K00128+K09188+K00471+K14157+K11428+K00626+K00471
Metabolism	Carbohydrate metabolism	Pyruvate metabolism	8	40	0.447202	1	ko00620	LOC105224514(ALDH2);LOC105225827(ME1);LOC105227980(AcCoAS);LOC105231405(ImpL3);LOC105231564(Acyp);LOC105232182(Pepck);LOC105232191(Pepck);LOC105232621(ACAT2)	K00128+K00029+K01895+K00016+K01512+K01596+K01596+K00626
Metabolism	Amino acid metabolism	Alanine, aspartate and glutamate metabolism	5	24	0.449896	1	ko00250	LOC105222716(Prat);LOC105224406(GOT2);LOC105225623(Prat);LOC105229306(Gs1);LOC105231918(GFPT2)	K00764+K14455+K00764+K01915+K00820
Metabolism	Biosynthesis of other secondary metabolites	Neomycin, kanamycin and gentamicin biosynthesis	1	3	0.452851	1	ko00524	LOC105223186(Hex-t2)	K00844
Metabolism	Global and overview maps	Biosynthesis of amino acids	11	57	0.468704	1	ko01230	LOC105222766(Shmt1);LOC105224260(Aldh18a1);LOC105224361(CBSL);LOC105224406(GOT2);LOC105224618(Pfk);LOC105224810(Idh1);LOC105226796(THA2);LOC105228163(Taldo);LOC105229143(Tktl2);LOC105229306(Gs1);LOC105229765(Acy1b)	K00600+K12657+K01697+K14455+K00850+K00031+K01620+K00616+K00615+K01915+K14677
Genetic Information Processing	Translation	RNA transport	22	117	0.47085	1	ko03013	LOC105222433(PHAX);LOC105223739(Nup154);LOC105224190(Rpp30);LOC105224475(eIF1);LOC105224695(--);LOC105224740(POP1);LOC105225293(eIF2beta);LOC105225488(Upf1);LOC105225502(Nup153);LOC105226535(tacc3);LOC105227110(Pym);LOC105227585(casc3);LOC105227643(thoc7);LOC105229153(STRAP);LOC105230559(eIF3j);LOC105231555(--);LOC105231914(Eif4e2);LOC105232631(SRRM1);LOC105233134(--);LOC105233162(Nup205);LOC1052…	K14291+K14312+K03539+K03113+K14322+K01164+K03238+K14326+K14296+K14283+K14294+K14323+K13176+K13137+K03245+K14316+K03259+K13171+K13114+K14310+K14292+K14314
Organismal Systems	Nervous system	Glutamatergic synapse	8	41	0.477042	1	ko04724	LOC105222157(HOMER2);LOC105227411(Ac76E);LOC105229306(Gs1);LOC105232029(Gnb5);LOC105232251(Ggamma30A);LOC105233100(Grin2b);LOC105233425(Galphai);LOC109579326(Gnaq)	K15010+K08042+K01915+K04539+K04547+K05210+K04630+K04634
Metabolism	Carbohydrate metabolism	Fructose and mannose metabolism	5	25	0.488228	1	ko00051	LOC105223186(Hex-t2);LOC105224618(Pfk);LOC105225298(CG10688);LOC105225946(Khk);LOC105232255(gmppab)	K00844+K00850+K17497+K00846+K00966
Organismal Systems	Endocrine system	Adipocytokine signaling pathway	5	25	0.488228	1	ko04920	LOC105225518(hop);LOC105232048(csw);LOC105232182(Pepck);LOC105232191(Pepck);LOC105232306(CG4500)	K04447+K07293+K01596+K01596+K15013
Organismal Systems	Immune system	Leukocyte transendothelial migration	7	36	0.490897	1	ko04670	LOC105225618(Actn);LOC105228222(Act79B);LOC105228699(mys);LOC105229580(Act88F);LOC105232048(csw);LOC105233251(PIK3CD);LOC105233425(Galphai)	K05699+K05692+K05719+K05692+K07293+K00922+K04630
Organismal Systems	Sensory system	Phototransduction - fly	7	36	0.490897	1	ko04745	LOC105225234(Gbeta76C);LOC105227342(rdgC);LOC105228222(Act79B);LOC105228248(Dagla);LOC105229580(Act88F);LOC105232251(Ggamma30A);LOC109579326(Gnaq)	K07972+K13807+K05692+K13806+K05692+K04547+K04634
Human Diseases	Substance dependence	Nicotine addiction	2	9	0.508028	1	ko05033	LOC105231278(Grd);LOC105233100(Grin2b)	K05175+K05210
Organismal Systems	Immune system	Chemokine signaling pathway	9	48	0.520055	1	ko04062	LOC105224755(Stat92E);LOC105225067(drk);LOC105225518(hop);LOC105227058(Pak3);LOC105227411(Ac76E);LOC105232029(Gnb5);LOC105232251(Ggamma30A);LOC105233251(PIK3CD);LOC105233425(Galphai)	K11224+K04364+K04447+K04409+K08042+K04539+K04547+K00922+K04630
Environmental Information Processing	Signal transduction	Ras signaling pathway	14	76	0.527979	1	ko04014	LOC105222837(Egfr);LOC105223991(btl);LOC105225067(drk);LOC105226004(Rlip);LOC105227058(Pak3);LOC105227365(PLA2G12B);LOC105229334(dl);LOC105232029(Gnb5);LOC105232034(--);LOC105232048(csw);LOC105232251(Ggamma30A);LOC105233100(Grin2b);LOC105233251(PIK3CD);LOC105234072(--)	K04361+K05093+K04364+K08773+K04409+K01047+K09254+K04539+K01047+K07293+K04547+K05210+K00922+K01047
Metabolism	Carbohydrate metabolism	Glyoxylate and dicarboxylate metabolism	6	32	0.54025	1	ko00630	LOC105221826(KFase);LOC105222766(Shmt1);LOC105224599(Gldc);LOC105227980(AcCoAS);LOC105229306(Gs1);LOC105232621(ACAT2)	K01432+K00600+K00281+K01895+K01915+K00626
Metabolism	Amino acid metabolism	Phenylalanine, tyrosine and tryptophan biosynthesis	1	4	0.552546	1	ko00400	LOC105224406(GOT2)	K14455
Organismal Systems	Sensory system	Phototransduction	1	4	0.552546	1	ko04744	LOC105230331(Gucy2f)	K12322
Human Diseases	Infectious diseases	Pathogenic Escherichia coli infection	7	38	0.552707	1	ko05130	LOC105226868(betaTub56D);LOC105227022(mod);LOC105228222(Act79B);LOC105228699(mys);LOC105229580(Act88F);LOC105231497(alphaTub84B);LOC105232633(--)	K07375+K11294+K05692+K05719+K05692+K07374+K11294
Environmental Information Processing	Signal transduction	PI3K-Akt signaling pathway	17	94	0.555318	1	ko04151	LOC105222837(Egfr);LOC105223991(btl);LOC105224983(Myb);LOC105225067(drk);LOC105225518(hop);LOC105226434(Hsp83);LOC105227172(SSPO);LOC105228699(mys);LOC105230174(Col1a2);LOC105231914(Eif4e2);LOC105232029(Gnb5);LOC105232182(Pepck);LOC105232191(Pepck);LOC105232251(Ggamma30A);LOC105232483(Lama1);LOC105232724(Cdc37);LOC105233251(PIK3CD)	K04361+K05093+K09420+K04364+K04447+K04079+K03900+K05719+K19719+K03259+K04539+K01596+K01596+K04547+K05637+K09554+K00922
Human Diseases	Cancers	Choline metabolism in cancer	10	55	0.557478	1	ko05231	LOC105222837(Egfr);LOC105224472(CG1311);LOC105225067(drk);LOC105226287(Orct);LOC105227846(PLPP1);LOC105227847(PLPP3);LOC105230334(CG34384);LOC105231741(Orct2);LOC105232613(Dgkq);LOC105233251(PIK3CD)	K04361+K06515+K04364+K08202+K01080+K01080+K00901+K08202+K00901+K00922
Genetic Information Processing	Replication and repair	Fanconi anemia pathway	5	27	0.561651	1	ko03460	LOC105223503(--);LOC105223535(mei-9);LOC105225284(UBC37);LOC105231800(RAD51);LOC105234044(mei-41)	K10740+K10848+K13960+K04482+K06640
Human Diseases	Cancers	Chronic myeloid leukemia	5	27	0.561651	1	ko05220	LOC105224755(Stat92E);LOC105225067(drk);LOC105231906(CtBP);LOC105232048(csw);LOC105233251(PIK3CD)	K11224+K04364+K04496+K07293+K00922
Metabolism	Metabolism of cofactors and vitamins	One carbon pool by folate	2	10	0.567888	1	ko00670	LOC105222766(Shmt1);LOC105223295(aldh1l1)	K00600+K00289
Human Diseases	Drug resistance	EGFR tyrosine kinase inhibitor resistance	6	33	0.572682	1	ko01521	LOC105222837(Egfr);LOC105223991(btl);LOC105225067(drk);LOC105225518(hop);LOC105231914(Eif4e2);LOC105233251(PIK3CD)	K04361+K05093+K04364+K04447+K03259+K00922
Human Diseases	Infectious diseases	Measles	6	33	0.572682	1	ko05162	LOC105224006(Hsc70-1);LOC105224755(Stat92E);LOC105225518(hop);LOC105231830(Hsc70-2);LOC105233251(PIK3CD);LOC105233949(Rchy1)	K03283+K11224+K04447+K03283+K00922+K10144
Metabolism	Global and overview maps	2-Oxocarboxylic acid metabolism	3	16	0.578681	1	ko01210	LOC105224406(GOT2);LOC105224810(Idh1);LOC105229765(Acy1b)	K14455+K00031+K14677
Cellular Processes	Cell growth and death	p53 signaling pathway	4	22	0.587969	1	ko04115	LOC105229053(Cdk1);LOC105233714(sina);LOC105233949(Rchy1);LOC105234044(mei-41)	K02087+K04506+K10144+K06640
Organismal Systems	Digestive system	Protein digestion and absorption	11	62	0.590463	1	ko04974	LOC105223011(yin);LOC105223013(yin);LOC105223014(yin);LOC105225165(ami);LOC105225174(Prss1);LOC105228391(TRYP4);LOC105228392(TRYP3);LOC105229852(SLC3A2);LOC105230174(Col1a2);LOC105232923(Slc8a3);MSTRG.3707(--)	K14206+K14206+K14206+K01312+K01312+K01312+K01312+K06519+K19719+K05849+K14209
Organismal Systems	Nervous system	Cholinergic synapse	8	45	0.591082	1	ko04725	LOC105225518(hop);LOC105227411(Ac76E);LOC105229768(ACHE1);LOC105232029(Gnb5);LOC105232251(Ggamma30A);LOC105233251(PIK3CD);LOC105233425(Galphai);LOC109579326(Gnaq)	K04447+K08042+K01049+K04539+K04547+K00922+K04630+K04634
Human Diseases	Neurodegenerative diseases	Amyotrophic lateral sclerosis (ALS)	5	28	0.596308	1	ko05014	LOC105224409(Der-1);LOC105225028(GPXMC1);LOC105229149(Nos);LOC105229447(Sod1);LOC105233100(Grin2b)	K11519+K00432+K13240+K04565+K05210
Cellular Processes	Transport and catabolism	Phagosome	13	74	0.605215	1	ko04145	LOC105226824(Cp1);LOC105226868(betaTub56D);LOC105228222(Act79B);LOC105228412(SEC61B);LOC105228596(Sec61gamma);LOC105228699(mys);LOC105229149(Nos);LOC105229580(Act88F);LOC105231497(alphaTub84B);LOC105231750(Atp6v0a1);LOC105232161(Vha13);LOC105232703(Dhc64C);LOC105232835(Ctla2a)	K01365+K07375+K05692+K09481+K07342+K05719+K13240+K05692+K07374+K02154+K02152+K10413+K01365
Organismal Systems	Nervous system	GABAergic synapse	7	40	0.61104	1	ko04727	LOC105227411(Ac76E);LOC105228157(SLC12A6);LOC105229306(Gs1);LOC105231278(Grd);LOC105232029(Gnb5);LOC105232251(Ggamma30A);LOC105233425(Galphai)	K08042+K14427+K01915+K05175+K04539+K04547+K04630
Human Diseases	Cancers	Breast cancer	7	40	0.61104	1	ko05224	LOC105222837(Egfr);LOC105225067(drk);LOC105225090(Lrp6);LOC105225549(wg);LOC105232091(Axn);LOC105233251(PIK3CD);LOC115066525(Wnt4)	K04361+K04364+K03068+K03209+K02157+K00922+K01064
Organismal Systems	Aging	Longevity regulating pathway - multiple species	8	46	0.617685	1	ko04213	LOC105222461(Hsp23);LOC105222463(Hsp23);LOC105224006(Hsc70-1);LOC105227411(Ac76E);LOC105227733(l(2)efl);LOC105229447(Sod1);LOC105231830(Hsc70-2);LOC105233251(PIK3CD)	K09542+K09542+K03283+K08042+K09542+K04565+K03283+K00922
Cellular Processes	Cellular community - eukaryotes	Signaling pathways regulating pluripotency of stem cells	8	46	0.617685	1	ko04550	LOC105223991(btl);LOC105225067(drk);LOC105225518(hop);LOC105225549(wg);LOC105225728(Actbeta);LOC105232091(Axn);LOC105233251(PIK3CD);LOC115066525(Wnt4)	K05093+K04364+K04447+K03209+K22687+K02157+K00922+K01064
Metabolism	Metabolism of other amino acids	beta-Alanine metabolism	3	17	0.622236	1	ko00410	LOC105224514(ALDH2);LOC105231281(CG12262);LOC105231348(SMS)	K00128+K00249+K00802
Organismal Systems	Digestive system	Vitamin digestion and absorption	3	17	0.622236	1	ko04977	LOC105226014(SLC19A2);LOC105227011(Slc23a2);LOC105232645(vanin-like)	K14610+K14611+K01435
Cellular Processes	Cell growth and death	Ferroptosis	2	11	0.622295	1	ko04216	LOC105229822(GCLM);LOC105229852(SLC3A2)	K11205+K06519
Organismal Systems	Endocrine system	Relaxin signaling pathway	9	52	0.623955	1	ko04926	LOC105222837(Egfr);LOC105225067(drk);LOC105227411(Ac76E);LOC105229149(Nos);LOC105232029(Gnb5);LOC105232151(hep);LOC105232251(Ggamma30A);LOC105233251(PIK3CD);LOC105233425(Galphai)	K04361+K04364+K08042+K13240+K04539+K04431+K04547+K00922+K04630
Organismal Systems	Endocrine system	Prolactin signaling pathway	5	29	0.629379	1	ko04917	LOC105224755(Stat92E);LOC105225067(drk);LOC105225518(hop);LOC105233158(SOCS6);LOC105233251(PIK3CD)	K11224+K04364+K04447+K04699+K00922
Human Diseases	Cancers	Colorectal cancer	6	35	0.633929	1	ko05210	LOC105222837(Egfr);LOC105225067(drk);LOC105227184(Msh6);LOC105232091(Axn);LOC105232419(spel1);LOC105233251(PIK3CD)	K04361+K04364+K08737+K02157+K08735+K00922
Metabolism	Metabolism of other amino acids	Phosphonate and phosphinate metabolism	1	5	0.634101	1	ko00440	LOC105233389(SELENOI)	K00993
Human Diseases	Infectious diseases	Chagas disease (American trypanosomiasis)	7	41	0.638628	1	ko05142	LOC105229185(--);LOC105232276(Acer);LOC105232277(Ance);LOC105232878(ACE);LOC105233251(PIK3CD);LOC105233425(Galphai);LOC109579326(Gnaq)	K01283+K01283+K01283+K01283+K00922+K04630+K04634
Environmental Information Processing	Signal transduction	cAMP signaling pathway	13	76	0.646215	1	ko04024	LOC105226623(TSHR);LOC105227058(Pak3);LOC105227411(Ac76E);LOC105229168(CG5009);LOC105229169(CG5009);LOC105230125(--);LOC105230478(Npr1);LOC105230554(5-HT1B);LOC105230555(5-HT1A);LOC105233100(Grin2b);LOC105233251(PIK3CD);LOC105233425(Galphai);MSTRG.8496(--)	K04249+K04409+K08042+K00232+K00232+K12323+K12323+K04153+K04153+K05210+K00922+K04630+K12323
Genetic Information Processing	Replication and repair	Homologous recombination	4	24	0.660329	1	ko03440	LOC105223503(--);LOC105229007(--);LOC105231800(RAD51);LOC105233787(XRCC3)	K10740+K10871+K04482+K10880
Human Diseases	Cancers	Endometrial cancer	4	24	0.660329	1	ko05213	LOC105222837(Egfr);LOC105225067(drk);LOC105232091(Axn);LOC105233251(PIK3CD)	K04361+K04364+K02157+K00922
Metabolism	Carbohydrate metabolism	Butanoate metabolism	2	12	0.671248	1	ko00650	LOC105230446(Acads);LOC105232621(ACAT2)	K00248+K00626
Metabolism	Global and overview maps	Carbon metabolism	16	95	0.678206	1	ko01200	LOC105222766(Shmt1);LOC105223186(Hex-t2);LOC105224406(GOT2);LOC105224599(Gldc);LOC105224618(Pfk);LOC105224810(Idh1);LOC105225827(ME1);LOC105227980(AcCoAS);LOC105228097(Pgi);LOC105228163(Taldo);LOC105228674(CG17333);LOC105229143(Tktl2);LOC105229750(sucg-1);LOC105230446(Acads);LOC105231281(CG12262);LOC105232621(ACAT2)	K00600+K00844+K14455+K00281+K00850+K00031+K00029+K01895+K01810+K00616+K01057+K00615+K01900+K00248+K00249+K00626
Organismal Systems	Environmental adaptation	Circadian entrainment	7	43	0.690273	1	ko04713	LOC105227411(Ac76E);LOC105229149(Nos);LOC105232029(Gnb5);LOC105232251(Ggamma30A);LOC105233100(Grin2b);LOC105233425(Galphai);LOC109579326(Gnaq)	K08042+K13240+K04539+K04547+K05210+K04630+K04634
Organismal Systems	Nervous system	Serotonergic synapse	7	43	0.690273	1	ko04726	LOC105223854(SerT);LOC105230554(5-HT1B);LOC105230555(5-HT1A);LOC105232029(Gnb5);LOC105232251(Ggamma30A);LOC105233425(Galphai);LOC109579326(Gnaq)	K05037+K04153+K04153+K04539+K04547+K04630+K04634
Cellular Processes	Cellular community - eukaryotes	Gap junction	8	49	0.691612	1	ko04540	LOC105222837(Egfr);LOC105225067(drk);LOC105226868(betaTub56D);LOC105227411(Ac76E);LOC105229053(Cdk1);LOC105231497(alphaTub84B);LOC105233425(Galphai);LOC109579326(Gnaq)	K04361+K04364+K07375+K08042+K02087+K07374+K04630+K04634
Human Diseases	Cancers	Pancreatic cancer	4	25	0.69311	1	ko05212	LOC105222837(Egfr);LOC105226004(Rlip);LOC105231800(RAD51);LOC105233251(PIK3CD)	K04361+K08773+K04482+K00922
Genetic Information Processing	Replication and repair	Mismatch repair	3	19	0.699759	1	ko03430	LOC105223503(--);LOC105227184(Msh6);LOC105232419(spel1)	K10740+K08737+K08735
Human Diseases	Cancers	Acute myeloid leukemia	3	19	0.699759	1	ko05221	LOC105224755(Stat92E);LOC105225067(drk);LOC105233251(PIK3CD)	K11224+K04364+K00922
Metabolism	Lipid metabolism	Synthesis and degradation of ketone bodies	1	6	0.700812	1	ko00072	LOC105232621(ACAT2)	K00626
Metabolism	Amino acid metabolism	Phenylalanine metabolism	1	6	0.700812	1	ko00360	LOC105224406(GOT2)	K14455
Metabolism	Metabolism of cofactors and vitamins	Vitamin B6 metabolism	1	6	0.700812	1	ko00750	LOC105230296(PNPO)	K00275
Metabolism	Energy metabolism	Sulfur metabolism	1	6	0.700812	1	ko00920	LOC105232682(impad1)	K15759
Genetic Information Processing	Folding, sorting and degradation	Sulfur relay system	1	6	0.700812	1	ko04122	LOC105230667(GI19452)	K14168
Organismal Systems	Excretory system	Proximal tubule bicarbonate reclamation	2	13	0.714927	1	ko04964	LOC105232182(Pepck);LOC105232191(Pepck)	K01596+K01596
Human Diseases	Cancers	Melanoma	2	13	0.714927	1	ko05218	LOC105222837(Egfr);LOC105233251(PIK3CD)	K04361+K00922
Environmental Information Processing	Signal transduction	Rap1 signaling pathway	11	68	0.717318	1	ko04015	LOC105222837(Egfr);LOC105223991(btl);LOC105227411(Ac76E);LOC105228222(Act79B);LOC105228649(Tret1-2);LOC105228699(mys);LOC105229580(Act88F);LOC105233100(Grin2b);LOC105233251(PIK3CD);LOC105233425(Galphai);LOC109579326(Gnaq)	K04361+K05093+K08042+K05692+K06069+K05719+K05692+K05210+K00922+K04630+K04634
Metabolism	Carbohydrate metabolism	Galactose metabolism	5	32	0.71816	1	ko00052	LOC105223186(Hex-t2);LOC105224618(Pfk);LOC105225659(GLB1);LOC105227741(NAGA);LOC105228045(Mal-A3)	K00844+K00850+K12309+K01189+K01187
Organismal Systems	Immune system	T cell receptor signaling pathway	5	32	0.71816	1	ko04660	LOC105225067(drk);LOC105227058(Pak3);LOC105232151(hep);LOC105233251(PIK3CD);LOC115065999(dlg1)	K04364+K04409+K04431+K00922+K12076
Human Diseases	Infectious diseases	Bacterial invasion of epithelial cells	5	32	0.71816	1	ko05100	LOC105228222(Act79B);LOC105228699(mys);LOC105229580(Act88F);LOC105230219(--);LOC105233251(PIK3CD)	K05692+K05719+K05692+K13728+K00922
Environmental Information Processing	Signal transduction	Wnt signaling pathway	12	74	0.719048	1	ko04310	LOC105224491(Notum);LOC105224601(pont);LOC105224647(esn);LOC105224932(CACYBP);LOC105225090(Lrp6);LOC105225495(Roc1b);LOC105225549(wg);LOC105228235(por);LOC105231906(CtBP);LOC105232091(Axn);LOC105233714(sina);LOC115066525(Wnt4)	K19882+K04499+K04511+K04507+K03068+K03868+K03209+K00181+K04496+K02157+K04506+K01064
Cellular Processes	Cellular community - eukaryotes	Focal adhesion	12	74	0.719048	1	ko04510	LOC105222837(Egfr);LOC105225067(drk);LOC105225618(Actn);LOC105227058(Pak3);LOC105227172(SSPO);LOC105228222(Act79B);LOC105228699(mys);LOC105229580(Act88F);LOC105230174(Col1a2);LOC105232483(Lama1);LOC105233251(PIK3CD);LOC105234174(Flnc)	K04361+K04364+K05699+K04409+K03900+K05692+K05719+K05692+K19719+K05637+K00922+K04437
Human Diseases	Infectious diseases	Hepatitis C	4	26	0.723574	1	ko05160	LOC105222837(Egfr);LOC105223056(Psme3);LOC105225067(drk);LOC105233251(PIK3CD)	K04361+K06698+K04364+K00922
Human Diseases	Substance dependence	Cocaine addiction	3	20	0.733715	1	ko05030	LOC105227310(DAT);LOC105233100(Grin2b);LOC105233425(Galphai)	K05036+K05210+K04630
Environmental Information Processing	Signal transduction	AMPK signaling pathway	9	57	0.735048	1	ko04152	LOC105224618(Pfk);LOC105226742(Fasn);LOC105231787(D11DS);LOC105232182(Pepck);LOC105232191(Pepck);LOC105232584(D11DS);LOC105233251(PIK3CD);LOC105233729(Scd1);LOC105233985(SREBF2)	K00850+K00665+K00507+K01596+K01596+K00507+K00922+K00507+K07197
Organismal Systems	Endocrine system	Insulin signaling pathway	10	63	0.735192	1	ko04910	LOC105223186(Hex-t2);LOC105225067(drk);LOC105226742(Fasn);LOC105228649(Tret1-2);LOC105231914(Eif4e2);LOC105232182(Pepck);LOC105232191(Pepck);LOC105232625(Gbs-76A);LOC105233251(PIK3CD);LOC105233985(SREBF2)	K00844+K04364+K00665+K06069+K03259+K01596+K01596+K07189+K00922+K07197
Human Diseases	Cancers	Transcriptional misregulation in cancers	8	51	0.735541	1	ko05202	LOC105221788(--);LOC105222530(Max);LOC105222718(SUPT3H);LOC105224398(prd);LOC105228744(aop);LOC105229334(dl);LOC105229591(Mllt3);LOC105233575(Kdm6a)	K06571+K04453+K11313+K09381+K03211+K09254+K15187+K11447
Human Diseases	Substance dependence	Alcoholism	7	45	0.736921	1	ko05034	LOC105225067(drk);LOC105225766(HDAC11);LOC105227310(DAT);LOC105232029(Gnb5);LOC105232251(Ggamma30A);LOC105233100(Grin2b);LOC105233425(Galphai)	K04364+K11418+K05036+K04539+K04547+K05210+K04630
Environmental Information Processing	Signal transduction	ErbB signaling pathway	6	39	0.739575	1	ko04012	LOC105222837(Egfr);LOC105224755(Stat92E);LOC105225067(drk);LOC105227058(Pak3);LOC105232151(hep);LOC105233251(PIK3CD)	K04361+K11224+K04364+K04409+K04431+K00922
Human Diseases	Infectious diseases	Leishmaniasis	2	14	0.753626	1	ko05140	LOC105225518(hop);LOC105228699(mys)	K04447+K05719
Cellular Processes	Cell growth and death	Apoptosis	9	58	0.754359	1	ko04210	LOC105226824(Cp1);LOC105228222(Act79B);LOC105229580(Act88F);LOC105230796(AAEL006169);LOC105230797(AAEL006169);LOC105230798(AAEL006169);LOC105231497(alphaTub84B);LOC105232835(Ctla2a);LOC105233251(PIK3CD)	K01365+K05692+K05692+K01379+K01379+K01379+K07374+K01365+K00922
Metabolism	Glycan biosynthesis and metabolism	Glycosaminoglycan biosynthesis - chondroitin sulfate / dermatan sulfate	1	7	0.755377	1	ko00532	LOC105234204(GlcAT-I)	K10158
Organismal Systems	Endocrine system	Progesterone-mediated oocyte maturation	8	52	0.755829	1	ko04914	LOC105226434(Hsp83);LOC105227411(Ac76E);LOC105229053(Cdk1);LOC105230219(--);LOC105230513(MAD1L1);LOC105230699(anapc13);LOC105233251(PIK3CD);LOC105233425(Galphai)	K04079+K08042+K02087+K13728+K06638+K12456+K00922+K04630
Environmental Information Processing	Signal transduction	Notch signaling pathway	3	21	0.764567	1	ko04330	LOC105221970(pen-2);LOC105231906(CtBP);LOC105233250(H)	K06170+K04496+K06064
Human Diseases	Cancers	Basal cell carcinoma	3	21	0.764567	1	ko05217	LOC105225549(wg);LOC105232091(Axn);LOC115066525(Wnt4)	K03209+K02157+K01064
Organismal Systems	Endocrine system	Oxytocin signaling pathway	10	65	0.771187	1	ko04921	LOC105222837(Egfr);LOC105227411(Ac76E);LOC105228222(Act79B);LOC105229580(Act88F);LOC105230125(--);LOC105230478(Npr1);LOC105231331(CACNA2D3);LOC105233425(Galphai);LOC109579326(Gnaq);MSTRG.8496(--)	K04361+K08042+K05692+K05692+K12323+K12323+K04860+K04630+K04634+K12323
Human Diseases	Infectious diseases	Vibrio cholerae infection	8	53	0.774995	1	ko05110	LOC105225976(Slc12a2);LOC105228222(Act79B);LOC105228412(SEC61B);LOC105228596(Sec61gamma);LOC105229580(Act88F);LOC105231750(Atp6v0a1);LOC105232161(Vha13);LOC105234205(KdelR)	K10951+K05692+K09481+K07342+K05692+K02154+K02152+K10949
Human Diseases	Cancers	Small cell lung cancer	4	28	0.777639	1	ko05222	LOC105222530(Max);LOC105228699(mys);LOC105232483(Lama1);LOC105233251(PIK3CD)	K04453+K05719+K05637+K00922
Human Diseases	Drug resistance	Endocrine resistance	5	35	0.790706	1	ko01522	LOC105222837(Egfr);LOC105223205(Art4);LOC105225067(drk);LOC105227411(Ac76E);LOC105233251(PIK3CD)	K04361+K05931+K04364+K08042+K00922
Environmental Information Processing	Signaling molecules and interaction	Cell adhesion molecules (CAMs)	1	8	0.800004	1	ko04514	LOC105228699(mys)	K05719
Human Diseases	Endocrine and metabolic diseases	Type I diabetes mellitus	1	8	0.800004	1	ko04940	LOC105233765(Ptprn2)	K07817
Organismal Systems	Immune system	Natural killer cell mediated cytotoxicity	4	29	0.80136	1	ko04650	LOC105225067(drk);LOC105227058(Pak3);LOC105232048(csw);LOC105233251(PIK3CD)	K04364+K04409+K07293+K00922
Human Diseases	Cancers	Non-small cell lung cancer	4	29	0.80136	1	ko05223	LOC105222837(Egfr);LOC105224755(Stat92E);LOC105225067(drk);LOC105233251(PIK3CD)	K04361+K11224+K04364+K00922
Environmental Information Processing	Signal transduction	cGMP - PKG signaling pathway	9	61	0.806322	1	ko04022	LOC105227411(Ac76E);LOC105229770(Cyp1);LOC105229794(Mhc);LOC105230125(--);LOC105230478(Npr1);LOC105232923(Slc8a3);LOC105233425(Galphai);LOC109579326(Gnaq);MSTRG.8496(--)	K08042+K09565+K17751+K12323+K12323+K05849+K04630+K04634+K12323
Human Diseases	Cancers	Proteoglycans in cancer	15	98	0.811229	1	ko05205	LOC105222837(Egfr);LOC105225067(drk);LOC105225549(wg);LOC105226824(Cp1);LOC105227058(Pak3);LOC105227766(Cd53);LOC105228222(Act79B);LOC105228699(mys);LOC105229580(Act88F);LOC105232048(csw);LOC105232835(Ctla2a);LOC105233251(PIK3CD);LOC105234174(Flnc);LOC109579906(--);LOC115066525(Wnt4)	K04361+K04364+K03209+K01365+K04409+K06497+K05692+K05719+K05692+K07293+K01365+K00922+K04437+K10380+K01064
Environmental Information Processing	Signal transduction	Apelin signaling pathway	7	49	0.814912	1	ko04371	LOC105227411(Ac76E);LOC105229149(Nos);LOC105232029(Gnb5);LOC105232251(Ggamma30A);LOC105232923(Slc8a3);LOC105233425(Galphai);LOC109579326(Gnaq)	K08042+K13240+K04539+K04547+K05849+K04630+K04634
Organismal Systems	Sensory system	Olfactory transduction	2	16	0.817569	1	ko04740	LOC105232251(Ggamma30A);LOC105232923(Slc8a3)	K04547+K05849
Environmental Information Processing	Signaling molecules and interaction	Neuroactive ligand-receptor interaction	10	68	0.818464	1	ko04080	LOC105225165(ami);LOC105225174(Prss1);LOC105226623(TSHR);LOC105228391(TRYP4);LOC105228392(TRYP3);LOC105229170(crhr1);LOC105230554(5-HT1B);LOC105230555(5-HT1A);LOC105231278(Grd);LOC105233100(Grin2b)	K01312+K01312+K04249+K01312+K01312+K04578+K04153+K04153+K05175+K05210
Environmental Information Processing	Signal transduction	MAPK signaling pathway - fly	13	87	0.825683	1	ko04013	LOC105222837(Egfr);LOC105225067(drk);LOC105226639(pros);LOC105228180(Dok2);LOC105228744(aop);LOC105230340(sev);LOC105230692(egr);LOC105231362(Ipo7);LOC105232048(csw);LOC105232151(hep);LOC105232402(grk);LOC105233714(sina);LOC105233721(vn)	K04361+K04364+K20211+K20234+K03211+K05088+K16678+K20223+K07293+K04431+K02447+K04506+K16690
Organismal Systems	Endocrine system	Thyroid hormone synthesis	5	37	0.83039	1	ko04918	LOC105225028(GPXMC1);LOC105226623(TSHR);LOC105226635(lds);LOC105227411(Ac76E);LOC109579326(Gnaq)	K00432+K04249+K15173+K08042+K04634
Human Diseases	Cancers	Renal cell carcinoma	5	37	0.83039	1	ko05211	LOC105225067(drk);LOC105225495(Roc1b);LOC105227058(Pak3);LOC105232048(csw);LOC105233251(PIK3CD)	K04364+K03868+K04409+K07293+K00922
Genetic Information Processing	Folding, sorting and degradation	RNA degradation	7	50	0.831318	1	ko03018	LOC105224618(Pfk);LOC105226498(Edc3);LOC105227093(Dis3);LOC105228905(Dcp2);LOC105229074(Mtrex);LOC105231161(Mphosph6);LOC105233196(EXOSC10)	K00850+K12615+K12585+K12613+K12598+K12593+K12591
Genetic Information Processing	Translation	mRNA surveillance pathway	9	63	0.8361	1	ko03015	LOC105222093(Rb97D);LOC105225488(Upf1);LOC105227110(Pym);LOC105227585(casc3);LOC105231149(Gspt1);LOC105232267(SMG5);LOC105232631(SRRM1);LOC105232787(Rb97D);LOC105233134(--)	K14411+K14326+K14294+K14323+K03267+K11125+K13171+K14411+K13114
Environmental Information Processing	Signal transduction	Phospholipase D signaling pathway	9	63	0.8361	1	ko04072	LOC105222837(Egfr);LOC105225067(drk);LOC105227411(Ac76E);LOC105227846(PLPP1);LOC105227847(PLPP3);LOC105230334(CG34384);LOC105232048(csw);LOC105232613(Dgkq);LOC105233251(PIK3CD)	K04361+K04364+K08042+K01080+K01080+K00901+K07293+K00901+K00922
Metabolism	Metabolism of other amino acids	Taurine and hypotaurine metabolism	1	9	0.836501	1	ko00430	LOC105228941(cdo1)	K00456
Environmental Information Processing	Signaling molecules and interaction	Cytokine-cytokine receptor interaction	1	9	0.836501	1	ko04060	LOC105225728(Actbeta)	K22687
Human Diseases	Cancers	Bladder cancer	1	9	0.836501	1	ko05219	LOC105222837(Egfr)	K04361
Organismal Systems	Endocrine system	Aldosterone synthesis and secretion	6	44	0.838429	1	ko04925	LOC105227411(Ac76E);LOC105228248(Dagla);LOC105230125(--);LOC105230478(Npr1);LOC109579326(Gnaq);MSTRG.8496(--)	K08042+K13806+K12323+K12323+K04634+K12323
Organismal Systems	Immune system	Th17 cell differentiation	3	24	0.839987	1	ko04659	LOC105224755(Stat92E);LOC105225518(hop);LOC105226434(Hsp83)	K11224+K04447+K04079
Human Diseases	Immune diseases	Rheumatoid arthritis	4	31	0.842641	1	ko05323	LOC105226824(Cp1);LOC105231750(Atp6v0a1);LOC105232161(Vha13);LOC105232835(Ctla2a)	K01365+K02154+K02152+K01365
Human Diseases	Substance dependence	Morphine addiction	5	38	0.847815	1	ko05032	LOC105227411(Ac76E);LOC105231278(Grd);LOC105232029(Gnb5);LOC105232251(Ggamma30A);LOC105233425(Galphai)	K08042+K05175+K04539+K04547+K04630
Cellular Processes	Cell motility	Regulation of actin cytoskeleton	9	64	0.849594	1	ko04810	LOC105222837(Egfr);LOC105223991(btl);LOC105225618(Actn);LOC105227058(Pak3);LOC105228222(Act79B);LOC105228699(mys);LOC105229580(Act88F);LOC105229886(Gel);LOC105233251(PIK3CD)	K04361+K05093+K05699+K04409+K05692+K05719+K05692+K05768+K00922
Organismal Systems	Digestive system	Carbohydrate digestion and absorption	2	18	0.866239	1	ko04973	LOC105223186(Hex-t2);LOC105233251(PIK3CD)	K00844+K00922
Organismal Systems	Circulatory system	Vascular smooth muscle contraction	8	59	0.867356	1	ko04270	LOC105227365(PLA2G12B);LOC105227411(Ac76E);LOC105230125(--);LOC105230478(Npr1);LOC105232034(--);LOC105234072(--);LOC109579326(Gnaq);MSTRG.8496(--)	K01047+K08042+K12323+K12323+K01047+K01047+K04634+K12323
Genetic Information Processing	Replication and repair	Nucleotide excision repair	5	40	0.878229	1	ko03420	LOC105223503(--);LOC105223535(mei-9);LOC105225495(Roc1b);LOC105226657(ercc5);LOC105229988(CUL4B)	K10740+K10848+K03868+K10846+K10609
Organismal Systems	Digestive system	Gastric acid secretion	5	40	0.878229	1	ko04971	LOC105227411(Ac76E);LOC105228222(Act79B);LOC105229580(Act88F);LOC105233425(Galphai);LOC109579326(Gnaq)	K08042+K05692+K05692+K04630+K04634
Cellular Processes	Cell growth and death	Apoptosis - multiple species	2	19	0.885825	1	ko04215	LOC105224480(Dronc);LOC105230502(Drice)	K20009+K20008
Human Diseases	Endocrine and metabolic diseases	Type II diabetes mellitus	2	19	0.885825	1	ko04930	LOC105223186(Hex-t2);LOC105233251(PIK3CD)	K00844+K00922
Human Diseases	Infectious diseases	Pertussis	2	19	0.885825	1	ko05133	LOC105228699(mys);LOC105233425(Galphai)	K05719+K04630
Human Diseases	Endocrine and metabolic diseases	Cushing syndrome	8	61	0.890268	1	ko04934	LOC105222837(Egfr);LOC105225549(wg);LOC105227411(Ac76E);LOC105229170(crhr1);LOC105232091(Axn);LOC105233425(Galphai);LOC109579326(Gnaq);LOC115066525(Wnt4)	K04361+K03209+K08042+K04578+K02157+K04630+K04634+K01064
Organismal Systems	Development	Osteoclast differentiation	3	27	0.893573	1	ko04380	LOC105225067(drk);LOC105232151(hep);LOC105233251(PIK3CD)	K04364+K04431+K00922
Cellular Processes	Cellular community - eukaryotes	Tight junction	8	62	0.900429	1	ko04530	LOC105225618(Actn);LOC105228222(Act79B);LOC105228649(Tret1-2);LOC105228699(mys);LOC105229580(Act88F);LOC105231497(alphaTub84B);LOC105232151(hep);LOC115065999(dlg1)	K05699+K05692+K06069+K05719+K05692+K07374+K04431+K12076
Organismal Systems	Endocrine system	Cortisol synthesis and secretion	2	20	0.902726	1	ko04927	LOC105227411(Ac76E);LOC109579326(Gnaq)	K08042+K04634
Cellular Processes	Cell growth and death	Necroptosis	5	42	0.903312	1	ko04217	LOC105224755(Stat92E);LOC105225518(hop);LOC105226434(Hsp83);LOC105229306(Gs1);LOC105232921(Rnf31)	K11224+K04447+K04079+K01915+K11974
Organismal Systems	Endocrine system	Parathyroid hormone synthesis, secretion and action	5	42	0.903312	1	ko04928	LOC105222837(Egfr);LOC105225090(Lrp6);LOC105227411(Ac76E);LOC105233425(Galphai);LOC109579326(Gnaq)	K04361+K03068+K08042+K04630+K04634
Organismal Systems	Nervous system	Long-term depression	4	35	0.90381	1	ko04730	LOC105229149(Nos);LOC105229170(crhr1);LOC105233425(Galphai);LOC109579326(Gnaq)	K13240+K04578+K04630+K04634
Human Diseases	Infectious diseases	Shigellosis	4	35	0.90381	1	ko05131	LOC105228222(Act79B);LOC105228699(mys);LOC105229580(Act88F);LOC105230219(--)	K05692+K05719+K05692+K13728
Organismal Systems	Immune system	Fc gamma R-mediated phagocytosis	6	49	0.904589	1	ko04666	LOC105227058(Pak3);LOC105227846(PLPP1);LOC105227847(PLPP3);LOC105229886(Gel);LOC105229989(Asap);LOC105233251(PIK3CD)	K04409+K01080+K01080+K05768+K12488+K00922
Organismal Systems	Immune system	Fc epsilon RI signaling pathway	3	28	0.907485	1	ko04664	LOC105225067(drk);LOC105232151(hep);LOC105233251(PIK3CD)	K04364+K04431+K00922
Environmental Information Processing	Signal transduction	Hippo signaling pathway	9	70	0.913018	1	ko04390	LOC105225549(wg);LOC105225859(wts);LOC105228222(Act79B);LOC105228649(Tret1-2);LOC105229580(Act88F);LOC105232091(Axn);LOC105232568(mats);LOC115065999(dlg1);LOC115066525(Wnt4)	K03209+K08791+K05692+K06069+K05692+K02157+K06685+K12076+K01064
Human Diseases	Infectious diseases	Salmonella infection	4	36	0.915364	1	ko05132	LOC105228222(Act79B);LOC105229580(Act88F);LOC105232703(Dhc64C);LOC105234174(Flnc)	K05692+K05692+K10413+K04437
Human Diseases	Infectious diseases	Amoebiasis	4	36	0.915364	1	ko05146	LOC105225618(Actn);LOC105232483(Lama1);LOC105233251(PIK3CD);LOC109579326(Gnaq)	K05699+K05637+K00922+K04634
Human Diseases	Infectious diseases	Influenza A	12	90	0.91642	1	ko05164	LOC105224006(Hsc70-1);LOC105225165(ami);LOC105225174(Prss1);LOC105225518(hop);LOC105228222(Act79B);LOC105228391(TRYP4);LOC105228392(TRYP3);LOC105229580(Act88F);LOC105230724(FDPS);LOC105231830(Hsc70-2);LOC105232151(hep);LOC105233251(PIK3CD)	K03283+K01312+K01312+K04447+K05692+K01312+K01312+K05692+K00787+K03283+K04431+K00922
Organismal Systems	Immune system	Cytosolic DNA-sensing pathway	2	21	0.917269	1	ko04623	LOC105223075(Polr1c);LOC105225953(POLR2H)	K03027+K03016
Organismal Systems	Immune system	Th1 and Th2 cell differentiation	2	21	0.917269	1	ko04658	LOC105224755(Stat92E);LOC105225518(hop)	K11224+K04447
Organismal Systems	Immune system	B cell receptor signaling pathway	2	21	0.917269	1	ko04662	LOC105225067(drk);LOC105233251(PIK3CD)	K04364+K00922
Organismal Systems	Immune system	C-type lectin receptor signaling pathway	3	29	0.91973	1	ko04625	LOC105227058(Pak3);LOC105232048(csw);LOC105233251(PIK3CD)	K04409+K07293+K00922
Metabolism	Carbohydrate metabolism	Citrate cycle (TCA cycle)	4	37	0.925663	1	ko00020	LOC105224810(Idh1);LOC105229750(sucg-1);LOC105232182(Pepck);LOC105232191(Pepck)	K00031+K01900+K01596+K01596
Organismal Systems	Environmental adaptation	Circadian rhythm	1	13	0.927022	1	ko04710	LOC105225495(Roc1b)	K03868
Organismal Systems	Excretory system	Vasopressin-regulated water reabsorption	2	22	0.929751	1	ko04962	LOC105232186(ctp);LOC105232703(Dhc64C)	K10418+K10413
Human Diseases	Cancers	Glioma	3	30	0.930479	1	ko05214	LOC105222837(Egfr);LOC105225067(drk);LOC105233251(PIK3CD)	K04361+K04364+K00922
Environmental Information Processing	Signal transduction	HIF-1 signaling pathway	7	59	0.932323	1	ko04066	LOC105222837(Egfr);LOC105223186(Hex-t2);LOC105224618(Pfk);LOC105225495(Roc1b);LOC105231405(ImpL3);LOC105231914(Eif4e2);LOC105233251(PIK3CD)	K04361+K00844+K00850+K03868+K00016+K03259+K00922
Organismal Systems	Immune system	NOD-like receptor signaling pathway	4	38	0.934822	1	ko04621	LOC105221787(Dhx33);LOC105222285(Trx-2);LOC105226434(Hsp83);LOC105232921(Rnf31)	K17820+K03671+K04079+K11974
Human Diseases	Infectious diseases	Legionellosis	3	31	0.93989	1	ko05134	LOC105224006(Hsc70-1);LOC105228080(Hsf);LOC105231830(Hsc70-2)	K03283+K09414+K03283
Organismal Systems	Endocrine system	Melanogenesis	5	46	0.940309	1	ko04916	LOC105225549(wg);LOC105227411(Ac76E);LOC105233425(Galphai);LOC109579326(Gnaq);LOC115066525(Wnt4)	K03209+K08042+K04630+K04634+K01064
Organismal Systems	Endocrine system	Ovarian Steroidogenesis	1	14	0.94036	1	ko04913	LOC105227411(Ac76E)	K08042
Metabolism	Glycan biosynthesis and metabolism	Glycosylphosphatidylinositol(GPI)-anchor biosynthesis	2	23	0.940439	1	ko00563	LOC105224982(Gpaa1);LOC105228492(Pigu)	K05289+K05293
Organismal Systems	Excretory system	Collecting duct acid secretion	2	23	0.940439	1	ko04966	LOC105231750(Atp6v0a1);LOC105232161(Vha13)	K02154+K02152
Organismal Systems	Digestive system	Pancreatic secretion	10	81	0.942857	1	ko04972	LOC105225165(ami);LOC105225174(Prss1);LOC105225976(Slc12a2);LOC105227365(PLA2G12B);LOC105227411(Ac76E);LOC105228391(TRYP4);LOC105228392(TRYP3);LOC105232034(--);LOC105234072(--);LOC109579326(Gnaq)	K01312+K01312+K10951+K01047+K08042+K01312+K01312+K01047+K01047+K04634
Organismal Systems	Endocrine system	Glucagon signaling pathway	6	54	0.945985	1	ko04922	LOC105224618(Pfk);LOC105227411(Ac76E);LOC105231405(ImpL3);LOC105232182(Pepck);LOC105232191(Pepck);LOC109579326(Gnaq)	K00850+K08042+K00016+K01596+K01596+K04634
Organismal Systems	Endocrine system	GnRH signaling pathway	5	47	0.947302	1	ko04912	LOC105222837(Egfr);LOC105225067(drk);LOC105227411(Ac76E);LOC105232151(hep);LOC109579326(Gnaq)	K04361+K04364+K08042+K04431+K04634
Environmental Information Processing	Signal transduction	FoxO signaling pathway	7	62	0.951453	1	ko04068	LOC105222157(HOMER2);LOC105222837(Egfr);LOC105225067(drk);LOC105229463(SAK);LOC105232182(Pepck);LOC105232191(Pepck);LOC105233251(PIK3CD)	K15010+K04361+K04364+K08863+K01596+K01596+K00922
Metabolism	Carbohydrate metabolism	Starch and sucrose metabolism	3	33	0.955276	1	ko00500	LOC105223186(Hex-t2);LOC105228045(Mal-A3);LOC105228097(Pgi)	K00844+K01187+K01810
Metabolism	Carbohydrate metabolism	Inositol phosphate metabolism	4	41	0.956488	1	ko00562	LOC105222319(Inos);LOC105229147(Mtmr14);LOC105232682(impad1);LOC105233251(PIK3CD)	K01858+K18086+K15759+K00922
Cellular Processes	Cellular community - eukaryotes	Adherens junction	4	41	0.956488	1	ko04520	LOC105222837(Egfr);LOC105225618(Actn);LOC105228222(Act79B);LOC105229580(Act88F)	K04361+K05699+K05692+K05692
Environmental Information Processing	Signal transduction	Hedgehog signaling pathway - fly	2	25	0.957358	1	ko04341	LOC105225495(Roc1b);LOC105227616(hh)	K03868+K06224
Environmental Information Processing	Signal transduction	Phosphatidylinositol signaling system	6	56	0.957427	1	ko04070	LOC105222459(CdsA);LOC105229147(Mtmr14);LOC105230334(CG34384);LOC105232613(Dgkq);LOC105232682(impad1);LOC105233251(PIK3CD)	K00981+K18086+K00901+K00901+K15759+K00922
Human Diseases	Infectious diseases	Epithelial cell signaling in Helicobacter pylori infection	5	49	0.959109	1	ko05120	LOC105222837(Egfr);LOC105227058(Pak3);LOC105231750(Atp6v0a1);LOC105232048(csw);LOC105232161(Vha13)	K04361+K04409+K02154+K07293+K02152
Metabolism	Energy metabolism	Nitrogen metabolism	1	16	0.960177	1	ko00910	LOC105229306(Gs1)	K01915
Environmental Information Processing	Signal transduction	Sphingolipid signaling pathway	7	64	0.961362	1	ko04071	LOC105230796(AAEL006169);LOC105230797(AAEL006169);LOC105230798(AAEL006169);LOC105231761(CDase);LOC105233251(PIK3CD);LOC105233425(Galphai);LOC109579326(Gnaq)	K01379+K01379+K01379+K12349+K00922+K04630+K04634
Genetic Information Processing	Transcription	Spliceosome	14	112	0.962103	1	ko03040	LOC105221767(snRNP-U1-70K);LOC105224006(Hsc70-1);LOC105224270(PRPF3);LOC105224424(Sf3b3);LOC105224781(Cherp);LOC105226454(hoip);LOC105228680(snrnp27);LOC105229208(Sart1);LOC105230192(ZK1098.1);LOC105230851(Ctnnbl1);LOC105231830(Hsc70-2);LOC105232797(Hrb87F);LOC105233342(Rbm25);LOC105233361(SRSF7)	K11093+K03283+K12843+K12830+K12841+K12845+K12846+K11984+K12821+K12864+K03283+K12741+K12822+K12896
Environmental Information Processing	Signal transduction	TNF signaling pathway	2	26	0.963986	1	ko04668	LOC105232151(hep);LOC105233251(PIK3CD)	K04431+K00922
Human Diseases	Infectious diseases	Kaposi sarcoma-associated herpesvirus infection	5	50	0.964056	1	ko05167	LOC105225518(hop);LOC105232029(Gnb5);LOC105232151(hep);LOC105232251(Ggamma30A);LOC105233251(PIK3CD)	K04447+K04539+K04431+K04547+K00922
Human Diseases	Infectious diseases	Human cytomegalovirus infection	8	72	0.965148	1	ko05163	LOC105222837(Egfr);LOC105225067(drk);LOC105227411(Ac76E);LOC105232029(Gnb5);LOC105232251(Ggamma30A);LOC105233251(PIK3CD);LOC105233425(Galphai);LOC109579326(Gnaq)	K04361+K04364+K08042+K04539+K04547+K00922+K04630+K04634
Environmental Information Processing	Signal transduction	MAPK signaling pathway	11	93	0.965974	1	ko04010	LOC105222530(Max);LOC105222837(Egfr);LOC105223991(btl);LOC105224006(Hsc70-1);LOC105225067(drk);LOC105227058(Pak3);LOC105229860(PPP5C);LOC105231331(CACNA2D3);LOC105231830(Hsc70-2);LOC105232151(hep);LOC105234174(Flnc)	K04453+K04361+K05093+K03283+K04364+K04409+K04460+K04860+K03283+K04431+K04437
Human Diseases	Infectious diseases	Human papillomavirus infection	17	133	0.966157	1	ko05165	LOC105222837(Egfr);LOC105224427(BCAP31);LOC105225067(drk);LOC105225549(wg);LOC105225766(HDAC11);LOC105227172(SSPO);LOC105228649(Tret1-2);LOC105228699(mys);LOC105230174(Col1a2);LOC105231750(Atp6v0a1);LOC105232091(Axn);LOC105232161(Vha13);LOC105232483(Lama1);LOC105233251(PIK3CD);LOC105234044(mei-41);LOC115065999(dlg1);LOC115066525(Wnt4)	K04361+K14009+K04364+K03209+K11418+K03900+K06069+K05719+K19719+K02154+K02157+K02152+K05637+K00922+K06640+K12076+K01064
Organismal Systems	Circulatory system	Adrenergic signaling in cardiomyocytes	6	58	0.966629	1	ko04261	LOC105227411(Ac76E);LOC105229794(Mhc);LOC105231331(CACNA2D3);LOC105232923(Slc8a3);LOC105233425(Galphai);LOC109579326(Gnaq)	K08042+K17751+K04860+K05849+K04630+K04634
Genetic Information Processing	Replication and repair	Base excision repair	1	17	0.967462	1	ko03410	LOC105224341(Ogg1)	K03660
Human Diseases	Infectious diseases	African trypanosomiasis	1	17	0.967462	1	ko05143	LOC109579326(Gnaq)	K04634
Human Diseases	Cancers	Viral carcinogenesis	10	87	0.968847	1	ko05203	LOC105224755(Stat92E);LOC105225067(drk);LOC105225618(Actn);LOC105225766(HDAC11);LOC105229053(Cdk1);LOC105229334(dl);LOC105229886(Gel);LOC105230513(MAD1L1);LOC105233251(PIK3CD);LOC115065999(dlg1)	K11224+K04364+K05699+K11418+K02087+K09254+K05768+K06638+K00922+K12076
Organismal Systems	Immune system	Toll-like receptor signaling pathway	2	27	0.96962	1	ko04620	LOC105232151(hep);LOC105233251(PIK3CD)	K04431+K00922
Organismal Systems	Nervous system	Dopaminergic synapse	6	59	0.970513	1	ko04728	LOC105227310(DAT);LOC105232029(Gnb5);LOC105232251(Ggamma30A);LOC105233100(Grin2b);LOC105233425(Galphai);LOC109579326(Gnaq)	K05036+K04539+K04547+K05210+K04630+K04634
Organismal Systems	Circulatory system	Cardiac muscle contraction	3	36	0.971603	1	ko04260	LOC105229794(Mhc);LOC105231331(CACNA2D3);LOC105232923(Slc8a3)	K17751+K04860+K05849
Genetic Information Processing	Folding, sorting and degradation	Ubiquitin mediated proteolysis	9	81	0.97192	1	ko04120	LOC105224961(KLHL12);LOC105225495(Roc1b);LOC105226122(HERC2);LOC105228685(Det1);LOC105229988(CUL4B);LOC105230699(anapc13);LOC105232205(--);LOC105233714(sina);LOC105233949(Rchy1)	K10456+K03868+K10595+K10571+K10609+K12456+K10456+K04506+K10144
Organismal Systems	Nervous system	Neurotrophin signaling pathway	4	46	0.978438	1	ko04722	LOC105225067(drk);LOC105232048(csw);LOC105232151(hep);LOC105233251(PIK3CD)	K04364+K07293+K04431+K00922
Human Diseases	Endocrine and metabolic diseases	AGE-RAGE signaling pathway in diabetic complications	3	38	0.979156	1	ko04933	LOC105224755(Stat92E);LOC105225518(hop);LOC105233251(PIK3CD)	K11224+K04447+K00922
Environmental Information Processing	Signal transduction	Calcium signaling pathway	6	63	0.982243	1	ko04020	LOC105222837(Egfr);LOC105227411(Ac76E);LOC105229149(Nos);LOC105229770(Cyp1);LOC105232923(Slc8a3);LOC109579326(Gnaq)	K04361+K08042+K13240+K09565+K05849+K04634
Human Diseases	Drug resistance	Antifolate resistance	1	20	0.982259	1	ko01523	LOC105222766(Shmt1)	K00600
Organismal Systems	Immune system	IL-17 signaling pathway	1	20	0.982259	1	ko04657	LOC105226434(Hsp83)	K04079
Human Diseases	Cancers	MicroRNAs in cancer	6	64	0.984403	1	ko05206	LOC105222837(Egfr);LOC105224726(sem-2);LOC105224907(sn);LOC105225067(drk);LOC105226497(Mdr65);LOC105233251(PIK3CD)	K04361+K09268+K17455+K04364+K05658+K00922
Environmental Information Processing	Signal transduction	TGF-beta signaling pathway	2	31	0.984771	1	ko04350	LOC105225495(Roc1b);LOC105225728(Actbeta)	K03868+K22687
Organismal Systems	Nervous system	Retrograde endocannabinoid signaling	7	73	0.98698	1	ko04723	LOC105227411(Ac76E);LOC105228248(Dagla);LOC105231278(Grd);LOC105232029(Gnb5);LOC105232251(Ggamma30A);LOC105233425(Galphai);LOC109579326(Gnaq)	K08042+K13806+K05175+K04539+K04547+K04630+K04634
Organismal Systems	Endocrine system	Thyroid hormone signaling pathway	6	67	0.9895	1	ko04919	LOC105224618(Pfk);LOC105225768(MED16);LOC105228222(Act79B);LOC105229580(Act88F);LOC105229794(Mhc);LOC105233251(PIK3CD)	K00850+K15159+K05692+K05692+K17751+K00922
Organismal Systems	Aging	Longevity regulating pathway - mammal	3	43	0.990565	1	ko04211	LOC105227411(Ac76E);LOC105231914(Eif4e2);LOC105233251(PIK3CD)	K08042+K03259+K00922
Organismal Systems	Development	Axon guidance	5	60	0.990757	1	ko04360	LOC105227058(Pak3);LOC105228699(mys);LOC105232048(csw);LOC105233251(PIK3CD);LOC105233425(Galphai)	K04409+K05719+K07293+K00922+K04630
Cellular Processes	Cell growth and death	Cell cycle	7	76	0.991117	1	ko04110	LOC105225495(Roc1b);LOC105229053(Cdk1);LOC105230219(--);LOC105230513(MAD1L1);LOC105230699(anapc13);LOC105234044(mei-41);LOC105234066(--)	K03868+K02087+K13728+K06638+K12456+K06640+K02365
Organismal Systems	Sensory system	Inflammatory mediator regulation of TRP channels	3	44	0.991972	1	ko04750	LOC105227411(Ac76E);LOC105233251(PIK3CD);LOC109579326(Gnaq)	K08042+K00922+K04634
Cellular Processes	Cell growth and death	Oocyte meiosis	6	69	0.991976	1	ko04114	LOC105225495(Roc1b);LOC105227411(Ac76E);LOC105229053(Cdk1);LOC105230219(--);LOC105230699(anapc13);LOC105234066(--)	K03868+K08042+K02087+K13728+K12456+K02365
Organismal Systems	Excretory system	Aldosterone-regulated sodium reabsorption	1	24	0.992105	1	ko04960	LOC105233251(PIK3CD)	K00922
Organismal Systems	Excretory system	Endocrine and other factor-regulated calcium reabsorption	2	35	0.992471	1	ko04961	LOC105232923(Slc8a3);LOC109579326(Gnaq)	K05849+K04634
Human Diseases	Infectious diseases	Tuberculosis	5	62	0.993048	1	ko05152	LOC105225518(hop);LOC105230796(AAEL006169);LOC105230797(AAEL006169);LOC105230798(AAEL006169);LOC105231750(Atp6v0a1)	K04447+K01379+K01379+K01379+K02154
Organismal Systems	Digestive system	Mineral absorption	1	25	0.993553	1	ko04978	LOC105232923(Slc8a3)	K05849
Genetic Information Processing	Folding, sorting and degradation	Proteasome	2	37	0.99473	1	ko03050	LOC105223056(Psme3);LOC105233967(PSMB5)	K06698+K02737
Human Diseases	Substance dependence	Amphetamine addiction	2	37	0.99473	1	ko05031	LOC105227310(DAT);LOC105233100(Grin2b)	K05036+K05210
Human Diseases	Infectious diseases	Herpes simplex infection	5	65	0.995497	1	ko05168	LOC105225518(hop);LOC105225520(CG1785);LOC105229053(Cdk1);LOC105232048(csw);LOC105233361(SRSF7)	K04447+K14840+K02087+K07293+K12896
Organismal Systems	Digestive system	Salivary secretion	4	58	0.996438	1	ko04970	LOC105225976(Slc12a2);LOC105227411(Ac76E);LOC105229149(Nos);LOC109579326(Gnaq)	K10951+K08042+K13240+K04634
Organismal Systems	Nervous system	Synaptic vesicle cycle	3	49	0.996466	1	ko04721	LOC105231750(Atp6v0a1);LOC105232068(Rop);LOC105232161(Vha13)	K02154+K15292+K02152
Human Diseases	Infectious diseases	Hepatitis B	3	51	0.997469	1	ko05161	LOC105224755(Stat92E);LOC105225067(drk);LOC105233251(PIK3CD)	K11224+K04364+K00922
Organismal Systems	Endocrine system	Insulin secretion	3	52	0.99786	1	ko04911	LOC105227411(Ac76E);LOC109579191(SK);LOC109579326(Gnaq)	K08042+K04944+K04634
Organismal Systems	Nervous system	Long-term potentiation	2	42	0.997863	1	ko04720	LOC105233100(Grin2b);LOC109579326(Gnaq)	K05210+K04634
Environmental Information Processing	Signal transduction	mTOR signaling pathway	8	95	0.997964	1	ko04150	LOC105225067(drk);LOC105225090(Lrp6);LOC105225549(wg);LOC105229852(SLC3A2);LOC105231914(Eif4e2);LOC105232161(Vha13);LOC105233251(PIK3CD);LOC115066525(Wnt4)	K04364+K03068+K03209+K06519+K03259+K02152+K00922+K01064
Human Diseases	Infectious diseases	HTLV-I infection	9	103	0.998007	1	ko05166	LOC105224755(Stat92E);LOC105224983(Myb);LOC105225549(wg);LOC105227411(Ac76E);LOC105230724(FDPS);LOC105233251(PIK3CD);LOC105234044(mei-41);LOC115065999(dlg1);LOC115066525(Wnt4)	K11224+K09420+K03209+K08042+K00787+K00922+K06640+K12076+K01064
Environmental Information Processing	Signal transduction	VEGF signaling pathway	1	31	0.998091	1	ko04370	LOC105233251(PIK3CD)	K00922
Cellular Processes	Transport and catabolism	Autophagy - animal	7	91	0.998837	1	ko04140	LOC105226824(Cp1);LOC105229147(Mtmr14);LOC105230796(AAEL006169);LOC105230797(AAEL006169);LOC105230798(AAEL006169);LOC105232835(Ctla2a);LOC105233251(PIK3CD)	K01365+K18086+K01379+K01379+K01379+K01365+K00922
Cellular Processes	Cell growth and death	Cellular senescence	4	66	0.999	1	ko04218	LOC105226528(Hus1);LOC105229053(Cdk1);LOC105233251(PIK3CD);LOC105234044(mei-41)	K10903+K02087+K00922+K06640
Cellular Processes	Transport and catabolism	Endocytosis	9	109	0.999097	1	ko04144	LOC105222837(Egfr);LOC105223991(btl);LOC105224006(Hsc70-1);LOC105228450(Rabep1);LOC105228521(spartin);LOC105228649(Tret1-2);LOC105229989(Asap);LOC105231830(Hsc70-2);LOC105233528(Rab11fip2)	K04361+K05093+K03283+K12480+K19366+K06069+K12488+K03283+K12484
Genetic Information Processing	Replication and repair	DNA replication	1	35	0.999153	1	ko03030	LOC105223503(--)	K10740
Human Diseases	Infectious diseases	Epstein-Barr virus infection	7	98	0.999576	1	ko05169	LOC105223075(Polr1c);LOC105224006(Hsc70-1);LOC105225953(POLR2H);LOC105229053(Cdk1);LOC105231830(Hsc70-2);LOC105232151(hep);LOC105233251(PIK3CD)	K03027+K03283+K03016+K02087+K03283+K04431+K00922
Genetic Information Processing	Translation	Aminoacyl-tRNA biosynthesis	1	40	0.999694	1	ko00970	LOC105232704(LARS2)	K01869
Organismal Systems	Environmental adaptation	Thermogenesis	9	151	0.999998	1	ko04714	LOC105224678(SPAC19A8.14);LOC105225067(drk);LOC105227411(Ac76E);LOC105228222(Act79B);LOC105229580(Act88F);LOC105230125(--);LOC105230478(Npr1);LOC105233964(colt);MSTRG.8496(--)	K18177+K04364+K08042+K05692+K05692+K12323+K12323+K15109+K12323
Human Diseases	Neurodegenerative diseases	Huntington disease	8	146	0.999999	1	ko05016	LOC105224751(Dnai2);LOC105225028(GPXMC1);LOC105225953(POLR2H);LOC105229447(Sod1);LOC105229770(Cyp1);LOC105233100(Grin2b);LOC105234085(DNAL1);LOC109579326(Gnaq)	K11143+K00432+K03016+K04565+K09565+K05210+K10411+K04634
Human Diseases	Endocrine and metabolic diseases	Non-alcoholic fatty liver disease (NAFLD)	3	96	0.999999	1	ko04932	LOC105224081(Mlxipl);LOC105233251(PIK3CD);LOC105233985(SREBF2)	K09113+K00922+K07197
Human Diseases	Neurodegenerative diseases	Parkinson disease	3	100	1	1	ko05012	LOC105227310(DAT);LOC105229770(Cyp1);LOC105233425(Galphai)	K05036+K09565+K04630
Metabolism	Energy metabolism	Oxidative phosphorylation	2	109	1	1	ko00190	LOC105231750(Atp6v0a1);LOC105232161(Vha13)	K02154+K02152
Genetic Information Processing	Translation	Ribosome	1	123	1	1	ko03010	LOC105224390(rlp7)	K02937
Human Diseases	Neurodegenerative diseases	Alzheimer disease	4	123	1	1	ko05010	LOC105221970(pen-2);LOC105229149(Nos);LOC105233100(Grin2b);LOC109579326(Gnaq)	K06170+K13240+K05210+K04634

## Sheet: Rect-0d-vs-Rect-6d.path
KEGG_A_class	KEGG_B_class	Pathway	Rect-0d-vs-Rect-6d (590)	All (3263)	Pvalue	Qvalue	Pathway ID	Genes	K_IDs
Genetic Information Processing	Translation	Ribosome biogenesis in eukaryotes	36	66	1.6848e-11	5.32397e-09	ko03008	LOC105221856(REXO5);LOC105222115(wcd);LOC105222200(utp15);LOC105222326(TBL3);LOC105222593(PWP2);LOC105222801(Rrp7a);LOC105222975(Rtc1);LOC105223080(Ns1);LOC105223175(l(1)G0020);LOC105223338(Mat89Ba);LOC105224190(Rpp30);LOC105224199(--);LOC105224702(Nop60B);LOC105224740(POP1);LOC105224742(RIOK1);LOC105224868(BMS1);LOC105225104(Ak6);LOC105225240(Utp14a);LOC105225370(Rbm28);LOC105225430(MDN1);LOC105…	K14570+K14553+K14549+K14555+K14558+K14545+K11108+K14538+K14521+K14544+K03539+K14552+K11131+K01164+K07178+K14569+K18532+K14567+K14573+K14572+K11883+K12845+K14548+K14550+K14546+K14563+K14559+K11129+K11130+K14554+K14556+K14566+K14568+K14564+K14565+K11128
Metabolism	Global and overview maps	Metabolic pathways	207	877	7.2125e-07	0.000113958	ko01100	LOC105221826(KFase);LOC105221963(ALPL);LOC105222009(GlyP);LOC105222132(SGSH);LOC105222319(Inos);LOC105222459(CdsA);LOC105222518(ALN);LOC105222650(slgA);LOC105222689(Gld);LOC105222716(Prat);LOC105222766(Shmt1);LOC105222790(Spr);LOC105222926(Gdh);LOC105223075(Polr1c);LOC105223108(HMT-1);LOC105223186(Hex-t2);LOC105223311(AAO2);LOC105223314(AAO2);LOC105223573(RpI135);LOC105223612(TECR);LOC105223876(S…	K01432+K01077+K00688+K01565+K01858+K00981+K01466+K00318+K00115+K00764+K00600+K00072+K00261+K03027+K00547+K00844+K00106+K00106+K03002+K10258+K08764+K01001+K01937+K01937+K01135+K19269+K01915+K10251+K12657+K01697+K14455+K00128+K01047+K00002+K00281+K00850+K01077+K03022+K01077+K01077+K01183+K02684+K00031+K01580+K01555+K01074+K13247+K09658+K01251+K00993+K18532+K00710+K10249+K00819+K17497+K00669+K00901+…
Metabolism	Metabolism of terpenoids and polyketides	Insect hormone biosynthesis	18	37	1.91198e-05	0.00201395	ko00981	LOC105223819(SDR-1);LOC105223822(SDR-1);LOC105223827(SDR-1);LOC105224512(Aldh1b1);LOC105225181(PGLP2);LOC105225924(shd);LOC105227167(PKS19);LOC105227253(SDR-1);LOC105227881(SDR-1);LOC105227882(SDR-1);LOC105227938(SDR-1);LOC105228715(jhamt);LOC105229967(Ces2a);LOC105229968(Est-5A);LOC105230714(EH2);LOC105232720(--);LOC109579509(daf-36);LOC109580008(--)	K15890+K15890+K15890+K00128+K21013+K10723+K10718+K15890+K15890+K15890+K15890+K10718+K01063+K01063+K10719+K21013+K14938+K21013
Metabolism	Global and overview maps	Fatty acid metabolism	18	42	0.000154763	0.0120587	ko01212	LOC105223612(TECR);LOC105224237(hsd17b12a);LOC105224915(Ppt1);LOC105226742(Fasn);LOC105227875(ACADSB);LOC105229168(CG5009);LOC105229169(CG5009);LOC105230446(Acads);LOC105230729(CG5009);LOC105231230(HSDL1);LOC105231281(CG12262);LOC105231787(D11DS);LOC105232303(bgm);LOC105232304(CG4500);LOC105232306(CG4500);LOC105232621(ACAT2);LOC105233729(Scd1);LOC105234158(Oxsm)	K10258+K10251+K01074+K00665+K09478+K00232+K00232+K00248+K00232+K10251+K00249+K00507+K15013+K15013+K15013+K00626+K00507+K09458
Metabolism	Xenobiotics biodegradation and metabolism	Drug metabolism - cytochrome P450	22	57	0.000190802	0.0120587	ko00982	LOC105222104(GstD1);LOC105222427(GstD7);LOC105224360(MGST1);LOC105225812(GST1);LOC105225817(GstD1);LOC105225994(Gst4);LOC105227725(GST1);LOC105228691(GstS1);LOC105229681(GST1);LOC105229689(GST1);LOC105229690(GstD1);LOC105230262(UGT8);LOC105230268(Ugt1a1);LOC105230325(ugt3);LOC105230805(UGT2B13);LOC105231237(UGT2B15);LOC105232983(Adh);LOC105234081(MGST1);LOC109579500(GST1);LOC109579515(--);LOC1095…	K00799+K00799+K00799+K00799+K00799+K00799+K00799+K04097+K00799+K00799+K00799+K00699+K00699+K00699+K00699+K00699+K00001+K00799+K00799+K00699+K00699+K00799
Metabolism	Xenobiotics biodegradation and metabolism	Metabolism of xenobiotics by cytochrome P450	22	60	0.000448632	0.0221109	ko00980	LOC105222104(GstD1);LOC105222427(GstD7);LOC105224360(MGST1);LOC105225812(GST1);LOC105225817(GstD1);LOC105225994(Gst4);LOC105227725(GST1);LOC105228691(GstS1);LOC105229681(GST1);LOC105229689(GST1);LOC105229690(GstD1);LOC105230262(UGT8);LOC105230268(Ugt1a1);LOC105230325(ugt3);LOC105230805(UGT2B13);LOC105231237(UGT2B15);LOC105232983(Adh);LOC105234081(MGST1);LOC109579500(GST1);LOC109579515(--);LOC1095…	K00799+K00799+K00799+K00799+K00799+K00799+K00799+K04097+K00799+K00799+K00799+K00699+K00699+K00699+K00699+K00699+K00001+K00799+K00799+K00699+K00699+K00799
Metabolism	Xenobiotics biodegradation and metabolism	Drug metabolism - other enzymes	28	84	0.000492435	0.0221109	ko00983	LOC105222104(GstD1);LOC105222427(GstD7);LOC105223311(AAO2);LOC105223314(AAO2);LOC105224360(MGST1);LOC105225812(GST1);LOC105225817(GstD1);LOC105225994(Gst4);LOC105226045(UPP1);LOC105227725(GST1);LOC105228611(ras);LOC105229681(GST1);LOC105229689(GST1);LOC105229690(GstD1);LOC105230262(UGT8);LOC105230268(Ugt1a1);LOC105230325(ugt3);LOC105230669(RnrS);LOC105230805(UGT2B13);LOC105231050(UPP1);LOC1052312…	K00799+K00799+K00106+K00106+K00799+K00799+K00799+K00799+K00757+K00799+K00088+K00799+K00799+K00799+K00699+K00699+K00699+K10808+K00699+K00757+K00699+K13421+K00757+K00799+K00799+K00699+K00699+K00799
Human Diseases	Cancers	Chemical carcinogenesis	21	57	0.00055977	0.0221109	ko05204	LOC105222104(GstD1);LOC105222427(GstD7);LOC105224360(MGST1);LOC105225812(GST1);LOC105225817(GstD1);LOC105225994(Gst4);LOC105227725(GST1);LOC105228691(GstS1);LOC105229681(GST1);LOC105229689(GST1);LOC105229690(GstD1);LOC105230262(UGT8);LOC105230268(Ugt1a1);LOC105230325(ugt3);LOC105230805(UGT2B13);LOC105231237(UGT2B15);LOC105234081(MGST1);LOC109579500(GST1);LOC109579515(--);LOC109579516(--);MSTRG.67…	K00799+K00799+K00799+K00799+K00799+K00799+K00799+K04097+K00799+K00799+K00799+K00699+K00699+K00699+K00699+K00699+K00799+K00799+K00699+K00699+K00799
Metabolism	Metabolism of other amino acids	Glutathione metabolism	21	59	0.000948247	0.033294	ko00480	LOC105222104(GstD1);LOC105222427(GstD7);LOC105224360(MGST1);LOC105224810(Idh1);LOC105224880(se);LOC105225028(GPXMC1);LOC105225812(GST1);LOC105225817(GstD1);LOC105225994(Gst4);LOC105227725(GST1);LOC105228691(GstS1);LOC105229681(GST1);LOC105229689(GST1);LOC105229690(GstD1);LOC105229822(GCLM);LOC105230669(RnrS);LOC105230937(Anpep);LOC105234081(MGST1);LOC109579500(GST1);LOC115065834(Ggct);MSTRG.6737(…	K00799+K00799+K00799+K00031+K00310+K00432+K00799+K00799+K00799+K00799+K04097+K00799+K00799+K00799+K11205+K10808+K11140+K00799+K00799+K00682+K00799
Human Diseases	Cardiovascular diseases	Hypertrophic cardiomyopathy (HCM)	13	30	0.00113485	0.0358612	ko05410	LOC105225453(Act57B);LOC105226582(Tm1);LOC105226992(sls);LOC105228222(Act79B);LOC105229185(--);LOC105229794(Mhc);LOC105232276(Acer);LOC105232277(Ance);LOC105232421(Cacna2d3);LOC105232483(Lama1);LOC105232878(ACE);LOC105232922(SLC8A1);LOC105232923(Slc8a3)	K05692+K10373+K12567+K05692+K01283+K17751+K01283+K01283+K04861+K05637+K01283+K05849+K05849
Human Diseases	Cardiovascular diseases	Fluid shear stress and atherosclerosis	25	77	0.00149949	0.0430761	ko05418	LOC105222104(GstD1);LOC105222427(GstD7);LOC105224360(MGST1);LOC105224961(KLHL12);LOC105225287(Eip63F-1);LOC105225453(Act57B);LOC105225812(GST1);LOC105225817(GstD1);LOC105225994(Gst4);LOC105226171(Txn2);LOC105226434(Hsp83);LOC105226824(Cp1);LOC105227725(GST1);LOC105228222(Act79B);LOC105229164(Sdc);LOC105229681(GST1);LOC105229689(GST1);LOC105229690(GstD1);LOC105232151(hep);LOC105232205(--);LOC10523…	K00799+K00799+K00799+K10456+K02183+K05692+K00799+K00799+K00799+K03671+K04079+K01365+K00799+K05692+K16336+K00799+K00799+K00799+K04431+K10456+K01365+K05704+K00799+K00799+K00799
Metabolism	Lipid metabolism	Glycerophospholipid metabolism	19	55	0.00245011	0.0645196	ko00564	LOC105222107(Taz);LOC105222459(CdsA);LOC105222526(nes);LOC105224532(PLA2);LOC105225068(chpt1);LOC105225548(rdgA);LOC105225662(Gpd2);LOC105227191(PTDSS1);LOC105227365(PLA2G12B);LOC105227484(eas);LOC105227610(Pisd);LOC105227846(PLPP1);LOC105227847(PLPP3);LOC105227848(PLPP1);LOC105229745(CG8745);LOC105230334(CG34384);LOC105232328(SELENOI);LOC105232613(Dgkq);LOC105233389(SELENOI)	K13511+K00981+K13515+K01047+K00993+K00901+K00111+K08729+K01047+K00894+K01613+K01080+K01080+K01080+K14286+K00901+K00993+K00901+K00993
Metabolism	Metabolism of cofactors and vitamins	Thiamine metabolism	9	19	0.00319782	0.0777316	ko00730	LOC105221963(ALPL);LOC105224718(Alp-m);LOC105224766(ALPPL2);LOC105224767(Alp-m);LOC105226111(Alp-m);LOC105226149(ALPL);LOC105226349(stp1);LOC105227008(Alp4);LOC105231851(--)	K01077+K01077+K01077+K01077+K01077+K01077+K14394+K01077+K01077
Metabolism	Metabolism of cofactors and vitamins	Folate biosynthesis	13	34	0.00433937	0.0979459	ko00790	LOC105221963(ALPL);LOC105222790(Spr);LOC105224718(Alp-m);LOC105224766(ALPPL2);LOC105224767(Alp-m);LOC105224880(se);LOC105226111(Alp-m);LOC105226149(ALPL);LOC105227008(Alp4);LOC105228657(Pu);LOC105229079(Mocs1);LOC105231029(Pcd);LOC105231851(--)	K01077+K00072+K01077+K01077+K01077+K00310+K01077+K01077+K01077+K01495+K20967+K01724+K01077
Metabolism	Glycan biosynthesis and metabolism	Mucin type O-glycan biosynthesis	9	20	0.00489801	0.103185	ko00512	LOC105225146(pgant6);LOC105225671(C1GalTA);LOC105225674(C1GalTA);LOC105226423(GALNT14);LOC105226683(gly-5);LOC105226711(gly-5);LOC105229056(C1GalTA);LOC105229249(pgant2);LOC105233760(pgant4)	K00710+K00731+K00731+K00710+K00710+K00710+K00731+K00710+K00710
Metabolism	Lipid metabolism	Biosynthesis of unsaturated fatty acids	8	17	0.00571294	0.107624	ko01040	LOC105223612(TECR);LOC105224237(hsd17b12a);LOC105229168(CG5009);LOC105229169(CG5009);LOC105230729(CG5009);LOC105231230(HSDL1);LOC105231787(D11DS);LOC105233729(Scd1)	K10258+K10251+K00232+K00232+K00232+K10251+K00507+K00507
Metabolism	Glycan biosynthesis and metabolism	N-Glycan biosynthesis	13	35	0.00578992	0.107624	ko00510	LOC105223889(Dpagt1);LOC105225030(--);LOC105225560(Alg14);LOC105225767(Mgat2);LOC105226794(Alg13);LOC105228793(Ganab);LOC105228919(mgat4b);LOC105229271(wol);LOC105229896(--);LOC105230239(st6gal2);LOC105232327(CG10166);LOC105233977(alg11);LOC109579495(l(2)k12914)	K01001+K09658+K07441+K00736+K07432+K05546+K00738+K00729+K09659+K00778+K00721+K03844+K12668
Organismal Systems	Aging	Longevity regulating pathway - worm	23	77	0.00735043	0.129041	ko04212	LOC105222104(GstD1);LOC105222427(GstD7);LOC105222720(wat);LOC105224360(MGST1);LOC105225812(GST1);LOC105225817(GstD1);LOC105225825(wat);LOC105225994(Gst4);LOC105226693(far1);LOC105227725(GST1);LOC105228879(FAR1);LOC105229681(GST1);LOC105229689(GST1);LOC105229690(GstD1);LOC105230858(far1);LOC105231787(D11DS);LOC105233729(Scd1);LOC105233742(foxo);LOC105234081(MGST1);LOC105234144(foxo);LOC109579500(G…	K00799+K00799+K13356+K00799+K00799+K00799+K13356+K00799+K13356+K00799+K13356+K00799+K00799+K00799+K13356+K00507+K00507+K09408+K00799+K09408+K00799+K14938+K00799
Cellular Processes	Transport and catabolism	Peroxisome	22	77	0.0149378	0.248439	ko04146	LOC105222720(wat);LOC105223311(AAO2);LOC105223314(AAO2);LOC105223876(SCP2);LOC105224676(Hacl1);LOC105224810(Idh1);LOC105225825(wat);LOC105226631(--);LOC105226693(far1);LOC105227584(Crot);LOC105228282(Mfe2);LOC105228879(FAR1);LOC105229168(CG5009);LOC105229169(CG5009);LOC105229424(mpv17l);LOC105229447(Sod1);LOC105230729(CG5009);LOC105230858(far1);LOC105233107(MPV17L);LOC105233108(--);LOC105233109(M…	K13356+K00106+K00106+K08764+K12261+K00031+K13356+K13349+K13356+K05940+K12405+K13356+K00232+K00232+K13349+K04565+K00232+K13356+K13348+K13348+K13348+K00624
Organismal Systems	Endocrine system	Renin-angiotensin system	6	13	0.0185242	0.272325	ko04614	LOC105229185(--);LOC105230937(Anpep);LOC105232276(Acer);LOC105232277(Ance);LOC105232878(ACE);LOC105233746(ANPEP)	K01283+K11140+K01283+K01283+K01283+K11141
Metabolism	Lipid metabolism	Fatty acid degradation	12	36	0.0200696	0.272325	ko00071	LOC105224512(Aldh1b1);LOC105227875(ACADSB);LOC105229168(CG5009);LOC105229169(CG5009);LOC105230446(Acads);LOC105230729(CG5009);LOC105231281(CG12262);LOC105232303(bgm);LOC105232304(CG4500);LOC105232306(CG4500);LOC105232621(ACAT2);LOC105232983(Adh)	K00128+K09478+K00232+K00232+K00248+K00232+K00249+K15013+K15013+K15013+K00626+K00001
Organismal Systems	Endocrine system	PPAR signaling pathway	12	36	0.0200696	0.272325	ko03320	LOC105223876(SCP2);LOC105229168(CG5009);LOC105229169(CG5009);LOC105230729(CG5009);LOC105231281(CG12262);LOC105231787(D11DS);LOC105232191(Pepck);LOC105232303(bgm);LOC105232304(CG4500);LOC105232306(CG4500);LOC105233729(Scd1);MSTRG.2113(SLC27A4)	K08764+K00232+K00232+K00232+K00249+K00507+K01596+K15013+K15013+K15013+K00507+K08745
Metabolism	Glycan biosynthesis and metabolism	Mannose type O-glycan biosyntheis	3	4	0.0203679	0.272325	ko00515	LOC105225562(tw);LOC105227401(rt);LOC105228140(gnt14)	K00728+K00728+K21032
Metabolism	Lipid metabolism	Fatty acid biosynthesis	5	10	0.0215447	0.272325	ko00061	LOC105226742(Fasn);LOC105232303(bgm);LOC105232304(CG4500);LOC105232306(CG4500);LOC105234158(Oxsm)	K00665+K15013+K15013+K15013+K09458
Metabolism	Lipid metabolism	Cutin, suberine and wax biosynthesis	5	10	0.0215447	0.272325	ko00073	LOC105222720(wat);LOC105225825(wat);LOC105226693(far1);LOC105228879(FAR1);LOC105230858(far1)	K13356+K13356+K13356+K13356+K13356
Metabolism	Lipid metabolism	Ether lipid metabolism	8	22	0.0324577	0.384894	ko00565	LOC105224532(PLA2);LOC105225068(chpt1);LOC105227365(PLA2G12B);LOC105227846(PLPP1);LOC105227847(PLPP3);LOC105227848(PLPP1);LOC105232328(SELENOI);LOC105233389(SELENOI)	K01047+K00993+K01047+K01080+K01080+K01080+K00993+K00993
Organismal Systems	Digestive system	Fat digestion and absorption	9	26	0.0328865	0.384894	ko04975	LOC105224406(GOT2);LOC105224532(PLA2);LOC105227365(PLA2G12B);LOC105227846(PLPP1);LOC105227847(PLPP3);LOC105227848(PLPP1);LOC105230785(DGAT1);LOC105232621(ACAT2);MSTRG.2113(SLC27A4)	K14455+K01047+K01047+K01080+K01080+K01080+K11155+K00626+K08745
Human Diseases	Drug resistance	Platinum drug resistance	14	48	0.0398547	0.437451	ko01524	LOC105222104(GstD1);LOC105222427(GstD7);LOC105224360(MGST1);LOC105225812(GST1);LOC105225817(GstD1);LOC105225994(Gst4);LOC105227725(GST1);LOC105229681(GST1);LOC105229689(GST1);LOC105229690(GstD1);LOC105231062(--);LOC105234081(MGST1);LOC109579500(GST1);MSTRG.6737(GstD1)	K00799+K00799+K00799+K00799+K00799+K00799+K00799+K00799+K00799+K00799+K14686+K00799+K00799+K00799
Human Diseases	Immune diseases	Systemic lupus erythematosus	4	8	0.0401458	0.437451	ko05322	LOC105221965(SmD3);LOC105225618(Actn);LOC105233100(Grin2b);LOC109580066(--)	K11088+K05699+K05210+K05210
Metabolism	Metabolism of other amino acids	Phosphonate and phosphinate metabolism	3	5	0.0441132	0.464659	ko00440	LOC105225068(chpt1);LOC105232328(SELENOI);LOC105233389(SELENOI)	K00993+K00993+K00993
Metabolism	Glycan biosynthesis and metabolism	Other types of O-glycan biosynthesis	5	12	0.0494568	0.47631	ko00514	LOC105224723(GA16561);LOC105225106(Eogt);LOC105225562(tw);LOC105227401(rt);LOC105230239(st6gal2)	K11703+K18134+K00728+K00728+K00778
Metabolism	Metabolism of terpenoids and polyketides	Terpenoid backbone biosynthesis	10	32	0.0498464	0.47631	ko00900	LOC105223819(SDR-1);LOC105223822(SDR-1);LOC105223827(SDR-1);LOC105227253(SDR-1);LOC105227881(SDR-1);LOC105227882(SDR-1);LOC105227938(SDR-1);LOC105230724(FDPS);LOC105232621(ACAT2);LOC105232728(PDSS2)	K15890+K15890+K15890+K15890+K15890+K15890+K15890+K00787+K00626+K12505
Metabolism	Lipid metabolism	Steroid hormone biosynthesis	9	28	0.0519714	0.47631	ko00140	LOC105224237(hsd17b12a);LOC105230262(UGT8);LOC105230268(Ugt1a1);LOC105230325(ugt3);LOC105230805(UGT2B13);LOC105231230(HSDL1);LOC105231237(UGT2B15);LOC109579515(--);LOC109579516(--)	K10251+K00699+K00699+K00699+K00699+K10251+K00699+K00699+K00699
Human Diseases	Cardiovascular diseases	Dilated cardiomyopathy (DCM)	9	28	0.0519714	0.47631	ko05414	LOC105225453(Act57B);LOC105226582(Tm1);LOC105226992(sls);LOC105228222(Act79B);LOC105229794(Mhc);LOC105232421(Cacna2d3);LOC105232483(Lama1);LOC105232922(SLC8A1);LOC105232923(Slc8a3)	K05692+K10373+K12567+K05692+K17751+K04861+K05637+K05849+K05849
Metabolism	Lipid metabolism	Fatty acid elongation	6	16	0.0533197	0.47631	ko00062	LOC105223612(TECR);LOC105224237(hsd17b12a);LOC105224915(Ppt1);LOC105225208(eloF);LOC105226450(eloF);LOC105231230(HSDL1)	K10258+K10251+K01074+K10249+K10249+K10251
Metabolism	Carbohydrate metabolism	Pentose phosphate pathway	7	20	0.0542632	0.47631	ko00030	LOC105222689(Gld);LOC105224618(Pfk);LOC105228097(Pgi);LOC105228163(Taldo);LOC105228674(CG17333);LOC105229143(Tktl2);LOC105230177(Rpia)	K00115+K00850+K01810+K00616+K01057+K00615+K01807
Metabolism	Amino acid metabolism	Arginine and proline metabolism	11	37	0.0569524	0.486404	ko00330	LOC105222650(slgA);LOC105224260(Aldh18a1);LOC105224406(GOT2);LOC105224512(Aldh1b1);LOC105225237(Oat);LOC105226778(P4HA2);LOC105231755(P4HA2);LOC105231756(P4HA1);LOC105231760(P4HA1);LOC105232635(Argk);LOC105233770(PYCR1)	K00318+K12657+K14455+K00128+K00819+K00472+K00472+K00472+K00472+K00933+K00286
Organismal Systems	Endocrine system	Renin secretion	10	33	0.0604154	0.502401	ko04924	LOC105225287(Eip63F-1);LOC105226958(CanA-14F);LOC105229185(--);LOC105230125(--);LOC105230478(Npr1);LOC105232276(Acer);LOC105232277(Ance);LOC105232878(ACE);LOC109579326(Gnaq);MSTRG.8496(--)	K02183+K04348+K01283+K12323+K12323+K01283+K01283+K01283+K04634+K12323
Metabolism	Lipid metabolism	alpha-Linolenic acid metabolism	5	13	0.0687897	0.531601	ko00592	LOC105224532(PLA2);LOC105227365(PLA2G12B);LOC105229168(CG5009);LOC105229169(CG5009);LOC105230729(CG5009)	K01047+K01047+K00232+K00232+K00232
Environmental Information Processing	Membrane transport	ABC transporters	5	13	0.0687897	0.531601	ko02010	LOC105222965(ABCA3);LOC105223845(Abcb1a);LOC105226497(Mdr65);LOC105230756(ABCG1);LOC105231580(l(2)03659)	K05643+K05658+K05658+K05679+K05673
Metabolism	Amino acid metabolism	Tyrosine metabolism	7	21	0.0691931	0.531601	ko00350	LOC105224406(GOT2);LOC105224873(FAH);LOC105231903(yellow-f2);LOC105232983(Adh);LOC105233819(hgo);LOC105234241(amd);LOC115066680(hgo)	K14455+K01555+K22203+K00001+K00451+K01618+K00451
Human Diseases	Cancers	Hepatocellular carcinoma	23	94	0.0709658	0.531601	ko05225	LOC105222104(GstD1);LOC105222427(GstD7);LOC105224360(MGST1);LOC105224961(KLHL12);LOC105225067(drk);LOC105225090(Lrp6);LOC105225453(Act57B);LOC105225812(GST1);LOC105225817(GstD1);LOC105225994(Gst4);LOC105226202(Wnt5);LOC105227725(GST1);LOC105228222(Act79B);LOC105229681(GST1);LOC105229689(GST1);LOC105229690(GstD1);LOC105232091(Axn);LOC105232205(--);LOC105233659(GADD45A);LOC105234081(MGST1);LOC10957…	K00799+K00799+K00799+K10456+K04364+K03068+K05692+K00799+K00799+K00799+K00444+K00799+K05692+K00799+K00799+K00799+K02157+K10456+K04402+K00799+K00799+K01064+K00799
Metabolism	Metabolism of cofactors and vitamins	Retinol metabolism	10	34	0.0723381	0.531601	ko00830	LOC105229342(Sdr16c6);LOC105230262(UGT8);LOC105230268(Ugt1a1);LOC105230325(ugt3);LOC105230785(DGAT1);LOC105230805(UGT2B13);LOC105231237(UGT2B15);LOC105232983(Adh);LOC109579515(--);LOC109579516(--)	K15734+K00699+K00699+K00699+K11155+K00699+K00699+K00001+K00699+K00699
Metabolism	Carbohydrate metabolism	Amino sugar and nucleotide sugar metabolism	13	48	0.0790982	0.568068	ko00520	LOC105223186(Hex-t2);LOC105224788(Cht2);LOC105225298(CG10688);LOC105226345(CHIA);LOC105227416(cyb5r2);LOC105228097(Pgi);LOC105230995(Nagk);LOC105231918(GFPT2);LOC105232357(Cht10);LOC105232601(CG1969);LOC105233016(CMAS);LOC105233418(sgl);LOC105233954(Uap1)	K00844+K01183+K17497+K01183+K00326+K01810+K00884+K00820+K01183+K00621+K21749+K00012+K00972
Metabolism	Nucleotide metabolism	Purine metabolism	29	125	0.0839505	0.579371	ko00230	LOC105222518(ALN);LOC105222716(Prat);LOC105223075(Polr1c);LOC105223311(AAO2);LOC105223314(AAO2);LOC105223573(RpI135);LOC105224743(Polr3h);LOC105224807(DNApol-alpha50);LOC105225104(Ak6);LOC105225623(Prat);LOC105226353(ada2);LOC105226526(RpI1);LOC105226786(--);LOC105227488(SPCC285.04);LOC105227970(PNP);LOC105228611(ras);LOC105229025(Aprt);LOC105230125(--);LOC105230238(Gyc89Db);LOC105230331(Gucy2f);…	K01466+K00764+K03027+K00106+K00106+K03002+K03022+K02684+K18532+K00764+K19572+K02999+K03005+K07127+K03783+K00088+K00759+K12323+K01769+K12322+K12323+K10808+K13298+K02685+K19572+K19572+K01587+K03004+K12323
Metabolism	Lipid metabolism	Primary bile acid biosynthesis	2	3	0.0861722	0.579371	ko00120	LOC105223876(SCP2);LOC105228282(Mfe2)	K08764+K12405
Organismal Systems	Immune system	Complement and coagulation cascades	2	3	0.0861722	0.579371	ko04610	LOC105227172(SSPO);LOC105229510(F11)	K03900+K01323
Human Diseases	Cardiovascular diseases	Arrhythmogenic right ventricular cardiomyopathy (ARVC)	6	18	0.0899478	0.585705	ko05412	LOC105225453(Act57B);LOC105228222(Act79B);LOC105232421(Cacna2d3);LOC105232483(Lama1);LOC105232922(SLC8A1);LOC105232923(Slc8a3)	K05692+K05692+K04861+K05637+K05849+K05849
Human Diseases	Cancers	Prostate cancer	16	63	0.0908213	0.585705	ko05215	LOC105222104(GstD1);LOC105222427(GstD7);LOC105223991(btl);LOC105224360(MGST1);LOC105225067(drk);LOC105225812(GST1);LOC105225817(GstD1);LOC105225994(Gst4);LOC105226434(Hsp83);LOC105227725(GST1);LOC105229681(GST1);LOC105229689(GST1);LOC105229690(GstD1);LOC105234081(MGST1);LOC109579500(GST1);MSTRG.6737(GstD1)	K00799+K00799+K05093+K00799+K04364+K00799+K00799+K00799+K04079+K00799+K00799+K00799+K00799+K00799+K00799+K00799
Metabolism	Carbohydrate metabolism	Ascorbate and aldarate metabolism	9	32	0.108621	0.686487	ko00053	LOC105224512(Aldh1b1);LOC105230262(UGT8);LOC105230268(Ugt1a1);LOC105230325(ugt3);LOC105230805(UGT2B13);LOC105231237(UGT2B15);LOC105233418(sgl);LOC109579515(--);LOC109579516(--)	K00128+K00699+K00699+K00699+K00699+K00699+K00012+K00699+K00699
Cellular Processes	Transport and catabolism	Lysosome	24	105	0.123736	0.76668	ko04142	LOC105222101(--);LOC105222132(SGSH);LOC105223150(CG17119);LOC105224017(Arsb);LOC105224023(CLN3);LOC105224194(Lip1);LOC105224212(Lip1);LOC105224582(--);LOC105224915(Ppt1);LOC105225659(GLB1);LOC105226747(GBA);LOC105226761(--);LOC105226824(Cp1);LOC105227741(NAGA);LOC105227766(Cd53);LOC105227818(ATP6V0A1);LOC105227880(mfsd8);LOC105228814(HGSNAT);LOC105230050(BRAFLDRAFT_56888);LOC105231749(ATP6V0A1);L…	K06564+K01565+K12386+K01135+K12389+K01052+K01052+K19363+K01074+K12309+K01201+K13443+K01365+K01189+K06497+K02154+K12307+K10532+K01206+K02154+K02154+K01192+K12311+K01365
Metabolism	Amino acid metabolism	Alanine, aspartate and glutamate metabolism	7	24	0.127116	0.772477	ko00250	LOC105222716(Prat);LOC105222926(Gdh);LOC105224138(Gs2);LOC105224406(GOT2);LOC105224871(Gad1);LOC105225623(Prat);LOC105231918(GFPT2)	K00764+K00261+K01915+K14455+K01580+K00764+K00820
Metabolism	Glycan biosynthesis and metabolism	Other glycan degradation	6	20	0.137171	0.817847	ko00511	LOC105225659(GLB1);LOC105226747(GBA);LOC105230050(BRAFLDRAFT_56888);LOC105230961(HEXDC);LOC105231812(MANBA);LOC105232311(MAN2B1)	K12309+K01201+K01206+K14459+K01192+K12311
Metabolism	Metabolism of cofactors and vitamins	Biotin metabolism	2	4	0.151977	0.873175	ko00780	LOC105232645(vanin-like);LOC105234158(Oxsm)	K01435+K09458
Organismal Systems	Sensory system	Phototransduction	2	4	0.151977	0.873175	ko04744	LOC105225287(Eip63F-1);LOC105230331(Gucy2f)	K02183+K12322
Metabolism	Lipid metabolism	Steroid biosynthesis	3	8	0.16224	0.915497	ko00100	LOC105223844(Soat1);LOC105224194(Lip1);LOC105224212(Lip1)	K00637+K01052+K01052
Metabolism	Amino acid metabolism	Glycine, serine and threonine metabolism	7	26	0.175867	0.936682	ko00260	LOC105222766(Shmt1);LOC105224361(CBSL);LOC105224599(Gldc);LOC105226796(THA2);LOC105228244(GNMT);LOC105228945(Sardh);LOC105229638(Gld)	K00600+K01697+K00281+K01620+K00552+K00314+K00108
Metabolism	Lipid metabolism	Sphingolipid metabolism	7	26	0.175867	0.936682	ko00600	LOC105225659(GLB1);LOC105226747(GBA);LOC105227741(NAGA);LOC105227846(PLPP1);LOC105227847(PLPP3);LOC105227848(PLPP1);LOC105231761(CDase)	K12309+K01201+K01189+K01080+K01080+K01080+K12349
Human Diseases	Substance dependence	Alcoholism	11	45	0.176338	0.936682	ko05034	LOC105225067(drk);LOC105225287(Eip63F-1);LOC105225766(HDAC11);LOC105227310(DAT);LOC105228592(flw);LOC105229760(HDAC6);LOC105230245(Pp1alpha-96A);LOC105232029(Gnb5);LOC105232251(Ggamma30A);LOC105233100(Grin2b);LOC109580066(--)	K04364+K02183+K11418+K05036+K06269+K11407+K06269+K04539+K04547+K05210+K05210
Organismal Systems	Sensory system	Taste transduction	5	17	0.179488	0.936682	ko04742	LOC105221829(Gabbr1);LOC105224042(Grd);LOC105230554(5-HT1B);LOC105230555(5-HT1A);LOC105232251(Ggamma30A)	K04615+K05175+K04153+K04153+K04547
Human Diseases	Immune diseases	Autoimmune thyroid disease	1	1	0.180815	0.936682	ko05320	LOC105226623(TSHR)	K04249
Organismal Systems	Immune system	Toll and Imd signaling pathway	18	80	0.18423	0.938978	ko04624	LOC105222535(GNBP1);LOC105226057(--);LOC105226802(ea);LOC105227455(etaTry);LOC105229334(dl);LOC105231286(PGRP-SD);LOC105231288(PGRP-LF);LOC105231663(PGRP-LB);LOC105231777(CEC1);LOC105231782(CEC1);LOC105232010(GNBP3);LOC105232011(GNBP3);LOC105232151(hep);LOC105232814(Hayan);LOC105233457(spz);LOC109579906(--);LOC115066596(Cfi);LOC115066711(--)	K20697+K10380+K20672+K20676+K09254+K01446+K01446+K01446+K20696+K20696+K20692+K20692+K04431+K20675+K20694+K10380+K20671+K20694
Metabolism	Metabolism of cofactors and vitamins	Pantothenate and CoA biosynthesis	4	13	0.195788	0.973303	ko00770	LOC105227635(Ppcs);LOC105227904(PANK1);LOC105232139(vanin-like);LOC105232140(vanin-like)	K01922+K09680+K08069+K08069
Environmental Information Processing	Signal transduction	cAMP signaling pathway	17	76	0.199994	0.973303	ko04024	LOC105221829(Gabbr1);LOC105225287(Eip63F-1);LOC105226623(TSHR);LOC105227058(Pak3);LOC105228592(flw);LOC105229168(CG5009);LOC105229169(CG5009);LOC105230125(--);LOC105230245(Pp1alpha-96A);LOC105230478(Npr1);LOC105230554(5-HT1B);LOC105230555(5-HT1A);LOC105230729(CG5009);LOC105231580(l(2)03659);LOC105233100(Grin2b);LOC109580066(--);MSTRG.8496(--)	K04615+K02183+K04249+K04409+K06269+K00232+K00232+K12323+K06269+K12323+K04153+K04153+K00232+K05673+K05210+K05210+K12323
Environmental Information Processing	Signal transduction	cGMP - PKG signaling pathway	14	61	0.200205	0.973303	ko04022	LOC105225287(Eip63F-1);LOC105226958(CanA-14F);LOC105228592(flw);LOC105229770(Cyp1);LOC105229794(Mhc);LOC105230125(--);LOC105230245(Pp1alpha-96A);LOC105230478(Npr1);LOC105231569(Pkc98E);LOC105231615(pnr);LOC105232922(SLC8A1);LOC105232923(Slc8a3);LOC109579326(Gnaq);MSTRG.8496(--)	K02183+K04348+K06269+K09565+K17751+K12323+K06269+K12323+K18050+K09183+K05849+K05849+K04634+K12323
Human Diseases	Substance dependence	Nicotine addiction	3	9	0.212278	1	ko05033	LOC105224042(Grd);LOC105233100(Grin2b);LOC109580066(--)	K05175+K05210+K05210
Organismal Systems	Immune system	Antigen processing and presentation	5	18	0.213926	1	ko04612	LOC105224006(Hsc70-1);LOC105226434(Hsp83);LOC105226824(Cp1);LOC105231830(Hsc70-2);LOC105232835(Ctla2a)	K03283+K04079+K01365+K03283+K01365
Organismal Systems	Digestive system	Bile secretion	11	47	0.217418	1	ko04976	LOC105223845(Abcb1a);LOC105226497(Mdr65);LOC105230262(UGT8);LOC105230268(Ugt1a1);LOC105230325(ugt3);LOC105230805(UGT2B13);LOC105231156(SLC9A3);LOC105231237(UGT2B15);LOC105231580(l(2)03659);LOC109579515(--);LOC109579516(--)	K05658+K05658+K00699+K00699+K00699+K00699+K12040+K00699+K05673+K00699+K00699
Human Diseases	Neurodegenerative diseases	Amyotrophic lateral sclerosis (ALS)	7	28	0.231259	1	ko05014	LOC105224409(Der-1);LOC105225028(GPXMC1);LOC105225557(Tom40);LOC105226958(CanA-14F);LOC105229447(Sod1);LOC105233100(Grin2b);LOC109580066(--)	K11519+K00432+K11518+K04348+K04565+K05210+K05210
Metabolism	Lipid metabolism	Arachidonic acid metabolism	4	14	0.237428	1	ko00590	LOC105224532(PLA2);LOC105225028(GPXMC1);LOC105227365(PLA2G12B);LOC105228691(GstS1)	K01047+K00432+K01047+K04097
Metabolism	Lipid metabolism	Glycerolipid metabolism	10	43	0.238907	1	ko00561	LOC105224512(Aldh1b1);LOC105224588(AKR1A1);LOC105225548(rdgA);LOC105227741(NAGA);LOC105227846(PLPP1);LOC105227847(PLPP3);LOC105227848(PLPP1);LOC105230334(CG34384);LOC105230785(DGAT1);LOC105232613(Dgkq)	K00128+K00002+K00901+K01189+K01080+K01080+K01080+K00901+K11155+K00901
Metabolism	Amino acid metabolism	Tryptophan metabolism	5	19	0.250222	1	ko00380	LOC105221826(KFase);LOC105224512(Aldh1b1);LOC105225353(AANAT1);LOC105228982(cn);LOC105232621(ACAT2)	K01432+K00128+K00669+K00486+K00626
Metabolism	Carbohydrate metabolism	Pentose and glucuronate interconversions	11	49	0.261986	1	ko00040	LOC105224588(AKR1A1);LOC105224947(Cryl1);LOC105228312(DCXR);LOC105230262(UGT8);LOC105230268(Ugt1a1);LOC105230325(ugt3);LOC105230805(UGT2B13);LOC105231237(UGT2B15);LOC105233418(sgl);LOC109579515(--);LOC109579516(--)	K00002+K13247+K03331+K00699+K00699+K00699+K00699+K00699+K00012+K00699+K00699
Metabolism	Glycan biosynthesis and metabolism	Glycosaminoglycan degradation	4	15	0.280865	1	ko00531	LOC105222132(SGSH);LOC105224017(Arsb);LOC105225659(GLB1);LOC105228814(HGSNAT)	K01565+K01135+K12309+K10532
Metabolism	Carbohydrate metabolism	Propanoate metabolism	5	20	0.287906	1	ko00640	LOC105227092(Acss3);LOC105229559(Bckdha);LOC105231281(CG12262);LOC105231405(ImpL3);LOC105232621(ACAT2)	K01908+K00166+K00249+K00016+K00626
Metabolism	Amino acid metabolism	Lysine degradation	9	40	0.28958	1	ko00310	LOC105224305(Set1);LOC105224512(Aldh1b1);LOC105224723(GA16561);LOC105228811(Bbox1);LOC105229197(AASS);LOC105229910(PR-Set7);LOC105232621(ACAT2);LOC105233203(Hmt4-20);MSTRG.9464(--)	K11422+K00128+K11703+K00471+K14157+K11428+K00626+K11429+K00471
Organismal Systems	Digestive system	Mineral absorption	6	25	0.290845	1	ko04978	LOC105221977(slc46a1);LOC105230928(ClC-a);LOC105231062(--);LOC105231156(SLC9A3);LOC105232922(SLC8A1);LOC105232923(Slc8a3)	K14613+K05011+K14686+K12040+K05849+K05849
Metabolism	Biosynthesis of other secondary metabolites	Caffeine metabolism	2	6	0.297549	1	ko00232	LOC105223311(AAO2);LOC105223314(AAO2)	K00106+K00106
Metabolism	Lipid metabolism	Linoleic acid metabolism	2	6	0.297549	1	ko00591	LOC105224532(PLA2);LOC105227365(PLA2G12B)	K01047+K01047
Metabolism	Energy metabolism	Sulfur metabolism	2	6	0.297549	1	ko00920	LOC105228313(CG7280);LOC105232682(impad1)	K00387+K15759
Human Diseases	Infectious diseases	Malaria	2	6	0.297549	1	ko05144	LOC105229164(Sdc);LOC105230907(Cd82)	K16336+K06508
Metabolism	Nucleotide metabolism	Pyrimidine metabolism	16	77	0.309979	1	ko00240	LOC105223075(Polr1c);LOC105223573(RpI135);LOC105223978(--);LOC105223979(CTPsyn);LOC105224743(Polr3h);LOC105224807(DNApol-alpha50);LOC105226045(UPP1);LOC105226526(RpI1);LOC105226786(--);LOC105227970(PNP);LOC105230669(RnrS);LOC105231050(UPP1);LOC105231525(r-l);LOC105232527(DNApol-alpha60);LOC105233253(Upp1);LOC105233593(--)	K03027+K03002+K01937+K01937+K03022+K02684+K00757+K02999+K03005+K03783+K10808+K00757+K13421+K02685+K00757+K03004
Cellular Processes	Cell growth and death	Ferroptosis	3	11	0.319025	1	ko04216	LOC105222526(nes);LOC105229822(GCLM);LOC105229852(SLC3A2)	K13515+K11205+K06519
Organismal Systems	Digestive system	Protein digestion and absorption	13	62	0.323817	1	ko04974	LOC105222522(--);LOC105223011(yin);LOC105223013(yin);LOC105223014(yin);LOC105225162(thetaTry);LOC105225165(ami);LOC105228391(TRYP4);LOC105229852(SLC3A2);LOC105230174(Col1a2);LOC105231156(SLC9A3);LOC105232922(SLC8A1);LOC105232923(Slc8a3);MSTRG.3707(--)	K08131+K14206+K14206+K14206+K01312+K01312+K01312+K06519+K19719+K12040+K05849+K05849+K14209
Metabolism	Energy metabolism	Nitrogen metabolism	4	16	0.325366	1	ko00910	LOC105222926(Gdh);LOC105224138(Gs2);LOC105224587(--);LOC105234179(Ca2)	K00261+K01915+K01672+K01672
Environmental Information Processing	Signaling molecules and interaction	ECM-receptor interaction	4	16	0.325366	1	ko04512	LOC105222522(--);LOC105227172(SSPO);LOC105230174(Col1a2);LOC105232483(Lama1)	K08131+K03900+K19719+K05637
Organismal Systems	Sensory system	Olfactory transduction	4	16	0.325366	1	ko04740	LOC105225287(Eip63F-1);LOC105232251(Ggamma30A);LOC105232922(SLC8A1);LOC105232923(Slc8a3)	K02183+K04547+K05849+K05849
Human Diseases	Cancers	Basal cell carcinoma	5	21	0.326514	1	ko05217	LOC105223918(smo);LOC105226202(Wnt5);LOC105232091(Axn);LOC105233659(GADD45A);LOC115066525(Wnt4)	K06226+K00444+K02157+K04402+K01064
Metabolism	Global and overview maps	Biosynthesis of amino acids	12	57	0.328683	1	ko01230	LOC105222766(Shmt1);LOC105224138(Gs2);LOC105224260(Aldh18a1);LOC105224361(CBSL);LOC105224406(GOT2);LOC105224618(Pfk);LOC105224810(Idh1);LOC105226796(THA2);LOC105228163(Taldo);LOC105229143(Tktl2);LOC105230177(Rpia);LOC105233770(PYCR1)	K00600+K01915+K12657+K01697+K14455+K00850+K00031+K01620+K00616+K00615+K01807+K00286
Environmental Information Processing	Signal transduction	Hippo signaling pathway -fly	12	57	0.328683	1	ko04391	LOC105223481(HMCN1);LOC105223811(dlg1);LOC105224246(dlg1);LOC105225453(Act57B);LOC105225859(wts);LOC105228222(Act79B);LOC105228649(Tret1-2);LOC105229262(ex);LOC105230692(egr);LOC105232522(dco);LOC105233721(vn);LOC115065999(dlg1)	K16680+K12076+K12076+K05692+K08791+K05692+K06069+K16683+K16678+K08960+K16690+K12076
Metabolism	Metabolism of other amino acids	D-Glutamine and D-glutamate metabolism	1	2	0.328982	1	ko00471	LOC105222926(Gdh)	K00261
Human Diseases	Cancers	Gastric cancer	9	42	0.344075	1	ko05226	LOC105223845(Abcb1a);LOC105223991(btl);LOC105225067(drk);LOC105225090(Lrp6);LOC105226202(Wnt5);LOC105226497(Mdr65);LOC105232091(Axn);LOC105233659(GADD45A);LOC115066525(Wnt4)	K05658+K05093+K04364+K03068+K00444+K05658+K02157+K04402+K01064
Organismal Systems	Development	Dorso-ventral axis formation	7	32	0.354896	1	ko04320	LOC105225067(drk);LOC105226447(rho);LOC105226448(rho);LOC105228744(aop);LOC105230567(aub);LOC105231239(Cf2);LOC105232402(grk)	K04364+K02857+K02857+K03211+K02156+K02215+K02447
Organismal Systems	Immune system	T cell receptor signaling pathway	7	32	0.354896	1	ko04660	LOC105223811(dlg1);LOC105224246(dlg1);LOC105225067(drk);LOC105226958(CanA-14F);LOC105227058(Pak3);LOC105232151(hep);LOC115065999(dlg1)	K12076+K12076+K04364+K04348+K04409+K04431+K12076
Genetic Information Processing	Folding, sorting and degradation	Protein export	5	22	0.3656	1	ko03060	LOC105223697(Spase25);LOC105228412(SEC61B);LOC105230011(Spase22-23);LOC105231873(Sec11a);LOC105232640(Spase12)	K12947+K09481+K12948+K13280+K12946
Cellular Processes	Cell growth and death	p53 signaling pathway	5	22	0.3656	1	ko04115	LOC105230669(RnrS);LOC105233659(GADD45A);LOC105233714(sina);LOC105233949(Rchy1);LOC105234044(mei-41)	K10808+K04402+K04506+K10144+K06640
Metabolism	Amino acid metabolism	Histidine metabolism	2	7	0.369987	1	ko00340	LOC105224512(Aldh1b1);LOC105232128(CG11596)	K00128+K19787
Metabolism	Glycan biosynthesis and metabolism	Glycosphingolipid biosynthesis - ganglio series	2	7	0.369987	1	ko00604	LOC105225659(GLB1);LOC105226456(Slc33a1)	K12309+K03372
Environmental Information Processing	Signal transduction	Hippo signaling pathway - multiple species	4	17	0.370251	1	ko04392	LOC105225859(wts);LOC105227058(Pak3);LOC105229262(ex);LOC105232522(dco)	K08791+K04409+K16683+K08960
Organismal Systems	Digestive system	Vitamin digestion and absorption	4	17	0.370251	1	ko04977	LOC105221977(slc46a1);LOC105225580(Cubn);LOC105226014(SLC19A2);LOC105232645(vanin-like)	K14613+K14616+K14610+K01435
Organismal Systems	Digestive system	Cholesterol metabolism	4	17	0.370251	1	ko04979	LOC105223844(Soat1);LOC105224194(Lip1);LOC105224212(Lip1);LOC105226761(--)	K00637+K01052+K01052+K13443
Human Diseases	Neurodegenerative diseases	Prion diseases	4	17	0.370251	1	ko05020	LOC105223913(STIP1);LOC105224006(Hsc70-1);LOC105229447(Sod1);LOC105231830(Hsc70-2)	K09553+K03283+K04565+K03283
Metabolism	Carbohydrate metabolism	Butanoate metabolism	3	12	0.373129	1	ko00650	LOC105224871(Gad1);LOC105230446(Acads);LOC105232621(ACAT2)	K01580+K00248+K00626
Metabolism	Amino acid metabolism	Cysteine and methionine metabolism	7	33	0.387093	1	ko00270	LOC105223108(HMT-1);LOC105224361(CBSL);LOC105224406(GOT2);LOC105225053(AHCYL2);LOC105228941(cdo1);LOC105229822(GCLM);LOC105231405(ImpL3)	K00547+K01697+K14455+K01251+K00456+K11205+K00016
Cellular Processes	Cell growth and death	Apoptosis - fly	10	49	0.391413	1	ko04214	LOC105224480(Dronc);LOC105225038(PRDX4);LOC105225270(Eip74EF);LOC105225859(wts);LOC105226312(EcR);LOC105226319(--);LOC105230692(egr);LOC105232151(hep);LOC105232870(Btf3l4);LOC105234044(mei-41)	K20009+K03386+K09428+K08791+K14034+K20010+K16678+K04431+K01527+K06640
Genetic Information Processing	Transcription	RNA polymerase	6	28	0.395544	1	ko03020	LOC105223075(Polr1c);LOC105223573(RpI135);LOC105224743(Polr3h);LOC105226526(RpI1);LOC105226786(--);LOC105233593(--)	K03027+K03002+K03022+K02999+K03005+K03004
Human Diseases	Cancers	Proteoglycans in cancer	19	98	0.407764	1	ko05205	LOC105222537(Ddx17);LOC105223918(smo);LOC105225067(drk);LOC105225453(Act57B);LOC105226057(--);LOC105226202(Wnt5);LOC105226824(Cp1);LOC105227058(Pak3);LOC105227766(Cd53);LOC105228222(Act79B);LOC105228592(flw);LOC105229164(Sdc);LOC105230245(Pp1alpha-96A);LOC105232048(csw);LOC105232835(Ctla2a);LOC105233513(Src64B);LOC105234174(Flnc);LOC109579906(--);LOC115066525(Wnt4)	K12823+K06226+K04364+K05692+K10380+K00444+K01365+K04409+K06497+K05692+K06269+K16336+K06269+K07293+K01365+K05704+K04437+K10380+K01064
Human Diseases	Cardiovascular diseases	Viral myocarditis	4	18	0.414915	1	ko05416	LOC105225453(Act57B);LOC105228222(Act79B);LOC105229794(Mhc);LOC105232483(Lama1)	K05692+K05692+K17751+K05637
Cellular Processes	Cell growth and death	Cellular senescence	13	66	0.414966	1	ko04218	LOC105225287(Eip63F-1);LOC105226528(Hus1);LOC105226958(CanA-14F);LOC105227418(CycA);LOC105228592(flw);LOC105228807(MAPk-Ak2);LOC105230245(Pp1alpha-96A);LOC105231615(pnr);LOC105231705(CycB3);LOC105233659(GADD45A);LOC105233742(foxo);LOC105234044(mei-41);LOC105234144(foxo)	K02183+K10903+K04348+K06627+K06269+K04443+K06269+K09183+K21771+K04402+K09408+K06640+K09408
Organismal Systems	Excretory system	Proximal tubule bicarbonate reclamation	3	13	0.426331	1	ko04964	LOC105222926(Gdh);LOC105231156(SLC9A3);LOC105232191(Pepck)	K00261+K12040+K01596
Organismal Systems	Immune system	C-type lectin receptor signaling pathway	6	29	0.430664	1	ko04625	LOC105225287(Eip63F-1);LOC105226958(CanA-14F);LOC105227058(Pak3);LOC105228807(MAPk-Ak2);LOC105232048(csw);LOC105233513(Src64B)	K02183+K04348+K04409+K04443+K07293+K05704
Organismal Systems	Nervous system	GABAergic synapse	8	40	0.439095	1	ko04727	LOC105221829(Gabbr1);LOC105224042(Grd);LOC105224138(Gs2);LOC105224871(Gad1);LOC105228157(SLC12A6);LOC105232029(Gnb5);LOC105232251(Ggamma30A);LOC105233513(Src64B)	K04615+K05175+K01915+K01580+K14427+K04539+K04547+K05704
Human Diseases	Cancers	Endometrial cancer	5	24	0.443583	1	ko05213	LOC105225067(drk);LOC105232091(Axn);LOC105233659(GADD45A);LOC105233742(foxo);LOC105234144(foxo)	K04364+K02157+K04402+K09408+K09408
Metabolism	Biosynthesis of other secondary metabolites	Neomycin, kanamycin and gentamicin biosynthesis	1	3	0.450386	1	ko00524	LOC105223186(Hex-t2)	K00844
Organismal Systems	Nervous system	Glutamatergic synapse	8	41	0.468796	1	ko04724	LOC105222157(HOMER2);LOC105224138(Gs2);LOC105226958(CanA-14F);LOC105232029(Gnb5);LOC105232251(Ggamma30A);LOC105233100(Grin2b);LOC109579326(Gnaq);LOC109580066(--)	K15010+K01915+K04348+K04539+K04547+K05210+K04634+K05210
Organismal Systems	Endocrine system	Adipocytokine signaling pathway	5	25	0.481767	1	ko04920	LOC105232048(csw);LOC105232191(Pepck);LOC105232303(bgm);LOC105232304(CG4500);LOC105232306(CG4500)	K07293+K01596+K15013+K15013+K15013
Organismal Systems	Sensory system	Phototransduction - fly	7	36	0.483165	1	ko04745	LOC105225234(Gbeta76C);LOC105225287(Eip63F-1);LOC105225453(Act57B);LOC105228222(Act79B);LOC105228248(Dagla);LOC105232251(Ggamma30A);LOC109579326(Gnaq)	K07972+K02183+K05692+K05692+K13806+K04547+K04634
Human Diseases	Immune diseases	Rheumatoid arthritis	6	31	0.499628	1	ko05323	LOC105226824(Cp1);LOC105227818(ATP6V0A1);LOC105231749(ATP6V0A1);LOC105231750(Atp6v0a1);LOC105232161(Vha13);LOC105232835(Ctla2a)	K01365+K02154+K02154+K02154+K02152+K01365
Metabolism	Metabolism of other amino acids	Taurine and hypotaurine metabolism	2	9	0.504081	1	ko00430	LOC105224871(Gad1);LOC105228941(cdo1)	K01580+K00456
Environmental Information Processing	Signal transduction	Hippo signaling pathway	13	70	0.506761	1	ko04390	LOC105223811(dlg1);LOC105224246(dlg1);LOC105225453(Act57B);LOC105225859(wts);LOC105226202(Wnt5);LOC105228222(Act79B);LOC105228592(flw);LOC105228649(Tret1-2);LOC105230245(Pp1alpha-96A);LOC105232091(Axn);LOC105232522(dco);LOC115065999(dlg1);LOC115066525(Wnt4)	K12076+K12076+K05692+K08791+K00444+K05692+K06269+K06069+K06269+K02157+K08960+K12076+K01064
Human Diseases	Substance dependence	Amphetamine addiction	7	37	0.514366	1	ko05031	LOC105225287(Eip63F-1);LOC105226958(CanA-14F);LOC105227310(DAT);LOC105228592(flw);LOC105230245(Pp1alpha-96A);LOC105233100(Grin2b);LOC109580066(--)	K02183+K04348+K05036+K06269+K06269+K05210+K05210
Environmental Information Processing	Signal transduction	Ras signaling pathway	14	76	0.516778	1	ko04014	LOC105223991(btl);LOC105224532(PLA2);LOC105225021(RasGAP1);LOC105225067(drk);LOC105225287(Eip63F-1);LOC105226004(Rlip);LOC105227058(Pak3);LOC105227365(PLA2G12B);LOC105229334(dl);LOC105232029(Gnb5);LOC105232048(csw);LOC105232251(Ggamma30A);LOC105233100(Grin2b);LOC109580066(--)	K05093+K01047+K12380+K04364+K02183+K08773+K04409+K01047+K09254+K04539+K07293+K04547+K05210+K05210
Organismal Systems	Endocrine system	Oxytocin signaling pathway	12	65	0.519429	1	ko04921	LOC105225287(Eip63F-1);LOC105225453(Act57B);LOC105226958(CanA-14F);LOC105228222(Act79B);LOC105228592(flw);LOC105230125(--);LOC105230245(Pp1alpha-96A);LOC105230478(Npr1);LOC105232421(Cacna2d3);LOC105233513(Src64B);LOC109579326(Gnaq);MSTRG.8496(--)	K02183+K05692+K04348+K05692+K06269+K12323+K06269+K12323+K04861+K05704+K04634+K12323
Metabolism	Amino acid metabolism	Arginine biosynthesis	3	15	0.527097	1	ko00220	LOC105222926(Gdh);LOC105224138(Gs2);LOC105224406(GOT2)	K00261+K01915+K14455
Metabolism	Carbohydrate metabolism	Glyoxylate and dicarboxylate metabolism	6	32	0.533027	1	ko00630	LOC105221826(KFase);LOC105222766(Shmt1);LOC105224026(PGP);LOC105224138(Gs2);LOC105224599(Gldc);LOC105232621(ACAT2)	K01432+K00600+K19269+K01915+K00281+K00626
Human Diseases	Endocrine and metabolic diseases	Insulin resistance	9	49	0.538104	1	ko04931	LOC105222009(GlyP);LOC105228592(flw);LOC105230245(Pp1alpha-96A);LOC105231569(Pkc98E);LOC105231918(GFPT2);LOC105232048(csw);LOC105232191(Pepck);LOC105232625(Gbs-76A);MSTRG.2113(SLC27A4)	K00688+K06269+K06269+K18050+K00820+K07293+K01596+K07189+K08745
Human Diseases	Cancers	Choline metabolism in cancer	10	55	0.548064	1	ko05231	LOC105224472(CG1311);LOC105225067(drk);LOC105225548(rdgA);LOC105226287(Orct);LOC105227846(PLPP1);LOC105227847(PLPP3);LOC105227848(PLPP1);LOC105230334(CG34384);LOC105231741(Orct2);LOC105232613(Dgkq)	K06515+K04364+K00901+K08202+K01080+K01080+K01080+K00901+K08202+K00901
Metabolism	Amino acid metabolism	Phenylalanine, tyrosine and tryptophan biosynthesis	1	4	0.549856	1	ko00400	LOC105224406(GOT2)	K14455
Human Diseases	Cancers	Pathways in cancer	33	184	0.55308	1	ko05200	LOC105222104(GstD1);LOC105222427(GstD7);LOC105223918(smo);LOC105223991(btl);LOC105224360(MGST1);LOC105224961(KLHL12);LOC105225067(drk);LOC105225090(Lrp6);LOC105225287(Eip63F-1);LOC105225812(GST1);LOC105225817(GstD1);LOC105225994(Gst4);LOC105226004(Rlip);LOC105226202(Wnt5);LOC105226434(Hsp83);LOC105226691(Alk);LOC105227418(CycA);LOC105227725(GST1);LOC105229681(GST1);LOC105229689(GST1);LOC105229690…	K00799+K00799+K06226+K05093+K00799+K10456+K04364+K03068+K02183+K00799+K00799+K00799+K08773+K00444+K04079+K05119+K06627+K00799+K00799+K00799+K00799+K04496+K04539+K02157+K10456+K04547+K05637+K04402+K00799+K04634+K00799+K01064+K00799
Metabolism	Metabolism of cofactors and vitamins	Porphyrin and chlorophyll metabolism	8	44	0.555229	1	ko00860	LOC105228374(Updo);LOC105230262(UGT8);LOC105230268(Ugt1a1);LOC105230325(ugt3);LOC105230805(UGT2B13);LOC105231237(UGT2B15);LOC109579515(--);LOC109579516(--)	K01599+K00699+K00699+K00699+K00699+K00699+K00699+K00699
Metabolism	Global and overview maps	Carbon metabolism	17	95	0.562204	1	ko01200	LOC105222766(Shmt1);LOC105222926(Gdh);LOC105223186(Hex-t2);LOC105224026(PGP);LOC105224406(GOT2);LOC105224599(Gldc);LOC105224618(Pfk);LOC105224810(Idh1);LOC105228097(Pgi);LOC105228163(Taldo);LOC105228673(SdhA);LOC105228674(CG17333);LOC105229143(Tktl2);LOC105230177(Rpia);LOC105230446(Acads);LOC105231281(CG12262);LOC105232621(ACAT2)	K00600+K00261+K00844+K19269+K14455+K00281+K00850+K00031+K01810+K00616+K00234+K01057+K00615+K01807+K00248+K00249+K00626
Metabolism	Metabolism of cofactors and vitamins	Ubiquinone and other terpenoid-quinone biosynthesis	2	10	0.563849	1	ko00130	LOC105230774(Coq6);LOC105231061(Coq2)	K06126+K06125
Metabolism	Amino acid metabolism	Valine, leucine and isoleucine degradation	6	33	0.565457	1	ko00280	LOC105224512(Aldh1b1);LOC105227875(ACADSB);LOC105229559(Bckdha);LOC105230446(Acads);LOC105231281(CG12262);LOC105232621(ACAT2)	K00128+K09478+K00166+K00248+K00249+K00626
Human Diseases	Drug resistance	EGFR tyrosine kinase inhibitor resistance	6	33	0.565457	1	ko01521	LOC105223991(btl);LOC105225067(drk);LOC105231914(Eif4e2);LOC105233513(Src64B);LOC105233742(foxo);LOC105234144(foxo)	K05093+K04364+K03259+K05704+K09408+K09408
Cellular Processes	Cellular community - eukaryotes	Tight junction	11	62	0.580635	1	ko04530	LOC105223811(dlg1);LOC105224246(dlg1);LOC105225453(Act57B);LOC105225618(Actn);LOC105228222(Act79B);LOC105228649(Tret1-2);LOC105231569(Pkc98E);LOC105231615(pnr);LOC105232151(hep);LOC105233513(Src64B);LOC115065999(dlg1)	K12076+K12076+K05692+K05699+K05692+K06069+K18050+K09183+K04431+K05704+K12076
Organismal Systems	Immune system	Platelet activation	8	45	0.582733	1	ko04611	LOC105225453(Act57B);LOC105227172(SSPO);LOC105228222(Act79B);LOC105228592(flw);LOC105228649(Tret1-2);LOC105230245(Pp1alpha-96A);LOC105233513(Src64B);LOC109579326(Gnaq)	K05692+K03900+K05692+K06269+K06069+K06269+K05704+K04634
Environmental Information Processing	Signaling molecules and interaction	Neuroactive ligand-receptor interaction	12	68	0.587829	1	ko04080	LOC105221829(Gabbr1);LOC105222155(GNRHR);LOC105224042(Grd);LOC105225162(thetaTry);LOC105225165(ami);LOC105226623(TSHR);LOC105228391(TRYP4);LOC105229170(crhr1);LOC105230554(5-HT1B);LOC105230555(5-HT1A);LOC105233100(Grin2b);LOC109580066(--)	K04615+K04280+K05175+K01312+K01312+K04249+K01312+K04578+K04153+K04153+K05210+K05210
Human Diseases	Cancers	Transcriptional misregulation in cancers	9	51	0.590209	1	ko05202	LOC105221788(--);LOC105222537(Ddx17);LOC105224398(prd);LOC105227418(CycA);LOC105228744(aop);LOC105229334(dl);LOC105229591(Mllt3);LOC105233575(Kdm6a);LOC105233659(GADD45A)	K06571+K12823+K09381+K06627+K03211+K09254+K15187+K11447+K04402
Cellular Processes	Cellular community - eukaryotes	Focal adhesion	13	74	0.594567	1	ko04510	LOC105222522(--);LOC105225067(drk);LOC105225453(Act57B);LOC105225618(Actn);LOC105227058(Pak3);LOC105227172(SSPO);LOC105228222(Act79B);LOC105228592(flw);LOC105230174(Col1a2);LOC105230245(Pp1alpha-96A);LOC105232483(Lama1);LOC105233513(Src64B);LOC105234174(Flnc)	K08131+K04364+K05692+K05699+K04409+K03900+K05692+K06269+K19719+K06269+K05637+K05704+K04437
Organismal Systems	Endocrine system	Insulin signaling pathway	11	63	0.603595	1	ko04910	LOC105222009(GlyP);LOC105223186(Hex-t2);LOC105225067(drk);LOC105225287(Eip63F-1);LOC105226742(Fasn);LOC105228592(flw);LOC105228649(Tret1-2);LOC105230245(Pp1alpha-96A);LOC105231914(Eif4e2);LOC105232191(Pepck);LOC105232625(Gbs-76A)	K00688+K00844+K04364+K02183+K00665+K06269+K06069+K06269+K03259+K01596+K07189
Metabolism	Metabolism of other amino acids	beta-Alanine metabolism	3	17	0.617236	1	ko00410	LOC105224512(Aldh1b1);LOC105224871(Gad1);LOC105231281(CG12262)	K00128+K01580+K00249
Organismal Systems	Endocrine system	Regulation of lipolysis in adipocyte	4	23	0.619464	1	ko04923	LOC105226623(TSHR);LOC105230125(--);LOC105230478(Npr1);MSTRG.8496(--)	K04249+K12323+K12323+K12323
Organismal Systems	Excretory system	Collecting duct acid secretion	4	23	0.619464	1	ko04966	LOC105227818(ATP6V0A1);LOC105231749(ATP6V0A1);LOC105231750(Atp6v0a1);LOC105232161(Vha13)	K02154+K02154+K02154+K02152
Organismal Systems	Endocrine system	Prolactin signaling pathway	5	29	0.622899	1	ko04917	LOC105225067(drk);LOC105233158(SOCS6);LOC105233513(Src64B);LOC105233742(foxo);LOC105234144(foxo)	K04364+K04699+K05704+K09408+K09408
Human Diseases	Cancers	Non-small cell lung cancer	5	29	0.622899	1	ko05223	LOC105225067(drk);LOC105226691(Alk);LOC105233659(GADD45A);LOC105233742(foxo);LOC105234144(foxo)	K04364+K05119+K04402+K09408+K09408
Genetic Information Processing	Replication and repair	DNA replication	6	35	0.626837	1	ko03030	LOC105223304(Mcm6);LOC105223503(--);LOC105224807(DNApol-alpha50);LOC105226613(Mcm2);LOC105229089(Mcm7);LOC105232527(DNApol-alpha60)	K02542+K10740+K02684+K02540+K02210+K02685
Genetic Information Processing	Folding, sorting and degradation	Protein processing in endoplasmic reticulum	19	110	0.628428	1	ko04141	LOC105223120(DNAJA2);LOC105224006(Hsc70-1);LOC105224409(Der-1);LOC105224693(wbl);LOC105224891(LMAN1);LOC105225131(Prkcsh);LOC105225892(DERL2);LOC105226434(Hsp83);LOC105227760(SEC24B);LOC105228412(SEC61B);LOC105228544(TRAM1);LOC105228716(CaBP1);LOC105228793(Ganab);LOC105229475(Pdi);LOC105231207(erlec1);LOC105231830(Hsc70-2);LOC105232151(hep);LOC105233982(Rad23b);LOC109579495(l(2)k12914)	K09503+K03283+K11519+K09586+K10080+K08288+K13989+K04079+K14007+K09481+K14010+K09584+K05546+K09580+K14008+K03283+K04431+K10839+K12668
Organismal Systems	Endocrine system	Estrogen signaling pathway	9	53	0.639393	1	ko04915	LOC105221829(Gabbr1);LOC105222268(FKBP59);LOC105224006(Hsc70-1);LOC105225067(drk);LOC105225287(Eip63F-1);LOC105226434(Hsp83);LOC105231830(Hsc70-2);LOC105233513(Src64B);LOC109579326(Gnaq)	K04615+K09571+K03283+K04364+K02183+K04079+K03283+K05704+K04634
Human Diseases	Infectious diseases	Vibrio cholerae infection	9	53	0.639393	1	ko05110	LOC105225453(Act57B);LOC105225976(Slc12a2);LOC105227818(ATP6V0A1);LOC105228222(Act79B);LOC105228412(SEC61B);LOC105231749(ATP6V0A1);LOC105231750(Atp6v0a1);LOC105232161(Vha13);LOC105234205(KdelR)	K05692+K10951+K02154+K05692+K09481+K02154+K02154+K02152+K10949
Organismal Systems	Circulatory system	Vascular smooth muscle contraction	10	59	0.643552	1	ko04270	LOC105224532(PLA2);LOC105225287(Eip63F-1);LOC105227365(PLA2G12B);LOC105228592(flw);LOC105230125(--);LOC105230245(Pp1alpha-96A);LOC105230478(Npr1);LOC105231569(Pkc98E);LOC109579326(Gnaq);MSTRG.8496(--)	K01047+K02183+K01047+K06269+K12323+K06269+K12323+K18050+K04634+K12323
Organismal Systems	Nervous system	Dopaminergic synapse	10	59	0.643552	1	ko04728	LOC105225287(Eip63F-1);LOC105226958(CanA-14F);LOC105227310(DAT);LOC105228592(flw);LOC105230245(Pp1alpha-96A);LOC105232029(Gnb5);LOC105232251(Ggamma30A);LOC105233100(Grin2b);LOC109579326(Gnaq);LOC109580066(--)	K02183+K04348+K05036+K06269+K06269+K04539+K04547+K05210+K04634+K05210
Organismal Systems	Nervous system	Long-term potentiation	7	42	0.657549	1	ko04720	LOC105225287(Eip63F-1);LOC105226958(CanA-14F);LOC105228592(flw);LOC105230245(Pp1alpha-96A);LOC105233100(Grin2b);LOC109579326(Gnaq);LOC109580066(--)	K02183+K04348+K06269+K06269+K05210+K04634+K05210
Environmental Information Processing	Signal transduction	Hedgehog signaling pathway	3	18	0.6577	1	ko04340	LOC105223918(smo);LOC105230932(rdx);LOC105232522(dco)	K06226+K10523+K08960
Organismal Systems	Environmental adaptation	Circadian entrainment	7	43	0.682934	1	ko04713	LOC105225287(Eip63F-1);LOC105230055(CG42673);LOC105232029(Gnb5);LOC105232251(Ggamma30A);LOC105233100(Grin2b);LOC109579326(Gnaq);LOC109580066(--)	K02183+K16513+K04539+K04547+K05210+K04634+K05210
Metabolism	Carbohydrate metabolism	Fructose and mannose metabolism	4	25	0.687568	1	ko00051	LOC105223186(Hex-t2);LOC105224618(Pfk);LOC105225298(CG10688);LOC105225946(Khk)	K00844+K00850+K17497+K00846
Environmental Information Processing	Signal transduction	Hedgehog signaling pathway - fly	4	25	0.687568	1	ko04341	LOC105223918(smo);LOC105227616(hh);LOC105230932(rdx);LOC105232522(dco)	K06226+K06224+K10523+K08960
Environmental Information Processing	Signal transduction	Jak-STAT signaling pathway	3	19	0.694987	1	ko04630	LOC105225067(drk);LOC105232048(csw);LOC105233158(SOCS6)	K04364+K07293+K04699
Metabolism	Lipid metabolism	Synthesis and degradation of ketone bodies	1	6	0.698109	1	ko00072	LOC105232621(ACAT2)	K00626
Metabolism	Amino acid metabolism	Phenylalanine metabolism	1	6	0.698109	1	ko00360	LOC105224406(GOT2)	K14455
Metabolism	Glycan biosynthesis and metabolism	Glycosphingolipid biosynthesis - globo and isoglobo series	1	6	0.698109	1	ko00603	LOC105227741(NAGA)	K01189
Metabolism	Metabolism of cofactors and vitamins	Vitamin B6 metabolism	1	6	0.698109	1	ko00750	LOC105230296(PNPO)	K00275
Genetic Information Processing	Folding, sorting and degradation	Sulfur relay system	1	6	0.698109	1	ko04122	LOC105230667(GI19452)	K14168
Organismal Systems	Environmental adaptation	Circadian rhythm - fly	1	6	0.698109	1	ko04711	LOC105232522(dco)	K08960
Organismal Systems	Endocrine system	Aldosterone synthesis and secretion	7	44	0.707094	1	ko04925	LOC105225287(Eip63F-1);LOC105228248(Dagla);LOC105230125(--);LOC105230478(Npr1);LOC105231569(Pkc98E);LOC109579326(Gnaq);MSTRG.8496(--)	K02183+K13806+K12323+K12323+K18050+K04634+K12323
Environmental Information Processing	Signal transduction	FoxO signaling pathway	10	62	0.707351	1	ko04068	LOC105222157(HOMER2);LOC105225067(drk);LOC105227188(--);LOC105229463(SAK);LOC105231705(CycB3);LOC105232191(Pepck);LOC105232522(dco);LOC105233659(GADD45A);LOC105233742(foxo);LOC105234144(foxo)	K15010+K04364+K15464+K08863+K21771+K01596+K08960+K04402+K09408+K09408
Metabolism	Metabolism of cofactors and vitamins	Nicotinate and nicotinamide metabolism	2	13	0.711089	1	ko00760	LOC105227970(PNP);LOC105234162(Nmnat1)	K03783+K06210
Metabolism	Carbohydrate metabolism	Galactose metabolism	5	32	0.712139	1	ko00052	LOC105223186(Hex-t2);LOC105224618(Pfk);LOC105225659(GLB1);LOC105227741(NAGA);LOC105228045(Mal-A3)	K00844+K00850+K12309+K01189+K01187
Metabolism	Carbohydrate metabolism	Glycolysis / Gluconeogenesis	8	51	0.72814	1	ko00010	LOC105223186(Hex-t2);LOC105224512(Aldh1b1);LOC105224588(AKR1A1);LOC105224618(Pfk);LOC105228097(Pgi);LOC105231405(ImpL3);LOC105232191(Pepck);LOC105232983(Adh)	K00844+K00128+K00002+K00850+K01810+K00016+K01596+K00001
Human Diseases	Drug resistance	Antifolate resistance	3	20	0.729121	1	ko01523	LOC105221977(slc46a1);LOC105222766(Shmt1);LOC105231580(l(2)03659)	K14613+K00600+K05673
Human Diseases	Substance dependence	Cocaine addiction	3	20	0.729121	1	ko05030	LOC105227310(DAT);LOC105233100(Grin2b);LOC109580066(--)	K05036+K05210+K05210
Genetic Information Processing	Replication and repair	Fanconi anemia pathway	4	27	0.746587	1	ko03460	LOC105223503(--);LOC105223535(mei-9);LOC105225284(UBC37);LOC105234044(mei-41)	K10740+K10848+K13960+K06640
Human Diseases	Cancers	Chronic myeloid leukemia	4	27	0.746587	1	ko05220	LOC105225067(drk);LOC105231906(CtBP);LOC105232048(csw);LOC105233659(GADD45A)	K04364+K04496+K07293+K04402
Organismal Systems	Circulatory system	Adrenergic signaling in cardiomyocytes	9	58	0.746761	1	ko04261	LOC105225287(Eip63F-1);LOC105226582(Tm1);LOC105228592(flw);LOC105229794(Mhc);LOC105230245(Pp1alpha-96A);LOC105232421(Cacna2d3);LOC105232922(SLC8A1);LOC105232923(Slc8a3);LOC109579326(Gnaq)	K02183+K10373+K06269+K17751+K06269+K04861+K05849+K05849+K04634
Organismal Systems	Nervous system	Neurotrophin signaling pathway	7	46	0.751647	1	ko04722	LOC105225067(drk);LOC105225287(Eip63F-1);LOC105228807(MAPk-Ak2);LOC105232048(csw);LOC105232151(hep);LOC105233742(foxo);LOC105234144(foxo)	K04364+K02183+K04443+K07293+K04431+K09408+K09408
Metabolism	Glycan biosynthesis and metabolism	Glycosaminoglycan biosynthesis - chondroitin sulfate / dermatan sulfate	1	7	0.752796	1	ko00532	LOC105226957(Chpf)	K00747
Metabolism	Metabolism of cofactors and vitamins	Riboflavin metabolism	1	7	0.752796	1	ko00740	LOC105226349(stp1)	K14394
Human Diseases	Cancers	Breast cancer	6	40	0.756108	1	ko05224	LOC105225067(drk);LOC105225090(Lrp6);LOC105226202(Wnt5);LOC105232091(Axn);LOC105233659(GADD45A);LOC115066525(Wnt4)	K04364+K03068+K00444+K02157+K04402+K01064
Organismal Systems	Immune system	B cell receptor signaling pathway	3	21	0.760182	1	ko04662	LOC105225067(drk);LOC105226958(CanA-14F);LOC105230907(Cd82)	K04364+K04348+K06508
Human Diseases	Cancers	Central carbon metabolism in cancer	5	34	0.762741	1	ko05230	LOC105223186(Hex-t2);LOC105223991(btl);LOC105224618(Pfk);LOC105224810(Idh1);LOC105231405(ImpL3)	K00844+K05093+K00850+K00031+K00016
Cellular Processes	Transport and catabolism	Mitophagy - animal	4	28	0.772725	1	ko04137	LOC105227188(--);LOC105233513(Src64B);LOC105233742(foxo);LOC105234144(foxo)	K15464+K05704+K09408+K09408
Organismal Systems	Immune system	Chemokine signaling pathway	7	48	0.791154	1	ko04062	LOC105225067(drk);LOC105227058(Pak3);LOC105232029(Gnb5);LOC105232251(Ggamma30A);LOC105233513(Src64B);LOC105233742(foxo);LOC105234144(foxo)	K04364+K04409+K04539+K04547+K05704+K09408+K09408
Organismal Systems	Immune system	Natural killer cell mediated cytotoxicity	4	29	0.796697	1	ko04650	LOC105225067(drk);LOC105226958(CanA-14F);LOC105227058(Pak3);LOC105232048(csw)	K04364+K04348+K04409+K07293
Environmental Information Processing	Signaling molecules and interaction	Cell adhesion molecules (CAMs)	1	8	0.79759	1	ko04514	LOC105229164(Sdc)	K16336
Human Diseases	Endocrine and metabolic diseases	Type I diabetes mellitus	1	8	0.79759	1	ko04940	LOC105224871(Gad1)	K01580
Organismal Systems	Circulatory system	Cardiac muscle contraction	5	36	0.80633	1	ko04260	LOC105226582(Tm1);LOC105229794(Mhc);LOC105232421(Cacna2d3);LOC105232922(SLC8A1);LOC105232923(Slc8a3)	K10373+K17751+K04861+K05849+K05849
Environmental Information Processing	Signal transduction	Wnt signaling pathway	11	74	0.808749	1	ko04310	LOC105224601(pont);LOC105224647(esn);LOC105225090(Lrp6);LOC105226202(Wnt5);LOC105226958(CanA-14F);LOC105228851(shf);LOC105231906(CtBP);LOC105232091(Axn);LOC105232522(dco);LOC105233714(sina);LOC115066525(Wnt4)	K04499+K04511+K03068+K00444+K04348+K01691+K04496+K02157+K08960+K04506+K01064
Environmental Information Processing	Signal transduction	Apelin signaling pathway	7	49	0.80905	1	ko04371	LOC105225287(Eip63F-1);LOC105231569(Pkc98E);LOC105232029(Gnb5);LOC105232251(Ggamma30A);LOC105232922(SLC8A1);LOC105232923(Slc8a3);LOC109579326(Gnaq)	K02183+K18050+K04539+K04547+K05849+K05849+K04634
Human Diseases	Infectious diseases	Epithelial cell signaling in Helicobacter pylori infection	7	49	0.80905	1	ko05120	LOC105227058(Pak3);LOC105227818(ATP6V0A1);LOC105231749(ATP6V0A1);LOC105231750(Atp6v0a1);LOC105232048(csw);LOC105232161(Vha13);LOC105233513(Src64B)	K04409+K02154+K02154+K02154+K07293+K02152+K05704
Metabolism	Global and overview maps	2-Oxocarboxylic acid metabolism	2	16	0.814335	1	ko01210	LOC105224406(GOT2);LOC105224810(Idh1)	K14455+K00031
Organismal Systems	Nervous system	Serotonergic synapse	6	43	0.816148	1	ko04726	LOC105223854(SerT);LOC105230554(5-HT1B);LOC105230555(5-HT1A);LOC105232029(Gnb5);LOC105232251(Ggamma30A);LOC109579326(Gnaq)	K05037+K04153+K04153+K04539+K04547+K04634
Environmental Information Processing	Signal transduction	MAPK signaling pathway	14	93	0.816441	1	ko04010	LOC105223991(btl);LOC105224006(Hsc70-1);LOC105224286(Map3k12);LOC105225067(drk);LOC105226958(CanA-14F);LOC105227058(Pak3);LOC105228807(MAPk-Ak2);LOC105229860(PPP5C);LOC105231830(Hsc70-2);LOC105232151(hep);LOC105232421(Cacna2d3);LOC105233659(GADD45A);LOC105233740(--);LOC105234174(Flnc)	K05093+K03283+K04422+K04364+K04348+K04409+K04443+K04460+K03283+K04431+K04861+K04402+K04380+K04437
Environmental Information Processing	Signal transduction	MAPK signaling pathway - fly	13	87	0.818047	1	ko04013	LOC105225021(RasGAP1);LOC105225067(drk);LOC105228744(aop);LOC105230340(sev);LOC105230692(egr);LOC105232048(csw);LOC105232151(hep);LOC105232402(grk);LOC105233513(Src64B);LOC105233688(sty);LOC105233714(sina);LOC105233721(vn);LOC115066508(--)	K12380+K04364+K03211+K05088+K16678+K07293+K04431+K02447+K05704+K17383+K04506+K16690+K20227
Human Diseases	Infectious diseases	Kaposi sarcoma-associated herpesvirus infection	7	50	0.825744	1	ko05167	LOC105225287(Eip63F-1);LOC105226958(CanA-14F);LOC105228807(MAPk-Ak2);LOC105232029(Gnb5);LOC105232151(hep);LOC105232251(Ggamma30A);LOC105233513(Src64B)	K02183+K04348+K04443+K04539+K04431+K04547+K05704
Environmental Information Processing	Signal transduction	PI3K-Akt signaling pathway	14	94	0.82867	1	ko04151	LOC105222522(--);LOC105223991(btl);LOC105224983(Myb);LOC105225067(drk);LOC105226434(Hsp83);LOC105227172(SSPO);LOC105230174(Col1a2);LOC105231914(Eif4e2);LOC105232029(Gnb5);LOC105232191(Pepck);LOC105232251(Ggamma30A);LOC105232483(Lama1);LOC105233742(foxo);LOC105234144(foxo)	K08131+K05093+K09420+K04364+K04079+K03900+K19719+K03259+K04539+K01596+K04547+K05637+K09408+K09408
Genetic Information Processing	Translation	mRNA surveillance pathway	9	63	0.829921	1	ko03015	LOC105222093(Rb97D);LOC105227110(Pym);LOC105227291(Pabp2);LOC105228592(flw);LOC105230245(Pp1alpha-96A);LOC105232267(SMG5);LOC105232787(Rb97D);LOC105233134(--);LOC105233362(Hrb27C)	K14411+K14294+K14396+K06269+K06269+K11125+K14411+K13114+K14411
Organismal Systems	Sensory system	Inflammatory mediator regulation of TRP channels	6	44	0.833367	1	ko04750	LOC105225287(Eip63F-1);LOC105228592(flw);LOC105230245(Pp1alpha-96A);LOC105231569(Pkc98E);LOC105233513(Src64B);LOC109579326(Gnaq)	K02183+K06269+K06269+K18050+K05704+K04634
Environmental Information Processing	Signaling molecules and interaction	Cytokine-cytokine receptor interaction	1	9	0.834279	1	ko04060	LOC105225728(Actbeta)	K22687
Organismal Systems	Immune system	Hematopoietic cell lineage	1	9	0.834279	1	ko04640	LOC105230937(Anpep)	K11140
Human Diseases	Cancers	Bladder cancer	1	9	0.834279	1	ko05219	LOC105233513(Src64B)	K05704
Environmental Information Processing	Signal transduction	AMPK signaling pathway	8	57	0.834954	1	ko04152	LOC105224618(Pfk);LOC105226742(Fasn);LOC105227418(CycA);LOC105231787(D11DS);LOC105232191(Pepck);LOC105233729(Scd1);LOC105233742(foxo);LOC105234144(foxo)	K00850+K00665+K06627+K00507+K01596+K00507+K09408+K09408
Genetic Information Processing	Replication and repair	Homologous recombination	3	24	0.836333	1	ko03440	LOC105223503(--);LOC105229007(--);LOC105233787(XRCC3)	K10740+K10871+K10880
Human Diseases	Substance dependence	Morphine addiction	5	38	0.843318	1	ko05032	LOC105221829(Gabbr1);LOC105224042(Grd);LOC105230829(Pde11);LOC105232029(Gnb5);LOC105232251(Ggamma30A)	K04615+K05175+K13298+K04539+K04547
Human Diseases	Infectious diseases	Pathogenic Escherichia coli infection	5	38	0.843318	1	ko05130	LOC105225453(Act57B);LOC105226868(betaTub56D);LOC105227022(mod);LOC105228222(Act79B);LOC105232633(--)	K05692+K07375+K11294+K05692+K11294
Cellular Processes	Cell motility	Regulation of actin cytoskeleton	9	64	0.843715	1	ko04810	LOC105223991(btl);LOC105225453(Act57B);LOC105225618(Actn);LOC105227058(Pak3);LOC105228222(Act79B);LOC105228592(flw);LOC105229886(Gel);LOC105230245(Pp1alpha-96A);LOC105233513(Src64B)	K05093+K05692+K05699+K04409+K05692+K06269+K05768+K06269+K05704
Human Diseases	Infectious diseases	Human papillomavirus infection	20	133	0.853004	1	ko05165	LOC105222522(--);LOC105223811(dlg1);LOC105224246(dlg1);LOC105225067(drk);LOC105225766(HDAC11);LOC105226202(Wnt5);LOC105227172(SSPO);LOC105227418(CycA);LOC105227818(ATP6V0A1);LOC105228649(Tret1-2);LOC105229760(HDAC6);LOC105230174(Col1a2);LOC105231749(ATP6V0A1);LOC105231750(Atp6v0a1);LOC105232091(Axn);LOC105232161(Vha13);LOC105232483(Lama1);LOC105234044(mei-41);LOC115065999(dlg1);LOC115066525(Wnt4)	K08131+K12076+K12076+K04364+K11418+K00444+K03900+K06627+K02154+K06069+K11407+K19719+K02154+K02154+K02157+K02152+K05637+K06640+K12076+K01064
Human Diseases	Infectious diseases	Bacterial invasion of epithelial cells	4	32	0.85656	1	ko05100	LOC105225453(Act57B);LOC105228222(Act79B);LOC105230219(--);LOC105233513(Src64B)	K05692+K05692+K13728+K05704
Organismal Systems	Aging	Longevity regulating pathway - multiple species	6	46	0.863912	1	ko04213	LOC105224006(Hsc70-1);LOC105229288(EIF4EBP1);LOC105229447(Sod1);LOC105231830(Hsc70-2);LOC105233742(foxo);LOC105234144(foxo)	K03283+K18644+K04565+K03283+K09408+K09408
Cellular Processes	Cellular community - eukaryotes	Signaling pathways regulating pluripotency of stem cells	6	46	0.863912	1	ko04550	LOC105223991(btl);LOC105225067(drk);LOC105225728(Actbeta);LOC105226202(Wnt5);LOC105232091(Axn);LOC115066525(Wnt4)	K05093+K04364+K22687+K00444+K02157+K01064
Metabolism	Metabolism of cofactors and vitamins	One carbon pool by folate	1	10	0.864327	1	ko00670	LOC105222766(Shmt1)	K00600
Metabolism	Carbohydrate metabolism	Starch and sucrose metabolism	4	33	0.872867	1	ko00500	LOC105222009(GlyP);LOC105223186(Hex-t2);LOC105228045(Mal-A3);LOC105228097(Pgi)	K00688+K00844+K01187+K01810
Metabolism	Carbohydrate metabolism	Pyruvate metabolism	5	40	0.874286	1	ko00620	LOC105224512(Aldh1b1);LOC105231405(ImpL3);LOC105231564(Acyp);LOC105232191(Pepck);LOC105232621(ACAT2)	K00128+K00016+K01512+K01596+K00626
Genetic Information Processing	Replication and repair	Nucleotide excision repair	5	40	0.874286	1	ko03420	LOC105223503(--);LOC105223535(mei-9);LOC105226657(ercc5);LOC105229988(CUL4B);LOC105233982(Rad23b)	K10740+K10848+K10846+K10609+K10839
Organismal Systems	Endocrine system	GnRH signaling pathway	6	47	0.877358	1	ko04912	LOC105222155(GNRHR);LOC105225067(drk);LOC105225287(Eip63F-1);LOC105232151(hep);LOC105233513(Src64B);LOC109579326(Gnaq)	K04280+K04364+K02183+K04431+K05704+K04634
Organismal Systems	Endocrine system	Glucagon signaling pathway	7	54	0.881301	1	ko04922	LOC105222009(GlyP);LOC105224618(Pfk);LOC105225287(Eip63F-1);LOC105226958(CanA-14F);LOC105231405(ImpL3);LOC105232191(Pepck);LOC109579326(Gnaq)	K00688+K00850+K02183+K04348+K00016+K01596+K04634
Human Diseases	Endocrine and metabolic diseases	Type II diabetes mellitus	2	19	0.883301	1	ko04930	LOC105223186(Hex-t2);LOC105231569(Pkc98E)	K00844+K18050
Human Diseases	Cancers	Acute myeloid leukemia	2	19	0.883301	1	ko05221	LOC105225067(drk);LOC105227418(CycA)	K04364+K06627
Cellular Processes	Transport and catabolism	Phagosome	10	74	0.885292	1	ko04145	LOC105225453(Act57B);LOC105226824(Cp1);LOC105226868(betaTub56D);LOC105227818(ATP6V0A1);LOC105228222(Act79B);LOC105228412(SEC61B);LOC105231749(ATP6V0A1);LOC105231750(Atp6v0a1);LOC105232161(Vha13);LOC105232835(Ctla2a)	K05692+K01365+K07375+K02154+K05692+K09481+K02154+K02154+K02152+K01365
Human Diseases	Cancers	Viral carcinogenesis	12	87	0.886863	1	ko05203	LOC105223811(dlg1);LOC105224246(dlg1);LOC105225067(drk);LOC105225618(Actn);LOC105225766(HDAC11);LOC105227418(CycA);LOC105228807(MAPk-Ak2);LOC105229334(dl);LOC105229760(HDAC6);LOC105229886(Gel);LOC105233513(Src64B);LOC115065999(dlg1)	K12076+K12076+K04364+K05699+K11418+K06627+K04443+K09254+K11407+K05768+K05704+K12076
Human Diseases	Infectious diseases	Toxoplasmosis	4	34	0.887551	1	ko05145	LOC105224006(Hsc70-1);LOC105229770(Cyp1);LOC105231830(Hsc70-2);LOC105232483(Lama1)	K03283+K09565+K03283+K05637
Cellular Processes	Cellular community - eukaryotes	Adherens junction	5	41	0.887721	1	ko04520	LOC105225453(Act57B);LOC105225618(Actn);LOC105226349(stp1);LOC105228222(Act79B);LOC105233513(Src64B)	K05692+K05699+K14394+K05692+K05704
Human Diseases	Infectious diseases	Chagas disease (American trypanosomiasis)	5	41	0.887721	1	ko05142	LOC105229185(--);LOC105232276(Acer);LOC105232277(Ance);LOC105232878(ACE);LOC109579326(Gnaq)	K01283+K01283+K01283+K01283+K04634
Environmental Information Processing	Signal transduction	Rap1 signaling pathway	9	68	0.89028	1	ko04015	LOC105223991(btl);LOC105225287(Eip63F-1);LOC105225453(Act57B);LOC105228222(Act79B);LOC105228649(Tret1-2);LOC105233100(Grin2b);LOC105233513(Src64B);LOC109579326(Gnaq);LOC109580066(--)	K05093+K02183+K05692+K05692+K06069+K05210+K05704+K04634+K05210
Organismal Systems	Development	Osteoclast differentiation	3	27	0.890683	1	ko04380	LOC105225067(drk);LOC105226958(CanA-14F);LOC105232151(hep)	K04364+K04348+K04431
Organismal Systems	Excretory system	Endocrine and other factor-regulated calcium reabsorption	4	35	0.900733	1	ko04961	LOC105224296(Trpv5);LOC105232922(SLC8A1);LOC105232923(Slc8a3);LOC109579326(Gnaq)	K04974+K05849+K05849+K04634
Human Diseases	Infectious diseases	Shigellosis	4	35	0.900733	1	ko05131	LOC105225453(Act57B);LOC105228222(Act79B);LOC105230219(--);LOC105233513(Src64B)	K05692+K05692+K13728+K05704
Organismal Systems	Immune system	Fc gamma R-mediated phagocytosis	6	49	0.900923	1	ko04666	LOC105227058(Pak3);LOC105227846(PLPP1);LOC105227847(PLPP3);LOC105227848(PLPP1);LOC105229886(Gel);LOC105231569(Pkc98E)	K04409+K01080+K01080+K01080+K05768+K18050
Organismal Systems	Nervous system	Synaptic vesicle cycle	6	49	0.900923	1	ko04721	LOC105224411(--);LOC105227818(ATP6V0A1);LOC105231749(ATP6V0A1);LOC105231750(Atp6v0a1);LOC105232068(Rop);LOC105232161(Vha13)	K15293+K02154+K02154+K02154+K15292+K02152
Environmental Information Processing	Signal transduction	Phosphatidylinositol signaling system	7	56	0.903022	1	ko04070	LOC105222459(CdsA);LOC105225287(Eip63F-1);LOC105225548(rdgA);LOC105229147(Mtmr14);LOC105230334(CG34384);LOC105232613(Dgkq);LOC105232682(impad1)	K00981+K02183+K00901+K18086+K00901+K00901+K15759
Environmental Information Processing	Signal transduction	Phospholipase D signaling pathway	8	63	0.905762	1	ko04072	LOC105225067(drk);LOC105225548(rdgA);LOC105227846(PLPP1);LOC105227847(PLPP3);LOC105227848(PLPP1);LOC105230334(CG34384);LOC105232048(csw);LOC105232613(Dgkq)	K04364+K00901+K01080+K01080+K01080+K00901+K07293+K00901
Human Diseases	Cancers	Thyroid cancer	1	12	0.909084	1	ko05216	LOC105233659(GADD45A)	K04402
Organismal Systems	Immune system	Leukocyte transendothelial migration	4	36	0.912533	1	ko04670	LOC105225453(Act57B);LOC105225618(Actn);LOC105228222(Act79B);LOC105232048(csw)	K05692+K05699+K05692+K07293
Human Diseases	Cancers	MicroRNAs in cancer	8	64	0.914626	1	ko05206	LOC105223845(Abcb1a);LOC105224907(sn);LOC105225067(drk);LOC105225224(--);LOC105226497(Mdr65);LOC105226582(Tm1);LOC105231569(Pkc98E);LOC105233688(sty)	K05658+K17455+K04364+K09409+K05658+K10373+K18050+K17383
Environmental Information Processing	Signal transduction	Notch signaling pathway	2	21	0.915196	1	ko04330	LOC105231906(CtBP);LOC105233250(H)	K04496+K06064
Organismal Systems	Immune system	Cytosolic DNA-sensing pathway	2	21	0.915196	1	ko04623	LOC105223075(Polr1c);LOC105224743(Polr3h)	K03027+K03022
Organismal Systems	Endocrine system	Thyroid hormone synthesis	4	37	0.923069	1	ko04918	LOC105225028(GPXMC1);LOC105226623(TSHR);LOC105226635(lds);LOC109579326(Gnaq)	K00432+K04249+K15173+K04634
Metabolism	Glycan biosynthesis and metabolism	Glycosaminoglycan biosynthesis - heparan sulfate / heparin	1	13	0.925584	1	ko00534	LOC105228120(ttv)	K02366
Organismal Systems	Environmental adaptation	Circadian rhythm	1	13	0.925584	1	ko04710	LOC105232522(dco)	K08960
Human Diseases	Cancers	Melanoma	1	13	0.925584	1	ko05218	LOC105233659(GADD45A)	K04402
Human Diseases	Cancers	Glioma	3	30	0.928285	1	ko05214	LOC105225067(drk);LOC105225287(Eip63F-1);LOC105233659(GADD45A)	K04364+K02183+K04402
Organismal Systems	Nervous system	Cholinergic synapse	5	45	0.929819	1	ko04725	LOC105229487(KCNQ5);LOC105232029(Gnb5);LOC105232251(Ggamma30A);LOC109579326(Gnaq);LOC115066409(--)	K04930+K04539+K04547+K04634+K04930
Organismal Systems	Development	Axon guidance	7	60	0.936458	1	ko04360	LOC105223918(smo);LOC105226202(Wnt5);LOC105226958(CanA-14F);LOC105227058(Pak3);LOC105228861(NetB);LOC105232048(csw);LOC105233513(Src64B)	K06226+K00444+K04348+K04409+K06843+K07293+K05704
Environmental Information Processing	Signal transduction	VEGF signaling pathway	3	31	0.937904	1	ko04370	LOC105226958(CanA-14F);LOC105228807(MAPk-Ak2);LOC105233513(Src64B)	K04348+K04443+K05704
Human Diseases	Infectious diseases	Legionellosis	3	31	0.937904	1	ko05134	LOC105224006(Hsc70-1);LOC105227188(--);LOC105231830(Hsc70-2)	K03283+K15464+K03283
Metabolism	Glycan biosynthesis and metabolism	Glycosylphosphatidylinositol(GPI)-anchor biosynthesis	2	23	0.938768	1	ko00563	LOC105225030(--);LOC105233025(GPI11)	K09658+K05287
Environmental Information Processing	Signal transduction	ErbB signaling pathway	4	39	0.940787	1	ko04012	LOC105225067(drk);LOC105227058(Pak3);LOC105232151(hep);LOC105233513(Src64B)	K04364+K04409+K04431+K05704
Organismal Systems	Immune system	Th17 cell differentiation	2	24	0.94808	1	ko04659	LOC105226434(Hsp83);LOC105226958(CanA-14F)	K04079+K04348
Organismal Systems	Digestive system	Gastric acid secretion	4	40	0.948176	1	ko04971	LOC105225287(Eip63F-1);LOC105225453(Act57B);LOC105228222(Act79B);LOC109579326(Gnaq)	K02183+K05692+K05692+K04634
Cellular Processes	Cell growth and death	Cell cycle	9	76	0.949468	1	ko04110	LOC105223304(Mcm6);LOC105226613(Mcm2);LOC105227418(CycA);LOC105229089(Mcm7);LOC105230219(--);LOC105230699(anapc13);LOC105231705(CycB3);LOC105233659(GADD45A);LOC105234044(mei-41)	K02542+K02540+K06627+K02210+K13728+K12456+K21771+K04402+K06640
Human Diseases	Infectious diseases	Measles	3	33	0.953664	1	ko05162	LOC105224006(Hsc70-1);LOC105231830(Hsc70-2);LOC105233949(Rchy1)	K03283+K03283+K10144
Human Diseases	Cancers	Pancreatic cancer	2	25	0.956033	1	ko05212	LOC105226004(Rlip);LOC105233659(GADD45A)	K08773+K04402
Environmental Information Processing	Signal transduction	NF-kappa B signaling pathway	1	16	0.959208	1	ko04064	LOC105233659(GADD45A)	K04402
Cellular Processes	Cell growth and death	Necroptosis	4	42	0.96048	1	ko04217	LOC105222009(GlyP);LOC105222926(Gdh);LOC105224138(Gs2);LOC105226434(Hsp83)	K00688+K00261+K01915+K04079
Human Diseases	Infectious diseases	Hepatitis C	2	26	0.962813	1	ko05160	LOC105225067(drk);LOC105230907(Cd82)	K04364+K06508
Human Diseases	Drug resistance	Endocrine resistance	3	35	0.965625	1	ko01522	LOC105223205(Art4);LOC105225067(drk);LOC105233513(Src64B)	K05931+K04364+K05704
Human Diseases	Cancers	Colorectal cancer	3	35	0.965625	1	ko05210	LOC105225067(drk);LOC105232091(Axn);LOC105233659(GADD45A)	K04364+K02157+K04402
Human Diseases	Infectious diseases	African trypanosomiasis	1	17	0.96662	1	ko05143	LOC109579326(Gnaq)	K04634
Human Diseases	Infectious diseases	Salmonella infection	3	36	0.970451	1	ko05132	LOC105225453(Act57B);LOC105228222(Act79B);LOC105234174(Flnc)	K05692+K05692+K04437
Human Diseases	Infectious diseases	Amoebiasis	3	36	0.970451	1	ko05146	LOC105225618(Actn);LOC105232483(Lama1);LOC109579326(Gnaq)	K05699+K05637+K04634
Organismal Systems	Endocrine system	Progesterone-mediated oocyte maturation	5	52	0.970955	1	ko04914	LOC105226434(Hsp83);LOC105227418(CycA);LOC105230219(--);LOC105230699(anapc13);LOC105231705(CycB3)	K04079+K06627+K13728+K12456+K21771
Organismal Systems	Endocrine system	Relaxin signaling pathway	5	52	0.970955	1	ko04926	LOC105225067(drk);LOC105232029(Gnb5);LOC105232151(hep);LOC105232251(Ggamma30A);LOC105233513(Src64B)	K04364+K04539+K04431+K04547+K05704
Organismal Systems	Digestive system	Carbohydrate digestion and absorption	1	18	0.972688	1	ko04973	LOC105223186(Hex-t2)	K00844
Organismal Systems	Immune system	Fc epsilon RI signaling pathway	2	28	0.973487	1	ko04664	LOC105225067(drk);LOC105232151(hep)	K04364+K04431
Human Diseases	Cancers	Small cell lung cancer	2	28	0.973487	1	ko05222	LOC105232483(Lama1);LOC105233659(GADD45A)	K05637+K04402
Metabolism	Carbohydrate metabolism	Citrate cycle (TCA cycle)	3	37	0.974632	1	ko00020	LOC105224810(Idh1);LOC105228673(SdhA);LOC105232191(Pepck)	K00031+K00234+K01596
Human Diseases	Cancers	Renal cell carcinoma	3	37	0.974632	1	ko05211	LOC105225067(drk);LOC105227058(Pak3);LOC105232048(csw)	K04364+K04409+K07293
Human Diseases	Infectious diseases	Influenza A	10	90	0.975753	1	ko05164	LOC105224006(Hsc70-1);LOC105225162(thetaTry);LOC105225165(ami);LOC105225453(Act57B);LOC105227291(Pabp2);LOC105228222(Act79B);LOC105228391(TRYP4);LOC105230724(FDPS);LOC105231830(Hsc70-2);LOC105232151(hep)	K03283+K01312+K01312+K05692+K14396+K05692+K01312+K00787+K03283+K04431
Human Diseases	Endocrine and metabolic diseases	Cushing syndrome	6	61	0.975772	1	ko04934	LOC105226202(Wnt5);LOC105229170(crhr1);LOC105230829(Pde11);LOC105232091(Axn);LOC109579326(Gnaq);LOC115066525(Wnt4)	K00444+K04578+K13298+K02157+K04634+K01064
Organismal Systems	Endocrine system	Melanogenesis	4	46	0.977394	1	ko04916	LOC105225287(Eip63F-1);LOC105226202(Wnt5);LOC109579326(Gnaq);LOC115066525(Wnt4)	K02183+K00444+K04634+K01064
Genetic Information Processing	Replication and repair	Mismatch repair	1	19	0.977653	1	ko03430	LOC105223503(--)	K10740
Cellular Processes	Cell growth and death	Apoptosis - multiple species	1	19	0.977653	1	ko04215	LOC105224480(Dronc)	K20009
Human Diseases	Infectious diseases	Pertussis	1	19	0.977653	1	ko05133	LOC105225287(Eip63F-1)	K02183
Organismal Systems	Immune system	NOD-like receptor signaling pathway	3	38	0.978248	1	ko04621	LOC105221787(Dhx33);LOC105226171(Txn2);LOC105226434(Hsp83)	K17820+K03671+K04079
Genetic Information Processing	Transcription	Spliceosome	13	112	0.978439	1	ko03040	LOC105221965(SmD3);LOC105222537(Ddx17);LOC105224006(Hsc70-1);LOC105224424(Sf3b3);LOC105224781(Cherp);LOC105226454(hoip);LOC105228680(snrnp27);LOC105230192(ZK1098.1);LOC105230851(Ctnnbl1);LOC105231830(Hsc70-2);LOC105232797(Hrb87F);LOC105233342(Rbm25);LOC105233361(SRSF7)	K11088+K12823+K03283+K12830+K12841+K12845+K12846+K12821+K12864+K03283+K12741+K12822+K12896
Human Diseases	Infectious diseases	Tuberculosis	6	62	0.978639	1	ko05152	LOC105225287(Eip63F-1);LOC105226958(CanA-14F);LOC105227818(ATP6V0A1);LOC105231749(ATP6V0A1);LOC105231750(Atp6v0a1);LOC105233513(Src64B)	K02183+K04348+K02154+K02154+K02154+K05704
Environmental Information Processing	Signal transduction	Calcium signaling pathway	6	63	0.981189	1	ko04020	LOC105225287(Eip63F-1);LOC105226958(CanA-14F);LOC105229770(Cyp1);LOC105232922(SLC8A1);LOC105232923(Slc8a3);LOC109579326(Gnaq)	K02183+K04348+K09565+K05849+K05849+K04634
Organismal Systems	Immune system	IL-17 signaling pathway	1	20	0.981718	1	ko04657	LOC105226434(Hsp83)	K04079
Organismal Systems	Endocrine system	Cortisol synthesis and secretion	1	20	0.981718	1	ko04927	LOC109579326(Gnaq)	K04634
Human Diseases	Infectious diseases	Human cytomegalovirus infection	7	72	0.984273	1	ko05163	LOC105225067(drk);LOC105225287(Eip63F-1);LOC105226958(CanA-14F);LOC105232029(Gnb5);LOC105232251(Ggamma30A);LOC105233513(Src64B);LOC109579326(Gnaq)	K04364+K02183+K04348+K04539+K04547+K05704+K04634
Organismal Systems	Immune system	Th1 and Th2 cell differentiation	1	21	0.985044	1	ko04658	LOC105226958(CanA-14F)	K04348
Cellular Processes	Cellular community - eukaryotes	Gap junction	4	49	0.985321	1	ko04540	LOC105225067(drk);LOC105226868(betaTub56D);LOC105233513(Src64B);LOC109579326(Gnaq)	K04364+K07375+K05704+K04634
Metabolism	Carbohydrate metabolism	Inositol phosphate metabolism	3	41	0.986378	1	ko00562	LOC105222319(Inos);LOC105229147(Mtmr14);LOC105232682(impad1)	K01858+K18086+K15759
Genetic Information Processing	Translation	RNA transport	13	117	0.986963	1	ko03013	LOC105223739(Nup154);LOC105224190(Rpp30);LOC105224740(POP1);LOC105225293(eIF2beta);LOC105225502(Nup153);LOC105226535(tacc3);LOC105227110(Pym);LOC105229153(STRAP);LOC105229288(EIF4EBP1);LOC105231914(Eif4e2);LOC105233134(--);LOC105233162(Nup205);LOC109580059(--)	K14312+K03539+K01164+K03238+K14296+K14283+K14294+K13137+K18644+K03259+K13114+K14310+K14314
Cellular Processes	Cell growth and death	Apoptosis	5	58	0.987036	1	ko04210	LOC105225453(Act57B);LOC105226824(Cp1);LOC105228222(Act79B);LOC105232835(Ctla2a);LOC105233659(GADD45A)	K05692+K01365+K05692+K01365+K04402
Organismal Systems	Excretory system	Vasopressin-regulated water reabsorption	1	22	0.987766	1	ko04962	LOC105232186(ctp)	K10418
Organismal Systems	Endocrine system	Parathyroid hormone synthesis, secretion and action	3	42	0.98837	1	ko04928	LOC105224296(Trpv5);LOC105225090(Lrp6);LOC109579326(Gnaq)	K04974+K03068+K04634
Organismal Systems	Endocrine system	Thyroid hormone signaling pathway	6	67	0.988811	1	ko04919	LOC105224618(Pfk);LOC105225453(Act57B);LOC105228222(Act79B);LOC105229794(Mhc);LOC105231615(pnr);LOC105233513(Src64B)	K00850+K05692+K05692+K17751+K09183+K05704
Organismal Systems	Aging	Longevity regulating pathway - mammal	3	43	0.99008	1	ko04211	LOC105231914(Eif4e2);LOC105233742(foxo);LOC105234144(foxo)	K03259+K09408+K09408
Cellular Processes	Cell growth and death	Oocyte meiosis	6	69	0.991425	1	ko04114	LOC105225287(Eip63F-1);LOC105226958(CanA-14F);LOC105228592(flw);LOC105230219(--);LOC105230245(Pp1alpha-96A);LOC105230699(anapc13)	K02183+K04348+K06269+K13728+K06269+K12456
Organismal Systems	Nervous system	Long-term depression	2	35	0.992121	1	ko04730	LOC105229170(crhr1);LOC109579326(Gnaq)	K04578+K04634
Environmental Information Processing	Signal transduction	TNF signaling pathway	1	26	0.994526	1	ko04668	LOC105232151(hep)	K04431
Genetic Information Processing	Folding, sorting and degradation	Ubiquitin mediated proteolysis	7	81	0.995025	1	ko04120	LOC105224961(KLHL12);LOC105226122(HERC2);LOC105229988(CUL4B);LOC105230699(anapc13);LOC105232205(--);LOC105233714(sina);LOC105233949(Rchy1)	K10456+K10595+K10609+K12456+K10456+K04506+K10144
Organismal Systems	Digestive system	Pancreatic secretion	7	81	0.995025	1	ko04972	LOC105224532(PLA2);LOC105225162(thetaTry);LOC105225165(ami);LOC105225976(Slc12a2);LOC105227365(PLA2G12B);LOC105228391(TRYP4);LOC109579326(Gnaq)	K01047+K01312+K01312+K10951+K01047+K01312+K04634
Human Diseases	Infectious diseases	Herpes simplex infection	5	65	0.99518	1	ko05168	LOC105225520(CG1785);LOC105228592(flw);LOC105230245(Pp1alpha-96A);LOC105232048(csw);LOC105233361(SRSF7)	K14840+K06269+K06269+K07293+K12896
Organismal Systems	Immune system	Toll-like receptor signaling pathway	1	27	0.995524	1	ko04620	LOC105232151(hep)	K04431
Environmental Information Processing	Signal transduction	HIF-1 signaling pathway	4	59	0.996743	1	ko04066	LOC105223186(Hex-t2);LOC105224618(Pfk);LOC105231405(ImpL3);LOC105231914(Eif4e2)	K00844+K00850+K00016+K03259
Genetic Information Processing	Folding, sorting and degradation	RNA degradation	3	50	0.996822	1	ko03018	LOC105224618(Pfk);LOC105227093(Dis3);LOC105233196(EXOSC10)	K00850+K12585+K12591
Human Diseases	Infectious diseases	Hepatitis B	3	51	0.997307	1	ko05161	LOC105225067(drk);LOC105227418(CycA);LOC105233513(Src64B)	K04364+K06627+K05704
Environmental Information Processing	Signal transduction	mTOR signaling pathway	8	95	0.997772	1	ko04150	LOC105225067(drk);LOC105225090(Lrp6);LOC105226202(Wnt5);LOC105227271(Rictor);LOC105229852(SLC3A2);LOC105231914(Eif4e2);LOC105232161(Vha13);LOC115066525(Wnt4)	K04364+K03068+K00444+K08267+K06519+K03259+K02152+K01064
Human Diseases	Infectious diseases	HTLV-I infection	9	103	0.997809	1	ko05166	LOC105223811(dlg1);LOC105224246(dlg1);LOC105224983(Myb);LOC105226202(Wnt5);LOC105226958(CanA-14F);LOC105230724(FDPS);LOC105234044(mei-41);LOC115065999(dlg1);LOC115066525(Wnt4)	K12076+K12076+K09420+K00444+K04348+K00787+K06640+K12076+K01064
Environmental Information Processing	Signal transduction	TGF-beta signaling pathway	1	31	0.998	1	ko04350	LOC105225728(Actbeta)	K22687
Organismal Systems	Nervous system	Retrograde endocannabinoid signaling	5	73	0.998525	1	ko04723	LOC105224042(Grd);LOC105228248(Dagla);LOC105232029(Gnb5);LOC105232251(Ggamma30A);LOC109579326(Gnaq)	K05175+K13806+K04539+K04547+K04634
Organismal Systems	Digestive system	Salivary secretion	3	58	0.999172	1	ko04970	LOC105225287(Eip63F-1);LOC105225976(Slc12a2);LOC109579326(Gnaq)	K02183+K10951+K04634
Genetic Information Processing	Folding, sorting and degradation	Proteasome	1	37	0.999404	1	ko03050	LOC105233967(PSMB5)	K02737
Human Diseases	Endocrine and metabolic diseases	AGE-RAGE signaling pathway in diabetic complications	1	38	0.999513	1	ko04933	LOC105231569(Pkc98E)	K18050
Organismal Systems	Endocrine system	Insulin secretion	2	52	0.999637	1	ko04911	LOC109579191(SK);LOC109579326(Gnaq)	K04944+K04634
Cellular Processes	Transport and catabolism	Endocytosis	8	109	0.999674	1	ko04144	LOC105222101(--);LOC105223991(btl);LOC105224006(Hsc70-1);LOC105228649(Tret1-2);LOC105231724(snf8);LOC105231830(Hsc70-2);LOC105233513(Src64B);LOC105233528(Rab11fip2)	K06564+K05093+K03283+K06069+K12188+K03283+K05704+K12484
Environmental Information Processing	Signal transduction	Sphingolipid signaling pathway	3	64	0.999705	1	ko04071	LOC105231569(Pkc98E);LOC105231761(CDase);LOC109579326(Gnaq)	K18050+K12349+K04634
Human Diseases	Infectious diseases	Epstein-Barr virus infection	6	98	0.999874	1	ko05169	LOC105223075(Polr1c);LOC105224006(Hsc70-1);LOC105224743(Polr3h);LOC105227418(CycA);LOC105231830(Hsc70-2);LOC105232151(hep)	K03027+K03283+K03022+K06627+K03283+K04431
Human Diseases	Neurodegenerative diseases	Huntington disease	10	146	0.999982	1	ko05016	LOC105224751(Dnai2);LOC105225028(GPXMC1);LOC105226545(Dnah17);LOC105228673(SdhA);LOC105229447(Sod1);LOC105229770(Cyp1);LOC105230004(Dnal4);LOC105233100(Grin2b);LOC109579326(Gnaq);LOC109580066(--)	K11143+K00432+K10408+K00234+K04565+K09565+K10412+K05210+K04634+K05210
Cellular Processes	Transport and catabolism	Autophagy - animal	4	91	0.999984	1	ko04140	LOC105226824(Cp1);LOC105227188(--);LOC105229147(Mtmr14);LOC105232835(Ctla2a)	K01365+K15464+K18086+K01365
Human Diseases	Neurodegenerative diseases	Alzheimer disease	7	123	0.999989	1	ko05010	LOC105225287(Eip63F-1);LOC105226958(CanA-14F);LOC105228673(SdhA);LOC105233100(Grin2b);LOC105233740(--);LOC109579326(Gnaq);LOC109580066(--)	K02183+K04348+K00234+K05210+K04380+K04634+K05210
Metabolism	Energy metabolism	Oxidative phosphorylation	5	109	0.999996	1	ko00190	LOC105227818(ATP6V0A1);LOC105228673(SdhA);LOC105231749(ATP6V0A1);LOC105231750(Atp6v0a1);LOC105232161(Vha13)	K02154+K00234+K02154+K02154+K02152
Organismal Systems	Environmental adaptation	Thermogenesis	8	151	1	1	ko04714	LOC105224678(SPAC19A8.14);LOC105225067(drk);LOC105225453(Act57B);LOC105228222(Act79B);LOC105228673(SdhA);LOC105230125(--);LOC105230478(Npr1);MSTRG.8496(--)	K18177+K04364+K05692+K05692+K00234+K12323+K12323+K12323
Human Diseases	Neurodegenerative diseases	Parkinson disease	3	100	1	1	ko05012	LOC105227310(DAT);LOC105228673(SdhA);LOC105229770(Cyp1)	K05036+K00234+K09565
Genetic Information Processing	Translation	Ribosome	2	123	1	1	ko03010	LOC105222138(RpS20);LOC105224390(rlp7)	K02969+K02937
Human Diseases	Endocrine and metabolic diseases	Non-alcoholic fatty liver disease (NAFLD)	1	96	1	1	ko04932	LOC105228673(SdhA)	K00234

## Sheet: Rect-0d-vs-Rect-9d.path
												KEGG_A_class	KEGG_B_class	Pathway	Rect-0d-vs-Rect-9d (598)	All (3263)	Pvalue	Qvalue	Pathway ID	Genes	K_IDs
												Genetic Information Processing	Translation	Ribosome biogenesis in eukaryotes	33	66	3.54048e-09	1.09755e-06	ko03008	LOC105222115(wcd);LOC105222200(utp15);LOC105222326(TBL3);LOC105222593(PWP2);LOC105222801(Rrp7a);LOC105222975(Rtc1);LOC105223175(l(1)G0020);LOC105223338(Mat89Ba);LOC105224190(Rpp30);LOC105224199(--);LOC105224702(Nop60B);LOC105224740(POP1);LOC105224742(RIOK1);LOC105224868(BMS1);LOC105225240(Utp14a);LOC105225370(Rbm28);LOC105225517(NOB1);LOC105226454(hoip);LOC105226475(UTP4);LOC105227280(l(2)k09022)…	K14553+K14549+K14555+K14558+K14545+K11108+K14521+K14544+K03539+K14552+K11131+K01164+K07178+K14569+K14567+K14573+K11883+K12845+K14548+K14550+K14546+K14563+K03264+K11129+K11130+K14554+K14556+K14566+K14568+K07562+K14564+K14565+K11128
												Metabolism	Global and overview maps	Metabolic pathways	211	877	3.22744e-07	5.00254e-05	ko01100	LOC105221826(KFase);LOC105221963(ALPL);LOC105222006(GALM);LOC105222009(GlyP);LOC105222132(SGSH);LOC105222319(Inos);LOC105222459(CdsA);LOC105222518(ALN);LOC105222650(slgA);LOC105222689(Gld);LOC105222716(Prat);LOC105222766(Shmt1);LOC105222790(Spr);LOC105222791(--);LOC105222808(Galt);LOC105222926(Gdh);LOC105223075(Polr1c);LOC105223108(HMT-1);LOC105223311(AAO2);LOC105223314(AAO2);LOC105223344(Mccc1);…	K01432+K01077+K01785+K00688+K01565+K01858+K00981+K01466+K00318+K00115+K00764+K00600+K00072+K00072+K00965+K00261+K03027+K00547+K00106+K00106+K01968+K07151+K03002+K10258+K08764+K01937+K01937+K01135+K19269+K01251+K01915+K10251+K00294+K12657+K01697+K14455+K00128+K01047+K00002+K07151+K00281+K00850+K01176+K01077+K03022+K01077+K01077+K01183+K00031+K01580+K01555+K00699+K01074+K13247+K09658+K01251+K00993+…
												Metabolism	Xenobiotics biodegradation and metabolism	Drug metabolism - cytochrome P450	25	57	6.3658e-06	0.0006578	ko00982	LOC105222427(GstD7);LOC105224360(MGST1);LOC105224876(Ugt1a2);LOC105225812(GST1);LOC105225817(GstD1);LOC105225871(GST1);LOC105225994(Gst4);LOC105227725(GST1);LOC105228298(GSTT1);LOC105228691(GstS1);LOC105229681(GST1);LOC105229689(GST1);LOC105229690(GstD1);LOC105230262(UGT8);LOC105230268(Ugt1a1);LOC105230325(ugt3);LOC105230805(UGT2B13);LOC105231237(UGT2B15);LOC105232212(--);LOC105232983(Adh);LOC105…	K00799+K00799+K00699+K00799+K00799+K00799+K00799+K00799+K00799+K04097+K00799+K00799+K00799+K00699+K00699+K00699+K00699+K00699+K00699+K00001+K00001+K00799+K00799+K00699+K00799
												Metabolism	Xenobiotics biodegradation and metabolism	Metabolism of xenobiotics by cytochrome P450	25	60	1.90599e-05	0.00147715	ko00980	LOC105222427(GstD7);LOC105224360(MGST1);LOC105224876(Ugt1a2);LOC105225812(GST1);LOC105225817(GstD1);LOC105225871(GST1);LOC105225994(Gst4);LOC105227725(GST1);LOC105228298(GSTT1);LOC105228691(GstS1);LOC105229681(GST1);LOC105229689(GST1);LOC105229690(GstD1);LOC105230262(UGT8);LOC105230268(Ugt1a1);LOC105230325(ugt3);LOC105230805(UGT2B13);LOC105231237(UGT2B15);LOC105232212(--);LOC105232983(Adh);LOC105…	K00799+K00799+K00699+K00799+K00799+K00799+K00799+K00799+K00799+K04097+K00799+K00799+K00799+K00699+K00699+K00699+K00699+K00699+K00699+K00001+K00001+K00799+K00799+K00699+K00799
												Metabolism	Xenobiotics biodegradation and metabolism	Drug metabolism - other enzymes	31	84	3.59624e-05	0.00222967	ko00983	LOC105222427(GstD7);LOC105223311(AAO2);LOC105223314(AAO2);LOC105224360(MGST1);LOC105224876(Ugt1a2);LOC105225812(GST1);LOC105225817(GstD1);LOC105225871(GST1);LOC105225994(Gst4);LOC105226045(UPP1);LOC105226072(Nme7);LOC105227725(GST1);LOC105228298(GSTT1);LOC105228611(ras);LOC105229681(GST1);LOC105229689(GST1);LOC105229690(GstD1);LOC105230262(UGT8);LOC105230268(Ugt1a1);LOC105230325(ugt3);LOC10523066…	K00799+K00106+K00106+K00799+K00699+K00799+K00799+K00799+K00799+K00757+K00940+K00799+K00799+K00088+K00799+K00799+K00799+K00699+K00699+K00699+K10808+K00699+K00757+K00699+K13421+K00699+K00757+K00799+K00799+K00699+K00799
												Human Diseases	Cancers	Chemical carcinogenesis	23	57	7.54868e-05	0.00335301	ko05204	LOC105222427(GstD7);LOC105224360(MGST1);LOC105224876(Ugt1a2);LOC105225812(GST1);LOC105225817(GstD1);LOC105225871(GST1);LOC105225994(Gst4);LOC105227725(GST1);LOC105228298(GSTT1);LOC105228691(GstS1);LOC105229681(GST1);LOC105229689(GST1);LOC105229690(GstD1);LOC105230262(UGT8);LOC105230268(Ugt1a1);LOC105230325(ugt3);LOC105230805(UGT2B13);LOC105231237(UGT2B15);LOC105232212(--);LOC105234081(MGST1);LOC1…	K00799+K00799+K00699+K00799+K00799+K00799+K00799+K00799+K00799+K04097+K00799+K00799+K00799+K00699+K00699+K00699+K00699+K00699+K00699+K00799+K00799+K00699+K00799
												Human Diseases	Cardiovascular diseases	Hypertrophic cardiomyopathy (HCM)	15	30	7.57132e-05	0.00335301	ko05410	LOC105225453(Act57B);LOC105226581(Tm2);LOC105226582(Tm1);LOC105228222(Act79B);LOC105229185(--);LOC105229580(Act88F);LOC105229794(Mhc);LOC105229889(Act87E);LOC105229913(Slc8a1);LOC105231331(CACNA2D3);LOC105232276(Acer);LOC105232277(Ance);LOC105232878(ACE);LOC105232922(SLC8A1);LOC105232923(Slc8a3)	K05692+K10374+K10373+K05692+K01283+K05692+K17751+K05692+K05849+K04860+K01283+K01283+K01283+K05849+K05849
												Metabolism	Metabolism of terpenoids and polyketides	Insect hormone biosynthesis	17	37	9.79815e-05	0.00379678	ko00981	LOC105223819(SDR-1);LOC105223822(SDR-1);LOC105223827(SDR-1);LOC105224512(Aldh1b1);LOC105225301(spo);LOC105225924(shd);LOC105227167(PKS19);LOC105227882(SDR-1);LOC105227938(SDR-1);LOC105228715(jhamt);LOC105229967(Ces2a);LOC105229968(Est-5A);LOC105230714(EH2);LOC105232612(PGLP2);LOC105232720(--);LOC109579509(daf-36);LOC109580008(--)	K15890+K15890+K15890+K00128+K14939+K10723+K10718+K15890+K15890+K10718+K01063+K01063+K10719+K21013+K21013+K14938+K21013
												Human Diseases	Cardiovascular diseases	Fluid shear stress and atherosclerosis	26	77	0.000770896	0.0265531	ko05418	LOC105222427(GstD7);LOC105224360(MGST1);LOC105224961(KLHL12);LOC105225453(Act57B);LOC105225812(GST1);LOC105225817(GstD1);LOC105225871(GST1);LOC105225994(Gst4);LOC105226058(RhoL);LOC105226171(Txn2);LOC105226434(Hsp83);LOC105226824(Cp1);LOC105227725(GST1);LOC105228222(Act79B);LOC105228298(GSTT1);LOC105229580(Act88F);LOC105229681(GST1);LOC105229689(GST1);LOC105229690(GstD1);LOC105229889(Act87E);LOC1…	K00799+K00799+K10456+K05692+K00799+K00799+K00799+K00799+K04392+K03671+K04079+K01365+K00799+K05692+K00799+K05692+K00799+K00799+K00799+K05692+K10456+K09487+K01365+K00799+K00799+K00799
												Organismal Systems	Endocrine system	Renin secretion	14	33	0.00109089	0.030792	ko04924	LOC105221964(olf186-F);LOC105222892(Galphaq);LOC105222909(Gnaq);LOC105226958(CanA-14F);LOC105229185(--);LOC105230125(--);LOC105230478(Npr1);LOC105231043(Gycalpha99B);LOC105232276(Acer);LOC105232277(Ance);LOC105232516(GUCY1B1);LOC105232878(ACE);LOC109579326(Gnaq);MSTRG.8496(--)	K16056+K04634+K04634+K04348+K01283+K12323+K12323+K12318+K01283+K01283+K12319+K01283+K04634+K12323
												Metabolism	Lipid metabolism	Glycerophospholipid metabolism	20	55	0.00109262	0.030792	ko00564	LOC105222107(Taz);LOC105222459(CdsA);LOC105222526(nes);LOC105224532(PLA2);LOC105225068(chpt1);LOC105225662(Gpd2);LOC105226010(GNPAT);LOC105227191(PTDSS1);LOC105227365(PLA2G12B);LOC105227484(eas);LOC105227846(PLPP1);LOC105227847(PLPP3);LOC105227848(PLPP1);LOC105228129(Gpat4);LOC105229745(CG8745);LOC105229768(ACHE1);LOC105230334(CG34384);LOC105232554(--);LOC105233389(SELENOI);LOC105233936(--)	K13511+K00981+K13515+K01047+K00993+K00111+K00649+K08729+K01047+K00894+K01080+K01080+K01080+K13506+K14286+K01049+K00901+K01047+K00993+K00111
												Metabolism	Global and overview maps	Fatty acid metabolism	16	42	0.00194352	0.0502076	ko01212	LOC105223612(TECR);LOC105224237(hsd17b12a);LOC105224915(Ppt1);LOC105227875(ACADSB);LOC105229168(CG5009);LOC105229169(CG5009);LOC105230446(Acads);LOC105230729(CG5009);LOC105231230(HSDL1);LOC105231281(CG12262);LOC105231787(D11DS);LOC105232303(bgm);LOC105232304(CG4500);LOC105232306(CG4500);LOC105232621(ACAT2);LOC105233729(Scd1)	K10258+K10251+K01074+K09478+K00232+K00232+K00248+K00232+K10251+K00249+K00507+K15013+K15013+K15013+K00626+K00507
												Human Diseases	Cardiovascular diseases	Dilated cardiomyopathy (DCM)	12	28	0.00222452	0.0530462	ko05414	LOC105225453(Act57B);LOC105225576(Adcy9);LOC105226581(Tm2);LOC105226582(Tm1);LOC105228222(Act79B);LOC105229580(Act88F);LOC105229794(Mhc);LOC105229889(Act87E);LOC105229913(Slc8a1);LOC105231331(CACNA2D3);LOC105232922(SLC8A1);LOC105232923(Slc8a3)	K05692+K08049+K10374+K10373+K05692+K05692+K17751+K05692+K05849+K04860+K05849+K05849
												Human Diseases	Drug resistance	Platinum drug resistance	17	48	0.00351412	0.0778127	ko01524	LOC105222427(GstD7);LOC105224360(MGST1);LOC105225577(Pdk1);LOC105225812(GST1);LOC105225817(GstD1);LOC105225871(GST1);LOC105225994(Gst4);LOC105227725(GST1);LOC105228298(GSTT1);LOC105229681(GST1);LOC105229689(GST1);LOC105229690(GstD1);LOC105231062(--);LOC105233538(Cyt-c-p);LOC105234081(MGST1);LOC109579500(GST1);MSTRG.6737(GstD1)	K00799+K00799+K06276+K00799+K00799+K00799+K00799+K00799+K00799+K00799+K00799+K00799+K14686+K08738+K00799+K00799+K00799
												Metabolism	Amino acid metabolism	Arginine and proline metabolism	14	37	0.00395912	0.080568	ko00330	LOC105222650(slgA);LOC105224253(ALDH4A1);LOC105224260(Aldh18a1);LOC105224406(GOT2);LOC105224512(Aldh1b1);LOC105225237(Oat);LOC105226309(daao-1);LOC105226480(Got1);LOC105226774(P4HA2);LOC105226778(P4HA2);LOC105231755(P4HA2);LOC105231756(P4HA1);LOC105231760(P4HA1);LOC105232635(Argk)	K00318+K00294+K12657+K14455+K00128+K00819+K00273+K14454+K00472+K00472+K00472+K00472+K00472+K00933
												Human Diseases	Cancers	Hepatocellular carcinoma	28	94	0.00415835	0.080568	ko05225	LOC105222427(GstD7);LOC105222837(Egfr);LOC105224044(fz);LOC105224360(MGST1);LOC105224558(TGFBR1);LOC105224961(KLHL12);LOC105225090(Lrp6);LOC105225453(Act57B);LOC105225812(GST1);LOC105225817(GstD1);LOC105225871(GST1);LOC105225994(Gst4);LOC105226202(Wnt5);LOC105226733(Pkc53E);LOC105227682(Wnt2);LOC105227725(GST1);LOC105228222(Act79B);LOC105228298(GSTT1);LOC105229580(Act88F);LOC105229681(GST1);LOC10…	K00799+K04361+K02432+K00799+K04674+K10456+K03068+K05692+K00799+K00799+K00799+K00799+K00444+K02677+K00572+K00799+K05692+K00799+K05692+K00799+K00799+K00799+K05692+K02157+K10456+K00799+K00799+K00799
												Metabolism	Metabolism of cofactors and vitamins	Retinol metabolism	13	34	0.00489712	0.0893004	ko00830	LOC105224876(Ugt1a2);LOC105229342(Sdr16c6);LOC105230262(UGT8);LOC105230268(Ugt1a1);LOC105230325(ugt3);LOC105230377(RDH12);LOC105230785(DGAT1);LOC105230805(UGT2B13);LOC105231237(UGT2B15);LOC105232212(--);LOC105232983(Adh);LOC105232985(Adh);LOC109579516(--)	K00699+K15734+K00699+K00699+K00699+K11153+K11155+K00699+K00699+K00699+K00001+K00001+K00699
												Metabolism	Lipid metabolism	Biosynthesis of unsaturated fatty acids	8	17	0.00622313	0.10716	ko01040	LOC105223612(TECR);LOC105224237(hsd17b12a);LOC105229168(CG5009);LOC105229169(CG5009);LOC105230729(CG5009);LOC105231230(HSDL1);LOC105231787(D11DS);LOC105233729(Scd1)	K10258+K10251+K00232+K00232+K00232+K10251+K00507+K00507
												Human Diseases	Cancers	Prostate cancer	20	63	0.00675395	0.10716	ko05215	LOC105222427(GstD7);LOC105222837(Egfr);LOC105223991(btl);LOC105224360(MGST1);LOC105225577(Pdk1);LOC105225812(GST1);LOC105225817(GstD1);LOC105225871(GST1);LOC105225994(Gst4);LOC105226434(Hsp83);LOC105227627(Cdk2);LOC105227725(GST1);LOC105228298(GSTT1);LOC105229681(GST1);LOC105229689(GST1);LOC105229690(GstD1);LOC105232524(HSP90B1);LOC105234081(MGST1);LOC109579500(GST1);MSTRG.6737(GstD1)	K00799+K04361+K05093+K00799+K06276+K00799+K00799+K00799+K00799+K04079+K02206+K00799+K00799+K00799+K00799+K00799+K09487+K00799+K00799+K00799
												Metabolism	Metabolism of other amino acids	Glutathione metabolism	19	59	0.00691355	0.10716	ko00480	LOC105222427(GstD7);LOC105224360(MGST1);LOC105224810(Idh1);LOC105225812(GST1);LOC105225817(GstD1);LOC105225871(GST1);LOC105225994(Gst4);LOC105227725(GST1);LOC105228298(GSTT1);LOC105228691(GstS1);LOC105229681(GST1);LOC105229689(GST1);LOC105229690(GstD1);LOC105230669(RnrS);LOC105230937(Anpep);LOC105234081(MGST1);LOC109579500(GST1);LOC115065834(Ggct);MSTRG.6737(GstD1)	K00799+K00799+K00031+K00799+K00799+K00799+K00799+K00799+K00799+K04097+K00799+K00799+K00799+K10808+K11140+K00799+K00799+K00682+K00799
												Metabolism	Amino acid metabolism	Tyrosine metabolism	9	21	0.00791412	0.107616	ko00350	LOC105224406(GOT2);LOC105224873(FAH);LOC105226480(Got1);LOC105231903(yellow-f2);LOC105232983(Adh);LOC105232985(Adh);LOC105233819(hgo);LOC105234241(amd);LOC115066680(hgo)	K14455+K01555+K14454+K22203+K00001+K00001+K00451+K01618+K00451
												Metabolism	Lipid metabolism	Fatty acid degradation	13	36	0.00853628	0.107616	ko00071	LOC105224512(Aldh1b1);LOC105227875(ACADSB);LOC105229168(CG5009);LOC105229169(CG5009);LOC105230446(Acads);LOC105230729(CG5009);LOC105231281(CG12262);LOC105232303(bgm);LOC105232304(CG4500);LOC105232306(CG4500);LOC105232621(ACAT2);LOC105232983(Adh);LOC105232985(Adh)	K00128+K09478+K00232+K00232+K00248+K00232+K00249+K15013+K15013+K15013+K00626+K00001+K00001
												Organismal Systems	Endocrine system	PPAR signaling pathway	13	36	0.00853628	0.107616	ko03320	LOC105223876(SCP2);LOC105225577(Pdk1);LOC105229168(CG5009);LOC105229169(CG5009);LOC105230729(CG5009);LOC105231281(CG12262);LOC105231787(D11DS);LOC105232191(Pepck);LOC105232303(bgm);LOC105232304(CG4500);LOC105232306(CG4500);LOC105233729(Scd1);MSTRG.2113(SLC27A4)	K08764+K06276+K00232+K00232+K00232+K00249+K00507+K01596+K15013+K15013+K15013+K00507+K08745
												Organismal Systems	Sensory system	Phototransduction - fly	13	36	0.00853628	0.107616	ko04745	LOC105222892(Galphaq);LOC105222909(Gnaq);LOC105222936(ninaC);LOC105225234(Gbeta76C);LOC105225379(inaD);LOC105225453(Act57B);LOC105226733(Pkc53E);LOC105228222(Act79B);LOC105228248(Dagla);LOC105229580(Act88F);LOC105229889(Act87E);LOC105232251(Ggamma30A);LOC109579326(Gnaq)	K04634+K04634+K08834+K07972+K13804+K05692+K02677+K05692+K13806+K05692+K05692+K04547+K04634
												Organismal Systems	Aging	Longevity regulating pathway - worm	23	77	0.00867872	0.107616	ko04212	LOC105222427(GstD7);LOC105222720(wat);LOC105224360(MGST1);LOC105225812(GST1);LOC105225817(GstD1);LOC105225825(wat);LOC105225838(wat);LOC105225871(GST1);LOC105225994(Gst4);LOC105226693(far1);LOC105227725(GST1);LOC105228298(GSTT1);LOC105229681(GST1);LOC105229689(GST1);LOC105229690(GstD1);LOC105230858(far1);LOC105231787(D11DS);LOC105231797(sima);LOC105233729(Scd1);LOC105234081(MGST1);LOC109579500(GS…	K00799+K13356+K00799+K00799+K00799+K13356+K13356+K00799+K00799+K13356+K00799+K00799+K00799+K00799+K00799+K13356+K00507+K08268+K00507+K00799+K00799+K14938+K00799
												Human Diseases	Cardiovascular diseases	Arrhythmogenic right ventricular cardiomyopathy (ARVC)	8	18	0.00943669	0.112514	ko05412	LOC105225453(Act57B);LOC105228222(Act79B);LOC105229580(Act88F);LOC105229889(Act87E);LOC105229913(Slc8a1);LOC105231331(CACNA2D3);LOC105232922(SLC8A1);LOC105232923(Slc8a3)	K05692+K05692+K05692+K05692+K05849+K04860+K05849+K05849
												Metabolism	Lipid metabolism	Ether lipid metabolism	9	22	0.011265	0.129338	ko00565	LOC105224532(PLA2);LOC105225068(chpt1);LOC105227365(PLA2G12B);LOC105227846(PLPP1);LOC105227847(PLPP3);LOC105227848(PLPP1);LOC105232554(--);LOC105233389(SELENOI);MSTRG.937(--)	K01047+K00993+K01047+K01080+K01080+K01080+K01047+K00993+K16794
												Organismal Systems	Digestive system	Protein digestion and absorption	19	62	0.0122861	0.129626	ko04974	LOC105222506(Slc36a2);LOC105222522(--);LOC105223011(yin);LOC105223013(yin);LOC105223014(yin);LOC105223909(Col4a1);LOC105223911(COL4A1);LOC105225162(thetaTry);LOC105225165(ami);LOC105226708(SLC36A4);LOC105228391(TRYP4);LOC105229852(SLC3A2);LOC105229913(Slc8a1);LOC105230174(Col1a2);LOC105231156(SLC9A3);LOC105232922(SLC8A1);LOC105232923(Slc8a3);LOC109579825(thetaTry);MSTRG.3707(--)	K14209+K08131+K14206+K14206+K14206+K06237+K06237+K01312+K01312+K14209+K01312+K06519+K05849+K19719+K12040+K05849+K05849+K01312+K14209
												Organismal Systems	Digestive system	Fat digestion and absorption	10	26	0.0125376	0.129626	ko04975	LOC105224406(GOT2);LOC105224532(PLA2);LOC105227365(PLA2G12B);LOC105227846(PLPP1);LOC105227847(PLPP3);LOC105227848(PLPP1);LOC105230785(DGAT1);LOC105232554(--);LOC105232621(ACAT2);MSTRG.2113(SLC27A4)	K14455+K01047+K01047+K01080+K01080+K01080+K11155+K01047+K00626+K08745
												Metabolism	Glycan biosynthesis and metabolism	Other types of O-glycan biosynthesis	6	12	0.0125444	0.129626	ko00514	LOC105224723(GA16561);LOC105225106(Eogt);LOC105225562(tw);LOC105227401(rt);LOC105230239(st6gal2);LOC105231804(rumi)	K11703+K18134+K00728+K00728+K00778+K13667
												Metabolism	Metabolism of cofactors and vitamins	Thiamine metabolism	8	19	0.0137392	0.133934	ko00730	LOC105221963(ALPL);LOC105224718(Alp-m);LOC105224766(ALPPL2);LOC105224767(Alp-m);LOC105226111(Alp-m);LOC105226149(ALPL);LOC105226349(stp1);LOC105227008(Alp4)	K01077+K01077+K01077+K01077+K01077+K01077+K14394+K01077
												Metabolism	Metabolism of cofactors and vitamins	Folate biosynthesis	12	34	0.0138254	0.133934	ko00790	LOC105221963(ALPL);LOC105222790(Spr);LOC105222791(--);LOC105224718(Alp-m);LOC105224766(ALPPL2);LOC105224767(Alp-m);LOC105226111(Alp-m);LOC105226149(ALPL);LOC105227008(Alp4);LOC105228657(Pu);LOC105229079(Mocs1);LOC105231029(Pcd)	K01077+K00072+K00072+K01077+K01077+K01077+K01077+K01077+K01077+K01495+K20967+K01724
												Environmental Information Processing	Signaling molecules and interaction	ECM-receptor interaction	7	16	0.0166056	0.155992	ko04512	LOC105222522(--);LOC105222583(thbs3a);LOC105223909(Col4a1);LOC105223911(COL4A1);LOC105227172(SSPO);LOC105230174(Col1a2);LOC105232696(LanA)	K08131+K04659+K06237+K06237+K03900+K19719+K06240
												Human Diseases	Cancers	Pathways in cancer	45	184	0.0197099	0.168227	ko05200	LOC105222427(GstD7);LOC105222837(Egfr);LOC105222892(Galphaq);LOC105222909(Gnaq);LOC105223909(Col4a1);LOC105223911(COL4A1);LOC105223918(smo);LOC105223991(btl);LOC105224044(fz);LOC105224360(MGST1);LOC105224558(TGFBR1);LOC105224961(KLHL12);LOC105225090(Lrp6);LOC105225576(Adcy9);LOC105225811(CASP7);LOC105225812(GST1);LOC105225817(GstD1);LOC105225871(GST1);LOC105225994(Gst4);LOC105226058(RhoL);LOC1052…	K00799+K04361+K04634+K04634+K06237+K06237+K06226+K05093+K02432+K00799+K04674+K10456+K03068+K08049+K04397+K00799+K00799+K00799+K00799+K04392+K00444+K04079+K05119+K02677+K06627+K02206+K00572+K00799+K00799+K01679+K00799+K00799+K00799+K08268+K04539+K02157+K10456+K04547+K09487+K06240+K08738+K00799+K04634+K00799+K00799
												Metabolism	Lipid metabolism	alpha-Linolenic acid metabolism	6	13	0.0197527	0.168227	ko00592	LOC105224532(PLA2);LOC105227365(PLA2G12B);LOC105229168(CG5009);LOC105229169(CG5009);LOC105230729(CG5009);LOC105232554(--)	K01047+K01047+K00232+K00232+K00232+K01047
												Organismal Systems	Endocrine system	Renin-angiotensin system	6	13	0.0197527	0.168227	ko04614	LOC105229185(--);LOC105230937(Anpep);LOC105232276(Acer);LOC105232277(Ance);LOC105232878(ACE);LOC105233746(ANPEP)	K01283+K11140+K01283+K01283+K01283+K11141
												Metabolism	Carbohydrate metabolism	Amino sugar and nucleotide sugar metabolism	15	48	0.0206768	0.168227	ko00520	LOC105222808(Galt);LOC105224788(Cht2);LOC105225298(CG10688);LOC105226345(CHIA);LOC105226562(chs-2);LOC105227416(cyb5r2);LOC105228097(Pgi);LOC105230995(Nagk);LOC105231918(GFPT2);LOC105232357(Cht10);LOC105232601(CG1969);LOC105233016(CMAS);LOC105233418(sgl);LOC105233954(Uap1);LOC109579331(--)	K00965+K01183+K17497+K01183+K00698+K00326+K01810+K00884+K00820+K01183+K00621+K21749+K00012+K00972+K01183
												Metabolism	Amino acid metabolism	Alanine, aspartate and glutamate metabolism	9	24	0.0209793	0.168227	ko00250	LOC105222716(Prat);LOC105222926(Gdh);LOC105224138(Gs2);LOC105224253(ALDH4A1);LOC105224406(GOT2);LOC105224871(Gad1);LOC105225623(Prat);LOC105226480(Got1);LOC105231918(GFPT2)	K00764+K00261+K01915+K00294+K14455+K01580+K00764+K14454+K00820
												Metabolism	Glycan biosynthesis and metabolism	Mannose type O-glycan biosyntheis	3	4	0.021164	0.168227	ko00515	LOC105225562(tw);LOC105227401(rt);LOC105228140(gnt14)	K00728+K00728+K21032
												Metabolism	Lipid metabolism	Steroid hormone biosynthesis	10	28	0.0218826	0.16959	ko00140	LOC105224237(hsd17b12a);LOC105224876(Ugt1a2);LOC105230262(UGT8);LOC105230268(Ugt1a1);LOC105230325(ugt3);LOC105230805(UGT2B13);LOC105231230(HSDL1);LOC105231237(UGT2B15);LOC105232212(--);LOC109579516(--)	K10251+K00699+K00699+K00699+K00699+K00699+K10251+K00699+K00699+K00699
												Metabolism	Lipid metabolism	Cutin, suberine and wax biosynthesis	5	10	0.0227815	0.17225	ko00073	LOC105222720(wat);LOC105225825(wat);LOC105225838(wat);LOC105226693(far1);LOC105230858(far1)	K13356+K13356+K13356+K13356+K13356
												Cellular Processes	Transport and catabolism	Peroxisome	21	77	0.0327975	0.238341	ko04146	LOC105222720(wat);LOC105223311(AAO2);LOC105223314(AAO2);LOC105223876(SCP2);LOC105224676(Hacl1);LOC105224810(Idh1);LOC105225825(wat);LOC105225838(wat);LOC105226010(GNPAT);LOC105226309(daao-1);LOC105226631(--);LOC105226693(far1);LOC105228282(Mfe2);LOC105229168(CG5009);LOC105229169(CG5009);LOC105229424(mpv17l);LOC105230729(CG5009);LOC105230858(far1);LOC105233107(MPV17L);LOC105233108(--);LOC105233109…	K13356+K00106+K00106+K08764+K12261+K00031+K13356+K13356+K00649+K00273+K13349+K13356+K12405+K00232+K00232+K13349+K00232+K13356+K13348+K13348+K13348
												Human Diseases	Cardiovascular diseases	Viral myocarditis	7	18	0.0330602	0.238341	ko05416	LOC105225453(Act57B);LOC105226058(RhoL);LOC105228222(Act79B);LOC105229580(Act88F);LOC105229794(Mhc);LOC105229889(Act87E);LOC105233538(Cyt-c-p)	K05692+K04392+K05692+K05692+K17751+K05692+K08738
												Metabolism	Nucleotide metabolism	Purine metabolism	31	125	0.0403186	0.284063	ko00230	LOC105222518(ALN);LOC105222716(Prat);LOC105223075(Polr1c);LOC105223311(AAO2);LOC105223314(AAO2);LOC105223573(RpI135);LOC105224743(Polr3h);LOC105225576(Adcy9);LOC105225623(Prat);LOC105225795(Pde6);LOC105225953(POLR2H);LOC105226072(Nme7);LOC105226353(ada2);LOC105226526(RpI1);LOC105226786(--);LOC105227488(SPCC285.04);LOC105227970(PNP);LOC105228611(ras);LOC105229025(Aprt);LOC105230125(--);LOC10523023…	K01466+K00764+K03027+K00106+K00106+K03002+K03022+K08049+K00764+K13763+K03016+K00940+K19572+K02999+K03005+K07127+K03783+K00088+K00759+K12323+K01769+K12323+K10808+K00962+K12318+K12319+K19572+K01587+K03004+K02321+K12323
												Human Diseases	Immune diseases	Systemic lupus erythematosus	4	8	0.041996	0.287525	ko05322	LOC105221965(SmD3);LOC105225618(Actn);LOC105233100(Grin2b);LOC109580066(--)	K11088+K05699+K05210+K05210
												Metabolism	Glycan biosynthesis and metabolism	N-Glycan biosynthesis	11	35	0.042665	0.287525	ko00510	LOC105223348(STT3B);LOC105224598(Stt3b);LOC105225030(--);LOC105226794(Alg13);LOC105228793(Ganab);LOC105229271(wol);LOC105229896(--);LOC105230239(st6gal2);LOC105232327(CG10166);LOC105233977(alg11);LOC109579495(l(2)k12914)	K07151+K07151+K09658+K07432+K05546+K00729+K09659+K00778+K00721+K03844+K12668
												Metabolism	Carbohydrate metabolism	Ascorbate and aldarate metabolism	10	32	0.0539935	0.355239	ko00053	LOC105224512(Aldh1b1);LOC105224876(Ugt1a2);LOC105230262(UGT8);LOC105230268(Ugt1a1);LOC105230325(ugt3);LOC105230805(UGT2B13);LOC105231237(UGT2B15);LOC105232212(--);LOC105233418(sgl);LOC109579516(--)	K00128+K00699+K00699+K00699+K00699+K00699+K00699+K00699+K00012+K00699
												Metabolism	Lipid metabolism	Fatty acid elongation	6	16	0.0564674	0.355239	ko00062	LOC105223612(TECR);LOC105224237(hsd17b12a);LOC105224915(Ppt1);LOC105225208(eloF);LOC105226450(eloF);LOC105231230(HSDL1)	K10258+K10251+K01074+K10249+K10249+K10251
												Metabolism	Glycan biosynthesis and metabolism	Other glycan degradation	7	20	0.0578022	0.355239	ko00511	LOC105225659(GLB1);LOC105226747(GBA);LOC105229172(fdl);LOC105230050(BRAFLDRAFT_56888);LOC105230294(Man2a2);LOC105231812(MANBA);LOC105232311(MAN2B1)	K12309+K01201+K20730+K01206+K01191+K01192+K12311
												Metabolism	Glycan biosynthesis and metabolism	Mucin type O-glycan biosynthesis	7	20	0.0578022	0.355239	ko00512	LOC105225146(pgant6);LOC105225671(C1GalTA);LOC105225673(C1GalTA);LOC105225674(C1GalTA);LOC105226711(gly-5);LOC105229056(C1GalTA);LOC105229249(pgant2)	K00710+K00731+K00731+K00731+K00710+K00731+K00710
												Organismal Systems	Nervous system	Glutamatergic synapse	12	41	0.0584425	0.355239	ko04724	LOC105222157(HOMER2);LOC105222892(Galphaq);LOC105222909(Gnaq);LOC105224138(Gs2);LOC105225576(Adcy9);LOC105226733(Pkc53E);LOC105226958(CanA-14F);LOC105232029(Gnb5);LOC105232251(Ggamma30A);LOC105233100(Grin2b);LOC109579326(Gnaq);LOC109580066(--)	K15010+K04634+K04634+K01915+K08049+K02677+K04348+K04539+K04547+K05210+K04634+K05210
												Organismal Systems	Endocrine system	Oxytocin signaling pathway	17	65	0.0729667	0.434994	ko04921	LOC105222837(Egfr);LOC105222892(Galphaq);LOC105222909(Gnaq);LOC105225453(Act57B);LOC105225576(Adcy9);LOC105226733(Pkc53E);LOC105226958(CanA-14F);LOC105228222(Act79B);LOC105229580(Act88F);LOC105229889(Act87E);LOC105230125(--);LOC105230478(Npr1);LOC105231043(Gycalpha99B);LOC105231331(CACNA2D3);LOC105232516(GUCY1B1);LOC109579326(Gnaq);MSTRG.8496(--)	K04361+K04634+K04634+K05692+K08049+K02677+K04348+K05692+K05692+K05692+K12323+K12323+K12318+K04860+K12319+K04634+K12323
												Environmental Information Processing	Signal transduction	cGMP - PKG signaling pathway	16	61	0.0786267	0.452334	ko04022	LOC105222892(Galphaq);LOC105222909(Gnaq);LOC105224975(sesB);LOC105225576(Adcy9);LOC105226958(CanA-14F);LOC105229794(Mhc);LOC105229913(Slc8a1);LOC105230125(--);LOC105230478(Npr1);LOC105231043(Gycalpha99B);LOC105231615(pnr);LOC105232516(GUCY1B1);LOC105232922(SLC8A1);LOC105232923(Slc8a3);LOC109579326(Gnaq);MSTRG.8496(--)	K04634+K04634+K05863+K08049+K04348+K17751+K05849+K12323+K12323+K12318+K09183+K12319+K05849+K05849+K04634+K12323
												Metabolism	Lipid metabolism	Linoleic acid metabolism	3	6	0.0792249	0.452334	ko00591	LOC105224532(PLA2);LOC105227365(PLA2G12B);LOC105232554(--)	K01047+K01047+K01047
												Organismal Systems	Environmental adaptation	Circadian entrainment	12	43	0.0802528	0.452334	ko04713	LOC105222892(Galphaq);LOC105222909(Gnaq);LOC105225576(Adcy9);LOC105226733(Pkc53E);LOC105230055(CG42673);LOC105231043(Gycalpha99B);LOC105232029(Gnb5);LOC105232251(Ggamma30A);LOC105232516(GUCY1B1);LOC105233100(Grin2b);LOC109579326(Gnaq);LOC109580066(--)	K04634+K04634+K08049+K02677+K16513+K12318+K04539+K04547+K12319+K05210+K04634+K05210
												Metabolism	Amino acid metabolism	Glycine, serine and threonine metabolism	8	26	0.0873353	0.472282	ko00260	LOC105222766(Shmt1);LOC105224361(CBSL);LOC105224599(Gldc);LOC105226309(daao-1);LOC105226796(THA2);LOC105228244(GNMT);LOC105228945(Sardh);LOC105229638(Gld)	K00600+K01697+K00281+K00273+K01620+K00552+K00314+K00108
												Metabolism	Lipid metabolism	Primary bile acid biosynthesis	2	3	0.0883624	0.472282	ko00120	LOC105223876(SCP2);LOC105228282(Mfe2)	K08764+K12405
												Organismal Systems	Immune system	Complement and coagulation cascades	2	3	0.0883624	0.472282	ko04610	LOC105227172(SSPO);LOC105229510(F11)	K03900+K01323
												Cellular Processes	Transport and catabolism	Lysosome	25	105	0.0916383	0.481489	ko04142	LOC105222132(SGSH);LOC105223015(Npc1b);LOC105223150(CG17119);LOC105224017(Arsb);LOC105224023(CLN3);LOC105224057(CD63);LOC105224194(Lip1);LOC105224212(Lip1);LOC105224915(Ppt1);LOC105225646(NAGLU);LOC105225659(GLB1);LOC105226747(GBA);LOC105226761(--);LOC105226824(Cp1);LOC105227741(NAGA);LOC105227766(Cd53);LOC105227818(ATP6V0A1);LOC105227880(mfsd8);LOC105228814(HGSNAT);LOC105230050(BRAFLDRAFT_56888)…	K01565+K12385+K12386+K01135+K12389+K06497+K01052+K01052+K01074+K01205+K12309+K01201+K13443+K01365+K01189+K06497+K02154+K12307+K10532+K01206+K02154+K01192+K12311+K01365+K12382
												Metabolism	Carbohydrate metabolism	Pentose and glucuronate interconversions	13	49	0.0986962	0.508145	ko00040	LOC105224588(AKR1A1);LOC105224876(Ugt1a2);LOC105224947(Cryl1);LOC105225587(XYLB);LOC105228312(DCXR);LOC105230262(UGT8);LOC105230268(Ugt1a1);LOC105230325(ugt3);LOC105230805(UGT2B13);LOC105231237(UGT2B15);LOC105232212(--);LOC105233418(sgl);LOC109579516(--)	K00002+K00699+K13247+K00854+K03331+K00699+K00699+K00699+K00699+K00699+K00699+K00012+K00699
												Metabolism	Amino acid metabolism	Lysine degradation	11	40	0.0999898	0.508145	ko00310	LOC105222381(TMLHE);LOC105223352(trx);LOC105224512(Aldh1b1);LOC105224723(GA16561);LOC105226084(Su(var)3-9);LOC105228811(Bbox1);LOC105229197(AASS);LOC105229910(PR-Set7);LOC105232216(SETD3);LOC105232621(ACAT2);MSTRG.9464(--)	K00474+K09186+K00128+K11703+K11419+K00471+K14157+K11428+K19199+K00626+K00471
												Organismal Systems	Immune system	Platelet activation	12	45	0.106601	0.533003	ko04611	LOC105221964(olf186-F);LOC105222892(Galphaq);LOC105222909(Gnaq);LOC105225453(Act57B);LOC105225576(Adcy9);LOC105227172(SSPO);LOC105228222(Act79B);LOC105229580(Act88F);LOC105229889(Act87E);LOC105231043(Gycalpha99B);LOC105232516(GUCY1B1);LOC109579326(Gnaq)	K16056+K04634+K04634+K05692+K08049+K03900+K05692+K05692+K05692+K12318+K12319+K04634
												Metabolism	Glycan biosynthesis and metabolism	Glycosaminoglycan degradation	5	15	0.123394	0.607177	ko00531	LOC105222132(SGSH);LOC105224017(Arsb);LOC105225646(NAGLU);LOC105225659(GLB1);LOC105228814(HGSNAT)	K01565+K01135+K01205+K12309+K10532
												Organismal Systems	Digestive system	Bile secretion	12	47	0.137473	0.665885	ko04976	LOC105223845(Abcb1a);LOC105224876(Ugt1a2);LOC105225576(Adcy9);LOC105230262(UGT8);LOC105230268(Ugt1a1);LOC105230325(ugt3);LOC105230805(UGT2B13);LOC105231156(SLC9A3);LOC105231237(UGT2B15);LOC105231580(l(2)03659);LOC105232212(--);LOC109579516(--)	K05658+K00699+K08049+K00699+K00699+K00699+K00699+K12040+K00699+K05673+K00699+K00699
												Metabolism	Amino acid metabolism	Phenylalanine, tyrosine and tryptophan biosynthesis	2	4	0.155561	0.732882	ko00400	LOC105224406(GOT2);LOC105226480(Got1)	K14455+K14454
												Metabolism	Nucleotide metabolism	Pyrimidine metabolism	18	77	0.156033	0.732882	ko00240	LOC105223075(Polr1c);LOC105223573(RpI135);LOC105223978(--);LOC105223979(CTPsyn);LOC105224743(Polr3h);LOC105225953(POLR2H);LOC105226045(UPP1);LOC105226072(Nme7);LOC105226526(RpI1);LOC105226786(--);LOC105227970(PNP);LOC105230669(RnrS);LOC105231012(PNPT1);LOC105231050(UPP1);LOC105231525(r-l);LOC105233253(Upp1);LOC105233593(--);LOC105233911(DNApol-alpha73)	K03027+K03002+K01937+K01937+K03022+K03016+K00757+K00940+K02999+K03005+K03783+K10808+K00962+K00757+K13421+K00757+K03004+K02321
												Organismal Systems	Digestive system	Mineral absorption	7	25	0.15864	0.734005	ko04978	LOC105221974(slc46a1);LOC105221977(slc46a1);LOC105229913(Slc8a1);LOC105231062(--);LOC105231156(SLC9A3);LOC105232922(SLC8A1);LOC105232923(Slc8a3)	K14613+K14613+K05849+K14686+K12040+K05849+K05849
												Metabolism	Lipid metabolism	Steroid biosynthesis	3	8	0.16724	0.76242	ko00100	LOC105223844(Soat1);LOC105224194(Lip1);LOC105224212(Lip1)	K00637+K01052+K01052
												Organismal Systems	Excretory system	Endocrine and other factor-regulated calcium reabsorption	9	35	0.177388	0.762637	ko04961	LOC105222892(Galphaq);LOC105222909(Gnaq);LOC105224296(Trpv5);LOC105225576(Adcy9);LOC105226733(Pkc53E);LOC105229913(Slc8a1);LOC105232922(SLC8A1);LOC105232923(Slc8a3);LOC109579326(Gnaq)	K04634+K04634+K04974+K08049+K02677+K05849+K05849+K05849+K04634
												Metabolism	Metabolism of other amino acids	D-Arginine and D-ornithine metabolism	1	1	0.183267	0.762637	ko00472	LOC105226309(daao-1)	K00273
												Organismal Systems	Nervous system	GABAergic synapse	10	40	0.183492	0.762637	ko04727	LOC105221829(Gabbr1);LOC105224042(Grd);LOC105224138(Gs2);LOC105224871(Gad1);LOC105225576(Adcy9);LOC105226733(Pkc53E);LOC105228157(SLC12A6);LOC105232029(Gnb5);LOC105232251(Ggamma30A);LOC115065809(Gabbr1)	K04615+K05175+K01915+K01580+K08049+K02677+K14427+K04539+K04547+K04615
												Cellular Processes	Cellular community - eukaryotes	Focal adhesion	17	74	0.184064	0.762637	ko04510	LOC105222522(--);LOC105222583(thbs3a);LOC105222837(Egfr);LOC105223909(Col4a1);LOC105223911(COL4A1);LOC105225453(Act57B);LOC105225577(Pdk1);LOC105225618(Actn);LOC105226058(RhoL);LOC105226733(Pkc53E);LOC105227172(SSPO);LOC105228222(Act79B);LOC105229580(Act88F);LOC105229889(Act87E);LOC105230174(Col1a2);LOC105232696(LanA);LOC105234174(Flnc)	K08131+K04659+K04361+K06237+K06237+K05692+K06276+K05699+K04392+K02677+K03900+K05692+K05692+K05692+K19719+K06240+K04437
												Metabolism	Lipid metabolism	Sphingolipid metabolism	7	26	0.18491	0.762637	ko00600	LOC105225659(GLB1);LOC105226747(GBA);LOC105227741(NAGA);LOC105227846(PLPP1);LOC105227847(PLPP3);LOC105227848(PLPP1);LOC105231761(CDase)	K12309+K01201+K01189+K01080+K01080+K01080+K12349
												Organismal Systems	Sensory system	Taste transduction	5	17	0.186969	0.762637	ko04742	LOC105221829(Gabbr1);LOC105224042(Grd);LOC105230555(5-HT1A);LOC105232251(Ggamma30A);LOC115065809(Gabbr1)	K04615+K05175+K04153+K04547+K04615
												Organismal Systems	Digestive system	Vitamin digestion and absorption	5	17	0.186969	0.762637	ko04977	LOC105221974(slc46a1);LOC105221977(slc46a1);LOC105225580(Cubn);LOC105226014(SLC19A2);LOC105232645(vanin-like)	K14613+K14613+K14616+K14610+K01435
												Organismal Systems	Digestive system	Cholesterol metabolism	5	17	0.186969	0.762637	ko04979	LOC105223015(Npc1b);LOC105223844(Soat1);LOC105224194(Lip1);LOC105224212(Lip1);LOC105226761(--)	K12385+K00637+K01052+K01052+K13443
												Cellular Processes	Cellular community - eukaryotes	Adherens junction	10	41	0.205514	0.827393	ko04520	LOC105222837(Egfr);LOC105224558(TGFBR1);LOC105225453(Act57B);LOC105225618(Actn);LOC105226058(RhoL);LOC105226349(stp1);LOC105228222(Act79B);LOC105229580(Act88F);LOC105229619(LIMCH1);LOC105229889(Act87E)	K04361+K04674+K05692+K05699+K04392+K14394+K05692+K05692+K06084+K05692
												Human Diseases	Endocrine and metabolic diseases	Cushing syndrome	14	61	0.215018	0.840795	ko04934	LOC105221964(olf186-F);LOC105222837(Egfr);LOC105222892(Galphaq);LOC105222909(Gnaq);LOC105223352(trx);LOC105224044(fz);LOC105225576(Adcy9);LOC105226202(Wnt5);LOC105227627(Cdk2);LOC105227682(Wnt2);LOC105229170(crhr1);LOC105229360(Fh);LOC105232091(Axn);LOC109579326(Gnaq)	K16056+K04361+K04634+K04634+K09186+K02432+K08049+K00444+K02206+K00572+K04578+K01679+K02157+K04634
												Metabolism	Metabolism of other amino acids	Taurine and hypotaurine metabolism	3	9	0.218416	0.840795	ko00430	LOC105224871(Gad1);LOC105228941(cdo1);LOC105229437(Csad)	K01580+K00456+K01594
												Human Diseases	Substance dependence	Nicotine addiction	3	9	0.218416	0.840795	ko05033	LOC105224042(Grd);LOC105233100(Grin2b);LOC109580066(--)	K05175+K05210+K05210
												Metabolism	Metabolism of terpenoids and polyketides	Terpenoid backbone biosynthesis	8	32	0.220005	0.840795	ko00900	LOC105223819(SDR-1);LOC105223822(SDR-1);LOC105223827(SDR-1);LOC105227882(SDR-1);LOC105227938(SDR-1);LOC105230724(FDPS);LOC105232621(ACAT2);LOC105232728(PDSS2)	K15890+K15890+K15890+K15890+K15890+K00787+K00626+K12505
												Organismal Systems	Immune system	Antigen processing and presentation	5	18	0.222404	0.840795	ko04612	LOC105224006(Hsc70-1);LOC105226434(Hsp83);LOC105226824(Cp1);LOC105231830(Hsc70-2);LOC105232835(Ctla2a)	K03283+K04079+K01365+K03283+K01365
												Human Diseases	Cancers	Gastric cancer	10	42	0.22858	0.844282	ko05226	LOC105222837(Egfr);LOC105223845(Abcb1a);LOC105223991(btl);LOC105224044(fz);LOC105224558(TGFBR1);LOC105225090(Lrp6);LOC105226202(Wnt5);LOC105227627(Cdk2);LOC105227682(Wnt2);LOC105232091(Axn)	K04361+K05658+K05093+K02432+K04674+K03068+K00444+K02206+K00572+K02157
												Metabolism	Metabolism of other amino acids	Phosphonate and phosphinate metabolism	2	5	0.228773	0.844282	ko00440	LOC105225068(chpt1);LOC105233389(SELENOI)	K00993+K00993
												Genetic Information Processing	Transcription	RNA polymerase	7	28	0.242163	0.85154	ko03020	LOC105223075(Polr1c);LOC105223573(RpI135);LOC105224743(Polr3h);LOC105225953(POLR2H);LOC105226526(RpI1);LOC105226786(--);LOC105233593(--)	K03027+K03002+K03022+K03016+K02999+K03005+K03004
												Human Diseases	Neurodegenerative diseases	Amyotrophic lateral sclerosis (ALS)	7	28	0.242163	0.85154	ko05014	LOC105224409(Der-1);LOC105225557(Tom40);LOC105226058(RhoL);LOC105226958(CanA-14F);LOC105233100(Grin2b);LOC105233538(Cyt-c-p);LOC109580066(--)	K11519+K11518+K04392+K04348+K05210+K08738+K05210
												Metabolism	Lipid metabolism	Arachidonic acid metabolism	4	14	0.245379	0.85154	ko00590	LOC105224532(PLA2);LOC105227365(PLA2G12B);LOC105228691(GstS1);LOC105232554(--)	K01047+K01047+K04097+K01047
												Human Diseases	Cancers	Proteoglycans in cancer	21	98	0.245843	0.85154	ko05205	LOC105222537(Ddx17);LOC105222837(Egfr);LOC105223918(smo);LOC105224044(fz);LOC105224057(CD63);LOC105225453(Act57B);LOC105225577(Pdk1);LOC105226058(RhoL);LOC105226202(Wnt5);LOC105226733(Pkc53E);LOC105226824(Cp1);LOC105227682(Wnt2);LOC105227766(Cd53);LOC105228222(Act79B);LOC105229580(Act88F);LOC105229889(Act87E);LOC105231797(sima);LOC105232048(csw);LOC105232835(Ctla2a);LOC105234174(Flnc);LOC10957990…	K12823+K04361+K06226+K02432+K06497+K05692+K06276+K04392+K00444+K02677+K01365+K00572+K06497+K05692+K05692+K05692+K08268+K07293+K01365+K04437+K10380
												Metabolism	Amino acid metabolism	Cysteine and methionine metabolism	8	33	0.247221	0.85154	ko00270	LOC105223108(HMT-1);LOC105224130(Ahcy13);LOC105224361(CBSL);LOC105224406(GOT2);LOC105225053(AHCYL2);LOC105226480(Got1);LOC105228941(cdo1);LOC105231405(ImpL3)	K00547+K01251+K01697+K14455+K01251+K14454+K00456+K00016
												Metabolism	Amino acid metabolism	Valine, leucine and isoleucine degradation	8	33	0.247221	0.85154	ko00280	LOC105223344(Mccc1);LOC105224512(Aldh1b1);LOC105227875(ACADSB);LOC105229559(Bckdha);LOC105229963(l(2)04524);LOC105230446(Acads);LOC105231281(CG12262);LOC105232621(ACAT2)	K01968+K00128+K09478+K00166+K01969+K00248+K00249+K00626
												Human Diseases	Infectious diseases	Pathogenic Escherichia coli infection	9	38	0.250513	0.853397	ko05130	LOC105225453(Act57B);LOC105226733(Pkc53E);LOC105226868(betaTub56D);LOC105227022(mod);LOC105228222(Act79B);LOC105229580(Act88F);LOC105229889(Act87E);LOC105232619(alphaTub67C);LOC105232633(--)	K05692+K02677+K07375+K11294+K05692+K05692+K05692+K07374+K11294
												Metabolism	Amino acid metabolism	Tryptophan metabolism	5	19	0.259637	0.865457	ko00380	LOC105221826(KFase);LOC105224512(Aldh1b1);LOC105225353(AANAT1);LOC105228982(cn);LOC105232621(ACAT2)	K01432+K00128+K00669+K00486+K00626
												Cellular Processes	Cell growth and death	Apoptosis - multiple species	5	19	0.259637	0.865457	ko04215	LOC105224480(Dronc);LOC105225811(CASP7);LOC105227461(Sept4);LOC105229787(HtrA2);LOC105233538(Cyt-c-p)	K20009+K04397+K16943+K08669+K08738
												Metabolism	Lipid metabolism	Fatty acid biosynthesis	3	10	0.272181	0.886493	ko00061	LOC105232303(bgm);LOC105232304(CG4500);LOC105232306(CG4500)	K15013+K15013+K15013
												Organismal Systems	Circulatory system	Vascular smooth muscle contraction	13	59	0.275625	0.886493	ko04270	LOC105222892(Galphaq);LOC105222909(Gnaq);LOC105224532(PLA2);LOC105225576(Adcy9);LOC105226733(Pkc53E);LOC105227365(PLA2G12B);LOC105230125(--);LOC105230478(Npr1);LOC105231043(Gycalpha99B);LOC105232516(GUCY1B1);LOC105232554(--);LOC109579326(Gnaq);MSTRG.8496(--)	K04634+K04634+K01047+K08049+K02677+K01047+K12323+K12323+K12318+K12319+K01047+K04634+K12323
												Cellular Processes	Cell growth and death	Apoptosis - fly	11	49	0.277236	0.886493	ko04214	LOC105222837(Egfr);LOC105224480(Dronc);LOC105225038(PRDX4);LOC105225270(Eip74EF);LOC105225811(CASP7);LOC105226312(EcR);LOC105226319(--);LOC105226331(Mblk-1);LOC105229787(HtrA2);LOC105232870(Btf3l4);LOC105233538(Cyt-c-p)	K04361+K20009+K03386+K09428+K04397+K14034+K20010+K20015+K08669+K01527+K08738
												Organismal Systems	Endocrine system	Aldosterone synthesis and secretion	10	44	0.277386	0.886493	ko04925	LOC105221964(olf186-F);LOC105222892(Galphaq);LOC105222909(Gnaq);LOC105225576(Adcy9);LOC105226733(Pkc53E);LOC105228248(Dagla);LOC105230125(--);LOC105230478(Npr1);LOC109579326(Gnaq);MSTRG.8496(--)	K16056+K04634+K04634+K08049+K02677+K13806+K12323+K12323+K04634+K12323
												Metabolism	Amino acid metabolism	Arginine biosynthesis	4	15	0.289738	0.889044	ko00220	LOC105222926(Gdh);LOC105224138(Gs2);LOC105224406(GOT2);LOC105226480(Got1)	K00261+K01915+K14455+K14454
												Metabolism	Carbohydrate metabolism	Propanoate metabolism	5	20	0.298178	0.889044	ko00640	LOC105227980(AcCoAS);LOC105229559(Bckdha);LOC105231281(CG12262);LOC105231405(ImpL3);LOC105232621(ACAT2)	K01895+K00166+K00249+K00016+K00626
												Organismal Systems	Endocrine system	Cortisol synthesis and secretion	5	20	0.298178	0.889044	ko04927	LOC105221964(olf186-F);LOC105222892(Galphaq);LOC105222909(Gnaq);LOC105225576(Adcy9);LOC109579326(Gnaq)	K16056+K04634+K04634+K08049+K04634
												Human Diseases	Cancers	Choline metabolism in cancer	12	55	0.299519	0.889044	ko05231	LOC105222837(Egfr);LOC105224472(CG1311);LOC105225577(Pdk1);LOC105226058(RhoL);LOC105226287(Orct);LOC105226733(Pkc53E);LOC105227846(PLPP1);LOC105227847(PLPP3);LOC105227848(PLPP1);LOC105230334(CG34384);LOC105231741(Orct2);LOC105231797(sima)	K04361+K06515+K06276+K04392+K08202+K02677+K01080+K01080+K01080+K00901+K08202+K08268
												Organismal Systems	Nervous system	Cholinergic synapse	10	45	0.302877	0.889044	ko04725	LOC105222892(Galphaq);LOC105222909(Gnaq);LOC105225576(Adcy9);LOC105226733(Pkc53E);LOC105229487(KCNQ5);LOC105229768(ACHE1);LOC105232029(Gnb5);LOC105232251(Ggamma30A);LOC109579326(Gnaq);LOC115066409(--)	K04634+K04634+K08049+K02677+K04930+K01049+K04539+K04547+K04634+K04930
												Metabolism	Biosynthesis of other secondary metabolites	Caffeine metabolism	2	6	0.303547	0.889044	ko00232	LOC105223311(AAO2);LOC105223314(AAO2)	K00106+K00106
												Metabolism	Amino acid metabolism	Phenylalanine metabolism	2	6	0.303547	0.889044	ko00360	LOC105224406(GOT2);LOC105226480(Got1)	K14455+K14454
												Metabolism	Metabolism of cofactors and vitamins	Vitamin B6 metabolism	2	6	0.303547	0.889044	ko00750	LOC105230296(PNPO);LOC105230407(phospho2)	K00275+K13248
												Organismal Systems	Digestive system	Gastric acid secretion	9	40	0.303996	0.889044	ko04971	LOC105222892(Galphaq);LOC105222909(Gnaq);LOC105225453(Act57B);LOC105225576(Adcy9);LOC105226733(Pkc53E);LOC105228222(Act79B);LOC105229580(Act88F);LOC105229889(Act87E);LOC109579326(Gnaq)	K04634+K04634+K05692+K08049+K02677+K05692+K05692+K05692+K04634
												Metabolism	Metabolism of other amino acids	D-Glutamine and D-glutamate metabolism	1	2	0.332993	0.926008	ko00471	LOC105222926(Gdh)	K00261
												Human Diseases	Immune diseases	Primary immunodeficiency	1	2	0.332993	0.926008	ko05340	LOC105221964(olf186-F)	K16056
												Organismal Systems	Immune system	Leukocyte transendothelial migration	8	36	0.334194	0.926008	ko04670	LOC105225453(Act57B);LOC105225618(Actn);LOC105226058(RhoL);LOC105226733(Pkc53E);LOC105228222(Act79B);LOC105229580(Act88F);LOC105229889(Act87E);LOC105232048(csw)	K05692+K05699+K04392+K02677+K05692+K05692+K05692+K07293
												Human Diseases	Infectious diseases	Amoebiasis	8	36	0.334194	0.926008	ko05146	LOC105222892(Galphaq);LOC105222909(Gnaq);LOC105223909(Col4a1);LOC105223911(COL4A1);LOC105225618(Actn);LOC105226733(Pkc53E);LOC105232696(LanA);LOC109579326(Gnaq)	K04634+K04634+K06237+K06237+K05699+K02677+K06240+K04634
												Metabolism	Energy metabolism	Nitrogen metabolism	4	16	0.335045	0.926008	ko00910	LOC105222926(Gdh);LOC105224138(Gs2);LOC105231566(bca-1);LOC105234179(Ca2)	K00261+K01915+K01673+K01672
												Organismal Systems	Sensory system	Olfactory transduction	4	16	0.335045	0.926008	ko04740	LOC105229913(Slc8a1);LOC105232251(Ggamma30A);LOC105232922(SLC8A1);LOC105232923(Slc8a3)	K05849+K04547+K05849+K05849
												Human Diseases	Cancers	Basal cell carcinoma	5	21	0.337545	0.926008	ko05217	LOC105223918(smo);LOC105224044(fz);LOC105226202(Wnt5);LOC105227682(Wnt2);LOC105232091(Axn)	K06226+K02432+K00444+K00572+K02157
												Organismal Systems	Endocrine system	Parathyroid hormone synthesis, secretion and action	9	42	0.359816	0.932277	ko04928	LOC105222837(Egfr);LOC105222892(Galphaq);LOC105222909(Gnaq);LOC105224296(Trpv5);LOC105225090(Lrp6);LOC105225576(Adcy9);LOC105226733(Pkc53E);LOC105228866(Mmp3);LOC109579326(Gnaq)	K04361+K04634+K04634+K04974+K03068+K08049+K02677+K08002+K04634
												Environmental Information Processing	Signal transduction	Rap1 signaling pathway	14	68	0.360521	0.932277	ko04015	LOC105222837(Egfr);LOC105222892(Galphaq);LOC105222909(Gnaq);LOC105223991(btl);LOC105225453(Act57B);LOC105225576(Adcy9);LOC105226058(RhoL);LOC105226733(Pkc53E);LOC105228222(Act79B);LOC105229580(Act88F);LOC105229889(Act87E);LOC105233100(Grin2b);LOC109579326(Gnaq);LOC109580066(--)	K04361+K04634+K04634+K05093+K05692+K08049+K04392+K02677+K05692+K05692+K05692+K05210+K04634+K05210
												Metabolism	Carbohydrate metabolism	Glyoxylate and dicarboxylate metabolism	7	32	0.368795	0.932277	ko00630	LOC105221826(KFase);LOC105222766(Shmt1);LOC105224026(PGP);LOC105224138(Gs2);LOC105224599(Gldc);LOC105227980(AcCoAS);LOC105232621(ACAT2)	K01432+K00600+K19269+K01915+K00281+K01895+K00626
												Cellular Processes	Cell growth and death	Apoptosis	12	58	0.37084	0.932277	ko04210	LOC105225453(Act57B);LOC105225577(Pdk1);LOC105225811(CASP7);LOC105226824(Cp1);LOC105227461(Sept4);LOC105228222(Act79B);LOC105229580(Act88F);LOC105229787(HtrA2);LOC105229889(Act87E);LOC105232619(alphaTub67C);LOC105232835(Ctla2a);LOC105233538(Cyt-c-p)	K05692+K06276+K04397+K01365+K16943+K05692+K05692+K08669+K05692+K07374+K01365+K08738
												Organismal Systems	Circulatory system	Adrenergic signaling in cardiomyocytes	12	58	0.37084	0.932277	ko04261	LOC105222892(Galphaq);LOC105222909(Gnaq);LOC105225576(Adcy9);LOC105226581(Tm2);LOC105226582(Tm1);LOC105226733(Pkc53E);LOC105229794(Mhc);LOC105229913(Slc8a1);LOC105231331(CACNA2D3);LOC105232922(SLC8A1);LOC105232923(Slc8a3);LOC109579326(Gnaq)	K04634+K04634+K08049+K10374+K10373+K02677+K17751+K05849+K04860+K05849+K05849+K04634
												Organismal Systems	Endocrine system	Estrogen signaling pathway	11	53	0.376343	0.932277	ko04915	LOC105221829(Gabbr1);LOC105222837(Egfr);LOC105222892(Galphaq);LOC105222909(Gnaq);LOC105224006(Hsc70-1);LOC105225576(Adcy9);LOC105226434(Hsp83);LOC105231830(Hsc70-2);LOC105232524(HSP90B1);LOC109579326(Gnaq);LOC115065809(Gabbr1)	K04615+K04361+K04634+K04634+K03283+K08049+K04079+K03283+K09487+K04634+K04615
												Human Diseases	Infectious diseases	Vibrio cholerae infection	11	53	0.376343	0.932277	ko05110	LOC105225453(Act57B);LOC105225576(Adcy9);LOC105225976(Slc12a2);LOC105226733(Pkc53E);LOC105227818(ATP6V0A1);LOC105228222(Act79B);LOC105229580(Act88F);LOC105229889(Act87E);LOC105231750(Atp6v0a1);LOC105232161(Vha13);LOC105234205(KdelR)	K05692+K08049+K10951+K02677+K02154+K05692+K05692+K05692+K02154+K02152+K10949
												Metabolism	Amino acid metabolism	Histidine metabolism	2	7	0.376857	0.932277	ko00340	LOC105224512(Aldh1b1);LOC105232128(CG11596)	K00128+K19787
												Metabolism	Glycan biosynthesis and metabolism	Glycosaminoglycan biosynthesis - chondroitin sulfate / dermatan sulfate	2	7	0.376857	0.932277	ko00532	LOC105222062(CHST11);LOC105226957(Chpf)	K01017+K00747
												Metabolism	Glycan biosynthesis and metabolism	Glycosphingolipid biosynthesis - ganglio series	2	7	0.376857	0.932277	ko00604	LOC105225659(GLB1);LOC105226456(Slc33a1)	K12309+K03372
												Genetic Information Processing	Folding, sorting and degradation	Protein export	5	22	0.37728	0.932277	ko03060	LOC105223697(Spase25);LOC105230011(Spase22-23);LOC105231873(Sec11a);LOC105232640(Spase12);LOC105233349(Gtp-bp)	K12947+K12948+K13280+K12946+K13431
												Cellular Processes	Cell growth and death	p53 signaling pathway	5	22	0.37728	0.932277	ko04115	LOC105223735(lok);LOC105227627(Cdk2);LOC105230669(RnrS);LOC105233538(Cyt-c-p);LOC105233949(Rchy1)	K06641+K02206+K10808+K08738+K10144
												Human Diseases	Infectious diseases	African trypanosomiasis	4	17	0.380607	0.932277	ko05143	LOC105222892(Galphaq);LOC105222909(Gnaq);LOC105226733(Pkc53E);LOC109579326(Gnaq)	K04634+K04634+K02677+K04634
												Metabolism	Carbohydrate metabolism	Butanoate metabolism	3	12	0.381933	0.932277	ko00650	LOC105224871(Gad1);LOC105230446(Acads);LOC105232621(ACAT2)	K01580+K00248+K00626
												Metabolism	Lipid metabolism	Glycerolipid metabolism	9	43	0.388202	0.940176	ko00561	LOC105224512(Aldh1b1);LOC105224588(AKR1A1);LOC105227741(NAGA);LOC105227846(PLPP1);LOC105227847(PLPP3);LOC105227848(PLPP1);LOC105228129(Gpat4);LOC105230334(CG34384);LOC105230785(DGAT1)	K00128+K00002+K01189+K01080+K01080+K01080+K13506+K00901+K11155
												Environmental Information Processing	Signal transduction	Apelin signaling pathway	10	49	0.40901	0.975331	ko04371	LOC105222892(Galphaq);LOC105222909(Gnaq);LOC105224558(TGFBR1);LOC105225576(Adcy9);LOC105229913(Slc8a1);LOC105232029(Gnb5);LOC105232251(Ggamma30A);LOC105232922(SLC8A1);LOC105232923(Slc8a3);LOC109579326(Gnaq)	K04634+K04634+K04674+K08049+K05849+K04539+K04547+K05849+K05849+K04634
												Cellular Processes	Cellular community - eukaryotes	Gap junction	10	49	0.40901	0.975331	ko04540	LOC105222837(Egfr);LOC105222892(Galphaq);LOC105222909(Gnaq);LOC105225576(Adcy9);LOC105226733(Pkc53E);LOC105226868(betaTub56D);LOC105231043(Gycalpha99B);LOC105232516(GUCY1B1);LOC105232619(alphaTub67C);LOC109579326(Gnaq)	K04361+K04634+K04634+K08049+K02677+K07375+K12318+K12319+K07374+K04634
												Metabolism	Metabolism of cofactors and vitamins	Porphyrin and chlorophyll metabolism	9	44	0.416697	0.986077	ko00860	LOC105224876(Ugt1a2);LOC105227538(Ppox);LOC105230262(UGT8);LOC105230268(Ugt1a1);LOC105230325(ugt3);LOC105230805(UGT2B13);LOC105231237(UGT2B15);LOC105232212(--);LOC109579516(--)	K00699+K00231+K00699+K00699+K00699+K00699+K00699+K00699+K00699
												Environmental Information Processing	Signal transduction	cAMP signaling pathway	15	76	0.420432	0.987377	ko04024	LOC105221829(Gabbr1);LOC105221964(olf186-F);LOC105225576(Adcy9);LOC105226058(RhoL);LOC105229168(CG5009);LOC105229169(CG5009);LOC105230125(--);LOC105230478(Npr1);LOC105230555(5-HT1A);LOC105230729(CG5009);LOC105231580(l(2)03659);LOC105233100(Grin2b);LOC109580066(--);LOC115065809(Gabbr1);MSTRG.8496(--)	K04615+K16056+K08049+K04392+K00232+K00232+K12323+K12323+K04153+K00232+K05673+K05210+K05210+K04615+K12323
												Metabolism	Metabolism of cofactors and vitamins	Pantothenate and CoA biosynthesis	3	13	0.435694	1	ko00770	LOC105227904(PANK1);LOC105232139(vanin-like);LOC105232140(vanin-like)	K09680+K08069+K08069
												Environmental Information Processing	Membrane transport	ABC transporters	3	13	0.435694	1	ko02010	LOC105223845(Abcb1a);LOC105230756(ABCG1);LOC105231580(l(2)03659)	K05658+K05679+K05673
												Organismal Systems	Excretory system	Proximal tubule bicarbonate reclamation	3	13	0.435694	1	ko04964	LOC105222926(Gdh);LOC105231156(SLC9A3);LOC105232191(Pepck)	K00261+K12040+K01596
												Human Diseases	Endocrine and metabolic diseases	Type I diabetes mellitus	2	8	0.446729	1	ko04940	LOC105224871(Gad1);LOC105233765(Ptprn2)	K01580+K07817
												Genetic Information Processing	Folding, sorting and degradation	Protein processing in endoplasmic reticulum	21	110	0.456221	1	ko04141	LOC105222202(hyou1);LOC105223120(DNAJA2);LOC105223348(STT3B);LOC105224006(Hsc70-1);LOC105224257(Ugt);LOC105224409(Der-1);LOC105224598(Stt3b);LOC105224693(wbl);LOC105224891(LMAN1);LOC105225131(Prkcsh);LOC105226434(Hsp83);LOC105228530(DNAJC3);LOC105228544(TRAM1);LOC105228716(CaBP1);LOC105228793(Ganab);LOC105228809(UBE2G2);LOC105231207(erlec1);LOC105231830(Hsc70-2);LOC105232524(HSP90B1);LOC105233982…	K09486+K09503+K07151+K03283+K11718+K11519+K07151+K09586+K10080+K08288+K04079+K09523+K14010+K09584+K05546+K04555+K14008+K03283+K09487+K10839+K12668
												Environmental Information Processing	Signal transduction	PI3K-Akt signaling pathway	18	94	0.459896	1	ko04151	LOC105222522(--);LOC105222583(thbs3a);LOC105222837(Egfr);LOC105223909(Col4a1);LOC105223911(COL4A1);LOC105223991(btl);LOC105225577(Pdk1);LOC105226058(RhoL);LOC105226434(Hsp83);LOC105226733(Pkc53E);LOC105227172(SSPO);LOC105227627(Cdk2);LOC105230174(Col1a2);LOC105232029(Gnb5);LOC105232191(Pepck);LOC105232251(Ggamma30A);LOC105232524(HSP90B1);LOC105232696(LanA)	K08131+K04659+K04361+K06237+K06237+K05093+K06276+K04392+K04079+K02677+K03900+K02206+K19719+K04539+K01596+K04547+K09487+K06240
												Metabolism	Carbohydrate metabolism	Glycolysis / Gluconeogenesis	10	51	0.462744	1	ko00010	LOC105222006(GALM);LOC105224512(Aldh1b1);LOC105224588(AKR1A1);LOC105224618(Pfk);LOC105227980(AcCoAS);LOC105228097(Pgi);LOC105231405(ImpL3);LOC105232191(Pepck);LOC105232983(Adh);LOC105232985(Adh)	K01785+K00128+K00002+K00850+K01895+K01810+K00016+K01596+K00001+K00001
												Organismal Systems	Nervous system	Long-term depression	7	35	0.466636	1	ko04730	LOC105222892(Galphaq);LOC105222909(Gnaq);LOC105226733(Pkc53E);LOC105229170(crhr1);LOC105231043(Gycalpha99B);LOC105232516(GUCY1B1);LOC109579326(Gnaq)	K04634+K04634+K02677+K04578+K12318+K12319+K04634
												Environmental Information Processing	Signal transduction	Hippo signaling pathway -fly	11	57	0.478399	1	ko04391	LOC105223481(HMCN1);LOC105223592(ds);LOC105225045(RERE);LOC105225453(Act57B);LOC105228222(Act79B);LOC105229262(ex);LOC105229580(Act88F);LOC105229889(Act87E);LOC105230393(MPP5);LOC105233721(vn);LOC115065999(dlg1)	K16680+K16507+K05628+K05692+K05692+K16683+K05692+K05692+K06091+K16690+K12076
												Human Diseases	Infectious diseases	Chagas disease (American trypanosomiasis)	8	41	0.485268	1	ko05142	LOC105222892(Galphaq);LOC105222909(Gnaq);LOC105224558(TGFBR1);LOC105229185(--);LOC105232276(Acer);LOC105232277(Ance);LOC105232878(ACE);LOC109579326(Gnaq)	K04634+K04634+K04674+K01283+K01283+K01283+K01283+K04634
												Environmental Information Processing	Signal transduction	Calcium signaling pathway	12	63	0.492521	1	ko04020	LOC105221964(olf186-F);LOC105222837(Egfr);LOC105222892(Galphaq);LOC105222909(Gnaq);LOC105224975(sesB);LOC105225576(Adcy9);LOC105226733(Pkc53E);LOC105226958(CanA-14F);LOC105229913(Slc8a1);LOC105232922(SLC8A1);LOC105232923(Slc8a3);LOC109579326(Gnaq)	K16056+K04361+K04634+K04634+K05863+K08049+K02677+K04348+K05849+K05849+K05849+K04634
												Organismal Systems	Endocrine system	Adipocytokine signaling pathway	5	25	0.494668	1	ko04920	LOC105232048(csw);LOC105232191(Pepck);LOC105232303(bgm);LOC105232304(CG4500);LOC105232306(CG4500)	K07293+K01596+K15013+K15013+K15013
												Organismal Systems	Circulatory system	Cardiac muscle contraction	7	36	0.498605	1	ko04260	LOC105226581(Tm2);LOC105226582(Tm1);LOC105229794(Mhc);LOC105229913(Slc8a1);LOC105231331(CACNA2D3);LOC105232922(SLC8A1);LOC105232923(Slc8a3)	K10374+K10373+K17751+K05849+K04860+K05849+K05849
												Environmental Information Processing	Signaling molecules and interaction	Cytokine-cytokine receptor interaction	2	9	0.511961	1	ko04060	LOC105224222(gbb);LOC105224558(TGFBR1)	K16621+K04674
												Metabolism	Carbohydrate metabolism	Pentose phosphate pathway	4	20	0.513105	1	ko00030	LOC105222689(Gld);LOC105224618(Pfk);LOC105228097(Pgi);LOC105230177(Rpia)	K00115+K00850+K01810+K01807
												Human Diseases	Drug resistance	Antifolate resistance	4	20	0.513105	1	ko01523	LOC105221974(slc46a1);LOC105221977(slc46a1);LOC105222766(Shmt1);LOC105231580(l(2)03659)	K14613+K14613+K00600+K05673
												Human Diseases	Infectious diseases	Legionellosis	6	31	0.513939	1	ko05134	LOC105224006(Hsc70-1);LOC105225811(CASP7);LOC105227188(--);LOC105230873(Ef1alpha100E);LOC105231830(Hsc70-2);LOC105233538(Cyt-c-p)	K03283+K04397+K15464+K03231+K03283+K08738
												Organismal Systems	Digestive system	Pancreatic secretion	15	81	0.528246	1	ko04972	LOC105222892(Galphaq);LOC105222909(Gnaq);LOC105224532(PLA2);LOC105224682(Amy-p);LOC105225162(thetaTry);LOC105225165(ami);LOC105225576(Adcy9);LOC105225976(Slc12a2);LOC105226058(RhoL);LOC105226733(Pkc53E);LOC105227365(PLA2G12B);LOC105228391(TRYP4);LOC105232554(--);LOC109579326(Gnaq);LOC109579825(thetaTry)	K04634+K04634+K01047+K01176+K01312+K01312+K08049+K10951+K04392+K02677+K01047+K01312+K01047+K04634+K01312
												Organismal Systems	Nervous system	Serotonergic synapse	8	43	0.543719	1	ko04726	LOC105222892(Galphaq);LOC105222909(Gnaq);LOC105223854(SerT);LOC105226733(Pkc53E);LOC105230555(5-HT1A);LOC105232029(Gnb5);LOC105232251(Ggamma30A);LOC109579326(Gnaq)	K04634+K04634+K05037+K02677+K04153+K04539+K04547+K04634
												Metabolism	Carbohydrate metabolism	Galactose metabolism	6	32	0.547434	1	ko00052	LOC105222006(GALM);LOC105222808(Galt);LOC105224618(Pfk);LOC105225659(GLB1);LOC105227741(NAGA);LOC105228045(Mal-A3)	K01785+K00965+K00850+K12309+K01189+K01187
												Metabolism	Metabolism of cofactors and vitamins	Biotin metabolism	1	4	0.555224	1	ko00780	LOC105232645(vanin-like)	K01435
												Human Diseases	Substance dependence	Morphine addiction	7	38	0.560491	1	ko05032	LOC105221829(Gabbr1);LOC105224042(Grd);LOC105225576(Adcy9);LOC105226733(Pkc53E);LOC105232029(Gnb5);LOC105232251(Ggamma30A);LOC115065809(Gabbr1)	K04615+K05175+K08049+K02677+K04539+K04547+K04615
												Metabolism	Metabolism of cofactors and vitamins	Ubiquinone and other terpenoid-quinone biosynthesis	2	10	0.571906	1	ko00130	LOC105230774(Coq6);LOC105231061(Coq2)	K06126+K06125
												Metabolism	Global and overview maps	2-Oxocarboxylic acid metabolism	3	16	0.583682	1	ko01210	LOC105224406(GOT2);LOC105224810(Idh1);LOC105226480(Got1)	K14455+K00031+K14454
												Metabolism	Global and overview maps	Carbon metabolism	17	95	0.586775	1	ko01200	LOC105222766(Shmt1);LOC105222926(Gdh);LOC105224026(PGP);LOC105224406(GOT2);LOC105224599(Gldc);LOC105224618(Pfk);LOC105224810(Idh1);LOC105226480(Got1);LOC105227980(AcCoAS);LOC105228097(Pgi);LOC105228335(SdhB);LOC105228673(SdhA);LOC105229360(Fh);LOC105230177(Rpia);LOC105230446(Acads);LOC105231281(CG12262);LOC105232621(ACAT2)	K00600+K00261+K19269+K14455+K00281+K00850+K00031+K14454+K01895+K01810+K00235+K00234+K01679+K01807+K00248+K00249+K00626
												Human Diseases	Cancers	Small cell lung cancer	5	28	0.602811	1	ko05222	LOC105223909(Col4a1);LOC105223911(COL4A1);LOC105227627(Cdk2);LOC105232696(LanA);LOC105233538(Cyt-c-p)	K06237+K06237+K02206+K06240+K08738
												Human Diseases	Cancers	Central carbon metabolism in cancer	6	34	0.611069	1	ko05230	LOC105222837(Egfr);LOC105223991(btl);LOC105224618(Pfk);LOC105224810(Idh1);LOC105231405(ImpL3);LOC105231797(sima)	K04361+K05093+K00850+K00031+K00016+K08268
												Metabolism	Global and overview maps	Biosynthesis of amino acids	10	57	0.615654	1	ko01230	LOC105222766(Shmt1);LOC105224138(Gs2);LOC105224260(Aldh18a1);LOC105224361(CBSL);LOC105224406(GOT2);LOC105224618(Pfk);LOC105224810(Idh1);LOC105226480(Got1);LOC105226796(THA2);LOC105230177(Rpia)	K00600+K01915+K12657+K01697+K14455+K00850+K00031+K14454+K01620+K01807
												Cellular Processes	Transport and catabolism	Phagosome	13	74	0.615748	1	ko04145	LOC105222583(thbs3a);LOC105225453(Act57B);LOC105226058(RhoL);LOC105226824(Cp1);LOC105226868(betaTub56D);LOC105227818(ATP6V0A1);LOC105228222(Act79B);LOC105229580(Act88F);LOC105229889(Act87E);LOC105231750(Atp6v0a1);LOC105232161(Vha13);LOC105232619(alphaTub67C);LOC105232835(Ctla2a)	K04659+K05692+K04392+K01365+K07375+K02154+K05692+K05692+K05692+K02154+K02152+K07374+K01365
												Environmental Information Processing	Signal transduction	Wnt signaling pathway	13	74	0.615748	1	ko04310	LOC105224044(fz);LOC105224491(Notum);LOC105224601(pont);LOC105224647(esn);LOC105225090(Lrp6);LOC105226058(RhoL);LOC105226202(Wnt5);LOC105226733(Pkc53E);LOC105226958(CanA-14F);LOC105227682(Wnt2);LOC105228235(por);LOC105228851(shf);LOC105232091(Axn)	K02432+K19882+K04499+K04511+K03068+K04392+K00444+K02677+K04348+K00572+K00181+K01691+K02157
												Metabolism	Carbohydrate metabolism	Pyruvate metabolism	7	40	0.618719	1	ko00620	LOC105224512(Aldh1b1);LOC105227980(AcCoAS);LOC105229360(Fh);LOC105231405(ImpL3);LOC105231564(Acyp);LOC105232191(Pepck);LOC105232621(ACAT2)	K00128+K01895+K01679+K00016+K01512+K01596+K00626
												Organismal Systems	Immune system	Toll and Imd signaling pathway	14	80	0.622844	1	ko04624	LOC105222535(GNBP1);LOC105226802(ea);LOC105227455(etaTry);LOC105231286(PGRP-SD);LOC105231288(PGRP-LF);LOC105231777(CEC1);LOC105231782(CEC1);LOC105232010(GNBP3);LOC105232011(GNBP3);LOC105233457(spz);LOC105234252(key);LOC109579906(--);LOC115066596(Cfi);LOC115066711(--)	K20697+K20672+K20676+K01446+K01446+K20696+K20696+K20692+K20692+K20694+K20700+K10380+K20671+K20694
												Organismal Systems	Endocrine system	Melanogenesis	8	46	0.625874	1	ko04916	LOC105222892(Galphaq);LOC105222909(Gnaq);LOC105224044(fz);LOC105225576(Adcy9);LOC105226202(Wnt5);LOC105226733(Pkc53E);LOC105227682(Wnt2);LOC109579326(Gnaq)	K04634+K04634+K02432+K08049+K00444+K02677+K00572+K04634
												Cellular Processes	Cell growth and death	Ferroptosis	2	11	0.626308	1	ko04216	LOC105222526(nes);LOC105229852(SLC3A2)	K13515+K06519
												Metabolism	Metabolism of other amino acids	beta-Alanine metabolism	3	17	0.627198	1	ko00410	LOC105224512(Aldh1b1);LOC105224871(Gad1);LOC105231281(CG12262)	K00128+K01580+K00249
												Organismal Systems	Endocrine system	Regulation of lipolysis in adipocyte	4	23	0.631002	1	ko04923	LOC105225576(Adcy9);LOC105230125(--);LOC105230478(Npr1);MSTRG.8496(--)	K08049+K12323+K12323+K12323
												Environmental Information Processing	Signal transduction	Hippo signaling pathway	12	70	0.6509	1	ko04390	LOC105224044(fz);LOC105224222(gbb);LOC105224558(TGFBR1);LOC105225453(Act57B);LOC105226202(Wnt5);LOC105227682(Wnt2);LOC105228222(Act79B);LOC105229580(Act88F);LOC105229889(Act87E);LOC105230393(MPP5);LOC105232091(Axn);LOC115065999(dlg1)	K02432+K16621+K04674+K05692+K00444+K00572+K05692+K05692+K05692+K06091+K02157+K12076
												Organismal Systems	Immune system	Th17 cell differentiation	4	24	0.665962	1	ko04659	LOC105224558(TGFBR1);LOC105226434(Hsp83);LOC105226958(CanA-14F);LOC105231797(sima)	K04674+K04079+K04348+K08268
												Human Diseases	Infectious diseases	Salmonella infection	6	36	0.669421	1	ko05132	LOC105225453(Act57B);LOC105226058(RhoL);LOC105228222(Act79B);LOC105229580(Act88F);LOC105229889(Act87E);LOC105234174(Flnc)	K05692+K04392+K05692+K05692+K05692+K04437
												Organismal Systems	Nervous system	Long-term potentiation	7	42	0.672475	1	ko04720	LOC105222892(Galphaq);LOC105222909(Gnaq);LOC105226733(Pkc53E);LOC105226958(CanA-14F);LOC105233100(Grin2b);LOC109579326(Gnaq);LOC109580066(--)	K04634+K04634+K02677+K04348+K05210+K04634+K05210
												Organismal Systems	Development	Axon guidance	10	60	0.683316	1	ko04360	LOC105223918(smo);LOC105224222(gbb);LOC105226058(RhoL);LOC105226202(Wnt5);LOC105226733(Pkc53E);LOC105226958(CanA-14F);LOC105227075(--);LOC105228810(NetA);LOC105228861(NetB);LOC105232048(csw)	K06226+K16621+K04392+K00444+K02677+K04348+K05463+K06843+K06843+K07293
												Cellular Processes	Cell growth and death	Cellular senescence	11	66	0.687126	1	ko04218	LOC105223735(lok);LOC105224558(TGFBR1);LOC105224975(sesB);LOC105226528(Hus1);LOC105226958(CanA-14F);LOC105227418(CycA);LOC105227627(Cdk2);LOC105228807(MAPk-Ak2);LOC105231615(pnr);LOC105231705(CycB3);LOC105234013(HIPK2)	K06641+K04674+K05863+K10903+K04348+K06627+K02206+K04443+K09183+K21771+K08826
												Organismal Systems	Endocrine system	Thyroid hormone synthesis	6	37	0.696417	1	ko04918	LOC105222892(Galphaq);LOC105222909(Gnaq);LOC105225576(Adcy9);LOC105226733(Pkc53E);LOC105232524(HSP90B1);LOC109579326(Gnaq)	K04634+K04634+K08049+K02677+K09487+K04634
												Human Diseases	Immune diseases	Rheumatoid arthritis	5	31	0.696496	1	ko05323	LOC105226824(Cp1);LOC105227818(ATP6V0A1);LOC105231750(Atp6v0a1);LOC105232161(Vha13);LOC105232835(Ctla2a)	K01365+K02154+K02154+K02152+K01365
												Human Diseases	Infectious diseases	Influenza A	15	90	0.702283	1	ko05164	LOC105224006(Hsc70-1);LOC105224975(sesB);LOC105225162(thetaTry);LOC105225165(ami);LOC105225453(Act57B);LOC105226733(Pkc53E);LOC105228222(Act79B);LOC105228391(TRYP4);LOC105228530(DNAJC3);LOC105229580(Act88F);LOC105229889(Act87E);LOC105230724(FDPS);LOC105231830(Hsc70-2);LOC105233538(Cyt-c-p);LOC109579825(thetaTry)	K03283+K05863+K01312+K01312+K05692+K02677+K05692+K01312+K09523+K05692+K05692+K00787+K03283+K08738+K01312
												Metabolism	Lipid metabolism	Synthesis and degradation of ketone bodies	1	6	0.703495	1	ko00072	LOC105232621(ACAT2)	K00626
												Metabolism	Glycan biosynthesis and metabolism	Glycosphingolipid biosynthesis - globo and isoglobo series	1	6	0.703495	1	ko00603	LOC105227741(NAGA)	K01189
												Metabolism	Energy metabolism	Sulfur metabolism	1	6	0.703495	1	ko00920	LOC105228313(CG7280)	K00387
												Organismal Systems	Environmental adaptation	Circadian rhythm - fly	1	6	0.703495	1	ko04711	LOC105229038(HLF)	K09057
												Human Diseases	Infectious diseases	Malaria	1	6	0.703495	1	ko05144	LOC105222583(thbs3a)	K04659
												Organismal Systems	Endocrine system	Thyroid hormone signaling pathway	11	67	0.706989	1	ko04919	LOC105224618(Pfk);LOC105225156(skd);LOC105225453(Act57B);LOC105225577(Pdk1);LOC105226733(Pkc53E);LOC105228222(Act79B);LOC105229580(Act88F);LOC105229794(Mhc);LOC105229889(Act87E);LOC105231615(pnr);LOC105231797(sima)	K00850+K15164+K05692+K06276+K02677+K05692+K05692+K17751+K05692+K09183+K08268
												Organismal Systems	Development	Dorso-ventral axis formation	5	32	0.724099	1	ko04320	LOC105222837(Egfr);LOC105226448(rho);LOC105228744(aop);LOC105230567(aub);LOC105232402(grk)	K04361+K02857+K03211+K02156+K02447
												Human Diseases	Infectious diseases	Bacterial invasion of epithelial cells	5	32	0.724099	1	ko05100	LOC105225453(Act57B);LOC105226058(RhoL);LOC105228222(Act79B);LOC105229580(Act88F);LOC105229889(Act87E)	K05692+K04392+K05692+K05692+K05692
												Environmental Information Processing	Signal transduction	FoxO signaling pathway	10	62	0.724201	1	ko04068	LOC105222157(HOMER2);LOC105222837(Egfr);LOC105224558(TGFBR1);LOC105225577(Pdk1);LOC105227188(--);LOC105227347(polo);LOC105227627(Cdk2);LOC105229463(SAK);LOC105231705(CycB3);LOC105232191(Pepck)	K15010+K04361+K04674+K06276+K15464+K06631+K02206+K08863+K21771+K01596
												Cellular Processes	Cellular community - eukaryotes	Tight junction	10	62	0.724201	1	ko04530	LOC105225453(Act57B);LOC105225618(Actn);LOC105226058(RhoL);LOC105228222(Act79B);LOC105229580(Act88F);LOC105229889(Act87E);LOC105230393(MPP5);LOC105231615(pnr);LOC105232619(alphaTub67C);LOC115065999(dlg1)	K05692+K05699+K04392+K05692+K05692+K05692+K06091+K09183+K07374+K12076
												Environmental Information Processing	Signaling molecules and interaction	Neuroactive ligand-receptor interaction	11	68	0.726049	1	ko04080	LOC105221829(Gabbr1);LOC105224042(Grd);LOC105225162(thetaTry);LOC105225165(ami);LOC105228391(TRYP4);LOC105229170(crhr1);LOC105230555(5-HT1A);LOC105233100(Grin2b);LOC109579825(thetaTry);LOC109580066(--);LOC115065809(Gabbr1)	K04615+K05175+K01312+K01312+K01312+K04578+K04153+K05210+K01312+K05210+K04615
												Organismal Systems	Immune system	IL-17 signaling pathway	3	20	0.738253	1	ko04657	LOC105226434(Hsp83);LOC105228241(Erk7);LOC105232524(HSP90B1)	K04079+K19603+K09487
												Organismal Systems	Development	Osteoclast differentiation	4	27	0.756808	1	ko04380	LOC105224558(TGFBR1);LOC105226058(RhoL);LOC105226958(CanA-14F);LOC105229269(Btk29A)	K04674+K04392+K04348+K07364
												Metabolism	Metabolism of cofactors and vitamins	Riboflavin metabolism	1	7	0.757934	1	ko00740	LOC105226349(stp1)	K14394
												Organismal Systems	Digestive system	Salivary secretion	9	58	0.761809	1	ko04970	LOC105222892(Galphaq);LOC105222909(Gnaq);LOC105224682(Amy-p);LOC105225576(Adcy9);LOC105225976(Slc12a2);LOC105226733(Pkc53E);LOC105231043(Gycalpha99B);LOC105232516(GUCY1B1);LOC109579326(Gnaq)	K04634+K04634+K01176+K08049+K10951+K02677+K12318+K12319+K04634
												Environmental Information Processing	Signal transduction	Ras signaling pathway	12	76	0.762322	1	ko04014	LOC105222837(Egfr);LOC105223991(btl);LOC105224532(PLA2);LOC105226058(RhoL);LOC105226733(Pkc53E);LOC105227365(PLA2G12B);LOC105232029(Gnb5);LOC105232048(csw);LOC105232251(Ggamma30A);LOC105232554(--);LOC105233100(Grin2b);LOC109580066(--)	K04361+K05093+K01047+K04392+K02677+K01047+K04539+K07293+K04547+K01047+K05210+K05210
												Organismal Systems	Endocrine system	Relaxin signaling pathway	8	52	0.762849	1	ko04926	LOC105222837(Egfr);LOC105223909(Col4a1);LOC105223911(COL4A1);LOC105224558(TGFBR1);LOC105225576(Adcy9);LOC105226733(Pkc53E);LOC105232029(Gnb5);LOC105232251(Ggamma30A)	K04361+K06237+K06237+K04674+K08049+K02677+K04539+K04547
												Human Diseases	Cancers	Breast cancer	6	40	0.768301	1	ko05224	LOC105222837(Egfr);LOC105224044(fz);LOC105225090(Lrp6);LOC105226202(Wnt5);LOC105227682(Wnt2);LOC105232091(Axn)	K04361+K02432+K03068+K00444+K00572+K02157
												Organismal Systems	Immune system	Cytosolic DNA-sensing pathway	3	21	0.768893	1	ko04623	LOC105223075(Polr1c);LOC105224743(Polr3h);LOC105225953(POLR2H)	K03027+K03022+K03016
												Human Diseases	Infectious diseases	Toxoplasmosis	5	34	0.773786	1	ko05145	LOC105224006(Hsc70-1);LOC105225577(Pdk1);LOC105231830(Hsc70-2);LOC105232696(LanA);LOC105233538(Cyt-c-p)	K03283+K06276+K03283+K06240+K08738
												Organismal Systems	Nervous system	Dopaminergic synapse	9	59	0.779851	1	ko04728	LOC105222892(Galphaq);LOC105222909(Gnaq);LOC105226733(Pkc53E);LOC105226958(CanA-14F);LOC105232029(Gnb5);LOC105232251(Ggamma30A);LOC105233100(Grin2b);LOC109579326(Gnaq);LOC109580066(--)	K04634+K04634+K02677+K04348+K04539+K04547+K05210+K04634+K05210
												Human Diseases	Infectious diseases	Human cytomegalovirus infection	11	72	0.794029	1	ko05163	LOC105222837(Egfr);LOC105222892(Galphaq);LOC105222909(Gnaq);LOC105225576(Adcy9);LOC105226058(RhoL);LOC105226733(Pkc53E);LOC105226958(CanA-14F);LOC105232029(Gnb5);LOC105232251(Ggamma30A);LOC105233538(Cyt-c-p);LOC109579326(Gnaq)	K04361+K04634+K04634+K08049+K04392+K02677+K04348+K04539+K04547+K08738+K04634
												Genetic Information Processing	Replication and repair	DNA replication	5	35	0.795925	1	ko03030	LOC105223304(Mcm6);LOC105226613(Mcm2);LOC105228957(dpa);LOC105229089(Mcm7);LOC105233911(DNApol-alpha73)	K02542+K02540+K02212+K02210+K02321
												Human Diseases	Infectious diseases	Shigellosis	5	35	0.795925	1	ko05131	LOC105225453(Act57B);LOC105226058(RhoL);LOC105228222(Act79B);LOC105229580(Act88F);LOC105229889(Act87E)	K05692+K04392+K05692+K05692+K05692
												Human Diseases	Cancers	Colorectal cancer	5	35	0.795925	1	ko05210	LOC105222837(Egfr);LOC105224558(TGFBR1);LOC105226058(RhoL);LOC105232091(Axn);LOC105233538(Cyt-c-p)	K04361+K04674+K04392+K02157+K08738
												Organismal Systems	Endocrine system	Glucagon signaling pathway	8	54	0.799519	1	ko04922	LOC105222009(GlyP);LOC105222892(Galphaq);LOC105222909(Gnaq);LOC105224618(Pfk);LOC105226958(CanA-14F);LOC105231405(ImpL3);LOC105232191(Pepck);LOC109579326(Gnaq)	K00688+K04634+K04634+K00850+K04348+K00016+K01596+K04634
												Organismal Systems	Immune system	Natural killer cell mediated cytotoxicity	4	29	0.805943	1	ko04650	LOC105226058(RhoL);LOC105226733(Pkc53E);LOC105226958(CanA-14F);LOC105232048(csw)	K04392+K02677+K04348+K07293
												Human Diseases	Cancers	Non-small cell lung cancer	4	29	0.805943	1	ko05223	LOC105222837(Egfr);LOC105225577(Pdk1);LOC105226691(Alk);LOC105226733(Pkc53E)	K04361+K06276+K05119+K02677
												Human Diseases	Infectious diseases	Human papillomavirus infection	21	133	0.811132	1	ko05165	LOC105222522(--);LOC105222583(thbs3a);LOC105222837(Egfr);LOC105223909(Col4a1);LOC105223911(COL4A1);LOC105224044(fz);LOC105225766(HDAC11);LOC105226202(Wnt5);LOC105227172(SSPO);LOC105227418(CycA);LOC105227627(Cdk2);LOC105227682(Wnt2);LOC105227818(ATP6V0A1);LOC105229760(HDAC6);LOC105230174(Col1a2);LOC105230393(MPP5);LOC105231750(Atp6v0a1);LOC105232091(Axn);LOC105232161(Vha13);LOC105232696(LanA);LOC1…	K08131+K04659+K04361+K06237+K06237+K02432+K11418+K00444+K03900+K06627+K02206+K00572+K02154+K11407+K19719+K06091+K02154+K02157+K02152+K06240+K12076
												Human Diseases	Endocrine and metabolic diseases	Insulin resistance	7	49	0.820642	1	ko04931	LOC105222009(GlyP);LOC105225577(Pdk1);LOC105231918(GFPT2);LOC105232048(csw);LOC105232191(Pepck);LOC105232625(Gbs-76A);MSTRG.2113(SLC27A4)	K00688+K06276+K00820+K07293+K01596+K07189+K08745
												Organismal Systems	Excretory system	Collecting duct acid secretion	3	23	0.821374	1	ko04966	LOC105227818(ATP6V0A1);LOC105231750(Atp6v0a1);LOC105232161(Vha13)	K02154+K02154+K02152
												Metabolism	Carbohydrate metabolism	Citrate cycle (TCA cycle)	5	37	0.835065	1	ko00020	LOC105224810(Idh1);LOC105228335(SdhB);LOC105228673(SdhA);LOC105229360(Fh);LOC105232191(Pepck)	K00031+K00235+K00234+K01679+K01596
												Human Diseases	Infectious diseases	Kaposi sarcoma-associated herpesvirus infection	7	50	0.836759	1	ko05167	LOC105226058(RhoL);LOC105226958(CanA-14F);LOC105228807(MAPk-Ak2);LOC105231797(sima);LOC105232029(Gnb5);LOC105232251(Ggamma30A);LOC105233538(Cyt-c-p)	K04392+K04348+K04443+K08268+K04539+K04547+K08738
												Organismal Systems	Immune system	Hematopoietic cell lineage	1	9	0.838696	1	ko04640	LOC105230937(Anpep)	K11140
												Human Diseases	Cancers	Bladder cancer	1	9	0.838696	1	ko05219	LOC105222837(Egfr)	K04361
												Human Diseases	Cancers	Endometrial cancer	3	24	0.843576	1	ko05213	LOC105222837(Egfr);LOC105225577(Pdk1);LOC105232091(Axn)	K04361+K06276+K02157
												Genetic Information Processing	Replication and repair	Base excision repair	2	17	0.846566	1	ko03410	LOC105224341(Ogg1);LOC105225759(TDG)	K03660+K20813
												Environmental Information Processing	Signal transduction	Hippo signaling pathway - multiple species	2	17	0.846566	1	ko04392	LOC105223592(ds);LOC105229262(ex)	K16507+K16683
												Human Diseases	Neurodegenerative diseases	Prion diseases	2	17	0.846566	1	ko05020	LOC105224006(Hsc70-1);LOC105231830(Hsc70-2)	K03283+K03283
												Environmental Information Processing	Signal transduction	VEGF signaling pathway	4	31	0.846691	1	ko04370	LOC105226058(RhoL);LOC105226733(Pkc53E);LOC105226958(CanA-14F);LOC105228807(MAPk-Ak2)	K04392+K02677+K04348+K04443
												Cellular Processes	Cell growth and death	Cell cycle	11	76	0.848908	1	ko04110	LOC105223304(Mcm6);LOC105223735(lok);LOC105226284(Orc3);LOC105226613(Mcm2);LOC105227347(polo);LOC105227418(CycA);LOC105227627(Cdk2);LOC105228957(dpa);LOC105229089(Mcm7);LOC105231705(CycB3);LOC105231986(cdc45)	K02542+K06641+K02605+K02540+K06631+K06627+K02206+K02212+K02210+K21771+K06628
												Human Diseases	Cancers	Transcriptional misregulation in cancers	7	51	0.851705	1	ko05202	LOC105221788(--);LOC105222537(Ddx17);LOC105223352(trx);LOC105224398(prd);LOC105227418(CycA);LOC105228744(aop);LOC105233575(Kdm6a)	K06571+K12823+K09186+K09381+K06627+K03211+K11447
												Human Diseases	Endocrine and metabolic diseases	AGE-RAGE signaling pathway in diabetic complications	5	38	0.85221	1	ko04933	LOC105223909(Col4a1);LOC105223911(COL4A1);LOC105224558(TGFBR1);LOC105226058(RhoL);LOC105226733(Pkc53E)	K06237+K06237+K04674+K04392+K02677
												Cellular Processes	Cell motility	Regulation of actin cytoskeleton	9	64	0.855304	1	ko04810	LOC105222837(Egfr);LOC105223991(btl);LOC105225453(Act57B);LOC105225618(Actn);LOC105226058(RhoL);LOC105228222(Act79B);LOC105229580(Act88F);LOC105229886(Gel);LOC105229889(Act87E)	K04361+K05093+K05692+K05699+K04392+K05692+K05692+K05768+K05692
												Human Diseases	Cancers	MicroRNAs in cancer	9	64	0.855304	1	ko05206	LOC105222837(Egfr);LOC105223845(Abcb1a);LOC105224675(dcr-1);LOC105224907(sn);LOC105225224(--);LOC105226582(Tm1);LOC105226733(Pkc53E);LOC105227710(wech);LOC105231411(Kif23)	K04361+K05658+K11592+K17455+K09409+K10373+K02677+K12035+K17387
												Human Diseases	Substance dependence	Alcoholism	6	45	0.858704	1	ko05034	LOC105225766(HDAC11);LOC105229760(HDAC6);LOC105232029(Gnb5);LOC105232251(Ggamma30A);LOC105233100(Grin2b);LOC109580066(--)	K11418+K11407+K04539+K04547+K05210+K05210
												Metabolism	Carbohydrate metabolism	Fructose and mannose metabolism	3	25	0.863347	1	ko00051	LOC105224618(Pfk);LOC105225298(CG10688);LOC105225946(Khk)	K00850+K17497+K00846
												Human Diseases	Cancers	Pancreatic cancer	3	25	0.863347	1	ko05212	LOC105222837(Egfr);LOC105224558(TGFBR1);LOC105226058(RhoL)	K04361+K04674+K04392
												Organismal Systems	Immune system	T cell receptor signaling pathway	4	32	0.864204	1	ko04660	LOC105225577(Pdk1);LOC105226958(CanA-14F);LOC105229269(Btk29A);LOC115065999(dlg1)	K06276+K04348+K07364+K12076
												Organismal Systems	Endocrine system	Insulin secretion	7	52	0.865527	1	ko04911	LOC105222612(Snap25);LOC105222892(Galphaq);LOC105222909(Gnaq);LOC105225576(Adcy9);LOC105226733(Pkc53E);LOC105230845(Rims1);LOC109579326(Gnaq)	K18211+K04634+K04634+K08049+K02677+K15297+K04634
												Metabolism	Metabolism of cofactors and vitamins	One carbon pool by folate	1	10	0.86834	1	ko00670	LOC105222766(Shmt1)	K00600
												Environmental Information Processing	Signal transduction	Hedgehog signaling pathway	2	18	0.868952	1	ko04340	LOC105223918(smo);LOC105227001(KIF3A)	K06226+K10394
												Metabolism	Carbohydrate metabolism	Starch and sucrose metabolism	4	33	0.879975	1	ko00500	LOC105222009(GlyP);LOC105224682(Amy-p);LOC105228045(Mal-A3);LOC105228097(Pgi)	K00688+K01176+K01187+K01810
												Human Diseases	Infectious diseases	Measles	4	33	0.879975	1	ko05162	LOC105224006(Hsc70-1);LOC105227627(Cdk2);LOC105231830(Hsc70-2);LOC105233949(Rchy1)	K03283+K02206+K03283+K10144
												Organismal Systems	Nervous system	Retrograde endocannabinoid signaling	10	73	0.885507	1	ko04723	LOC105222892(Galphaq);LOC105222909(Gnaq);LOC105224042(Grd);LOC105225576(Adcy9);LOC105226733(Pkc53E);LOC105228248(Dagla);LOC105232029(Gnb5);LOC105232251(Ggamma30A);LOC105232863(ND-ACP);LOC109579326(Gnaq)	K04634+K04634+K05175+K08049+K02677+K13806+K04539+K04547+K03955+K04634
												Organismal Systems	Endocrine system	GnRH signaling pathway	6	47	0.885663	1	ko04912	LOC105222837(Egfr);LOC105222892(Galphaq);LOC105222909(Gnaq);LOC105225576(Adcy9);LOC105226733(Pkc53E);LOC109579326(Gnaq)	K04361+K04634+K04634+K08049+K02677+K04634
												Environmental Information Processing	Signal transduction	Jak-STAT signaling pathway	2	19	0.888301	1	ko04630	LOC105222837(Egfr);LOC105232048(csw)	K04361+K07293
												Genetic Information Processing	Replication and repair	Fanconi anemia pathway	3	27	0.896398	1	ko03460	LOC105223535(mei-9);LOC105225284(UBC37);LOC105228187(FANCM)	K10848+K13960+K10896
												Human Diseases	Substance dependence	Cocaine addiction	2	20	0.904973	1	ko05030	LOC105233100(Grin2b);LOC109580066(--)	K05210+K05210
												Cellular Processes	Cell growth and death	Necroptosis	5	42	0.906624	1	ko04217	LOC105222009(GlyP);LOC105222926(Gdh);LOC105224138(Gs2);LOC105224975(sesB);LOC105226434(Hsp83)	K00688+K00261+K01915+K05863+K04079
												Organismal Systems	Immune system	Fc gamma R-mediated phagocytosis	6	49	0.908142	1	ko04666	LOC105226058(RhoL);LOC105226733(Pkc53E);LOC105227846(PLPP1);LOC105227847(PLPP3);LOC105227848(PLPP1);LOC105229886(Gel)	K04392+K02677+K01080+K01080+K01080+K05768
												Human Diseases	Infectious diseases	Epithelial cell signaling in Helicobacter pylori infection	6	49	0.908142	1	ko05120	LOC105222837(Egfr);LOC105226058(RhoL);LOC105227818(ATP6V0A1);LOC105231750(Atp6v0a1);LOC105232048(csw);LOC105232161(Vha13)	K04361+K04392+K02154+K02154+K07293+K02152
												Organismal Systems	Immune system	Fc epsilon RI signaling pathway	3	28	0.910069	1	ko04664	LOC105225577(Pdk1);LOC105226058(RhoL);LOC105226733(Pkc53E)	K06276+K04392+K02677
												Environmental Information Processing	Signal transduction	Phospholipase D signaling pathway	8	63	0.913667	1	ko04072	LOC105222837(Egfr);LOC105225576(Adcy9);LOC105226733(Pkc53E);LOC105227846(PLPP1);LOC105227847(PLPP3);LOC105227848(PLPP1);LOC105230334(CG34384);LOC105232048(csw)	K04361+K08049+K02677+K01080+K01080+K01080+K00901+K07293
												Genetic Information Processing	Folding, sorting and degradation	RNA degradation	6	50	0.917876	1	ko03018	LOC105223684(Trf4-1);LOC105224618(Pfk);LOC105227093(Dis3);LOC105229315(EXOSC3);LOC105231012(PNPT1);LOC105233196(EXOSC10)	K03514+K00850+K12585+K03681+K00962+K12591
												Organismal Systems	Immune system	B cell receptor signaling pathway	2	21	0.919298	1	ko04662	LOC105226058(RhoL);LOC105226958(CanA-14F)	K04392+K04348
												Organismal Systems	Immune system	C-type lectin receptor signaling pathway	3	29	0.922083	1	ko04625	LOC105226958(CanA-14F);LOC105228807(MAPk-Ak2);LOC105232048(csw)	K04348+K04443+K07293
												Organismal Systems	Sensory system	Inflammatory mediator regulation of TRP channels	5	44	0.926594	1	ko04750	LOC105222892(Galphaq);LOC105222909(Gnaq);LOC105225576(Adcy9);LOC105226733(Pkc53E);LOC109579326(Gnaq)	K04634+K04634+K08049+K02677+K04634
												Human Diseases	Substance dependence	Amphetamine addiction	4	37	0.928183	1	ko05031	LOC105226733(Pkc53E);LOC105226958(CanA-14F);LOC105233100(Grin2b);LOC109580066(--)	K02677+K04348+K05210+K05210
												Human Diseases	Cancers	Renal cell carcinoma	4	37	0.928183	1	ko05211	LOC105226058(RhoL);LOC105229360(Fh);LOC105231797(sima);LOC105232048(csw)	K04392+K01679+K08268+K07293
												Metabolism	Metabolism of cofactors and vitamins	Nicotinate and nicotinamide metabolism	1	13	0.928434	1	ko00760	LOC105227970(PNP)	K03783
												Human Diseases	Cancers	Melanoma	1	13	0.928434	1	ko05218	LOC105222837(Egfr)	K04361
												Organismal Systems	Excretory system	Vasopressin-regulated water reabsorption	2	22	0.931573	1	ko04962	LOC105225576(Adcy9);LOC105232186(ctp)	K08049+K10418
												Organismal Systems	Endocrine system	Progesterone-mediated oocyte maturation	6	52	0.934678	1	ko04914	LOC105225576(Adcy9);LOC105226434(Hsp83);LOC105227347(polo);LOC105227418(CycA);LOC105227627(Cdk2);LOC105231705(CycB3)	K08049+K04079+K06631+K06627+K02206+K21771
												Environmental Information Processing	Signal transduction	MAPK signaling pathway	12	93	0.93946	1	ko04010	LOC105222837(Egfr);LOC105223991(btl);LOC105224006(Hsc70-1);LOC105224558(TGFBR1);LOC105226058(RhoL);LOC105226733(Pkc53E);LOC105226958(CanA-14F);LOC105228807(MAPk-Ak2);LOC105231331(CACNA2D3);LOC105231830(Hsc70-2);LOC105233740(--);LOC105234174(Flnc)	K04361+K05093+K03283+K04674+K04392+K02677+K04348+K04443+K04860+K03283+K04380+K04437
												Organismal Systems	Endocrine system	Ovarian Steroidogenesis	1	14	0.941602	1	ko04913	LOC105225576(Adcy9)	K08049
												Environmental Information Processing	Signal transduction	TGF-beta signaling pathway	3	31	0.94182	1	ko04350	LOC105222840(ZFYVE9);LOC105224222(gbb);LOC105224558(TGFBR1)	K04679+K16621+K04674
												Metabolism	Glycan biosynthesis and metabolism	Glycosylphosphatidylinositol(GPI)-anchor biosynthesis	2	23	0.942068	1	ko00563	LOC105225030(--);LOC105233025(GPI11)	K09658+K05287
												Organismal Systems	Aging	Longevity regulating pathway - multiple species	5	46	0.942678	1	ko04213	LOC105224006(Hsc70-1);LOC105225576(Adcy9);LOC105228868(Ilp7);LOC105229288(EIF4EBP1);LOC105231830(Hsc70-2)	K03283+K08049+K19805+K18644+K03283
												Cellular Processes	Cellular community - eukaryotes	Signaling pathways regulating pluripotency of stem cells	5	46	0.942678	1	ko04550	LOC105223991(btl);LOC105224044(fz);LOC105226202(Wnt5);LOC105227682(Wnt2);LOC105232091(Axn)	K05093+K02432+K00444+K00572+K02157
												Organismal Systems	Excretory system	Aldosterone-regulated sodium reabsorption	2	24	0.951022	1	ko04960	LOC105225577(Pdk1);LOC105226733(Pkc53E)	K06276+K02677
												Human Diseases	Drug resistance	EGFR tyrosine kinase inhibitor resistance	3	33	0.956837	1	ko01521	LOC105222837(Egfr);LOC105223991(btl);LOC105226733(Pkc53E)	K04361+K05093+K02677
												Environmental Information Processing	Signal transduction	Hedgehog signaling pathway - fly	2	25	0.958646	1	ko04341	LOC105223918(smo);LOC105227616(hh)	K06226+K06224
												Organismal Systems	Nervous system	Synaptic vesicle cycle	5	49	0.9609	1	ko04721	LOC105222612(Snap25);LOC105227818(ATP6V0A1);LOC105231750(Atp6v0a1);LOC105232068(Rop);LOC105232161(Vha13)	K18211+K02154+K02154+K15292+K02152
												Environmental Information Processing	Signal transduction	Sphingolipid signaling pathway	7	64	0.963331	1	ko04071	LOC105222892(Galphaq);LOC105222909(Gnaq);LOC105225577(Pdk1);LOC105226058(RhoL);LOC105226733(Pkc53E);LOC105231761(CDase);LOC109579326(Gnaq)	K04634+K04634+K06276+K04392+K02677+K12349+K04634
												Environmental Information Processing	Signal transduction	AMPK signaling pathway	6	57	0.964097	1	ko04152	LOC105224618(Pfk);LOC105225577(Pdk1);LOC105227418(CycA);LOC105231787(D11DS);LOC105232191(Pepck);LOC105233729(Scd1)	K00850+K06276+K06627+K00507+K01596+K00507
												Human Diseases	Infectious diseases	Hepatitis C	2	26	0.965126	1	ko05160	LOC105222837(Egfr);LOC105225577(Pdk1)	K04361+K06276
												Human Diseases	Infectious diseases	Herpes simplex infection	7	65	0.967397	1	ko05168	LOC105225520(CG1785);LOC105227627(Cdk2);LOC105231720(B52);LOC105232048(csw);LOC105233009(--);LOC105233361(SRSF7);LOC105233538(Cyt-c-p)	K14840+K02206+K12893+K07293+K15414+K12896+K08738
												Human Diseases	Infectious diseases	Hepatitis B	5	51	0.969917	1	ko05161	LOC105224558(TGFBR1);LOC105226733(Pkc53E);LOC105227418(CycA);LOC105227627(Cdk2);LOC105233538(Cyt-c-p)	K04674+K02677+K06627+K02206+K08738
												Human Diseases	Cancers	Chronic myeloid leukemia	2	27	0.970624	1	ko05220	LOC105224558(TGFBR1);LOC105232048(csw)	K04674+K07293
												Environmental Information Processing	Signal transduction	MAPK signaling pathway - fly	10	87	0.970778	1	ko04013	LOC105222837(Egfr);LOC105226058(RhoL);LOC105228744(aop);LOC105229269(Btk29A);LOC105230340(sev);LOC105232048(csw);LOC105232240(bi);LOC105232402(grk);LOC105233721(vn);LOC115066508(--)	K04361+K04392+K03211+K07364+K05088+K07293+K10176+K02447+K16690+K20227
												Organismal Systems	Digestive system	Carbohydrate digestion and absorption	1	18	0.974127	1	ko04973	LOC105224682(Amy-p)	K01176
												Cellular Processes	Transport and catabolism	Mitophagy - animal	2	28	0.975282	1	ko04137	LOC105227188(--);LOC105231797(sima)	K15464+K08268
												Human Diseases	Infectious diseases	Pertussis	1	19	0.978895	1	ko05133	LOC105225811(CASP7)	K04397
												Human Diseases	Cancers	Acute myeloid leukemia	1	19	0.978895	1	ko05221	LOC105227418(CycA)	K06627
												Organismal Systems	Nervous system	Neurotrophin signaling pathway	4	46	0.979437	1	ko04722	LOC105225577(Pdk1);LOC105226058(RhoL);LOC105228807(MAPk-Ak2);LOC105232048(csw)	K06276+K04392+K04443+K07293
												Organismal Systems	Immune system	NOD-like receptor signaling pathway	3	38	0.98003	1	ko04621	LOC105221787(Dhx33);LOC105226171(Txn2);LOC105226434(Hsp83)	K17820+K03671+K04079
												Human Diseases	Cancers	Glioma	2	30	0.982552	1	ko05214	LOC105222837(Egfr);LOC105226733(Pkc53E)	K04361+K02677
												Organismal Systems	Immune system	Chemokine signaling pathway	4	48	0.984654	1	ko04062	LOC105225576(Adcy9);LOC105226058(RhoL);LOC105232029(Gnb5);LOC105232251(Ggamma30A)	K08049+K04392+K04539+K04547
												Genetic Information Processing	Replication and repair	Nucleotide excision repair	3	40	0.985453	1	ko03420	LOC105223535(mei-9);LOC105226657(ercc5);LOC105233982(Rad23b)	K10848+K10846+K10839
												Organismal Systems	Immune system	Th1 and Th2 cell differentiation	1	21	0.985959	1	ko04658	LOC105226958(CanA-14F)	K04348
												Human Diseases	Cancers	Viral carcinogenesis	9	87	0.986699	1	ko05203	LOC105225618(Actn);LOC105225766(HDAC11);LOC105226058(RhoL);LOC105227418(CycA);LOC105227627(Cdk2);LOC105228807(MAPk-Ak2);LOC105229760(HDAC6);LOC105229886(Gel);LOC115065999(dlg1)	K05699+K11418+K04392+K06627+K02206+K04443+K11407+K05768+K12076
												Human Diseases	Neurodegenerative diseases	Alzheimer disease	14	123	0.987925	1	ko05010	LOC105222892(Galphaq);LOC105222909(Gnaq);LOC105225811(CASP7);LOC105226958(CanA-14F);LOC105228335(SdhB);LOC105228673(SdhA);LOC105229678(blw);LOC105232504(ATP5MC2);LOC105232863(ND-ACP);LOC105233100(Grin2b);LOC105233538(Cyt-c-p);LOC105233740(--);LOC109579326(Gnaq);LOC109580066(--)	K04634+K04634+K04397+K04348+K00235+K00234+K02132+K02128+K03955+K05210+K08738+K04380+K04634+K05210
												Environmental Information Processing	Signal transduction	HIF-1 signaling pathway	5	59	0.989972	1	ko04066	LOC105222837(Egfr);LOC105224618(Pfk);LOC105226733(Pkc53E);LOC105231405(ImpL3);LOC105231797(sima)	K04361+K00850+K02677+K00016+K08268
												Cellular Processes	Transport and catabolism	Autophagy - other eukaryotes	1	23	0.990662	1	ko04136	LOC105233378(WIPI1)	K17908
												Genetic Information Processing	Replication and repair	Homologous recombination	1	24	0.992386	1	ko03440	LOC105229007(--)	K10871
												Human Diseases	Drug resistance	Endocrine resistance	2	35	0.992806	1	ko01522	LOC105222837(Egfr);LOC105225576(Adcy9)	K04361+K08049
												Environmental Information Processing	Signal transduction	TNF signaling pathway	1	26	0.994938	1	ko04668	LOC105225811(CASP7)	K04397
												Environmental Information Processing	Signal transduction	mTOR signaling pathway	9	95	0.994951	1	ko04150	LOC105224044(fz);LOC105225090(Lrp6);LOC105225577(Pdk1);LOC105226202(Wnt5);LOC105226733(Pkc53E);LOC105227271(Rictor);LOC105227682(Wnt2);LOC105229852(SLC3A2);LOC105232161(Vha13)	K02432+K03068+K06276+K00444+K02677+K08267+K00572+K06519+K02152
												Human Diseases	Infectious diseases	HTLV-I infection	10	103	0.995287	1	ko05166	LOC105223735(lok);LOC105224044(fz);LOC105224558(TGFBR1);LOC105224975(sesB);LOC105225576(Adcy9);LOC105226202(Wnt5);LOC105226958(CanA-14F);LOC105227682(Wnt2);LOC105230724(FDPS);LOC115065999(dlg1)	K06641+K02432+K04674+K05863+K08049+K00444+K04348+K00572+K00787+K12076
												Environmental Information Processing	Signal transduction	Phosphatidylinositol signaling system	4	56	0.995438	1	ko04070	LOC105222459(CdsA);LOC105226733(Pkc53E);LOC105229147(Mtmr14);LOC105230334(CG34384)	K00981+K02677+K18086+K00901
												Organismal Systems	Immune system	Toll-like receptor signaling pathway	1	27	0.995873	1	ko04620	LOC105226058(RhoL)	K04392
												Environmental Information Processing	Signal transduction	ErbB signaling pathway	2	39	0.996505	1	ko04012	LOC105222837(Egfr);LOC105226733(Pkc53E)	K04361+K02677
												Cellular Processes	Transport and catabolism	Autophagy - animal	8	91	0.996825	1	ko04140	LOC105225577(Pdk1);LOC105226824(Cp1);LOC105227188(--);LOC105229147(Mtmr14);LOC105229613(RB1CC1);LOC105231797(sima);LOC105232835(Ctla2a);LOC105233378(WIPI1)	K06276+K01365+K15464+K18086+K17589+K08268+K01365+K17908
												Organismal Systems	Endocrine system	Prolactin signaling pathway	1	29	0.997258	1	ko04917	LOC105222808(Galt)	K00965
												Human Diseases	Neurodegenerative diseases	Parkinson disease	9	100	0.997322	1	ko05012	LOC105224975(sesB);LOC105228335(SdhB);LOC105228673(SdhA);LOC105228809(UBE2G2);LOC105229678(blw);LOC105229787(HtrA2);LOC105232504(ATP5MC2);LOC105232863(ND-ACP);LOC105233538(Cyt-c-p)	K05863+K00235+K00234+K04555+K02132+K08669+K02128+K03955+K08738
												Metabolism	Carbohydrate metabolism	Inositol phosphate metabolism	2	41	0.997573	1	ko00562	LOC105222319(Inos);LOC105229147(Mtmr14)	K01858+K18086
												Human Diseases	Infectious diseases	Tuberculosis	4	62	0.998232	1	ko05152	LOC105226958(CanA-14F);LOC105227818(ATP6V0A1);LOC105231750(Atp6v0a1);LOC105233538(Cyt-c-p)	K04348+K02154+K02154+K08738
												Organismal Systems	Aging	Longevity regulating pathway - mammal	2	43	0.998318	1	ko04211	LOC105225576(Adcy9);LOC105229613(RB1CC1)	K08049+K17589
												Organismal Systems	Endocrine system	Insulin signaling pathway	4	63	0.998494	1	ko04910	LOC105222009(GlyP);LOC105225577(Pdk1);LOC105232191(Pepck);LOC105232625(Gbs-76A)	K00688+K06276+K01596+K07189
												Genetic Information Processing	Folding, sorting and degradation	Ubiquitin mediated proteolysis	6	81	0.99864	1	ko04120	LOC105224961(KLHL12);LOC105226122(HERC2);LOC105228809(UBE2G2);LOC105229226(CG4502);LOC105232205(--);LOC105233949(Rchy1)	K10456+K10595+K04555+K10582+K10456+K10144
												Human Diseases	Neurodegenerative diseases	Huntington disease	14	146	0.99907	1	ko05016	LOC105222892(Galphaq);LOC105222909(Gnaq);LOC105224751(Dnai2);LOC105224975(sesB);LOC105225953(POLR2H);LOC105228335(SdhB);LOC105228673(SdhA);LOC105229678(blw);LOC105232504(ATP5MC2);LOC105232863(ND-ACP);LOC105233100(Grin2b);LOC105233538(Cyt-c-p);LOC109579326(Gnaq);LOC109580066(--)	K04634+K04634+K11143+K05863+K03016+K00235+K00234+K02132+K02128+K03955+K05210+K08738+K04634+K05210
												Cellular Processes	Cell growth and death	Oocyte meiosis	4	69	0.999434	1	ko04114	LOC105225576(Adcy9);LOC105226958(CanA-14F);LOC105227347(polo);LOC105227627(Cdk2)	K08049+K04348+K06631+K02206
												Genetic Information Processing	Folding, sorting and degradation	Proteasome	1	37	0.999467	1	ko03050	LOC105233967(PSMB5)	K02737
												Organismal Systems	Environmental adaptation	Thermogenesis	14	151	0.999493	1	ko04714	LOC105224678(SPAC19A8.14);LOC105225453(Act57B);LOC105225576(Adcy9);LOC105228222(Act79B);LOC105228335(SdhB);LOC105228673(SdhA);LOC105229580(Act88F);LOC105229678(blw);LOC105229889(Act87E);LOC105230125(--);LOC105230478(Npr1);LOC105232504(ATP5MC2);LOC105232863(ND-ACP);MSTRG.8496(--)	K18177+K05692+K08049+K05692+K00235+K00234+K05692+K02132+K05692+K12323+K12323+K02128+K03955+K12323
												Human Diseases	Infectious diseases	Epstein-Barr virus infection	7	98	0.999617	1	ko05169	LOC105223075(Polr1c);LOC105224006(Hsc70-1);LOC105224743(Polr3h);LOC105225953(POLR2H);LOC105227418(CycA);LOC105227627(Cdk2);LOC105231830(Hsc70-2)	K03027+K03283+K03022+K03016+K06627+K02206+K03283
												Genetic Information Processing	Translation	RNA transport	9	117	0.999731	1	ko03013	LOC105224190(Rpp30);LOC105224740(POP1);LOC105225002(Nup93-1);LOC105227110(Pym);LOC105229153(STRAP);LOC105229288(EIF4EBP1);LOC105230873(Ef1alpha100E);LOC105232194(nmd3);LOC109580059(--)	K03539+K01164+K14309+K14294+K13137+K18644+K03231+K07562+K14314
												Metabolism	Energy metabolism	Oxidative phosphorylation	8	109	0.999739	1	ko00190	LOC105227818(ATP6V0A1);LOC105228335(SdhB);LOC105228673(SdhA);LOC105229678(blw);LOC105231750(Atp6v0a1);LOC105232161(Vha13);LOC105232504(ATP5MC2);LOC105232863(ND-ACP)	K02154+K00235+K00234+K02132+K02154+K02152+K02128+K03955
												Cellular Processes	Transport and catabolism	Endocytosis	8	109	0.999739	1	ko04144	LOC105222837(Egfr);LOC105222840(ZFYVE9);LOC105223991(btl);LOC105224006(Hsc70-1);LOC105224558(TGFBR1);LOC105228521(spartin);LOC105231724(snf8);LOC105231830(Hsc70-2)	K04361+K04679+K05093+K03283+K04674+K19366+K12188+K03283
												Genetic Information Processing	Transcription	Spliceosome	8	112	0.999832	1	ko03040	LOC105221965(SmD3);LOC105222537(Ddx17);LOC105224006(Hsc70-1);LOC105224424(Sf3b3);LOC105226454(hoip);LOC105231720(B52);LOC105231830(Hsc70-2);LOC105233361(SRSF7)	K11088+K12823+K03283+K12830+K12845+K12893+K03283+K12896
												Human Diseases	Endocrine and metabolic diseases	Non-alcoholic fatty liver disease (NAFLD)	6	96	0.999862	1	ko04932	LOC105225811(CASP7);LOC105226058(RhoL);LOC105228335(SdhB);LOC105228673(SdhA);LOC105232863(ND-ACP);LOC105233538(Cyt-c-p)	K04397+K04392+K00235+K00234+K03955+K08738
												Genetic Information Processing	Translation	mRNA surveillance pathway	2	63	0.999961	1	ko03015	LOC105227110(Pym);LOC105232787(Rb97D)	K14294+K14411
												Genetic Information Processing	Translation	Ribosome	3	123	1	1	ko03010	LOC105222138(RpS20);LOC105224390(rlp7);LOC105233101(sta)	K02969+K02937+K02998

## Sheet: Rect-0d-vs-Rect-12d.path
KEGG_A_class	KEGG_B_class	Pathway	Rect-0d-vs-Rect-12d (644)	All (3263)	Pvalue	Qvalue	Pathway ID	Genes	K_IDs
Metabolism	Global and overview maps	Metabolic pathways	222	877	1.19899e-06	0.000368089	ko01100	LOC105221826(KFase);LOC105221963(ALPL);LOC105222006(GALM);LOC105222132(SGSH);LOC105222232(Gapdh);LOC105222319(Inos);LOC105222459(CdsA);LOC105222650(slgA);LOC105222689(Gld);LOC105222716(Prat);LOC105222757(Ost48);LOC105222766(Shmt1);LOC105222790(Spr);LOC105222791(--);LOC105222926(Gdh);LOC105222986(CHIA);LOC105223075(Polr1c);LOC105223108(HMT-1);LOC105223190(sun);LOC105223267(F38B2.4);LOC105223314(AA…	K01432+K01077+K01785+K01565+K00134+K01858+K00981+K00318+K00115+K00764+K12670+K00600+K00072+K00072+K00261+K01183+K03027+K00547+K02135+K00939+K00106+K01968+K07151+K03002+K08764+K01001+K01937+K01937+K01135+K19269+K01251+K01915+K00294+K12657+K01697+K00710+K14455+K00128+K01047+K00002+K07151+K00281+K01176+K01077+K00457+K03022+K01077+K01077+K00864+K01183+K00031+K01580+K01555+K00699+K01074+K13247+K09658+…
Genetic Information Processing	Translation	Ribosome biogenesis in eukaryotes	29	66	5.32061e-06	0.000816714	ko03008	LOC105222115(wcd);LOC105222200(utp15);LOC105222326(TBL3);LOC105222593(PWP2);LOC105222801(Rrp7a);LOC105222975(Rtc1);LOC105223175(l(1)G0020);LOC105224199(--);LOC105224702(Nop60B);LOC105224740(POP1);LOC105224742(RIOK1);LOC105224868(BMS1);LOC105225517(NOB1);LOC105226454(hoip);LOC105226475(UTP4);LOC105227280(l(2)k09022);LOC105228100(--);LOC105228171(Fib);LOC105228679(eIF6);LOC105229256(NHP2);LOC105229…	K14553+K14549+K14555+K14558+K14545+K11108+K14521+K14552+K11131+K01164+K07178+K14569+K11883+K12845+K14548+K14550+K14546+K14563+K03264+K11129+K11130+K14554+K14556+K14566+K14568+K07562+K14564+K14565+K11128
Human Diseases	Cardiovascular diseases	Hypertrophic cardiomyopathy (HCM)	15	30	0.000183703	0.0187989	ko05410	LOC105225453(Act57B);LOC105226581(Tm2);LOC105226582(Tm1);LOC105228222(Act79B);LOC105229185(--);LOC105229580(Act88F);LOC105229794(Mhc);LOC105229889(Act87E);LOC105229913(Slc8a1);LOC105231331(CACNA2D3);LOC105232276(Acer);LOC105232277(Ance);LOC105232483(Lama1);LOC105232878(ACE);LOC105232923(Slc8a3)	K05692+K10374+K10373+K05692+K01283+K05692+K17751+K05692+K05849+K04860+K01283+K01283+K05637+K01283+K05849
Metabolism	Amino acid metabolism	Arginine and proline metabolism	16	37	0.000888077	0.0621064	ko00330	LOC105222650(slgA);LOC105224253(ALDH4A1);LOC105224260(Aldh18a1);LOC105224406(GOT2);LOC105224512(Aldh1b1);LOC105225237(Oat);LOC105226309(daao-1);LOC105226774(P4HA2);LOC105226778(P4HA2);LOC105229149(Nos);LOC105231755(P4HA2);LOC105231756(P4HA1);LOC105231760(P4HA1);LOC105232345(Nos);LOC105232635(Argk);LOC105233770(PYCR1)	K00318+K00294+K12657+K14455+K00128+K00819+K00273+K00472+K00472+K13240+K00472+K00472+K00472+K13240+K00933+K00286
Metabolism	Lipid metabolism	Glycerophospholipid metabolism	21	55	0.0010823	0.0621064	ko00564	LOC105222107(Taz);LOC105222459(CdsA);LOC105222526(nes);LOC105224532(PLA2);LOC105225068(chpt1);LOC105225662(Gpd2);LOC105227365(PLA2G12B);LOC105227484(eas);LOC105227846(PLPP1);LOC105227847(PLPP3);LOC105227848(PLPP1);LOC105228129(Gpat4);LOC105229745(CG8745);LOC105229768(ACHE1);LOC105230334(CG34384);LOC105230606(Mboat2);LOC105231000(PLPP2);LOC105232103(AGPAT1);LOC105232554(--);LOC105233389(SELENOI);L…	K13511+K00981+K13515+K01047+K00993+K00111+K01047+K00894+K01080+K01080+K01080+K13506+K14286+K01049+K00901+K13517+K01080+K13509+K01047+K00993+K00111
Human Diseases	Cardiovascular diseases	Dilated cardiomyopathy (DCM)	13	28	0.00121381	0.0621064	ko05414	LOC105225223(rut);LOC105225453(Act57B);LOC105225576(Adcy9);LOC105226581(Tm2);LOC105226582(Tm1);LOC105228222(Act79B);LOC105229580(Act88F);LOC105229794(Mhc);LOC105229889(Act87E);LOC105229913(Slc8a1);LOC105231331(CACNA2D3);LOC105232483(Lama1);LOC105232923(Slc8a3)	K08041+K05692+K08049+K10374+K10373+K05692+K05692+K17751+K05692+K05849+K04860+K05637+K05849
Metabolism	Glycan biosynthesis and metabolism	N-Glycan biosynthesis	15	35	0.00143359	0.062873	ko00510	LOC105222757(Ost48);LOC105223348(STT3B);LOC105223889(Dpagt1);LOC105224598(Stt3b);LOC105225030(--);LOC105228793(Ganab);LOC105229271(wol);LOC105229896(--);LOC105230239(st6gal2);LOC105230695(Rpn2);LOC105232327(CG10166);LOC105233566(RPN1);LOC105233977(alg11);LOC109579495(l(2)k12914);LOC115065705(ALG2)	K12670+K07151+K01001+K07151+K09658+K05546+K00729+K09659+K00778+K12667+K00721+K12666+K03844+K12668+K03843
Organismal Systems	Digestive system	Fat digestion and absorption	12	26	0.00199432	0.0709869	ko04975	LOC105224406(GOT2);LOC105224532(PLA2);LOC105227365(PLA2G12B);LOC105227846(PLPP1);LOC105227847(PLPP3);LOC105227848(PLPP1);LOC105230785(DGAT1);LOC105231000(PLPP2);LOC105232103(AGPAT1);LOC105232554(--);LOC105232621(ACAT2);MSTRG.2113(SLC27A4)	K14455+K01047+K01047+K01080+K01080+K01080+K11155+K01080+K13509+K01047+K00626+K08745
Metabolism	Glycan biosynthesis and metabolism	Other glycan degradation	10	20	0.00226401	0.0709869	ko00511	LOC105225659(GLB1);LOC105226747(GBA);LOC105227151(fdl);LOC105229172(fdl);LOC105229216(HEXB);LOC105230050(BRAFLDRAFT_56888);LOC105230294(Man2a2);LOC105230961(HEXDC);LOC105231812(MANBA);LOC105232311(MAN2B1)	K12309+K01201+K12373+K20730+K12373+K01206+K01191+K14459+K01192+K12311
Organismal Systems	Endocrine system	Renin secretion	14	33	0.00231228	0.0709869	ko04924	LOC105221964(olf186-F);LOC105222891(Galphaq);LOC105222892(Galphaq);LOC105222909(Gnaq);LOC105226958(CanA-14F);LOC105227540(slo);LOC105229185(--);LOC105230125(--);LOC105230478(Npr1);LOC105232276(Acer);LOC105232277(Ance);LOC105232516(GUCY1B1);LOC105232878(ACE);LOC109579326(Gnaq)	K16056+K04634+K04634+K04634+K04348+K04936+K01283+K12323+K12323+K01283+K01283+K12319+K01283+K04634
Human Diseases	Cardiovascular diseases	Viral myocarditis	9	18	0.00377194	0.105271	ko05416	LOC105225453(Act57B);LOC105226058(RhoL);LOC105226455(Eif4g3);LOC105228222(Act79B);LOC105229580(Act88F);LOC105229794(Mhc);LOC105229889(Act87E);LOC105232483(Lama1);LOC105233538(Cyt-c-p)	K05692+K04392+K03260+K05692+K05692+K17751+K05692+K05637+K08738
Metabolism	Lipid metabolism	Fatty acid biosynthesis	6	10	0.00586827	0.138416	ko00061	LOC105226031(Fasn);LOC105226742(Fasn);LOC105232303(bgm);LOC105232304(CG4500);LOC105232306(CG4500);LOC105234158(Oxsm)	K00665+K00665+K15013+K15013+K15013+K09458
Metabolism	Metabolism of cofactors and vitamins	Thiamine metabolism	9	19	0.0059327	0.138416	ko00730	LOC105221963(ALPL);LOC105223267(F38B2.4);LOC105224718(Alp-m);LOC105224766(ALPPL2);LOC105224767(Alp-m);LOC105226111(Alp-m);LOC105226149(ALPL);LOC105226349(stp1);LOC105227008(Alp4)	K01077+K00939+K01077+K01077+K01077+K01077+K01077+K14394+K01077
Environmental Information Processing	Signaling molecules and interaction	ECM-receptor interaction	8	16	0.00631214	0.138416	ko04512	LOC105222522(--);LOC105222583(thbs3a);LOC105223909(Col4a1);LOC105223911(COL4A1);LOC105227172(SSPO);LOC105230174(Col1a2);LOC105232483(Lama1);LOC105232696(LanA)	K08131+K04659+K06237+K06237+K03900+K19719+K05637+K06240
Organismal Systems	Immune system	Complement and coagulation cascades	3	3	0.00765914	0.142702	ko04610	LOC105226431(--);LOC105227172(SSPO);LOC105229510(F11)	K04008+K03900+K01323
Metabolism	Carbohydrate metabolism	Amino sugar and nucleotide sugar metabolism	17	48	0.00772183	0.142702	ko00520	LOC105222986(CHIA);LOC105224788(Cht2);LOC105225298(CG10688);LOC105226345(CHIA);LOC105226562(chs-2);LOC105227151(fdl);LOC105227416(cyb5r2);LOC105228097(Pgi);LOC105229216(HEXB);LOC105230995(Nagk);LOC105231918(GFPT2);LOC105232357(Cht10);LOC105232601(CG1969);LOC105233016(CMAS);LOC105233418(sgl);LOC105233954(Uap1);LOC109579331(--)	K01183+K01183+K17497+K01183+K00698+K12373+K00326+K01810+K12373+K00884+K00820+K01183+K00621+K21749+K00012+K00972+K01183
Metabolism	Metabolism of terpenoids and polyketides	Insect hormone biosynthesis	14	37	0.00790205	0.142702	ko00981	LOC105223819(SDR-1);LOC105223822(SDR-1);LOC105223827(SDR-1);LOC105224512(Aldh1b1);LOC105225924(shd);LOC105227167(PKS19);LOC105227882(SDR-1);LOC105227938(SDR-1);LOC105228715(jhamt);LOC105229968(Est-5A);LOC105230714(EH2);LOC105232612(PGLP2);LOC105232720(--);LOC109579509(daf-36)	K15890+K15890+K15890+K00128+K10723+K10718+K15890+K15890+K10718+K01063+K10719+K21013+K21013+K14938
Metabolism	Glycan biosynthesis and metabolism	Mucin type O-glycan biosynthesis	9	20	0.00893436	0.146731	ko00512	LOC105224387(pgant5);LOC105225146(pgant6);LOC105225671(C1GalTA);LOC105225673(C1GalTA);LOC105225674(C1GalTA);LOC105226423(GALNT14);LOC105226711(gly-5);LOC105229056(C1GalTA);LOC105229249(pgant2)	K00710+K00710+K00731+K00731+K00731+K00710+K00710+K00731+K00710
Metabolism	Metabolism of cofactors and vitamins	Folate biosynthesis	13	34	0.00937005	0.146731	ko00790	LOC105221963(ALPL);LOC105222790(Spr);LOC105222791(--);LOC105224718(Alp-m);LOC105224766(ALPPL2);LOC105224767(Alp-m);LOC105226111(Alp-m);LOC105226149(ALPL);LOC105227008(Alp4);LOC105228657(Pu);LOC105229079(Mocs1);LOC105229732(mal3);LOC105231029(Pcd)	K01077+K00072+K00072+K01077+K01077+K01077+K01077+K01077+K01077+K01495+K20967+K15631+K01724
Cellular Processes	Transport and catabolism	Lysosome	31	105	0.00955903	0.146731	ko04142	LOC105222101(--);LOC105222132(SGSH);LOC105223150(CG17119);LOC105223306(LAMP1);LOC105224017(Arsb);LOC105224023(CLN3);LOC105224057(CD63);LOC105224194(Lip1);LOC105224212(Lip1);LOC105224915(Ppt1);LOC105225529(GGA1);LOC105225659(GLB1);LOC105226747(GBA);LOC105226761(--);LOC105226824(Cp1);LOC105227151(fdl);LOC105227741(NAGA);LOC105227766(Cd53);LOC105227769(Cd63);LOC105227818(ATP6V0A1);LOC105227880(mfsd8…	K06564+K01565+K12386+K06528+K01135+K12389+K06497+K01052+K01052+K01074+K12404+K12309+K01201+K13443+K01365+K12373+K01189+K06497+K06497+K02154+K12307+K10532+K12373+K01206+K02154+K01192+K12311+K01365+K19363+K19363+K12382
Metabolism	Xenobiotics biodegradation and metabolism	Drug metabolism - cytochrome P450	19	57	0.0103571	0.151411	ko00982	LOC105224360(MGST1);LOC105224876(Ugt1a2);LOC105225812(GST1);LOC105225994(Gst4);LOC105227725(GST1);LOC105228298(GSTT1);LOC105229681(GST1);LOC105229689(GST1);LOC105229690(GstD1);LOC105230262(UGT8);LOC105230268(Ugt1a1);LOC105230325(ugt3);LOC105230805(UGT2B13);LOC105230828(UGT2B13);LOC105231237(UGT2B15);LOC105232983(Adh);LOC105234081(MGST1);LOC109579500(GST1);MSTRG.6737(GstD1)	K00799+K00699+K00799+K00799+K00799+K00799+K00799+K00799+K00799+K00699+K00699+K00699+K00699+K00699+K00699+K00001+K00799+K00799+K00799
Metabolism	Global and overview maps	Fatty acid metabolism	15	42	0.0110544	0.154259	ko01212	LOC105224915(Ppt1);LOC105226031(Fasn);LOC105226742(Fasn);LOC105227875(ACADSB);LOC105229168(CG5009);LOC105229169(CG5009);LOC105231230(HSDL1);LOC105231281(CG12262);LOC105231787(D11DS);LOC105232303(bgm);LOC105232304(CG4500);LOC105232306(CG4500);LOC105232621(ACAT2);LOC105233729(Scd1);LOC105234158(Oxsm)	K01074+K00665+K00665+K09478+K00232+K00232+K10251+K00249+K00507+K15013+K15013+K15013+K00626+K00507+K09458
Metabolism	Amino acid metabolism	Tyrosine metabolism	9	21	0.0129576	0.172955	ko00350	LOC105224406(GOT2);LOC105224730(Hpd);LOC105224873(FAH);LOC105225839(GstZ2);LOC105231903(yellow-f2);LOC105232983(Adh);LOC105233819(hgo);LOC105234241(amd);LOC115066680(hgo)	K14455+K00457+K01555+K01800+K22203+K00001+K00451+K01618+K00451
Human Diseases	Cardiovascular diseases	Arrhythmogenic right ventricular cardiomyopathy (ARVC)	8	18	0.0147966	0.187275	ko05412	LOC105225453(Act57B);LOC105228222(Act79B);LOC105229580(Act88F);LOC105229889(Act87E);LOC105229913(Slc8a1);LOC105231331(CACNA2D3);LOC105232483(Lama1);LOC105232923(Slc8a3)	K05692+K05692+K05692+K05692+K05849+K04860+K05637+K05849
Organismal Systems	Endocrine system	PPAR signaling pathway	13	36	0.0158604	0.187275	ko03320	LOC105223876(SCP2);LOC105224780(GK3P);LOC105225577(Pdk1);LOC105229168(CG5009);LOC105229169(CG5009);LOC105231281(CG12262);LOC105231787(D11DS);LOC105232191(Pepck);LOC105232303(bgm);LOC105232304(CG4500);LOC105232306(CG4500);LOC105233729(Scd1);MSTRG.2113(SLC27A4)	K08764+K00864+K06276+K00232+K00232+K00249+K00507+K01596+K15013+K15013+K15013+K00507+K08745
Organismal Systems	Sensory system	Phototransduction - fly	13	36	0.0158604	0.187275	ko04745	LOC105221897(trp);LOC105222891(Galphaq);LOC105222892(Galphaq);LOC105222909(Gnaq);LOC105223942(Arr2);LOC105225234(Gbeta76C);LOC105225453(Act57B);LOC105228222(Act79B);LOC105228248(Dagla);LOC105229580(Act88F);LOC105229889(Act87E);LOC105232251(Ggamma30A);LOC109579326(Gnaq)	K04967+K04634+K04634+K04634+K13805+K07972+K05692+K05692+K13806+K05692+K05692+K04547+K04634
Metabolism	Xenobiotics biodegradation and metabolism	Drug metabolism - other enzymes	25	84	0.017067	0.188402	ko00983	LOC105223314(AAO2);LOC105224360(MGST1);LOC105224876(Ugt1a2);LOC105225812(GST1);LOC105225994(Gst4);LOC105226045(UPP1);LOC105226072(Nme7);LOC105227725(GST1);LOC105228298(GSTT1);LOC105228611(ras);LOC105229681(GST1);LOC105229689(GST1);LOC105229690(GstD1);LOC105230262(UGT8);LOC105230268(Ugt1a1);LOC105230325(ugt3);LOC105230805(UGT2B13);LOC105230828(UGT2B13);LOC105231237(UGT2B15);LOC105231525(r-l);LOC10…	K00106+K00799+K00699+K00799+K00799+K00757+K00940+K00799+K00799+K00088+K00799+K00799+K00799+K00699+K00699+K00699+K00699+K00699+K00699+K13421+K00757+K00799+K00799+K03927+K00799
Human Diseases	Drug resistance	Platinum drug resistance	16	48	0.0179245	0.188402	ko01524	LOC105224360(MGST1);LOC105225577(Pdk1);LOC105225812(GST1);LOC105225994(Gst4);LOC105227725(GST1);LOC105228073(MLH1);LOC105228298(GSTT1);LOC105229681(GST1);LOC105229689(GST1);LOC105229690(GstD1);LOC105231062(--);LOC105233045(tefu);LOC105233538(Cyt-c-p);LOC105234081(MGST1);LOC109579500(GST1);MSTRG.6737(GstD1)	K00799+K06276+K00799+K00799+K00799+K08734+K00799+K00799+K00799+K00799+K14686+K04728+K08738+K00799+K00799+K00799
Metabolism	Lipid metabolism	Ether lipid metabolism	9	22	0.0181836	0.188402	ko00565	LOC105224532(PLA2);LOC105225068(chpt1);LOC105227365(PLA2G12B);LOC105227846(PLPP1);LOC105227847(PLPP3);LOC105227848(PLPP1);LOC105231000(PLPP2);LOC105232554(--);LOC105233389(SELENOI)	K01047+K00993+K01047+K01080+K01080+K01080+K01080+K01047+K00993
Metabolism	Xenobiotics biodegradation and metabolism	Metabolism of xenobiotics by cytochrome P450	19	60	0.0184107	0.188402	ko00980	LOC105224360(MGST1);LOC105224876(Ugt1a2);LOC105225812(GST1);LOC105225994(Gst4);LOC105227725(GST1);LOC105228298(GSTT1);LOC105229681(GST1);LOC105229689(GST1);LOC105229690(GstD1);LOC105230262(UGT8);LOC105230268(Ugt1a1);LOC105230325(ugt3);LOC105230805(UGT2B13);LOC105230828(UGT2B13);LOC105231237(UGT2B15);LOC105232983(Adh);LOC105234081(MGST1);LOC109579500(GST1);MSTRG.6737(GstD1)	K00799+K00699+K00799+K00799+K00799+K00799+K00799+K00799+K00799+K00699+K00699+K00699+K00699+K00699+K00699+K00001+K00799+K00799+K00799
Human Diseases	Cardiovascular diseases	Fluid shear stress and atherosclerosis	23	77	0.0207252	0.205246	ko05418	LOC105224360(MGST1);LOC105224961(KLHL12);LOC105225453(Act57B);LOC105225812(GST1);LOC105225994(Gst4);LOC105226058(RhoL);LOC105226171(Txn2);LOC105226434(Hsp83);LOC105226824(Cp1);LOC105227725(GST1);LOC105228222(Act79B);LOC105228298(GSTT1);LOC105229580(Act88F);LOC105229681(GST1);LOC105229689(GST1);LOC105229690(GstD1);LOC105229889(Act87E);LOC105232205(--);LOC105232524(HSP90B1);LOC105232835(Ctla2a);LOC…	K00799+K10456+K05692+K00799+K00799+K04392+K03671+K04079+K01365+K00799+K05692+K00799+K05692+K00799+K00799+K00799+K05692+K10456+K09487+K01365+K00799+K00799+K00799
Human Diseases	Cancers	Chemical carcinogenesis	18	57	0.022077	0.211801	ko05204	LOC105224360(MGST1);LOC105224876(Ugt1a2);LOC105225812(GST1);LOC105225994(Gst4);LOC105227725(GST1);LOC105228298(GSTT1);LOC105229681(GST1);LOC105229689(GST1);LOC105229690(GstD1);LOC105230262(UGT8);LOC105230268(Ugt1a1);LOC105230325(ugt3);LOC105230805(UGT2B13);LOC105230828(UGT2B13);LOC105231237(UGT2B15);LOC105234081(MGST1);LOC109579500(GST1);MSTRG.6737(GstD1)	K00799+K00699+K00799+K00799+K00799+K00799+K00799+K00799+K00799+K00699+K00699+K00699+K00699+K00699+K00699+K00799+K00799+K00799
Organismal Systems	Digestive system	Protein digestion and absorption	19	62	0.0260299	0.235836	ko04974	LOC105222522(--);LOC105222882(Slc7a9);LOC105223011(yin);LOC105223013(yin);LOC105223014(yin);LOC105223307(--);LOC105223909(Col4a1);LOC105223911(COL4A1);LOC105225162(thetaTry);LOC105225165(ami);LOC105228391(TRYP4);LOC105228392(TRYP3);LOC105229852(SLC3A2);LOC105229913(Slc8a1);LOC105230174(Col1a2);LOC105231156(SLC9A3);LOC105232923(Slc8a3);LOC109579825(thetaTry);MSTRG.3707(--)	K08131+K13868+K14206+K14206+K14206+K01540+K06237+K06237+K01312+K01312+K01312+K01312+K06519+K05849+K19719+K12040+K05849+K01312+K14209
Metabolism	Glycan biosynthesis and metabolism	Mannose type O-glycan biosyntheis	3	4	0.0261186	0.235836	ko00515	LOC105225562(tw);LOC105227401(rt);LOC105228140(gnt14)	K00728+K00728+K21032
Organismal Systems	Endocrine system	Renin-angiotensin system	6	13	0.0279861	0.245478	ko04614	LOC105229185(--);LOC105230937(Anpep);LOC105232276(Acer);LOC105232277(Ance);LOC105232878(ACE);LOC105233746(ANPEP)	K01283+K11140+K01283+K01283+K01283+K11141
Metabolism	Lipid metabolism	Cutin, suberine and wax biosynthesis	5	10	0.0308667	0.256663	ko00073	LOC105222720(wat);LOC105225825(wat);LOC105225838(wat);LOC105226693(far1);LOC105230858(far1)	K13356+K13356+K13356+K13356+K13356
Metabolism	Glycan biosynthesis and metabolism	Glycosphingolipid biosynthesis - ganglio series	4	7	0.0317001	0.256663	ko00604	LOC105225659(GLB1);LOC105226456(Slc33a1);LOC105227151(fdl);LOC105229216(HEXB)	K12309+K03372+K12373+K12373
Organismal Systems	Environmental adaptation	Circadian entrainment	14	43	0.0317694	0.256663	ko04713	LOC105222891(Galphaq);LOC105222892(Galphaq);LOC105222909(Gnaq);LOC105225223(rut);LOC105225576(Adcy9);LOC105229149(Nos);LOC105230055(CG42673);LOC105232029(Gnb5);LOC105232251(Ggamma30A);LOC105232345(Nos);LOC105232516(GUCY1B1);LOC105233100(Grin2b);LOC109579326(Gnaq);LOC109580066(--)	K04634+K04634+K04634+K08041+K08049+K13240+K16513+K04539+K04547+K13240+K12319+K05210+K04634+K05210
Human Diseases	Neurodegenerative diseases	Amyotrophic lateral sclerosis (ALS)	10	28	0.0353328	0.278132	ko05014	LOC105224409(Der-1);LOC105225557(Tom40);LOC105226058(RhoL);LOC105226958(CanA-14F);LOC105229149(Nos);LOC105229497(SOD1);LOC105232345(Nos);LOC105233100(Grin2b);LOC105233538(Cyt-c-p);LOC109580066(--)	K11519+K11518+K04392+K04348+K13240+K04565+K13240+K05210+K08738+K05210
Cellular Processes	Transport and catabolism	Peroxisome	22	77	0.0380591	0.292104	ko04146	LOC105222720(wat);LOC105223314(AAO2);LOC105223876(SCP2);LOC105224676(Hacl1);LOC105224810(Idh1);LOC105225825(wat);LOC105225838(wat);LOC105226309(daao-1);LOC105226631(--);LOC105226693(far1);LOC105228282(Mfe2);LOC105229168(CG5009);LOC105229169(CG5009);LOC105229424(mpv17l);LOC105229497(SOD1);LOC105230858(far1);LOC105233107(MPV17L);LOC105233108(--);LOC105233109(MPV17L2);LOC105233868(At5g27450);LOC1052…	K13356+K00106+K08764+K12261+K00031+K13356+K13356+K00273+K13349+K13356+K12405+K00232+K00232+K13349+K04565+K13356+K13348+K13348+K13348+K00869+K00624+K13348
Organismal Systems	Nervous system	Glutamatergic synapse	13	41	0.0463975	0.347416	ko04724	LOC105222157(HOMER2);LOC105222891(Galphaq);LOC105222892(Galphaq);LOC105222909(Gnaq);LOC105224138(Gs2);LOC105225223(rut);LOC105225576(Adcy9);LOC105226958(CanA-14F);LOC105232029(Gnb5);LOC105232251(Ggamma30A);LOC105233100(Grin2b);LOC109579326(Gnaq);LOC109580066(--)	K15010+K04634+K04634+K04634+K01915+K08041+K08049+K04348+K04539+K04547+K05210+K04634+K05210
Metabolism	Amino acid metabolism	Arginine biosynthesis	6	15	0.0572867	0.409	ko00220	LOC105222926(Gdh);LOC105224138(Gs2);LOC105224406(GOT2);LOC105229149(Nos);LOC105229765(Acy1b);LOC105232345(Nos)	K00261+K01915+K14455+K13240+K14677+K13240
Metabolism	Glycan biosynthesis and metabolism	Glycosaminoglycan degradation	6	15	0.0572867	0.409	ko00531	LOC105222132(SGSH);LOC105224017(Arsb);LOC105225659(GLB1);LOC105227151(fdl);LOC105228814(HGSNAT);LOC105229216(HEXB)	K01565+K01135+K12309+K12373+K10532+K12373
Human Diseases	Cancers	Pathways in cancer	45	184	0.0618784	0.431742	ko05200	LOC105222891(Galphaq);LOC105222892(Galphaq);LOC105222909(Gnaq);LOC105223909(Col4a1);LOC105223911(COL4A1);LOC105223918(smo);LOC105223991(btl);LOC105224360(MGST1);LOC105224558(TGFBR1);LOC105224961(KLHL12);LOC105225090(Lrp6);LOC105225223(rut);LOC105225398(Mtor);LOC105225549(wg);LOC105225576(Adcy9);LOC105225812(GST1);LOC105225994(Gst4);LOC105226058(RhoL);LOC105226202(Wnt5);LOC105226434(Hsp83);LOC1052…	K04634+K04634+K04634+K06237+K06237+K06226+K05093+K00799+K04674+K10456+K03068+K08041+K09291+K03209+K08049+K00799+K00799+K04392+K00444+K04079+K05119+K06627+K00572+K00799+K08734+K00799+K06626+K00799+K00799+K00799+K08268+K04482+K04539+K02157+K10456+K04547+K05637+K09487+K06240+K08738+K00799+K04634+K00799+K01064+K00799
Metabolism	Lipid metabolism	Glycerolipid metabolism	13	43	0.0658583	0.4493	ko00561	LOC105224512(Aldh1b1);LOC105224588(AKR1A1);LOC105224780(GK3P);LOC105227741(NAGA);LOC105227846(PLPP1);LOC105227847(PLPP3);LOC105227848(PLPP1);LOC105228129(Gpat4);LOC105230334(CG34384);LOC105230606(Mboat2);LOC105230785(DGAT1);LOC105231000(PLPP2);LOC105232103(AGPAT1)	K00128+K00002+K00864+K01189+K01080+K01080+K01080+K13506+K00901+K13517+K11155+K01080+K13509
Metabolism	Glycan biosynthesis and metabolism	Other types of O-glycan biosynthesis	5	12	0.0687433	0.458787	ko00514	LOC105224723(GA16561);LOC105225106(Eogt);LOC105225562(tw);LOC105227401(rt);LOC105230239(st6gal2)	K11703+K18134+K00728+K00728+K00778
Environmental Information Processing	Signal transduction	cGMP - PKG signaling pathway	17	61	0.0776617	0.489572	ko04022	LOC105222891(Galphaq);LOC105222892(Galphaq);LOC105222909(Gnaq);LOC105223307(--);LOC105224975(sesB);LOC105225223(rut);LOC105225576(Adcy9);LOC105226958(CanA-14F);LOC105227540(slo);LOC105229794(Mhc);LOC105229913(Slc8a1);LOC105230125(--);LOC105230478(Npr1);LOC105231615(pnr);LOC105232516(GUCY1B1);LOC105232923(Slc8a3);LOC109579326(Gnaq)	K04634+K04634+K04634+K01540+K05863+K08041+K08049+K04348+K04936+K17751+K05849+K12323+K12323+K09183+K12319+K05849+K04634
Human Diseases	Endocrine and metabolic diseases	Cushing syndrome	17	61	0.0776617	0.489572	ko04934	LOC105221964(olf186-F);LOC105222891(Galphaq);LOC105222892(Galphaq);LOC105222909(Gnaq);LOC105223352(trx);LOC105225223(rut);LOC105225549(wg);LOC105225576(Adcy9);LOC105226202(Wnt5);LOC105227549(ash2);LOC105227682(Wnt2);LOC105229096(CycE);LOC105229170(crhr1);LOC105230829(Pde11);LOC105232091(Axn);LOC109579326(Gnaq);LOC115066525(Wnt4)	K16056+K04634+K04634+K04634+K09186+K08041+K03209+K08049+K00444+K14964+K00572+K06626+K04578+K13298+K02157+K04634+K01064
Organismal Systems	Digestive system	Gastric acid secretion	12	40	0.0794097	0.489572	ko04971	LOC105222891(Galphaq);LOC105222892(Galphaq);LOC105222909(Gnaq);LOC105223307(--);LOC105225223(rut);LOC105225453(Act57B);LOC105225576(Adcy9);LOC105226835(mAChR-A);LOC105228222(Act79B);LOC105229580(Act88F);LOC105229889(Act87E);LOC109579326(Gnaq)	K04634+K04634+K04634+K01540+K08041+K05692+K08049+K04131+K05692+K05692+K05692+K04634
Organismal Systems	Endocrine system	Cortisol synthesis and secretion	7	20	0.0811154	0.489572	ko04927	LOC105221964(olf186-F);LOC105222891(Galphaq);LOC105222892(Galphaq);LOC105222909(Gnaq);LOC105225223(rut);LOC105225576(Adcy9);LOC109579326(Gnaq)	K16056+K04634+K04634+K04634+K08041+K08049+K04634
Genetic Information Processing	Folding, sorting and degradation	Protein processing in endoplasmic reticulum	28	110	0.0819838	0.489572	ko04141	LOC105222202(hyou1);LOC105222757(Ost48);LOC105223120(DNAJA2);LOC105223348(STT3B);LOC105224006(Hsc70-1);LOC105224257(Ugt);LOC105224409(Der-1);LOC105224598(Stt3b);LOC105224693(wbl);LOC105224891(LMAN1);LOC105225131(Prkcsh);LOC105225892(DERL2);LOC105226434(Hsp83);LOC105228530(DNAJC3);LOC105228544(TRAM1);LOC105228716(CaBP1);LOC105228793(Ganab);LOC105228809(UBE2G2);LOC105229475(Pdi);LOC105230695(Rpn2);…	K09486+K12670+K09503+K07151+K03283+K11718+K11519+K07151+K09586+K10080+K08288+K13989+K04079+K09523+K14010+K09584+K05546+K04555+K09580+K12667+K14008+K14007+K03283+K09487+K08057+K12666+K10839+K12668
Metabolism	Amino acid metabolism	Alanine, aspartate and glutamate metabolism	8	24	0.0829242	0.489572	ko00250	LOC105222716(Prat);LOC105222926(Gdh);LOC105224138(Gs2);LOC105224253(ALDH4A1);LOC105224406(GOT2);LOC105224871(Gad1);LOC105225623(Prat);LOC105231918(GFPT2)	K00764+K00261+K01915+K00294+K14455+K01580+K00764+K00820
Metabolism	Carbohydrate metabolism	Pentose and glucuronate interconversions	14	49	0.0869632	0.50373	ko00040	LOC105224588(AKR1A1);LOC105224876(Ugt1a2);LOC105224947(Cryl1);LOC105225587(XYLB);LOC105228312(DCXR);LOC105228395(CRYL1);LOC105230262(UGT8);LOC105230268(Ugt1a1);LOC105230325(ugt3);LOC105230508(Rpe);LOC105230805(UGT2B13);LOC105230828(UGT2B13);LOC105231237(UGT2B15);LOC105233418(sgl)	K00002+K00699+K13247+K00854+K03331+K13247+K00699+K00699+K00699+K01783+K00699+K00699+K00699+K00012
Organismal Systems	Immune system	Platelet activation	13	45	0.0900587	0.504233	ko04611	LOC105221964(olf186-F);LOC105222891(Galphaq);LOC105222892(Galphaq);LOC105222909(Gnaq);LOC105225223(rut);LOC105225453(Act57B);LOC105225576(Adcy9);LOC105227172(SSPO);LOC105228222(Act79B);LOC105229580(Act88F);LOC105229889(Act87E);LOC105232516(GUCY1B1);LOC109579326(Gnaq)	K16056+K04634+K04634+K04634+K08041+K05692+K08049+K03900+K05692+K05692+K05692+K12319+K04634
Metabolism	Lipid metabolism	alpha-Linolenic acid metabolism	5	13	0.0942166	0.504233	ko00592	LOC105224532(PLA2);LOC105227365(PLA2G12B);LOC105229168(CG5009);LOC105229169(CG5009);LOC105232554(--)	K01047+K01047+K00232+K00232+K01047
Metabolism	Lipid metabolism	Linoleic acid metabolism	3	6	0.0954803	0.504233	ko00591	LOC105224532(PLA2);LOC105227365(PLA2G12B);LOC105232554(--)	K01047+K01047+K01047
Metabolism	Glycan biosynthesis and metabolism	Glycosphingolipid biosynthesis - globo and isoglobo series	3	6	0.0954803	0.504233	ko00603	LOC105227151(fdl);LOC105227741(NAGA);LOC105229216(HEXB)	K12373+K01189+K12373
Genetic Information Processing	Replication and repair	Non-homologous end-joining	3	6	0.0954803	0.504233	ko03450	LOC105228464(rad50);LOC105229634(Irbp);LOC105233393(Xrcc5)	K10866+K10884+K10885
Human Diseases	Cancers	Hepatocellular carcinoma	24	94	0.0990797	0.504233	ko05225	LOC105224360(MGST1);LOC105224558(TGFBR1);LOC105224961(KLHL12);LOC105225090(Lrp6);LOC105225453(Act57B);LOC105225549(wg);LOC105225812(GST1);LOC105225994(Gst4);LOC105226202(Wnt5);LOC105227682(Wnt2);LOC105227725(GST1);LOC105228222(Act79B);LOC105228298(GSTT1);LOC105229580(Act88F);LOC105229681(GST1);LOC105229689(GST1);LOC105229690(GstD1);LOC105229889(Act87E);LOC105232091(Axn);LOC105232205(--);LOC105234…	K00799+K04674+K10456+K03068+K05692+K03209+K00799+K00799+K00444+K00572+K00799+K05692+K00799+K05692+K00799+K00799+K00799+K05692+K02157+K10456+K00799+K00799+K01064+K00799
Organismal Systems	Sensory system	Taste transduction	6	17	0.0998408	0.504233	ko04742	LOC105224042(Grd);LOC105226835(mAChR-A);LOC105230344(para);LOC105230555(5-HT1A);LOC105232251(Ggamma30A);LOC115065809(Gabbr1)	K05175+K04131+K04834+K04153+K04547+K04615
Metabolism	Lipid metabolism	Primary bile acid biosynthesis	2	3	0.101394	0.504233	ko00120	LOC105223876(SCP2);LOC105228282(Mfe2)	K08764+K12405
Organismal Systems	Digestive system	Mineral absorption	8	25	0.101832	0.504233	ko04978	LOC105221974(slc46a1);LOC105221977(slc46a1);LOC105223307(--);LOC105226955(SCM-2);LOC105229913(Slc8a1);LOC105231062(--);LOC105231156(SLC9A3);LOC105232923(Slc8a3)	K14613+K14613+K01540+K00522+K05849+K14686+K12040+K05849
Organismal Systems	Aging	Longevity regulating pathway - worm	20	77	0.108495	0.5287	ko04212	LOC105222720(wat);LOC105224360(MGST1);LOC105225812(GST1);LOC105225825(wat);LOC105225838(wat);LOC105225994(Gst4);LOC105226693(far1);LOC105227725(GST1);LOC105228298(GSTT1);LOC105229681(GST1);LOC105229689(GST1);LOC105229690(GstD1);LOC105230858(far1);LOC105231787(D11DS);LOC105231797(sima);LOC105233729(Scd1);LOC105234081(MGST1);LOC109579500(GST1);LOC109579509(daf-36);MSTRG.6737(GstD1)	K13356+K00799+K00799+K13356+K13356+K00799+K13356+K00799+K00799+K00799+K00799+K00799+K13356+K00507+K08268+K00507+K00799+K00799+K14938+K00799
Metabolism	Metabolism of cofactors and vitamins	Retinol metabolism	10	34	0.116079	0.556818	ko00830	LOC105224876(Ugt1a2);LOC105229342(Sdr16c6);LOC105230262(UGT8);LOC105230268(Ugt1a1);LOC105230325(ugt3);LOC105230785(DGAT1);LOC105230805(UGT2B13);LOC105230828(UGT2B13);LOC105231237(UGT2B15);LOC105232983(Adh)	K00699+K15734+K00699+K00699+K00699+K11155+K00699+K00699+K00699+K00001
Organismal Systems	Digestive system	Bile secretion	13	47	0.119137	0.560356	ko04976	LOC105223307(--);LOC105223845(Abcb1a);LOC105224876(Ugt1a2);LOC105225223(rut);LOC105225576(Adcy9);LOC105230262(UGT8);LOC105230268(Ugt1a1);LOC105230325(ugt3);LOC105230805(UGT2B13);LOC105230828(UGT2B13);LOC105231156(SLC9A3);LOC105231237(UGT2B15);LOC105231580(l(2)03659)	K01540+K05658+K00699+K08041+K08049+K00699+K00699+K00699+K00699+K00699+K12040+K00699+K05673
Metabolism	Amino acid metabolism	Glycine, serine and threonine metabolism	8	26	0.122935	0.560356	ko00260	LOC105222766(Shmt1);LOC105224361(CBSL);LOC105224599(Gldc);LOC105226309(daao-1);LOC105226796(THA2);LOC105228244(GNMT);LOC105228945(Sardh);LOC105229638(Gld)	K00600+K01697+K00281+K00273+K01620+K00552+K00314+K00108
Metabolism	Lipid metabolism	Sphingolipid metabolism	8	26	0.122935	0.560356	ko00600	LOC105225659(GLB1);LOC105226747(GBA);LOC105227741(NAGA);LOC105227846(PLPP1);LOC105227847(PLPP3);LOC105227848(PLPP1);LOC105231000(PLPP2);LOC105231761(CDase)	K12309+K01201+K01189+K01080+K01080+K01080+K01080+K12349
Genetic Information Processing	Folding, sorting and degradation	Protein export	7	22	0.125227	0.560356	ko03060	LOC105223697(Spase25);LOC105223963(Srp54);LOC105230011(Spase22-23);LOC105231873(Sec11a);LOC105232640(Spase12);LOC105233349(Gtp-bp);MSTRG.1404(Spase22-23)	K12947+K03106+K12948+K13280+K12946+K13431+K12948
Organismal Systems	Immune system	Antigen processing and presentation	6	18	0.125943	0.560356	ko04612	LOC105224006(Hsc70-1);LOC105226434(Hsp83);LOC105226824(Cp1);LOC105231830(Hsc70-2);LOC105232835(Ctla2a);LOC105232867(Calr)	K03283+K04079+K01365+K03283+K01365+K08057
Metabolism	Nucleotide metabolism	Purine metabolism	30	125	0.135001	0.592075	ko00230	LOC105222716(Prat);LOC105223075(Polr1c);LOC105223267(F38B2.4);LOC105223314(AAO2);LOC105223573(RpI135);LOC105224743(Polr3h);LOC105225223(rut);LOC105225576(Adcy9);LOC105225623(Prat);LOC105225781(DhpD);LOC105225795(Pde6);LOC105225953(POLR2H);LOC105226072(Nme7);LOC105226353(ada2);LOC105226786(--);LOC105227488(SPCC285.04);LOC105227970(PNP);LOC105228611(ras);LOC105229025(Aprt);LOC105230125(--);LOC10523…	K00764+K03027+K00939+K00106+K03002+K03022+K08041+K08049+K00764+K01487+K13763+K03016+K00940+K19572+K03005+K07127+K03783+K00088+K00759+K12323+K01769+K12322+K12323+K13298+K00962+K00365+K12319+K19572+K01587+K03004
Metabolism	Amino acid metabolism	Lysine degradation	11	40	0.148962	0.635253	ko00310	LOC105223352(trx);LOC105224305(Set1);LOC105224512(Aldh1b1);LOC105224723(GA16561);LOC105225468(egg);LOC105226084(Su(var)3-9);LOC105228811(Bbox1);LOC105229197(AASS);LOC105232216(SETD3);LOC105232621(ACAT2);MSTRG.9464(--)	K09186+K11422+K00128+K11703+K11421+K11419+K00471+K14157+K19199+K00626+K00471
Environmental Information Processing	Signal transduction	Apelin signaling pathway	13	49	0.153011	0.635253	ko04371	LOC105222891(Galphaq);LOC105222892(Galphaq);LOC105222909(Gnaq);LOC105224558(TGFBR1);LOC105225223(rut);LOC105225576(Adcy9);LOC105229149(Nos);LOC105229913(Slc8a1);LOC105232029(Gnb5);LOC105232251(Ggamma30A);LOC105232345(Nos);LOC105232923(Slc8a3);LOC109579326(Gnaq)	K04634+K04634+K04634+K04674+K08041+K08049+K13240+K05849+K04539+K04547+K13240+K05849+K04634
Metabolism	Lipid metabolism	Fatty acid degradation	10	36	0.156158	0.635253	ko00071	LOC105224512(Aldh1b1);LOC105227875(ACADSB);LOC105229168(CG5009);LOC105229169(CG5009);LOC105231281(CG12262);LOC105232303(bgm);LOC105232304(CG4500);LOC105232306(CG4500);LOC105232621(ACAT2);LOC105232983(Adh)	K00128+K09478+K00232+K00232+K00249+K15013+K15013+K15013+K00626+K00001
Human Diseases	Infectious diseases	Amoebiasis	10	36	0.156158	0.635253	ko05146	LOC105222891(Galphaq);LOC105222892(Galphaq);LOC105222909(Gnaq);LOC105223909(Col4a1);LOC105223911(COL4A1);LOC105225223(rut);LOC105225618(Actn);LOC105232483(Lama1);LOC105232696(LanA);LOC109579326(Gnaq)	K04634+K04634+K04634+K06237+K06237+K08041+K05699+K05637+K06240+K04634
Organismal Systems	Digestive system	Pancreatic secretion	20	81	0.159944	0.635253	ko04972	LOC105222891(Galphaq);LOC105222892(Galphaq);LOC105222909(Gnaq);LOC105223307(--);LOC105224532(PLA2);LOC105224682(Amy-p);LOC105225162(thetaTry);LOC105225165(ami);LOC105225223(rut);LOC105225576(Adcy9);LOC105225976(Slc12a2);LOC105226058(RhoL);LOC105226835(mAChR-A);LOC105227365(PLA2G12B);LOC105227540(slo);LOC105228391(TRYP4);LOC105228392(TRYP3);LOC105232554(--);LOC109579326(Gnaq);LOC109579825(thetaTry)	K04634+K04634+K04634+K01540+K01047+K01176+K01312+K01312+K08041+K08049+K10951+K04392+K04131+K01047+K04936+K01312+K01312+K01047+K04634+K01312
Organismal Systems	Nervous system	Cholinergic synapse	12	45	0.160983	0.635253	ko04725	LOC105222891(Galphaq);LOC105222892(Galphaq);LOC105222909(Gnaq);LOC105225223(rut);LOC105225576(Adcy9);LOC105226835(mAChR-A);LOC105229487(KCNQ5);LOC105229768(ACHE1);LOC105232029(Gnb5);LOC105232251(Ggamma30A);LOC109579326(Gnaq);LOC115066409(--)	K04634+K04634+K04634+K08041+K08049+K04131+K04930+K01049+K04539+K04547+K04634+K04930
Human Diseases	Cancers	Prostate cancer	16	63	0.16291	0.635253	ko05215	LOC105223991(btl);LOC105224360(MGST1);LOC105225577(Pdk1);LOC105225812(GST1);LOC105225994(Gst4);LOC105226434(Hsp83);LOC105227725(GST1);LOC105228298(GSTT1);LOC105229096(CycE);LOC105229681(GST1);LOC105229689(GST1);LOC105229690(GstD1);LOC105232524(HSP90B1);LOC105234081(MGST1);LOC109579500(GST1);MSTRG.6737(GstD1)	K05093+K00799+K06276+K00799+K00799+K04079+K00799+K00799+K06626+K00799+K00799+K00799+K09487+K00799+K00799+K00799
Metabolism	Carbohydrate metabolism	Ascorbate and aldarate metabolism	9	32	0.163627	0.635253	ko00053	LOC105224512(Aldh1b1);LOC105224876(Ugt1a2);LOC105230262(UGT8);LOC105230268(Ugt1a1);LOC105230325(ugt3);LOC105230805(UGT2B13);LOC105230828(UGT2B13);LOC105231237(UGT2B15);LOC105233418(sgl)	K00128+K00699+K00699+K00699+K00699+K00699+K00699+K00699+K00012
Metabolism	Metabolism of terpenoids and polyketides	Terpenoid backbone biosynthesis	9	32	0.163627	0.635253	ko00900	LOC105223819(SDR-1);LOC105223822(SDR-1);LOC105223827(SDR-1);LOC105227882(SDR-1);LOC105227938(SDR-1);LOC105230724(FDPS);LOC105232621(ACAT2);LOC105232728(PDSS2);LOC105233868(At5g27450)	K15890+K15890+K15890+K15890+K15890+K00787+K00626+K12505+K00869
Cellular Processes	Cellular community - eukaryotes	Adherens junction	11	41	0.169456	0.635253	ko04520	LOC105224558(TGFBR1);LOC105225453(Act57B);LOC105225618(Actn);LOC105226058(RhoL);LOC105226349(stp1);LOC105228222(Act79B);LOC105229580(Act88F);LOC105229619(LIMCH1);LOC105229889(Act87E);LOC105233515(Lar);LOC105233791(Wasl)	K04674+K05692+K05699+K04392+K14394+K05692+K05692+K06084+K05692+K05695+K05747
Human Diseases	Infectious diseases	Chagas disease (American trypanosomiasis)	11	41	0.169456	0.635253	ko05142	LOC105222891(Galphaq);LOC105222892(Galphaq);LOC105222909(Gnaq);LOC105224558(TGFBR1);LOC105225223(rut);LOC105229185(--);LOC105232276(Acer);LOC105232277(Ance);LOC105232867(Calr);LOC105232878(ACE);LOC109579326(Gnaq)	K04634+K04634+K04634+K04674+K08041+K01283+K01283+K01283+K08057+K01283+K04634
Metabolism	Lipid metabolism	Steroid hormone biosynthesis	8	28	0.171307	0.635253	ko00140	LOC105224876(Ugt1a2);LOC105230262(UGT8);LOC105230268(Ugt1a1);LOC105230325(ugt3);LOC105230805(UGT2B13);LOC105230828(UGT2B13);LOC105231230(HSDL1);LOC105231237(UGT2B15)	K00699+K00699+K00699+K00699+K00699+K00699+K10251+K00699
Metabolism	Metabolism of other amino acids	Glutathione metabolism	15	59	0.171746	0.635253	ko00480	LOC105224360(MGST1);LOC105224810(Idh1);LOC105225812(GST1);LOC105225994(Gst4);LOC105226750(chac1);LOC105227725(GST1);LOC105228298(GSTT1);LOC105229681(GST1);LOC105229689(GST1);LOC105229690(GstD1);LOC105230937(Anpep);LOC105234081(MGST1);LOC109579500(GST1);LOC115065834(Ggct);MSTRG.6737(GstD1)	K00799+K00031+K00799+K00799+K07232+K00799+K00799+K00799+K00799+K00799+K11140+K00799+K00799+K00682+K00799
Metabolism	Metabolism of cofactors and vitamins	Biotin metabolism	2	4	0.17667	0.645686	ko00780	LOC105232645(vanin-like);LOC105234158(Oxsm)	K01435+K09458
Human Diseases	Cancers	Gastric cancer	11	42	0.191236	0.680796	ko05226	LOC105223845(Abcb1a);LOC105223991(btl);LOC105224558(TGFBR1);LOC105225090(Lrp6);LOC105225549(wg);LOC105226202(Wnt5);LOC105227682(Wnt2);LOC105228073(MLH1);LOC105229096(CycE);LOC105232091(Axn);LOC115066525(Wnt4)	K05658+K05093+K04674+K03068+K03209+K00444+K00572+K08734+K06626+K02157+K01064
Cellular Processes	Transport and catabolism	Phagosome	18	74	0.193959	0.680796	ko04145	LOC105222583(thbs3a);LOC105223306(LAMP1);LOC105225453(Act57B);LOC105226058(RhoL);LOC105226824(Cp1);LOC105226868(betaTub56D);LOC105227818(ATP6V0A1);LOC105228222(Act79B);LOC105229149(Nos);LOC105229580(Act88F);LOC105229889(Act87E);LOC105231750(Atp6v0a1);LOC105232161(Vha13);LOC105232345(Nos);LOC105232619(alphaTub67C);LOC105232835(Ctla2a);LOC105232867(Calr);LOC105234137(Hrs)	K04659+K06528+K05692+K04392+K01365+K07375+K02154+K05692+K13240+K05692+K05692+K02154+K02152+K13240+K07374+K01365+K08057+K12182
Metabolism	Lipid metabolism	Steroid biosynthesis	3	8	0.197101	0.680796	ko00100	LOC105223844(Soat1);LOC105224194(Lip1);LOC105224212(Lip1)	K00637+K01052+K01052
Human Diseases	Immune diseases	Systemic lupus erythematosus	3	8	0.197101	0.680796	ko05322	LOC105225618(Actn);LOC105233100(Grin2b);LOC109580066(--)	K05699+K05210+K05210
Metabolism	Metabolism of other amino acids	D-Arginine and D-ornithine metabolism	1	1	0.197364	0.680796	ko00472	LOC105226309(daao-1)	K00273
Human Diseases	Cancers	Proteoglycans in cancer	23	98	0.205444	0.700791	ko05205	LOC105222537(Ddx17);LOC105223918(smo);LOC105224057(CD63);LOC105225453(Act57B);LOC105225549(wg);LOC105225577(Pdk1);LOC105226058(RhoL);LOC105226202(Wnt5);LOC105226824(Cp1);LOC105227682(Wnt2);LOC105227766(Cd53);LOC105227769(Cd63);LOC105228222(Act79B);LOC105228820(Ddx17);LOC105229580(Act88F);LOC105229889(Act87E);LOC105230099(Rm62);LOC105231797(sima);LOC105232048(csw);LOC105232835(Ctla2a);LOC109579903…	K12823+K06226+K06497+K05692+K03209+K06276+K04392+K00444+K01365+K00572+K06497+K06497+K05692+K12823+K05692+K05692+K12823+K08268+K07293+K01365+K10380+K10380+K01064
Human Diseases	Cancers	Basal cell carcinoma	6	21	0.220539	0.744017	ko05217	LOC105223918(smo);LOC105225549(wg);LOC105226202(Wnt5);LOC105227682(Wnt2);LOC105232091(Axn);LOC115066525(Wnt4)	K06226+K03209+K00444+K00572+K02157+K01064
Metabolism	Lipid metabolism	Biosynthesis of unsaturated fatty acids	5	17	0.232436	0.757662	ko01040	LOC105229168(CG5009);LOC105229169(CG5009);LOC105231230(HSDL1);LOC105231787(D11DS);LOC105233729(Scd1)	K00232+K00232+K10251+K00507+K00507
Genetic Information Processing	Replication and repair	Base excision repair	5	17	0.232436	0.757662	ko03410	LOC105225759(TDG);LOC105225823(LIG3);LOC105226860(DNA-ligI);LOC105228822(Dsp1);LOC105230173(Rrp1)	K20813+K10776+K10747+K10802+K10771
Organismal Systems	Digestive system	Vitamin digestion and absorption	5	17	0.232436	0.757662	ko04977	LOC105221974(slc46a1);LOC105221977(slc46a1);LOC105225580(Cubn);LOC105226014(SLC19A2);LOC105232645(vanin-like)	K14613+K14613+K14616+K14610+K01435
Organismal Systems	Endocrine system	Aldosterone synthesis and secretion	11	44	0.238249	0.757662	ko04925	LOC105221964(olf186-F);LOC105222891(Galphaq);LOC105222892(Galphaq);LOC105222909(Gnaq);LOC105223307(--);LOC105225223(rut);LOC105225576(Adcy9);LOC105228248(Dagla);LOC105230125(--);LOC105230478(Npr1);LOC109579326(Gnaq)	K16056+K04634+K04634+K04634+K01540+K08041+K08049+K13806+K12323+K12323+K04634
Organismal Systems	Excretory system	Endocrine and other factor-regulated calcium reabsorption	9	35	0.2412	0.757662	ko04961	LOC105222891(Galphaq);LOC105222892(Galphaq);LOC105222909(Gnaq);LOC105223307(--);LOC105224296(Trpv5);LOC105225576(Adcy9);LOC105229913(Slc8a1);LOC105232923(Slc8a3);LOC109579326(Gnaq)	K04634+K04634+K04634+K01540+K04974+K08049+K05849+K05849+K04634
Organismal Systems	Digestive system	Salivary secretion	14	58	0.241803	0.757662	ko04970	LOC105222891(Galphaq);LOC105222892(Galphaq);LOC105222909(Gnaq);LOC105223307(--);LOC105224682(Amy-p);LOC105225223(rut);LOC105225576(Adcy9);LOC105225976(Slc12a2);LOC105226835(mAChR-A);LOC105227540(slo);LOC105229149(Nos);LOC105232345(Nos);LOC105232516(GUCY1B1);LOC109579326(Gnaq)	K04634+K04634+K04634+K01540+K01176+K08041+K08049+K10951+K04131+K04936+K13240+K13240+K12319+K04634
Environmental Information Processing	Membrane transport	ABC transporters	4	13	0.244328	0.757662	ko02010	LOC105222965(ABCA3);LOC105223845(Abcb1a);LOC105230756(ABCG1);LOC105231580(l(2)03659)	K05643+K05658+K05679+K05673
Organismal Systems	Excretory system	Proximal tubule bicarbonate reclamation	4	13	0.244328	0.757662	ko04964	LOC105222926(Gdh);LOC105223307(--);LOC105231156(SLC9A3);LOC105232191(Pepck)	K00261+K01540+K12040+K01596
Organismal Systems	Nervous system	GABAergic synapse	10	40	0.253145	0.759428	ko04727	LOC105224042(Grd);LOC105224138(Gs2);LOC105224871(Gad1);LOC105225223(rut);LOC105225576(Adcy9);LOC105226961(comt);LOC105228157(SLC12A6);LOC105232029(Gnb5);LOC105232251(Ggamma30A);LOC115065809(Gabbr1)	K05175+K01915+K01580+K08041+K08049+K06027+K14427+K04539+K04547+K04615
Metabolism	Metabolism of other amino acids	Taurine and hypotaurine metabolism	3	9	0.254692	0.759428	ko00430	LOC105224871(Gad1);LOC105228941(cdo1);LOC105229437(Csad)	K01580+K00456+K01594
Human Diseases	Substance dependence	Nicotine addiction	3	9	0.254692	0.759428	ko05033	LOC105224042(Grd);LOC105233100(Grin2b);LOC109580066(--)	K05175+K05210+K05210
Cellular Processes	Cell growth and death	p53 signaling pathway	6	22	0.256281	0.759428	ko04115	LOC105223735(lok);LOC105229096(CycE);LOC105229679(CycB);LOC105233045(tefu);LOC105233538(Cyt-c-p);LOC105233949(Rchy1)	K06641+K06626+K21770+K04728+K08738+K10144
Metabolism	Metabolism of other amino acids	Phosphonate and phosphinate metabolism	2	5	0.257265	0.759428	ko00440	LOC105225068(chpt1);LOC105233389(SELENOI)	K00993+K00993
Organismal Systems	Circulatory system	Cardiac muscle contraction	9	36	0.269548	0.788107	ko04260	LOC105223307(--);LOC105226068(COX5A);LOC105226581(Tm2);LOC105226582(Tm1);LOC105229794(Mhc);LOC105229913(Slc8a1);LOC105229962(COX7C);LOC105231331(CACNA2D3);LOC105232923(Slc8a3)	K01540+K02264+K10374+K10373+K17751+K05849+K02272+K04860+K05849
Organismal Systems	Endocrine system	Oxytocin signaling pathway	15	65	0.291908	0.845432	ko04921	LOC105222891(Galphaq);LOC105222892(Galphaq);LOC105222909(Gnaq);LOC105225223(rut);LOC105225453(Act57B);LOC105225576(Adcy9);LOC105226958(CanA-14F);LOC105228222(Act79B);LOC105229580(Act88F);LOC105229889(Act87E);LOC105230125(--);LOC105230478(Npr1);LOC105231331(CACNA2D3);LOC105232516(GUCY1B1);LOC109579326(Gnaq)	K04634+K04634+K04634+K08041+K05692+K08049+K04348+K05692+K05692+K05692+K12323+K12323+K04860+K12319+K04634
Cellular Processes	Cell growth and death	Apoptosis - multiple species	5	19	0.315686	0.905753	ko04215	LOC105224480(Dronc);LOC105227461(Sept4);LOC105229787(HtrA2);LOC105229816(wgn);LOC105233538(Cyt-c-p)	K20009+K16943+K08669+K16679+K08738
Metabolism	Global and overview maps	Biosynthesis of amino acids	13	57	0.327695	0.910653	ko01230	LOC105222232(Gapdh);LOC105222766(Shmt1);LOC105224138(Gs2);LOC105224260(Aldh18a1);LOC105224361(CBSL);LOC105224406(GOT2);LOC105224810(Idh1);LOC105226796(THA2);LOC105229143(Tktl2);LOC105229765(Acy1b);LOC105230177(Rpia);LOC105230508(Rpe);LOC105233770(PYCR1)	K00134+K00600+K01915+K12657+K01697+K14455+K00031+K01620+K00615+K14677+K01807+K01783+K00286
Environmental Information Processing	Signal transduction	Hippo signaling pathway -fly	13	57	0.327695	0.910653	ko04391	LOC105223481(HMCN1);LOC105223592(ds);LOC105225045(RERE);LOC105225453(Act57B);LOC105225549(wg);LOC105228222(Act79B);LOC105229096(CycE);LOC105229262(ex);LOC105229580(Act88F);LOC105229816(wgn);LOC105229889(Act87E);LOC105233721(vn);LOC115065999(dlg1)	K16680+K16507+K05628+K05692+K03209+K05692+K06626+K16683+K05692+K16679+K05692+K16690+K12076
Human Diseases	Infectious diseases	Pathogenic Escherichia coli infection	9	38	0.328822	0.910653	ko05130	LOC105225453(Act57B);LOC105226868(betaTub56D);LOC105227022(mod);LOC105228222(Act79B);LOC105229580(Act88F);LOC105229889(Act87E);LOC105232619(alphaTub67C);LOC105232633(--);LOC105233791(Wasl)	K05692+K07375+K11294+K05692+K05692+K05692+K07374+K11294+K05747
Metabolism	Biosynthesis of other secondary metabolites	Caffeine metabolism	2	6	0.338158	0.910653	ko00232	LOC105223314(AAO2);LOC105231184(Uro)	K00106+K00365
Metabolism	Amino acid metabolism	Phenylalanine metabolism	2	6	0.338158	0.910653	ko00360	LOC105224406(GOT2);LOC105224730(Hpd)	K14455+K00457
Metabolism	Metabolism of cofactors and vitamins	Vitamin B6 metabolism	2	6	0.338158	0.910653	ko00750	LOC105230296(PNPO);LOC105230407(phospho2)	K00275+K13248
Metabolism	Energy metabolism	Sulfur metabolism	2	6	0.338158	0.910653	ko00920	LOC105228313(CG7280);LOC105233496(--)	K00387+K17725
Organismal Systems	Circulatory system	Adrenergic signaling in cardiomyocytes	13	58	0.352508	0.925393	ko04261	LOC105222891(Galphaq);LOC105222892(Galphaq);LOC105222909(Gnaq);LOC105223307(--);LOC105225223(rut);LOC105225576(Adcy9);LOC105226581(Tm2);LOC105226582(Tm1);LOC105229794(Mhc);LOC105229913(Slc8a1);LOC105231331(CACNA2D3);LOC105232923(Slc8a3);LOC109579326(Gnaq)	K04634+K04634+K04634+K01540+K08041+K08049+K10374+K10373+K17751+K05849+K04860+K05849+K04634
Metabolism	Metabolism of other amino acids	D-Glutamine and D-glutamate metabolism	1	2	0.355825	0.925393	ko00471	LOC105222926(Gdh)	K00261
Human Diseases	Immune diseases	Primary immunodeficiency	1	2	0.355825	0.925393	ko05340	LOC105221964(olf186-F)	K16056
Environmental Information Processing	Signal transduction	Calcium signaling pathway	14	63	0.356491	0.925393	ko04020	LOC105221964(olf186-F);LOC105222891(Galphaq);LOC105222892(Galphaq);LOC105222909(Gnaq);LOC105224975(sesB);LOC105225223(rut);LOC105225576(Adcy9);LOC105226835(mAChR-A);LOC105226958(CanA-14F);LOC105229149(Nos);LOC105229913(Slc8a1);LOC105232345(Nos);LOC105232923(Slc8a3);LOC109579326(Gnaq)	K16056+K04634+K04634+K04634+K05863+K08041+K08049+K04131+K04348+K13240+K05849+K13240+K05849+K04634
Metabolism	Carbohydrate metabolism	Pentose phosphate pathway	5	20	0.358703	0.925393	ko00030	LOC105222689(Gld);LOC105228097(Pgi);LOC105229143(Tktl2);LOC105230177(Rpia);LOC105230508(Rpe)	K00115+K01810+K00615+K01807+K01783
Cellular Processes	Cell growth and death	Ferroptosis	3	11	0.37383	0.956383	ko04216	LOC105222526(nes);LOC105226955(SCM-2);LOC105229852(SLC3A2)	K13515+K00522+K06519
Organismal Systems	Circulatory system	Vascular smooth muscle contraction	13	59	0.377634	0.95813	ko04270	LOC105222891(Galphaq);LOC105222892(Galphaq);LOC105222909(Gnaq);LOC105224532(PLA2);LOC105225223(rut);LOC105225576(Adcy9);LOC105227365(PLA2G12B);LOC105227540(slo);LOC105230125(--);LOC105230478(Npr1);LOC105232516(GUCY1B1);LOC105232554(--);LOC109579326(Gnaq)	K04634+K04634+K04634+K01047+K08041+K08049+K01047+K04936+K12323+K12323+K12319+K01047+K04634
Organismal Systems	Nervous system	Long-term depression	8	35	0.385078	0.969007	ko04730	LOC105222891(Galphaq);LOC105222892(Galphaq);LOC105222909(Gnaq);LOC105229149(Nos);LOC105229170(crhr1);LOC105232345(Nos);LOC105232516(GUCY1B1);LOC109579326(Gnaq)	K04634+K04634+K04634+K13240+K04578+K13240+K12319+K04634
Metabolism	Energy metabolism	Nitrogen metabolism	4	16	0.391294	0.976644	ko00910	LOC105222926(Gdh);LOC105224138(Gs2);LOC105224587(--);LOC105234179(Ca2)	K00261+K01915+K01672+K01672
Human Diseases	Cancers	Choline metabolism in cancer	12	55	0.400547	0.991676	ko05231	LOC105224472(CG1311);LOC105225577(Pdk1);LOC105226058(RhoL);LOC105226287(Orct);LOC105227846(PLPP1);LOC105227847(PLPP3);LOC105227848(PLPP1);LOC105230334(CG34384);LOC105231000(PLPP2);LOC105231741(Orct2);LOC105231797(sima);LOC105233791(Wasl)	K06515+K06276+K04392+K08202+K01080+K01080+K01080+K00901+K01080+K08202+K08268+K05747
Metabolism	Amino acid metabolism	Histidine metabolism	2	7	0.416095	1	ko00340	LOC105224512(Aldh1b1);LOC105232128(CG11596)	K00128+K19787
Organismal Systems	Endocrine system	Melanogenesis	10	46	0.423521	1	ko04916	LOC105222891(Galphaq);LOC105222892(Galphaq);LOC105222909(Gnaq);LOC105225223(rut);LOC105225549(wg);LOC105225576(Adcy9);LOC105226202(Wnt5);LOC105227682(Wnt2);LOC109579326(Gnaq);LOC115066525(Wnt4)	K04634+K04634+K04634+K08041+K03209+K08049+K00444+K00572+K04634+K01064
Human Diseases	Cancers	Transcriptional misregulation in cancers	11	51	0.42547	1	ko05202	LOC105221788(--);LOC105222537(Ddx17);LOC105223352(trx);LOC105224398(prd);LOC105227140(cdk14);LOC105227418(CycA);LOC105228744(aop);LOC105228820(Ddx17);LOC105230099(Rm62);LOC105233045(tefu);LOC105233575(Kdm6a)	K06571+K12823+K09186+K09381+K08821+K06627+K03211+K12823+K12823+K04728+K11447
Organismal Systems	Digestive system	Cholesterol metabolism	4	17	0.440173	1	ko04979	LOC105223844(Soat1);LOC105224194(Lip1);LOC105224212(Lip1);LOC105226761(--)	K00637+K01052+K01052+K13443
Human Diseases	Neurodegenerative diseases	Prion diseases	4	17	0.440173	1	ko05020	LOC105223913(STIP1);LOC105224006(Hsc70-1);LOC105229497(SOD1);LOC105231830(Hsc70-2)	K09553+K03283+K04565+K03283
Human Diseases	Infectious diseases	African trypanosomiasis	4	17	0.440173	1	ko05143	LOC105222891(Galphaq);LOC105222892(Galphaq);LOC105222909(Gnaq);LOC109579326(Gnaq)	K04634+K04634+K04634+K04634
Metabolism	Carbohydrate metabolism	Glyoxylate and dicarboxylate metabolism	7	32	0.449594	1	ko00630	LOC105221826(KFase);LOC105222766(Shmt1);LOC105224026(PGP);LOC105224138(Gs2);LOC105224599(Gldc);LOC105227980(AcCoAS);LOC105232621(ACAT2)	K01432+K00600+K19269+K01915+K00281+K01895+K00626
Human Diseases	Infectious diseases	Bacterial invasion of epithelial cells	7	32	0.449594	1	ko05100	LOC105225453(Act57B);LOC105226058(RhoL);LOC105228222(Act79B);LOC105229580(Act88F);LOC105229889(Act87E);LOC105230219(--);LOC105233791(Wasl)	K05692+K04392+K05692+K05692+K05692+K13728+K05747
Organismal Systems	Endocrine system	Thyroid hormone synthesis	8	37	0.450986	1	ko04918	LOC105222891(Galphaq);LOC105222892(Galphaq);LOC105222909(Gnaq);LOC105223307(--);LOC105225223(rut);LOC105225576(Adcy9);LOC105232524(HSP90B1);LOC109579326(Gnaq)	K04634+K04634+K04634+K01540+K08041+K08049+K09487+K04634
Organismal Systems	Endocrine system	Insulin secretion	11	52	0.45321	1	ko04911	LOC105222612(Snap25);LOC105222891(Galphaq);LOC105222892(Galphaq);LOC105222909(Gnaq);LOC105223307(--);LOC105225223(rut);LOC105225576(Adcy9);LOC105226835(mAChR-A);LOC105227540(slo);LOC105230845(Rims1);LOC109579326(Gnaq)	K18211+K04634+K04634+K04634+K01540+K08041+K08049+K04131+K04936+K15297+K04634
Environmental Information Processing	Signal transduction	Rap1 signaling pathway	14	68	0.478306	1	ko04015	LOC105222891(Galphaq);LOC105222892(Galphaq);LOC105222909(Gnaq);LOC105223991(btl);LOC105225223(rut);LOC105225453(Act57B);LOC105225576(Adcy9);LOC105226058(RhoL);LOC105228222(Act79B);LOC105229580(Act88F);LOC105229889(Act87E);LOC105233100(Grin2b);LOC109579326(Gnaq);LOC109580066(--)	K04634+K04634+K04634+K05093+K08041+K05692+K08049+K04392+K05692+K05692+K05692+K05210+K04634+K05210
Cellular Processes	Cell growth and death	Apoptosis	12	58	0.47993	1	ko04210	LOC105225453(Act57B);LOC105225577(Pdk1);LOC105226824(Cp1);LOC105227461(Sept4);LOC105228222(Act79B);LOC105229580(Act88F);LOC105229787(HtrA2);LOC105229889(Act87E);LOC105232619(alphaTub67C);LOC105232835(Ctla2a);LOC105233045(tefu);LOC105233538(Cyt-c-p)	K05692+K06276+K01365+K16943+K05692+K05692+K08669+K05692+K07374+K01365+K04728+K08738
Organismal Systems	Endocrine system	Estrogen signaling pathway	11	53	0.480785	1	ko04915	LOC105222891(Galphaq);LOC105222892(Galphaq);LOC105222909(Gnaq);LOC105224006(Hsc70-1);LOC105225223(rut);LOC105225576(Adcy9);LOC105226434(Hsp83);LOC105231830(Hsc70-2);LOC105232524(HSP90B1);LOC109579326(Gnaq);LOC115065809(Gabbr1)	K04634+K04634+K04634+K03283+K08041+K08049+K04079+K03283+K09487+K04634+K04615
Metabolism	Amino acid metabolism	Cysteine and methionine metabolism	7	33	0.484573	1	ko00270	LOC105223108(HMT-1);LOC105224130(Ahcy13);LOC105224361(CBSL);LOC105224406(GOT2);LOC105225053(AHCYL2);LOC105228941(cdo1);LOC105231405(ImpL3)	K00547+K01251+K01697+K14455+K01251+K00456+K00016
Genetic Information Processing	Transcription	RNA polymerase	6	28	0.485628	1	ko03020	LOC105223075(Polr1c);LOC105223573(RpI135);LOC105224743(Polr3h);LOC105225953(POLR2H);LOC105226786(--);LOC105233593(--)	K03027+K03002+K03022+K03016+K03005+K03004
Human Diseases	Cancers	Small cell lung cancer	6	28	0.485628	1	ko05222	LOC105223909(Col4a1);LOC105223911(COL4A1);LOC105229096(CycE);LOC105232483(Lama1);LOC105232696(LanA);LOC105233538(Cyt-c-p)	K06237+K06237+K06626+K05637+K06240+K08738
Metabolism	Metabolism of cofactors and vitamins	Pantothenate and CoA biosynthesis	3	13	0.488814	1	ko00770	LOC105227635(Ppcs);LOC105227904(PANK1);LOC105232140(vanin-like)	K01922+K09680+K08069
Human Diseases	Endocrine and metabolic diseases	Type I diabetes mellitus	2	8	0.489093	1	ko04940	LOC105224871(Gad1);LOC105233765(Ptprn2)	K01580+K07817
Cellular Processes	Cellular community - eukaryotes	Focal adhesion	15	74	0.500895	1	ko04510	LOC105222522(--);LOC105222583(thbs3a);LOC105223909(Col4a1);LOC105223911(COL4A1);LOC105225453(Act57B);LOC105225577(Pdk1);LOC105225618(Actn);LOC105226058(RhoL);LOC105227172(SSPO);LOC105228222(Act79B);LOC105229580(Act88F);LOC105229889(Act87E);LOC105230174(Col1a2);LOC105232483(Lama1);LOC105232696(LanA)	K08131+K04659+K06237+K06237+K05692+K06276+K05699+K04392+K03900+K05692+K05692+K05692+K19719+K05637+K06240
Cellular Processes	Cell growth and death	Apoptosis - fly	10	49	0.510301	1	ko04214	LOC105224480(Dronc);LOC105225038(PRDX4);LOC105225270(Eip74EF);LOC105226312(EcR);LOC105226319(--);LOC105226331(Mblk-1);LOC105229787(HtrA2);LOC105229816(wgn);LOC105233045(tefu);LOC105233538(Cyt-c-p)	K20009+K03386+K09428+K14034+K20010+K20015+K08669+K16679+K04728+K08738
Metabolism	Amino acid metabolism	Tryptophan metabolism	4	19	0.533728	1	ko00380	LOC105221826(KFase);LOC105224512(Aldh1b1);LOC105228982(cn);LOC105232621(ACAT2)	K01432+K00128+K00486+K00626
Metabolism	Lipid metabolism	Arachidonic acid metabolism	3	14	0.542341	1	ko00590	LOC105224532(PLA2);LOC105227365(PLA2G12B);LOC105232554(--)	K01047+K01047+K01047
Human Diseases	Infectious diseases	Shigellosis	7	35	0.552348	1	ko05131	LOC105225453(Act57B);LOC105226058(RhoL);LOC105228222(Act79B);LOC105229580(Act88F);LOC105229889(Act87E);LOC105230219(--);LOC105233791(Wasl)	K05692+K04392+K05692+K05692+K05692+K13728+K05747
Cellular Processes	Cell growth and death	Cellular senescence	13	66	0.553391	1	ko04218	LOC105223735(lok);LOC105224558(TGFBR1);LOC105224975(sesB);LOC105226958(CanA-14F);LOC105227418(CycA);LOC105228464(rad50);LOC105228807(MAPk-Ak2);LOC105229096(CycE);LOC105229679(CycB);LOC105231615(pnr);LOC105231705(CycB3);LOC105233045(tefu);LOC105234013(HIPK2)	K06641+K04674+K05863+K04348+K06627+K10866+K04443+K06626+K21770+K09183+K21771+K04728+K08826
Organismal Systems	Immune system	Hematopoietic cell lineage	2	9	0.556065	1	ko04640	LOC105226431(--);LOC105230937(Anpep)	K04008+K11140
Organismal Systems	Endocrine system	Adipocytokine signaling pathway	5	25	0.56689	1	ko04920	LOC105232048(csw);LOC105232191(Pepck);LOC105232303(bgm);LOC105232304(CG4500);LOC105232306(CG4500)	K07293+K01596+K15013+K15013+K15013
Metabolism	Carbohydrate metabolism	Propanoate metabolism	4	20	0.577484	1	ko00640	LOC105227980(AcCoAS);LOC105231281(CG12262);LOC105231405(ImpL3);LOC105232621(ACAT2)	K01895+K00249+K00016+K00626
Human Diseases	Drug resistance	Antifolate resistance	4	20	0.577484	1	ko01523	LOC105221974(slc46a1);LOC105221977(slc46a1);LOC105222766(Shmt1);LOC105231580(l(2)03659)	K14613+K14613+K00600+K05673
Organismal Systems	Immune system	Leukocyte transendothelial migration	7	36	0.584757	1	ko04670	LOC105225453(Act57B);LOC105225618(Actn);LOC105226058(RhoL);LOC105228222(Act79B);LOC105229580(Act88F);LOC105229889(Act87E);LOC105232048(csw)	K05692+K05699+K04392+K05692+K05692+K05692+K07293
Metabolism	Amino acid metabolism	Phenylalanine, tyrosine and tryptophan biosynthesis	1	4	0.585163	1	ko00400	LOC105224406(GOT2)	K14455
Organismal Systems	Sensory system	Phototransduction	1	4	0.585163	1	ko04744	LOC105230331(Gucy2f)	K12322
Human Diseases	Infectious diseases	Legionellosis	6	31	0.593524	1	ko05134	LOC105224006(Hsc70-1);LOC105227188(--);LOC105228314(Arid4b);LOC105230873(Ef1alpha100E);LOC105231830(Hsc70-2);LOC105233538(Cyt-c-p)	K03283+K15464+K07874+K03231+K03283+K08738
Organismal Systems	Nervous system	Long-term potentiation	8	42	0.607033	1	ko04720	LOC105222891(Galphaq);LOC105222892(Galphaq);LOC105222909(Gnaq);LOC105225223(rut);LOC105226958(CanA-14F);LOC105233100(Grin2b);LOC109579326(Gnaq);LOC109580066(--)	K04634+K04634+K04634+K08041+K04348+K05210+K04634+K05210
Organismal Systems	Endocrine system	Parathyroid hormone synthesis, secretion and action	8	42	0.607033	1	ko04928	LOC105222891(Galphaq);LOC105222892(Galphaq);LOC105222909(Gnaq);LOC105224296(Trpv5);LOC105225090(Lrp6);LOC105225223(rut);LOC105225576(Adcy9);LOC109579326(Gnaq)	K04634+K04634+K04634+K04974+K03068+K08041+K08049+K04634
Metabolism	Metabolism of cofactors and vitamins	Ubiquinone and other terpenoid-quinone biosynthesis	2	10	0.616543	1	ko00130	LOC105224730(Hpd);LOC105231061(Coq2)	K00457+K06125
Organismal Systems	Nervous system	Serotonergic synapse	8	43	0.635475	1	ko04726	LOC105222891(Galphaq);LOC105222892(Galphaq);LOC105222909(Gnaq);LOC105223854(SerT);LOC105230555(5-HT1A);LOC105232029(Gnb5);LOC105232251(Ggamma30A);LOC109579326(Gnaq)	K04634+K04634+K04634+K05037+K04153+K04539+K04547+K04634
Metabolism	Lipid metabolism	Fatty acid elongation	3	16	0.638894	1	ko00062	LOC105224915(Ppt1);LOC105225208(eloF);LOC105231230(HSDL1)	K01074+K10249+K10251
Metabolism	Global and overview maps	2-Oxocarboxylic acid metabolism	3	16	0.638894	1	ko01210	LOC105224406(GOT2);LOC105224810(Idh1);LOC105229765(Acy1b)	K14455+K00031+K14677
Organismal Systems	Sensory system	Olfactory transduction	3	16	0.638894	1	ko04740	LOC105229913(Slc8a1);LOC105232251(Ggamma30A);LOC105232923(Slc8a3)	K05849+K04547+K05849
Genetic Information Processing	Replication and repair	Fanconi anemia pathway	5	27	0.640125	1	ko03460	LOC105223535(mei-9);LOC105225284(UBC37);LOC105228073(MLH1);LOC105228187(FANCM);LOC105231800(RAD51)	K10848+K13960+K08734+K10896+K04482
Human Diseases	Substance dependence	Morphine addiction	7	38	0.645868	1	ko05032	LOC105224042(Grd);LOC105225223(rut);LOC105225576(Adcy9);LOC105230829(Pde11);LOC105232029(Gnb5);LOC105232251(Ggamma30A);LOC115065809(Gabbr1)	K05175+K08041+K08049+K13298+K04539+K04547+K04615
Human Diseases	Neurodegenerative diseases	Alzheimer disease	23	123	0.652357	1	ko05010	LOC105222232(Gapdh);LOC105222891(Galphaq);LOC105222892(Galphaq);LOC105222909(Gnaq);LOC105223190(sun);LOC105224069(--);LOC105226068(COX5A);LOC105226732(SdhD);LOC105226958(CanA-14F);LOC105227131(NDUFB5);LOC105227909(Ide);LOC105228673(SdhA);LOC105229149(Nos);LOC105229678(blw);LOC105229962(COX7C);LOC105232345(Nos);LOC105232504(ATP5MC2);LOC105232863(ND-ACP);LOC105233100(Grin2b);LOC105233538(Cyt-c-p);L…	K00134+K04634+K04634+K04634+K02135+K11716+K02264+K00237+K04348+K03961+K01408+K00234+K13240+K02132+K02272+K13240+K02128+K03955+K05210+K08738+K04380+K04634+K05210
Cellular Processes	Cellular community - eukaryotes	Gap junction	9	49	0.652787	1	ko04540	LOC105222891(Galphaq);LOC105222892(Galphaq);LOC105222909(Gnaq);LOC105225223(rut);LOC105225576(Adcy9);LOC105226868(betaTub56D);LOC105232516(GUCY1B1);LOC105232619(alphaTub67C);LOC109579326(Gnaq)	K04634+K04634+K04634+K08041+K08049+K07375+K12319+K07374+K04634
Organismal Systems	Development	Axon guidance	11	60	0.659987	1	ko04360	LOC105221897(trp);LOC105223918(smo);LOC105226058(RhoL);LOC105226202(Wnt5);LOC105226958(CanA-14F);LOC105227075(--);LOC105228136(SRGAP1);LOC105228810(NetA);LOC105228861(NetB);LOC105232048(csw);LOC109579448(--)	K04967+K06226+K04392+K00444+K04348+K05463+K07526+K06843+K06843+K07293+K07525
Environmental Information Processing	Signal transduction	cAMP signaling pathway	14	76	0.660473	1	ko04024	LOC105221964(olf186-F);LOC105223307(--);LOC105225223(rut);LOC105225576(Adcy9);LOC105226058(RhoL);LOC105229168(CG5009);LOC105229169(CG5009);LOC105230125(--);LOC105230478(Npr1);LOC105230555(5-HT1A);LOC105231580(l(2)03659);LOC105233100(Grin2b);LOC109580066(--);LOC115065809(Gabbr1)	K16056+K01540+K08041+K08049+K04392+K00232+K00232+K12323+K12323+K04153+K05673+K05210+K05210+K04615
Metabolism	Metabolism of cofactors and vitamins	Porphyrin and chlorophyll metabolism	8	44	0.662738	1	ko00860	LOC105224876(Ugt1a2);LOC105227538(Ppox);LOC105230262(UGT8);LOC105230268(Ugt1a1);LOC105230325(ugt3);LOC105230805(UGT2B13);LOC105230828(UGT2B13);LOC105231237(UGT2B15)	K00699+K00231+K00699+K00699+K00699+K00699+K00699+K00699
Metabolism	Nucleotide metabolism	Pyrimidine metabolism	14	77	0.680731	1	ko00240	LOC105223075(Polr1c);LOC105223573(RpI135);LOC105223978(--);LOC105223979(CTPsyn);LOC105224743(Polr3h);LOC105225953(POLR2H);LOC105226045(UPP1);LOC105226072(Nme7);LOC105226786(--);LOC105227970(PNP);LOC105231012(PNPT1);LOC105231525(r-l);LOC105233253(Upp1);LOC105233593(--)	K03027+K03002+K01937+K01937+K03022+K03016+K00757+K00940+K03005+K03783+K00962+K13421+K00757+K03004
Metabolism	Metabolism of other amino acids	beta-Alanine metabolism	3	17	0.681477	1	ko00410	LOC105224512(Aldh1b1);LOC105224871(Gad1);LOC105231281(CG12262)	K00128+K01580+K00249
Human Diseases	Infectious diseases	Toxoplasmosis	6	34	0.68821	1	ko05145	LOC105224006(Hsc70-1);LOC105225577(Pdk1);LOC105231830(Hsc70-2);LOC105232483(Lama1);LOC105232696(LanA);LOC105233538(Cyt-c-p)	K03283+K06276+K03283+K05637+K06240+K08738
Metabolism	Glycan biosynthesis and metabolism	Glycosylphosphatidylinositol(GPI)-anchor biosynthesis	4	23	0.693444	1	ko00563	LOC105222677(PIG-Z);LOC105225030(--);LOC105228186(PGAP1);LOC105233025(GPI11)	K08098+K09658+K05294+K05287
Organismal Systems	Endocrine system	Regulation of lipolysis in adipocyte	4	23	0.693444	1	ko04923	LOC105225223(rut);LOC105225576(Adcy9);LOC105230125(--);LOC105230478(Npr1)	K08041+K08049+K12323+K12323
Environmental Information Processing	Signal transduction	PI3K-Akt signaling pathway	17	94	0.698909	1	ko04151	LOC105222522(--);LOC105222583(thbs3a);LOC105223909(Col4a1);LOC105223911(COL4A1);LOC105223991(btl);LOC105225577(Pdk1);LOC105226058(RhoL);LOC105226434(Hsp83);LOC105227172(SSPO);LOC105229096(CycE);LOC105230174(Col1a2);LOC105232029(Gnb5);LOC105232191(Pepck);LOC105232251(Ggamma30A);LOC105232483(Lama1);LOC105232524(HSP90B1);LOC105232696(LanA)	K08131+K04659+K06237+K06237+K05093+K06276+K04392+K04079+K03900+K06626+K19719+K04539+K01596+K04547+K05637+K09487+K06240
Metabolism	Carbohydrate metabolism	Glycolysis / Gluconeogenesis	9	51	0.701859	1	ko00010	LOC105222006(GALM);LOC105222232(Gapdh);LOC105224512(Aldh1b1);LOC105224588(AKR1A1);LOC105227980(AcCoAS);LOC105228097(Pgi);LOC105231405(ImpL3);LOC105232191(Pepck);LOC105232983(Adh)	K01785+K00134+K00128+K00002+K01895+K01810+K00016+K01596+K00001
Environmental Information Processing	Signaling molecules and interaction	Neuroactive ligand-receptor interaction	12	68	0.716042	1	ko04080	LOC105224042(Grd);LOC105225162(thetaTry);LOC105225165(ami);LOC105226835(mAChR-A);LOC105228391(TRYP4);LOC105228392(TRYP3);LOC105229170(crhr1);LOC105230555(5-HT1A);LOC105233100(Grin2b);LOC109579825(thetaTry);LOC109580066(--);LOC115065809(Gabbr1)	K05175+K01312+K01312+K04131+K01312+K01312+K04578+K04153+K05210+K01312+K05210+K04615
Genetic Information Processing	Replication and repair	DNA replication	6	35	0.716319	1	ko03030	LOC105222969(Dna2);LOC105223304(Mcm6);LOC105226613(Mcm2);LOC105226860(DNA-ligI);LOC105229140(Rnaseh1);LOC105230222(Gnf1)	K10742+K02542+K02540+K10747+K03469+K10754
Metabolism	Carbohydrate metabolism	Butanoate metabolism	2	12	0.718097	1	ko00650	LOC105224871(Gad1);LOC105232621(ACAT2)	K01580+K00626
Organismal Systems	Endocrine system	Progesterone-mediated oocyte maturation	9	52	0.724671	1	ko04914	LOC105225223(rut);LOC105225576(Adcy9);LOC105226434(Hsp83);LOC105227347(polo);LOC105227418(CycA);LOC105229679(CycB);LOC105230219(--);LOC105231705(CycB3);LOC105234228(BUB1B)	K08041+K08049+K04079+K06631+K06627+K21770+K13728+K21771+K02178
Organismal Systems	Endocrine system	Relaxin signaling pathway	9	52	0.724671	1	ko04926	LOC105223909(Col4a1);LOC105223911(COL4A1);LOC105224558(TGFBR1);LOC105225223(rut);LOC105225576(Adcy9);LOC105229149(Nos);LOC105232029(Gnb5);LOC105232251(Ggamma30A);LOC105232345(Nos)	K06237+K06237+K04674+K08041+K08049+K13240+K04539+K04547+K13240
Genetic Information Processing	Replication and repair	Homologous recombination	4	24	0.726622	1	ko03440	LOC105228464(rad50);LOC105229007(--);LOC105231800(RAD51);LOC105233045(tefu)	K10866+K10871+K04482+K04728
Organismal Systems	Immune system	Th17 cell differentiation	4	24	0.726622	1	ko04659	LOC105224558(TGFBR1);LOC105226434(Hsp83);LOC105226958(CanA-14F);LOC105231797(sima)	K04674+K04079+K04348+K08268
Metabolism	Lipid metabolism	Synthesis and degradation of ketone bodies	1	6	0.732934	1	ko00072	LOC105232621(ACAT2)	K00626
Organismal Systems	Environmental adaptation	Circadian rhythm - fly	1	6	0.732934	1	ko04711	LOC105229038(HLF)	K09057
Human Diseases	Infectious diseases	Malaria	1	6	0.732934	1	ko05144	LOC105222583(thbs3a)	K04659
Organismal Systems	Immune system	Toll and Imd signaling pathway	14	80	0.737179	1	ko04624	LOC105222535(GNBP1);LOC105226802(ea);LOC105227455(etaTry);LOC105231286(PGRP-SD);LOC105231663(PGRP-LB);LOC105231782(CEC1);LOC105232010(GNBP3);LOC105232011(GNBP3);LOC105233457(spz);LOC105234252(key);LOC109579903(Ank3);LOC109579906(--);LOC115066596(Cfi);LOC115066711(--)	K20697+K20672+K20676+K01446+K01446+K20696+K20692+K20692+K20694+K20700+K10380+K10380+K20671+K20694
Human Diseases	Infectious diseases	Salmonella infection	6	36	0.742632	1	ko05132	LOC105225453(Act57B);LOC105226058(RhoL);LOC105228222(Act79B);LOC105229580(Act88F);LOC105229889(Act87E);LOC105233791(Wasl)	K05692+K04392+K05692+K05692+K05692+K05747
Human Diseases	Infectious diseases	Vibrio cholerae infection	9	53	0.746299	1	ko05110	LOC105225453(Act57B);LOC105225576(Adcy9);LOC105225976(Slc12a2);LOC105227818(ATP6V0A1);LOC105228222(Act79B);LOC105229580(Act88F);LOC105229889(Act87E);LOC105231750(Atp6v0a1);LOC105232161(Vha13)	K05692+K08049+K10951+K02154+K05692+K05692+K05692+K02154+K02152
Genetic Information Processing	Replication and repair	Mismatch repair	3	19	0.755172	1	ko03430	LOC105226860(DNA-ligI);LOC105228073(MLH1);LOC105230222(Gnf1)	K10747+K08734+K10754
Organismal Systems	Nervous system	Dopaminergic synapse	10	59	0.755238	1	ko04728	LOC105222117(Khc);LOC105222891(Galphaq);LOC105222892(Galphaq);LOC105222909(Gnaq);LOC105226958(CanA-14F);LOC105232029(Gnb5);LOC105232251(Ggamma30A);LOC105233100(Grin2b);LOC109579326(Gnaq);LOC109580066(--)	K10396+K04634+K04634+K04634+K04348+K04539+K04547+K05210+K04634+K05210
Human Diseases	Immune diseases	Rheumatoid arthritis	5	31	0.76152	1	ko05323	LOC105226824(Cp1);LOC105227818(ATP6V0A1);LOC105231750(Atp6v0a1);LOC105232161(Vha13);LOC105232835(Ctla2a)	K01365+K02154+K02154+K02152+K01365
Metabolism	Glycan biosynthesis and metabolism	Glycosaminoglycan biosynthesis - chondroitin sulfate / dermatan sulfate	1	7	0.78574	1	ko00532	LOC105226957(Chpf)	K00747
Metabolism	Metabolism of cofactors and vitamins	Riboflavin metabolism	1	7	0.78574	1	ko00740	LOC105226349(stp1)	K14394
Organismal Systems	Immune system	IL-17 signaling pathway	3	20	0.786528	1	ko04657	LOC105226434(Hsp83);LOC105228241(Erk7);LOC105232524(HSP90B1)	K04079+K19603+K09487
Human Diseases	Substance dependence	Cocaine addiction	3	20	0.786528	1	ko05030	LOC105224069(--);LOC105233100(Grin2b);LOC109580066(--)	K11716+K05210+K05210
Human Diseases	Infectious diseases	Human cytomegalovirus infection	12	72	0.788562	1	ko05163	LOC105222891(Galphaq);LOC105222892(Galphaq);LOC105222909(Gnaq);LOC105225223(rut);LOC105225576(Adcy9);LOC105226058(RhoL);LOC105226958(CanA-14F);LOC105232029(Gnb5);LOC105232251(Ggamma30A);LOC105232867(Calr);LOC105233538(Cyt-c-p);LOC109579326(Gnaq)	K04634+K04634+K04634+K08041+K08049+K04392+K04348+K04539+K04547+K08057+K08738+K04634
Organismal Systems	Endocrine system	Ovarian Steroidogenesis	2	14	0.796025	1	ko04913	LOC105225223(rut);LOC105225576(Adcy9)	K08041+K08049
Metabolism	Global and overview maps	Carbon metabolism	16	95	0.800464	1	ko01200	LOC105222232(Gapdh);LOC105222766(Shmt1);LOC105222926(Gdh);LOC105224026(PGP);LOC105224406(GOT2);LOC105224599(Gldc);LOC105224810(Idh1);LOC105226732(SdhD);LOC105227980(AcCoAS);LOC105228097(Pgi);LOC105228673(SdhA);LOC105229143(Tktl2);LOC105230177(Rpia);LOC105230508(Rpe);LOC105231281(CG12262);LOC105232621(ACAT2)	K00134+K00600+K00261+K19269+K14455+K00281+K00031+K00237+K01895+K01810+K00234+K00615+K01807+K01783+K00249+K00626
Organismal Systems	Nervous system	Retrograde endocannabinoid signaling	12	73	0.804447	1	ko04723	LOC105222891(Galphaq);LOC105222892(Galphaq);LOC105222909(Gnaq);LOC105224042(Grd);LOC105225223(rut);LOC105225576(Adcy9);LOC105227131(NDUFB5);LOC105228248(Dagla);LOC105232029(Gnb5);LOC105232251(Ggamma30A);LOC105232863(ND-ACP);LOC109579326(Gnaq)	K04634+K04634+K04634+K05175+K08041+K08049+K03961+K13806+K04539+K04547+K03955+K04634
Human Diseases	Infectious diseases	Influenza A	15	90	0.807985	1	ko05164	LOC105224006(Hsc70-1);LOC105224975(sesB);LOC105225162(thetaTry);LOC105225165(ami);LOC105225453(Act57B);LOC105228222(Act79B);LOC105228391(TRYP4);LOC105228392(TRYP3);LOC105228530(DNAJC3);LOC105229580(Act88F);LOC105229889(Act87E);LOC105230724(FDPS);LOC105231830(Hsc70-2);LOC105233538(Cyt-c-p);LOC109579825(thetaTry)	K03283+K05863+K01312+K01312+K05692+K05692+K01312+K01312+K09523+K05692+K05692+K00787+K03283+K08738+K01312
Environmental Information Processing	Signal transduction	FoxO signaling pathway	10	62	0.809175	1	ko04068	LOC105222157(HOMER2);LOC105224558(TGFBR1);LOC105225577(Pdk1);LOC105227188(--);LOC105227347(polo);LOC105229463(SAK);LOC105229679(CycB);LOC105231705(CycB3);LOC105232191(Pepck);LOC105233045(tefu)	K15010+K04674+K06276+K15464+K06631+K08863+K21770+K21771+K01596+K04728
Cellular Processes	Cellular community - eukaryotes	Tight junction	10	62	0.809175	1	ko04530	LOC105225453(Act57B);LOC105225618(Actn);LOC105226058(RhoL);LOC105228222(Act79B);LOC105229580(Act88F);LOC105229889(Act87E);LOC105231615(pnr);LOC105232619(alphaTub67C);LOC105233791(Wasl);LOC115065999(dlg1)	K05692+K05699+K04392+K05692+K05692+K05692+K09183+K07374+K05747+K12076
Metabolism	Amino acid metabolism	Valine, leucine and isoleucine degradation	5	33	0.809364	1	ko00280	LOC105223344(Mccc1);LOC105224512(Aldh1b1);LOC105227875(ACADSB);LOC105231281(CG12262);LOC105232621(ACAT2)	K01968+K00128+K09478+K00249+K00626
Organismal Systems	Development	Osteoclast differentiation	4	27	0.809946	1	ko04380	LOC105224558(TGFBR1);LOC105226058(RhoL);LOC105226958(CanA-14F);LOC105229269(Btk29A)	K04674+K04392+K04348+K07364
Organismal Systems	Immune system	Cytosolic DNA-sensing pathway	3	21	0.814483	1	ko04623	LOC105223075(Polr1c);LOC105224743(Polr3h);LOC105225953(POLR2H)	K03027+K03022+K03016
Environmental Information Processing	Signal transduction	Wnt signaling pathway	12	74	0.819445	1	ko04310	LOC105224601(pont);LOC105224647(esn);LOC105225090(Lrp6);LOC105225549(wg);LOC105226058(RhoL);LOC105226202(Wnt5);LOC105226958(CanA-14F);LOC105227682(Wnt2);LOC105228235(por);LOC105228851(shf);LOC105232091(Axn);LOC115066525(Wnt4)	K04499+K04511+K03068+K03209+K04392+K00444+K04348+K00572+K00181+K01691+K02157+K01064
Environmental Information Processing	Signaling molecules and interaction	Cell adhesion molecules (CAMs)	1	8	0.828118	1	ko04514	LOC105233515(Lar)	K05695
Metabolism	Carbohydrate metabolism	Pyruvate metabolism	6	40	0.830218	1	ko00620	LOC105224512(Aldh1b1);LOC105227980(AcCoAS);LOC105231405(ImpL3);LOC105231564(Acyp);LOC105232191(Pepck);LOC105232621(ACAT2)	K00128+K01895+K00016+K01512+K01596+K00626
Human Diseases	Cancers	Breast cancer	6	40	0.830218	1	ko05224	LOC105225090(Lrp6);LOC105225549(wg);LOC105226202(Wnt5);LOC105227682(Wnt2);LOC105232091(Axn);LOC115066525(Wnt4)	K03068+K03209+K00444+K00572+K02157+K01064
Organismal Systems	Aging	Longevity regulating pathway - multiple species	7	46	0.831601	1	ko04213	LOC105224006(Hsc70-1);LOC105225223(rut);LOC105225576(Adcy9);LOC105228868(Ilp7);LOC105229288(EIF4EBP1);LOC105229497(SOD1);LOC105231830(Hsc70-2)	K03283+K08041+K08049+K19805+K18644+K04565+K03283
Cellular Processes	Cellular community - eukaryotes	Signaling pathways regulating pluripotency of stem cells	7	46	0.831601	1	ko04550	LOC105223991(btl);LOC105225468(egg);LOC105225549(wg);LOC105226202(Wnt5);LOC105227682(Wnt2);LOC105232091(Axn);LOC115066525(Wnt4)	K05093+K11421+K03209+K00444+K00572+K02157+K01064
Organismal Systems	Excretory system	Vasopressin-regulated water reabsorption	3	22	0.839271	1	ko04962	LOC105225576(Adcy9);LOC105226961(comt);LOC105232186(ctp)	K08049+K06027+K10418
Cellular Processes	Cell motility	Regulation of actin cytoskeleton	10	64	0.839882	1	ko04810	LOC105223991(btl);LOC105225453(Act57B);LOC105225618(Actn);LOC105226058(RhoL);LOC105226835(mAChR-A);LOC105228222(Act79B);LOC105229580(Act88F);LOC105229886(Gel);LOC105229889(Act87E);LOC105233791(Wasl)	K05093+K05692+K05699+K04392+K04131+K05692+K05692+K05768+K05692+K05747
Human Diseases	Cancers	MicroRNAs in cancer	10	64	0.839882	1	ko05206	LOC105223845(Abcb1a);LOC105224675(dcr-1);LOC105224907(sn);LOC105225224(--);LOC105225332(--);LOC105226582(Tm1);LOC105227710(wech);LOC105229096(CycE);LOC105231411(Kif23);LOC105233045(tefu)	K05658+K11592+K17455+K09409+K04381+K10373+K12035+K06626+K17387+K04728
Environmental Information Processing	Signal transduction	Hippo signaling pathway	11	70	0.843294	1	ko04390	LOC105224558(TGFBR1);LOC105225453(Act57B);LOC105225549(wg);LOC105226202(Wnt5);LOC105227682(Wnt2);LOC105228222(Act79B);LOC105229580(Act88F);LOC105229889(Act87E);LOC105232091(Axn);LOC115065999(dlg1);LOC115066525(Wnt4)	K04674+K05692+K03209+K00444+K00572+K05692+K05692+K05692+K02157+K12076+K01064
Human Diseases	Cancers	Colorectal cancer	5	35	0.849241	1	ko05210	LOC105224558(TGFBR1);LOC105226058(RhoL);LOC105228073(MLH1);LOC105232091(Axn);LOC105233538(Cyt-c-p)	K04674+K04392+K08734+K02157+K08738
Human Diseases	Infectious diseases	Human papillomavirus infection	22	133	0.855368	1	ko05165	LOC105222522(--);LOC105222583(thbs3a);LOC105223909(Col4a1);LOC105223911(COL4A1);LOC105225549(wg);LOC105225766(HDAC11);LOC105226202(Wnt5);LOC105227172(SSPO);LOC105227418(CycA);LOC105227682(Wnt2);LOC105227818(ATP6V0A1);LOC105229096(CycE);LOC105229760(HDAC6);LOC105230174(Col1a2);LOC105231750(Atp6v0a1);LOC105232091(Axn);LOC105232161(Vha13);LOC105232483(Lama1);LOC105232696(LanA);LOC105233045(tefu);LOC…	K08131+K04659+K06237+K06237+K03209+K11418+K00444+K03900+K06627+K00572+K02154+K06626+K11407+K19719+K02154+K02157+K02152+K05637+K06240+K04728+K12076+K01064
Organismal Systems	Excretory system	Collecting duct acid secretion	3	23	0.861144	1	ko04966	LOC105227818(ATP6V0A1);LOC105231750(Atp6v0a1);LOC105232161(Vha13)	K02154+K02154+K02152
Environmental Information Processing	Signaling molecules and interaction	Cytokine-cytokine receptor interaction	1	9	0.862125	1	ko04060	LOC105224558(TGFBR1)	K04674
Cellular Processes	Cell growth and death	Necroptosis	6	42	0.864113	1	ko04217	LOC105222926(Gdh);LOC105224138(Gs2);LOC105224975(sesB);LOC105226434(Hsp83);LOC105226955(SCM-2);LOC105228822(Dsp1)	K00261+K01915+K05863+K04079+K00522+K10802
Environmental Information Processing	Signal transduction	Hippo signaling pathway - multiple species	2	17	0.877301	1	ko04392	LOC105223592(ds);LOC105229262(ex)	K16507+K16683
Organismal Systems	Immune system	Fc gamma R-mediated phagocytosis	7	49	0.877389	1	ko04666	LOC105226058(RhoL);LOC105227846(PLPP1);LOC105227847(PLPP3);LOC105227848(PLPP1);LOC105229886(Gel);LOC105231000(PLPP2);LOC105233791(Wasl)	K04392+K01080+K01080+K01080+K05768+K01080+K05747
Organismal Systems	Nervous system	Synaptic vesicle cycle	7	49	0.877389	1	ko04721	LOC105222612(Snap25);LOC105222832(UNC13A);LOC105226961(comt);LOC105227818(ATP6V0A1);LOC105231750(Atp6v0a1);LOC105232068(Rop);LOC105232161(Vha13)	K18211+K15293+K06027+K02154+K02154+K15292+K02152
Human Diseases	Endocrine and metabolic diseases	Insulin resistance	7	49	0.877389	1	ko04931	LOC105225577(Pdk1);LOC105231918(GFPT2);LOC105232048(csw);LOC105232191(Pepck);LOC105232625(Gbs-76A);LOC105233515(Lar);MSTRG.2113(SLC27A4)	K06276+K00820+K07293+K01596+K07189+K05695+K08745
Organismal Systems	Endocrine system	Thyroid hormone signaling pathway	10	67	0.87858	1	ko04919	LOC105223307(--);LOC105225156(skd);LOC105225453(Act57B);LOC105225577(Pdk1);LOC105228222(Act79B);LOC105229580(Act88F);LOC105229794(Mhc);LOC105229889(Act87E);LOC105231615(pnr);LOC105231797(sima)	K01540+K15164+K05692+K06276+K05692+K05692+K17751+K05692+K09183+K08268
Human Diseases	Cancers	Endometrial cancer	3	24	0.880362	1	ko05213	LOC105225577(Pdk1);LOC105228073(MLH1);LOC105232091(Axn)	K06276+K08734+K02157
Metabolism	Metabolism of cofactors and vitamins	One carbon pool by folate	1	10	0.889412	1	ko00670	LOC105222766(Shmt1)	K00600
Human Diseases	Infectious diseases	Kaposi sarcoma-associated herpesvirus infection	7	50	0.890151	1	ko05167	LOC105226058(RhoL);LOC105226958(CanA-14F);LOC105228807(MAPk-Ak2);LOC105231797(sima);LOC105232029(Gnb5);LOC105232251(Ggamma30A);LOC105233538(Cyt-c-p)	K04392+K04348+K04443+K08268+K04539+K04547+K08738
Human Diseases	Infectious diseases	HTLV-I infection	16	103	0.890371	1	ko05166	LOC105223735(lok);LOC105224558(TGFBR1);LOC105224975(sesB);LOC105225223(rut);LOC105225549(wg);LOC105225576(Adcy9);LOC105226202(Wnt5);LOC105226958(CanA-14F);LOC105227682(Wnt2);LOC105228165(Nipped-A);LOC105229679(CycB);LOC105230724(FDPS);LOC105232867(Calr);LOC105233045(tefu);LOC115065999(dlg1);LOC115066525(Wnt4)	K06641+K04674+K05863+K08041+K03209+K08049+K00444+K04348+K00572+K08874+K21770+K00787+K08057+K04728+K12076+K01064
Organismal Systems	Sensory system	Inflammatory mediator regulation of TRP channels	6	44	0.892206	1	ko04750	LOC105222891(Galphaq);LOC105222892(Galphaq);LOC105222909(Gnaq);LOC105225223(rut);LOC105225576(Adcy9);LOC109579326(Gnaq)	K04634+K04634+K04634+K08041+K08049+K04634
Environmental Information Processing	Signal transduction	Hedgehog signaling pathway	2	18	0.896937	1	ko04340	LOC105223918(smo);LOC105227001(KIF3A)	K06226+K10394
Organismal Systems	Digestive system	Carbohydrate digestion and absorption	2	18	0.896937	1	ko04973	LOC105223307(--);LOC105224682(Amy-p)	K01540+K01176
Environmental Information Processing	Signal transduction	Hedgehog signaling pathway - fly	3	25	0.897178	1	ko04341	LOC105223918(smo);LOC105224522(cos);LOC105227616(hh)	K06226+K06227+K06224
Human Diseases	Cancers	Pancreatic cancer	3	25	0.897178	1	ko05212	LOC105224558(TGFBR1);LOC105226058(RhoL);LOC105231800(RAD51)	K04674+K04392+K04482
Environmental Information Processing	Signal transduction	Phospholipase D signaling pathway	9	63	0.899835	1	ko04072	LOC105225223(rut);LOC105225576(Adcy9);LOC105227846(PLPP1);LOC105227847(PLPP3);LOC105227848(PLPP1);LOC105230334(CG34384);LOC105231000(PLPP2);LOC105232048(csw);LOC105232103(AGPAT1)	K08041+K08049+K01080+K01080+K01080+K00901+K01080+K07293+K13509
Metabolism	Carbohydrate metabolism	Galactose metabolism	4	32	0.902007	1	ko00052	LOC105222006(GALM);LOC105225659(GLB1);LOC105227741(NAGA);LOC105228045(Mal-A3)	K01785+K12309+K01189+K01187
Organismal Systems	Development	Dorso-ventral axis formation	4	32	0.902007	1	ko04320	LOC105226448(rho);LOC105228744(aop);LOC105230567(aub);LOC105232402(grk)	K02857+K03211+K02156+K02447
Organismal Systems	Immune system	T cell receptor signaling pathway	4	32	0.902007	1	ko04660	LOC105225577(Pdk1);LOC105226958(CanA-14F);LOC105229269(Btk29A);LOC115065999(dlg1)	K06276+K04348+K07364+K12076
Human Diseases	Substance dependence	Alcoholism	6	45	0.904296	1	ko05034	LOC105225766(HDAC11);LOC105229760(HDAC6);LOC105232029(Gnb5);LOC105232251(Ggamma30A);LOC105233100(Grin2b);LOC109580066(--)	K11418+K11407+K04539+K04547+K05210+K05210
Environmental Information Processing	Signal transduction	Ras signaling pathway	11	76	0.909474	1	ko04014	LOC105223991(btl);LOC105224532(PLA2);LOC105225021(RasGAP1);LOC105226058(RhoL);LOC105227365(PLA2G12B);LOC105232029(Gnb5);LOC105232048(csw);LOC105232251(Ggamma30A);LOC105232554(--);LOC105233100(Grin2b);LOC109580066(--)	K05093+K01047+K12380+K04392+K01047+K04539+K07293+K04547+K01047+K05210+K05210
Cellular Processes	Cell growth and death	Cell cycle	11	76	0.909474	1	ko04110	LOC105223304(Mcm6);LOC105223735(lok);LOC105226613(Mcm2);LOC105227347(polo);LOC105227418(CycA);LOC105229096(CycE);LOC105229679(CycB);LOC105230219(--);LOC105231705(CycB3);LOC105233045(tefu);LOC105234228(BUB1B)	K02542+K06641+K02540+K06631+K06627+K06626+K21770+K13728+K21771+K04728+K02178
Human Diseases	Infectious diseases	Measles	4	33	0.914785	1	ko05162	LOC105224006(Hsc70-1);LOC105229096(CycE);LOC105231830(Hsc70-2);LOC105233949(Rchy1)	K03283+K06626+K03283+K10144
Genetic Information Processing	Replication and repair	Nucleotide excision repair	5	40	0.919568	1	ko03420	LOC105223535(mei-9);LOC105226657(ercc5);LOC105226860(DNA-ligI);LOC105230222(Gnf1);LOC105233982(Rad23b)	K10848+K10846+K10747+K10754+K10839
Organismal Systems	Endocrine system	GnRH signaling pathway	6	47	0.925008	1	ko04912	LOC105222891(Galphaq);LOC105222892(Galphaq);LOC105222909(Gnaq);LOC105225223(rut);LOC105225576(Adcy9);LOC109579326(Gnaq)	K04634+K04634+K04634+K08041+K08049+K04634
Human Diseases	Cancers	Central carbon metabolism in cancer	4	34	0.926056	1	ko05230	LOC105223991(btl);LOC105224810(Idh1);LOC105231405(ImpL3);LOC105231797(sima)	K05093+K00031+K00016+K08268
Human Diseases	Cancers	Thyroid cancer	1	12	0.92887	1	ko05216	LOC105225398(Mtor)	K09291
Organismal Systems	Endocrine system	Glucagon signaling pathway	7	54	0.930567	1	ko04922	LOC105222891(Galphaq);LOC105222892(Galphaq);LOC105222909(Gnaq);LOC105226958(CanA-14F);LOC105231405(ImpL3);LOC105232191(Pepck);LOC109579326(Gnaq)	K04634+K04634+K04634+K04348+K00016+K01596+K04634
Organismal Systems	Immune system	Chemokine signaling pathway	6	48	0.933806	1	ko04062	LOC105225223(rut);LOC105225576(Adcy9);LOC105226058(RhoL);LOC105232029(Gnb5);LOC105232251(Ggamma30A);LOC105233791(Wasl)	K08041+K08049+K04392+K04539+K04547+K05747
Organismal Systems	Immune system	B cell receptor signaling pathway	2	21	0.939658	1	ko04662	LOC105226058(RhoL);LOC105226958(CanA-14F)	K04392+K04348
Metabolism	Metabolism of cofactors and vitamins	Nicotinate and nicotinamide metabolism	1	13	0.94296	1	ko00760	LOC105227970(PNP)	K03783
Organismal Systems	Immune system	C-type lectin receptor signaling pathway	3	29	0.945129	1	ko04625	LOC105226958(CanA-14F);LOC105228807(MAPk-Ak2);LOC105232048(csw)	K04348+K04443+K07293
Organismal Systems	Immune system	Natural killer cell mediated cytotoxicity	3	29	0.945129	1	ko04650	LOC105226058(RhoL);LOC105226958(CanA-14F);LOC105232048(csw)	K04392+K04348+K07293
Environmental Information Processing	Signal transduction	AMPK signaling pathway	7	57	0.951686	1	ko04152	LOC105225577(Pdk1);LOC105226031(Fasn);LOC105226742(Fasn);LOC105227418(CycA);LOC105231787(D11DS);LOC105232191(Pepck);LOC105233729(Scd1)	K06276+K00665+K00665+K06627+K00507+K01596+K00507
Metabolism	Carbohydrate metabolism	Citrate cycle (TCA cycle)	4	37	0.952261	1	ko00020	LOC105224810(Idh1);LOC105226732(SdhD);LOC105228673(SdhA);LOC105232191(Pepck)	K00031+K00237+K00234+K01596
Human Diseases	Endocrine and metabolic diseases	AGE-RAGE signaling pathway in diabetic complications	4	38	0.958892	1	ko04933	LOC105223909(Col4a1);LOC105223911(COL4A1);LOC105224558(TGFBR1);LOC105226058(RhoL)	K06237+K06237+K04674+K04392
Environmental Information Processing	Signal transduction	TGF-beta signaling pathway	3	31	0.960379	1	ko04350	LOC105222840(ZFYVE9);LOC105224558(TGFBR1);LOC105225527(sog)	K04679+K04674+K04657
Environmental Information Processing	Signal transduction	VEGF signaling pathway	3	31	0.960379	1	ko04370	LOC105226058(RhoL);LOC105226958(CanA-14F);LOC105228807(MAPk-Ak2)	K04392+K04348+K04443
Organismal Systems	Excretory system	Aldosterone-regulated sodium reabsorption	2	24	0.9652	1	ko04960	LOC105223307(--);LOC105225577(Pdk1)	K01540+K06276
Human Diseases	Neurodegenerative diseases	Huntington disease	21	146	0.965523	1	ko05016	LOC105222891(Galphaq);LOC105222892(Galphaq);LOC105222909(Gnaq);LOC105223190(sun);LOC105224751(Dnai2);LOC105224975(sesB);LOC105225953(POLR2H);LOC105226068(COX5A);LOC105226732(SdhD);LOC105227131(NDUFB5);LOC105228673(SdhA);LOC105229497(SOD1);LOC105229678(blw);LOC105229962(COX7C);LOC105232504(ATP5MC2);LOC105232863(ND-ACP);LOC105233100(Grin2b);LOC105233317(Dnah2);LOC105233538(Cyt-c-p);LOC109579326(Gna…	K04634+K04634+K04634+K02135+K11143+K05863+K03016+K02264+K00237+K03961+K00234+K04565+K02132+K02272+K02128+K03955+K05210+K10408+K08738+K04634+K05210
Environmental Information Processing	Signal transduction	NF-kappa B signaling pathway	1	16	0.9706	1	ko04064	LOC105233045(tefu)	K04728
Metabolism	Carbohydrate metabolism	Fructose and mannose metabolism	2	25	0.971115	1	ko00051	LOC105225298(CG10688);LOC105225946(Khk)	K17497+K00846
Environmental Information Processing	Signal transduction	MAPK signaling pathway - fly	11	87	0.971179	1	ko04013	LOC105225021(RasGAP1);LOC105225731(tsl);LOC105226058(RhoL);LOC105228744(aop);LOC105229269(Btk29A);LOC105229816(wgn);LOC105230340(sev);LOC105232048(csw);LOC105232402(grk);LOC105233721(vn);LOC115066508(--)	K12380+K12377+K04392+K03211+K07364+K16679+K05088+K07293+K02447+K16690+K20227
Metabolism	Carbohydrate metabolism	Starch and sucrose metabolism	3	33	0.97158	1	ko00500	LOC105224682(Amy-p);LOC105228045(Mal-A3);LOC105228097(Pgi)	K01176+K01187+K01810
Human Diseases	Neurodegenerative diseases	Parkinson disease	13	100	0.972557	1	ko05012	LOC105223190(sun);LOC105224975(sesB);LOC105226068(COX5A);LOC105226732(SdhD);LOC105227131(NDUFB5);LOC105228673(SdhA);LOC105228809(UBE2G2);LOC105229678(blw);LOC105229787(HtrA2);LOC105229962(COX7C);LOC105232504(ATP5MC2);LOC105232863(ND-ACP);LOC105233538(Cyt-c-p)	K02135+K05863+K02264+K00237+K03961+K00234+K04555+K02132+K08669+K02272+K02128+K03955+K08738
Cellular Processes	Cell growth and death	Oocyte meiosis	8	69	0.975504	1	ko04114	LOC105225223(rut);LOC105225576(Adcy9);LOC105226958(CanA-14F);LOC105227347(polo);LOC105229096(CycE);LOC105229679(CycB);LOC105230219(--);LOC105234228(BUB1B)	K08041+K08049+K04348+K06631+K06626+K21770+K13728+K02178
Human Diseases	Infectious diseases	Epithelial cell signaling in Helicobacter pylori infection	5	49	0.977019	1	ko05120	LOC105226058(RhoL);LOC105227818(ATP6V0A1);LOC105231750(Atp6v0a1);LOC105232048(csw);LOC105232161(Vha13)	K04392+K02154+K02154+K07293+K02152
Human Diseases	Cancers	Chronic myeloid leukemia	2	27	0.980173	1	ko05220	LOC105224558(TGFBR1);LOC105232048(csw)	K04674+K07293
Environmental Information Processing	Signal transduction	Sphingolipid signaling pathway	7	64	0.980371	1	ko04071	LOC105222891(Galphaq);LOC105222892(Galphaq);LOC105222909(Gnaq);LOC105225577(Pdk1);LOC105226058(RhoL);LOC105231761(CDase);LOC109579326(Gnaq)	K04634+K04634+K04634+K06276+K04392+K12349+K04634
Cellular Processes	Transport and catabolism	Mitophagy - animal	2	28	0.983602	1	ko04137	LOC105227188(--);LOC105231797(sima)	K15464+K08268
Organismal Systems	Immune system	Fc epsilon RI signaling pathway	2	28	0.983602	1	ko04664	LOC105225577(Pdk1);LOC105226058(RhoL)	K06276+K04392
Environmental Information Processing	Signal transduction	Jak-STAT signaling pathway	1	19	0.984856	1	ko04630	LOC105232048(csw)	K07293
Human Diseases	Cancers	Acute myeloid leukemia	1	19	0.984856	1	ko05221	LOC105227418(CycA)	K06627
Human Diseases	Substance dependence	Amphetamine addiction	3	37	0.985633	1	ko05031	LOC105226958(CanA-14F);LOC105233100(Grin2b);LOC109580066(--)	K04348+K05210+K05210
Human Diseases	Cancers	Renal cell carcinoma	3	37	0.985633	1	ko05211	LOC105226058(RhoL);LOC105231797(sima);LOC105232048(csw)	K04392+K08268+K07293
Human Diseases	Cancers	Non-small cell lung cancer	2	29	0.986451	1	ko05223	LOC105225577(Pdk1);LOC105226691(Alk)	K06276+K05119
Organismal Systems	Immune system	NOD-like receptor signaling pathway	3	38	0.987924	1	ko04621	LOC105221787(Dhx33);LOC105226171(Txn2);LOC105226434(Hsp83)	K17820+K03671+K04079
Organismal Systems	Nervous system	Neurotrophin signaling pathway	4	46	0.988254	1	ko04722	LOC105225577(Pdk1);LOC105226058(RhoL);LOC105228807(MAPk-Ak2);LOC105232048(csw)	K06276+K04392+K04443+K07293
Organismal Systems	Immune system	Th1 and Th2 cell differentiation	1	21	0.990273	1	ko04658	LOC105226958(CanA-14F)	K04348
Organismal Systems	Endocrine system	Insulin signaling pathway	6	63	0.991581	1	ko04910	LOC105225577(Pdk1);LOC105226031(Fasn);LOC105226742(Fasn);LOC105232191(Pepck);LOC105232625(Gbs-76A);LOC105233515(Lar)	K06276+K00665+K00665+K01596+K07189+K05695
Cellular Processes	Transport and catabolism	Autophagy - animal	10	91	0.991799	1	ko04140	LOC105223306(LAMP1);LOC105225577(Pdk1);LOC105226824(Cp1);LOC105227188(--);LOC105228822(Dsp1);LOC105229147(Mtmr14);LOC105229613(RB1CC1);LOC105231797(sima);LOC105232835(Ctla2a);LOC105233378(WIPI1)	K06528+K06276+K01365+K15464+K10802+K18086+K17589+K08268+K01365+K17908
Environmental Information Processing	Signal transduction	MAPK signaling pathway	10	93	0.993655	1	ko04010	LOC105223991(btl);LOC105224006(Hsc70-1);LOC105224558(TGFBR1);LOC105225332(--);LOC105226058(RhoL);LOC105226958(CanA-14F);LOC105228807(MAPk-Ak2);LOC105231331(CACNA2D3);LOC105231830(Hsc70-2);LOC105233740(--)	K05093+K03283+K04674+K04381+K04392+K04348+K04443+K04860+K03283+K04380
Cellular Processes	Transport and catabolism	Autophagy - other eukaryotes	1	23	0.993754	1	ko04136	LOC105233378(WIPI1)	K17908
Genetic Information Processing	Folding, sorting and degradation	RNA degradation	4	50	0.993918	1	ko03018	LOC105223684(Trf4-1);LOC105225738(Not10);LOC105227093(Dis3);LOC105231012(PNPT1)	K03514+K12607+K12585+K00962
Human Diseases	Cancers	Viral carcinogenesis	9	87	0.994328	1	ko05203	LOC105225618(Actn);LOC105225766(HDAC11);LOC105226058(RhoL);LOC105227418(CycA);LOC105228807(MAPk-Ak2);LOC105229096(CycE);LOC105229760(HDAC6);LOC105229886(Gel);LOC115065999(dlg1)	K05699+K11418+K04392+K06627+K04443+K06626+K11407+K05768+K12076
Human Diseases	Infectious diseases	Hepatitis B	4	51	0.994855	1	ko05161	LOC105224558(TGFBR1);LOC105227418(CycA);LOC105229096(CycE);LOC105233538(Cyt-c-p)	K04674+K06627+K06626+K08738
Organismal Systems	Aging	Longevity regulating pathway - mammal	3	43	0.995021	1	ko04211	LOC105225223(rut);LOC105225576(Adcy9);LOC105229613(RB1CC1)	K08041+K08049+K17589
Metabolism	Energy metabolism	Oxidative phosphorylation	12	109	0.995395	1	ko00190	LOC105223190(sun);LOC105226068(COX5A);LOC105226732(SdhD);LOC105227131(NDUFB5);LOC105227818(ATP6V0A1);LOC105228673(SdhA);LOC105229678(blw);LOC105229962(COX7C);LOC105231750(Atp6v0a1);LOC105232161(Vha13);LOC105232504(ATP5MC2);LOC105232863(ND-ACP)	K02135+K02264+K00237+K03961+K02154+K00234+K02132+K02272+K02154+K02152+K02128+K03955
Human Diseases	Drug resistance	Endocrine resistance	2	35	0.995772	1	ko01522	LOC105225223(rut);LOC105225576(Adcy9)	K08041+K08049
Organismal Systems	Environmental adaptation	Thermogenesis	18	151	0.996672	1	ko04714	LOC105223190(sun);LOC105224678(SPAC19A8.14);LOC105225223(rut);LOC105225453(Act57B);LOC105225576(Adcy9);LOC105226068(COX5A);LOC105226732(SdhD);LOC105227131(NDUFB5);LOC105228222(Act79B);LOC105228673(SdhA);LOC105229580(Act88F);LOC105229678(blw);LOC105229889(Act87E);LOC105229962(COX7C);LOC105230125(--);LOC105230478(Npr1);LOC105232504(ATP5MC2);LOC105232863(ND-ACP)	K02135+K18177+K08041+K05692+K08049+K02264+K00237+K03961+K05692+K00234+K05692+K02132+K05692+K02272+K12323+K12323+K02128+K03955
Human Diseases	Infectious diseases	Hepatitis C	1	26	0.996788	1	ko05160	LOC105225577(Pdk1)	K06276
Human Diseases	Infectious diseases	Tuberculosis	5	62	0.996928	1	ko05152	LOC105223306(LAMP1);LOC105226958(CanA-14F);LOC105227818(ATP6V0A1);LOC105231750(Atp6v0a1);LOC105233538(Cyt-c-p)	K06528+K04348+K02154+K02154+K08738
Organismal Systems	Immune system	Toll-like receptor signaling pathway	1	27	0.997427	1	ko04620	LOC105226058(RhoL)	K04392
Cellular Processes	Transport and catabolism	Endocytosis	11	109	0.998096	1	ko04144	LOC105222101(--);LOC105222117(Khc);LOC105222840(ZFYVE9);LOC105223991(btl);LOC105224006(Hsc70-1);LOC105224558(TGFBR1);LOC105228521(spartin);LOC105231724(snf8);LOC105231830(Hsc70-2);LOC105233791(Wasl);LOC105234137(Hrs)	K06564+K10396+K04679+K05093+K03283+K04674+K19366+K12188+K03283+K05747+K12182
Environmental Information Processing	Signal transduction	mTOR signaling pathway	9	95	0.998124	1	ko04150	LOC105225090(Lrp6);LOC105225549(wg);LOC105225577(Pdk1);LOC105226202(Wnt5);LOC105227271(Rictor);LOC105227682(Wnt2);LOC105229852(SLC3A2);LOC105232161(Vha13);LOC115066525(Wnt4)	K03068+K03209+K06276+K00444+K08267+K00572+K06519+K02152+K01064
Genetic Information Processing	Folding, sorting and degradation	Ubiquitin mediated proteolysis	7	81	0.998292	1	ko04120	LOC105224961(KLHL12);LOC105226122(HERC2);LOC105228809(UBE2G2);LOC105229226(CG4502);LOC105232205(--);LOC105233115(Huwe1);LOC105233949(Rchy1)	K10456+K10595+K04555+K10582+K10456+K10592+K10144
Metabolism	Carbohydrate metabolism	Inositol phosphate metabolism	2	41	0.998715	1	ko00562	LOC105222319(Inos);LOC105229147(Mtmr14)	K01858+K18086
Human Diseases	Drug resistance	EGFR tyrosine kinase inhibitor resistance	1	33	0.999321	1	ko01521	LOC105223991(btl)	K05093
Human Diseases	Endocrine and metabolic diseases	Non-alcoholic fatty liver disease (NAFLD)	8	96	0.999455	1	ko04932	LOC105226058(RhoL);LOC105226068(COX5A);LOC105226732(SdhD);LOC105227131(NDUFB5);LOC105228673(SdhA);LOC105229962(COX7C);LOC105232863(ND-ACP);LOC105233538(Cyt-c-p)	K04392+K02264+K00237+K03961+K00234+K02272+K03955+K08738
Environmental Information Processing	Signal transduction	Phosphatidylinositol signaling system	3	56	0.999552	1	ko04070	LOC105222459(CdsA);LOC105229147(Mtmr14);LOC105230334(CG34384)	K00981+K18086+K00901
Human Diseases	Infectious diseases	Herpes simplex infection	4	65	0.999552	1	ko05168	LOC105232048(csw);LOC105233009(--);LOC105233361(SRSF7);LOC105233538(Cyt-c-p)	K07293+K15414+K12896+K08738
Environmental Information Processing	Signal transduction	HIF-1 signaling pathway	3	59	0.999747	1	ko04066	LOC105222232(Gapdh);LOC105231405(ImpL3);LOC105231797(sima)	K00134+K00016+K08268
Genetic Information Processing	Translation	RNA transport	10	117	0.99978	1	ko03013	LOC105224740(POP1);LOC105225398(Mtor);LOC105226455(Eif4g3);LOC105229153(STRAP);LOC105229288(EIF4EBP1);LOC105230037(DDX20);LOC105230873(Ef1alpha100E);LOC105232194(nmd3);LOC105233687(EIF5B);LOC109580059(--)	K01164+K09291+K03260+K13137+K18644+K13131+K03231+K07562+K03243+K14314
Genetic Information Processing	Transcription	Spliceosome	9	112	0.999851	1	ko03040	LOC105222537(Ddx17);LOC105224006(Hsc70-1);LOC105224424(Sf3b3);LOC105226454(hoip);LOC105228680(snrnp27);LOC105228820(Ddx17);LOC105230099(Rm62);LOC105231830(Hsc70-2);LOC105233361(SRSF7)	K12823+K03283+K12830+K12845+K12846+K12823+K12823+K03283+K12896
Human Diseases	Infectious diseases	Epstein-Barr virus infection	6	98	0.999973	1	ko05169	LOC105223075(Polr1c);LOC105224006(Hsc70-1);LOC105224743(Polr3h);LOC105225953(POLR2H);LOC105227418(CycA);LOC105231830(Hsc70-2)	K03027+K03283+K03022+K03016+K06627+K03283
Genetic Information Processing	Translation	Ribosome	4	123	1	1	ko03010	LOC105222138(RpS20);LOC105223781(mrpl20);LOC105224390(rlp7);LOC105233101(sta)	K02969+K02887+K02937+K02998
