# Supplementary material for: Protein feeding mediates sex pheromone biosynthesis in an insect
Source: eLife. 2023 Jan 19;12:e83469. doi: 10.7554/eLife.83469 (PMC9908074; doi:10.7554/eLife.83469)
Supplement: Supplementary file 9. [file elife-83469-supp9.xlsx]

## Sheet: Sheet1
Supplementary file 9 Primers used in the study
Primer name	Sequence (5’-3’)	Length (bp)
α-TUB-F	CGCATTCATGGTTGATAACG	237
α-TUB-R	GGGCACCAAGTTAGTCTGGA
ACT5-F	CAACTCACCCGCAATGTATG	241
ACT5-R	CGCTCAGCAGTGGTTGTAAA
Sardh-F	CGAAGTCGCGACATACTCCA	241
Sardh -R	TTCGCACACCATCGGGTTTA
dsSardh-F	GGATCCTAATACGACTCACTATATCGCACAGAATCGTGACACA	288
dsSardh -R	GGATCCTAATACGACTCACTATACCTCGAGCGCTTCTTCGTAA
16S-338F	ACTCCTACGGGAGGCAGCAG	180
16S-518R	ATTACCGCGGCTGCTGG
16S-341F	CCTACGGGNGGCWGCAG	465
16S-806R	GGACTACHVGGGTATCTAAT
Note: The red sequence is the T7 promoter.
